# Supplementary material for: Expression Characteristics in Roots, Phloem, Leaves, Flowers and Fruits of Apple circRNA
Source: Genes (Basel). 2022 Apr 18;13(4):712. doi: 10.3390/genes13040712 (PMC9030095; doi:10.3390/genes13040712)
Supplement: Supplementary file 1 [file genes-13-00712-s001.zip]

Archive with 14 entries (14 files):
- Figure S.pdf
- Table S1.xlsx
- Table S10.xlsx
- Table S11.xlsx
- Table S12.xls
- Table S13.xlsx
- Table S2.xlsx
- Table S3.xlsx
- Table S4.xlsx
- Table S5.xlsx
- Table S6.xlsx
- Table S7.xlsx
- Table S8.xlsx
- Table S9.xlsx
