# Supplementary material for: Expression Characteristics in Roots, Phloem, Leaves, Flowers and Fruits of Apple circRNA
Source: Genes (Basel). 2022 Apr 18;13(4):712. doi: 10.3390/genes13040712 (PMC9030095; doi:10.3390/genes13040712)
Supplement: Supplementary file 1 [file genes-13-00712-s001.zip › Table S1.xlsx]

## Sheet: Sheet1
Table S1 Information of primers
Name of primers	sequence of primers (5' to 3')	TM
qActin-F	TGACCGAATGAGCAAGGAAATTACT	60
qActin-R	TACTCAGCTTTGGCAATCCACATC
Chr11:1679797-F	CAGCACAGGACCATTTTCTCA	60
Chr11:1679797-R	GAGCACAGAGAACTTTTGTCCAG
Chr01:21162287-F	TGGAAACTGGGACGGCAG	60
Chr01:21162287-R	TGGTGTGGAGATGAGAGTGGT
