# Supplementary material for: Expression Characteristics in Roots, Phloem, Leaves, Flowers and Fruits of Apple circRNA
Source: Genes (Basel). 2022 Apr 18;13(4):712. doi: 10.3390/genes13040712 (PMC9030095; doi:10.3390/genes13040712)
Supplement: Supplementary file 1 [file genes-13-00712-s001.zip › Table S2.xlsx]

## Sheet: Sheet1
Table S2 Comparison results of clean data to reference genome
Sample_ID	Total Reads	Mapped Reads	Uniq Map Reads	Multiple Map Reads
Flower-1	131182226	130490352（99.47%）	123,912,484(94.46%)	6,577,868(5.01%)
Flower-2	120951496	120517250（99.64%）	114,522,854(94.68%)	5,994,396(4.96%)
Flower-3	130886824	130672830（99.84%）	124,396,391(95.04%)	6,276,439(4.80%)
Phloem-1	181414950	180892942（99.71%）	167,159,695(92.14%)	13,733,247(7.57%)
Phloem-2	136371318	136063040（99.77%）	120,869,599(88.63%)	15,193,441(11.14%)
Phloem-3	110002720	108704712（98.82%）	100,117,535(91.01%)	8,587,177(7.81%)
Leaf-1	108646390	108473944（99.84%）	103,170,343(94.96%)	5,303,601(4.88%)
Leaf-2	152463838	152294258（99.89%）	146,271,078(95.94%)	6,023,180(3.95%)
Leaf-3	175174812	174937170（99.86%）	168,274,713(96.06%)	6,662,457(3.80%)
Root-1	135883994	132182966（97.28%）	118,789,720(87.42%)	13,393,246(9.86%)
Root-2	145515592	140268248（96.39%）	128,225,048(88.12%)	12,043,200(8.28%)
Root-3	162146546	158665742（97.85%）	139,190,233(85.84%)	19,475,509(12.01%)
Fruit-1	150626022	150318112（99.80%）	143,699,247(95.40%)	6,618,865(4.39%)
Fruit-2	138852708	138361406（99.65%）	132,374,450(95.33%)	5,986,956(4.31%)
Fruit-3	149649772	149387246（99.82%）	124,705,990(83.33%)	24,681,256(16.49%)
