# Supplementary material for: Expression Characteristics in Roots, Phloem, Leaves, Flowers and Fruits of Apple circRNA
Source: Genes (Basel). 2022 Apr 18;13(4):712. doi: 10.3390/genes13040712 (PMC9030095; doi:10.3390/genes13040712)
Supplement: Supplementary file 1 [file genes-13-00712-s001.zip › Table S3.xlsx]

## Sheet: Sheet1
Table S3 Evaluation of sequencing data
Sample_ID	ReadSum	BaseSum	Ratio of mapped reads（%）	GC(%)	Q30(%)
Flower-1	65591113	19599396348	99.47	45.8	94.85
Flower-2	60475748	18074290002	99.64	45.73	92.56
Flower-3	65443412	19536631562	99.84	45.88	95.48
Phloem-1	90707475	27117426764	99.71	45.65	95.37
Phloem-2	68185659	20388235722	99.77	46.53	95.57
Phloem-3	55001360	16431445340	98.82	46.29	95.32
Leaf-1	54323195	16246525664	99.84	44.73	95.48
Leaf-2	76231919	22820656720	99.89	44.08	95.22
Leaf-3	87587406	26195372526	99.86	44.24	95.65
Root-1	67941997	20317613054	97.28	46.08	95.65
Root-2	72757796	21772785288	96.39	46.77	95.48
Root-3	81073273	24225178790	97.85	47.32	95.41
Fruit-1	75313011	22560582496	99.8	45.94	91.99
Fruit-2	69426354	20797224280	99.65	46.05	92.02
Fruit-3	74824886	22416222250	99.82	48.75	91.99
