# Supplementary material for: Expression Characteristics in Roots, Phloem, Leaves, Flowers and Fruits of Apple circRNA
Source: Genes (Basel). 2022 Apr 18;13(4):712. doi: 10.3390/genes13040712 (PMC9030095; doi:10.3390/genes13040712)
Supplement: Supplementary file 1 [file genes-13-00712-s001.zip › Table S4.xlsx]

## Sheet: Sheet1
Table S4 Number and proportion on chromosomes of circRNAs identified
Chromosomes	No.of circRNAs	Ratio of circRNAs
Chr00	165	0.0255458
Chr01	299	0.046292
Chr02	483	0.0747794
Chr03	403	0.0623936
Chr04	355	0.0549621
Chr05	475	0.0735408
Chr06	287	0.0444341
Chr07	353	0.0546524
Chr08	321	0.0496981
Chr09	371	0.0574392
Chr10	412	0.063787
Chr11	425	0.0657997
Chr12	340	0.0526397
Chr13	292	0.0452082
Chr14	272	0.0421118
Chr15	517	0.0800434
Chr16	344	0.053259
Chr17	381	0.0589875
