# Supplementary material for: Expression Characteristics in Roots, Phloem, Leaves, Flowers and Fruits of Apple circRNA
Source: Genes (Basel). 2022 Apr 18;13(4):712. doi: 10.3390/genes13040712 (PMC9030095; doi:10.3390/genes13040712)
Supplement: Supplementary file 1 [file genes-13-00712-s001.zip › Table S5.xlsx]

## Sheet: sheet1
Table S5 Expression of circRNAs in different tissues
New_ID	circRNA_ID	Flower	Phloem	Leaf	Root	Fruit	geneLength	gene_id
MD00G1000600_1	Chr00:102227|103004	0	0	1280.38	0	0	219	MD00G1000600
MD00G1055200_1	Chr00:10320213|10320890	190.642	0	0	0	0	596	MD00G1055200
MD00G1007700_1	Chr00:1034016|1034174	0	0	0	470.113	0	158	MD00G1007700
MD00G1055300_1	Chr00:10344721|10349918	0	131.004	0	0	0	1086	MD00G1055300
MD00G1007700_2	Chr00:1034769|1035448	0	0	412.357	0	0	680	MD00G1007700
MD00G1055800_1	Chr00:10468996|10469182	0	0	0	283.344	0	187	MD00G1055800
n/a_2	Chr00:1064842|1065025	756.355	0	0	0	0	183	n/a
n/a_23	Chr00:10720251|10720444	752.446	0	0	0	0	193	n/a
MD00G1058900_1	Chr00:10720729|10720977	0	344.568	0	0	0	248	MD00G1058900
MD00G1058900_2	Chr00:10722612|10722846	0	0	0	0	347.017	234	MD00G1058900
MD00G1060900_1	Chr00:11239729|11239882	0	372.344	0	0	0	153	MD00G1060900
n/a_24	Chr00:11246645|11254759	0	0	28.1129	0	0	8114	n/a
MD00G1061700_1	Chr00:11426737|11427329	0	0	0	0	2287.17	366	MD00G1061700
MD00G1063900_1	Chr00:11970919|11971610	0	0	0	142.052	319.397	373	MD00G1063900
MD00G1063900_2	Chr00:11971998|11972293	0	0	0	0	207.708	295	MD00G1063900
MD00G1063900_3	Chr00:11973185|11973770	0	172.947	0	0	0	447	MD00G1063900
MD00G1063900_4	Chr00:11973702|11974168	0	345.264	0	0	0	165	MD00G1063900
MD00G1064100_1	Chr00:12057683|12058611	144.009	192.415	314.01	188.284	924.764	789	MD00G1064100
MD00G1009800_1	Chr00:1220059|1220436	0	0	0	197.024	0	377	MD00G1009800
MD00G1066300_1	Chr00:12765930|12766152	0	0	411.005	0	0	222	MD00G1066300
MD00G1066600_1	Chr00:12851770|12851984	0	361.25	0	0	0	214	MD00G1066600
MD00G1067900_1	Chr00:13259211|13259372	0	0	0	329.102	0	161	MD00G1067900
MD00G1068600_1	Chr00:13454960|13455880	0	0	370.889	0	0	334	MD00G1068600
MD00G1070400_1	Chr00:13699944|13700103	0	358.293	0	0	0	159	MD00G1070400
n/a_3	Chr00:1459128|1469309	0	0	0	5.20434	0	10181	n/a
n/a_4	Chr00:1459640|1469268	0	13.9464	0	0	0	9628	n/a
MD00G1076300_1	Chr00:15352536|15352686	0	0	0	1756	0	150	MD00G1076300
MD00G1076400_1	Chr00:15360704|15361191	0	0	304.144	0	0	300	MD00G1076400
MD00G1078400_1	Chr00:15611952|15612116	0	578.333	0	0	0	164	MD00G1078400
MD00G1078900_1	Chr00:15875653|15877593	0	58.7305	0	0	0	1940	MD00G1078900
MD00G1078900_2	Chr00:15879899|15882585	0	0	0	373.137	0	497	MD00G1078900
MD00G1083700_1	Chr00:16667445|16669162	175.389	0	0	0	0	828	MD00G1083700
MD00G1084600_1	Chr00:16961099|16961276	0	803.785	0	0	0	177	MD00G1084600
MD00G1085100_1	Chr00:17087928|17088581	454.492	0	0	0	0	250	MD00G1085100
MD00G1085500_1	Chr00:17154095|17155294	0	0	0	380.406	0	503	MD00G1085500
MD00G1085500_2	Chr00:17156297|17156676	339.701	965.425	0	0	0	285	MD00G1085500
MD00G1000800_1	Chr00:173445|176505	0	0	0	159.636	438.069	550	MD00G1000800
MD00G1085900_1	Chr00:17355852|17358532	0	0	0	0	176.235	676	MD00G1085900
MD00G1086100_1	Chr00:17512421|17512749	0	0	0	178.455	0	328	MD00G1086100
MD00G1087700_1	Chr00:17808320|17808493	1066.77	0	0	0	0	173	MD00G1087700
MD00G1088600_1	Chr00:18116261|18116525	0	0	0	0	386.802	154	MD00G1088600
MD00G1089100_1	Chr00:18279929|18280100	0	0	1600.76	0	0	171	MD00G1089100
MD00G1089600_1	Chr00:18497750|18497914	0	347.37	0	0	0	164	MD00G1089600
MD00G1089600_2	Chr00:18497829|18498206	0	0	0	250.142	0	234	MD00G1089600
MD00G1089700_1	Chr00:18514448|18515153	430.39	0	0	0	0	264	MD00G1089700
MD00G1090900_1	Chr00:18744403|18744580	546.976	0	0	0	0	177	MD00G1090900
MD00G1091800_1	Chr00:19234229|19235805	3604.5	253.57	2586.4	905.903	417.713	337	MD00G1091800
MD00G1091800_2	Chr00:19234229|19236745	0	0	96.9303	0	0	1278	MD00G1091800
MD00G1091800_3	Chr00:19234229|19245366	0	0	217.246	0	387.858	630	MD00G1091800
MD00G1091800_4	Chr00:19235211|19245366	165.779	0	0	0	0	584	MD00G1091800
MD00G1091800_5	Chr00:19242721|19245366	1901.09	2141.98	1201.31	4120.93	2303.1	293	MD00G1091800
n/a_25	Chr00:19490215|19490389	0	545.095	0	0	0	174	n/a
MD00G1093300_1	Chr00:19608607|19608959	0	0	0	235.491	0	225	MD00G1093300
MD00G1095300_1	Chr00:19918701|19918854	0	0	0	0	530.731	153	MD00G1095300
MD00G1096900_1	Chr00:20353945|20355563	0	0	0	55.5986	0	953	MD00G1096900
MD00G1098400_1	Chr00:20510713|20511399	0	0	180.579	0	0	686	MD00G1098400
MD00G1102700_1	Chr00:21636678|21636945	0	0	0	0	780.847	267	MD00G1102700
MD00G1105000_1	Chr00:21988167|21988415	372.078	0	0	0	0	248	MD00G1105000
MD00G1105000_2	Chr00:21988187|21988372	523.323	0	0	0	0	185	MD00G1105000
MD00G1107100_1	Chr00:22454501|22456731	0	0	162.364	0	0	1727	MD00G1107100
MD00G1107200_1	Chr00:22465235|22466808	0	195.158	0	0	0	486	MD00G1107200
MD00G1107800_1	Chr00:22535335|22535728	246.348	0	0	0	0	393	MD00G1107800
MD00G1108000_1	Chr00:22634342|22637236	44.0665	0	0	0	0	2094	MD00G1108000
MD00G1109200_1	Chr00:22915021|22915198	641.937	0	0	0	0	177	MD00G1109200
MD00G1110400_1	Chr00:23083759|23084662	0	0	382.281	0	0	489	MD00G1110400
MD00G1110500_1	Chr00:23087153|23087990	0	0	109.012	0	0	837	MD00G1110500
MD00G1111900_1	Chr00:23585185|23585379	475.646	0	0	0	0	194	MD00G1111900
n/a_5	Chr00:2400097|2400256	0	486.21	0	0	0	159	n/a
MD00G1016700_1	Chr00:2412082|2412712	0	327.574	0	0	0	236	MD00G1016700
MD00G1113700_1	Chr00:24122593|24122773	0	429.486	0	0	0	180	MD00G1113700
MD00G1016700_2	Chr00:2412708|2413737	0	0	0	113.657	0	1030	MD00G1016700
MD00G1114500_1	Chr00:24292829|24295657	0	0	0	70.5024	0	2412	MD00G1114500
n/a_26	Chr00:24295639|24322183	0	0	3.43743	0	0	26544	n/a
MD00G1114600_1	Chr00:24319288|24321676	0	0	80.7542	0	0	2301	MD00G1114600
n/a_27	Chr00:24663551|24663829	0	0	672.429	0	0	278	n/a
MD00G1017300_1	Chr00:2504853|2505059	0	276.547	0	426.213	0	206	MD00G1017300
MD00G1118600_1	Chr00:25338038|25338259	438.076	0	0	0	0	221	MD00G1118600
MD00G1125400_1	Chr00:26717998|26718682	0	0	0	0	290.007	420	MD00G1125400
MD00G1126900_1	Chr00:26929838|26930192	0	0	1056.13	0	0	354	MD00G1126900
MD00G1129200_1	Chr00:27493216|27495066	0	0	0	0	157.98	514	MD00G1129200
MD00G1131600_1	Chr00:28270199|28270992	526.686	264.752	840.872	0	0	438	MD00G1131600
MD00G1001400_1	Chr00:286887|289652	0	0	0	0	80.412	762	MD00G1001400
MD00G1001400_2	Chr00:290811|291414	160.555	0	0	0	0	603	MD00G1001400
MD00G1001400_3	Chr00:290979|291252	0	0	0	0	224.447	273	MD00G1001400
MD00G1138200_1	Chr00:29898191|29898378	0	826.818	0	0	0	187	MD00G1138200
MD00G1018600_1	Chr00:3145137|3146084	0	474.738	0	0	0	180	MD00G1018600
n/a_6	Chr00:3199539|3206091	0	0	0	893.603	0	6552	n/a
MD00G1148100_1	Chr00:32474642|32475592	0	0	200.773	0	0	617	MD00G1148100
MD00G1148100_2	Chr00:32475220|32478651	0	190.658	0	220.22	82.0267	747	MD00G1148100
MD00G1148100_3	Chr00:32476084|32478651	0	193.17	0	0	0	491	MD00G1148100
MD00G1148100_4	Chr00:32478728|32479225	0	2354.37	0	750.425	858.56	273	MD00G1148100
MD00G1148100_5	Chr00:32478728|32479851	0	1269.13	847.779	1371.49	386.742	441	MD00G1148100
MD00G1148100_6	Chr00:32478728|32482541	0	0	0	0	109.028	562	MD00G1148100
MD00G1148100_7	Chr00:32478728|32483403	0	107.371	0	73.5909	0	720	MD00G1148100
MD00G1148100_8	Chr00:32478728|32484503	0	0	0	64.9282	0	1144	MD00G1148100
MD00G1148100_9	Chr00:32482420|32484962	0	0	0	0	165.862	859	MD00G1148100
MD00G1148300_1	Chr00:32535220|32535727	0	0	0	0	240.955	337	MD00G1148300
MD00G1149200_1	Chr00:32823315|32823673	0	0	0	414.96	256.734	358	MD00G1149200
MD00G1149200_2	Chr00:32823315|32824886	0	66.0889	0	92.202	71.0835	862	MD00G1149200
MD00G1149200_3	Chr00:32825681|32826066	0	0	0	190.662	0	307	MD00G1149200
MD00G1149500_1	Chr00:32911083|32911996	582.681	0	0	0	0	390	MD00G1149500
n/a_28	Chr00:33378671|33379642	0	0	385.037	0	0	971	n/a
MD00G1156200_1	Chr00:34420898|34421075	521.33	0	0	0	0	177	MD00G1156200
MD00G1156500_1	Chr00:34435344|34435575	0	0	0	321.549	0	231	MD00G1156500
MD00G1157400_1	Chr00:34804571|34804792	0	0	0	0	277.258	221	MD00G1157400
MD00G1159300_1	Chr00:35185831|35186209	0	0	0	0	324.201	378	MD00G1159300
MD00G1159900_1	Chr00:35391897|35392189	0	0	640.19	0	0	292	MD00G1159900
MD00G1161300_1	Chr00:35862373|35863995	0	0	0	0	119.676	512	MD00G1161300
MD00G1019700_1	Chr00:3617677|3622150	0	0	0	0	66.1792	1227	MD00G1019700
MD00G1019700_2	Chr00:3622680|3624923	165.665	0	0	0	0	557	MD00G1019700
n/a_7	Chr00:3698238|3759148	0	6.91419	0	6.70708	0	60910	n/a
n/a_8	Chr00:3729441|3801295	43.5791	0	0	21.1915	0	71854	n/a
n/a_9	Chr00:3729762|3736072	0	0	0	0	19.4212	6310	n/a
n/a_10	Chr00:3731398|3734758	0	0	36.8681	0	0	3360	n/a
n/a_11	Chr00:3731398|3803321	3.94946	0	0	0	0	71923	n/a
MD00G1020700_1	Chr00:3732231|3732444	0	0	581.582	0	0	213	MD00G1020700
MD00G1020700_2	Chr00:3733245|3733458	0	445.289	0	0	0	213	MD00G1020700
MD00G1020700_3	Chr00:3733296|3733509	0	0	428.372	0	0	213	MD00G1020700
MD00G1169600_1	Chr00:38982278|38983310	0	83.2875	0	0	0	684	MD00G1169600
MD00G1170900_1	Chr00:39313551|39313734	0	0	747.895	0	0	183	MD00G1170900
MD00G1171900_1	Chr00:39528458|39529091	0	0	0	122.454	0	478	MD00G1171900
MD00G1171900_2	Chr00:39530135|39530310	0	0	0	0	350.137	175	MD00G1171900
MD00G1024700_1	Chr00:4002513|4005321	0	376.713	0	0	0	403	MD00G1024700
MD00G1176300_1	Chr00:40809289|40809621	0	0	412.243	0	0	332	MD00G1176300
MD00G1178300_1	Chr00:41606732|41606956	432.209	0	0	0	0	224	MD00G1178300
MD00G1181800_1	Chr00:42827476|42830904	0	24.9279	0	0	0	3428	MD00G1181800
MD00G1025800_1	Chr00:4458460|4458649	768.371	0	0	0	0	189	MD00G1025800
n/a_12	Chr00:4463124|4512033	2.83001	0	17.1995	0	0	48909	n/a
MD00G1191800_1	Chr00:46496424|46497534	0	0	301.404	0	0	411	MD00G1191800
MD00G1191800_2	Chr00:46496447|46497534	0	0	319.27	0	0	388	MD00G1191800
MD00G1030000_1	Chr00:4854144|4857839	0	0	105.119	0	0	868	MD00G1030000
MD00G1207300_1	Chr00:50458685|50459044	0	322.464	0	0	0	265	MD00G1207300
MD00G1214200_1	Chr00:51075492|51077957	0	0	194.043	0	0	1596	MD00G1214200
MD00G1031100_1	Chr00:5176680|5181619	0	0	0	42.7622	0	1737	MD00G1031100
MD00G1031700_1	Chr00:5528738|5528892	0	369.926	0	0	0	154	MD00G1031700
MD00G1034800_1	Chr00:6077902|6080422	218.543	0	0	0	0	443	MD00G1034800
MD00G1034800_2	Chr00:6077902|6080456	0	0	0	0	170.235	477	MD00G1034800
MD00G1034800_3	Chr00:6078467|6078810	0	0	0	154.476	0	343	MD00G1034800
MD00G1034800_4	Chr00:6078704|6080456	0	0	0	274.426	226.382	406	MD00G1034800
MD00G1035400_1	Chr00:6188363|6189544	252.809	0	0	0	83.9369	730	MD00G1035400
n/a_13	Chr00:6450597|6450832	0	0	0	338.205	0	235	n/a
MD00G1037100_1	Chr00:6584107|6584306	0	572.549	0	0	0	199	MD00G1037100
n/a_14	Chr00:6592846|6593004	584.021	0	0	0	0	158	n/a
n/a_15	Chr00:6748205|6748381	0	0	0	422.033	0	176	n/a
n/a_16	Chr00:6748215|6748474	658.048	0	0	0	0	259	n/a
n/a_17	Chr00:6748225|6748456	0	821.183	0	0	0	231	n/a
n/a_18	Chr00:6748243|6748474	0	0	0	0	257.868	231	n/a
MD00G1039200_1	Chr00:6748729|6749665	0	0	398.238	84.9125	190.921	936	MD00G1039200
n/a_19	Chr00:6748729|6751911	30.4257	0	0	0	0	3182	n/a
MD00G1039200_2	Chr00:6749005|6749161	728.352	0	0	0	0	156	MD00G1039200
MD00G1039200_3	Chr00:6749365|6750393	0	0	0	335.025	196.54	1028	MD00G1039200
n/a_20	Chr00:6753456|6753629	0	0	0	0	469.375	173	n/a
n/a_21	Chr00:6754478|6754661	0	0	0	0	665.589	183	n/a
n/a_22	Chr00:6754497|6754687	897.023	599.67	0	0	0	190	n/a
MD00G1040500_1	Chr00:6917895|6918099	452.33	0	0	0	0	204	MD00G1040500
MD00G1040500_2	Chr00:6917997|6918231	0	0	389.928	0	0	234	MD00G1040500
MD00G1041900_1	Chr00:7638284|7643895	0	0	100.713	0	0	1845	MD00G1041900
n/a_1	Chr00:814895|824208	0	0	0	0	200.672	9313	n/a
MD00G1005700_1	Chr00:815745|815924	515.505	0	0	0	0	179	MD00G1005700
MD00G1050200_1	Chr00:9542010|9542337	0	0	353.656	0	0	258	MD00G1050200
MD00G1050700_1	Chr00:9597093|9598994	0	0	0	0	277.942	545	MD00G1050700
MD00G1050700_2	Chr00:9597253|9598994	0	0	0	0	126.47	471	MD00G1050700
MD00G1051300_1	Chr00:9677591|9679012	0	161.731	0	0	0	717	MD00G1051300
MD00G1006900_1	Chr00:981856|983693	0	146.416	0	0	0	1056	MD00G1006900
MD00G1053300_1	Chr00:9952391|9955228	0	0	389.55	0	0	318	MD00G1053300
MD01G1028100_1	Chr01:10457975|10458158	0	0	0	1014.73	0	183	MD01G1028100
MD01G1028300_1	Chr01:10494187|10494356	0	335.11	0	0	0	170	MD01G1028300
MD01G1031100_1	Chr01:10915541|10916629	0	3268.73	0	449.029	389.453	236	MD01G1031100
MD01G1031200_1	Chr01:10949504|10953188	0	0	0	0	156.577	587	MD01G1031200
MD01G1034300_1	Chr01:11709586|11709901	0	245.42	0	0	0	315	MD01G1034300
MD01G1035300_1	Chr01:11968060|11968210	0	0	608.288	0	0	150	MD01G1035300
MD01G1035600_1	Chr01:12019605|12019902	0	0	0	0	206.31	297	MD01G1035600
MD01G1036200_1	Chr01:12168121|12168275	0	554.889	0	0	0	154	MD01G1036200
MD01G1036200_2	Chr01:12168121|12168298	0	321.857	0	0	0	177	MD01G1036200
MD01G1036200_3	Chr01:12168815|12168977	0	0	0	0	378.234	162	MD01G1036200
MD01G1036200_4	Chr01:12169510|12170549	0	0	0	94.1126	0	563	MD01G1036200
MD01G1036500_1	Chr01:12254575|12256478	0	2030.55	656.682	1534.62	358.747	427	MD01G1036500
MD01G1036500_2	Chr01:12254575|12257385	281.282	0	0	79.9634	125.561	732	MD01G1036500
MD01G1037000_1	Chr01:12395894|12396272	0	290.629	0	0	0	266	MD01G1037000
MD01G1004100_1	Chr01:1332218|1333619	0	0	152.326	0	0	599	MD01G1004100
MD01G1038800_1	Chr01:13454860|13457141	0	188.862	0	0	0	614	MD01G1038800
MD01G1044100_1	Chr01:14342422|14343419	0	0	333.004	0	0	411	MD01G1044100
MD01G1044400_1	Chr01:14397131|14397852	127.982	0	0	73.4888	0	721	MD01G1044400
MD01G1044900_1	Chr01:14444912|14445065	0	0	0	382.57	0	153	MD01G1044900
MD01G1044900_2	Chr01:14446211|14446388	521.33	0	0	0	0	177	MD01G1044900
MD01G1045300_1	Chr01:14546523|14547364	0	125.499	0	0	0	616	MD01G1045300
MD01G1045900_1	Chr01:14675430|14675596	0	0	0	0	553.68	166	MD01G1045900
n/a_30	Chr01:14680136|14684684	62.4576	31.2819	30.0934	86.3641	26.5702	4548	n/a
n/a_31	Chr01:14682124|14684994	65.885	0	0	18.4618	101.828	2870	n/a
MD01G1046400_1	Chr01:14739857|14740019	0	0	0	1146.26	0	162	MD01G1046400
MD01G1046700_1	Chr01:14779835|14780273	0	0	0	0	235.368	345	MD01G1046700
MD01G1048800_1	Chr01:15174573|15174857	0	0	0	0	531.852	168	MD01G1048800
MD01G1049200_1	Chr01:15197490|15197704	0	0	9178.42	0	0	130	MD01G1049200
MD01G1051100_1	Chr01:15473843|15475490	0	0	0	208.88	0	889	MD01G1051100
MD01G1051100_2	Chr01:15474650|15474807	0	360.561	0	0	0	158	MD01G1051100
MD01G1051100_3	Chr01:15474650|15474997	0	0	482.011	0	0	257	MD01G1051100
MD01G1051100_4	Chr01:15477243|15477416	533.383	0	0	0	0	173	MD01G1051100
n/a_32	Chr01:16171091|16204711	0	0	0	4.57335	0	33620	n/a
MD01G1056600_1	Chr01:16171820|16171970	0	0	0	529.854	0	150	MD01G1056600
n/a_33	Chr01:16266348|16285402	21.7927	27.3857	19.1546	9.74571	11.0819	19054	n/a
n/a_34	Chr01:16284829|16295955	81.3205	0	11.134	0	34.528	11126	n/a
MD01G1059300_1	Chr01:16305919|16306607	0	0	255.583	0	0	357	MD01G1059300
MD01G1060600_1	Chr01:16420579|16420774	0	0	635.266	0	0	195	MD01G1060600
n/a_35	Chr01:16598635|16615159	0	0	0	16.0749	0	16524	n/a
n/a_36	Chr01:16604061|16636641	14.3833	24.6571	59.2326	5.5325	0	32580	n/a
n/a_37	Chr01:16619804|16651910	0	0	0	10.4108	0	32106	n/a
n/a_38	Chr01:16619915|16651894	0	0	3.8737	11.8974	0	31979	n/a
n/a_39	Chr01:16628566|16665077	0	1.56031	0	0	0	36511	n/a
n/a_40	Chr01:16726071|16816501	0	0	0	0.821386	0	90430	n/a
MD01G1065000_1	Chr01:16884515|16885857	73.2926	0	0	0	0	1259	MD01G1065000
MD01G1065800_1	Chr01:16971280|16971744	0	249.379	0	0	0	465	MD01G1065800
MD01G1066500_1	Chr01:17026173|17027454	0	0	0	0	66.1706	926	MD01G1066500
MD01G1066500_2	Chr01:17026882|17027454	0	0	0	0	964.809	474	MD01G1066500
MD01G1068300_1	Chr01:17224471|17224654	0	0	0	0	1000.42	183	MD01G1068300
MD01G1069200_1	Chr01:17324650|17324805	1099.58	0	0	0	0	155	MD01G1069200
MD01G1069400_1	Chr01:17348683|17349390	0	80.578	0	0	0	707	MD01G1069400
MD01G1069600_1	Chr01:17367623|17370893	0	60.7286	0	0	0	1273	MD01G1069600
MD01G1070000_1	Chr01:17416240|17416793	0	0	338.039	0	0	553	MD01G1070000
MD01G1071200_1	Chr01:17589287|17590101	0	0	0	361.264	0	220	MD01G1071200
MD01G1072500_1	Chr01:17776851|17777296	0	0	0	0	189.703	323	MD01G1072500
MD01G1072600_1	Chr01:17783278|17785127	229.541	0	0	0	0	804	MD01G1072600
MD01G1072900_1	Chr01:17806397|17806557	0	0	570.27	0	0	160	MD01G1072900
MD01G1073000_1	Chr01:17815279|17815524	0	0	0	303.175	0	245	MD01G1073000
MD01G1073100_1	Chr01:17822103|17822310	0	0	0	0	287.766	207	MD01G1073100
MD01G1073500_1	Chr01:17893304|17893459	0	0	0	339.65	0	156	MD01G1073500
MD01G1073600_1	Chr01:17915859|17916024	0	0	0	0	738.199	165	MD01G1073600
MD01G1073600_2	Chr01:17915979|17916159	537.86	0	0	0	0	180	MD01G1073600
MD01G1073600_3	Chr01:17915979|17916167	0	0	0	0	325.925	188	MD01G1073600
MD01G1073600_4	Chr01:17917189|17917348	580.348	0	779.1	0	12523.8	159	MD01G1073600
MD01G1073600_5	Chr01:17917212|17917371	1798.14	0	573.856	0	11216.2	159	MD01G1073600
MD01G1074300_1	Chr01:18037994|18038719	0	0	0	0	84.5158	725	MD01G1074300
n/a_41	Chr01:18439238|18443002	0	811.276	0	0	0	3764	n/a
n/a_42	Chr01:18439726|18444400	3672.78	3317.62	1092.38	874.75	4643.63	4674	n/a
n/a_43	Chr01:18439744|18444400	0	49.3768	0	80.5018	0	4656	n/a
n/a_44	Chr01:18439786|18444715	57.6298	297.644	56.8884	121.252	265.133	4929	n/a
MD01G1078900_1	Chr01:18592445|18592683	0	0	785.443	0	0	238	MD01G1078900
MD01G1079300_1	Chr01:18655725|18656358	0	0	0	132.796	0	399	MD01G1079300
MD01G1079500_1	Chr01:18678818|18678995	0	0	0	446.506	0	178	MD01G1079500
n/a_45	Chr01:18702376|18721108	0	0	0	3.12477	0	18732	n/a
MD01G1080500_1	Chr01:18779397|18779788	247.608	0	0	0	0	391	MD01G1080500
MD01G1082200_1	Chr01:18864798|18864988	0	0	480.227	0	0	190	MD01G1082200
MD01G1082300_1	Chr01:18882826|18887278	102.64	0	0	0	0	2214	MD01G1082300
MD01G1083400_1	Chr01:18987139|18987443	0	254.301	0	0	0	304	MD01G1083400
MD01G1083800_1	Chr01:19020886|19021044	919.127	0	0	0	0	158	MD01G1083800
MD01G1083800_2	Chr01:19021228|19021447	0	0	565.648	0	0	219	MD01G1083800
MD01G1083800_3	Chr01:19022217|19022372	0	0	0	341.841	0	155	MD01G1083800
n/a_46	Chr01:19181779|19184872	0	0	29.4999	0	0	3093	n/a
Apple_newGene_776_1	Chr01:19280023|19280206	0	633.668	0	0	0	183	Apple_newGene_776
MD01G1087600_1	Chr01:19699645|19700782	0	169.571	0	0	0	839	MD01G1087600
n/a_47	Chr01:20443264|20443646	253.442	0	0	0	0	382	n/a
MD01G1090900_1	Chr01:20584682|20584832	0	0	0	495.186	0	150	MD01G1090900
n/a_48	Chr01:20689523|20694912	0	15.8569	0	0	0	5389	n/a
n/a_49	Chr01:20690040|20706016	5.77587	0	0	0	0	15976	n/a
n/a_50	Chr01:20773826|20845894	2.36491	0	5.15688	0.735214	0	72068	n/a
n/a_51	Chr01:20780434|20826822	1.98921	2.49981	1.96696	2.40185	0	46388	n/a
n/a_52	Chr01:20780434|20878427	0	1.16271	0	0	0	97993	n/a
n/a_53	Chr01:20781321|20827613	0	38.6693	43.4018	29.7806	0	46292	n/a
n/a_54	Chr01:20782434|20828279	0	0	0	4.05049	0	45845	n/a
n/a_55	Chr01:20845756|20853016	0	0	0	66.5022	0	7260	n/a
n/a_56	Chr01:20879273|20902545	9.9127	18.4669	9.24373	2.51518	0	23272	n/a
MD01G1094400_1	Chr01:20917074|20917362	0	989.039	0	0	0	288	MD01G1094400
n/a_57	Chr01:20984385|21020443	73.7036	37.1267	124.216	9.55142	24.2851	36058	n/a
n/a_58	Chr01:20984999|21020967	51.0997	122.777	21.5627	129.373	24.1581	35968	n/a
n/a_59	Chr01:20986934|21022536	0	0	0	0	5.85602	35602	n/a
n/a_60	Chr01:21162287|21214009	4.06863	28.9368	10.0824	9.90442	10.5322	51722	n/a
MD01G1100600_1	Chr01:21374299|21376999	0	0	45.8804	0	0	2700	MD01G1100600
n/a_61	Chr01:21417829|21424904	0	8.0521	0	0	0	7075	n/a
MD01G1101700_1	Chr01:21449560|21450051	0	0	335.453	0	0	408	MD01G1101700
MD01G1102600_1	Chr01:21486385|21486665	0	0	0	0	290.007	280	MD01G1102600
MD01G1102600_2	Chr01:21486831|21487142	296.705	0	0	0	0	311	MD01G1102600
MD01G1102600_3	Chr01:21489219|21489416	0	0	463.163	0	0	197	MD01G1102600
MD01G1103100_1	Chr01:21509724|21511313	0	0	0	0	193.293	317	MD01G1103100
MD01G1103500_1	Chr01:21578656|21578821	0	0	0	0	361.015	165	MD01G1103500
MD01G1104700_1	Chr01:21792592|21792824	0	0	393.289	0	0	232	MD01G1104700
MD01G1106900_1	Chr01:21974178|21974438	0	0	0	225.128	0	260	MD01G1106900
MD01G1107300_1	Chr01:22026391|22026596	0	0	0	387.698	0	205	MD01G1107300
MD01G1108000_1	Chr01:22083946|22084206	0	0	0	203.79	235.669	260	MD01G1108000
MD01G1108000_2	Chr01:22085555|22085979	267.978	0	0	0	0	424	MD01G1108000
MD01G1108500_1	Chr01:22141933|22143058	593.955	0	0	0	0	326	MD01G1108500
MD01G1108700_1	Chr01:22157966|22158146	631.238	0	0	0	0	180	MD01G1108700
n/a_62	Chr01:22188540|22195146	0	0	28.1283	0	0	6606	n/a
MD01G1109700_1	Chr01:22233533|22234041	0	198.734	0	0	0	389	MD01G1109700
MD01G1110100_1	Chr01:22284076|22284354	0	0	0	0	512.503	278	MD01G1110100
MD01G1110100_2	Chr01:22284113|22284306	0	0	0	0	317.482	193	MD01G1110100
MD01G1110100_3	Chr01:22284991|22285641	0	0	0	0	153.791	528	MD01G1110100
MD01G1110400_1	Chr01:22310796|22310946	2490.94	948.466	1246.24	0	0	150	MD01G1110400
MD01G1110800_1	Chr01:22350227|22351088	0	0	0	61.5394	0	861	MD01G1110800
MD01G1111300_1	Chr01:22385997|22386306	0	0	295.285	0	0	309	MD01G1111300
MD01G1113000_1	Chr01:22698835|22699027	0	0	645.192	0	0	192	MD01G1113000
MD01G1113500_1	Chr01:22767115|22768910	0	0	0	138.705	0	382	MD01G1113500
n/a_63	Chr01:22853416|22874056	0	623.483	0	380.077	87.7795	20640	n/a
n/a_64	Chr01:22950169|23000795	3.36654	0	11.0774	0	0	50626	n/a
MD01G1116700_1	Chr01:23035266|23037157	0	0	442.928	0	0	618	MD01G1116700
MD01G1116700_2	Chr01:23037609|23039049	192.255	0	0	0	0	591	MD01G1116700
MD01G1116700_3	Chr01:23037609|23039769	0	0	0	60.6935	0	873	MD01G1116700
n/a_65	Chr01:23040641|23086307	0	11.4299	30.0509	0	0	45666	n/a
MD01G1117200_1	Chr01:23099536|23100127	0	0	0	377.045	0	591	MD01G1117200
MD01G1117300_1	Chr01:23114263|23114563	0	0	0	444.012	0	179	MD01G1117300
n/a_66	Chr01:23157455|23211183	17.1745	0	0	2.76496	0	53728	n/a
MD01G1119600_1	Chr01:23340119|23340306	1035.45	0	0	0	0	187	MD01G1119600
n/a_67	Chr01:23467476|23491416	7.11923	34.2301	9.52832	5.76488	0	23940	n/a
MD01G1122800_1	Chr01:23589982|23590170	0	0	0	790.19	0	188	MD01G1122800
MD01G1124000_1	Chr01:23703788|23704310	0	0	0	0	176.075	522	MD01G1124000
MD01G1126500_1	Chr01:23822006|23822177	0	0	533.586	0	0	171	MD01G1126500
MD01G1133500_1	Chr01:24335407|24335642	0	0	388.269	0	0	235	MD01G1133500
MD01G1135400_1	Chr01:24459639|24460343	0	138.61	0	0	0	411	MD01G1135400
MD01G1135400_2	Chr01:24459639|24460348	0	273.231	0	0	0	417	MD01G1135400
MD01G1136700_1	Chr01:24595207|24595454	0	575.992	0	0	0	247	MD01G1136700
n/a_68	Chr01:24630212|24723522	6.7711	4.42608	4.40032	0	0	93310	n/a
MD01G1137300_1	Chr01:24637787|24637961	0	0	0	336.398	0	174	MD01G1137300
MD01G1138900_1	Chr01:24842835|24843378	339.872	0	0	0	0	543	MD01G1138900
MD01G1139200_1	Chr01:24888930|24889095	2278.25	813.794	0	450.169	0	165	MD01G1139200
MD01G1139500_1	Chr01:24919215|24919394	0	0	0	327.001	0	179	MD01G1139500
MD01G1141200_1	Chr01:25025437|25026420	0	0	0	0	76.5649	778	MD01G1141200
MD01G1144300_1	Chr01:25447595|25455514	0	0	0	6.69008	0	7920	MD01G1144300
MD01G1144400_1	Chr01:25478906|25479384	0	161.731	0	0	0	478	MD01G1144400
n/a_69	Chr01:25523071|25523271	0	0	0	0	297.837	200	n/a
MD01G1145200_1	Chr01:25531546|25531813	0	0	463.959	0	0	267	MD01G1145200
MD01G1147000_1	Chr01:25610683|25610964	0	0	0	0	866.924	281	MD01G1147000
MD01G1147200_1	Chr01:25633419|25634022	0	94.4753	0	0	0	603	MD01G1147200
MD01G1147200_2	Chr01:25634022|25634177	0	0	0	0	576.459	155	MD01G1147200
MD01G1147700_1	Chr01:25673935|25674257	0	0	0	0	252.18	322	MD01G1147700
n/a_70	Chr01:25874809|25921003	2.09583	2.05322	6.72841	1.26712	0	46194	n/a
n/a_71	Chr01:25914990|25925094	0	0	18.3903	0	0	10104	n/a
n/a_72	Chr01:25925720|25944272	6.12456	26.3114	10.0159	20.4409	0	18552	n/a
MD01G1152100_1	Chr01:26079430|26079945	0	0	0	0	507.512	320	MD01G1152100
MD01G1152500_1	Chr01:26109218|26110701	0	0	0	118.801	0	446	MD01G1152500
MD01G1152600_1	Chr01:26115235|26115573	272.199	0	0	0	0	339	MD01G1152600
MD01G1153300_1	Chr01:26156887|26157701	0	0	0	195.278	0	814	MD01G1153300
MD01G1153400_1	Chr01:26179250|26179453	0	0	0	0	301.842	203	MD01G1153400
MD01G1153400_2	Chr01:26180083|26180327	0	233.478	0	0	0	244	MD01G1153400
MD01G1154700_1	Chr01:26296434|26296754	0	178.027	0	0	0	320	MD01G1154700
MD01G1154700_2	Chr01:26302807|26303822	0	101.368	0	0	0	843	MD01G1154700
MD01G1155100_1	Chr01:26319600|26319825	0	253.194	0	0	0	225	MD01G1155100
n/a_73	Chr01:26607113|26612576	0	0	25.053	0	0	5463	n/a
MD01G1160800_1	Chr01:26633120|26633878	186.415	0	0	0	0	495	MD01G1160800
MD01G1161200_1	Chr01:26656091|26656336	695.65	0	0	0	0	245	MD01G1161200
n/a_74	Chr01:26714192|26723574	0	37.4178	0	75.3142	0	9382	n/a
n/a_75	Chr01:26714328|26723516	0	16.8279	0	0	0	9188	n/a
n/a_76	Chr01:26714596|26723984	14.7436	288.77	19.9122	87.651	0	9388	n/a
n/a_77	Chr01:26716254|26717346	0	347.423	459.558	0	0	1092	n/a
MD01G1162300_1	Chr01:26722819|26723161	0	166.575	0	0	0	342	MD01G1162300
MD01G1164000_1	Chr01:26869367|26869573	0	0	907.453	0	0	206	MD01G1164000
MD01G1165200_1	Chr01:26930912|26931077	0	345.264	0	0	0	165	MD01G1165200
MD01G1165200_2	Chr01:26930935|26931100	688.624	0	0	0	0	165	MD01G1165200
MD01G1165900_1	Chr01:26990117|26990971	0	0	213.95	0	0	579	MD01G1165900
MD01G1165900_2	Chr01:26990388|26991110	0	265.925	0	0	0	535	MD01G1165900
MD01G1168200_1	Chr01:27263370|27263657	0	0	1181.17	0	0	287	MD01G1168200
n/a_78	Chr01:27264419|27264635	0	0	0	0	551.551	216	n/a
n/a_79	Chr01:27381080|27387550	88.3396	234.551	81.6317	57.4018	9.47047	6470	n/a
n/a_80	Chr01:27382002|27388581	0	324.534	0	0	0	6579	n/a
MD01G1172900_1	Chr01:27482036|27482797	349.528	0	0	0	0	264	MD01G1172900
MD01G1173400_1	Chr01:27510806|27511033	0	505.277	0	0	0	153	MD01G1173400
MD01G1174400_1	Chr01:27558704|27558955	0	632.985	0	0	0	135	MD01G1174400
n/a_81	Chr01:27611226|27611419	0	0	0	0	317.482	193	n/a
n/a_82	Chr01:27753167|27753327	0	483.172	0	0	0	160	n/a
n/a_83	Chr01:27862338|27920944	0	2.63821	0	17.1678	1.04552	58606	n/a
n/a_84	Chr01:27862349|27920944	0	15.7988	0	84.4599	10.7762	58595	n/a
n/a_85	Chr01:27862387|27920944	0	1.32021	4.75056	8.25969	2.0928	58557	n/a
n/a_86	Chr01:27863191|27921821	0	0	0	0	9.29313	58630	n/a
n/a_87	Chr01:27863854|27921821	0	2.61899	0	2.88574	0	57967	n/a
n/a_88	Chr01:27864102|27921821	0	0	0	8.60257	0	57719	n/a
n/a_89	Chr01:27874126|27951720	0	0	0	1.91453	0	77594	n/a
n/a_90	Chr01:27955024|27993092	63.2818	86.7911	64.6545	73.2853	71.5455	38068	n/a
n/a_91	Chr01:27955214|27993150	0	0	0	0	62.0744	37936	n/a
MD01G1180600_1	Chr01:27992357|27992524	0	0	0	0	366.91	167	MD01G1180600
MD01G1182700_1	Chr01:28122587|28125270	84.7765	0	0	0	0	1142	MD01G1182700
n/a_92	Chr01:28303728|28375275	9.8151	26.2972	93.675	8.72638	3.66993	71547	n/a
MD01G1185700_1	Chr01:28465819|28466965	0	0	0	161.694	0	362	MD01G1185700
MD01G1185900_1	Chr01:28475457|28475719	433.675	0	0	0	0	262	MD01G1185900
MD01G1186100_1	Chr01:28485066|28485576	0	0	733.08	0	0	510	MD01G1186100
MD01G1186100_2	Chr01:28491715|28493015	0	0	0	124.379	0	426	MD01G1186100
MD01G1186200_1	Chr01:28505692|28505891	0	0	0	0	408.05	199	MD01G1186200
n/a_93	Chr01:28609776|28609952	0	323.685	0	0	0	176	n/a
MD01G1187600_1	Chr01:28611164|28611316	0	0	600.284	0	0	152	MD01G1187600
MD01G1187900_1	Chr01:28626080|28626237	0	0	0	946.215	0	157	MD01G1187900
n/a_94	Chr01:28802765|28882551	0	0	0	0	0.746591	79786	n/a
MD01G1189200_1	Chr01:28819791|28820118	0	0	0	179.001	0	327	MD01G1189200
MD01G1189200_2	Chr01:28822391|28823441	1534.1	892.219	1544.01	679.592	569.299	1050	MD01G1189200
MD01G1190700_1	Chr01:28924692|28925317	0	0	372.381	0	0	502	MD01G1190700
MD01G1191000_1	Chr01:28939674|28939912	0	974.464	0	0	0	238	MD01G1191000
MD01G1192300_1	Chr01:29163641|29164404	0	232.525	0	0	0	490	MD01G1192300
MD01G1192300_2	Chr01:29167669|29167826	0	0	0	674.973	0	157	MD01G1192300
n/a_95	Chr01:29260567|29271137	48.373	0	0	0	0	10570	n/a
n/a_96	Chr01:29260968|29272256	0	0	99.3632	0	0	11288	n/a
n/a_97	Chr01:29335419|29360019	3.75103	0	0	0	0	24600	n/a
MD01G1195200_1	Chr01:29360142|29360321	0	431.885	0	0	0	179	MD01G1195200
MD01G1195200_2	Chr01:29360152|29360303	641.157	0	0	0	0	151	MD01G1195200
MD01G1196700_1	Chr01:29459540|29459994	396.599	0	0	0	0	349	MD01G1196700
MD01G1196700_2	Chr01:29460967|29461225	0	367.622	0	0	0	258	MD01G1196700
MD01G1197200_1	Chr01:29540435|29541542	0	0	0	134.823	0	393	MD01G1197200
MD01G1198100_1	Chr01:29599841|29601713	73.6794	108.272	0	89.0916	0	1314	MD01G1198100
MD01G1200700_1	Chr01:29740029|29740194	0	468.53	0	0	0	165	MD01G1200700
MD01G1202100_1	Chr01:29807808|29808015	668.662	0	903.069	0	0	207	MD01G1202100
MD01G1203100_1	Chr01:29913377|29914514	0	0	0	118.536	0	447	MD01G1203100
MD01G1205000_1	Chr01:30043432|30044170	0	0	268.362	0	0	340	MD01G1205000
MD01G1205500_1	Chr01:30066570|30066971	0	0	0	132.133	0	401	MD01G1205500
MD01G1206300_1	Chr01:30165360|30165518	0	0	577.488	0	0	158	MD01G1206300
MD01G1206800_1	Chr01:30231769|30232286	0	0	0	0	118.518	517	MD01G1206800
MD01G1207000_1	Chr01:30242233|30242383	968.147	379.791	825.846	353.236	2345.43	150	MD01G1207000
MD01G1207000_2	Chr01:30242233|30242409	0	0	0	301.054	0	176	MD01G1207000
MD01G1207500_1	Chr01:30264440|30265929	0	0	206.806	0	0	599	MD01G1207500
MD01G1208700_1	Chr01:30317921|30318139	521.206	0	0	0	0	218	MD01G1208700
MD01G1209500_1	Chr01:30358655|30359365	0	0	0	0	171.312	474	MD01G1209500
n/a_98	Chr01:30389588|30394776	0	0	0	16.9236	0	5188	n/a
MD01G1209900_1	Chr01:30398849|30399046	0	0	628.817	0	0	197	MD01G1209900
MD01G1210100_1	Chr01:30405593|30405856	0	0	0	0	232.981	263	MD01G1210100
MD01G1210300_1	Chr01:30419791|30420038	0	0	0	0	248.073	247	MD01G1210300
n/a_99	Chr01:30461086|30461248	0	0	0	0	2237.8	162	n/a
MD01G1211300_1	Chr01:30486966|30487272	963.331	0	0	0	0	201	MD01G1211300
MD01G1212200_1	Chr01:30563611|30565736	0	0	0	63.323	50.7822	1173	MD01G1212200
n/a_100	Chr01:30564019|30584622	0	0	0	2.841	0	20603	n/a
MD01G1212800_1	Chr01:30626225|30626392	0	0	0	0	535.037	167	MD01G1212800
n/a_101	Chr01:30662216|30675059	0	7.38508	14.5554	4.55759	0	12843	n/a
MD01G1213600_1	Chr01:30682493|30683007	0	254.964	0	0	0	372	MD01G1213600
MD01G1216600_1	Chr01:30946840|30947493	187.552	0	0	0	0	492	MD01G1216600
n/a_102	Chr01:30955994|31005215	0	13.6401	0	10.7479	0	49221	n/a
n/a_103	Chr01:30957206|31007243	0	0	5.60391	0	0	50037	n/a
n/a_104	Chr01:30991652|31009966	0	0	0	0	23.0475	18314	n/a
MD01G1218300_1	Chr01:31063397|31064334	0	0	249.249	0	0	497	MD01G1218300
MD01G1218300_2	Chr01:31066541|31066758	0	0	570.862	0	0	217	MD01G1218300
MD01G1218500_1	Chr01:31069880|31070099	442.076	0	0	0	0	219	MD01G1218500
MD01G1218500_2	Chr01:31070168|31070375	467.704	0	0	0	0	207	MD01G1218500
MD01G1218700_1	Chr01:31085700|31085888	772.458	0	0	0	0	188	MD01G1218700
MD01G1219500_1	Chr01:31174380|31174943	0	310.472	0	0	0	249	MD01G1219500
MD01G1219900_1	Chr01:31228280|31228590	0	305.957	0	0	0	310	MD01G1219900
MD01G1220200_1	Chr01:31235058|31235277	0	0	416.635	0	0	219	MD01G1220200
MD01G1220700_1	Chr01:31275461|31276773	70.3318	0	0	0	0	1312	MD01G1220700
MD01G1220800_1	Chr01:31286763|31286940	962.906	0	0	0	0	177	MD01G1220800
n/a_105	Chr01:31423006|31443081	0	5.7764	0	0	0	20075	n/a
MD01G1222700_1	Chr01:31486658|31487330	0	115.041	0	87.103	0	672	MD01G1222700
MD01G1223200_1	Chr01:31505903|31506410	0	0	388.269	0	0	235	MD01G1223200
MD01G1224900_1	Chr01:31582611|31583058	0	0	0	162.592	0	360	MD01G1224900
MD01G1224900_2	Chr01:31583292|31583445	0	0	804.396	0	0	154	MD01G1224900
MD01G1225800_1	Chr01:31643075|31643462	331.926	0	0	0	0	278	MD01G1225800
MD01G1226000_1	Chr01:31654050|31654332	0	0	0	375.783	0	282	MD01G1226000
n/a_106	Chr01:31666147|31673347	0	32.2114	0	51.6101	0	7200	n/a
MD01G1229500_1	Chr01:31880451|31883118	0	0	0	0	24.635	2418	MD01G1229500
MD01G1229500_2	Chr01:31880684|31883118	0	24.7582	0	0	0	2301	MD01G1229500
MD01G1232300_1	Chr01:32088229|32088454	0	0	0	260.148	0	225	MD01G1232300
MD01G1232600_1	Chr01:32101561|32101894	0	0	411.005	0	0	333	MD01G1232600
n/a_107	Chr01:32123478|32123727	0	0	0	0	326.112	249	n/a
MD01G1233500_1	Chr01:32139095|32140449	0	0	0	66.2013	0	1122	MD01G1233500
n/a_108	Chr01:32251087|32267746	0	0	0	5.27041	0	16659	n/a
n/a_109	Chr01:32266675|32283069	0	0	7.55624	0	0	16394	n/a
n/a_110	Chr01:32368439|32369456	167.585	0	183.811	0	0	1017	n/a
MD01G1236300_1	Chr01:32378182|32378502	0	178.027	0	0	0	320	MD01G1236300
n/a_111	Chr01:32457910|32471620	0	491.671	0	283.5	0	13710	n/a
n/a_112	Chr01:32468532|32479579	0	0	0	0	210.773	11047	n/a
MD01G1238300_1	Chr01:32472062|32472292	0	0	538.595	0	0	230	MD01G1238300
MD01G1238900_1	Chr01:32527933|32528117	0	0	0	0	333.011	184	MD01G1238900
MD01G1240200_1	Chr01:32619818|32620562	265.923	0	0	0	0	347	MD01G1240200
MD01G1012300_1	Chr01:6362600|6364684	0	0	0	0	109.903	813	MD01G1012300
MD01G1015800_1	Chr01:7247374|7248854	0	0	0	178.183	0	657	MD01G1015800
MD01G1001600_1	Chr01:757267|757419	0	0	0	770.174	0	152	MD01G1001600
MD01G1001600_2	Chr01:757353|758169	0	0	0	83.4996	0	701	MD01G1001600
MD01G1001600_3	Chr01:758322|758502	0	474.738	0	0	0	180	MD01G1001600
MD01G1017700_1	Chr01:7758534|7759284	0	0	330.339	0	0	750	MD01G1017700
MD01G1017900_1	Chr01:7791570|7796422	0	0	77.5218	0	0	1177	MD01G1017900
n/a_29	Chr01:8338298|8339928	0	0	0	0	49.8171	1630	n/a
MD01G1021000_1	Chr01:8379149|8382045	0	0	0	0	369.525	403	MD01G1021000
MD01G1022500_1	Chr01:8963465|8963618	0	0	0	382.57	0	153	MD01G1022500
MD01G1022700_1	Chr01:9005791|9007553	0	0	0	0	90.6199	986	MD01G1022700
MD01G1022700_2	Chr01:9005814|9007553	0	98.4908	128.637	0	317.367	963	MD01G1022700
n/a_226	Chr02:10135353|10140742	94.176	68.7133	0	44.2446	0	5389	n/a
n/a_227	Chr02:10135453|10140966	0	0	0	15.926	0	5513	n/a
n/a_228	Chr02:10135576|10141002	62.4496	0	0	0	0	5426	n/a
MD02G1124600_1	Chr02:10143354|10143634	0	338.738	0	0	0	280	MD02G1124600
MD02G1127400_1	Chr02:10315701|10317283	0	0	0	92.7941	0	571	MD02G1127400
MD02G1127400_2	Chr02:10317211|10319022	0	0	0	223.979	0	392	MD02G1127400
MD02G1128300_1	Chr02:10373679|10374688	0	0	0	0	185.568	642	MD02G1128300
n/a_229	Chr02:10416127|10435182	0	0	0	0	212.574	19055	n/a
n/a_230	Chr02:10416567|10435570	76.9202	0	0	0	871.233	19003	n/a
n/a_231	Chr02:10417902|10436890	80.7519	0	0	0	647.651	18988	n/a
MD02G1130200_1	Chr02:10491199|10491866	138.344	0	0	0	0	667	MD02G1130200
n/a_232	Chr02:10511433|10522178	18.0204	5.30187	0	0	0	10745	n/a
n/a_233	Chr02:10516314|10522178	31.4718	0	0	0	0	5864	n/a
MD02G1132600_1	Chr02:10731262|10731756	0	0	0	107.258	0	494	MD02G1132600
MD02G1134200_1	Chr02:10877628|10878166	0	0	0	0	181.284	338	MD02G1134200
MD02G1136400_1	Chr02:11377984|11378409	0	0	331.793	319.272	0	275	MD02G1136400
MD02G1137500_1	Chr02:11486044|11486289	0	0	1126.15	0	0	110	MD02G1137500
n/a_234	Chr02:11600244|11612459	0	12.6578	14.9395	32.8087	0	12215	n/a
n/a_235	Chr02:11646669|11658779	248.116	82.7369	41.7148	12.2672	436.38	12110	n/a
MD02G1139900_1	Chr02:11658398|11658760	0	0	0	0	224.315	362	MD02G1139900
MD02G1139900_2	Chr02:11658467|11658663	0	0	0	0	303.916	196	MD02G1139900
MD02G1139900_3	Chr02:11658467|11658666	0	0	0	0	299.334	199	MD02G1139900
MD02G1139900_4	Chr02:11658573|11659721	0	0	0	0	156.311	392	MD02G1139900
MD02G1140000_1	Chr02:11665503|11665689	0	0	0	0	320.255	186	MD02G1140000
MD02G1140100_1	Chr02:11686002|11686166	0	0	0	0	363.216	164	MD02G1140100
MD02G1140100_2	Chr02:11686002|11686244	381.303	0	0	0	0	242	MD02G1140100
MD02G1140100_3	Chr02:11686112|11686331	0	866.179	0	0	551.787	219	MD02G1140100
MD02G1140100_4	Chr02:11686221|11686382	0	0	0	0	369.984	161	MD02G1140100
MD02G1140100_5	Chr02:11686258|11686540	0	0	0	0	860.057	282	MD02G1140100
MD02G1140100_6	Chr02:11686350|11686629	0	0	0	0	439.24	279	MD02G1140100
MD02G1140100_7	Chr02:11686399|11686678	0	0	0	0	433.123	279	MD02G1140100
MD02G1140100_8	Chr02:11686491|11686670	0	0	509.738	0	998.338	179	MD02G1140100
MD02G1140100_9	Chr02:11686641|11686811	1681.79	0	0	0	350.397	170	MD02G1140100
n/a_236	Chr02:11785965|11786287	0	360.128	0	658.204	739.969	322	n/a
n/a_237	Chr02:11882695|11883179	0	0	0	120.936	0	484	n/a
MD02G1146200_1	Chr02:12081539|12081719	806.789	0	0	0	0	180	MD02G1146200
MD02G1146200_2	Chr02:12081659|12081839	537.86	0	0	0	0	180	MD02G1146200
n/a_238	Chr02:12203360|12210314	0	272.366	0	0	0	6954	n/a
n/a_239	Chr02:12203528|12210501	0	0	0	0	8.78732	6973	n/a
n/a_240	Chr02:12203646|12210619	1559.62	1434.01	1743.43	936.335	1913.04	6973	n/a
n/a_241	Chr02:12203932|12210910	0	16.6181	0	0	114.879	6978	n/a
n/a_242	Chr02:12204594|12211630	295.082	0	225.832	174.188	0	7036	n/a
n/a_243	Chr02:12205065|12219229	0	0	0	0	53.4128	14164	n/a
n/a_244	Chr02:12205065|12219238	0	23.4222	0	0	0	14173	n/a
MD02G1016100_1	Chr02:1221531|1221694	849.16	0	0	0	0	163	MD02G1016100
MD02G1149400_1	Chr02:12306114|12309924	0	72.3852	0	0	0	1602	MD02G1149400
MD02G1149400_2	Chr02:12309825|12310215	0	0	0	169.825	0	312	MD02G1149400
MD02G1151300_1	Chr02:12483097|12483310	0	890.578	0	0	0	213	MD02G1151300
MD02G1151400_1	Chr02:12497409|12498398	0	0	0	53.5747	0	989	MD02G1151400
MD02G1016700_1	Chr02:1256998|1257166	0	0	737.363	0	0	168	MD02G1016700
MD02G1152800_1	Chr02:12650231|12650396	0	0	0	354.747	0	165	MD02G1152800
n/a_245	Chr02:12784862|12796838	0	0	0	19.9094	0	11976	n/a
MD02G1156700_1	Chr02:13028904|13029238	0	0	0	158.639	0	334	MD02G1156700
MD02G1157800_1	Chr02:13190127|13190367	0	322.114	0	0	0	240	MD02G1157800
MD02G1157800_2	Chr02:13190573|13190800	0	0	401.952	0	0	227	MD02G1157800
MD02G1157800_3	Chr02:13190632|13190830	0	0	938.462	0	0	198	MD02G1157800
MD02G1157800_4	Chr02:13190800|13191597	0	0	453.762	0	0	273	MD02G1157800
MD02G1159300_1	Chr02:13362688|13367489	0	0	0	0	50.6246	1604	MD02G1159300
MD02G1159300_2	Chr02:13364245|13366209	173.503	0	0	0	0	837	MD02G1159300
MD02G1159300_3	Chr02:13365031|13366209	701.352	0	301.63	338.622	969.108	605	MD02G1159300
MD02G1018000_1	Chr02:1336554|1336738	0	0	1683.11	0	0	184	MD02G1018000
MD02G1161000_1	Chr02:13499041|13500012	0	89.5733	0	0	0	636	MD02G1161000
n/a_246	Chr02:13568868|13577665	0	0	0	1843.47	0	8797	n/a
MD02G1161700_1	Chr02:13581506|13583167	0	34.2978	0	0	0	1661	MD02G1161700
n/a_125	Chr02:1397322|1408565	0	0	0	0	7.22244	11243	n/a
n/a_126	Chr02:1397875|1409357	0	0	0	546.913	0	11482	n/a
n/a_127	Chr02:1397875|1409378	0	0	0	5.08851	0	11503	n/a
n/a_247	Chr02:14028023|14070675	32.2313	38.4839	49.7845	50.2788	5.7064	42652	n/a
n/a_248	Chr02:14042808|14070197	29.3829	34.9866	25.1069	62.174	13.639	27389	n/a
n/a_249	Chr02:14043850|14083404	0	0	0	0	4.51794	39554	n/a
n/a_250	Chr02:14085323|14115564	0	46.2858	0	0	0	30241	n/a
n/a_251	Chr02:14085829|14116224	0	0	0	0	95.8379	30395	n/a
MD02G1165300_1	Chr02:14114389|14115564	0	0	0	0	56.2488	1059	MD02G1165300
n/a_128	Chr02:1414349|1435794	0	0	0	77.7895	0	21445	n/a
n/a_129	Chr02:1414474|1439751	0	0	0	2.09619	0	25277	n/a
MD02G1166800_1	Chr02:14311393|14312436	0	0	0	86.4362	0	613	MD02G1166800
MD02G1166800_2	Chr02:14311993|14312236	0	0	769.281	0	0	243	MD02G1166800
MD02G1020100_1	Chr02:1438683|1438847	0	867.499	0	1292.33	0	164	MD02G1020100
MD02G1020100_2	Chr02:1439769|1439922	0	558.516	0	0	0	153	MD02G1020100
MD02G1020200_1	Chr02:1442198|1442567	250.069	0	0	0	0	369	MD02G1020200
MD02G1168400_1	Chr02:14452711|14453406	0	0	366.5	0	181.284	338	MD02G1168400
MD02G1168400_2	Chr02:14452711|14453425	0	397.402	1274.35	0	0	358	MD02G1168400
MD02G1168400_3	Chr02:14452714|14453406	678.346	0	0	0	0	335	MD02G1168400
MD02G1168400_4	Chr02:14452997|14453425	0	322.114	0	0	0	240	MD02G1168400
MD02G1168400_5	Chr02:14453826|14455344	201.697	0	0	0	72.5136	845	MD02G1168400
n/a_252	Chr02:14482522|14485134	0	0	0	0	23.4586	2612	n/a
MD02G1021200_1	Chr02:1498422|1499285	157.198	0	0	0	0	587	MD02G1021200
MD02G1172600_1	Chr02:15077407|15077570	0	581.881	0	0	0	163	MD02G1172600
n/a_130	Chr02:1527681|1540224	9.05867	49.5599	0	0	0	12543	n/a
n/a_131	Chr02:1527774|1540317	0	111.512	0	102.636	0	12543	n/a
n/a_132	Chr02:1528155|1540698	11.0351	154.984	0	125.474	4.74906	12543	n/a
MD02G1174500_1	Chr02:15332314|15332827	0	0	0	188.817	0	310	MD02G1174500
n/a_133	Chr02:1534272|1548544	0	0	0	10.2532	0	14272	n/a
n/a_134	Chr02:1539768|1550117	0	11.0095	0	0	0	10349	n/a
MD02G1176000_1	Chr02:15502754|15503028	0	0	333.004	0	0	274	MD02G1176000
MD02G1022200_1	Chr02:1551852|1552012	1758.53	3344.25	1548.46	4275.64	930.742	160	MD02G1022200
n/a_253	Chr02:15537004|15537359	259.931	0	0	0	0	355	n/a
MD02G1176300_1	Chr02:15560847|15561090	0	0	0	240.877	0	243	MD02G1176300
MD02G1178100_1	Chr02:15733697|15733928	0	0	0	458.748	0	231	MD02G1178100
n/a_254	Chr02:15871012|15871180	0	0	0	0	709.137	168	n/a
n/a_255	Chr02:15871204|15871419	0	0	0	0	277.058	215	n/a
MD02G1023000_1	Chr02:1607603|1607845	381.303	0	0	0	0	242	MD02G1023000
MD02G1023100_1	Chr02:1608882|1609097	0	539.354	0	0	0	215	MD02G1023100
MD02G1181200_1	Chr02:16291583|16293294	182.669	0	0	0	0	530	MD02G1181200
MD02G1182600_1	Chr02:16471876|16472117	0	0	1163.5	0	0	241	MD02G1182600
MD02G1182600_2	Chr02:16472261|16472441	0	0	0	412.655	0	180	MD02G1182600
MD02G1184400_1	Chr02:16704613|16705265	174.268	0	0	0	0	652	MD02G1184400
MD02G1184400_2	Chr02:16705804|16705995	1189.77	0	0	0	0	191	MD02G1184400
MD02G1184400_3	Chr02:16706356|16707098	449.028	0	0	0	0	411	MD02G1184400
MD02G1186000_1	Chr02:16899978|16900653	0	0	0	275.103	0	270	MD02G1186000
MD02G1186000_2	Chr02:16901249|16901470	0	0	0	264.856	0	221	MD02G1186000
MD02G1187200_1	Chr02:17064276|17064462	0	0	0	798.687	0	186	MD02G1187200
MD02G1188800_1	Chr02:17253782|17253960	0	532.846	0	0	0	178	MD02G1188800
MD02G1189200_1	Chr02:17279385|17279683	0	0	0	623.358	0	170	MD02G1189200
n/a_256	Chr02:17425818|17426047	0	0	0	255.603	0	229	n/a
MD02G1190200_1	Chr02:17532087|17532776	0	0	660.677	0	0	375	MD02G1190200
MD02G1190300_1	Chr02:17547337|17547491	628.667	0	0	0	0	154	MD02G1190300
n/a_257	Chr02:17754975|17810547	93.0296	0	0	0	0	55572	n/a
n/a_135	Chr02:1811331|1830793	0	33.9346	0	38.0492	0	19462	n/a
n/a_136	Chr02:1817865|1842811	16.5346	0	0	0	4.88266	24946	n/a
MD02G1194100_1	Chr02:18481077|18481291	0	0	1310.29	0	0	214	MD02G1194100
MD02G1195100_1	Chr02:18673275|18673669	0	214.168	0	0	0	266	MD02G1195100
MD02G1195400_1	Chr02:18715703|18715957	0	223.406	0	0	0	255	MD02G1195400
MD02G1195800_1	Chr02:18766064|18766333	539.859	0	0	0	0	269	MD02G1195800
n/a_258	Chr02:18770856|18856902	0	20.3921	0	0	51.4805	86046	n/a
n/a_115	Chr02:196130|205898	0	217.933	82.4325	486.66	414.346	9768	n/a
MD02G1199700_1	Chr02:19651157|19651962	0	0	236.381	0	0	386	MD02G1199700
MD02G1199700_2	Chr02:19651469|19651962	0	0	0	166.621	0	318	MD02G1199700
n/a_116	Chr02:198350|208572	0	0	21.0448	0	0	10222	n/a
MD02G1201700_1	Chr02:19952035|19954947	0	0	0	0	115.017	1059	MD02G1201700
MD02G1202100_1	Chr02:20023323|20025113	0	0	0	0	45.8637	1336	MD02G1202100
MD02G1203100_1	Chr02:20212691|20212843	0	1017.2	0	0	0	152	MD02G1203100
MD02G1205100_1	Chr02:20519086|20519258	0	0	0	0	534.366	172	MD02G1205100
MD02G1206000_1	Chr02:20753550|20754001	0	0	422.422	0	0	216	MD02G1206000
MD02G1206000_2	Chr02:20755842|20757774	0	0	229.254	0	0	597	MD02G1206000
MD02G1207800_1	Chr02:21016661|21016964	0	382.71	0	0	0	303	MD02G1207800
MD02G1210400_1	Chr02:21932225|21932399	0	0	711.937	0	0	174	MD02G1210400
n/a_137	Chr02:2240672|2253520	0	0	0	9.11164	0	12848	n/a
MD02G1029300_1	Chr02:2264286|2265329	0	0	87.4814	0	0	1043	MD02G1029300
MD02G1211700_1	Chr02:22644053|22648645	0	0	0	88.4565	0	599	MD02G1211700
MD02G1212400_1	Chr02:22761231|22761455	0	423.422	0	0	0	224	MD02G1212400
MD02G1002900_1	Chr02:230065|231663	0	0	0	0	136.017	597	MD02G1002900
MD02G1213500_1	Chr02:23302591|23302828	408.501	0	0	0	0	237	MD02G1213500
MD02G1213500_2	Chr02:23303159|23304130	0	0	358.026	0	0	346	MD02G1213500
MD02G1214300_1	Chr02:23821559|23824089	0	0	0	0	84.3218	963	MD02G1214300
MD02G1214300_2	Chr02:23827802|23828102	307.584	0	0	0	0	300	MD02G1214300
MD02G1216600_1	Chr02:24765414|24765576	0	7025.26	0	0	0	162	MD02G1216600
MD02G1218200_1	Chr02:25355769|25361086	52.6987	0	0	0	0	1751	MD02G1218200
MD02G1032700_1	Chr02:2567735|2568228	0	0	0	219.499	0	400	MD02G1032700
MD02G1032900_1	Chr02:2582700|2583180	0	0	0	234.315	0	317	MD02G1032900
MD02G1032900_2	Chr02:2584217|2584391	649.274	0	0	0	0	175	MD02G1032900
MD02G1032900_3	Chr02:2585703|2586000	0	0	0	386.864	0	192	MD02G1032900
MD02G1221900_1	Chr02:25875389|25876782	0	0	0	0	84.2539	707	MD02G1221900
MD02G1223800_1	Chr02:26216060|26216706	0	0	0	0	610.64	647	MD02G1223800
MD02G1003700_1	Chr02:263445|264194	0	0	0	90.329	0	648	MD02G1003700
MD02G1226500_1	Chr02:26647538|26648432	0	0	180.054	0	0	688	MD02G1226500
MD02G1226500_2	Chr02:26649011|26649576	0	0	320.925	0	0	386	MD02G1226500
n/a_138	Chr02:2692557|2705027	0	0	0	7.04088	0	12470	n/a
n/a_139	Chr02:2693335|2705457	39.0321	124.741	43.5701	433.824	1627.15	12122	n/a
n/a_140	Chr02:2694908|2707386	0	0	0	0	66.2926	12478	n/a
n/a_259	Chr02:27659397|27659554	0	0	581.167	0	0	157	n/a
n/a_260	Chr02:27753246|27764850	0	64.1986	0	50.0695	0	11604	n/a
MD02G1036700_1	Chr02:2783954|2785378	394.339	0	0	0	0	234	MD02G1036700
MD02G1232400_1	Chr02:27856886|27857079	0	400.557	0	0	0	193	MD02G1232400
MD02G1233200_1	Chr02:27959561|27959723	854.401	0	0	0	0	162	MD02G1233200
n/a_261	Chr02:28091288|28190928	0	0	0	5.85439	0	99640	n/a
n/a_262	Chr02:28223786|28235408	0	225.121	113.838	105.454	249.47	11622	n/a
n/a_263	Chr02:28225750|28248402	0	63.4992	0	76.7316	0	22652	n/a
MD02G1239100_1	Chr02:28676648|28677691	0	278.575	557.721	0	696.703	409	MD02G1239100
n/a_264	Chr02:28854293|28883342	0	4.89758	0	3.02247	0	29049	n/a
MD02G1241400_1	Chr02:29013944|29014721	0	235.408	0	0	0	363	MD02G1241400
MD02G1241600_1	Chr02:29028663|29029810	0	102.648	0	0	0	924	MD02G1241600
MD02G1241600_2	Chr02:29032105|29032441	0	0	0	498.155	0	235	MD02G1241600
n/a_265	Chr02:29236875|29252120	9.07924	0	0	0	0	15245	n/a
MD02G1242600_1	Chr02:29295595|29295821	0	0	1249.91	0	0	73	MD02G1242600
MD02G1242600_2	Chr02:29295835|29295987	0	0	0	385.087	0	152	MD02G1242600
MD02G1244400_1	Chr02:29432315|29432578	0	216.611	0	0	0	263	MD02G1244400
MD02G1244400_2	Chr02:29432462|29434615	0	141.072	0	0	0	548	MD02G1244400
MD02G1244400_3	Chr02:29432462|29438842	0	69.7401	91.086	0	0	1360	MD02G1244400
MD02G1244500_1	Chr02:29446812|29447010	0	0	0	375.141	0	198	MD02G1244500
MD02G1245100_1	Chr02:29510241|29510432	0	298.265	0	0	0	191	MD02G1245100
n/a_266	Chr02:29632400|29660564	0	0	0	8.39212	0	28164	n/a
n/a_267	Chr02:29634543|29662708	87.1047	121.896	114.081	79.897	6.50015	28165	n/a
MD02G1248400_1	Chr02:29926560|29930075	0	215.56	0	0	0	660	MD02G1248400
n/a_268	Chr02:30310246|30403956	0	0	0	6.40355	0	93710	n/a
n/a_269	Chr02:30311907|30404274	8.15594	3.8545	5.48125	2.18196	10.0659	92367	n/a
n/a_270	Chr02:30540588|30586354	0	0	1.99369	0	0	45766	n/a
MD02G1254000_1	Chr02:30562192|30562362	569.498	0	0	0	0	170	MD02G1254000
n/a_271	Chr02:30704466|30704628	1753.44	0	0	0	0	162	n/a
MD02G1255200_1	Chr02:30715965|30716755	1745.12	0	444.003	0	145.523	558	MD02G1255200
MD02G1255700_1	Chr02:30767317|30767687	261.661	0	0	0	0	370	MD02G1255700
n/a_272	Chr02:31015335|31015787	0	171.034	0	0	0	452	n/a
MD02G1258800_1	Chr02:31207324|31209464	174.441	0	0	95.4692	0	555	MD02G1258800
n/a_273	Chr02:31360308|31404547	0	2.62124	0	11.3893	0	44239	n/a
n/a_274	Chr02:31360483|31404191	0	0	0	4.49676	0	43708	n/a
n/a_275	Chr02:31360537|31404777	0	1.74746	0	15.3081	0	44240	n/a
n/a_276	Chr02:31360797|31405037	2.56833	6.94407	2.06246	8.51243	0	44240	n/a
n/a_277	Chr02:31364293|31392613	6.01816	5.45957	0	0	0	28320	n/a
n/a_278	Chr02:31366499|31401832	38.7913	11.2863	24.4477	21.7836	23.9919	35333	n/a
n/a_279	Chr02:31367895|31403292	0	0	3.86656	12.8844	0	35397	n/a
MD02G1260600_1	Chr02:31413929|31414220	0	0	0	0	279.044	291	MD02G1260600
n/a_280	Chr02:31414323|31430998	262.916	93.7025	168.158	148.831	199.379	16675	n/a
MD02G1260800_1	Chr02:31438556|31440895	148.115	0	750.142	0	0	623	MD02G1260800
MD02G1261200_1	Chr02:31511225|31512762	0	0	0	203.009	0	261	MD02G1261200
n/a_281	Chr02:31595258|31603644	52.6027	122.893	27.201	22.1141	0	8386	n/a
MD02G1000900_1	Chr02:31705|33513	0	67.18	0	0	0	848	MD02G1000900
MD02G1263300_1	Chr02:31763737|31764280	0	1104.04	0	0	0	258	MD02G1263300
MD02G1263600_1	Chr02:31773854|31777597	0	0	0	92.9636	0	799	MD02G1263600
n/a_282	Chr02:31783074|31800852	0	0	0	129.52	0	17778	n/a
n/a_283	Chr02:31783351|31801020	67.9113	196.78	68.769	0	0	17669	n/a
MD02G1265200_1	Chr02:31952517|31952714	0	289.181	0	0	0	197	MD02G1265200
n/a_284	Chr02:31965493|31967044	0	55.0954	0	0	57.6088	1551	n/a
n/a_285	Chr02:31966046|31967044	503.484	0	748.118	0	980.796	998	n/a
MD02G1266200_1	Chr02:32031928|32032095	0	0	0	317.278	0	167	MD02G1266200
n/a_286	Chr02:32078198|32078445	460.012	0	0	0	0	247	n/a
n/a_287	Chr02:32078238|32078523	0	0	320.151	0	0	285	n/a
MD02G1266700_1	Chr02:32083357|32083507	1613.58	0	0	0	0	150	MD02G1266700
n/a_288	Chr02:32119229|32131999	18.9535	0	0	0	0	12770	n/a
n/a_289	Chr02:32122050|32134466	7.43197	0	0	0	0	12416	n/a
MD02G1267400_1	Chr02:32171796|32171957	0	0	769.422	0	0	161	MD02G1267400
MD02G1270900_1	Chr02:32562237|32562878	0	141.713	308.152	0	0	402	MD02G1270900
n/a_290	Chr02:32602779|32609509	0	0	18.4067	0	0	6730	n/a
n/a_291	Chr02:32602860|32608594	683.815	0	0	0	801.114	5734	n/a
n/a_292	Chr02:32605466|32611742	1893.45	520.879	1202.59	489.868	885.715	6276	n/a
MD02G1004700_1	Chr02:326418|326598	0	0	506.906	0	0	180	MD02G1004700
MD02G1040300_1	Chr02:3283343|3283498	0	0	1177.33	0	0	155	MD02G1040300
n/a_141	Chr02:3284077|3352367	118.544	6.46481	371.546	0	1.78361	68290	n/a
n/a_142	Chr02:3284077|3352374	1.35109	0	5.44139	0	0	68297	n/a
n/a_143	Chr02:3289985|3364703	1.29574	0	0	0	0	74718	n/a
MD02G1275200_1	Chr02:32942166|32942337	0	0	1811.07	0	0	171	MD02G1275200
MD02G1277900_1	Chr02:33371587|33371818	0	246.617	0	0	0	231	MD02G1277900
n/a_144	Chr02:3348217|3384556	2.53929	0	7.71631	4.83226	0	36339	n/a
MD02G1279400_1	Chr02:33576670|33576822	747.519	0	0	0	0	152	MD02G1279400
n/a_293	Chr02:33719924|33725970	366.921	0	244.407	96.8131	667.111	6046	n/a
n/a_294	Chr02:33748011|33757537	29.8191	8.11542	61.5947	71.2896	28.587	9526	n/a
MD02G1282000_1	Chr02:33793694|33793887	0	0	0	384.86	0	193	MD02G1282000
MD02G1282000_2	Chr02:33794057|33794238	0	0	0	0	338.53	181	MD02G1282000
MD02G1283400_1	Chr02:33988661|33988820	0	0	0	0	385.371	159	MD02G1283400
MD02G1284000_1	Chr02:34077504|34078420	195.914	0	0	0	0	471	MD02G1284000
n/a_295	Chr02:34096026|34129488	159.597	1.70249	47.6061	9.21674	3.64003	33462	n/a
n/a_296	Chr02:34262730|34269394	0	14.2327	0	0	0	6664	n/a
n/a_297	Chr02:34293411|34326406	0	4.31186	0	0	0	32995	n/a
n/a_298	Chr02:34296659|34311349	0	0	0	0	6.08245	14690	n/a
n/a_299	Chr02:34301373|34371448	12.6382	43.6964	46.7519	32.1171	0	70075	n/a
n/a_300	Chr02:34301579|34371654	5.52635	9.10124	4.37193	11.2147	0	70075	n/a
n/a_301	Chr02:34303345|34373405	0	0	0	6.80658	0	70060	n/a
MD02G1286900_1	Chr02:34371378|34371604	0	419.675	0	0	0	226	MD02G1286900
n/a_302	Chr02:34454111|34454271	0	0	1168.35	0	0	160	n/a
MD02G1289200_1	Chr02:34543378|34543556	0	960.145	0	0	0	178	MD02G1289200
MD02G1289800_1	Chr02:34590001|34590158	3375.53	0	0	0	1734.52	157	MD02G1289800
MD02G1290300_1	Chr02:34615516|34616287	0	0	897.659	0	0	138	MD02G1290300
MD02G1292200_1	Chr02:34813897|34814235	0	0	366.5	0	0	338	MD02G1292200
n/a_303	Chr02:34814026|34832176	0	0	25.5035	0	0	18150	n/a
n/a_304	Chr02:34814083|34832233	0	0	67.2927	0	0	18150	n/a
MD02G1042500_1	Chr02:3487272|3488111	138.969	0	0	0	0	664	MD02G1042500
MD02G1042800_1	Chr02:3519491|3521799	0	0	0	0	56.6827	1081	MD02G1042800
MD02G1042800_2	Chr02:3521269|3522223	0	0	0	0	129.777	459	MD02G1042800
MD02G1297300_1	Chr02:35251301|35252025	227.246	0	0	0	0	500	MD02G1297300
MD02G1297300_2	Chr02:35252314|35252777	0	0	532.579	0	0	351	MD02G1297300
MD02G1298200_1	Chr02:35314575|35315227	0	0	999.654	0	0	187	MD02G1298200
MD02G1043000_1	Chr02:3533225|3534110	164.671	0	0	0	0	690	MD02G1043000
n/a_145	Chr02:3536978|3548107	61.937	38.7421	264.786	51.7796	0	11129	n/a
n/a_146	Chr02:3539234|3549287	0	109.493	0	10.5412	0	10053	n/a
n/a_147	Chr02:3543276|3551083	0	0	0	122.755	0	7807	n/a
n/a_305	Chr02:35452745|35460296	0	29.0993	0	7.01701	0	7551	n/a
n/a_306	Chr02:35452921|35460472	0	70.3686	0	7.01701	0	7551	n/a
n/a_307	Chr02:35453387|35460938	0	0	24.1672	0	0	7551	n/a
MD02G1300000_1	Chr02:35474167|35474360	0	0	968.577	0	0	193	MD02G1300000
MD02G1300000_2	Chr02:35475824|35476213	0	0	0	185.914	0	285	MD02G1300000
MD02G1300300_1	Chr02:35505916|35506084	0	0	0	884.261	0	168	MD02G1300300
MD02G1300300_2	Chr02:35506570|35507485	0	0	0	0	177.49	915	MD02G1300300
n/a_308	Chr02:35515573|35524017	13.456	9.15531	0	8.79653	0	8444	n/a
n/a_309	Chr02:35612916|35623283	0	0	0	28.1103	71.8234	10367	n/a
MD02G1301900_1	Chr02:35623854|35624015	0	0	0	0	756.469	162	MD02G1301900
n/a_310	Chr02:35643532|35660206	0	0	0	0	394.759	16674	n/a
MD02G1302000_1	Chr02:35644610|35644795	0	0	0	0	662.421	185	MD02G1302000
n/a_311	Chr02:35690968|35783690	0	0.614402	0	0	0	92722	n/a
n/a_312	Chr02:35719121|35742554	5.90676	0	0	0	0	23433	n/a
n/a_313	Chr02:35784787|35803237	0	0	0	5.74368	0	18450	n/a
n/a_314	Chr02:35806294|35811216	177.301	384.97	182.133	494.058	353.862	4922	n/a
n/a_315	Chr02:35974291|35976165	0	91.1984	0	0	0	1874	n/a
MD02G1306700_1	Chr02:35994341|35994685	0	0	684.403	0	0	181	MD02G1306700
n/a_316	Chr02:36354313|36376576	12.7592	0	0	0	0	22263	n/a
MD02G1308300_1	Chr02:36354777|36354985	0	455.993	0	0	0	208	MD02G1308300
MD02G1308700_1	Chr02:36393667|36394273	159.76	0	0	0	0	606	MD02G1308700
MD02G1308700_2	Chr02:36394397|36395855	0	0	0	0	223.518	533	MD02G1308700
MD02G1309200_1	Chr02:36450443|36450701	0	299.641	0	0	0	258	MD02G1309200
n/a_317	Chr02:36543404|36590142	0	3.4824	0	0	0	46738	n/a
n/a_318	Chr02:36743208|36772318	0	1.95701	0	0	0	29110	n/a
MD02G1046000_1	Chr02:3683687|3683909	415.655	0	0	0	0	222	MD02G1046000
MD02G1046100_1	Chr02:3685726|3685888	569.601	878.209	0	687.758	0	162	MD02G1046100
MD02G1313900_1	Chr02:36937012|36939380	0	0	0	98.8736	0	2368	MD02G1313900
MD02G1313900_2	Chr02:36939411|36940831	0	0	0	113.401	0	655	MD02G1313900
MD02G1314300_1	Chr02:36963272|36963490	634.922	0	0	0	0	218	MD02G1314300
MD02G1315300_1	Chr02:37015937|37016162	0	0	825.846	0	0	225	MD02G1315300
MD02G1315400_1	Chr02:37019699|37021133	0	0	0	0	256.019	359	MD02G1315400
MD02G1316000_1	Chr02:37065783|37066322	0	0	0	0	153.185	400	MD02G1316000
MD02G1316000_2	Chr02:37066982|37067243	0	218.271	0	448.53	0	261	MD02G1316000
n/a_319	Chr02:37176460|37224849	660.758	416.177	0	310.877	0	48389	n/a
MD02G1317800_1	Chr02:37223361|37223524	692.822	0	0	0	0	164	MD02G1317800
MD02G1317800_2	Chr02:37225466|37225768	0	0	0	290.728	0	302	MD02G1317800
MD02G1319100_1	Chr02:37350630|37351778	0	0	0	181.217	0	323	MD02G1319100
MD02G1319100_2	Chr02:37352652|37354671	0	0	0	112.564	0	780	MD02G1319100
MD02G1319100_3	Chr02:37355898|37356430	0	0	0	180.658	0	324	MD02G1319100
MD02G1319100_4	Chr02:37355898|37357325	0	0	0	284.833	0	411	MD02G1319100
MD02G1319100_5	Chr02:37355898|37358850	0	0	0	0	178.703	1766	MD02G1319100
MD02G1319100_6	Chr02:37362821|37364614	0	0	0	68.2802	0	776	MD02G1319100
n/a_320	Chr02:37411521|37411696	0	0	521.389	0	0	175	n/a
n/a_321	Chr02:37411521|37411702	0	0	0	292.737	0	181	n/a
MD02G1048800_1	Chr02:3842279|3842986	0	143.498	0	0	0	397	MD02G1048800
MD02G1048800_2	Chr02:3843189|3843625	1655.62	1463.09	1953.87	2234.08	343.328	347	MD02G1048800
MD02G1048800_3	Chr02:3843436|3843856	0	0	424.236	0	0	292	MD02G1048800
MD02G1048800_4	Chr02:3843470|3843625	0	748.137	0	0	0	155	MD02G1048800
n/a_148	Chr02:3896514|3905509	0	9.50005	0	0	0	8995	n/a
n/a_149	Chr02:3902524|3906295	0	58.2279	0	132.434	0	3771	n/a
n/a_150	Chr02:3902819|3906316	622.242	0	0	83.6906	105.131	3497	n/a
n/a_151	Chr02:3908856|3918611	72.7801	35.4546	0	10.8632	8.32413	9755	n/a
n/a_152	Chr02:3910728|3919361	10.6887	0	0	0	0	8633	n/a
n/a_153	Chr02:3910905|3919538	0	44.5399	0	0	0	8633	n/a
n/a_117	Chr02:406681|414371	0	14.8163	56.3809	0	19.6981	7690	n/a
Apple_newGene_21821_1	Chr02:4191325|4220194	0	0	0	7.92467	0	9373	Apple_newGene_21821
Apple_newGene_21821_2	Chr02:4224897|4292970	0	0	0	0	20.3636	7313	Apple_newGene_21821
Apple_newGene_21821_3	Chr02:4261528|4343053	5.41681	0	0	0	0	17035	Apple_newGene_21821
Apple_newGene_21821_4	Chr02:4369355|4391452	0	0	0	16.2344	0	6863	Apple_newGene_21821
Apple_newGene_21821_5	Chr02:4369355|4392158	24.3824	0	32.7327	0	15.7399	7569	Apple_newGene_21821
Apple_newGene_21821_6	Chr02:4369355|4467533	0	10.169	0	0	0	9327	Apple_newGene_21821
Apple_newGene_21821_7	Chr02:4464872|4465315	384.728	0	0	0	0	443	Apple_newGene_21821
MD02G1056800_1	Chr02:4602336|4602664	0	0	0	501.537	0	328	MD02G1056800
MD02G1007200_1	Chr02:469227|470164	0	0	0	114.098	0	651	MD02G1007200
MD02G1007600_1	Chr02:481833|483498	292.842	0	0	0	0	776	MD02G1007600
n/a_154	Chr02:4890119|4914867	37.4663	94.6641	31.1281	86.4487	21.2109	24748	n/a
n/a_155	Chr02:4890589|4915471	0	3.81186	0	0	0	24882	n/a
MD02G1061700_1	Chr02:4951412|4951581	0	0	733	0	0	169	MD02G1061700
MD02G1062600_1	Chr02:5019949|5021830	0	0	0	255.251	0	291	MD02G1062600
MD02G1008300_1	Chr02:516288|516456	0	0	0	315.389	0	168	MD02G1008300
MD02G1064300_1	Chr02:5193241|5194107	290.174	812.047	1954.79	333.242	187.319	318	MD02G1064300
MD02G1064300_2	Chr02:5193241|5194484	0	0	0	0	648.283	508	MD02G1064300
n/a_156	Chr02:5205455|5233799	0	16.1179	0	0	0	28344	n/a
n/a_157	Chr02:5209514|5241259	0	4.48165	0	0	0	31745	n/a
MD02G1064800_1	Chr02:5253565|5254509	0	0	0	0	134.965	454	MD02G1064800
MD02G1064900_1	Chr02:5260663|5261192	0	0	0	0	569.838	285	MD02G1064900
n/a_158	Chr02:5335517|5339214	46.1007	186.893	50.5641	85.4297	64.4495	3697	n/a
n/a_159	Chr02:5383557|5401747	7.98362	0	0	0	0	18190	n/a
MD02G1008400_1	Chr02:541396|541753	0	159.13	0	0	0	358	MD02G1008400
n/a_118	Chr02:545875|548210	0	0	0	136.405	0	2335	n/a
n/a_119	Chr02:545895|548210	0	0	0	64.171	0	2315	n/a
MD02G1067100_1	Chr02:5488364|5488558	0	0	0	0	460.573	194	MD02G1067100
n/a_160	Chr02:5494413|5499654	129.308	985.639	0	161.757	617.366	5241	n/a
n/a_161	Chr02:5495288|5500728	0	198.953	0	156.017	0	5440	n/a
n/a_162	Chr02:5496174|5501564	0	31.708	0	0	0	5390	n/a
MD02G1067200_1	Chr02:5503018|5503214	0	0	0	0	303.916	196	MD02G1067200
MD02G1067300_1	Chr02:5510298|5510733	0	0	763.001	0	0	245	MD02G1067300
MD02G1068700_1	Chr02:5573989|5578517	50.9527	0	0	0	0	1811	MD02G1068700
n/a_120	Chr02:558666|561878	57.4566	107.436	391.112	233.829	56.1672	3212	n/a
n/a_121	Chr02:558666|562968	0	26.9552	0	0	0	4302	n/a
n/a_163	Chr02:5662687|5737788	0	11.1781	0	6.96293	0	75101	n/a
n/a_164	Chr02:5664636|5739420	5.31772	0	0	0	0	74784	n/a
MD02G1008700_1	Chr02:566515|566855	895.877	0	0	0	0	206	MD02G1008700
n/a_165	Chr02:5667015|5759649	0	64.4454	17.2372	37.8906	0	92634	n/a
n/a_166	Chr02:5667447|5760178	0	1.84303	0	0	0	92731	n/a
n/a_167	Chr02:5667451|5760103	0	51.987	0	26.3561	0	92652	n/a
MD02G1069600_1	Chr02:5668044|5668573	0	0	0	159.927	0	366	MD02G1069600
n/a_168	Chr02:5668987|5710211	12.6965	24.0921	72.5351	13.7229	6.60586	41224	n/a
n/a_169	Chr02:5668987|5760828	0	1.46205	0	0	0	91841	n/a
n/a_170	Chr02:5669870|5697233	0	0	6.83168	0	0	27363	n/a
n/a_171	Chr02:5669954|5697317	0	0	0	3.2087	0	27363	n/a
n/a_172	Chr02:5677202|5748000	0	63.3972	0	0	0	70798	n/a
n/a_173	Chr02:5694231|5771250	0	41.626	0	26.7808	0	77019	n/a
n/a_174	Chr02:5694746|5727698	0	13.3271	0	8.53869	0	32952	n/a
n/a_175	Chr02:5695092|5709370	0	24.365	0	0	10.7287	14278	n/a
n/a_176	Chr02:5696206|5774819	1.8473	1.70806	3.56688	5.73345	2.72803	78613	n/a
n/a_177	Chr02:5733448|5772576	0	1.45596	0	0	0	39128	n/a
n/a_178	Chr02:5734164|5772834	0	0	0	0	2.09987	38670	n/a
n/a_179	Chr02:5734164|5772872	0	2.45031	0	0	3.91336	38708	n/a
n/a_180	Chr02:5734507|5773242	0	2.20609	8.7517	0	0	38735	n/a
n/a_181	Chr02:5747856|5781815	0	0	0	4.37456	0	33959	n/a
n/a_182	Chr02:5772361|5824787	23.183	28.2136	16.7245	8.56156	6.91497	52426	n/a
Apple_newGene_21981_1	Chr02:5804250|5822696	549.978	2182.5	1184.1	2310	294.988	2431	Apple_newGene_21981
Apple_newGene_21981_2	Chr02:5804250|5824412	0	0	0	0	28.606	3213	Apple_newGene_21981
Apple_newGene_21981_3	Chr02:5804407|5824569	45.1983	17.7307	0	24.7364	169.313	3213	Apple_newGene_21981
Apple_newGene_21981_4	Chr02:5804562|5824815	27.9199	0	0	0	0	3305	Apple_newGene_21981
Apple_newGene_21981_5	Chr02:5805211|5825377	0	602.607	0	0	0	3213	Apple_newGene_21981
Apple_newGene_21981_6	Chr02:5806095|5807135	0	0	137.277	0	0	997	Apple_newGene_21981
Apple_newGene_21981_7	Chr02:5806749|5827003	474.266	24.0608	217.14	879.928	722.246	3213	Apple_newGene_21981
Apple_newGene_21981_8	Chr02:5867589|5867821	0	0	0	252.298	0	232	Apple_newGene_21981
Apple_newGene_21981_9	Chr02:5899714|5904809	0	195.715	0	0	0	1975	Apple_newGene_21981
Apple_newGene_21981_10	Chr02:5899979|5905006	5869.38	98822.2	5015.7	25533	604.373	1881	Apple_newGene_21981
Apple_newGene_21981_11	Chr02:5900303|5905219	0	0	0	98.5906	0	1881	Apple_newGene_21981
Apple_newGene_21981_12	Chr02:5901302|5905667	0	6950.72	0	0	0	1881	Apple_newGene_21981
MD02G1073500_1	Chr02:5909554|5910013	0	206.637	0	0	0	459	MD02G1073500
Apple_newGene_21981_13	Chr02:5909750|5909927	0	0	0	330.696	0	177	Apple_newGene_21981
n/a_183	Chr02:5997995|6018120	0	0	6.80073	0	0	20125	n/a
n/a_184	Chr02:5999413|6019712	134.339	196.86	176.688	179.329	103.366	20299	n/a
n/a_185	Chr02:6108614|6163401	0	1.03982	0	1.06838	0	54787	n/a
n/a_186	Chr02:6138593|6166287	0	0	6.70959	0	0	27694	n/a
MD02G1009500_1	Chr02:637071|637239	0	0	0	0	354.568	168	MD02G1009500
n/a_187	Chr02:6371132|6382630	16.0507	0	16.1607	42.982	0	11498	n/a
MD02G1009600_1	Chr02:640450|640611	0	589.109	0	0	0	161	MD02G1009600
MD02G1009700_1	Chr02:642138|642440	564.352	0	863.383	263.173	0	302	MD02G1009700
n/a_188	Chr02:6515842|6559108	2.62615	0	2.86315	22.5886	0	43266	n/a
n/a_189	Chr02:6605119|6606170	0	0	1172.01	0	0	1051	n/a
n/a_113	Chr02:6733|7463	0	1952	294.685	3276.02	402.677	730	n/a
n/a_190	Chr02:6875829|6903911	0	0	21.1196	116.747	0	28082	n/a
MD02G1088500_1	Chr02:6978006|6979523	0	0	146.458	0	0	623	MD02G1088500
MD02G1088500_2	Chr02:6981953|6982138	0	0	0	0	321.986	185	MD02G1088500
n/a_114	Chr02:7006|10489	0	24.5343	0	0	0	3483	n/a
MD02G1090100_1	Chr02:7146155|7146367	456.673	0	0	0	0	212	MD02G1090100
MD02G1090200_1	Chr02:7154426|7154636	0	271.279	0	0	0	210	MD02G1090200
n/a_191	Chr02:7241559|7271017	19.7192	153.29	37.1688	140.555	123.51	29458	n/a
MD02G1091900_1	Chr02:7299655|7300019	0	0	0	224.265	0	261	MD02G1091900
n/a_192	Chr02:7314511|7411893	0	0.973964	0	0	0	97382	n/a
MD02G1093500_1	Chr02:7442488|7442959	383.172	0	0	0	0	379	MD02G1093500
n/a_193	Chr02:7468111|7478467	98.7453	0	0	0	0	10356	n/a
n/a_194	Chr02:7468239|7478700	0	0	0	14.2009	0	10461	n/a
MD02G1094300_1	Chr02:7487296|7487744	0	0	0	0	166.39	358	MD02G1094300
MD02G1094600_1	Chr02:7501206|7501436	0	0	3494.12	0	0	107	MD02G1094600
MD02G1096100_1	Chr02:7600716|7600869	0	0	596.36	0	0	153	MD02G1096100
MD02G1096100_2	Chr02:7600723|7600908	0	0	493.206	316.396	0	185	MD02G1096100
MD02G1096600_1	Chr02:7630580|7630870	0	493.993	0	0	0	192	MD02G1096600
MD02G1096600_2	Chr02:7631455|7631721	0	0	764.607	0	499.169	179	MD02G1096600
MD02G1096700_1	Chr02:7638577|7638703	0	0	0	589.507	0	126	MD02G1096700
MD02G1097200_1	Chr02:7675559|7675788	402.949	0	0	0	0	229	MD02G1097200
n/a_195	Chr02:7677880|7747736	45.1661	34.0269	81.4477	26.1875	30.7571	69856	n/a
MD02G1097800_1	Chr02:7722009|7722267	0	0	0	0	237.496	258	MD02G1097800
n/a_196	Chr02:7725501|7727069	0	0	0	0	78.1556	1568	n/a
n/a_197	Chr02:7732432|7819288	0	0	0	15.6927	0	86856	n/a
n/a_198	Chr02:7737972|7820261	17.6947	24.1651	6.13893	11.3862	14.2059	82289	n/a
n/a_199	Chr02:7746059|7820849	1.51923	7.30507	3.04998	3.01927	0	74790	n/a
n/a_200	Chr02:7766879|7844685	0	2.58867	0	2.11298	0	77806	n/a
n/a_201	Chr02:7766994|7845046	0	0	0	5.43078	0	78052	n/a
n/a_202	Chr02:7767574|7845629	0	0	0	0.678822	0	78055	n/a
n/a_203	Chr02:7830434|7855661	0	170.474	0	126.181	0	25227	n/a
n/a_204	Chr02:7830840|7855979	44.2885	77.9909	0	84.3044	0	25139	n/a
n/a_205	Chr02:7831219|7856466	0	116.173	0	95.5413	0	25247	n/a
n/a_206	Chr02:7832914|7861169	0	0	0	2.0716	0	28255	n/a
MD02G1012500_1	Chr02:783591|784074	0	0	0	0	231.222	265	MD02G1012500
MD02G1012500_2	Chr02:783591|791943	0	0	74.8049	0	0	1656	MD02G1012500
MD02G1012700_1	Chr02:797266|797963	0	0	0	0	138.004	444	MD02G1012700
n/a_207	Chr02:8007497|8021718	0	16.0238	0	30.2387	0	14221	n/a
n/a_208	Chr02:8010385|8023151	0	0	0	4.15051	0	12766	n/a
n/a_209	Chr02:8107118|8200400	0	13.26	0	0	23.3188	93282	n/a
MD02G1012900_1	Chr02:821945|824753	0	0	0	105.011	0	1061	MD02G1012900
MD02G1102700_1	Chr02:8240875|8241955	216.104	0	0	0	0	448	MD02G1102700
n/a_210	Chr02:8460461|8460644	793.563	0	0	0	0	183	n/a
n/a_211	Chr02:8485528|8543472	0	0	0	141.026	528.684	57944	n/a
n/a_212	Chr02:8486132|8544082	0	0	0	0	100.221	57950	n/a
n/a_213	Chr02:8487795|8545746	53.342	0	0	31.4795	122.437	57951	n/a
n/a_214	Chr02:8487968|8545907	324.082	0	0	77.5611	257.437	57939	n/a
n/a_215	Chr02:8488249|8546281	0	0	0	5.99277	0	58032	n/a
n/a_216	Chr02:8488542|8546465	0	0	0	17.1791	44.735	57923	n/a
n/a_217	Chr02:8488977|8546934	0	0	0	19.6939	64.7506	57957	n/a
n/a_218	Chr02:8516330|8538247	17.2551	0	0	0	0	21917	n/a
n/a_219	Chr02:8521784|8538733	19.3229	0	0	0	3.6152	16949	n/a
n/a_220	Chr02:8532071|8542061	1058.84	74.6483	182.851	497.988	1940.05	9990	n/a
n/a_221	Chr02:8532327|8542449	996.867	0	73.4303	146.571	2678.4	10122	n/a
n/a_222	Chr02:8537581|8541163	0	0	0	88.7528	0	3582	n/a
MD02G1105600_1	Chr02:8555516|8555828	0	0	0	0	291.781	210	MD02G1105600
n/a_122	Chr02:856855|857015	0	0	0	0	382.962	160	n/a
MD02G1106300_1	Chr02:8609774|8610063	0	197.123	0	0	0	289	MD02G1106300
n/a_223	Chr02:8611472|8619662	82.1934	33.5954	22.2816	51.2061	24.4611	8190	n/a
n/a_123	Chr02:868489|929465	0	10.7442	0	14.3429	0	60976	n/a
MD02G1109700_1	Chr02:8865643|8865794	0	0	0	350.897	0	151	MD02G1109700
MD02G1110500_1	Chr02:8989466|8989696	0	618.565	0	0	0	230	MD02G1110500
MD02G1113900_1	Chr02:9262003|9265897	0	0	0	52.7218	0	1005	MD02G1113900
MD02G1114500_1	Chr02:9312860|9313070	0	0	0	504.623	0	210	MD02G1114500
MD02G1115000_1	Chr02:9341736|9341982	0	0	0	0	242.144	246	MD02G1115000
MD02G1115100_1	Chr02:9355656|9355854	0	479.023	0	0	0	198	MD02G1115100
MD02G1116500_1	Chr02:9503726|9503931	0	565.664	604.278	0	0	205	MD02G1116500
n/a_224	Chr02:9530397|9546032	0	0	0	5.61559	3.80988	15635	n/a
MD02G1118500_1	Chr02:9613299|9615517	0	141.948	0	0	0	602	MD02G1118500
n/a_124	Chr02:962365|989332	0	0	0	0	26.9182	26967	n/a
MD02G1119100_1	Chr02:9656930|9659544	0	46.9651	0	0	0	1213	MD02G1119100
MD02G1119100_2	Chr02:9657122|9657899	341.699	272.85	0	0	0	425	MD02G1119100
MD02G1119100_3	Chr02:9657122|9658733	0	0	289.884	0	0	641	MD02G1119100
MD02G1119100_4	Chr02:9657122|9659280	218.75	120.542	0	0	0	962	MD02G1119100
MD02G1119100_5	Chr02:9657122|9659544	0	49.9287	159.935	0	0	1141	MD02G1119100
MD02G1119100_6	Chr02:9658869|9659544	0	284.54	0	0	0	500	MD02G1119100
MD02G1119300_1	Chr02:9665708|9666283	0	0	0	415.719	0	352	MD02G1119300
n/a_225	Chr02:9831806|9842171	32.2539	296.977	95.0774	212.665	20.6907	10365	n/a
MD02G1121800_1	Chr02:9920525|9920678	0	744.688	0	0	0	153	MD02G1121800
MD02G1121800_2	Chr02:9924408|9925055	0	0	480.227	0	0	190	MD02G1121800
MD02G1122100_1	Chr02:9945841|9947819	69.9409	0	0	0	0	1979	MD02G1122100
MD02G1122500_1	Chr02:9965287|9965446	0	358.293	0	0	0	159	MD02G1122500
n/a_393	Chr03:10066179|10066485	0	0	610.9	0	0	306	n/a
MD03G1000200_1	Chr03:10171|10366	473.207	0	0	0	0	195	MD03G1000200
n/a_326	Chr03:1030036|1094488	0	0.883892	0	0	0	64452	n/a
MD03G1116100_1	Chr03:10319796|10321603	255.61	0	0	0	0	361	MD03G1116100
MD03G1116800_1	Chr03:10490952|10493485	0	0	0	247.593	0	750	MD03G1116800
MD03G1117300_1	Chr03:10559573|10559804	0	334.664	0	0	0	231	MD03G1117300
MD03G1117500_1	Chr03:10574660|10575192	0	0	0	370.463	0	237	MD03G1117500
MD03G1118200_1	Chr03:10690092|10690386	0	788.851	0	0	0	294	MD03G1118200
MD03G1118200_2	Chr03:10690167|10690339	0	0	0	0	708.156	172	MD03G1118200
n/a_394	Chr03:10699185|10699359	530.318	0	0	0	0	174	n/a
MD03G1119200_1	Chr03:10903000|10911788	0	0	0	0	35.0122	2552	MD03G1119200
MD03G1119200_2	Chr03:10906700|10910069	0	0	0	129.707	0	817	MD03G1119200
n/a_395	Chr03:11293961|11295845	0	0	48.4305	0	86.2016	1884	n/a
MD03G1121600_1	Chr03:11306579|11309687	0	0	34.1223	0	0	2674	MD03G1121600
MD03G1121600_2	Chr03:11311348|11312875	0	0	73.4647	0	0	1242	MD03G1121600
MD03G1121600_3	Chr03:11314192|11318393	0	0	0	0	35.6905	1669	MD03G1121600
MD03G1121600_4	Chr03:11326769|11328037	0	0	0	0	143.466	1132	MD03G1121600
MD03G1125200_1	Chr03:11818360|11818524	0	0	1139.85	0	0	164	MD03G1125200
MD03G1125200_2	Chr03:11818365|11818524	0	596.52	0	0	0	159	MD03G1125200
n/a_396	Chr03:11878695|11911212	74.0923	0	0	0	0	32517	n/a
MD03G1015000_1	Chr03:1198236|1198808	0	0	0	229.542	0	255	MD03G1015000
MD03G1015000_2	Chr03:1199819|1201146	234.418	1068.96	0	0	0	413	MD03G1015000
MD03G1126800_1	Chr03:12169161|12171902	179.524	0	0	0	0	771	MD03G1126800
MD03G1127000_1	Chr03:12188663|12188958	0	255.465	0	0	0	223	MD03G1127000
n/a_327	Chr03:1221599|1272710	0	28.2502	8.50481	19.4295	0	51111	n/a
n/a_328	Chr03:1222935|1254714	0	0	0	15.8549	0	31779	n/a
n/a_329	Chr03:1224147|1255926	0	14.4686	0	4.67465	0	31779	n/a
n/a_330	Chr03:1226434|1257347	0	3.68574	0	0	0	30913	n/a
n/a_331	Chr03:1226434|1277176	6.54374	31.9814	7.90145	12.9796	3.0189	50742	n/a
MD03G1015400_1	Chr03:1227295|1228996	0	228.946	0	0	0	1013	MD03G1015400
n/a_332	Chr03:1228996|1257779	0	0	10.7596	0	0	28783	n/a
n/a_333	Chr03:1231747|1277938	0	2.46665	0	1.72064	0	46191	n/a
n/a_334	Chr03:1237381|1257347	49.7061	53.5527	59.7605	62.4908	17.8771	19966	n/a
n/a_335	Chr03:1259550|1276955	0	0	0	17.0705	0	17405	n/a
MD03G1129800_1	Chr03:12668815|12669130	432.209	0	814.671	261.309	0	224	MD03G1129800
n/a_397	Chr03:12690287|12773948	2.71627	0	0	0	0	83661	n/a
MD03G1130200_1	Chr03:12811510|12811953	0	0	0	0	179.689	341	MD03G1130200
MD03G1131700_1	Chr03:13003019|13003275	0	222.534	0	0	0	256	MD03G1131700
MD03G1133300_1	Chr03:13281690|13282682	0	0	0	191.053	0	416	MD03G1133300
MD03G1134200_1	Chr03:13401259|13402324	0	0	0	0	81.4877	731	MD03G1134200
MD03G1134200_2	Chr03:13401889|13402324	0	0	0	669.931	0	435	MD03G1134200
MD03G1001800_1	Chr03:137389|137563	556.406	0	0	0	0	174	MD03G1001800
n/a_336	Chr03:1377274|1443567	0	1.28902	0	0	0	66293	n/a
n/a_337	Chr03:1377367|1443660	2.78386	10.6121	10.2946	3.91786	0.898548	66293	n/a
MD03G1141100_1	Chr03:14861520|14861695	553.227	0	0	0	0	175	MD03G1141100
MD03G1141100_2	Chr03:14861583|14861883	0	0	0	390.221	0	300	MD03G1141100
n/a_398	Chr03:15120707|15122024	73.5116	0	0	0	0	1317	n/a
MD03G1142800_1	Chr03:15193378|15193592	431.193	0	0	0	0	214	MD03G1142800
MD03G1143400_1	Chr03:15379445|15380210	0	0	0	76.514	0	765	MD03G1143400
n/a_338	Chr03:1542643|1556423	0	0	0	0	18.4553	13780	n/a
MD03G1020600_1	Chr03:1590083|1591330	0	0	154.649	0	0	590	MD03G1020600
MD03G1145900_1	Chr03:15929857|15930063	0	0	0	0	431.648	207	MD03G1145900
MD03G1020700_1	Chr03:1594706|1595444	0	0	0	216.709	166.057	489	MD03G1020700
MD03G1147400_1	Chr03:16249174|16249363	488.229	0	0	0	0	189	MD03G1147400
MD03G1148600_1	Chr03:16543703|16546174	0	0	0	0	142.848	417	MD03G1148600
MD03G1150700_1	Chr03:16847533|16847827	0	0	0	0	202.61	294	MD03G1150700
MD03G1150700_2	Chr03:16847533|16849028	0	0	394.378	235.271	559.122	474	MD03G1150700
n/a_399	Chr03:17272066|17272198	0	0	0	401.405	0	132	n/a
MD03G1154000_1	Chr03:17599931|17601657	98.0899	0	0	0	0	987	MD03G1154000
MD03G1154600_1	Chr03:17730467|17730663	0	0	0	298.639	0	196	MD03G1154600
MD03G1156800_1	Chr03:18452185|18452921	518.401	0	0	0	0	178	MD03G1156800
MD03G1156800_2	Chr03:18452185|18458275	176.16	0	0	0	0	645	MD03G1156800
MD03G1156800_3	Chr03:18456319|18458926	313.862	0	0	0	0	294	MD03G1156800
MD03G1157000_1	Chr03:18608671|18609350	0	0	0	0	150.804	395	MD03G1157000
MD03G1157000_2	Chr03:18612008|18616888	0	0	0	0	244.618	494	MD03G1157000
MD03G1157000_3	Chr03:18620175|18621032	0	89.0135	285.135	0	0	640	MD03G1157000
MD03G1157200_1	Chr03:18665301|18665862	405.073	0	0	0	0	561	MD03G1157200
MD03G1158600_1	Chr03:18839135|18839288	1485.27	0	0	0	0	153	MD03G1158600
MD03G1159100_1	Chr03:18890792|18891193	0	0	872.373	0	0	284	MD03G1159100
MD03G1159100_2	Chr03:18890851|18891211	0	0	0	218.047	0	243	MD03G1159100
n/a_339	Chr03:1894225|1894441	427.201	0	0	0	0	216	n/a
MD03G1159500_1	Chr03:18994908|18995156	0	0	0	854.604	0	248	MD03G1159500
MD03G1159600_1	Chr03:19042797|19043683	0	0	205.734	0	0	887	MD03G1159600
MD03G1159900_1	Chr03:19096595|19097740	0	0	0	84.6954	0	877	MD03G1159900
MD03G1159900_2	Chr03:19097604|19097801	468.403	0	0	0	0	197	MD03G1159900
MD03G1160600_1	Chr03:19276680|19278015	135.899	0	0	0	0	679	MD03G1160600
MD03G1161100_1	Chr03:19415701|19416948	0	0	0	0	95.2939	643	MD03G1161100
MD03G1161700_1	Chr03:19548217|19549627	0	0	83.3271	0	0	1095	MD03G1161700
MD03G1161700_2	Chr03:19557430|19560462	0	0	139.922	0	0	1336	MD03G1161700
MD03G1024500_1	Chr03:2032845|2033631	237.874	0	0	0	0	407	MD03G1024500
MD03G1024500_2	Chr03:2033916|2034751	221.019	0	0	0	0	835	MD03G1024500
MD03G1163500_1	Chr03:20367057|20367271	431.193	0	0	0	278.353	214	MD03G1163500
MD03G1163600_1	Chr03:20387863|20388294	375.103	385.555	370.907	0	0	246	MD03G1163600
MD03G1163600_2	Chr03:20391857|20392188	0	0	563.058	0	0	332	MD03G1163600
n/a_340	Chr03:2040880|2078717	0	8.60324	0	0	0	37837	n/a
MD03G1163800_1	Chr03:20433035|20434892	234.418	0	0	0	0	413	MD03G1163800
n/a_341	Chr03:2064589|2107872	0	0	0	1.83624	0	43283	n/a
MD03G1025100_1	Chr03:2076319|2077366	0	0	217.838	0	0	853	MD03G1025100
MD03G1025100_2	Chr03:2076492|2077366	0	0	0	0	569.01	764	MD03G1025100
n/a_342	Chr03:2089800|2131827	0	0	0	1.89112	0	42027	n/a
n/a_343	Chr03:2090789|2133103	0	0	0	1.38331	1.40775	42314	n/a
n/a_344	Chr03:2094887|2137408	0	6.05835	0	4.818	1.44103	42521	n/a
n/a_345	Chr03:2100832|2152541	0	13.4535	0	4.92229	0	51709	n/a
MD03G1002900_1	Chr03:214354|214583	0	414.177	0	0	0	229	MD03G1002900
MD03G1164700_1	Chr03:21708825|21709041	44952.1	395.615	1147.01	0	0	216	MD03G1164700
MD03G1164800_1	Chr03:21721126|21721938	0	0	0	0	223.628	274	MD03G1164800
MD03G1027100_1	Chr03:2183806|2183975	0	505.639	0	0	0	169	MD03G1027100
MD03G1027100_2	Chr03:2184370|2184544	653.005	0	0	0	0	174	MD03G1027100
MD03G1027100_3	Chr03:2184544|2184754	0	0	0	0	386.676	210	MD03G1027100
MD03G1165200_1	Chr03:21860165|21864596	0	0	0	0	110.179	737	MD03G1165200
n/a_400	Chr03:22242632|22242814	0	0	1002.67	0	0	182	n/a
n/a_401	Chr03:22357590|22372673	15.2946	0	9.0741	0	9.98642	15083	n/a
n/a_402	Chr03:22357590|22372963	0	0	0	0	5.28211	15373	n/a
n/a_403	Chr03:22369724|22385034	0	16.7346	0	14.5681	0	15310	n/a
n/a_404	Chr03:22369749|22385058	0	0	8.09177	0	0	15309	n/a
MD03G1168700_1	Chr03:22808784|22809210	0	0	214.186	0	0	426	MD03G1168700
MD03G1168800_1	Chr03:22815187|22815388	481.665	0	0	0	0	201	MD03G1168800
MD03G1168800_2	Chr03:22816509|22816796	0	296.712	0	0	0	288	MD03G1168800
MD03G1168800_3	Chr03:22819414|22821316	0	0	0	0	380.623	939	MD03G1168800
MD03G1168800_4	Chr03:22832567|22834419	0	90.7866	0	69.96	48.8239	1255	MD03G1168800
n/a_405	Chr03:23088253|23088520	0	0	695.938	0	0	267	n/a
MD03G1170900_1	Chr03:23211186|23212385	0	216.545	0	0	0	438	MD03G1170900
MD03G1171100_1	Chr03:23222244|23231334	0	35.2459	0	0	0	2691	MD03G1171100
n/a_406	Chr03:23223833|23257459	0	119.102	0	17.333	0	33626	n/a
n/a_407	Chr03:23223884|23258080	0	8.09152	0	7.76764	0	34196	n/a
MD03G1171100_2	Chr03:23224491|23225139	213.6	0	0	0	0	648	MD03G1171100
n/a_408	Chr03:23226102|23258159	26.2945	0	0	0	8.19079	32057	n/a
n/a_409	Chr03:23226635|23260799	0	2.50126	0	0	0	34164	n/a
n/a_410	Chr03:23229103|23263259	3.32659	2.50184	0	0	0	34156	n/a
n/a_411	Chr03:23229393|23263540	4.25285	8.37823	0	4.74647	0	34147	n/a
n/a_412	Chr03:23230156|23263620	36.4573	0	0	0	0	33464	n/a
MD03G1171800_1	Chr03:23370088|23370465	0	0	0	212.848	0	275	MD03G1171800
MD03G1172000_1	Chr03:23403370|23403917	0	0	0	851.392	0	275	MD03G1172000
MD03G1172300_1	Chr03:23501249|23502775	0	57.6022	0	0	0	989	MD03G1172300
n/a_413	Chr03:23505054|23505855	0	106.683	0	0	0	801	n/a
MD03G1172500_1	Chr03:23527220|23533097	0	100.269	0	0	0	771	MD03G1172500
MD03G1172500_2	Chr03:23530833|23534825	58.3925	0	0	0	0	1658	MD03G1172500
MD03G1172500_3	Chr03:23531925|23534825	0	0	0	0	105.243	566	MD03G1172500
n/a_346	Chr03:2354286|2361619	0	0	0	52.8073	0	7333	n/a
n/a_347	Chr03:2354913|2362148	0	157.481	0	751.695	0	7235	n/a
n/a_348	Chr03:2356088|2363174	32.5555	639.932	1446.95	10.4823	0	7086	n/a
MD03G1003300_1	Chr03:236002|236155	742.633	0	0	0	0	153	MD03G1003300
n/a_414	Chr03:23673319|23683284	9.25994	0	0	0	0	9965	n/a
MD03G1173300_1	Chr03:23681570|23684266	0	0	0	0	117.608	1042	MD03G1173300
n/a_415	Chr03:23797764|23797971	0	458.196	0	0	0	207	n/a
MD03G1173900_1	Chr03:23799173|23800282	0	0	370.889	0	0	668	MD03G1173900
MD03G1174600_1	Chr03:23870683|23871192	0	0	0	0	132.963	448	MD03G1174600
MD03G1174800_1	Chr03:23899312|23899463	641.157	0	0	0	0	151	MD03G1174800
MD03G1176600_1	Chr03:24231648|24231824	0	323.685	0	0	0	176	MD03G1176600
MD03G1000500_1	Chr03:24242|24409	552.547	0	0	0	0	167	MD03G1000500
n/a_349	Chr03:2429254|2443679	23.4906	0	0	0	0	14425	n/a
n/a_416	Chr03:24304851|24305030	0	0	0	490.502	0	179	n/a
MD03G1178500_1	Chr03:24548714|24549421	183.263	0	0	0	0	620	MD03G1178500
n/a_350	Chr03:2475441|2487984	0	0	0	0	4.88511	12543	n/a
n/a_417	Chr03:24828369|24869217	0	0	2.23372	0	0	40848	n/a
n/a_418	Chr03:24828369|24914226	0	0.663529	0	0	0	85857	n/a
n/a_419	Chr03:24841694|24844265	37.6564	0	0	0	0	2571	n/a
n/a_420	Chr03:24869329|24913998	0	0	0	2.49428	0	44669	n/a
n/a_421	Chr03:24882205|24927824	0	0	0	0	5.22304	45619	n/a
MD03G1030700_1	Chr03:2490805|2491959	0	0	0	134.709	0	590	MD03G1030700
MD03G1183500_1	Chr03:25033954|25035151	0	171.513	0	0	0	553	MD03G1183500
MD03G1003500_1	Chr03:252883|253081	0	1366.55	0	0	0	198	MD03G1003500
MD03G1003500_2	Chr03:252891|253066	0	662.635	0	0	0	175	MD03G1003500
MD03G1003500_3	Chr03:253229|253821	0	240.577	0	0	0	592	MD03G1003500
MD03G1031700_1	Chr03:2548832|2549394	0	0	0	0	717.68	249	MD03G1031700
MD03G1186700_1	Chr03:25513470|25513628	719.132	900.442	577.488	0	0	158	MD03G1186700
MD03G1186700_2	Chr03:25513869|25514052	0	0	0	608.835	0	183	MD03G1186700
MD03G1003500_4	Chr03:255562|255752	0	406.881	0	0	0	190	MD03G1003500
MD03G1187000_1	Chr03:25560755|25561764	0	0	0	314.454	0	337	MD03G1187000
MD03G1003500_5	Chr03:255941|256121	0	3121.45	1702.02	2756.01	340.411	180	MD03G1003500
Apple_newGene_27815_1	Chr03:25744121|25744286	0	468.53	0	0	0	165	Apple_newGene_27815
Apple_newGene_27815_2	Chr03:25744209|25749687	0	0	0	0	22.2349	5478	Apple_newGene_27815
MD03G1191000_1	Chr03:26264010|26264178	0	508.648	0	0	0	168	MD03G1191000
MD03G1191400_1	Chr03:26286796|26287047	0	0	0	443.892	0	251	MD03G1191400
n/a_422	Chr03:26297306|26324247	0	0	6.93869	0	0	26941	n/a
n/a_351	Chr03:2629886|2635584	449.375	534.908	373.764	330.243	192.525	5698	n/a
n/a_423	Chr03:26310297|26336750	0	0	0	40.9268	0	26453	n/a
n/a_424	Chr03:26310772|26336846	0	0	0	119.654	0	26074	n/a
n/a_352	Chr03:2637516|2697073	14.2449	13.5886	15.488	0	15.7606	59557	n/a
MD03G1192300_1	Chr03:26398304|26399916	0	0	0	142.764	0	615	MD03G1192300
n/a_353	Chr03:2640942|2700345	0	0.959019	0	0	0	59403	n/a
MD03G1193000_1	Chr03:26540921|26541431	180.932	0	0	0	0	510	MD03G1193000
MD03G1003600_1	Chr03:269584|270184	0	316.155	0	0	0	600	MD03G1003600
MD03G1197400_1	Chr03:26959714|26959915	565.288	0	0	0	0	201	MD03G1197400
MD03G1197400_2	Chr03:26959910|26960791	0	0	0	170.189	0	467	MD03G1197400
MD03G1199000_1	Chr03:27239326|27239479	0	0	0	0	389.33	153	MD03G1199000
MD03G1199100_1	Chr03:27260003|27260177	0	0	1854.48	0	0	174	MD03G1199100
MD03G1199100_2	Chr03:27260177|27260351	0	818.515	0	853.769	0	174	MD03G1199100
MD03G1199100_3	Chr03:27260177|27260438	370.938	0	0	0	0	261	MD03G1199100
n/a_425	Chr03:27301994|27302308	0	0	0	168.743	0	314	n/a
MD03G1034300_1	Chr03:2746962|2748082	0	0	1999.31	0	0	187	MD03G1034300
MD03G1034300_2	Chr03:2746962|2749693	0	0	1476.43	0	262.789	309	MD03G1034300
MD03G1034300_3	Chr03:2746962|2755122	40.1966	0	118.141	0	0	5739	MD03G1034300
MD03G1034300_4	Chr03:2746979|2755047	0	0	16.1578	0	0	5647	MD03G1034300
MD03G1034300_5	Chr03:2747259|2747414	624.611	0	0	0	0	155	MD03G1034300
n/a_426	Chr03:27601103|27612581	0	0	0	0	77.8456	11478	n/a
n/a_427	Chr03:27601489|27613328	0	0	0	0	89.165	11839	n/a
n/a_428	Chr03:27604102|27615621	0	0	63.3688	0	0	11519	n/a
n/a_354	Chr03:2762539|2775672	0	0	9.43249	0	0	13133	n/a
MD03G1203100_1	Chr03:27718586|27718801	528.479	0	0	0	0	215	MD03G1203100
MD03G1203500_1	Chr03:27827613|27827822	0	680.717	0	0	0	209	MD03G1203500
MD03G1203900_1	Chr03:27853883|27854227	0	224.731	0	0	0	344	MD03G1203900
MD03G1203900_2	Chr03:27853883|27854552	0	200.712	277.751	0	0	669	MD03G1203900
MD03G1205600_1	Chr03:28152596|28153609	0	139.892	0	0	0	678	MD03G1205600
n/a_429	Chr03:28265461|28298277	166.688	0	0	0	0	32816	n/a
MD03G1208100_1	Chr03:28718416|28719288	0	0	0	0	131.014	682	MD03G1208100
MD03G1208900_1	Chr03:28806989|28807150	0	1767.33	0	0	0	161	MD03G1208900
MD03G1209000_1	Chr03:28814320|28816036	0	0	0	0	126.338	485	MD03G1209000
MD03G1036400_1	Chr03:2885346|2889327	0	0	0	85.3227	0	621	MD03G1036400
MD03G1209800_1	Chr03:28907351|28909240	0	0	0	79.4384	0	667	MD03G1209800
MD03G1210100_1	Chr03:28924703|28925192	0	0	0	0	409.687	489	MD03G1210100
MD03G1210100_2	Chr03:28924916|28925192	0	0	0	0	215.824	276	MD03G1210100
MD03G1210100_3	Chr03:28926056|28926299	0	0	0	0	367.7	243	MD03G1210100
MD03G1210100_4	Chr03:28926102|28926345	0	0	0	0	868.502	243	MD03G1210100
MD03G1210100_5	Chr03:28926195|28926345	0	0	0	0	3211.06	150	MD03G1210100
MD03G1210100_6	Chr03:28926222|28926437	0	264.97	0	0	284.995	215	MD03G1210100
MD03G1036600_1	Chr03:2908131|2908356	0	343.589	0	0	0	225	MD03G1036600
MD03G1036600_2	Chr03:2908131|2908386	361.864	0	0	0	0	255	MD03G1036600
MD03G1036600_3	Chr03:2908140|2908422	0	0	0	0	217.284	282	MD03G1036600
MD03G1036600_4	Chr03:2908282|2908452	0	0	536.724	0	0	170	MD03G1036600
MD03G1214100_1	Chr03:29382707|29384068	225.144	0	0	0	0	757	MD03G1214100
MD03G1214700_1	Chr03:29484036|29484303	518.401	0	0	0	0	267	MD03G1214700
MD03G1037300_1	Chr03:2957892|2958066	979.508	0	0	0	0	174	MD03G1037300
n/a_355	Chr03:3003056|3087807	0	0	3.65414	0	0	84751	n/a
MD03G1216700_1	Chr03:30097301|30097487	0	306.283	0	0	0	186	MD03G1216700
MD03G1217200_1	Chr03:30143960|30145716	0	127.447	0	0	0	447	MD03G1217200
n/a_356	Chr03:3015770|3073362	6.56654	0	207.869	0	0	57592	n/a
MD03G1217600_1	Chr03:30224376|30224543	0	0	1483.56	0	0	167	MD03G1217600
MD03G1218200_1	Chr03:30262089|30262323	0	405.327	0	0	0	234	MD03G1218200
MD03G1218900_1	Chr03:30340044|30340323	0	0	1425.11	0	0	279	MD03G1218900
MD03G1218900_2	Chr03:30340044|30340346	0	255.985	5677.74	0	0	302	MD03G1218900
MD03G1219400_1	Chr03:30406668|30407724	0	0	0	0	92.7842	642	MD03G1219400
MD03G1219600_1	Chr03:30419060|30419472	0	138.273	0	0	0	412	MD03G1219600
MD03G1038300_1	Chr03:3041912|3045072	0	0	0	0	162.753	366	MD03G1038300
MD03G1219900_1	Chr03:30432411|30434545	0	60.2843	0	0	0	945	MD03G1219900
MD03G1219900_2	Chr03:30433996|30434545	0	0	0	137.08	0	427	MD03G1219900
n/a_430	Chr03:30589517|30589822	0	0	919.354	0	0	305	n/a
n/a_431	Chr03:30648881|30657143	0	268.838	0	90.9052	0	8262	n/a
MD03G1222300_1	Chr03:30655337|30655859	0	222.534	0	0	0	256	MD03G1222300
MD03G1222600_1	Chr03:30697837|30698015	0	0	0	0	684.285	178	MD03G1222600
MD03G1224000_1	Chr03:30919343|30919920	0	1154.34	1814.5	0	0	306	MD03G1224000
n/a_432	Chr03:31052836|31064477	166.312	1156.29	145.161	524.516	61.8225	11641	n/a
n/a_433	Chr03:31297069|31315819	0	0	0	4.23883	0	18750	n/a
n/a_434	Chr03:31297308|31316083	0	42.0551	0	41.2533	0	18775	n/a
MD03G1039300_1	Chr03:3132127|3132373	692.822	0	0	0	0	246	MD03G1039300
MD03G1039400_1	Chr03:3135233|3135416	0	311.304	0	0	0	183	MD03G1039400
MD03G1231300_1	Chr03:31695068|31696278	0	0	217.71	0	0	569	MD03G1231300
n/a_435	Chr03:31862713|31915300	0	0	0	1.51136	3.86036	52587	n/a
MD03G1234000_1	Chr03:31972591|31972750	0	0	1168.65	0	0	159	MD03G1234000
MD03G1236100_1	Chr03:32175316|32175475	0	0	860.784	0	0	159	MD03G1236100
MD03G1236500_1	Chr03:32195835|32196082	0	312.986	0	321.774	0	247	MD03G1236500
MD03G1004100_1	Chr03:322680|324722	0	0	153.503	0	0	1614	MD03G1004100
MD03G1240400_1	Chr03:32565540|32565717	0	0	0	330.696	0	177	MD03G1240400
n/a_436	Chr03:32579008|32589879	0	0	0	52.7307	0	10871	n/a
MD03G1041000_1	Chr03:3261609|3263150	0	0	729.221	0	0	295	MD03G1041000
MD03G1241400_1	Chr03:32629996|32633040	0	0	123.972	0	0	736	MD03G1241400
MD03G1241500_1	Chr03:32654334|32654497	0	1056.16	0	0	0	163	MD03G1241500
n/a_437	Chr03:32746961|32771202	0	0	11.5673	0	0	24241	n/a
n/a_357	Chr03:3275220|3279313	22.5447	0	0	0	0	4093	n/a
MD03G1244400_1	Chr03:33116285|33116423	0	0	1354.6	0	0	138	MD03G1244400
n/a_438	Chr03:33130434|33153351	0	10.3468	0	0	0	22917	n/a
n/a_439	Chr03:33143138|33158460	0	13.8091	0	23.5574	0	15322	n/a
n/a_440	Chr03:33144176|33159514	0	11.224	0	3.81622	0	15338	n/a
n/a_441	Chr03:33200587|33218034	7.93334	0	0	0	0	17447	n/a
MD03G1246200_1	Chr03:33324177|33325166	0	0	0	0	90.0242	902	MD03G1246200
MD03G1246300_1	Chr03:33333077|33336884	0	70.9399	0	0	0	1337	MD03G1246300
MD03G1246300_2	Chr03:33333289|33333421	0	0	0	443.433	0	132	MD03G1246300
MD03G1246300_3	Chr03:33335490|33336884	0	0	305.869	0	0	405	MD03G1246300
MD03G1250300_1	Chr03:33840668|33841006	0	0	0	235.142	0	338	MD03G1250300
n/a_442	Chr03:33891467|33900907	0	0	19.3312	0	0	9440	n/a
n/a_443	Chr03:33899982|33904122	0	0	0	0	14.3883	4140	n/a
MD03G1252200_1	Chr03:33974977|33975135	612.751	0	0	0	0	158	MD03G1252200
MD03G1043400_1	Chr03:3402666|3402846	0	0	0	0	340.411	180	MD03G1043400
n/a_444	Chr03:34381222|34381408	520.509	0	0	0	0	186	n/a
MD03G1258300_1	Chr03:34540868|34541032	0	0	0	0	495.133	164	MD03G1258300
MD03G1258500_1	Chr03:34557944|34559344	0	0	0	202.771	0	433	MD03G1258500
n/a_445	Chr03:34614725|34618803	0	34.8872	0	0	0	4078	n/a
n/a_358	Chr03:3462760|3477341	0	0	0	6.02152	0	14581	n/a
n/a_446	Chr03:34887741|34890085	298.622	121.52	277.229	234.392	0	2344	n/a
n/a_447	Chr03:34887986|34890294	391.617	416.062	568.235	88.7635	198.791	2308	n/a
MD03G1263200_1	Chr03:34903057|34903242	0	835.756	0	0	0	185	MD03G1263200
n/a_448	Chr03:35002221|35009996	191.395	0	311.08	0	0	7775	n/a
MD03G1044400_1	Chr03:3513088|3513295	0	275.211	0	0	0	207	MD03G1044400
MD03G1266300_1	Chr03:35146744|35146908	0	0	0	679.371	0	164	MD03G1266300
MD03G1271800_1	Chr03:35499812|35500289	848.508	0	0	821.847	0	394	MD03G1271800
MD03G1272700_1	Chr03:35610454|35612682	0	0	0	0	65.7478	1359	MD03G1272700
MD03G1272700_2	Chr03:35611690|35612273	0	0	0	0	325.505	366	MD03G1272700
MD03G1274300_1	Chr03:35724918|35725173	723.728	0	0	0	0	255	MD03G1274300
n/a_449	Chr03:35754935|35767790	0	0	0	9.10668	0	12855	n/a
MD03G1276700_1	Chr03:35922139|35922328	512.247	301.421	0	0	0	189	MD03G1276700
MD03G1277100_1	Chr03:35959568|35959674	0	0	1763.54	0	0	106	MD03G1277100
MD03G1277600_1	Chr03:35980354|35980912	173.503	0	0	0	0	558	MD03G1277600
n/a_450	Chr03:36074784|36122075	0	2.40928	0	1.68062	0	47291	n/a
n/a_451	Chr03:36078451|36126044	0	94.9759	0	59.5037	0	47593	n/a
n/a_452	Chr03:36148026|36153251	0	109.031	113.151	124.929	0	5225	n/a
MD03G1282000_1	Chr03:36264193|36264395	0	469.538	0	0	0	202	MD03G1282000
n/a_453	Chr03:36286431|36286650	0	0	0	534.55	0	219	n/a
MD03G1282700_1	Chr03:36305540|36311119	0	57.2915	0	107.456	0	5182	MD03G1282700
MD03G1285800_1	Chr03:36543626|36544911	0	0	0	0	135.381	440	MD03G1285800
MD03G1045600_1	Chr03:3658915|3659120	0	0	0	362.331	0	205	MD03G1045600
n/a_454	Chr03:36596334|36622026	0	3.00901	0	3.4174	0	25692	n/a
n/a_455	Chr03:36604088|36623687	0	0	0	28.4241	0	19599	n/a
n/a_456	Chr03:36631705|36633955	1140.26	0	0	0	0	2250	n/a
n/a_457	Chr03:36631963|36634436	18785.4	6047.05	3474.48	8486.73	17215	2473	n/a
n/a_458	Chr03:36631963|36643265	2575.02	904.128	961.641	1264.25	2018.96	11302	n/a
n/a_459	Chr03:36632156|36643593	0	0	0	6.94921	0	11437	n/a
n/a_460	Chr03:36633778|36637857	0	0	0	0	29.2069	4079	n/a
n/a_461	Chr03:36633860|36637817	1512.68	3939.69	431.445	3175.44	8183.81	3957	n/a
n/a_462	Chr03:36633863|36637817	57.4724	0	0	0	0	3954	n/a
n/a_463	Chr03:36634572|36643265	0	173.415	0	0	475.784	8693	n/a
MD03G1287500_1	Chr03:36655076|36655229	603.107	0	0	0	0	153	MD03G1287500
n/a_464	Chr03:36760535|36766408	0	52.6528	0	0	0	5873	n/a
n/a_465	Chr03:36762870|36779189	0	4.73727	0	0	0	16319	n/a
n/a_466	Chr03:36764425|36781003	19.4815	0	33.6257	0	0	16578	n/a
n/a_467	Chr03:36767399|36777745	0	13.7659	26.8875	33.1411	26.3213	10346	n/a
n/a_468	Chr03:36800734|36808778	0	38.4423	0	0	0	8044	n/a
MD03G1291500_1	Chr03:36901702|36901885	0	0	1015.95	0	0	184	MD03G1291500
MD03G1291500_2	Chr03:36902926|36903320	0	0	694.745	0	0	394	MD03G1291500
Apple_newGene_29122_1	Chr03:36919618|36919772	0	0	0	344.061	0	154	Apple_newGene_29122
MD03G1292100_1	Chr03:36925728|36926042	0	0	0	0	284.558	314	MD03G1292100
n/a_469	Chr03:36931422|36931572	0	0	0	0	408.493	150	n/a
MD03G1292300_1	Chr03:36932135|36932306	0	0	0	0	472.104	172	MD03G1292300
n/a_470	Chr03:37007126|37021931	0	0	111.859	0	0	14805	n/a
n/a_471	Chr03:37051086|37051236	0	0	608.288	0	0	150	n/a
MD03G1294400_1	Chr03:37063183|37063650	0	0	730.216	0	159.568	384	MD03G1294400
MD03G1047100_1	Chr03:3796429|3796801	0	207.259	0	0	0	373	MD03G1047100
n/a_359	Chr03:3853848|3946372	3.07009	0	2.0204	0	0	92524	n/a
n/a_360	Chr03:3854591|3949531	21.8102	57.7507	15.404	53.7504	4.89264	94940	n/a
n/a_361	Chr03:3889069|3923118	0	0	0	72.8064	0	34049	n/a
n/a_362	Chr03:3890284|3924525	6.63666	0	0	0	0	34241	n/a
MD03G1048900_1	Chr03:3934878|3935030	0	0	0	0	403.118	152	MD03G1048900
n/a_363	Chr03:3945110|3956427	56.8686	5.0339	66.8256	9.84509	37.5233	11317	n/a
n/a_364	Chr03:3945121|3956241	0	0	33.42	0	5.51025	11120	n/a
n/a_365	Chr03:3945121|3956427	235.745	8.38905	147.82	0	124.287	11306	n/a
n/a_366	Chr03:3945121|3957131	0	0	15.565	0	0	12010	n/a
n/a_367	Chr03:3945131|3956427	10.0587	0	0	0	5.27332	11296	n/a
MD03G1049800_1	Chr03:3976158|3976313	936.917	0	0	0	0	155	MD03G1049800
n/a_368	Chr03:4014583|4019573	0	0	0	0	11.9374	4990	n/a
n/a_369	Chr03:4077189|4096439	0	0	0	21.2223	0	19250	n/a
n/a_370	Chr03:4090214|4113832	0	34.1055	0	299.766	0	23618	n/a
MD03G1052500_1	Chr03:4189564|4190719	0	93.3912	0	0	0	610	MD03G1052500
MD03G1052900_1	Chr03:4234877|4236021	268.557	0	0	0	0	721	MD03G1052900
MD03G1052900_2	Chr03:4235397|4235562	0	468.53	0	354.747	0	165	MD03G1052900
MD03G1052900_3	Chr03:4236874|4237079	554.258	0	0	0	0	205	MD03G1052900
MD03G1055400_1	Chr03:4426765|4426956	0	0	0	416.116	0	191	MD03G1055400
MD03G1055800_1	Chr03:4435262|4435424	0	0	0	0	367.7	162	MD03G1055800
MD03G1000900_1	Chr03:45238|46394	0	0	0	0	134.161	444	MD03G1000900
MD03G1057400_1	Chr03:4580048|4580405	0	0	0	0	377.009	158	MD03G1057400
MD03G1057400_2	Chr03:4580373|4581317	0	0	0	0	77.3604	770	MD03G1057400
MD03G1005700_1	Chr03:465972|466123	752.469	0	0	0	0	151	MD03G1005700
MD03G1058800_1	Chr03:4742570|4743221	0	0	419.138	0	0	446	MD03G1058800
n/a_371	Chr03:5085991|5103422	5.55417	22.0592	10.7243	13.1137	0	17431	n/a
n/a_372	Chr03:5086357|5103783	0	0	24.8806	0	0	17426	n/a
n/a_373	Chr03:5086833|5103422	172.574	183.089	210.457	130.15	120.242	16589	n/a
n/a_374	Chr03:5087498|5104146	0	0	8.22109	0	9.75515	16648	n/a
MD03G1066000_1	Chr03:5282121|5282310	0	0	0	393.005	0	189	MD03G1066000
Apple_newGene_25728_1	Chr03:5324396|5331908	0	0	0	132.775	0	7512	Apple_newGene_25728
n/a_375	Chr03:5372253|5383458	0	0	91.7577	0	0	11205	n/a
n/a_376	Chr03:5372484|5383689	0	0	20.3577	0	0	11205	n/a
MD03G1068500_1	Chr03:5567836|5568028	1775.36	0	0	0	0	192	MD03G1068500
MD03G1068500_2	Chr03:5569021|5569192	0	333.15	0	0	0	171	MD03G1068500
n/a_377	Chr03:5675813|5683565	59.5171	0	0	0	0	7752	n/a
MD03G1071900_1	Chr03:5852817|5854289	0	117.968	0	0	0	804	MD03G1071900
MD03G1071900_2	Chr03:5852926|5853106	1578.1	0	0	0	0	108	MD03G1071900
MD03G1007400_1	Chr03:591734|592805	0	78.0095	0	0	0	991	MD03G1007400
MD03G1007400_2	Chr03:596273|596442	1008.49	0	0	0	0	169	MD03G1007400
MD03G1075900_1	Chr03:6158975|6159137	569.601	0	0	0	0	162	MD03G1075900
n/a_378	Chr03:6261323|6265348	802.673	791.43	828.699	996.401	1278.25	4025	n/a
MD03G1077300_1	Chr03:6277484|6277754	683.521	0	0	0	0	270	MD03G1077300
MD03G1078000_1	Chr03:6324457|6324896	0	0	425.821	0	0	439	MD03G1078000
n/a_379	Chr03:6397107|6411282	127.492	256.678	30.5869	163.13	0	14175	n/a
n/a_380	Chr03:6404006|6410005	32.277	116.301	0	58.5429	0	5999	n/a
n/a_381	Chr03:6404587|6410058	0	395.651	0	0	0	5471	n/a
n/a_382	Chr03:6407269|6410876	0	90.593	0	40.5692	0	3607	n/a
MD03G1079900_1	Chr03:6440598|6440792	0	488.9	0	0	0	194	MD03G1079900
n/a_383	Chr03:6519061|6528978	0	37.6695	0	0	0	9917	n/a
n/a_322	Chr03:664018|759770	0	3.96218	0	0	0	95752	n/a
MD03G1083600_1	Chr03:6768854|6769740	0	0	0	0	156.511	783	MD03G1083600
MD03G1085100_1	Chr03:6868754|6868958	0	0	0	717.318	0	204	MD03G1085100
n/a_384	Chr03:6938165|6983820	0	438.29	0	0	0	45655	n/a
MD03G1088100_1	Chr03:7280877|7281452	0	0	0	0	130.648	469	MD03G1088100
n/a_385	Chr03:7300861|7308846	0	0	0	0	111.268	7985	n/a
MD03G1088400_1	Chr03:7306034|7308044	0	0	89.636	0	0	1382	MD03G1088400
MD03G1089900_1	Chr03:7393025|7393293	0	0	697.52	0	0	268	MD03G1089900
MD03G1090000_1	Chr03:7420859|7421059	0	0	0	264.927	0	200	MD03G1090000
n/a_323	Chr03:759474|780117	0	0	0	0	2.8856	20643	n/a
MD03G1009900_1	Chr03:760864|761030	0	0	0	638.379	0	166	MD03G1009900
n/a_324	Chr03:761136|787132	0	12.1308	0	16.9342	0	25996	n/a
n/a_325	Chr03:761985|787761	0	12.8788	0	0	0	25776	n/a
MD03G1092700_1	Chr03:7764353|7764724	0	280.099	0	0	0	276	MD03G1092700
MD03G1092700_2	Chr03:7764353|7765011	327.799	539.308	1042.21	471	108.835	563	MD03G1092700
MD03G1010400_1	Chr03:802840|803000	0	0	0	0	558.445	160	MD03G1010400
MD03G1094800_1	Chr03:8028883|8029220	0	0	0	314.454	0	337	MD03G1094800
n/a_386	Chr03:8046395|8069300	0	0	0	7.07608	0	22905	n/a
MD03G1096200_1	Chr03:8146490|8146744	0	758.773	0	0	0	125	MD03G1096200
MD03G1096800_1	Chr03:8331763|8331961	0	390.442	0	0	0	198	MD03G1096800
MD03G1001300_1	Chr03:86018|87805	0	0	0	0	181.254	448	MD03G1001300
MD03G1103200_1	Chr03:8826059|8826609	176.027	0	0	0	0	550	MD03G1103200
MD03G1103300_1	Chr03:8833025|8834997	0	0	126.923	0	0	976	MD03G1103300
MD03G1103300_2	Chr03:8833025|8835735	0	0	82.2752	100.466	53.7128	1109	MD03G1103300
MD03G1103600_1	Chr03:8869018|8869183	0	0	0	0	361.015	165	MD03G1103600
n/a_387	Chr03:8958587|8976746	0	0	7.53702	0	0	18159	n/a
MD03G1106100_1	Chr03:9098345|9098542	0	0	628.817	0	0	197	MD03G1106100
MD03G1107100_1	Chr03:9219429|9227035	0	11.2335	0	11.542	0	7607	MD03G1107100
MD03G1108000_1	Chr03:9365588|9365794	0	0	907.453	0	0	206	MD03G1108000
n/a_388	Chr03:9398433|9408768	0	9.17722	0	0	0	10335	n/a
n/a_389	Chr03:9398433|9428603	284.34	0	275.1	0	0	30170	n/a
MD03G1109800_1	Chr03:9541019|9542109	307.348	0	0	0	0	315	MD03G1109800
n/a_390	Chr03:9702681|9704249	0	0	0	0	192.668	1568	n/a
MD03G1111700_1	Chr03:9736627|9736867	0	0	516.154	0	0	240	MD03G1111700
MD03G1112200_1	Chr03:9746850|9751236	0	0	0	73.9473	141.982	1721	MD03G1112200
n/a_391	Chr03:9935877|9942783	0	0	0	8.4757	0	6906	n/a
n/a_392	Chr03:9949026|9958442	0	9.07529	0	0	0	9416	n/a
MD04G1076800_1	Chr04:10351139|10351392	449.102	0	489.632	0	674.123	253	MD04G1076800
MD04G1009100_1	Chr04:1057353|1057741	0	0	0	0	212.757	288	MD04G1009100
MD04G1079000_1	Chr04:10844518|10847430	0	0	0	229.542	0	510	MD04G1079000
MD04G1079000_2	Chr04:10844710|10847430	289.117	196.711	0	2995.7	888.691	393	MD04G1079000
MD04G1079000_3	Chr04:10844710|10847789	0	0	158.408	0	0	576	MD04G1079000
MD04G1079000_4	Chr04:10845714|10849070	0	0	219.15	0	0	853	MD04G1079000
MD04G1009500_1	Chr04:1097067|1097260	0	491.433	0	0	0	193	MD04G1009500
n/a_475	Chr04:1102157|1106052	0	0	0	0	84.1132	3895	n/a
n/a_476	Chr04:1102601|1106717	0	0	0	117.3	0	4116	n/a
n/a_477	Chr04:1102601|1108279	0	10.0332	0	0	0	5678	n/a
MD04G1080700_1	Chr04:11147973|11148714	0	401.892	0	0	0	472	MD04G1080700
MD04G1081900_1	Chr04:11296953|11297789	0	0	0	0	102.294	599	MD04G1081900
MD04G1083900_1	Chr04:12183028|12184429	0	150.112	0	0	0	515	MD04G1083900
MD04G1083900_2	Chr04:12183062|12183264	0	0	0	289.768	0	202	MD04G1083900
MD04G1085600_1	Chr04:12404891|12405076	0	307.938	0	0	0	185	MD04G1085600
MD04G1086000_1	Chr04:12453839|12454087	0	0	367.916	0	0	248	MD04G1086000
MD04G1086100_1	Chr04:12531917|12532277	742.358	526.926	597.556	487.777	4213.68	360	MD04G1086100
n/a_478	Chr04:1279980|1343477	463.478	385.361	434.247	374.862	624.485	63497	n/a
n/a_511	Chr04:13542015|13542274	0	0	0	0	313.521	259	n/a
MD04G1012200_1	Chr04:1361653|1362409	0	0	163.642	0	0	757	MD04G1012200
MD04G1012800_1	Chr04:1416864|1418250	0	0	0	0	83.973	967	MD04G1012800
MD04G1012800_2	Chr04:1427252|1430651	0	0	0	0	24.0095	2481	MD04G1012800
MD04G1012800_3	Chr04:1427252|1432979	0	0	0	0	19.3246	4202	MD04G1012800
MD04G1012800_4	Chr04:1430438|1432979	0	29.4564	0	0	41.9865	1934	MD04G1012800
MD04G1012800_5	Chr04:1432829|1432979	0	379.791	0	0	0	150	MD04G1012800
MD04G1012800_6	Chr04:1434289|1436659	0	0	0	0	295.429	916	MD04G1012800
MD04G1001100_1	Chr04:143704|143874	0	0	1649.43	0	0	170	MD04G1001100
n/a_479	Chr04:1458387|1511433	0	0	0	2.49714	0	53046	n/a
n/a_480	Chr04:1459522|1512534	0	0	0	1.10415	0	53012	n/a
n/a_481	Chr04:1459581|1512313	0	0	0	8.03845	0	52732	n/a
MD04G1001100_2	Chr04:146071|146237	0	343.184	0	0	0	166	MD04G1001100
n/a_482	Chr04:1464398|1515359	0	2.63488	0	2.49727	0	50961	n/a
n/a_483	Chr04:1470615|1529754	0	20.0474	0	25.6929	0	59139	n/a
MD04G1013100_1	Chr04:1498242|1500010	0	106.778	0	0	0	1086	MD04G1013100
MD04G1013400_1	Chr04:1529509|1529698	0	0	655.434	0	0	189	MD04G1013400
MD04G1013400_2	Chr04:1533558|1534241	0	0	798.869	0	0	234	MD04G1013400
MD04G1013500_1	Chr04:1540461|1540644	529.042	0	0	0	0	183	MD04G1013500
MD04G1013500_2	Chr04:1541678|1542683	0	0	0	0	147.105	828	MD04G1013500
MD04G1014200_1	Chr04:1595386|1595575	0	0	0	0	1121.16	189	MD04G1014200
n/a_472	Chr04:16110|38490	0	0	0	0	2.66164	22380	n/a
MD04G1001200_1	Chr04:161127|161295	0	0	737.363	0	0	168	MD04G1001200
MD04G1092300_1	Chr04:16414159|16414333	0	0	711.937	0	0	174	MD04G1092300
MD04G1094400_1	Chr04:17220599|17221032	0	0	0	0	255.654	233	MD04G1094400
n/a_512	Chr04:17511858|17540994	552.402	167.648	0	132.592	147.711	29136	n/a
MD04G1016500_1	Chr04:1775885|1776072	493.451	304.645	731.897	0	0	187	MD04G1016500
MD04G1016500_2	Chr04:1778846|1779122	350.778	0	0	0	0	276	MD04G1016500
MD04G1098900_1	Chr04:18390619|18391440	0	0	616.948	0	0	606	MD04G1098900
MD04G1100500_1	Chr04:18588291|18588740	1128.7	0	0	0	0	151	MD04G1100500
MD04G1100900_1	Chr04:18656193|18656421	424.626	665.856	0	733.675	1209.35	228	MD04G1100900
MD04G1100900_2	Chr04:18656418|18656646	0	0	0	256.725	0	228	MD04G1100900
MD04G1100900_3	Chr04:18656471|18656699	1670.49	1789.57	814.98	1945.82	1329.23	228	MD04G1100900
MD04G1100900_4	Chr04:18656815|18657043	849.252	0	0	0	0	228	MD04G1100900
n/a_513	Chr04:18657155|18657462	0	556.697	0	0	0	307	n/a
MD04G1100900_5	Chr04:18657182|18657340	0	489.288	0	0	0	158	MD04G1100900
n/a_514	Chr04:18657627|18657877	0	0	0	211.942	0	250	n/a
Apple_newGene_30967_1	Chr04:18733652|18734487	110.509	0	0	0	0	835	Apple_newGene_30967
MD04G1110900_1	Chr04:19557464|19557762	0	318.277	306.185	0	0	298	MD04G1110900
MD04G1110900_2	Chr04:19557464|19558818	632.818	0	0	0	0	617	MD04G1110900
n/a_515	Chr04:19823366|19840943	0	124.556	0	72.328	0	17577	n/a
MD04G1113900_1	Chr04:19998460|19998655	0	0	0	450.255	0	195	MD04G1113900
MD04G1116800_1	Chr04:20216649|20216866	0	0	420.475	0	0	217	MD04G1116800
MD04G1117400_1	Chr04:20261848|20262051	0	934.449	0	0	0	203	MD04G1117400
MD04G1121200_1	Chr04:20747690|20748433	0	0	0	130.312	0	570	MD04G1121200
MD04G1121200_2	Chr04:20748463|20748613	0	569.686	0	0	0	150	MD04G1121200
n/a_516	Chr04:21160512|21160707	473.207	0	0	0	0	195	n/a
MD04G1125600_1	Chr04:21212787|21213209	0	183.193	0	0	0	422	MD04G1125600
MD04G1125600_2	Chr04:21212974|21213243	0	0	0	196.972	0	269	MD04G1125600
MD04G1125600_3	Chr04:21213180|21213558	0	0	241.384	0	0	378	MD04G1125600
MD04G1125600_4	Chr04:21213201|21213410	543.65	0	0	0	0	209	MD04G1125600
MD04G1125600_5	Chr04:21213210|21213558	0	0	0	0	440.186	348	MD04G1125600
MD04G1125600_6	Chr04:21213213|21213393	0	0	1032.31	0	0	180	MD04G1125600
MD04G1125600_7	Chr04:21213222|21213410	0	0	0	0	475.272	188	MD04G1125600
MD04G1125600_8	Chr04:21213243|21213410	0	0	0	0	550.365	167	MD04G1125600
MD04G1125600_9	Chr04:21213490|21213706	448.216	0	0	0	0	216	MD04G1125600
MD04G1126500_1	Chr04:21254469|21254679	0	406.919	0	0	0	210	MD04G1126500
MD04G1127400_1	Chr04:21335792|21336351	0	0	326.451	0	0	559	MD04G1127400
n/a_517	Chr04:21351151|21408324	7.94941	8.96783	0	0	4.28692	57173	n/a
n/a_518	Chr04:21368712|21428227	0	0	2.08144	0	0	59515	n/a
MD04G1129600_1	Chr04:21592221|21592465	0	0	0	304.418	0	244	MD04G1129600
MD04G1129800_1	Chr04:21603568|21603733	586.756	0	0	0	0	165	MD04G1129800
MD04G1129900_1	Chr04:21645522|21647580	0	0	129.607	0	0	1056	MD04G1129900
MD04G1130000_1	Chr04:21661135|21661482	265.923	0	0	0	0	347	MD04G1130000
MD04G1130900_1	Chr04:21788488|21790208	0	71.1219	0	0	0	801	MD04G1130900
MD04G1018900_1	Chr04:2179259|2180246	0	352.59	0	0	0	269	MD04G1018900
n/a_519	Chr04:21863610|21863785	0	0	707.868	0	0	175	n/a
MD04G1136900_1	Chr04:22448064|22448308	0	316.834	0	0	0	244	MD04G1136900
MD04G1137900_1	Chr04:22528643|22529071	0	0	0	0	275.775	324	MD04G1137900
MD04G1001900_1	Chr04:232009|232393	0	0	0	137.624	0	385	MD04G1001900
MD04G1143700_1	Chr04:23286405|23286612	0	275.211	0	0	0	207	MD04G1143700
MD04G1143700_2	Chr04:23287850|23288019	0	0	1079.8	0	0	169	MD04G1143700
n/a_520	Chr04:23346450|23346636	0	0	0	284.868	0	186	n/a
n/a_521	Chr04:23379254|23379466	0	447.39	0	0	0	212	n/a
MD04G1145300_1	Chr04:23419877|23420052	553.227	0	0	0	0	175	MD04G1145300
MD04G1146600_1	Chr04:23501726|23503227	0	0	0	0	125.67	474	MD04G1146600
MD04G1148400_1	Chr04:23672669|23672826	0	0	0	0	775.814	157	MD04G1148400
MD04G1148900_1	Chr04:23698589|23698746	587.741	0	0	0	0	157	MD04G1148900
MD04G1150900_1	Chr04:23970875|23971025	0	515.383	0	0	0	150	MD04G1150900
n/a_522	Chr04:24130130|24136019	0	0	31.7431	0	0	5889	n/a
n/a_523	Chr04:24365452|24384110	0	9.15992	4.8903	17.0707	0	18658	n/a
n/a_524	Chr04:24365910|24384618	0	0	0	11.9111	0	18708	n/a
n/a_525	Chr04:24637450|24716881	0	20.1604	0	1.77242	0	79431	n/a
MD04G1159300_1	Chr04:24750109|24750384	0	0	527.417	0	0	173	MD04G1159300
MD04G1021500_1	Chr04:2549732|2550071	285.589	0	0	0	0	339	MD04G1021500
MD04G1164200_1	Chr04:25505154|25506769	0	239.342	0	0	0	323	MD04G1164200
MD04G1168300_1	Chr04:25835082|25835269	0	304.645	0	0	0	187	MD04G1168300
MD04G1169500_1	Chr04:26019401|26020357	0	0	145.061	0	0	629	MD04G1169500
MD04G1169600_1	Chr04:26024820|26025980	0	316.155	0	0	0	300	MD04G1169600
MD04G1170200_1	Chr04:26086892|26087098	469.974	0	0	0	0	206	MD04G1170200
MD04G1171600_1	Chr04:26320618|26320786	0	0	0	696.824	0	168	MD04G1171600
n/a_484	Chr04:2638454|2660077	0	54.3056	0	41.131	0	21623	n/a
MD04G1174000_1	Chr04:26571744|26571995	452.681	0	0	0	0	251	MD04G1174000
MD04G1174500_1	Chr04:26596091|26597272	0	0	0	80.3004	0	925	MD04G1174500
MD04G1174800_1	Chr04:26610015|26610174	0	0	1175.69	0	0	159	MD04G1174800
MD04G1175700_1	Chr04:26679578|26679791	0	0	0	0	287.671	213	MD04G1175700
MD04G1175700_2	Chr04:26679578|26681018	295.167	0	0	0	0	984	MD04G1175700
MD04G1176200_1	Chr04:26706581|26706744	0	0	1146.84	0	0	163	MD04G1176200
MD04G1177500_1	Chr04:26877099|26877256	0	0	0	337.487	0	157	MD04G1177500
MD04G1023500_1	Chr04:2695534|2695939	0	308.947	1925.78	172.591	855.284	307	MD04G1023500
MD04G1181400_1	Chr04:27213963|27214893	0	0	150.318	0	0	607	MD04G1181400
MD04G1023800_1	Chr04:2739888|2742436	0	0	0	0	123.869	742	MD04G1023800
n/a_526	Chr04:27406445|27443885	0	12.1647	0	10.0111	0	37440	n/a
n/a_527	Chr04:27427969|27447572	0	0	0	0	3.03869	19603	n/a
MD04G1183100_1	Chr04:27446121|27446664	573.853	0	0	0	0	198	MD04G1183100
MD04G1185100_1	Chr04:27631365|27631621	0	452.973	0	0	0	256	MD04G1185100
n/a_528	Chr04:27665328|27670364	193.73	71.8822	55.6797	14.7494	321.106	5036	n/a
n/a_529	Chr04:27666192|27670745	20.2669	0	0	0	0	4553	n/a
n/a_530	Chr04:27727857|27742891	0	5.14217	0	0	0	15034	n/a
n/a_531	Chr04:27728066|27743151	75.3218	296.138	123.921	82.5427	34.9892	15085	n/a
n/a_532	Chr04:27729212|27744432	6.06277	0	0	0	0	15220	n/a
n/a_533	Chr04:27729671|27744779	26.3225	0	0	0	0	15108	n/a
n/a_534	Chr04:27729689|27744905	0	0	0	7.32235	0	15216	n/a
n/a_535	Chr04:27729987|27745121	0	60.2285	0	39.2641	0	15134	n/a
MD04G1187900_1	Chr04:27833200|27833550	0	0	0	0	170.193	350	MD04G1187900
MD04G1187900_2	Chr04:27834370|27834618	0	457.579	0	0	0	249	MD04G1187900
n/a_485	Chr04:2788156|2878235	0	0	0	3.23516	0	90079	n/a
MD04G1189400_1	Chr04:27978247|27980420	0	0	0	219.757	0	1014	MD04G1189400
n/a_536	Chr04:28108533|28119970	0	0	7.97789	0	0	11437	n/a
MD04G1194100_1	Chr04:28353632|28353785	632.776	0	0	0	0	153	MD04G1194100
MD04G1194100_2	Chr04:28354531|28355649	0	0	0	0	128.322	955	MD04G1194100
MD04G1194100_3	Chr04:28354538|28354697	0	895.733	0	0	0	159	MD04G1194100
MD04G1194100_4	Chr04:28354824|28355007	0	422.445	0	0	0	183	MD04G1194100
MD04G1194100_5	Chr04:28355269|28356328	0	0	0	99.5967	0	798	MD04G1194100
MD04G1194100_6	Chr04:28356736|28357326	0	0	1474.73	0	0	420	MD04G1194100
MD04G1194200_1	Chr04:28361040|28361923	0	0	211.705	0	0	883	MD04G1194200
MD04G1194200_2	Chr04:28362868|28363620	0	0	0	141.385	0	414	MD04G1194200
MD04G1194200_3	Chr04:28363311|28363620	0	256.615	0	0	0	222	MD04G1194200
MD04G1194600_1	Chr04:28377688|28378005	0	0	0	0	354.593	229	MD04G1194600
MD04G1196800_1	Chr04:28501167|28501964	0	0	0	373.505	0	612	MD04G1196800
MD04G1197000_1	Chr04:28519478|28519637	870.522	0	0	0	0	159	MD04G1197000
MD04G1198800_1	Chr04:28621068|28621291	509.52	0	0	0	0	223	MD04G1198800
n/a_537	Chr04:28665738|28670410	1471.43	1777.14	1179.91	707.861	1659.18	4672	n/a
n/a_538	Chr04:28666102|28670859	0	0	0	418.358	674.264	4757	n/a
MD04G1199800_1	Chr04:28667836|28668127	0	0	0	300.684	0	292	MD04G1199800
n/a_539	Chr04:28733480|28734138	0	234.977	0	0	0	658	n/a
MD04G1201200_1	Chr04:28738613|28740528	86.4001	0	0	0	0	1068	MD04G1201200
MD04G1201600_1	Chr04:28789919|28790094	0	0	707.868	0	0	175	MD04G1201600
n/a_540	Chr04:28827128|28827369	0	0	0	989.354	0	241	n/a
MD04G1202800_1	Chr04:28862922|28864277	254.107	0	0	0	0	762	MD04G1202800
n/a_541	Chr04:29014438|29030546	33.1822	0	0	0	0	16108	n/a
n/a_542	Chr04:29050491|29078133	0	34.9592	0	0	0	27642	n/a
MD04G1204900_1	Chr04:29107029|29107240	1114.82	0	0	352.028	435.597	211	MD04G1204900
MD04G1205000_1	Chr04:29112688|29115556	0	0	0	0	55.0148	1476	MD04G1205000
MD04G1205000_2	Chr04:29113452|29113947	231.848	572.549	1409.06	0	0	398	MD04G1205000
MD04G1205000_3	Chr04:29113452|29115556	0	0	0	85.4915	0	1027	MD04G1205000
n/a_543	Chr04:29123475|29157507	73.1426	0	97.5422	0	21.7513	34032	n/a
MD04G1205300_1	Chr04:29156545|29157287	0	0	241.476	0	0	513	MD04G1205300
MD04G1002300_1	Chr04:291738|294101	0	0	0	0	157.598	972	MD04G1002300
MD04G1002300_2	Chr04:291738|297720	0	36.9926	0	0	0	1540	MD04G1002300
MD04G1206500_1	Chr04:29225251|29225734	0	0	0	0	184.992	483	MD04G1206500
MD04G1206600_1	Chr04:29229937|29230124	607.609	0	662.444	397.208	0	187	MD04G1206600
MD04G1206600_2	Chr04:29230272|29230431	0	0	0	333.242	0	159	MD04G1206600
MD04G1207200_1	Chr04:29253493|29253654	0	0	566.728	0	380.584	161	MD04G1207200
MD04G1002300_3	Chr04:292792|297720	0	0	0	232.435	0	1323	MD04G1002300
MD04G1002300_4	Chr04:292792|298021	0	214.435	0	217.183	0	1467	MD04G1002300
MD04G1208400_1	Chr04:29336157|29338251	0	0	0	0	141.603	631	MD04G1208400
MD04G1208800_1	Chr04:29408575|29408872	0	0	0	0	412.619	297	MD04G1208800
MD04G1210800_1	Chr04:29521575|29521725	0	0	0	529.854	0	150	MD04G1210800
MD04G1213400_1	Chr04:29711366|29711530	0	521.054	0	0	0	164	MD04G1213400
MD04G1214700_1	Chr04:29789064|29789202	0	0	0	1076.49	0	138	MD04G1214700
MD04G1215000_1	Chr04:29806474|29806969	0	0	429.043	0	0	319	MD04G1215000
MD04G1216300_1	Chr04:29896495|29896727	0	0	0	227.405	0	233	MD04G1216300
n/a_544	Chr04:29898552|29899649	0	0	170.406	0	0	1097	n/a
MD04G1216600_1	Chr04:29915624|29915798	834.61	0	0	0	0	174	MD04G1216600
MD04G1216600_2	Chr04:29917111|29917563	267.465	0	0	0	0	345	MD04G1216600
MD04G1217000_1	Chr04:29965593|29965791	0	0	460.824	295.622	601.692	198	MD04G1217000
MD04G1217700_1	Chr04:30031651|30031959	0	0	0	241.162	0	308	MD04G1217700
n/a_545	Chr04:30081587|30088050	0	0	0	8.19827	0	6463	n/a
MD04G1025900_1	Chr04:3023662|3024946	364.725	0	0	0	0	253	MD04G1025900
MD04G1025900_2	Chr04:3025811|3026200	0	506.934	0	0	0	305	MD04G1025900
MD04G1221700_1	Chr04:30291225|30292477	0	0	0	72.1872	0	734	MD04G1221700
MD04G1222200_1	Chr04:30315850|30316096	0	0	503.565	0	0	246	MD04G1222200
MD04G1222500_1	Chr04:30330078|30330279	0	0	0	369.542	0	201	MD04G1222500
n/a_486	Chr04:3037879|3041431	121.376	223.081	338.628	635.833	495.793	3552	n/a
n/a_546	Chr04:30416798|30434249	0	0	0	850.145	0	17451	n/a
MD04G1224300_1	Chr04:30440110|30440262	747.519	762.902	0	0	0	152	MD04G1224300
MD04G1225500_1	Chr04:30546620|30548470	0	0	0	0	112.78	720	MD04G1225500
MD04G1225600_1	Chr04:30551496|30551721	504.991	0	0	0	0	225	MD04G1225600
MD04G1226500_1	Chr04:30604906|30605093	986.902	718.054	999.654	0	327.668	187	MD04G1226500
MD04G1227000_1	Chr04:30650943|30651985	0	0	118.884	0	0	1042	MD04G1227000
MD04G1228600_1	Chr04:30896321|30896612	332.697	0	0	0	0	291	MD04G1228600
n/a_487	Chr04:3096853|3140035	0	18.6104	0	0	0	43182	n/a
n/a_488	Chr04:3097075|3140948	0	10.2768	0	4.90195	0	43873	n/a
n/a_489	Chr04:3097166|3140929	0	7.00204	0	0	0	43763	n/a
MD04G1229500_1	Chr04:30975092|30975694	0	189.265	0	0	0	602	MD04G1229500
n/a_490	Chr04:3103132|3145653	0	0	0	141.099	0	42521	n/a
n/a_491	Chr04:3104508|3147085	0	12.7551	0	3.99159	0	42577	n/a
MD04G1230600_1	Chr04:31051183|31053167	163.958	0	0	0	0	693	MD04G1230600
n/a_547	Chr04:31069388|31069581	501.631	0	0	0	0	193	n/a
MD04G1231200_1	Chr04:31085651|31085901	0	0	0	297.112	0	250	MD04G1231200
MD04G1026800_1	Chr04:3112897|3113070	0	0	0	459.411	0	173	MD04G1026800
MD04G1232200_1	Chr04:31141108|31141466	0	159.13	0	2163.21	0	358	MD04G1232200
MD04G1232200_2	Chr04:31141108|31142254	0	262.356	0	0	0	442	MD04G1232200
MD04G1232200_3	Chr04:31141108|31143407	0	0	0	55.3084	0	958	MD04G1232200
n/a_492	Chr04:3114414|3148842	0	4.13239	0	0	0	34428	n/a
n/a_493	Chr04:3115225|3149634	0	24.9208	0	12.0327	0	34409	n/a
MD04G1232600_1	Chr04:31177467|31178561	0	503.432	0	0	0	471	MD04G1232600
n/a_548	Chr04:31258501|31258804	0	0	0	174.869	0	303	n/a
n/a_549	Chr04:31323435|31382228	96.7208	6.82525	576.1	0	1.5633	58793	n/a
MD04G1235300_1	Chr04:31433455|31433678	413.791	0	0	0	0	223	MD04G1235300
MD04G1235400_1	Chr04:31441735|31441936	565.288	0	0	0	0	201	MD04G1235400
n/a_550	Chr04:31574794|31600563	6.61393	0	27.074	0	9.41193	25769	n/a
n/a_551	Chr04:31574940|31600563	0	0	0	0	40.6834	25623	n/a
MD04G1027600_1	Chr04:3158811|3159052	401.721	0	0	0	0	241	MD04G1027600
MD04G1027600_2	Chr04:3161488|3161909	0	0	216.73	0	0	421	MD04G1027600
MD04G1241500_1	Chr04:31860506|31860660	0	0	0	482.324	0	154	MD04G1241500
MD04G1241500_2	Chr04:31865562|31865776	0	0	0	347.093	0	214	MD04G1241500
MD04G1241600_1	Chr04:31869646|31869796	0	1139.37	0	0	0	150	MD04G1241600
n/a_552	Chr04:31870171|31872078	48.3877	0	0	0	0	1907	n/a
MD04G1241700_1	Chr04:31870621|31871517	0	109.555	0	0	0	520	MD04G1241700
n/a_553	Chr04:31926714|31976170	0	0	2.50479	0	0	49456	n/a
n/a_554	Chr04:31967656|31974703	0	0	25.8956	0	0	7047	n/a
MD04G1244100_1	Chr04:32040341|32041305	0	0	0	141.385	0	621	MD04G1244100
MD04G1244400_1	Chr04:32055825|32056167	0	0	724.427	0	0	342	MD04G1244400
MD04G1244500_1	Chr04:32065428|32065724	0	577.385	0	0	0	296	MD04G1244500
MD04G1028300_1	Chr04:3219730|3220117	361.249	0	0	0	0	268	MD04G1028300
MD04G1247400_1	Chr04:32209622|32212696	0	0	65.5012	0	0	1393	MD04G1247400
MD04G1248400_1	Chr04:32281008|32282870	0	0	701.446	0	0	533	MD04G1248400
MD04G1028600_1	Chr04:3238412|3238610	1721.56	0	0	0	0	198	MD04G1028600
MD04G1028800_1	Chr04:3256484|3257108	0	210.303	274.672	0	0	451	MD04G1028800
MD04G1028800_2	Chr04:3256708|3258319	0	0	0	173.175	0	507	MD04G1028800
MD04G1030300_1	Chr04:3412096|3412285	0	1161.78	0	0	0	189	MD04G1030300
MD04G1030500_1	Chr04:3417867|3424414	39.484	21.0189	0	0	0	3678	MD04G1030500
MD04G1031100_1	Chr04:3470907|3471838	0	0	0	0	63.9822	931	MD04G1031100
MD04G1031100_2	Chr04:3471612|3471774	0	0	0	327.07	0	162	MD04G1031100
MD04G1031100_3	Chr04:3475091|3475313	0	0	0	0	731.548	222	MD04G1031100
MD04G1031200_1	Chr04:3482187|3482498	530.948	0	0	0	0	214	MD04G1031200
MD04G1031500_1	Chr04:3516717|3516954	479.421	0	0	0	0	237	MD04G1031500
MD04G1000400_1	Chr04:37795|40315	0	0	0	845.523	328.705	804	MD04G1000400
MD04G1033500_1	Chr04:3780776|3781010	0	0	0	0	774.625	234	MD04G1033500
MD04G1033500_2	Chr04:3781838|3782041	0	0	0	0	603.684	203	MD04G1033500
n/a_494	Chr04:3781841|3782044	0	0	0	0	400.009	203	n/a
MD04G1033900_1	Chr04:3810317|3810682	0	378.958	0	0	0	204	MD04G1033900
n/a_495	Chr04:3879583|3961011	0	1.16479	0	0	0	81428	n/a
n/a_496	Chr04:3902823|3903369	0	0	0	145.564	0	546	n/a
n/a_497	Chr04:3912161|3971202	0	0	0	0.897434	0	59041	n/a
MD04G1037200_1	Chr04:4152383|4155793	0	0	0	145.172	0	1008	MD04G1037200
MD04G1037200_2	Chr04:4155914|4156064	0	379.791	0	0	0	150	MD04G1037200
MD04G1037300_1	Chr04:4159250|4168018	0	0	0	352.028	0	633	MD04G1037300
MD04G1037300_2	Chr04:4167838|4168018	1344.65	0	760.36	1649.82	1453.39	180	MD04G1037300
MD04G1037600_1	Chr04:4195144|4197084	0	462.226	667.628	0	129.923	625	MD04G1037600
MD04G1037800_1	Chr04:4210998|4212686	0	147.587	481.387	0	0	386	MD04G1037800
MD04G1037800_2	Chr04:4211208|4211868	0	0	138.038	0	0	661	MD04G1037800
MD04G1038000_1	Chr04:4228329|4228521	0	0	645.192	0	0	192	MD04G1038000
MD04G1038300_1	Chr04:4252171|4252436	0	0	0	0	273.544	224	MD04G1038300
MD04G1038500_1	Chr04:4257153|4257367	452.405	0	0	0	0	214	MD04G1038500
MD04G1038500_2	Chr04:4258692|4260132	116.224	0	0	0	0	833	MD04G1038500
MD04G1039100_1	Chr04:4278617|4279379	0	0	0	104.302	0	762	MD04G1039100
MD04G1039200_1	Chr04:4300543|4300741	466.037	0	0	0	0	198	MD04G1039200
MD04G1039200_2	Chr04:4300557|4300712	0	0	0	755.267	0	155	MD04G1039200
MD04G1039500_1	Chr04:4324583|4325769	0	0	511.888	0	0	242	MD04G1039500
n/a_473	Chr04:439393|501213	0	131.93	0	0	0	61820	n/a
MD04G1003000_1	Chr04:440128|440399	0	209.443	0	0	0	272	MD04G1003000
MD04G1003000_2	Chr04:440313|440478	0	0	1474.73	0	0	84	MD04G1003000
MD04G1040400_1	Chr04:4724360|4726045	571.011	0	0	0	0	404	MD04G1040400
MD04G1040400_2	Chr04:4730373|4730865	0	0	0	140.545	0	377	MD04G1040400
MD04G1040900_1	Chr04:4779148|4780018	0	0	0	313.012	0	187	MD04G1040900
MD04G1041000_1	Chr04:4787817|4792442	0	0	0	89.3182	0	983	MD04G1041000
MD04G1042800_1	Chr04:5040957|5042053	0	278.143	0	0	0	341	MD04G1042800
n/a_498	Chr04:5125320|5129800	0	21.1711	101.834	0	0	4480	n/a
n/a_499	Chr04:5125463|5129800	0	19.7032	528.172	0	0	4337	n/a
MD04G1043700_1	Chr04:5142952|5145201	0	0	0	0	35.5006	1726	MD04G1043700
MD04G1043700_2	Chr04:5144193|5145201	0	94.0939	0	0	0	1008	MD04G1043700
MD04G1003600_1	Chr04:514671|514888	0	0	0	488.345	0	217	MD04G1003600
MD04G1003600_2	Chr04:515489|517354	0	0	0	229.374	0	231	MD04G1003600
MD04G1003600_3	Chr04:518330|518970	0	0	0	1250.47	0	297	MD04G1003600
MD04G1044600_1	Chr04:5203777|5204912	0	0	363.687	0	0	514	MD04G1044600
MD04G1044600_2	Chr04:5205388|5205563	1318.22	812.971	1824.86	1517.84	1390.8	175	MD04G1044600
MD04G1045000_1	Chr04:5244045|5244572	0	0	0	0	113.031	527	MD04G1045000
MD04G1045400_1	Chr04:5280945|5281133	0	0	994.337	0	0	188	MD04G1045400
MD04G1045900_1	Chr04:5325292|5325469	0	0	0	330.696	0	177	MD04G1045900
MD04G1003800_1	Chr04:533458|533948	0	450.701	0	0	0	316	MD04G1003800
MD04G1003800_2	Chr04:533458|534351	0	0	0	0	190.292	483	MD04G1003800
MD04G1046500_1	Chr04:5407188|5407984	0	0	0	654.242	0	203	MD04G1046500
MD04G1046900_1	Chr04:5448570|5449014	0	0	0	0	174.685	341	MD04G1046900
MD04G1047300_1	Chr04:5518290|5518772	0	0	0	170.155	0	344	MD04G1047300
MD04G1047300_2	Chr04:5525065|5525275	0	0	0	836.188	0	210	MD04G1047300
MD04G1047300_3	Chr04:5525065|5525497	374.993	4461.78	1656.23	1767	1434.73	303	MD04G1047300
MD04G1047500_1	Chr04:5539885|5540078	0	400.557	0	0	0	193	MD04G1047500
MD04G1048800_1	Chr04:5711515|5718876	0	0	0	226.457	0	820	MD04G1048800
MD04G1004800_1	Chr04:606704|609252	0	0	111.001	0	0	822	MD04G1004800
MD04G1004800_2	Chr04:608207|609030	0	144.224	0	0	0	395	MD04G1004800
MD04G1051900_1	Chr04:6092277|6092864	0	0	261.442	0	0	349	MD04G1051900
MD04G1052000_1	Chr04:6109689|6109842	0	0	0	0	389.33	153	MD04G1052000
MD04G1004900_1	Chr04:616967|617858	0	0	0	0	224.315	362	MD04G1004900
n/a_500	Chr04:6185819|6186356	0	0	254.869	0	0	537	n/a
n/a_501	Chr04:6208050|6229794	27.8744	13.0859	30.5841	2.69192	2.81797	21744	n/a
n/a_502	Chr04:6232453|6246599	12.0482	0	0	0	0	14146	n/a
n/a_503	Chr04:6314878|6340882	0	0	0	10.1292	0	26004	n/a
n/a_504	Chr04:6315643|6341742	0	9.82255	0	29.6009	0	26099	n/a
n/a_505	Chr04:6401240|6423472	16.3757	5.12492	8.20827	21.7103	0	22232	n/a
MD04G1054200_1	Chr04:6438585|6439118	0	0	0	0	152.349	533	MD04G1054200
MD04G1005500_1	Chr04:649831|650076	0	0	0	346.31	0	153	MD04G1005500
n/a_506	Chr04:6535011|6587962	0	0	0	1.10542	0	52951	n/a
MD04G1005500_2	Chr04:654684|657365	0	0	0	116.324	0	911	MD04G1005500
MD04G1055600_1	Chr04:6691047|6691554	438.135	444.55	2553.36	1493.59	313.118	389	MD04G1055600
MD04G1055600_2	Chr04:6695187|6698583	0	0	0	218.816	0	535	MD04G1055600
MD04G1055700_1	Chr04:6740545|6740742	0	0	460.824	0	0	198	MD04G1055700
n/a_507	Chr04:6772463|6803421	0	6.50604	0	0	0	30958	n/a
MD04G1057100_1	Chr04:6992607|6992765	0	0	0	940.227	0	158	MD04G1057100
MD04G1057200_1	Chr04:7002865|7003801	0	0	0	121.248	0	437	MD04G1057200
MD04G1057200_2	Chr04:7021066|7022010	218.921	0	0	0	0	843	MD04G1057200
MD04G1057200_3	Chr04:7042430|7043079	0	0	0	194.247	0	452	MD04G1057200
MD04G1006300_1	Chr04:723812|724997	0	98.7895	0	0	0	865	MD04G1006300
MD04G1060500_1	Chr04:7909979|7910343	0	0	250.668	0	0	364	MD04G1060500
MD04G1060900_1	Chr04:8021692|8022746	293.347	133.059	549.658	419.76	158.194	581	MD04G1060900
MD04G1060900_2	Chr04:8021692|8022993	338.04	198.913	573.456	901.387	1051.11	716	MD04G1060900
MD04G1061500_1	Chr04:8135378|8135759	0	0	0	0	156.345	381	MD04G1061500
MD04G1061500_2	Chr04:8135641|8135803	896.433	0	0	0	0	162	MD04G1061500
MD04G1061900_1	Chr04:8171189|8172385	182.844	0	0	0	0	757	MD04G1061900
MD04G1062200_1	Chr04:8197087|8199513	0	0	0	0	213.628	849	MD04G1062200
MD04G1062600_1	Chr04:8228464|8229374	0	0	0	0	370.785	219	MD04G1062600
MD04G1062800_1	Chr04:8263505|8263695	0	0	1303.97	0	0	190	MD04G1062800
MD04G1062800_2	Chr04:8264470|8267516	0	47.457	0	0	0	1629	MD04G1062800
MD04G1062800_3	Chr04:8264683|8264890	0	687.294	0	0	0	207	MD04G1062800
MD04G1062800_4	Chr04:8267583|8269325	0	0	0	0	69.9212	1742	MD04G1062800
MD04G1062800_5	Chr04:8267598|8269325	0	0	0	0	70.5285	1727	MD04G1062800
MD04G1007200_1	Chr04:845109|846371	0	0	278.18	107.694	165.044	492	MD04G1007200
n/a_508	Chr04:8642928|8673357	2358.95	0	8.99568	0	0	30429	n/a
MD04G1065500_1	Chr04:8771739|8771941	0	0	0	367.712	0	202	MD04G1065500
MD04G1007800_1	Chr04:883038|884414	156.505	0	0	0	0	726	MD04G1007800
MD04G1007900_1	Chr04:893543|896062	0	0	0	56.6689	86.8469	935	MD04G1007900
MD04G1007900_2	Chr04:894582|894751	0	1122.44	0	0	0	169	MD04G1007900
MD04G1007900_3	Chr04:895772|896062	500.766	0	0	0	0	290	MD04G1007900
MD04G1066700_1	Chr04:8991695|8991885	0	486.911	0	0	0	117	MD04G1066700
MD04G1069000_1	Chr04:9415468|9417075	118.977	0	1500.69	0	0	955	MD04G1069000
MD04G1008000_1	Chr04:941556|941713	0	0	581.167	559.234	0	157	MD04G1008000
MD04G1008000_2	Chr04:941568|941782	0	0	0	867.732	0	214	MD04G1008000
MD04G1069000_2	Chr04:9416600|9416962	0	0	252.053	0	0	362	MD04G1069000
n/a_509	Chr04:9545911|9546626	0	0	0	0	85.6978	715	n/a
MD04G1069700_1	Chr04:9547102|9547548	0	0	0	459.925	0	323	MD04G1069700
MD04G1070200_1	Chr04:9590916|9595457	0	168.766	0	0	0	562	MD04G1070200
MD04G1070200_2	Chr04:9594772|9595457	0	806.634	2181.86	891.754	0	247	MD04G1070200
n/a_510	Chr04:9682264|9682948	301.021	0	1602.9	85.5748	846.354	684	n/a
n/a_474	Chr04:984025|984657	0	0	0	117.528	0	632	n/a
MD04G1072900_1	Chr04:9964670|9972572	0	0	198.787	0	0	459	MD04G1072900
MD05G1057800_1	Chr05:10040251|10040414	1394.15	0	0	0	0	163	MD05G1057800
MD05G1058800_1	Chr05:10285900|10286374	0	0	0	0	190.921	312	MD05G1058800
MD05G1059300_1	Chr05:10351688|10352717	0	0	0	147.182	0	540	MD05G1059300
n/a_561	Chr05:10992046|10992243	0	289.181	0	0	0	197	n/a
MD05G1063400_1	Chr05:11153768|11153989	417.535	0	0	239.753	0	221	MD05G1063400
MD05G1065100_1	Chr05:11590063|11590733	275.449	0	0	0	0	670	MD05G1065100
MD05G1003500_1	Chr05:1187206|1187416	0	552.196	589.89	0	0	210	MD05G1003500
MD05G1066000_1	Chr05:12336357|12336540	0	0	498.596	0	0	183	MD05G1066000
MD05G1004100_1	Chr05:1267096|1267699	0	0	0	0	187.533	433	MD05G1004100
MD05G1004100_2	Chr05:1267096|1267877	0	0	0	0	116.712	525	MD05G1004100
MD05G1067500_1	Chr05:12704697|12705636	0	0	0	0	177.434	518	MD05G1067500
MD05G1067500_2	Chr05:12704697|12706178	0	0	0	87.7989	0	846	MD05G1067500
Apple_newGene_32673_1	Chr05:1274223|1276456	0	0	40.8612	0	0	2233	Apple_newGene_32673
MD05G1068800_1	Chr05:13282396|13285559	0	66.8646	0	0	63.5382	1278	MD05G1068800
MD05G1070400_1	Chr05:13607791|13608992	0	0	0	235.057	0	316	MD05G1070400
MD05G1070700_1	Chr05:14517625|14518797	0	0	0	0	125.537	949	MD05G1070700
MD05G1071400_1	Chr05:15038776|15040023	0	0	0	0	132.198	927	MD05G1071400
MD05G1071900_1	Chr05:15150035|15150281	0	230.642	0	0	0	247	MD05G1071900
MD05G1006300_1	Chr05:1540163|1541064	0	0	361.157	0	0	343	MD05G1006300
MD05G1073000_1	Chr05:15423826|15424035	0	0	2192.51	0	0	113	MD05G1073000
MD05G1073600_1	Chr05:15473274|15473457	529.042	0	0	0	0	183	MD05G1073600
MD05G1073600_2	Chr05:15473808|15474000	591.786	0	0	0	0	192	MD05G1073600
MD05G1074600_1	Chr05:15867678|15869470	0	100.686	0	0	0	942	MD05G1074600
MD05G1074600_2	Chr05:15867678|15869644	0	102.094	0	0	0	1116	MD05G1074600
MD05G1075500_1	Chr05:16189653|16190256	0	113.258	371.641	263.347	0	503	MD05G1075500
n/a_562	Chr05:16940460|16943096	0	198.012	0	453.938	0	2636	n/a
MD05G1081400_1	Chr05:17045807|17046766	0	0	0	0	285.922	568	MD05G1081400
MD05G1081500_1	Chr05:17125133|17125897	0	0	0	0	126.09	644	MD05G1081500
MD05G1082000_1	Chr05:17177527|17177704	1093.95	0	0	0	0	177	MD05G1082000
MD05G1082000_2	Chr05:17177828|17178035	0	0	903.069	0	0	207	MD05G1082000
MD05G1082200_1	Chr05:17183067|17183762	0	0	269.154	0	0	339	MD05G1082200
MD05G1082300_1	Chr05:17204602|17205766	288.962	0	585.393	0	0	479	MD05G1082300
n/a_563	Chr05:17208904|17245021	0	3.94334	0	2.20057	0	36117	n/a
MD05G1082600_1	Chr05:17268073|17268241	0	339.099	0	0	0	168	MD05G1082600
MD05G1083900_1	Chr05:17486772|17487723	0	275.477	0	0	0	517	MD05G1083900
MD05G1085000_1	Chr05:17743813|17745353	68.7084	86.3449	0	0	0	1343	MD05G1085000
MD05G1087100_1	Chr05:18552223|18553167	0	0	0	89.0916	0	657	MD05G1087100
MD05G1087100_2	Chr05:18552223|18553980	392.887	0	0	0	0	723	MD05G1087100
MD05G1087100_3	Chr05:18552223|18556454	0	0	0	0	46.8814	1307	MD05G1087100
MD05G1008600_1	Chr05:1858614|1858791	0	436.765	0	419.649	0	177	MD05G1008600
MD05G1008600_2	Chr05:1858614|1858819	0	277.896	0	0	0	205	MD05G1008600
MD05G1008600_3	Chr05:1858614|1858821	467.704	1307.13	0	0	0	207	MD05G1008600
MD05G1008600_4	Chr05:1858634|1858800	0	0	0	352.61	0	166	MD05G1008600
MD05G1008600_5	Chr05:1858659|1858851	1201.5	0	973.622	0	0	192	MD05G1008600
MD05G1008600_6	Chr05:1858738|1858899	601.334	0	0	0	0	161	MD05G1008600
MD05G1089900_1	Chr05:19019171|19019344	0	0	0	306.274	0	173	MD05G1089900
MD05G1092000_1	Chr05:19505478|19505628	0	0	1246.24	0	0	150	MD05G1092000
MD05G1093300_1	Chr05:19797819|19798005	0	415.631	0	0	0	186	MD05G1093300
MD05G1094500_1	Chr05:20040078|20040229	0	511.97	0	0	0	151	MD05G1094500
MD05G1094500_2	Chr05:20040414|20040595	0	427.113	0	0	0	181	MD05G1094500
MD05G1009600_1	Chr05:2012446|2016364	0	0	0	60.635	0	1225	MD05G1009600
n/a_564	Chr05:20407628|20407779	916.643	0	0	0	0	151	n/a
MD05G1098600_1	Chr05:20539035|20539724	452.33	0	0	0	0	306	MD05G1098600
MD05G1101500_1	Chr05:20964534|20964688	628.667	0	0	0	0	154	MD05G1101500
MD05G1010400_1	Chr05:2129175|2129335	0	0	0	0	372.297	160	MD05G1010400
n/a_565	Chr05:21334366|21370397	0	0	17.7265	0	0	36031	n/a
n/a_566	Chr05:21336905|21380732	0	0	22.612	52.1948	0	43827	n/a
n/a_567	Chr05:21821886|21853409	0	4.90483	0	0	0	31523	n/a
n/a_568	Chr05:21875473|21875632	0	0	779.1	0	0	159	n/a
MD05G1105600_1	Chr05:21881222|21881650	0	0	0	0	268.745	228	MD05G1105600
MD05G1107800_1	Chr05:22109553|22109757	0	279.258	0	0	0	204	MD05G1107800
MD05G1107800_2	Chr05:22109666|22127389	0	47.2815	0	0	0	2006	MD05G1107800
MD05G1107800_3	Chr05:22123264|22128805	0	0	82.3123	0	0	2217	MD05G1107800
MD05G1107800_4	Chr05:22126134|22126854	0	0	228.68	0	0	399	MD05G1107800
MD05G1107800_5	Chr05:22140146|22140561	0	0	300.142	0	0	304	MD05G1107800
n/a_569	Chr05:22688804|22689051	0	383.994	0	0	0	247	n/a
MD05G1110700_1	Chr05:22759621|22760077	0	0	0	204.661	428.489	286	MD05G1110700
n/a_570	Chr05:22911295|22972237	0	0	41.922	0	0	60942	n/a
MD05G1113900_1	Chr05:23265490|23266785	0	0	0	540.243	0	609	MD05G1113900
MD05G1116400_1	Chr05:23732833|23732986	1113.95	0	1221.8	0	0	153	MD05G1116400
n/a_571	Chr05:23784153|23784352	570.969	429.412	0	0	0	199	n/a
n/a_572	Chr05:23784192|23784352	1441.8	592.791	0	0	1780.95	160	n/a
MD05G1117800_1	Chr05:23877015|23877189	0	0	711.937	0	0	174	MD05G1117800
MD05G1117800_2	Chr05:23877015|23877201	520.509	0	0	0	0	186	MD05G1117800
MD05G1120100_1	Chr05:24165513|24165808	328.186	0	0	0	0	295	MD05G1120100
MD05G1120900_1	Chr05:24363197|24363352	0	0	799.206	0	0	155	MD05G1120900
MD05G1121200_1	Chr05:24390135|24391445	0	0	0	0	214.996	570	MD05G1121200
MD05G1121300_1	Chr05:24406667|24406841	979.508	0	0	0	0	174	MD05G1121300
MD05G1121500_1	Chr05:24412462|24414147	0	0	0	0	110.926	537	MD05G1121500
MD05G1121800_1	Chr05:24419815|24420219	0	0	0	348.478	0	404	MD05G1121800
MD05G1122000_1	Chr05:24441221|24441425	0	0	670.906	0	0	204	MD05G1122000
MD05G1122100_1	Chr05:24472524|24473624	0	0	0	103.285	0	513	MD05G1122100
Apple_newGene_34947_1	Chr05:24511087|24511317	0	504.179	0	0	0	230	Apple_newGene_34947
MD05G1122700_1	Chr05:24546805|24547455	900.602	0	0	0	0	215	MD05G1122700
MD05G1122800_1	Chr05:24550710|24552950	0	0	0	0	361.015	495	MD05G1122800
MD05G1123200_1	Chr05:24577851|24578860	0	0	389.55	0	0	636	MD05G1123200
n/a_573	Chr05:24599379|24609274	285.389	598.579	108.066	670.8	223.248	9895	n/a
MD05G1123800_1	Chr05:24612942|24613568	0	0	0	0	410.317	448	MD05G1123800
MD05G1123800_2	Chr05:24620507|24620663	591.509	0	0	0	0	156	MD05G1123800
MD05G1124200_1	Chr05:24645485|24645635	968.147	0	0	0	0	150	MD05G1124200
MD05G1124900_1	Chr05:24723188|24723364	0	0	1593.2	0	0	176	MD05G1124900
n/a_574	Chr05:24824927|24877520	0	2.1664	0	0	0	52593	n/a
n/a_575	Chr05:24825574|24885274	0	0	0	1.47068	0	59700	n/a
MD05G1012600_1	Chr05:2493436|2493637	722.498	0	0	0	0	201	MD05G1012600
MD05G1126500_1	Chr05:24967608|24968094	0	0	0	0	205.055	396	MD05G1126500
MD05G1127100_1	Chr05:25047070|25047268	0	0	0	0	618.929	198	MD05G1127100
MD05G1128200_1	Chr05:25213138|25213801	0	0	0	201.842	0	368	MD05G1128200
MD05G1128400_1	Chr05:25235409|25235563	628.667	0	0	0	0	154	MD05G1128400
MD05G1128400_2	Chr05:25236193|25236544	0	0	0	166.761	0	351	MD05G1128400
MD05G1128600_1	Chr05:25244960|25245146	0	0	1665.01	0	0	186	MD05G1128600
MD05G1128900_1	Chr05:25268470|25268782	0	365.183	0	0	0	312	MD05G1128900
n/a_576	Chr05:25847925|25848442	0	110.191	0	0	0	517	n/a
Apple_newGene_32886_1	Chr05:2597640|2599039	0	0	0	0	151.465	1399	Apple_newGene_32886
Apple_newGene_32886_2	Chr05:2597640|2599044	80.928	0	0	0	0	1404	Apple_newGene_32886
MD05G1135400_1	Chr05:26353597|26353853	0	370.495	0	0	0	256	MD05G1135400
n/a_577	Chr05:26372173|26379024	0	0	0	0	63.2207	6851	n/a
n/a_578	Chr05:26393193|26394153	96.1202	0	0	0	0	960	n/a
n/a_579	Chr05:26522822|26524891	0	0	59.8729	51.2184	0	2069	n/a
MD05G1139300_1	Chr05:26979592|26980648	293.023	93.5926	0	170.442	490.242	826	MD05G1139300
n/a_580	Chr05:27103210|27133332	4.59508	3.84972	10.7124	1.9432	1.97754	30122	n/a
n/a_581	Chr05:27105126|27134674	8.19131	18.6237	25.0422	7.54141	0	29548	n/a
n/a_582	Chr05:27106402|27155010	0	0	0	0	17.0177	48608	n/a
n/a_583	Chr05:27106597|27155192	230.324	106.457	277.471	99.3824	149.58	48595	n/a
MD05G1014700_1	Chr05:2729990|2730142	0	2797.31	4201.99	0	0	152	MD05G1014700
n/a_584	Chr05:27303257|27394950	0	0	0	0	125.705	91693	n/a
MD05G1142600_1	Chr05:27359497|27360412	0	84.3968	0	0	0	916	MD05G1142600
MD05G1143500_1	Chr05:27470528|27470729	0	0	0	0	403.989	201	MD05G1143500
n/a_585	Chr05:27643882|27662168	0	0	0	0	4.88632	18286	n/a
MD05G1145700_1	Chr05:27673677|27678603	0	0	179.919	0	78.1539	1039	MD05G1145700
MD05G1145700_2	Chr05:27675120|27678963	136.895	0	0	0	0	830	MD05G1145700
MD05G1145700_3	Chr05:27675932|27678603	0	0	0	0	136.414	655	MD05G1145700
Apple_newGene_35266_1	Chr05:27954790|28039667	31.337	0	24.7531	102.793	43.2726	11328	Apple_newGene_35266
n/a_586	Chr05:28126230|28160903	2.79222	0	0	0	0	34673	n/a
MD05G1151200_1	Chr05:28204100|28204296	0	290.656	0	0	0	196	MD05G1151200
MD05G1153300_1	Chr05:28410358|28411654	0	0	112.207	0	0	1104	MD05G1153300
n/a_587	Chr05:28446011|28446194	0	0	0	405.89	0	183	n/a
n/a_588	Chr05:28453544|28466519	13.1356	0	0	0	0	12975	n/a
n/a_589	Chr05:28548294|28607076	0	7.89093	0	0	0	58782	n/a
MD05G1156300_1	Chr05:28625794|28626213	0	0	0	252.914	0	419	MD05G1156300
n/a_590	Chr05:28686016|28695511	0	32.5676	19.2192	7.82284	6.45329	9495	n/a
n/a_591	Chr05:28688707|28706739	113.835	98.092	77.1338	72.4256	63.9188	18032	n/a
n/a_592	Chr05:28697015|28725600	0	13.6115	11.172	3.70722	2.84072	28585	n/a
n/a_593	Chr05:28697339|28725816	0	6.00154	4.35007	0	0	28477	n/a
MD05G1159000_1	Chr05:28779588|28781437	0	0	0	104.611	0	1013	MD05G1159000
MD05G1016500_1	Chr05:2902903|2903709	0	0	0	0	154.32	386	MD05G1016500
n/a_594	Chr05:29096327|29108025	0	7.30492	0	24.7342	0	11698	n/a
MD05G1163300_1	Chr05:29213249|29213512	0	0	706.523	0	0	263	MD05G1163300
MD05G1163400_1	Chr05:29236119|29236486	0	0	0	228.645	0	256	MD05G1163400
MD05G1164800_1	Chr05:29342474|29342641	579.729	0	0	0	0	167	MD05G1164800
MD05G1165800_1	Chr05:29494507|29495627	0	0	0	91.6012	0	639	MD05G1165800
MD05G1166200_1	Chr05:29567273|29567438	0	0	0	532.12	0	165	MD05G1166200
n/a_595	Chr05:29750462|29836384	0	0	124.011	0	0	85922	n/a
MD05G1168700_1	Chr05:29863694|29863850	0	365.183	0	1072.29	0	156	MD05G1168700
n/a_596	Chr05:29865765|29868520	350.561	0	0	2230.97	956.363	2755	n/a
MD05G1170700_1	Chr05:30028343|30028956	185.355	0	0	345.745	0	613	MD05G1170700
MD05G1170800_1	Chr05:30033685|30033982	0	0	0	0	291.781	210	MD05G1170800
MD05G1174400_1	Chr05:30255692|30256040	0	0	0	213.442	0	348	MD05G1174400
MD05G1177400_1	Chr05:30450518|30450671	0	0	0	0	973.325	153	MD05G1177400
MD05G1177500_1	Chr05:30451213|30451412	0	0	0	0	461.864	199	MD05G1177500
MD05G1178700_1	Chr05:30525616|30526156	0	0	229.402	0	0	540	MD05G1178700
n/a_597	Chr05:30667686|30683122	0	0	14.7777	0	0	15436	n/a
MD05G1179300_1	Chr05:30699492|30699661	1008.49	337.092	0	0	0	169	MD05G1179300
MD05G1179700_1	Chr05:30747986|30748163	0	0	0	330.696	0	177	MD05G1179700
MD05G1179800_1	Chr05:30774946|30783904	0	0	18114.4	0	15439.4	272	MD05G1179800
n/a_598	Chr05:30785308|30825342	0	14.2301	0	0	0	40034	n/a
n/a_599	Chr05:30786228|30826247	4.61158	49.0477	9.34233	12.2688	0	40019	n/a
n/a_600	Chr05:30789676|30792254	0	0	0	0	62.996	2578	n/a
MD05G1017800_1	Chr05:3108409|3108565	616.654	0	0	0	0	157	MD05G1017800
MD05G1184900_1	Chr05:31337790|31339086	0	123.487	0	0	132.819	692	MD05G1184900
MD05G1184900_2	Chr05:31342550|31343450	389.119	0	0	0	0	438	MD05G1184900
MD05G1185500_1	Chr05:31416056|31416211	1099.58	0	0	0	0	155	MD05G1185500
MD05G1185500_2	Chr05:31416119|31416274	0	0	0	476.14	0	156	MD05G1185500
MD05G1186600_1	Chr05:31471345|31471672	0	0	378.829	0	0	327	MD05G1186600
n/a_601	Chr05:31521855|31545369	0	0	0	230.969	0	23514	n/a
MD05G1187100_1	Chr05:31522500|31522806	0	0	0	0	375.935	216	MD05G1187100
n/a_602	Chr05:31523017|31551249	5.14388	0	0	34.2028	0	28232	n/a
n/a_603	Chr05:31524102|31552326	0	0	0	344.264	0	28224	n/a
n/a_604	Chr05:31525682|31554512	0	0	0	109.352	0	28830	n/a
MD05G1189200_1	Chr05:31709311|31709534	0	0	0	0	267.119	223	MD05G1189200
MD05G1189200_2	Chr05:31710486|31711343	0	0	0	211.311	0	277	MD05G1189200
n/a_605	Chr05:31944223|31966213	0	10.7898	5.63333	3.61429	17.0215	21990	n/a
MD05G1191900_1	Chr05:32019058|32019221	0	0	0	455.693	0	163	MD05G1191900
MD05G1192400_1	Chr05:32054562|32055039	245.101	0	0	0	0	395	MD05G1192400
MD05G1192400_2	Chr05:32056583|32057855	0	575.834	0	1809.18	0	346	MD05G1192400
MD05G1192500_1	Chr05:32059545|32060339	0	0	0	136.441	0	429	MD05G1192500
MD05G1193800_1	Chr05:32167844|32168016	1877.7	0	0	0	356.244	172	MD05G1193800
MD05G1196400_1	Chr05:32377047|32377251	0	0	0	519.465	0	204	MD05G1196400
MD05G1196500_1	Chr05:32381960|32383773	0	0	0	520.24	0	710	MD05G1196500
MD05G1197300_1	Chr05:32449660|32450672	0	0	0	0	71.0835	862	MD05G1197300
n/a_606	Chr05:32485471|32510183	0	0	0	0	6.09522	24712	n/a
MD05G1199600_1	Chr05:32725007|32725566	0	0	0	104.711	0	559	MD05G1199600
MD05G1199700_1	Chr05:32734815|32735068	449.102	0	0	0	0	253	MD05G1199700
MD05G1204100_1	Chr05:33381148|33381418	358.573	0	0	0	300.748	270	MD05G1204100
MD05G1204400_1	Chr05:33404983|33405216	487.652	0	0	0	0	233	MD05G1204400
MD05G1204900_1	Chr05:33447369|33447727	0	0	0	163.501	0	358	MD05G1204900
MD05G1206700_1	Chr05:33588519|33588797	0	0	0	0	214.271	278	MD05G1206700
MD05G1208300_1	Chr05:33967612|33967824	0	447.39	0	0	0	212	MD05G1208300
MD05G1209200_1	Chr05:34089649|34090108	0	390.851	0	0	0	364	MD05G1209200
MD05G1209200_2	Chr05:34090632|34090792	0	0	0	914.581	0	160	MD05G1209200
MD05G1210000_1	Chr05:34147090|34147437	0	0	0	229.044	0	347	MD05G1210000
n/a_607	Chr05:34439559|34472366	0	11.9215	0	17.7975	0	32807	n/a
MD05G1213200_1	Chr05:34443371|34448027	0	0	0	76.1825	0	975	MD05G1213200
MD05G1213700_1	Chr05:34510626|34511888	0	146.368	0	0	0	648	MD05G1213700
MD05G1214800_1	Chr05:34582185|34582356	0	333.15	0	0	0	171	MD05G1214800
MD05G1214900_1	Chr05:34588373|34589648	0	0	0	78.1484	0	749	MD05G1214900
n/a_608	Chr05:34731941|34812265	1.14879	0	2.31332	0	5.25756	80324	n/a
MD05G1221000_1	Chr05:35355656|35355953	0	319.349	0	0	0	297	MD05G1221000
MD05G1221200_1	Chr05:35405025|35408197	1046.31	1442.94	803.375	1032.7	1845.42	982	MD05G1221200
MD05G1021100_1	Chr05:3557798|3557954	2333.74	0	0	0	0	156	MD05G1021100
MD05G1021100_2	Chr05:3558010|3558350	271.398	0	0	0	0	340	MD05G1021100
MD05G1021100_3	Chr05:3558023|3558185	701.376	0	0	0	0	162	MD05G1021100
MD05G1021100_4	Chr05:3558134|3558302	676.327	0	0	0	0	168	MD05G1021100
MD05G1223500_1	Chr05:35628811|35629983	0	0	0	86.8613	0	610	MD05G1223500
MD05G1223500_2	Chr05:35628953|35629188	0	0	1730.88	0	0	108	MD05G1223500
MD05G1021200_1	Chr05:3583374|3588106	0	0	0	73.6932	0	719	MD05G1021200
MD05G1021200_2	Chr05:3587710|3588106	0	0	0	372.033	0	236	MD05G1021200
n/a_609	Chr05:36214536|36268376	3.59639	0	0	0	0	53840	n/a
n/a_610	Chr05:36221550|36275677	1.78866	0	0	0	0	54127	n/a
n/a_611	Chr05:36223206|36277248	18.8105	0	0	0	0	54042	n/a
MD05G1230300_1	Chr05:36369893|36370532	0	163.703	0	0	0	348	MD05G1230300
MD05G1230600_1	Chr05:36413724|36413979	379.666	0	0	0	0	255	MD05G1230600
n/a_612	Chr05:36414904|36415164	874.022	0	0	0	0	260	n/a
n/a_613	Chr05:36460138|36473167	0	0	0	6.10009	0	13029	n/a
n/a_614	Chr05:36516345|36572931	10.5983	0	25.5565	0	20.573	56586	n/a
n/a_615	Chr05:36519798|36577616	0	0	0	5.78108	0	57818	n/a
n/a_616	Chr05:36632600|36635872	0	0	69.7151	0	0	3272	n/a
n/a_617	Chr05:36632817|36636089	0	0	171.396	0	0	3272	n/a
n/a_618	Chr05:36632936|36636208	0	255.283	189.299	80.501	0	3272	n/a
MD05G1234200_1	Chr05:36653177|36653371	0	0	1175.81	0	0	194	MD05G1234200
MD05G1235200_1	Chr05:36722754|36723970	0	0	0	111.528	0	666	MD05G1235200
MD05G1235200_2	Chr05:36723667|36723970	0	0	0	246.444	0	215	MD05G1235200
n/a_619	Chr05:36775254|36775461	0	0	440.788	0	0	207	n/a
n/a_620	Chr05:36800517|36848995	0	0	0	0	1.84313	48478	n/a
n/a_621	Chr05:36802434|36850954	1.99536	0	0	0	0	48520	n/a
n/a_622	Chr05:36991794|36991966	0	0	0	0	356.244	172	n/a
MD05G1239900_1	Chr05:37082033|37082613	0	0	0	706.164	0	373	MD05G1239900
MD05G1239900_2	Chr05:37082033|37082810	280.757	0	185.077	0	120.827	493	MD05G1239900
MD05G1239900_3	Chr05:37086722|37088084	265.61	237.215	0	312.804	335.186	729	MD05G1239900
MD05G1240000_1	Chr05:37090626|37090815	0	0	0	393.005	0	189	MD05G1240000
MD05G1240000_2	Chr05:37090800|37090988	0	303.025	0	0	0	188	MD05G1240000
MD05G1240000_3	Chr05:37090800|37090991	0	0	0	777.779	0	191	MD05G1240000
MD05G1240000_4	Chr05:37090800|37090994	0	488.9	0	1257.12	0	194	MD05G1240000
MD05G1240000_5	Chr05:37090800|37090997	0	877.816	0	0	0	197	MD05G1240000
MD05G1240600_1	Chr05:37127204|37127360	728.352	0	0	0	0	156	MD05G1240600
MD05G1241100_1	Chr05:37168625|37170802	0	74.3716	0	0	0	766	MD05G1241100
MD05G1242300_1	Chr05:37512855|37513047	504.243	0	0	0	0	192	MD05G1242300
n/a_623	Chr05:37513865|37514237	0	0	0	0	327.427	372	n/a
MD05G1242400_1	Chr05:37518570|37519116	0	0	0	0	231.78	257	MD05G1242400
n/a_624	Chr05:37698188|37714628	5.88897	0	0	0	0	16440	n/a
n/a_625	Chr05:37707485|37707751	0	0	0	199.193	0	266	n/a
MD05G1245300_1	Chr05:37734387|37736010	235.537	0	232.507	0	67.3316	1206	MD05G1245300
n/a_626	Chr05:37749614|37759038	0	0	0	7.88178	0	9424	n/a
n/a_627	Chr05:37967770|37980923	0	0	24.618	0	0	13153	n/a
MD05G1249100_1	Chr05:38072990|38073249	0	0	721.758	0	0	259	MD05G1249100
MD05G1249500_1	Chr05:38115033|38115735	0	177.718	0	0	0	435	MD05G1249500
MD05G1249700_1	Chr05:38123292|38123561	0	211.779	0	0	0	269	MD05G1249700
MD05G1250200_1	Chr05:38258254|38258620	0	0	249.298	0	0	366	MD05G1250200
MD05G1250500_1	Chr05:38271417|38274567	0	105.785	0	0	0	1827	MD05G1250500
MD05G1251500_1	Chr05:38322291|38323923	0	0	0	0	49.3349	1242	MD05G1251500
n/a_628	Chr05:38438021|38454285	51.7295	0	48.2332	0	29.6284	16264	n/a
n/a_629	Chr05:38442946|38448002	0	0	49.002	0	0	5056	n/a
MD05G1254800_1	Chr05:38542916|38543818	0	0	0	0	161.868	368	MD05G1254800
MD05G1023200_1	Chr05:3885413|3885613	568.114	0	0	0	0	200	MD05G1023200
MD05G1023200_2	Chr05:3890742|3890901	608.898	0	0	0	0	159	MD05G1023200
n/a_555	Chr05:3900331|3902215	77.0818	0	0	0	0	1884	n/a
n/a_556	Chr05:3903075|3906447	0	22.9263	0	0	0	3372	n/a
MD05G1023700_1	Chr05:3916315|3916468	632.776	0	0	0	0	153	MD05G1023700
MD05G1257400_1	Chr05:39373868|39374131	0	0	0	0	232.981	263	MD05G1257400
n/a_630	Chr05:39580153|39637517	0	0	0	1.29485	0	57364	n/a
MD05G1024400_1	Chr05:3969126|3969302	524.292	0	0	0	0	176	MD05G1024400
MD05G1024500_1	Chr05:3991608|3991791	504.237	0	0	0	0	183	MD05G1024500
n/a_631	Chr05:39931944|39936611	0	974.874	0	814.218	0	4667	n/a
MD05G1263900_1	Chr05:39932006|39932213	467.704	0	0	0	0	207	MD05G1263900
MD05G1264200_1	Chr05:39944002|39944167	0	0	0	450.169	0	165	MD05G1264200
n/a_632	Chr05:39947590|39967655	0	0	0	7.29295	0	20065	n/a
n/a_633	Chr05:40060468|40087828	0	68.7449	0	9.50192	0	27360	n/a
n/a_634	Chr05:40369925|40391495	0	0	0	4.07046	0	21570	n/a
MD05G1268400_1	Chr05:40391014|40391165	0	377.276	0	0	0	151	MD05G1268400
MD05G1269300_1	Chr05:40451445|40451640	0	0	0	271.72	0	195	MD05G1269300
MD05G1271600_1	Chr05:40696476|40696942	207.757	0	0	0	0	466	MD05G1271600
MD05G1271700_1	Chr05:40706561|40708062	0	0	0	126.971	0	585	MD05G1271700
MD05G1271700_2	Chr05:40706822|40708062	0	0	0	119.877	0	442	MD05G1271700
MD05G1271700_3	Chr05:40708662|40708843	0	0	0	0	677.06	181	MD05G1271700
n/a_635	Chr05:40945894|40949206	27.8609	0	0	0	0	3312	n/a
n/a_636	Chr05:40945894|40949253	0	0	55.3187	0	0	3359	n/a
MD05G1275500_1	Chr05:40980989|40988358	0	0	0	0	121.335	505	MD05G1275500
MD05G1275500_2	Chr05:40980989|40990298	0	0	0	0	58.3347	1392	MD05G1275500
MD05G1025100_1	Chr05:4103761|4104125	0	0	0	422.407	0	364	MD05G1025100
MD05G1025100_2	Chr05:4103761|4104135	388.294	108195	1249.57	188720	2547.95	374	MD05G1025100
MD05G1025100_3	Chr05:4103761|4104141	0	373.412	0	0	0	381	MD05G1025100
MD05G1025100_4	Chr05:4103761|4105345	0	97.5488	0	130.436	0	1585	MD05G1025100
MD05G1025100_5	Chr05:4103761|4105455	0	2235.05	0	4485.79	0	1695	MD05G1025100
MD05G1276000_1	Chr05:41049073|41051428	101.068	0	0	0	0	913	MD05G1276000
MD05G1025100_6	Chr05:4105081|4105455	0	1240.23	0	0	0	374	MD05G1025100
MD05G1278600_1	Chr05:41302280|41302481	459.081	0	0	0	0	201	MD05G1278600
MD05G1279300_1	Chr05:41357108|41357546	0	0	416.635	0	0	438	MD05G1279300
MD05G1281400_1	Chr05:41551260|41551431	0	1109.32	0	0	0	171	MD05G1281400
MD05G1282900_1	Chr05:41647512|41648094	0	0	0	0	105.282	582	MD05G1282900
MD05G1282900_2	Chr05:41650911|41653126	0	0	0	26.4258	0	2215	MD05G1282900
MD05G1286900_1	Chr05:41951318|41951548	4090.76	0	0	0	0	71	MD05G1286900
MD05G1026300_1	Chr05:4216086|4216268	0	0	1027.12	0	0	182	MD05G1026300
n/a_557	Chr05:4218075|4219682	208.035	0	0	36.4239	252.052	1607	n/a
MD05G1026300_2	Chr05:4218775|4218955	0	0	0	825.31	0	180	MD05G1026300
[truncated: 4,497 more rows]
