# Supplementary material for: Expression Characteristics in Roots, Phloem, Leaves, Flowers and Fruits of Apple circRNA
Source: Genes (Basel). 2022 Apr 18;13(4):712. doi: 10.3390/genes13040712 (PMC9030095; doi:10.3390/genes13040712)
Supplement: Supplementary file 1 [file genes-13-00712-s001.zip › Table S6.xlsx]

## Sheet: sheet1
Table S6 Alternative back-splicing list
No.	gene_id	circRNA_ID	geneLength
1	MD00G1001400	Chr00:290812|291414	603
		Chr00:290980|291252	273
2	MD00G1016700	Chr00:2412083|2412712	236
	MD00G1016700	Chr00:2412709|2413737	1030
3	MD00G1020700	Chr00:3733246|3733458	213
	MD00G1020700	Chr00:3733297|3733509	213
4	MD00G1034800	Chr00:6077903|6080422	443
	MD00G1034800	Chr00:6077903|6080456	477
	MD00G1034800	Chr00:6078468|6078810	343
	MD00G1034800	Chr00:6078705|6080456	406
5	MD00G1039200	Chr00:6748730|6749665	936
	MD00G1039200	Chr00:6749006|6749161	156
6	MD00G1040500	Chr00:6917896|6918099	204
	MD00G1040500	Chr00:6917998|6918231	234
7	MD00G1050700	Chr00:9597094|9598994	545
	MD00G1050700	Chr00:9597254|9598994	471
8	MD00G1063900	Chr00:11973186|11973770	447
	MD00G1063900	Chr00:11973703|11974168	165
9	MD00G1089600	Chr00:18497751|18497914	164
	MD00G1089600	Chr00:18497830|18498206	234
10	MD00G1091800	Chr00:19234230|19235805	337
	MD00G1091800	Chr00:19234230|19236745	1278
	MD00G1091800	Chr00:19234230|19245366	630
	MD00G1091800	Chr00:19235212|19245366	584
	MD00G1091800	Chr00:19242722|19245366	293
11	MD00G1105000	Chr00:21988168|21988415	248
	MD00G1105000	Chr00:21988188|21988372	185
12	MD00G1148100	Chr00:32474643|32475592	617
	MD00G1148100	Chr00:32475221|32478651	747
	MD00G1148100	Chr00:32476085|32478651	491
	MD00G1148100	Chr00:32478729|32479225	273
	MD00G1148100	Chr00:32478729|32479851	441
	MD00G1148100	Chr00:32478729|32482541	562
	MD00G1148100	Chr00:32478729|32483403	720
	MD00G1148100	Chr00:32478729|32484503	1144
	MD00G1148100	Chr00:32482421|32484962	859
13	MD00G1149200	Chr00:32823316|32823673	358
	MD00G1149200	Chr00:32823316|32824886	862
14	MD00G1191800	Chr00:46496425|46497534	411
	MD00G1191800	Chr00:46496448|46497534	388
15	MD01G1001600	Chr01:757268|757419	152
	MD01G1001600	Chr01:757354|758169	701
16	MD01G1022700	Chr01:9005792|9007553	986
	MD01G1022700	Chr01:9005815|9007553	963
17	MD01G1036200	Chr01:12168122|12168275	154
	MD01G1036200	Chr01:12168122|12168298	177
18	MD01G1036500	Chr01:12254576|12256478	427
	MD01G1036500	Chr01:12254576|12257385	732
19	MD01G1051100	Chr01:15473844|15475490	889
	MD01G1051100	Chr01:15474651|15474807	158
	MD01G1051100	Chr01:15474651|15474997	257
20	MD01G1066500	Chr01:17026174|17027454	926
	MD01G1066500	Chr01:17026883|17027454	474
21	MD01G1073600	Chr01:17915860|17916024	165
	MD01G1073600	Chr01:17915980|17916159	180
	MD01G1073600	Chr01:17915980|17916167	188
	MD01G1073600	Chr01:17917190|17917348	159
	MD01G1073600	Chr01:17917213|17917371	159
22	MD01G1110100	Chr01:22284077|22284354	278
	MD01G1110100	Chr01:22284114|22284306	193
23	MD01G1116700	Chr01:23037610|23039049	591
	MD01G1116700	Chr01:23037610|23039769	873
24	MD01G1135400	Chr01:24459640|24460343	411
	MD01G1135400	Chr01:24459640|24460348	417
25	MD01G1165200	Chr01:26930913|26931077	165
	MD01G1165200	Chr01:26930936|26931100	165
26	MD01G1165900	Chr01:26990118|26990971	579
	MD01G1165900	Chr01:26990389|26991110	535
27	MD01G1195200	Chr01:29360143|29360321	179
	MD01G1195200	Chr01:29360153|29360303	151
28	MD01G1207000	Chr01:30242234|30242383	150
	MD01G1207000	Chr01:30242234|30242409	176
29	MD01G1229500	Chr01:31880452|31883118	2418
	MD01G1229500	Chr01:31880685|31883118	2301
30	MD02G1012500	Chr02:783592|784074	265
	MD02G1012500	Chr02:783592|791943	1656
31	MD02G1042800	Chr02:3519492|3521799	1081
	MD02G1042800	Chr02:3521270|3522223	459
32	MD02G1048800	Chr02:3843190|3843625	347
	MD02G1048800	Chr02:3843437|3843856	292
	MD02G1048800	Chr02:3843471|3843625	155
33	MD02G1064300	Chr02:5193242|5194107	318
	MD02G1064300	Chr02:5193242|5194484	508
34	MD02G1096100	Chr02:7600717|7600869	153
	MD02G1096100	Chr02:7600724|7600908	185
35	MD02G1119100	Chr02:9656931|9659544	1213
	MD02G1119100	Chr02:9657123|9657899	425
	MD02G1119100	Chr02:9657123|9658733	641
	MD02G1119100	Chr02:9657123|9659280	962
	MD02G1119100	Chr02:9657123|9659544	1141
	MD02G1119100	Chr02:9658870|9659544	500
36	MD02G1127400	Chr02:10315702|10317283	571
	MD02G1127400	Chr02:10317212|10319022	392
37	MD02G1139900	Chr02:11658399|11658760	362
	MD02G1139900	Chr02:11658468|11658663	196
	MD02G1139900	Chr02:11658468|11658666	199
	MD02G1139900	Chr02:11658574|11659721	392
38	MD02G1140100	Chr02:11686003|11686166	164
	MD02G1140100	Chr02:11686003|11686244	242
	MD02G1140100	Chr02:11686113|11686331	219
	MD02G1140100	Chr02:11686222|11686382	161
	MD02G1140100	Chr02:11686259|11686540	282
	MD02G1140100	Chr02:11686351|11686629	279
	MD02G1140100	Chr02:11686400|11686678	279
	MD02G1140100	Chr02:11686492|11686670	179
	MD02G1140100	Chr02:11686642|11686811	170
39	MD02G1146200	Chr02:12081540|12081719	180
	MD02G1146200	Chr02:12081660|12081839	180
40	MD02G1149400	Chr02:12306115|12309924	1602
	MD02G1149400	Chr02:12309826|12310215	312
41	MD02G1157800	Chr02:13190574|13190800	227
	MD02G1157800	Chr02:13190633|13190830	198
	MD02G1157800	Chr02:13190801|13191597	273
42	MD02G1159300	Chr02:13362689|13367489	1604
	MD02G1159300	Chr02:13364246|13366209	837
	MD02G1159300	Chr02:13365032|13366209	605
43	MD02G1166800	Chr02:14311394|14312436	613
	MD02G1166800	Chr02:14311994|14312236	243
44	MD02G1168400	Chr02:14452712|14453406	338
	MD02G1168400	Chr02:14452712|14453425	358
	MD02G1168400	Chr02:14452715|14453406	335
	MD02G1168400	Chr02:14452998|14453425	240
45	MD02G1199700	Chr02:19651158|19651962	386
	MD02G1199700	Chr02:19651470|19651962	318
46	MD02G1244400	Chr02:29432316|29432578	263
	MD02G1244400	Chr02:29432463|29434615	548
	MD02G1244400	Chr02:29432463|29438842	1360
47	MD02G1319100	Chr02:37355899|37356430	324
	MD02G1319100	Chr02:37355899|37357325	411
	MD02G1319100	Chr02:37355899|37358850	1766
48	MD03G1003500	Chr03:252884|253081	198
	MD03G1003500	Chr03:252892|253066	175
49	MD03G1025100	Chr03:2076320|2077366	853
	MD03G1025100	Chr03:2076493|2077366	764
50	MD03G1034300	Chr03:2746963|2748082	187
	MD03G1034300	Chr03:2746963|2749693	309
	MD03G1034300	Chr03:2746963|2755122	5739
	MD03G1034300	Chr03:2746980|2755047	5647
	MD03G1034300	Chr03:2747260|2747414	155
51	MD03G1036600	Chr03:2908132|2908356	225
	MD03G1036600	Chr03:2908132|2908386	255
	MD03G1036600	Chr03:2908141|2908422	282
	MD03G1036600	Chr03:2908283|2908452	170
52	MD03G1052900	Chr03:4234878|4236021	721
	MD03G1052900	Chr03:4235398|4235562	165
53	MD03G1057400	Chr03:4580049|4580405	158
	MD03G1057400	Chr03:4580374|4581317	770
54	MD03G1071900	Chr03:5852818|5854289	804
	MD03G1071900	Chr03:5852927|5853106	108
55	MD03G1092700	Chr03:7764354|7764724	276
	MD03G1092700	Chr03:7764354|7765011	563
56	MD03G1103300	Chr03:8833026|8834997	976
	MD03G1103300	Chr03:8833026|8835735	1109
57	MD03G1118200	Chr03:10690093|10690386	294
	MD03G1118200	Chr03:10690168|10690339	172
58	MD03G1119200	Chr03:10903001|10911788	2552
	MD03G1119200	Chr03:10906701|10910069	817
59	MD03G1125200	Chr03:11818361|11818524	164
	MD03G1125200	Chr03:11818366|11818524	159
60	MD03G1134200	Chr03:13401260|13402324	731
	MD03G1134200	Chr03:13401890|13402324	435
61	MD03G1141100	Chr03:14861521|14861695	175
	MD03G1141100	Chr03:14861584|14861883	300
62	MD03G1150700	Chr03:16847534|16847827	294
	MD03G1150700	Chr03:16847534|16849028	474
63	MD03G1156800	Chr03:18452186|18452921	178
	MD03G1156800	Chr03:18452186|18458275	645
	MD03G1156800	Chr03:18456320|18458926	294
64	MD03G1159100	Chr03:18890793|18891193	284
	MD03G1159100	Chr03:18890852|18891211	243
65	MD03G1159900	Chr03:19096596|19097740	877
	MD03G1159900	Chr03:19097605|19097801	197
66	MD03G1171100	Chr03:23222245|23231334	2691
	MD03G1171100	Chr03:23224492|23225139	648
67	MD03G1172500	Chr03:23527221|23533097	771
	MD03G1172500	Chr03:23530834|23534825	1658
	MD03G1172500	Chr03:23531926|23534825	566
68	MD03G1197400	Chr03:26959715|26959915	201
	MD03G1197400	Chr03:26959911|26960791	467
69	MD03G1199100	Chr03:27260178|27260351	174
	MD03G1199100	Chr03:27260178|27260438	261
70	MD03G1203900	Chr03:27853884|27854227	344
	MD03G1203900	Chr03:27853884|27854552	669
71	MD03G1210100	Chr03:28924704|28925192	489
	MD03G1210100	Chr03:28924917|28925192	276
	MD03G1210100	Chr03:28926057|28926299	243
	MD03G1210100	Chr03:28926103|28926345	243
	MD03G1210100	Chr03:28926196|28926345	150
	MD03G1210100	Chr03:28926223|28926437	215
72	MD03G1218900	Chr03:30340045|30340323	279
	MD03G1218900	Chr03:30340045|30340346	302
73	MD03G1219900	Chr03:30432412|30434545	945
	MD03G1219900	Chr03:30433997|30434545	427
74	MD03G1246300	Chr03:33333078|33336884	1337
	MD03G1246300	Chr03:33333290|33333421	132
75	MD03G1272700	Chr03:35610455|35612682	1359
	MD03G1272700	Chr03:35611691|35612273	366
76	MD04G1002300	Chr04:291739|294101	972
	MD04G1002300	Chr04:291739|297720	1540
	MD04G1002300	Chr04:292793|297720	1323
	MD04G1002300	Chr04:292793|298021	1467
77	MD04G1003000	Chr04:440129|440399	272
	MD04G1003000	Chr04:440314|440478	84
78	MD04G1003800	Chr04:533459|533948	316
	MD04G1003800	Chr04:533459|534351	483
79	MD04G1004800	Chr04:606705|609252	822
	MD04G1004800	Chr04:608208|609030	395
80	MD04G1007900	Chr04:893544|896062	935
	MD04G1007900	Chr04:894583|894751	169
81	MD04G1008000	Chr04:941557|941713	157
	MD04G1008000	Chr04:941569|941782	214
82	MD04G1012800	Chr04:1427253|1430651	2481
	MD04G1012800	Chr04:1427253|1432979	4202
	MD04G1012800	Chr04:1430439|1432979	1934
	MD04G1012800	Chr04:1432830|1432979	150
83	MD04G1028800	Chr04:3256485|3257108	451
	MD04G1028800	Chr04:3256709|3258319	507
84	MD04G1031100	Chr04:3470908|3471838	931
	MD04G1031100	Chr04:3471613|3471774	162
85	MD04G1037300	Chr04:4159251|4168018	633
	MD04G1037300	Chr04:4167839|4168018	180
86	MD04G1037800	Chr04:4210999|4212686	386
	MD04G1037800	Chr04:4211209|4211868	661
87	MD04G1039200	Chr04:4300544|4300741	198
	MD04G1039200	Chr04:4300558|4300712	155
88	MD04G1043700	Chr04:5142953|5145201	1726
	MD04G1043700	Chr04:5144194|5145201	1008
89	MD04G1047300	Chr04:5525066|5525275	210
	MD04G1047300	Chr04:5525066|5525497	303
90	MD04G1060900	Chr04:8021693|8022746	581
	MD04G1060900	Chr04:8021693|8022993	716
91	MD04G1061500	Chr04:8135379|8135759	381
	MD04G1061500	Chr04:8135642|8135803	162
92	MD04G1062800	Chr04:8264471|8267516	1629
	MD04G1062800	Chr04:8264684|8264890	207
	MD04G1062800	Chr04:8267584|8269325	1742
	MD04G1062800	Chr04:8267599|8269325	1727
93	MD04G1069000	Chr04:9415469|9417075	955
	MD04G1069000	Chr04:9416601|9416962	362
94	MD04G1070200	Chr04:9590917|9595457	562
	MD04G1070200	Chr04:9594773|9595457	247
95	MD04G1079000	Chr04:10844519|10847430	510
	MD04G1079000	Chr04:10844711|10847430	393
	MD04G1079000	Chr04:10844711|10847789	576
	MD04G1079000	Chr04:10845715|10849070	853
96	MD04G1083900	Chr04:12183029|12184429	515
	MD04G1083900	Chr04:12183063|12183264	202
97	MD04G1100900	Chr04:18656194|18656421	228
	MD04G1100900	Chr04:18656419|18656646	228
	MD04G1100900	Chr04:18656472|18656699	228
98	MD04G1110900	Chr04:19557465|19557762	298
	MD04G1110900	Chr04:19557465|19558818	617
99	MD04G1125600	Chr04:21212788|21213209	422
	MD04G1125600	Chr04:21212975|21213243	269
	MD04G1125600	Chr04:21213181|21213558	378
	MD04G1125600	Chr04:21213202|21213410	209
	MD04G1125600	Chr04:21213211|21213558	348
	MD04G1125600	Chr04:21213214|21213393	180
	MD04G1125600	Chr04:21213223|21213410	188
	MD04G1125600	Chr04:21213244|21213410	167
100	MD04G1175700	Chr04:26679579|26679791	213
	MD04G1175700	Chr04:26679579|26681018	984
101	MD04G1194100	Chr04:28354532|28355649	955
	MD04G1194100	Chr04:28354539|28354697	159
102	MD04G1194200	Chr04:28362869|28363620	414
	MD04G1194200	Chr04:28363312|28363620	222
103	MD04G1205000	Chr04:29112689|29115556	1476
	MD04G1205000	Chr04:29113453|29113947	398
	MD04G1205000	Chr04:29113453|29115556	1027
104	MD04G1232200	Chr04:31141109|31141466	358
	MD04G1232200	Chr04:31141109|31142254	442
	MD04G1232200	Chr04:31141109|31143407	958
105	MD05G1004100	Chr05:1267097|1267699	433
	MD05G1004100	Chr05:1267097|1267877	525
106	MD05G1008600	Chr05:1858615|1858791	177
	MD05G1008600	Chr05:1858615|1858819	205
	MD05G1008600	Chr05:1858615|1858821	207
	MD05G1008600	Chr05:1858635|1858800	166
	MD05G1008600	Chr05:1858660|1858851	192
	MD05G1008600	Chr05:1858739|1858899	161
107	MD05G1021100	Chr05:3558011|3558350	340
	MD05G1021100	Chr05:3558024|3558185	162
	MD05G1021100	Chr05:3558135|3558302	168
108	MD05G1021200	Chr05:3583375|3588106	719
	MD05G1021200	Chr05:3587711|3588106	236
109	MD05G1025100	Chr05:4103762|4104125	364
	MD05G1025100	Chr05:4103762|4104135	374
	MD05G1025100	Chr05:4103762|4104141	381
	MD05G1025100	Chr05:4103762|4105345	1585
	MD05G1025100	Chr05:4103762|4105455	1695
	MD05G1025100	Chr05:4105082|4105455	374
110	MD05G1027100	Chr05:4303176|4303341	166
	MD05G1027100	Chr05:4303176|4303364	189
	MD05G1027100	Chr05:4303189|4303364	176
111	MD05G1029400	Chr05:4817939|4818647	477
	MD05G1029400	Chr05:4818185|4818647	339
112	MD05G1030700	Chr05:4915961|4917599	690
	MD05G1030700	Chr05:4916882|4917342	461
113	MD05G1037100	Chr05:5963808|5964954	452
	MD05G1037100	Chr05:5964118|5964954	142
114	MD05G1039700	Chr05:6755297|6756199	456
	MD05G1039700	Chr05:6755535|6755787	159
115	MD05G1045400	Chr05:7763306|7767954	835
	MD05G1045400	Chr05:7765555|7766683	447
116	MD05G1067500	Chr05:12704698|12705636	518
	MD05G1067500	Chr05:12704698|12706178	846
117	MD05G1074600	Chr05:15867679|15869470	942
	MD05G1074600	Chr05:15867679|15869644	1116
118	MD05G1087100	Chr05:18552224|18553167	657
	MD05G1087100	Chr05:18552224|18553980	723
	MD05G1087100	Chr05:18552224|18556454	1307
119	MD05G1107800	Chr05:22109554|22109757	204
	MD05G1107800	Chr05:22109667|22127389	2006
	MD05G1107800	Chr05:22123265|22128805	2217
	MD05G1107800	Chr05:22126135|22126854	399
120	MD05G1117800	Chr05:23877016|23877189	174
	MD05G1117800	Chr05:23877016|23877201	186
121	MD05G1145700	Chr05:27673678|27678603	1039
	MD05G1145700	Chr05:27675121|27678963	830
	MD05G1145700	Chr05:27675933|27678603	655
122	MD05G1185500	Chr05:31416057|31416211	155
	MD05G1185500	Chr05:31416120|31416274	156
123	MD05G1223500	Chr05:35628812|35629983	610
	MD05G1223500	Chr05:35628954|35629188	108
124	MD05G1235200	Chr05:36722755|36723970	666
	MD05G1235200	Chr05:36723668|36723970	215
125	MD05G1239900	Chr05:37082034|37082613	373
	MD05G1239900	Chr05:37082034|37082810	493
126	MD05G1240000	Chr05:37090627|37090815	189
	MD05G1240000	Chr05:37090801|37090988	188
	MD05G1240000	Chr05:37090801|37090991	191
	MD05G1240000	Chr05:37090801|37090994	194
	MD05G1240000	Chr05:37090801|37090997	197
127	MD05G1271700	Chr05:40706562|40708062	585
	MD05G1271700	Chr05:40706823|40708062	442
128	MD05G1275500	Chr05:40980990|40988358	505
	MD05G1275500	Chr05:40980990|40990298	1392
129	MD05G1310400	Chr05:44108966|44109199	234
	MD05G1310400	Chr05:44109158|44109337	90
	MD05G1310400	Chr05:44109263|44109448	186
130	MD05G1311900	Chr05:44188125|44188758	320
	MD05G1311900	Chr05:44188676|44188850	175
131	MD05G1313100	Chr05:44381265|44382944	835
	MD05G1313100	Chr05:44382510|44382765	257
132	MD05G1322800	Chr05:45008424|45009485	809
	MD05G1322800	Chr05:45008424|45009962	935
133	MD05G1341400	Chr05:46186476|46186703	228
	MD05G1341400	Chr05:46186553|46187236	684
	MD05G1341400	Chr05:46186676|46187131	456
	MD05G1341400	Chr05:46186682|46186908	227
	MD05G1341400	Chr05:46186697|46187152	456
	MD05G1341400	Chr05:46186704|46186931	228
	MD05G1341400	Chr05:46186704|46187159	456
	MD05G1341400	Chr05:46186820|46187014	195
	MD05G1341400	Chr05:46186820|46187046	227
	MD05G1341400	Chr05:46186904|46187131	228
	MD05G1341400	Chr05:46186904|46187167	264
	MD05G1341400	Chr05:46186925|46187152	228
	MD05G1341400	Chr05:46186932|46187159	228
	MD05G1341400	Chr05:46187160|46187331	172
	MD05G1341400	Chr05:46187160|46187334	175
134	MD05G1348100	Chr05:46665047|46665609	390
	MD05G1348100	Chr05:46665060|46665622	390
135	MD05G1358300	Chr05:47364641|47364802	162
	MD05G1358300	Chr05:47364767|47364958	192
136	MD06G1012300	Chr06:1535160|1535587	196
	MD06G1012300	Chr06:1535537|1536318	618
137	MD06G1015000	Chr06:1895384|1896799	887
	MD06G1015000	Chr06:1895921|1896799	350
138	MD06G1038500	Chr06:4937652|4943612	606
	MD06G1038500	Chr06:4943204|4943612	279
139	MD06G1043800	Chr06:5854295|5855376	399
	MD06G1043800	Chr06:5854712|5854920	209
	MD06G1043800	Chr06:5898930|5899791	519
	MD06G1043800	Chr06:5898930|5900447	1014
	MD06G1043800	Chr06:5900235|5900616	266
140	MD06G1055600	Chr06:8315538|8317824	1257
	MD06G1055600	Chr06:8317275|8318994	980
141	MD06G1057900	Chr06:8959477|8960369	485
	MD06G1057900	Chr06:8960123|8960962	459
142	MD06G1067000	Chr06:14250873|14252042	444
	MD06G1067000	Chr06:14251953|14252245	179
143	MD06G1079100	Chr06:19473179|19474419	1149
	MD06G1079100	Chr06:19473344|19473559	216
144	MD06G1082000	Chr06:20133988|20134507	431
	MD06G1082000	Chr06:20134033|20134507	386
145	MD06G1087900	Chr06:21494224|21495026	608
	MD06G1087900	Chr06:21494224|21495534	845
146	MD06G1137600	Chr06:28279692|28279877	186
	MD06G1137600	Chr06:28279692|28279880	189
147	MD06G1138200	Chr06:28321922|28322093	172
	MD06G1138200	Chr06:28321922|28322120	199
	MD06G1138200	Chr06:28321969|28322132	164
148	MD06G1161400	Chr06:30245866|30246612	747
	MD06G1161400	Chr06:30245883|30246176	294
149	MD06G1216300	Chr06:34846951|34847161	211
	MD06G1216300	Chr06:34847134|34847284	152
150	MD06G1237000	Chr06:36823094|36823276	183
	MD06G1237000	Chr06:36823115|36823315	201
151	MD07G1001800	Chr07:245880|251118	1970
	MD07G1001800	Chr07:249729|249921	194
152	MD07G1010700	Chr07:976818|976975	158
	MD07G1010700	Chr07:976866|977129	264
153	MD07G1020000	Chr07:1704076|1707343	826
	MD07G1020000	Chr07:1705416|1707343	339
154	MD07G1027700	Chr07:2314300|2317600	3204
	MD07G1027700	Chr07:2314300|2318003	3483
155	MD07G1034400	Chr07:2819231|2819572	342
	MD07G1034400	Chr07:2819411|2819572	162
156	MD07G1042400	Chr07:3556781|3558348	267
	MD07G1042400	Chr07:3558229|3559016	188
157	MD07G1045900	Chr07:3911838|3912430	593
	MD07G1045900	Chr07:3912098|3912250	153
158	MD07G1059600	Chr07:5536875|5537294	420
	MD07G1059600	Chr07:5536935|5537294	360
159	MD07G1087300	Chr07:9105270|9108377	665
	MD07G1087300	Chr07:9108087|9111491	521
160	MD07G1100100	Chr07:11019884|11021320	804
	MD07G1100100	Chr07:11020959|11021967	416
161	MD07G1111000	Chr07:12768124|12769140	273
	MD07G1111000	Chr07:12769044|12769237	195
162	MD07G1136900	Chr07:19972330|19972624	295
	MD07G1136900	Chr07:19972577|19972732	156
163	MD07G1149400	Chr07:21771437|21781927	5798
	MD07G1149400	Chr07:21778264|21781927	2544
164	MD07G1196500	Chr07:27480371|27480621	251
	MD07G1196500	Chr07:27480505|27480671	167
165	MD07G1223900	Chr07:30075093|30075379	287
	MD07G1223900	Chr07:30075093|30075930	572
	MD07G1223900	Chr07:30075093|30076631	847
166	MD07G1238700	Chr07:31047470|31047656	187
	MD07G1238700	Chr07:31047474|31047634	161
167	MD07G1252300	Chr07:32018395|32021145	758
	MD07G1252300	Chr07:32020364|32021145	350
168	MD07G1252500	Chr07:32031049|32032277	425
	MD07G1252500	Chr07:32032007|32032540	387
	MD07G1252500	Chr07:32032425|32033424	314
169	MD07G1257700	Chr07:32388745|32389203	459
	MD07G1257700	Chr07:32388859|32389024	166
170	MD07G1261100	Chr07:32681277|32681486	210
	MD07G1261100	Chr07:32681277|32681906	630
171	MD07G1289500	Chr07:35020192|35020358	167
	MD07G1289500	Chr07:35020192|35021030	294
172	MD08G1004500	Chr08:417923|418141	219
	MD08G1004500	Chr08:418025|418707	348
	MD08G1004500	Chr08:418067|418707	306
	MD08G1004500	Chr08:418149|418698	215
	MD08G1004500	Chr08:418169|418707	204
	MD08G1004500	Chr08:418172|418707	201
	MD08G1004500	Chr08:418684|418857	174
	MD08G1004500	Chr08:418708|418857	150
173	MD08G1009300	Chr08:691487|691832	239
	MD08G1009300	Chr08:691487|693211	486
174	MD08G1010800	Chr08:828019|828414	222
	MD08G1010800	Chr08:828283|828876	594
	MD08G1010800	Chr08:828316|828513	198
175	MD08G1015600	Chr08:1224849|1225074	226
	MD08G1015600	Chr08:1225043|1225323	281
176	MD08G1043100	Chr08:3255171|3256513	674
	MD08G1043100	Chr08:3255369|3255534	83
177	MD08G1074600	Chr08:6025586|6026467	311
	MD08G1074600	Chr08:6025586|6027280	737
178	MD08G1087700	Chr08:7253678|7253857	180
	MD08G1087700	Chr08:7253681|7253860	180
179	MD08G1095600	Chr08:8008507|8010507	429
	MD08G1095600	Chr08:8008507|8010533	455
180	MD08G1110400	Chr08:9705684|9708675	2131
	MD08G1110400	Chr08:9707196|9708669	1393
	MD08G1110400	Chr08:9707196|9708675	1399
181	MD08G1128800	Chr08:12110673|12110971	299
	MD08G1128800	Chr08:12110692|12110941	250
182	MD08G1162900	Chr08:19187634|19187810	177
	MD08G1162900	Chr08:19187638|19187796	159
183	MD08G1194100	Chr08:24962876|24963732	243
	MD08G1194100	Chr08:24962912|24963145	235
184	MD08G1197800	Chr08:25642556|25643472	494
	MD08G1197800	Chr08:25642806|25643466	374
185	MD08G1203800	Chr08:26356933|26357667	404
	MD08G1203800	Chr08:26356933|26363729	2346
	MD08G1203800	Chr08:26357322|26357479	159
	MD08G1203800	Chr08:26359957|26363729	1310
	MD08G1203800	Chr08:26362706|26363729	417
	MD08G1203800	Chr08:26363452|26363729	189
186	MD08G1211000	Chr08:27436180|27440164	1386
	MD08G1211000	Chr08:27436255|27436476	222
187	MD08G1211200	Chr08:27487260|27487989	730
	MD08G1211200	Chr08:27487568|27487726	159
188	MD08G1218200	Chr08:28071401|28071574	174
	MD08G1218200	Chr08:28071534|28071731	198
189	MD08G1230300	Chr08:29583747|29585477	1378
	MD08G1230300	Chr08:29584523|29584700	178
190	MD08G1241600	Chr08:30713522|30714958	612
	MD08G1241600	Chr08:30714265|30714958	411
191	MD08G1243300	Chr08:30869988|30871036	469
	MD08G1243300	Chr08:30870927|30871528	170
192	MD08G1244900	Chr08:30974585|30979658	778
	MD08G1244900	Chr08:30974585|30979662	782
193	MD09G1000100	Chr09:2404|14042	1005
	MD09G1000100	Chr09:2404|14335	1146
194	MD09G1000200	Chr09:37391|39191	510
	MD09G1000200	Chr09:37391|39356	592
195	MD09G1032000	Chr09:1924468|1927847	1224
	MD09G1032000	Chr09:1926753|1926908	156
196	MD09G1075900	Chr09:5356317|5357404	501
	MD09G1075900	Chr09:5356317|5359278	1008
197	MD09G1082900	Chr09:5805941|5808033	2093
	MD09G1082900	Chr09:5807071|5807229	159
	MD09G1082900	Chr09:5808197|5808633	355
	MD09G1082900	Chr09:5808197|5809674	819
198	MD09G1117200	Chr09:9003821|9004365	338
	MD09G1117200	Chr09:9003821|9004702	497
199	MD09G1119300	Chr09:9214731|9214943	213
	MD09G1119300	Chr09:9214736|9214938	203
	MD09G1119300	Chr09:9214736|9214943	208
	MD09G1119300	Chr09:9214755|9214938	184
200	MD09G1122500	Chr09:9443376|9443559	184
	MD09G1122500	Chr09:9443489|9443652	164
201	MD09G1131300	Chr09:10118821|10120904	816
	MD09G1131300	Chr09:10120554|10120904	229
202	MD09G1232600	Chr09:29017217|29017372	156
	MD09G1232600	Chr09:29017226|29017381	156
203	MD09G1243400	Chr09:31104225|31105673	464
	MD09G1243400	Chr09:31104591|31109015	1431
	MD09G1243400	Chr09:31107029|31108658	498
204	MD09G1262400	Chr09:33580071|33580220	150
	MD09G1262400	Chr09:33580071|33580226	156
	MD09G1262400	Chr09:33580071|33580319	249
	MD09G1262400	Chr09:33580152|33580353	202
205	MD09G1284300	Chr09:36196659|36198375	1032
	MD09G1284300	Chr09:36197047|36197196	150
206	MD10G1004400	Chr10:727197|727452	256
	MD10G1004400	Chr10:727388|727590	203
207	MD10G1009100	Chr10:1318344|1319443	546
	MD10G1009100	Chr10:1318843|1319443	354
208	MD10G1021700	Chr10:2699350|2699508	160
	MD10G1021700	Chr10:2699380|2699599	221
209	MD10G1021900	Chr10:2725733|2726102	214
	MD10G1021900	Chr10:2725733|2726121	233
210	MD10G1052500	Chr10:6965960|6967678	643
	MD10G1052500	Chr10:6967128|6967678	315
211	MD10G1057400	Chr10:7809296|7809461	166
	MD10G1057400	Chr10:7809331|7809838	508
212	MD10G1057600	Chr10:7819505|7821116	351
	MD10G1057600	Chr10:7819505|7821772	419
213	MD10G1075500	Chr10:10718073|10718307	235
	MD10G1075500	Chr10:10718142|10718347	206
	MD10G1075500	Chr10:10718163|10718347	185
214	MD10G1077100	Chr10:10929357|10930654	729
	MD10G1077100	Chr10:10930625|10930817	193
215	MD10G1081900	Chr10:12047048|12047750	239
	MD10G1081900	Chr10:12047048|12048207	444
	MD10G1081900	Chr10:12047048|12048525	500
216	MD10G1082200	Chr10:12103989|12105013	341
	MD10G1082200	Chr10:12103989|12107483	621
217	MD10G1087900	Chr10:13016771|13017130	360
	MD10G1087900	Chr10:13016944|13017111	168
218	MD10G1104300	Chr10:16996633|16997997	557
	MD10G1104300	Chr10:16997081|16997997	481
219	MD10G1127600	Chr10:20792919|20793094	176
	MD10G1127600	Chr10:20792937|20793115	179
220	MD10G1139800	Chr10:22451017|22453398	670
	MD10G1139800	Chr10:22453024|22455955	871
221	MD10G1142100	Chr10:22780313|22781525	1120
	MD10G1142100	Chr10:22780852|22781492	641
222	MD10G1164000	Chr10:25487013|25488323	1111
	MD10G1164000	Chr10:25488010|25488199	190
223	MD10G1206600	Chr10:30555169|30555507	339
	MD10G1206600	Chr10:30555189|30555419	231
	MD10G1206600	Chr10:30555212|30555469	258
224	MD10G1218000	Chr10:31623657|31624051	273
	MD10G1218000	Chr10:31623657|31625098	749
225	MD10G1257300	Chr10:35151466|35153952	1908
	MD10G1257300	Chr10:35153380|35153952	425
226	MD10G1277900	Chr10:36868041|36868256	216
	MD10G1277900	Chr10:36868041|36868313	273
227	MD10G1278900	Chr10:36990731|36993836	3011
	MD10G1278900	Chr10:36991551|36991706	156
228	MD10G1289000	Chr10:37815181|37817014	341
	MD10G1289000	Chr10:37815181|37817854	745
	MD10G1289000	Chr10:37815181|37818039	845
229	MD10G1289700	Chr10:37854711|37854872	162
	MD10G1289700	Chr10:37854768|37855004	237
230	MD10G1295300	Chr10:38288611|38288860	166
	MD10G1295300	Chr10:38288611|38289657	454
	MD10G1295300	Chr10:38288611|38290504	835
	MD10G1295300	Chr10:38288939|38290504	669
231	MD10G1314900	Chr10:39894817|39895044	228
	MD10G1314900	Chr10:39894817|39895272	456
	MD10G1314900	Chr10:39894868|39895071	204
	MD10G1314900	Chr10:39895045|39895272	228
	MD10G1314900	Chr10:39895273|39895500	228
	MD10G1314900	Chr10:39895473|39895700	228
	MD10G1314900	Chr10:39895488|39895700	213
	MD10G1314900	Chr10:39895501|39895728	228
	MD10G1314900	Chr10:39895701|39895928	228
	MD10G1314900	Chr10:39895722|39895949	228
	MD10G1314900	Chr10:39895950|39896112	163
	MD10G1314900	Chr10:39895950|39896145	196
	MD10G1314900	Chr10:39895957|39896128	172
	MD10G1314900	Chr10:39895957|39896131	175
232	MD10G1332000	Chr10:40959412|40959635	224
	MD10G1332000	Chr10:40959412|40960036	369
233	MD10G1332400	Chr10:40983142|40983501	360
	MD10G1332400	Chr10:40983155|40983355	201
	MD10G1332400	Chr10:40983232|40983416	185
	MD10G1332400	Chr10:40983319|40983501	183
	MD10G1332400	Chr10:40983350|40983528	179
	MD10G1332400	Chr10:40983352|40983501	150
234	MD10G1342300	Chr10:41715401|41716061	343
	MD10G1342300	Chr10:41715401|41725196	612
235	MD11G1037400	Chr11:3204706|3205224	519
	MD11G1037400	Chr11:3204966|3205227	262
236	MD11G1046800	Chr11:4069866|4072099	1641
	MD11G1046800	Chr11:4069866|4072745	2013
237	MD11G1069900	Chr11:5978868|5979087	220
	MD11G1069900	Chr11:5978947|5979099	153
238	MD11G1109200	Chr11:9653472|9653646	175
	MD11G1109200	Chr11:9653511|9653814	304
239	MD11G1117100	Chr11:10604609|10605103	418
	MD11G1117100	Chr11:10604745|10607469	1109
240	MD11G1119700	Chr11:10900927|10903067	950
	MD11G1119700	Chr11:10902490|10902639	150
241	MD11G1134700	Chr11:12396339|12397116	488
	MD11G1134700	Chr11:12396984|12397350	287
242	MD11G1149200	Chr11:14124330|14126030	660
	MD11G1149200	Chr11:14125422|14126030	363
243	MD11G1151700	Chr11:14452617|14453703	485
	MD11G1151700	Chr11:14452848|14453016	170
244	MD11G1156300	Chr11:15034707|15034895	189
	MD11G1156300	Chr11:15034842|15034994	153
	MD11G1156300	Chr11:15034842|15035077	236
245	MD11G1160100	Chr11:15700455|15703149	712
	MD11G1160100	Chr11:15702182|15703149	528
	MD11G1160100	Chr11:15702182|15703441	821
	MD11G1160100	Chr11:15702466|15703149	351
246	MD11G1173100	Chr11:19966487|19966969	375
	MD11G1173100	Chr11:19966558|19966969	304
247	MD11G1181200	Chr11:22246239|22248277	312
	MD11G1181200	Chr11:22248050|22249316	830
248	MD11G1182700	Chr11:22533609|22537596	1399
	MD11G1182700	Chr11:22533823|22536198	371
	MD11G1182700	Chr11:22533831|22536198	363
	MD11G1182700	Chr11:22536005|22536198	194
249	MD11G1221900	Chr11:32507828|32508704	877
	MD11G1221900	Chr11:32507828|32510516	1746
	MD11G1221900	Chr11:32507976|32508198	223
	MD11G1221900	Chr11:32508222|32508407	186
	MD11G1221900	Chr11:32508264|32508479	216
250	MD11G1237500	Chr11:34537702|34543086	1158
	MD11G1237500	Chr11:34539563|34540057	387
251	MD11G1243000	Chr11:35317089|35319006	643
	MD11G1243000	Chr11:35317089|35319031	668
252	MD11G1247800	Chr11:35979915|35981796	956
	MD11G1247800	Chr11:35981000|35981796	552
253	MD11G1251000	Chr11:36311917|36316382	491
	MD11G1251000	Chr11:36311917|36317001	632
	MD11G1251000	Chr11:36311917|36318366	884
	MD11G1251000	Chr11:36311917|36318654	971
254	MD11G1258100	Chr11:37068901|37072117	2132
	MD11G1258100	Chr11:37071519|37072117	417
	MD11G1258100	Chr11:37071537|37072117	399
255	MD11G1270500	Chr11:38612428|38612583	156
	MD11G1270500	Chr11:38612431|38612581	151
256	MD12G1015000	Chr12:1542329|1542769	441
	MD12G1015000	Chr12:1542427|1542591	165
257	MD12G1017600	Chr12:1702036|1702199	164
	MD12G1017600	Chr12:1702190|1702997	525
258	MD12G1033300	Chr12:3684779|3686135	494
	MD12G1033300	Chr12:3685973|3687781	367
259	MD12G1057400	Chr12:6545749|6547107	520
	MD12G1057400	Chr12:6545749|6557188	674
260	MD12G1066700	Chr12:7908215|7910606	375
	MD12G1066700	Chr12:7910087|7910237	151
261	MD12G1066800	Chr12:7918073|7918584	281
	MD12G1066800	Chr12:7918073|7919133	637
262	MD12G1093800	Chr12:12381402|12388020	879
	MD12G1093800	Chr12:12383383|12385692	334
263	MD12G1095800	Chr12:13257557|13260964	838
	MD12G1095800	Chr12:13257557|13261810	1051
	MD12G1095800	Chr12:13260428|13260964	339
264	MD12G1107400	Chr12:16956812|16957255	444
	MD12G1107400	Chr12:16957033|16957201	169
265	MD12G1111300	Chr12:17669085|17669266	182
	MD12G1111300	Chr12:17669085|17669290	206
266	MD12G1113000	Chr12:17893535|17893824	290
	MD12G1113000	Chr12:17893535|17894396	369
267	MD12G1120600	Chr12:19329689|19329916	228
	MD12G1120600	Chr12:19329745|19329916	172
	MD12G1120600	Chr12:19329914|19330141	228
	MD12G1120600	Chr12:19329967|19330194	228
	MD12G1120600	Chr12:19330142|19330369	228
	MD12G1120600	Chr12:19330195|19330422	228
268	MD12G1120700	Chr12:19363769|19363996	228
	MD12G1120700	Chr12:19363994|19364221	228
269	MD12G1125800	Chr12:20110423|20111028	383
	MD12G1125800	Chr12:20110630|20112204	681
270	MD12G1131200	Chr12:20645670|20645936	267
	MD12G1131200	Chr12:20645787|20645936	150
271	MD12G1141500	Chr12:22000016|22000195	180
	MD12G1141500	Chr12:22000032|22000195	164
	MD12G1141500	Chr12:22000032|22000212	181
	MD12G1141500	Chr12:22000042|22000273	232
	MD12G1141500	Chr12:22000042|22000304	263
	MD12G1141500	Chr12:22000042|22000311	270
	MD12G1141500	Chr12:22000057|22000239	183
	MD12G1141500	Chr12:22000057|22000247	191
	MD12G1141500	Chr12:22000057|22000254	198
272	MD12G1143300	Chr12:22253741|22255402	623
	MD12G1143300	Chr12:22254007|22254335	330
273	MD12G1198800	Chr12:27979582|27979737	156
	MD12G1198800	Chr12:27979714|27979881	168
274	MD12G1206600	Chr12:28699196|28700120	358
	MD12G1206600	Chr12:28699966|28700540	575
	MD12G1206600	Chr12:28700090|28700418	329
275	MD12G1227700	Chr12:30324139|30329211	1000
	MD12G1227700	Chr12:30326931|30329211	253
276	MD12G1256600	Chr12:32419974|32420153	180
	MD12G1256600	Chr12:32420136|32420291	156
277	MD12G1258400	Chr12:32530043|32531987	914
	MD12G1258400	Chr12:32530682|32531487	427
278	MD13G1006200	Chr13:388434|388609	176
	MD13G1006200	Chr13:388447|388622	176
279	MD13G1006400	Chr13:405625|405750	126
	MD13G1006400	Chr13:405736|406104	126
280	MD13G1010700	Chr13:650285|650839	473
	MD13G1010700	Chr13:650360|650717	276
281	MD13G1014300	Chr13:898990|899213	224
	MD13G1014300	Chr13:899025|899213	189
282	MD13G1049500	Chr13:3511913|3512129	218
	MD13G1049500	Chr13:3511918|3512125	208
283	MD13G1059000	Chr13:4113556|4113752	197
	MD13G1059000	Chr13:4113583|4113786	204
	MD13G1059000	Chr13:4113594|4113786	193
	MD13G1059000	Chr13:4113624|4113779	156
284	MD13G1065700	Chr13:4547355|4547510	156
	MD13G1065700	Chr13:4547355|4547666	312
285	MD13G1078600	Chr13:5520892|5522319	1006
	MD13G1078600	Chr13:5521964|5523555	786
286	MD13G1078800	Chr13:5529752|5531771	870
	MD13G1078800	Chr13:5530498|5530768	189
287	MD13G1085000	Chr13:5971441|5974692	1964
	MD13G1085000	Chr13:5972825|5973190	366
288	MD13G1089000	Chr13:6234528|6234766	239
	MD13G1089000	Chr13:6234590|6234778	189
289	MD13G1089500	Chr13:6275814|6276670	473
	MD13G1089500	Chr13:6275984|6276670	384
290	MD13G1111300	Chr13:8084854|8085155	302
	MD13G1111300	Chr13:8084947|8085343	397
291	MD13G1136900	Chr13:10528747|10528959	213
	MD13G1136900	Chr13:10528957|10529106	150
292	MD13G1149400	Chr13:11732647|11734131	668
	MD13G1149400	Chr13:11732880|11734131	509
293	MD13G1150500	Chr13:11796141|11796344	204
	MD13G1150500	Chr13:11796141|11796639	306
294	MD13G1161400	Chr13:12714944|12715179	236
	MD13G1161400	Chr13:12714956|12715163	208
295	MD13G1170300	Chr13:13831571|13831971	277
	MD13G1170300	Chr13:13831571|13832485	463
296	MD13G1196500	Chr13:17075182|17076227	973
	MD13G1196500	Chr13:17075638|17075898	261
297	MD13G1200600	Chr13:17842966|17843118	153
	MD13G1200600	Chr13:17843117|17843605	385
	MD13G1200600	Chr13:17843253|17843422	170
298	MD13G1208100	Chr13:19098796|19099007	212
	MD13G1208100	Chr13:19098833|19099007	175
299	MD13G1264800	Chr13:34219194|34219583	390
	MD13G1264800	Chr13:34219194|34219585	392
300	MD13G1279000	Chr13:39192689|39205170	2180
	MD13G1279000	Chr13:39195758|39202184	1449
301	MD13G1283100	Chr13:41728233|41734726	753
	MD13G1283100	Chr13:41733288|41734726	437
	MD13G1283100	Chr13:41733288|41735651	553
	MD13G1283100	Chr13:41733288|41747501	873
	MD13G1283100	Chr13:41735536|41747501	436
	MD13G1283100	Chr13:41745917|41746101	185
302	MD14G1000100	Chr14:15194|15720	527
	MD14G1000100	Chr14:15218|15722	505
303	MD14G1017400	Chr14:1614337|1615082	331
	MD14G1017400	Chr14:1614360|1615082	308
	MD14G1017400	Chr14:1614972|1615770	189
304	MD14G1032100	Chr14:2876372|2877798	444
	MD14G1032100	Chr14:2877333|2878373	447
	MD14G1032100	Chr14:2877333|2879264	750
305	MD14G1081800	Chr14:9418347|9418841	495
	MD14G1081800	Chr14:9418624|9421552	822
306	MD14G1087500	Chr14:10905168|10906340	597
	MD14G1087500	Chr14:10905168|10909358	1458
307	MD14G1113000	Chr14:18234235|18236614	809
	MD14G1113000	Chr14:18235980|18238795	1605
308	MD14G1143600	Chr14:23623698|23625744	1880
	MD14G1143600	Chr14:23623721|23625744	1857
309	MD14G1148000	Chr14:24078235|24079866	643
	MD14G1148000	Chr14:24078235|24086165	1033
	MD14G1148000	Chr14:24079414|24086165	725
310	MD14G1152400	Chr14:24665632|24665855	224
	MD14G1152400	Chr14:24665775|24665978	204
	MD14G1152400	Chr14:24665783|24665987	205
311	MD14G1154200	Chr14:24869609|24870327	526
	MD14G1154200	Chr14:24870078|24870327	250
312	MD14G1163600	Chr14:25765223|25766378	647
	MD14G1163600	Chr14:25765246|25766378	624
313	MD14G1169100	Chr14:26265716|26269113	1395
	MD14G1169100	Chr14:26267018|26269113	1076
314	MD14G1177400	Chr14:27070091|27070282	192
	MD14G1177400	Chr14:27070091|27070863	403
315	MD14G1191600	Chr14:28256409|28264656	5459
	MD14G1191600	Chr14:28259632|28263126	3495
	MD14G1191600	Chr14:28259632|28263133	3502
	MD14G1191600	Chr14:28259632|28263888	3816
	MD14G1191600	Chr14:28262875|28263133	259
	MD14G1191600	Chr14:28264501|28266945	952
	MD14G1191600	Chr14:28264501|28266952	959
316	MD14G1192000	Chr14:28295834|28296064	231
	MD14G1192000	Chr14:28295997|28296253	257
317	MD14G1201100	Chr14:29007961|29008155	195
	MD14G1201100	Chr14:29008012|29008206	195
318	MD14G1203800	Chr14:29208418|29210331	694
	MD14G1203800	Chr14:29208825|29209854	407
319	MD14G1214800	Chr14:29859033|29860007	537
	MD14G1214800	Chr14:29859581|29859847	267
320	MD14G1219700	Chr14:30203975|30204794	638
	MD14G1219700	Chr14:30204647|30206301	389
321	MD14G1231500	Chr14:31201594|31201821	228
	MD14G1231500	Chr14:31201661|31201821	161
322	MD14G1245900	Chr14:32368275|32370168	730
	MD14G1245900	Chr14:32369556|32370168	319
323	MD15G1003900	Chr15:238197|238373	177
	MD15G1003900	Chr15:238200|238373	174
324	MD15G1004400	Chr15:268493|268858	366
	MD15G1004400	Chr15:268493|269023	445
325	MD15G1006000	Chr15:341846|342361	329
	MD15G1006000	Chr15:342035|342361	224
326	MD15G1033000	Chr15:2313000|2313182	184
	MD15G1033000	Chr15:2313000|2313983	348
	MD15G1033000	Chr15:2313504|2314803	903
327	MD15G1055400	Chr15:3744456|3745506	603
	MD15G1055400	Chr15:3744819|3745506	462
328	MD15G1072600	Chr15:4950307|4950504	198
	MD15G1072600	Chr15:4950327|4950480	154
329	MD15G1098800	Chr15:6883391|6883561	171
	MD15G1098800	Chr15:6883413|6883582	170
330	MD15G1114900	Chr15:8104072|8105244	638
	MD15G1114900	Chr15:8104880|8105101	222
331	MD15G1126400	Chr15:9192190|9192965	243
	MD15G1126400	Chr15:9192816|9193704	283
332	MD15G1130800	Chr15:9444442|9444635	194
	MD15G1130800	Chr15:9444442|9444831	315
	MD15G1130800	Chr15:9445573|9445855	283
	MD15G1130800	Chr15:9445772|9446008	237
333	MD15G1133400	Chr15:9672472|9672666	195
	MD15G1133400	Chr15:9672475|9672669	195
334	MD15G1140800	Chr15:10388510|10388800	291
	MD15G1140800	Chr15:10388592|10388776	185
335	MD15G1142200	Chr15:10528814|10528989	176
	MD15G1142200	Chr15:10528814|10529741	322
336	MD15G1153000	Chr15:11328153|11328308	156
	MD15G1153000	Chr15:11328303|11328482	180
337	MD15G1201900	Chr15:16063721|16064935	393
	MD15G1201900	Chr15:16063721|16065365	505
338	MD15G1208500	Chr15:16642205|16642474	270
	MD15G1208500	Chr15:16642264|16642449	186
339	MD15G1227600	Chr15:18503655|18503806	152
	MD15G1227600	Chr15:18503655|18503863	209
340	MD15G1231000	Chr15:18907382|18909284	1801
	MD15G1231000	Chr15:18909120|18909284	165
341	MD15G1242600	Chr15:19954895|19955336	196
	MD15G1242600	Chr15:19954907|19955336	184
342	MD15G1249200	Chr15:20796998|20798411	1095
	MD15G1249200	Chr15:20797502|20798630	1038
343	MD15G1253900	Chr15:21424851|21425236	386
	MD15G1253900	Chr15:21424916|21425077	162
	MD15G1253900	Chr15:21424978|21425135	158
	MD15G1253900	Chr15:21425005|21425163	159
344	MD15G1291600	Chr15:26996858|26998176	202
	MD15G1291600	Chr15:26998066|26999562	499
345	MD15G1309700	Chr15:31097339|31099439	1103
	MD15G1309700	Chr15:31098903|31101261	625
346	MD15G1311400	Chr15:31402160|31406008	1305
	MD15G1311400	Chr15:31402160|31406600	1571
347	MD15G1313400	Chr15:31698431|31706505	809
	MD15G1313400	Chr15:31698442|31706505	798
	MD15G1313400	Chr15:31704565|31705576	421
	MD15G1313400	Chr15:31704565|31706505	703
348	MD15G1315100	Chr15:32108733|32108912	180
	MD15G1315100	Chr15:32108801|32108980	180
349	MD15G1336300	Chr15:37659654|37661076	727
	MD15G1336300	Chr15:37660848|37662097	841
350	MD15G1347000	Chr15:41056596|41057586	414
	MD15G1347000	Chr15:41056596|41057890	488
351	MD15G1372700	Chr15:45520813|45525055	1835
	MD15G1372700	Chr15:45524202|45525055	674
352	MD15G1385000	Chr15:47561412|47561636	225
	MD15G1385000	Chr15:47561457|47561855	399
	MD15G1385000	Chr15:47561567|47561791	225
353	MD15G1403700	Chr15:50463416|50464108	527
	MD15G1403700	Chr15:50463416|50464113	532
354	MD15G1404000	Chr15:50483543|50484228	345
	MD15G1404000	Chr15:50483951|50485040	278
355	MD15G1406000	Chr15:50669919|50670155	237
	MD15G1406000	Chr15:50669964|50670152	189
356	MD15G1427500	Chr15:52800013|52803025	1119
	MD15G1427500	Chr15:52800013|52810254	2466
	MD15G1427500	Chr15:52805877|52807347	440
357	MD15G1434100	Chr15:53439140|53443282	1051
	MD15G1434100	Chr15:53441528|53443282	526
358	MD15G1442200	Chr15:54266996|54267773	480
	MD15G1442200	Chr15:54266996|54268165	525
359	MD15G1446000	Chr15:54921767|54923244	989
	MD15G1446000	Chr15:54922226|54922810	455
360	MD16G1018300	Chr16:1336844|1337389	378
	MD16G1018300	Chr16:1337119|1337837	402
361	MD16G1026800	Chr16:1896546|1896737	192
	MD16G1026800	Chr16:1896557|1896737	181
362	MD16G1060200	Chr16:4322106|4322939	628
	MD16G1060200	Chr16:4322591|4322939	349
363	MD16G1061900	Chr16:4411526|4413373	943
	MD16G1061900	Chr16:4412166|4413373	625
364	MD16G1073500	Chr16:5157711|5158945	595
	MD16G1073500	Chr16:5158558|5159967	1158
365	MD16G1103100	Chr16:7224886|7225785	507
	MD16G1103100	Chr16:7224886|7226386	726
366	MD16G1109600	Chr16:7705710|7706268	314
	MD16G1109600	Chr16:7705710|7706491	379
367	MD16G1132300	Chr16:10088516|10088686	171
	MD16G1132300	Chr16:10088516|10088725	210
	MD16G1132300	Chr16:10088516|10088836	321
368	MD16G1167200	Chr16:13932953|13934250	406
	MD16G1167200	Chr16:13933953|13935245	390
369	MD16G1175900	Chr16:14917537|14917689	153
	MD16G1175900	Chr16:14917537|14918636	569
370	MD16G1176100	Chr16:14959081|14959277	197
	MD16G1176100	Chr16:14959081|14959668	588
371	MD16G1202300	Chr16:18399122|18400199	297
	MD16G1202300	Chr16:18399250|18400352	322
372	MD16G1232700	Chr16:23928106|23930458	370
	MD16G1232700	Chr16:23929220|23932161	666
	MD16G1232700	Chr16:23930706|23930913	208
373	MD16G1247900	Chr16:27691467|27696605	972
	MD16G1247900	Chr16:27691472|27696614	977
374	MD16G1250100	Chr16:28023480|28024668	1063
	MD16G1250100	Chr16:28023480|28025285	1148
375	MD16G1258600	Chr16:31263197|31263877	506
	MD16G1258600	Chr16:31263197|31263880	509
376	MD16G1282700	Chr16:38704133|38706733	778
	MD16G1282700	Chr16:38705761|38706006	246
377	MD17G1001400	Chr17:84014|85758	886
	MD17G1001400	Chr17:84773|85758	481
	MD17G1001400	Chr17:85415|85753	339
	MD17G1001400	Chr17:85415|85758	344
378	MD17G1016300	Chr17:1315991|1316822	277
	MD17G1016300	Chr17:1315991|1317937	637
379	MD17G1022100	Chr17:1642089|1642250	162
	MD17G1022100	Chr17:1642242|1642401	160
380	MD17G1027400	Chr17:1956367|1958576	2125
	MD17G1027400	Chr17:1956367|1963280	5929
	MD17G1027400	Chr17:1962205|1962404	200
	MD17G1027400	Chr17:1968250|1969933	1575
	MD17G1027400	Chr17:1969763|1971895	2055
	MD17G1027400	Chr17:1970174|1970353	180
	MD17G1027400	Chr17:1970829|1973063	2055
	MD17G1027400	Chr17:1972362|1972540	179
	MD17G1027400	Chr17:1972527|1972700	174
	MD17G1027400	Chr17:1972541|1972721	181
381	MD17G1030900	Chr17:2231350|2232768	397
	MD17G1030900	Chr17:2232563|2232768	206
382	MD17G1032200	Chr17:2345586|2346013	260
	MD17G1032200	Chr17:2345826|2346013	188
383	MD17G1035600	Chr17:2555708|2555999	292
	MD17G1035600	Chr17:2555708|2556760	727
	MD17G1035600	Chr17:2556566|2556748	183
384	MD17G1042300	Chr17:3102310|3102481	172
	MD17G1042300	Chr17:3102319|3102481	163
385	MD17G1081400	Chr17:6801601|6802278	393
	MD17G1081400	Chr17:6801601|6804751	1642
386	MD17G1089900	Chr17:7375435|7376070	295
	MD17G1089900	Chr17:7375536|7376050	174
387	MD17G1108500	Chr17:9310933|9311118	186
	MD17G1108500	Chr17:9310933|9311178	246
388	MD17G1110200	Chr17:9498575|9498805	231
	MD17G1110200	Chr17:9498575|9498883	309
	MD17G1110200	Chr17:9498575|9499060	486
	MD17G1110200	Chr17:9498592|9498836	245
	MD17G1110200	Chr17:9498735|9498890	156
	MD17G1110200	Chr17:9498735|9499185	451
	MD17G1110200	Chr17:9498746|9499060	315
	MD17G1110200	Chr17:9498773|9499060	288
	MD17G1110200	Chr17:9498773|9499093	321
	MD17G1110200	Chr17:9498788|9499006	219
	MD17G1110200	Chr17:9498788|9499027	240
	MD17G1110200	Chr17:9498788|9499060	273
	MD17G1110200	Chr17:9498794|9499027	234
	MD17G1110200	Chr17:9498797|9499027	231
	MD17G1110200	Chr17:9498797|9499033	237
	MD17G1110200	Chr17:9498797|9499060	264
	MD17G1110200	Chr17:9498834|9499085	252
	MD17G1110200	Chr17:9498845|9499027	183
	MD17G1110200	Chr17:9498848|9499027	180
	MD17G1110200	Chr17:9498848|9499072	225
	MD17G1110200	Chr17:9498863|9499027	165
	MD17G1110200	Chr17:9498891|9499100	210
	MD17G1110200	Chr17:9498920|9499093	174
	MD17G1110200	Chr17:9498926|9499093	168
	MD17G1110200	Chr17:9499025|9499201	177
	MD17G1110200	Chr17:9499028|9499201	174
	MD17G1110200	Chr17:9499035|9499201	167
389	MD17G1134800	Chr17:12082025|12082775	408
	MD17G1134800	Chr17:12082154|12082717	221
390	MD17G1139600	Chr17:12554808|12555795	893
	MD17G1139600	Chr17:12555437|12555793	357
391	MD17G1152400	Chr17:14094769|14094935	167
	MD17G1152400	Chr17:14094924|14095077	154
392	MD17G1156800	Chr17:15081888|15085879	757
	MD17G1156800	Chr17:15084045|15085879	543
393	MD17G1178100	Chr17:20385377|20386690	809
	MD17G1178100	Chr17:20385818|20386690	562
	MD17G1178100	Chr17:20386206|20386690	298
394	MD17G1180500	Chr17:20968265|20968553	289
	MD17G1180500	Chr17:20968412|20968636	225
	MD17G1180500	Chr17:20968499|20968648	150
395	MD17G1188900	Chr17:22522125|22526067	1346
	MD17G1188900	Chr17:22522716|22523574	202
	MD17G1188900	Chr17:22522716|22524607	694
396	MD17G1189400	Chr17:22569624|22569848	225
	MD17G1189400	Chr17:22569698|22569866	169
397	MD17G1217000	Chr17:26385510|26387907	435
	MD17G1217000	Chr17:26385510|26392348	870
398	MD17G1266600	Chr17:32700261|32703841	968
	MD17G1266600	Chr17:32702680|32703072	393
399	Apple_newGene_17957	Chr16:38914884|38918997	4114
	Apple_newGene_17957	Chr16:38914906|38915081	176
	Apple_newGene_17957	Chr16:38914995|38915171	177
	Apple_newGene_17957	Chr16:38915016|38918997	3982
	Apple_newGene_17957	Chr16:38918637|38918801	165
	Apple_newGene_17957	Chr16:38918700|38918975	276
	Apple_newGene_17957	Chr16:38918789|38919107	319
	Apple_newGene_17957	Chr16:38919032|38919308	277
400	Apple_newGene_17958	Chr16:38918692|38918889	198
	Apple_newGene_17958	Chr16:38918789|38919064	276
	Apple_newGene_17958	Chr16:38918823|38919107	285
401	Apple_newGene_21821	Chr02:4224898|4292970	7313
	Apple_newGene_21821	Chr02:4261529|4343053	17035
	Apple_newGene_21821	Chr02:4369356|4391452	6863
	Apple_newGene_21821	Chr02:4369356|4392158	7569
	Apple_newGene_21821	Chr02:4369356|4467533	9327
	Apple_newGene_21821	Chr02:4464873|4465315	443
402	Apple_newGene_21981	Chr02:5804251|5822696	2431
	Apple_newGene_21981	Chr02:5804251|5824412	3213
	Apple_newGene_21981	Chr02:5804408|5824569	3213
	Apple_newGene_21981	Chr02:5804563|5824815	3305
	Apple_newGene_21981	Chr02:5805212|5825377	3213
	Apple_newGene_21981	Chr02:5806096|5807135	997
	Apple_newGene_21981	Chr02:5806750|5827003	3213
	Apple_newGene_21981	Chr02:5899715|5904809	1975
	Apple_newGene_21981	Chr02:5899980|5905006	1881
	Apple_newGene_21981	Chr02:5900304|5905219	1881
	Apple_newGene_21981	Chr02:5901303|5905667	1881
403	Apple_newGene_27815	Chr03:25744122|25744286	165
	Apple_newGene_27815	Chr03:25744210|25749687	5478
404	Apple_newGene_32886	Chr05:2597641|2599039	1399
	Apple_newGene_32886	Chr05:2597641|2599044	1404
405	Apple_newGene_3913	Chr13:26514501|26518085	3585
	Apple_newGene_3913	Chr13:26516868|26518085	1218
406	Apple_newGene_44570	Chr07:33828787|33830463	1677
	Apple_newGene_44570	Chr07:33829092|33830340	1249
407	Apple_newGene_45510	Chr08:5033622|5040704	7083
	Apple_newGene_45510	Chr08:5033690|5040772	7083
	Apple_newGene_45510	Chr08:5034497|5041577	7081
408	Intergenic_1	Chr00:1459129|1469309	10181
	Intergenic_1	Chr00:1459641|1469268	9628
409	Intergenic_2	Chr00:3698239|3759148	60910
	Intergenic_2	Chr00:3729442|3801295	71854
	Intergenic_2	Chr00:3729763|3736072	6310
	Intergenic_2	Chr00:3731399|3734758	3360
	Intergenic_2	Chr00:3731399|3803321	71923
410	Intergenic_3	Chr00:6748206|6748381	176
	Intergenic_3	Chr00:6748216|6748474	259
	Intergenic_3	Chr00:6748226|6748456	231
	Intergenic_3	Chr00:6748244|6748474	231
411	Intergenic_4	Chr00:6754479|6754661	183
	Intergenic_4	Chr00:6754498|6754687	190
412	Intergenic_5	Chr01:14680137|14684684	4548
	Intergenic_5	Chr01:14682125|14684994	2870
413	Intergenic_6	Chr01:16266349|16285402	19054
	Intergenic_6	Chr01:16284830|16295955	11126
414	Intergenic_7	Chr01:16598636|16615159	16524
	Intergenic_7	Chr01:16604062|16636641	32580
	Intergenic_7	Chr01:16619805|16651910	32106
	Intergenic_7	Chr01:16619916|16651894	31979
	Intergenic_7	Chr01:16628567|16665077	36511
415	Intergenic_8	Chr01:18439239|18443002	3764
	Intergenic_8	Chr01:18439727|18444400	4674
	Intergenic_8	Chr01:18439745|18444400	4656
	Intergenic_8	Chr01:18439787|18444715	4929
416	Intergenic_9	Chr01:20689524|20694912	5389
	Intergenic_9	Chr01:20690041|20706016	15976
417	Intergenic_10	Chr01:20773827|20845894	72068
	Intergenic_10	Chr01:20780435|20826822	46388
	Intergenic_10	Chr01:20780435|20878427	97993
	Intergenic_10	Chr01:20781322|20827613	46292
	Intergenic_10	Chr01:20782435|20828279	45845
418	Intergenic_11	Chr01:20984386|21020443	36058
	Intergenic_11	Chr01:20985000|21020967	35968
	Intergenic_11	Chr01:20986935|21022536	35602
419	Intergenic_12	Chr01:25874810|25921003	46194
	Intergenic_12	Chr01:25914991|25925094	10104
420	Intergenic_13	Chr01:26714193|26723574	9382
	Intergenic_13	Chr01:26714329|26723516	9188
	Intergenic_13	Chr01:26714597|26723984	9388
	Intergenic_13	Chr01:26716255|26717346	1092
421	Intergenic_14	Chr01:27381081|27387550	6470
	Intergenic_14	Chr01:27382003|27388581	6579
422	Intergenic_15	Chr01:27862339|27920944	58606
	Intergenic_15	Chr01:27862350|27920944	58595
	Intergenic_15	Chr01:27862388|27920944	58557
	Intergenic_15	Chr01:27863192|27921821	58630
	Intergenic_15	Chr01:27863855|27921821	57967
	Intergenic_15	Chr01:27864103|27921821	57719
	Intergenic_15	Chr01:27874127|27951720	77594
423	Intergenic_16	Chr01:27955025|27993092	38068
	Intergenic_16	Chr01:27955215|27993150	37936
424	Intergenic_17	Chr01:29260568|29271137	10570
	Intergenic_17	Chr01:29260969|29272256	11288
425	Intergenic_18	Chr01:30955995|31005215	49221
	Intergenic_18	Chr01:30957207|31007243	50037
	Intergenic_18	Chr01:30991653|31009966	18314
426	Intergenic_19	Chr01:32251088|32267746	16659
	Intergenic_19	Chr01:32266676|32283069	16394
427	Intergenic_20	Chr01:32457911|32471620	13710
	Intergenic_20	Chr01:32468533|32479579	11047
428	Intergenic_21	Chr02:6734|7463	730
	Intergenic_21	Chr02:7007|10489	3483
429	Intergenic_22	Chr02:196131|205898	9768
	Intergenic_22	Chr02:198351|208572	10222
430	Intergenic_23	Chr02:545876|548210	2335
	Intergenic_23	Chr02:545896|548210	2315
431	Intergenic_24	Chr02:558667|561878	3212
	Intergenic_24	Chr02:558667|562968	4302
432	Intergenic_25	Chr02:1397323|1408565	11243
	Intergenic_25	Chr02:1397876|1409357	11482
	Intergenic_25	Chr02:1397876|1409378	11503
433	Intergenic_26	Chr02:1414350|1435794	21445
	Intergenic_26	Chr02:1414475|1439751	25277
434	Intergenic_27	Chr02:1527682|1540224	12543
	Intergenic_27	Chr02:1527775|1540317	12543
	Intergenic_27	Chr02:1528156|1540698	12543
	Intergenic_27	Chr02:1534273|1548544	14272
	Intergenic_27	Chr02:1539769|1550117	10349
435	Intergenic_28	Chr02:1811332|1830793	19462
	Intergenic_28	Chr02:1817866|1842811	24946
436	Intergenic_29	Chr02:2692558|2705027	12470
	Intergenic_29	Chr02:2693336|2705457	12122
	Intergenic_29	Chr02:2694909|2707386	12478
437	Intergenic_30	Chr02:3284078|3352367	68290
	Intergenic_30	Chr02:3284078|3352374	68297
	Intergenic_30	Chr02:3289986|3364703	74718
	Intergenic_30	Chr02:3348218|3384556	36339
438	Intergenic_31	Chr02:3536979|3548107	11129
	Intergenic_31	Chr02:3539235|3549287	10053
	Intergenic_31	Chr02:3543277|3551083	7807
439	Intergenic_32	Chr02:3896515|3905509	8995
	Intergenic_32	Chr02:3902525|3906295	3771
	Intergenic_32	Chr02:3902820|3906316	3497
440	Intergenic_33	Chr02:3908857|3918611	9755
	Intergenic_33	Chr02:3910729|3919361	8633
	Intergenic_33	Chr02:3910906|3919538	8633
441	Intergenic_34	Chr02:4890120|4914867	24748
	Intergenic_34	Chr02:4890590|4915471	24882
442	Intergenic_35	Chr02:5205456|5233799	28344
	Intergenic_35	Chr02:5209515|5241259	31745
443	Intergenic_36	Chr02:5494414|5499654	5241
	Intergenic_36	Chr02:5495289|5500728	5440
	Intergenic_36	Chr02:5496175|5501564	5390
444	Intergenic_37	Chr02:5662688|5737788	75101
	Intergenic_37	Chr02:5664637|5739420	74784
	Intergenic_37	Chr02:5667016|5759649	92634
	Intergenic_37	Chr02:5667448|5760178	92731
	Intergenic_37	Chr02:5667452|5760103	92652
	Intergenic_37	Chr02:5668988|5710211	41224
	Intergenic_37	Chr02:5668988|5760828	91841
	Intergenic_37	Chr02:5669871|5697233	27363
	Intergenic_37	Chr02:5669955|5697317	27363
	Intergenic_37	Chr02:5677203|5748000	70798
	Intergenic_37	Chr02:5694232|5771250	77019
	Intergenic_37	Chr02:5694747|5727698	32952
	Intergenic_37	Chr02:5695093|5709370	14278
	Intergenic_37	Chr02:5696207|5774819	78613
	Intergenic_37	Chr02:5733449|5772576	39128
	Intergenic_37	Chr02:5734165|5772834	38670
	Intergenic_37	Chr02:5734165|5772872	38708
	Intergenic_37	Chr02:5734508|5773242	38735
445	Intergenic_38	Chr02:5747857|5781815	33959
	Intergenic_38	Chr02:5772362|5824787	52426
446	Intergenic_39	Chr02:5997996|6018120	20125
	Intergenic_39	Chr02:5999414|6019712	20299
447	Intergenic_40	Chr02:6108615|6163401	54787
	Intergenic_40	Chr02:6138594|6166287	27694
448	Intergenic_41	Chr02:7468112|7478467	10356
	Intergenic_41	Chr02:7468240|7478700	10461
449	Intergenic_42	Chr02:7677881|7747736	69856
	Intergenic_42	Chr02:7732433|7819288	86856
	Intergenic_42	Chr02:7737973|7820261	82289
	Intergenic_42	Chr02:7746060|7820849	74790
450	Intergenic_43	Chr02:7766880|7844685	77806
	Intergenic_43	Chr02:7766995|7845046	78052
	Intergenic_43	Chr02:7767575|7845629	78055
	Intergenic_43	Chr02:7830435|7855661	25227
	Intergenic_43	Chr02:7830841|7855979	25139
	Intergenic_43	Chr02:7831220|7856466	25247
	Intergenic_43	Chr02:7832915|7861169	28255
451	Intergenic_44	Chr02:8007498|8021718	14221
	Intergenic_44	Chr02:8010386|8023151	12766
452	Intergenic_45	Chr02:8485529|8543472	57944
	Intergenic_45	Chr02:8486133|8544082	57950
	Intergenic_45	Chr02:8487796|8545746	57951
	Intergenic_45	Chr02:8487969|8545907	57939
	Intergenic_45	Chr02:8488250|8546281	58032
	Intergenic_45	Chr02:8488543|8546465	57923
	Intergenic_45	Chr02:8488978|8546934	57957
	Intergenic_45	Chr02:8516331|8538247	21917
	Intergenic_45	Chr02:8521785|8538733	16949
	Intergenic_45	Chr02:8532072|8542061	9990
	Intergenic_45	Chr02:8532328|8542449	10122
	Intergenic_45	Chr02:8537582|8541163	3582
453	Intergenic_46	Chr02:10135354|10140742	5389
	Intergenic_46	Chr02:10135454|10140966	5513
	Intergenic_46	Chr02:10135577|10141002	5426
454	Intergenic_47	Chr02:10416128|10435182	19055
	Intergenic_47	Chr02:10416568|10435570	19003
	Intergenic_47	Chr02:10417903|10436890	18988
455	Intergenic_48	Chr02:10511434|10522178	10745
	Intergenic_48	Chr02:10516315|10522178	5864
456	Intergenic_49	Chr02:12203361|12210314	6954
	Intergenic_49	Chr02:12203529|12210501	6973
	Intergenic_49	Chr02:12203647|12210619	6973
	Intergenic_49	Chr02:12203933|12210910	6978
	Intergenic_49	Chr02:12204595|12211630	7036
	Intergenic_49	Chr02:12205066|12219229	14164
	Intergenic_49	Chr02:12205066|12219238	14173
457	Intergenic_50	Chr02:14028024|14070675	42652
	Intergenic_50	Chr02:14042809|14070197	27389
	Intergenic_50	Chr02:14043851|14083404	39554
458	Intergenic_51	Chr02:14085324|14115564	30241
	Intergenic_51	Chr02:14085830|14116224	30395
459	Intergenic_52	Chr02:28223787|28235408	11622
	Intergenic_52	Chr02:28225751|28248402	22652
	Intergenic_52	Chr02:29236876|29252120	15245
460	Intergenic_53	Chr02:29632401|29660564	28164
	Intergenic_53	Chr02:29634544|29662708	28165
461	Intergenic_54	Chr02:30310247|30403956	93710
	Intergenic_54	Chr02:30311908|30404274	92367
462	Intergenic_55	Chr02:31360309|31404547	44239
	Intergenic_55	Chr02:31360484|31404191	43708
	Intergenic_55	Chr02:31360538|31404777	44240
	Intergenic_55	Chr02:31360798|31405037	44240
	Intergenic_55	Chr02:31364294|31392613	28320
	Intergenic_55	Chr02:31366500|31401832	35333
	Intergenic_55	Chr02:31367896|31403292	35397
463	Intergenic_56	Chr02:31783075|31800852	17778
	Intergenic_56	Chr02:31783352|31801020	17669
464	Intergenic_57	Chr02:31965494|31967044	1551
	Intergenic_57	Chr02:31966047|31967044	998
465	Intergenic_58	Chr02:32078199|32078445	247
	Intergenic_58	Chr02:32078239|32078523	285
466	Intergenic_59	Chr02:32119230|32131999	12770
	Intergenic_59	Chr02:32122051|32134466	12416
467	Intergenic_60	Chr02:32602780|32609509	6730
	Intergenic_60	Chr02:32602861|32608594	5734
	Intergenic_60	Chr02:32605467|32611742	6276
468	Intergenic_61	Chr02:34293412|34326406	32995
	Intergenic_61	Chr02:34296660|34311349	14690
	Intergenic_61	Chr02:34301374|34371448	70075
	Intergenic_61	Chr02:34301580|34371654	70075
	Intergenic_61	Chr02:34303346|34373405	70060
469	Intergenic_62	Chr02:34814027|34832176	18150
	Intergenic_62	Chr02:34814084|34832233	18150
470	Intergenic_63	Chr02:35452746|35460296	7551
	Intergenic_63	Chr02:35452922|35460472	7551
	Intergenic_63	Chr02:35453388|35460938	7551
471	Intergenic_64	Chr02:35690969|35783690	92722
	Intergenic_64	Chr02:35719122|35742554	23433
472	Intergenic_65	Chr02:37411522|37411696	175
	Intergenic_65	Chr02:37411522|37411702	181
473	Intergenic_66	Chr03:664019|759770	95752
	Intergenic_66	Chr03:759475|780117	20643
	Intergenic_66	Chr03:761137|787132	25996
	Intergenic_66	Chr03:761986|787761	25776
474	Intergenic_67	Chr03:1221600|1272710	51111
	Intergenic_67	Chr03:1222936|1254714	31779
	Intergenic_67	Chr03:1224148|1255926	31779
	Intergenic_67	Chr03:1226435|1257347	30913
	Intergenic_67	Chr03:1226435|1277176	50742
	Intergenic_67	Chr03:1228997|1257779	28783
	Intergenic_67	Chr03:1231748|1277938	46191
	Intergenic_67	Chr03:1237382|1257347	19966
	Intergenic_67	Chr03:1259551|1276955	17405
475	Intergenic_68	Chr03:1377275|1443567	66293
	Intergenic_68	Chr03:1377368|1443660	66293
476	Intergenic_69	Chr03:2040881|2078717	37837
	Intergenic_69	Chr03:2064590|2107872	43283
	Intergenic_69	Chr03:2089801|2131827	42027
	Intergenic_69	Chr03:2090790|2133103	42314
	Intergenic_69	Chr03:2094888|2137408	42521
	Intergenic_69	Chr03:2100833|2152541	51709
477	Intergenic_70	Chr03:2354287|2361619	7333
	Intergenic_70	Chr03:2354914|2362148	7235
	Intergenic_70	Chr03:2356089|2363174	7086
478	Intergenic_71	Chr03:2637517|2697073	59557
	Intergenic_71	Chr03:2640943|2700345	59403
479	Intergenic_72	Chr03:3003057|3087807	84751
	Intergenic_72	Chr03:3015771|3073362	57592
480	Intergenic_73	Chr03:3853849|3946372	92524
	Intergenic_73	Chr03:3854592|3949531	94940
	Intergenic_73	Chr03:3889070|3923118	34049
	Intergenic_73	Chr03:3890285|3924525	34241
	Intergenic_73	Chr03:3945111|3956427	11317
	Intergenic_73	Chr03:3945122|3956241	11120
	Intergenic_73	Chr03:3945122|3956427	11306
	Intergenic_73	Chr03:3945122|3957131	12010
	Intergenic_73	Chr03:3945132|3956427	11296
481	Intergenic_74	Chr03:4077190|4096439	19250
	Intergenic_74	Chr03:4090215|4113832	23618
482	Intergenic_75	Chr03:5085992|5103422	17431
	Intergenic_75	Chr03:5086358|5103783	17426
	Intergenic_75	Chr03:5086834|5103422	16589
	Intergenic_75	Chr03:5087499|5104146	16648
483	Intergenic_76	Chr03:5372254|5383458	11205
	Intergenic_76	Chr03:5372485|5383689	11205
484	Intergenic_77	Chr03:6397108|6411282	14175
	Intergenic_77	Chr03:6404007|6410005	5999
	Intergenic_77	Chr03:6404588|6410058	5471
	Intergenic_77	Chr03:6407270|6410876	3607
485	Intergenic_78	Chr03:9398434|9408768	10335
	Intergenic_78	Chr03:9398434|9428603	30170
486	Intergenic_79	Chr03:22357591|22372673	15083
	Intergenic_79	Chr03:22357591|22372963	15373
	Intergenic_79	Chr03:22369725|22385034	15310
	Intergenic_79	Chr03:22369750|22385058	15309
487	Intergenic_80	Chr03:23223834|23257459	33626
	Intergenic_80	Chr03:23223885|23258080	34196
	Intergenic_80	Chr03:23226103|23258159	32057
	Intergenic_80	Chr03:23226636|23260799	34164
	Intergenic_80	Chr03:23229104|23263259	34156
	Intergenic_80	Chr03:23229394|23263540	34147
	Intergenic_80	Chr03:23230157|23263620	33464
488	Intergenic_81	Chr03:24828370|24869217	40848
	Intergenic_81	Chr03:24828370|24914226	85857
	Intergenic_81	Chr03:24841695|24844265	2571
489	Intergenic_82	Chr03:24869330|24913998	44669
	Intergenic_82	Chr03:24882206|24927824	45619
490	Intergenic_83	Chr03:26297307|26324247	26941
	Intergenic_83	Chr03:26310298|26336750	26453
	Intergenic_83	Chr03:26310773|26336846	26074
491	Intergenic_84	Chr03:27601104|27612581	11478
	Intergenic_84	Chr03:27601490|27613328	11839
	Intergenic_84	Chr03:27604103|27615621	11519
492	Intergenic_85	Chr03:31297070|31315819	18750
	Intergenic_85	Chr03:31297309|31316083	18775
493	Intergenic_86	Chr03:33130435|33153351	22917
	Intergenic_86	Chr03:33143139|33158460	15322
	Intergenic_86	Chr03:33144177|33159514	15338
494	Intergenic_87	Chr03:33891468|33900907	9440
	Intergenic_87	Chr03:33899983|33904122	4140
495	Intergenic_88	Chr03:34887742|34890085	2344
	Intergenic_88	Chr03:34887987|34890294	2308
496	Intergenic_89	Chr03:36074785|36122075	47291
	Intergenic_89	Chr03:36078452|36126044	47593
497	Intergenic_90	Chr03:36596335|36622026	25692
	Intergenic_90	Chr03:36604089|36623687	19599
498	Intergenic_91	Chr03:36631706|36633955	2250
	Intergenic_91	Chr03:36631964|36634436	2473
	Intergenic_91	Chr03:36631964|36643265	11302
	Intergenic_91	Chr03:36632157|36643593	11437
	Intergenic_91	Chr03:36633779|36637857	4079
	Intergenic_91	Chr03:36633861|36637817	3957
	Intergenic_91	Chr03:36633864|36637817	3954
499	Intergenic_92	Chr03:36760536|36766408	5873
	Intergenic_92	Chr03:36762871|36779189	16319
	Intergenic_92	Chr03:36764426|36781003	16578
500	Intergenic_93	Chr04:1102158|1106052	3895
	Intergenic_93	Chr04:1102602|1106717	4116
	Intergenic_93	Chr04:1102602|1108279	5678
501	Intergenic_94	Chr04:1458388|1511433	53046
	Intergenic_94	Chr04:1459523|1512534	53012
	Intergenic_94	Chr04:1459582|1512313	52732
	Intergenic_94	Chr04:1464399|1515359	50961
	Intergenic_94	Chr04:1470616|1529754	59139
502	Intergenic_95	Chr04:3096854|3140035	43182
	Intergenic_95	Chr04:3097076|3140948	43873
	Intergenic_95	Chr04:3097167|3140929	43763
	Intergenic_95	Chr04:3103133|3145653	42521
	Intergenic_95	Chr04:3104509|3147085	42577
	Intergenic_95	Chr04:3114415|3148842	34428
	Intergenic_95	Chr04:3115226|3149634	34409
503	Intergenic_96	Chr04:3879584|3961011	81428
	Intergenic_96	Chr04:3902824|3903369	546
	Intergenic_96	Chr04:3912162|3971202	59041
504	Intergenic_97	Chr04:5125321|5129800	4480
	Intergenic_97	Chr04:5125464|5129800	4337
505	Intergenic_98	Chr04:6314879|6340882	26004
	Intergenic_98	Chr04:6315644|6341742	26099
506	Intergenic_99	Chr04:21351152|21408324	57173
	Intergenic_99	Chr04:21368713|21428227	59515
507	Intergenic_100	Chr04:24365453|24384110	18658
	Intergenic_100	Chr04:24365911|24384618	18708
508	Intergenic_101	Chr04:27406446|27443885	37440
	Intergenic_101	Chr04:27427970|27447572	19603
509	Intergenic_102	Chr04:27665329|27670364	5036
	Intergenic_102	Chr04:27666193|27670745	4553
510	Intergenic_103	Chr04:27727858|27742891	15034
	Intergenic_103	Chr04:27728067|27743151	15085
	Intergenic_103	Chr04:27729213|27744432	15220
	Intergenic_103	Chr04:27729672|27744779	15108
	Intergenic_103	Chr04:27729690|27744905	15216
	Intergenic_103	Chr04:27729988|27745121	15134
511	Intergenic_104	Chr04:28665739|28670410	4672
	Intergenic_104	Chr04:28666103|28670859	4757
512	Intergenic_105	Chr04:31574795|31600563	25769
	Intergenic_105	Chr04:31574941|31600563	25623
513	Intergenic_106	Chr05:21334367|21370397	36031
	Intergenic_106	Chr05:21336906|21380732	43827
514	Intergenic_107	Chr05:23784154|23784352	199
	Intergenic_107	Chr05:23784193|23784352	160
515	Intergenic_108	Chr05:24824928|24877520	52593
	Intergenic_108	Chr05:24825575|24885274	59700
516	Intergenic_109	Chr05:27103211|27133332	30122
	Intergenic_109	Chr05:27105127|27134674	29548
	Intergenic_109	Chr05:27106403|27155010	48608
	Intergenic_109	Chr05:27106598|27155192	48595
517	Intergenic_110	Chr05:28686017|28695511	9495
	Intergenic_110	Chr05:28688708|28706739	18032
	Intergenic_110	Chr05:28697016|28725600	28585
	Intergenic_110	Chr05:28697340|28725816	28477
518	Intergenic_111	Chr05:30785309|30825342	40034
	Intergenic_111	Chr05:30786229|30826247	40019
	Intergenic_111	Chr05:30789677|30792254	2578
519	Intergenic_112	Chr05:31521856|31545369	23514
	Intergenic_112	Chr05:31523018|31551249	28232
	Intergenic_112	Chr05:31524103|31552326	28224
	Intergenic_112	Chr05:31525683|31554512	28830
520	Intergenic_113	Chr05:36214537|36268376	53840
	Intergenic_113	Chr05:36221551|36275677	54127
	Intergenic_113	Chr05:36223207|36277248	54042
521	Intergenic_114	Chr05:36516346|36572931	56586
	Intergenic_114	Chr05:36519799|36577616	57818
522	Intergenic_115	Chr05:36632601|36635872	3272
	Intergenic_115	Chr05:36632818|36636089	3272
	Intergenic_115	Chr05:36632937|36636208	3272
523	Intergenic_116	Chr05:36800518|36848995	48478
	Intergenic_116	Chr05:36802435|36850954	48520
524	Intergenic_117	Chr05:37698189|37714628	16440
	Intergenic_117	Chr05:37707486|37707751	266
525	Intergenic_118	Chr05:38438022|38454285	16264
	Intergenic_118	Chr05:38442947|38448002	5056
526	Intergenic_119	Chr05:40945895|40949206	3312
	Intergenic_119	Chr05:40945895|40949253	3359
527	Intergenic_120	Chr05:43813512|43817858	4347
	Intergenic_120	Chr05:43817298|43827066	9769
528	Intergenic_121	Chr05:44187780|44187935	156
	Intergenic_121	Chr05:44187783|44187935	153
	Intergenic_121	Chr05:44187867|44188207	341
529	Intergenic_122	Chr05:44489631|44519006	29376
	Intergenic_122	Chr05:44490588|44520085	29498
	Intergenic_122	Chr05:44494457|44587724	93268
	Intergenic_122	Chr05:44519121|44538220	19100
	Intergenic_122	Chr05:44521885|44541522	19638
	Intergenic_122	Chr05:44522308|44524879	2572
	Intergenic_122	Chr05:44523904|44543219	19316
	Intergenic_122	Chr05:44588141|44629725	41585
	Intergenic_122	Chr05:44588215|44630174	41960
530	Intergenic_123	Chr05:44612389|44627722	15334
	Intergenic_123	Chr05:44759845|44779383	19539
	Intergenic_123	Chr05:44772762|44823295	50534
	Intergenic_123	Chr05:44773909|44824297	50389
531	Intergenic_124	Chr05:45086935|45087371	437
	Intergenic_124	Chr05:45086935|45088041	1107
	Intergenic_124	Chr05:45087008|45088111	1104
532	Intergenic_125	Chr05:45610489|45626542	16054
	Intergenic_125	Chr05:45610620|45679387	68768
	Intergenic_125	Chr05:45612196|45632173	19978
533	Intergenic_126	Chr05:46079301|46090952	11652
	Intergenic_126	Chr05:46081865|46100074	18210
534	Intergenic_127	Chr05:46432214|46476607	44394
	Intergenic_127	Chr05:46433091|46477414	44324
	Intergenic_127	Chr05:46458117|46480123	22007
	Intergenic_127	Chr05:46458391|46480123	21733
	Intergenic_127	Chr05:46458957|46480667	21711
535	Intergenic_128	Chr05:46932191|46950601	18411
	Intergenic_128	Chr05:46935145|46953730	18586
	Intergenic_128	Chr05:46946511|46978131	31621
536	Intergenic_129	Chr05:47176006|47197129	21124
	Intergenic_129	Chr05:47176006|47197643	21638
537	Intergenic_130	Chr06:379011|408463	29453
	Intergenic_130	Chr06:380846|410393	29548
	Intergenic_130	Chr06:390644|432822	42179
538	Intergenic_131	Chr06:937893|963199	25307
	Intergenic_131	Chr06:945420|951132	5713
539	Intergenic_132	Chr06:1184145|1210797	26653
	Intergenic_132	Chr06:1184731|1211394	26664
540	Intergenic_133	Chr06:7947648|7948678	1031
	Intergenic_133	Chr06:7947648|7948925	1278
541	Intergenic_134	Chr06:24689499|24734731	45233
	Intergenic_134	Chr06:24689665|24734087	44423
	Intergenic_134	Chr06:24690653|24735063	44411
542	Intergenic_135	Chr06:25413260|25419081	5822
	Intergenic_135	Chr06:25416009|25427011	11003
	Intergenic_135	Chr06:25416953|25427929	10977
543	Intergenic_136	Chr06:27681741|27687066	5326
	Intergenic_136	Chr06:27682025|27687389	5365
544	Intergenic_137	Chr06:28764773|28772292	7520
	Intergenic_137	Chr06:28767123|28772292	5170
545	Intergenic_138	Chr06:30040402|30055168	14767
	Intergenic_138	Chr06:30045029|30058857	13829
546	Intergenic_139	Chr06:30197073|30207550	10478
	Intergenic_139	Chr06:30198149|30208594	10446
547	Intergenic_140	Chr06:30831371|30927553	96183
	Intergenic_140	Chr06:30840989|30862330	21342
	Intergenic_140	Chr06:30842814|30868782	25969
	Intergenic_140	Chr06:30849908|30875465	25558
548	Intergenic_141	Chr06:31892441|31920879	28439
	Intergenic_141	Chr06:31898988|31905285	6298
	Intergenic_141	Chr06:31900518|31923433	22916
	Intergenic_141	Chr06:31903863|31924610	20748
	Intergenic_141	Chr06:31903863|31941695	37833
	Intergenic_141	Chr06:31923999|31940969	16971
	Intergenic_141	Chr06:31937423|31940969	3547
	Intergenic_141	Chr06:31940547|31940969	423
549	Intergenic_142	Chr06:34040858|34043828	2971
	Intergenic_142	Chr06:34041047|34044344	3298
550	Intergenic_143	Chr06:34201396|34207656	6261
	Intergenic_143	Chr06:34202183|34208940	6758
551	Intergenic_144	Chr07:827206|857909	30704
	Intergenic_144	Chr07:839201|846124	6924
	Intergenic_144	Chr07:839408|845104	5697
	Intergenic_144	Chr07:847070|863564	16495
552	Intergenic_145	Chr07:1752266|1819061	66796
	Intergenic_145	Chr07:1752544|1770180	17637
	Intergenic_145	Chr07:1752871|1819617	66747
553	Intergenic_146	Chr07:1954984|2026273	71290
	Intergenic_146	Chr07:1954984|2042155	87172
554	Intergenic_147	Chr07:2559350|2607339	47990
	Intergenic_147	Chr07:2561696|2609678	47983
	Intergenic_147	Chr07:2566091|2614687	48597
	Intergenic_147	Chr07:2578290|2626530	48241
	Intergenic_147	Chr07:2580473|2628815	48343
	Intergenic_147	Chr07:2587171|2630814	43644
555	Intergenic_148	Chr07:2730698|2733974	3277
	Intergenic_148	Chr07:2732598|2735092	2495
556	Intergenic_149	Chr07:2900026|2998060	98035
	Intergenic_149	Chr07:2976075|3000523	24449
557	Intergenic_150	Chr07:5192242|5276163	83922
	Intergenic_150	Chr07:5196282|5282733	86452
558	Intergenic_151	Chr07:6901362|6915343	13982
	Intergenic_151	Chr07:6904637|6920785	16149
559	Intergenic_152	Chr07:10088517|10127935	39419
	Intergenic_152	Chr07:10095951|10128285	32335
	Intergenic_152	Chr07:10097240|10131180	33941
560	Intergenic_153	Chr07:11303520|11380551	77032
	Intergenic_153	Chr07:11303603|11380634	77032
561	Intergenic_154	Chr07:12121994|12212301	90308
	Intergenic_154	Chr07:12123735|12149615	25881
562	Intergenic_155	Chr07:23862206|23876666	14461
	Intergenic_155	Chr07:23863167|23877194	14028
563	Intergenic_156	Chr07:27662156|27699160	37005
	Intergenic_156	Chr07:27689476|27699160	9685
564	Intergenic_157	Chr07:29035457|29035667	211
	Intergenic_157	Chr07:29035499|29035711	213
565	Intergenic_158	Chr07:31240515|31292113	51599
	Intergenic_158	Chr07:31240515|31292222	51708
566	Intergenic_159	Chr07:31292223|31383524	91302
	Intergenic_159	Chr07:31302235|31380043	77809
	Intergenic_159	Chr07:31377291|31452582	75292
567	Intergenic_160	Chr07:31854244|31865478	11235
	Intergenic_160	Chr07:31854638|31865732	11095
568	Intergenic_161	Chr07:31926623|31937403	10781
	Intergenic_161	Chr07:31926744|31937129	10386
	Intergenic_161	Chr07:31927859|31938249	10391
569	Intergenic_162	Chr07:32605534|32623002	17469
	Intergenic_162	Chr07:32614355|32651635	37281
	Intergenic_162	Chr07:32615616|32683767	68152
	Intergenic_162	Chr07:32617026|32685656	68631
570	Intergenic_163	Chr07:33963516|33983308	19793
	Intergenic_163	Chr07:33980626|34001286	20661
	Intergenic_163	Chr07:33981114|34001785	20672
571	Intergenic_164	Chr08:1492154|1513431	21278
	Intergenic_164	Chr08:1504068|1504332	265
572	Intergenic_165	Chr08:2014334|2019877	5544
	Intergenic_165	Chr08:2014392|2019935	5544
573	Intergenic_166	Chr08:2337971|2342242	4272
	Intergenic_166	Chr08:2338072|2342343	4272
	Intergenic_166	Chr08:2339006|2342588	3583
574	Intergenic_167	Chr08:3049366|3061205	11840
	Intergenic_167	Chr08:3055512|3071558	16047
	Intergenic_167	Chr08:3055767|3071558	15792
575	Intergenic_168	Chr08:3080255|3116089	35835
	Intergenic_168	Chr08:3080255|3126833	46579
	Intergenic_168	Chr08:3080742|3127320	46579
	Intergenic_168	Chr08:3105511|3128692	23182
576	Intergenic_169	Chr08:3340013|3349116	9104
	Intergenic_169	Chr08:3342793|3351394	8602
	Intergenic_169	Chr08:3347780|3374841	27062
577	Intergenic_170	Chr08:3404239|3445356	41118
	Intergenic_170	Chr08:3404282|3445399	41118
	Intergenic_170	Chr08:3416555|3459483	42929
578	Intergenic_171	Chr08:4382658|4429858	47201
	Intergenic_171	Chr08:4416875|4429858	12984
579	Intergenic_172	Chr08:5038072|5045091	7020
	Intergenic_172	Chr08:5038438|5045452	7015
580	Intergenic_173	Chr08:5329788|5371649	41862
	Intergenic_173	Chr08:5335236|5350822	15587
581	Intergenic_174	Chr08:6911885|6938780	26896
	Intergenic_174	Chr08:6914340|6941861	27522
582	Intergenic_175	Chr08:26167275|26198783	31509
	Intergenic_175	Chr08:26167440|26198125	30686
	Intergenic_175	Chr08:26167642|26198114	30473
	Intergenic_175	Chr08:26167642|26198125	30484
	Intergenic_175	Chr08:26170041|26209930	39890
	Intergenic_175	Chr08:26170729|26210531	39803
	Intergenic_175	Chr08:26180616|26213262	32647
	Intergenic_175	Chr08:26197771|26211509	13739
	Intergenic_175	Chr08:26197771|26213960	16190
583	Intergenic_176	Chr08:26468049|26542478	74430
	Intergenic_176	Chr08:26468049|26543467	75419
	Intergenic_176	Chr08:26468315|26543609	75295
	Intergenic_176	Chr08:26468802|26544081	75280
	Intergenic_176	Chr08:26469489|26544892	75404
	Intergenic_176	Chr08:26470958|26545934	74977
	Intergenic_176	Chr08:26472736|26546625	73890
	Intergenic_176	Chr08:26544794|26643692	98899
	Intergenic_176	Chr08:26592659|26602131	9473
584	Intergenic_177	Chr08:29561102|29577073	15972
	Intergenic_177	Chr08:29561680|29577476	15797
	Intergenic_177	Chr08:29567434|29580760	13327
	Intergenic_177	Chr08:29567458|29580760	13303
	Intergenic_177	Chr08:29568480|29580760	12281
	Intergenic_177	Chr08:29568480|29581828	13349
585	Intergenic_178	Chr08:29829668|29874944	45277
	Intergenic_178	Chr08:29829794|29875349	45556
	Intergenic_178	Chr08:29830629|29875437	44809
586	Intergenic_179	Chr08:29875913|29902211	26299
	Intergenic_179	Chr08:29876243|29903527	27285
587	Intergenic_180	Chr08:29921153|29965406	44254
	Intergenic_180	Chr08:29924517|29968793	44277
	Intergenic_180	Chr08:29924761|29969670	44910
588	Intergenic_181	Chr08:30050070|30074528	24459
	Intergenic_181	Chr08:30056030|30081245	25216
589	Intergenic_182	Chr08:30492030|30545432	53403
	Intergenic_182	Chr08:30494943|30518352	23410
590	Intergenic_183	Chr09:1273483|1278959	5477
	Intergenic_183	Chr09:1274925|1282339	7415
	Intergenic_183	Chr09:1275340|1282761	7422
	Intergenic_183	Chr09:1276081|1283499	7419
591	Intergenic_184	Chr09:1460653|1499991	39339
	Intergenic_184	Chr09:1466594|1505720	39127
	Intergenic_184	Chr09:1467782|1506036	38255
	Intergenic_184	Chr09:1499216|1547968	48753
592	Intergenic_185	Chr09:1912234|1924683	12450
	Intergenic_185	Chr09:1912511|1924911	12401
	Intergenic_185	Chr09:1912511|1924914	12404
	Intergenic_185	Chr09:1913951|1926440	12490
	Intergenic_185	Chr09:1913951|1926480	12530
	Intergenic_185	Chr09:1914960|1927172	12213
	Intergenic_185	Chr09:1915197|1927829	12633
	Intergenic_185	Chr09:1917253|1929272	12020
	Intergenic_185	Chr09:1917306|1929272	11967
593	Intergenic_186	Chr09:2344795|2380643	35849
	Intergenic_186	Chr09:2345514|2382179	36666
	Intergenic_186	Chr09:2347007|2362409	15403
	Intergenic_186	Chr09:2347007|2383968	36962
	Intergenic_186	Chr09:2361541|2383099	21559
594	Intergenic_187	Chr09:2472408|2489506	17099
	Intergenic_187	Chr09:2477816|2500540	22725
	Intergenic_187	Chr09:2799396|2826754	27359
595	Intergenic_188	Chr09:3656979|3688774	31796
	Intergenic_188	Chr09:3681011|3688774	7764
	Intergenic_188	Chr09:3681799|3688951	7153
596	Intergenic_189	Chr09:3761024|3764866	3843
	Intergenic_189	Chr09:3762226|3762723	498
	Intergenic_189	Chr09:3762576|3765590	3015
597	Intergenic_190	Chr09:5191682|5226302	34621
	Intergenic_190	Chr09:5191682|5291345	99664
	Intergenic_190	Chr09:5192138|5227202	35065
	Intergenic_190	Chr09:5226777|5291345	64569
	Intergenic_190	Chr09:5227532|5293453	65922
598	Intergenic_191	Chr09:5822211|5890564	68354
	Intergenic_191	Chr09:5843415|5874211	30797
599	Intergenic_192	Chr09:6185331|6256316	70986
	Intergenic_192	Chr09:6185377|6221288	35912
	Intergenic_192	Chr09:6185377|6256316	70940
600	Intergenic_193	Chr09:6856545|6918750	62206
	Intergenic_193	Chr09:6857290|6919504	62215
	Intergenic_193	Chr09:6857871|6918727	60857
	Intergenic_193	Chr09:6870599|6923640	53042
	Intergenic_193	Chr09:6880119|6943658	63540
	Intergenic_193	Chr09:6882058|6924706	42649
	Intergenic_193	Chr09:6883048|6925595	42548
	Intergenic_193	Chr09:6883632|6926048	42417
	Intergenic_193	Chr09:6895715|6921077	25363
	Intergenic_193	Chr09:6896965|6922229	25265
	Intergenic_193	Chr09:6896965|6937600	40636
601	Intergenic_194	Chr09:9332041|9350168	18128
	Intergenic_194	Chr09:9333616|9353369	19754
	Intergenic_194	Chr09:9333616|9353563	19948
602	Intergenic_195	Chr09:10043945|10063637	19693
	Intergenic_195	Chr09:10046333|10111386	65054
603	Intergenic_196	Chr09:10150055|10168128	18074
	Intergenic_196	Chr09:10150055|10168207	18153
	Intergenic_196	Chr09:10154800|10171380	16581
	Intergenic_196	Chr09:10154950|10172493	17544
604	Intergenic_197	Chr09:10716986|10745746	28761
	Intergenic_197	Chr09:10718587|10742875	24289
	Intergenic_197	Chr09:10718587|10742880	24294
	Intergenic_197	Chr09:10718587|10742887	24301
	Intergenic_197	Chr09:10718587|10743013	24427
605	Intergenic_198	Chr09:10902824|10928033	25210
	Intergenic_198	Chr09:10903446|10928571	25126
606	Intergenic_199	Chr09:14856639|14886052	29414
	Intergenic_199	Chr09:14857346|14886977	29632
607	Intergenic_200	Chr09:20862298|20893042	30745
	Intergenic_200	Chr09:20862298|20893047	30750
	Intergenic_200	Chr09:20862298|20959225	96928
	Intergenic_200	Chr09:20863618|20894962	31345
	Intergenic_200	Chr09:20864134|20961709	97576
	Intergenic_200	Chr09:20865565|20896970	31406
	Intergenic_200	Chr09:20865853|20897180	31328
	Intergenic_200	Chr09:20865853|20963360	97508
	Intergenic_200	Chr09:20895095|20961140	66046
608	Intergenic_201	Chr09:29564380|29566822	2443
	Intergenic_201	Chr09:29564380|29566853	2474
609	Intergenic_202	Chr09:32764904|32800901	35998
	Intergenic_202	Chr09:32765659|32801276	35618
610	Intergenic_203	Chr09:33347180|33350984	3805
	Intergenic_203	Chr09:33347623|33351914	4292
611	Intergenic_204	Chr09:34144641|34152596	7956
	Intergenic_204	Chr09:34146149|34154118	7970
612	Intergenic_205	Chr09:35208009|35306837	98829
	Intergenic_205	Chr09:35216345|35314004	97660
613	Intergenic_206	Chr09:35361091|35383196	22106
	Intergenic_206	Chr09:35366072|35384063	17992
	Intergenic_206	Chr09:35366499|35388467	21969
	Intergenic_206	Chr09:35379477|35403511	24035
	Intergenic_206	Chr09:35380750|35404820	24071
614	Intergenic_207	Chr09:35884342|35893008	8667
	Intergenic_207	Chr09:35884627|35887519	2893
615	Intergenic_208	Chr10:33418|33695	278
	Intergenic_208	Chr10:33418|33729	312
616	Intergenic_209	Chr10:1873559|1904549	30991
	Intergenic_209	Chr10:1873559|1921462	47904
	Intergenic_209	Chr10:1903727|1920249	16523
617	Intergenic_210	Chr10:2752081|2802909	50829
	Intergenic_210	Chr10:2752170|2820922	68753
	Intergenic_210	Chr10:2802994|2820916	17923
	Intergenic_210	Chr10:2802999|2820922	17924
618	Intergenic_211	Chr10:4431691|4484434	52744
	Intergenic_211	Chr10:4440829|4491444	50616
	Intergenic_211	Chr10:4486624|4557651	71028
	Intergenic_211	Chr10:4503222|4566194	62973
619	Intergenic_212	Chr10:9837916|9874082	36167
	Intergenic_212	Chr10:9838277|9874739	36463
620	Intergenic_213	Chr10:10222476|10269248	46773
	Intergenic_213	Chr10:10223658|10269373	45716
621	Intergenic_214	Chr10:11671121|11732233	61113
	Intergenic_214	Chr10:11671121|11753534	82414
622	Intergenic_215	Chr10:13141458|13175171	33714
	Intergenic_215	Chr10:13145161|13178530	33370
623	Intergenic_216	Chr10:16041522|16098230	56709
	Intergenic_216	Chr10:16042765|16099844	57080
	Intergenic_216	Chr10:16043049|16100096	57048
624	Intergenic_217	Chr10:18309707|18315611	5905
	Intergenic_217	Chr10:18310414|18317234	6821
625	Intergenic_218	Chr10:21815849|21821847	5999
	Intergenic_218	Chr10:21817084|21856731	39648
	Intergenic_218	Chr10:21817382|21857062	39681
626	Intergenic_219	Chr10:24006423|24007244	822
	Intergenic_219	Chr10:24006423|24018906	12484
	Intergenic_219	Chr10:24006423|24018915	12493
	Intergenic_219	Chr10:24006423|24019163	12741
627	Intergenic_220	Chr10:27461609|27509417	47809
	Intergenic_220	Chr10:27462185|27509996	47812
628	Intergenic_221	Chr10:32930849|32935197	4349
	Intergenic_221	Chr10:32931191|32936312	5122
	Intergenic_221	Chr10:32931453|32936592	5140
629	Intergenic_222	Chr10:33586654|33685151	98498
	Intergenic_222	Chr10:33600888|33606401	5514
630	Intergenic_223	Chr10:33697730|33700806	3077
	Intergenic_223	Chr10:33698730|33701126	2397
631	Intergenic_224	Chr10:34718900|34755597	36698
	Intergenic_224	Chr10:34724231|34761064	36834
632	Intergenic_225	Chr10:39461723|39511397	49675
	Intergenic_225	Chr10:39462917|39512577	49661
633	Intergenic_226	Chr10:39796934|39828439	31506
	Intergenic_226	Chr10:39798367|39830008	31642
634	Intergenic_227	Chr10:40033021|40070665	37645
	Intergenic_227	Chr10:40033832|40071355	37524
	Intergenic_227	Chr10:40033832|40071359	37528
635	Intergenic_228	Chr10:41007006|41023740	16735
	Intergenic_228	Chr10:41007299|41025951	18653
	Intergenic_228	Chr10:41008169|41026822	18654
	Intergenic_228	Chr10:41008484|41027137	18654
636	Intergenic_229	Chr10:41137605|41192840	55236
	Intergenic_229	Chr10:41142354|41143071	718
637	Intergenic_230	Chr11:632756|686146	53391
	Intergenic_230	Chr11:632766|686146	53381
638	Intergenic_231	Chr11:703709|707643	3935
	Intergenic_231	Chr11:704563|708437	3875
639	Intergenic_232	Chr11:1658283|1668642	10360
	Intergenic_232	Chr11:1658348|1668707	10360
640	Intergenic_233	Chr11:1679472|1735533	56062
	Intergenic_233	Chr11:1679798|1735868	56071
	Intergenic_233	Chr11:1680016|1736078	56063
	Intergenic_233	Chr11:1681610|1737768	56159
	Intergenic_233	Chr11:1710609|1755310	44702
641	Intergenic_234	Chr11:2396504|2417608	21105
	Intergenic_234	Chr11:2396886|2418141	21256
642	Intergenic_235	Chr11:2667182|2760235	93054
	Intergenic_235	Chr11:2740245|2804024	63780
	Intergenic_235	Chr11:2743404|2760773	17370
643	Intergenic_236	Chr11:2983562|2996606	13045
	Intergenic_236	Chr11:2983811|2996984	13174
644	Intergenic_237	Chr11:5519297|5544846	25550
	Intergenic_237	Chr11:5521320|5554909	33590
	Intergenic_237	Chr11:5523169|5572050	48882
	Intergenic_237	Chr11:5530415|5554809	24395
	Intergenic_237	Chr11:5531286|5555482	24197
	Intergenic_237	Chr11:5532486|5556354	23869
	Intergenic_237	Chr11:5533286|5572050	38765
	Intergenic_237	Chr11:5557155|5572050	14896
645	Intergenic_238	Chr11:6025050|6077887	52838
	Intergenic_238	Chr11:6025077|6077914	52838
646	Intergenic_239	Chr11:6662820|6705282	42463
	Intergenic_239	Chr11:6667405|6674103	6699
647	Intergenic_240	Chr11:7058732|7067219	8488
	Intergenic_240	Chr11:7059257|7067660	8404
	Intergenic_240	Chr11:7060291|7068444	8154
648	Intergenic_241	Chr11:7073713|7091073	17361
	Intergenic_241	Chr11:7074027|7092939	18913
	Intergenic_241	Chr11:7074048|7092798	18751
	Intergenic_241	Chr11:7075112|7093866	18755
649	Intergenic_242	Chr11:9006404|9007090	687
	Intergenic_242	Chr11:9006404|9007140	737
650	Intergenic_243	Chr11:9654214|9662523	8310
	Intergenic_243	Chr11:9654214|9671120	16907
	Intergenic_243	Chr11:9662443|9670811	8369
651	Intergenic_244	Chr11:11355551|11371239	15689
	Intergenic_244	Chr11:11356065|11362838	6774
652	Intergenic_245	Chr11:36817999|36818338	340
	Intergenic_245	Chr11:36817999|36818887	889
653	Intergenic_246	Chr11:38309654|38354629	44976
	Intergenic_246	Chr11:38348101|38446755	98655
	Intergenic_246	Chr11:38354167|38451712	97546
654	Intergenic_247	Chr11:40419401|40445690	26290
	Intergenic_247	Chr11:40419659|40445929	26271
	Intergenic_247	Chr11:40419659|40462533	42875
	Intergenic_247	Chr11:40421089|40474906	53818
655	Intergenic_248	Chr11:42000498|42018317	17820
	Intergenic_248	Chr11:42001847|42031240	29394
	Intergenic_248	Chr11:42002188|42031693	29506
	Intergenic_248	Chr11:42003384|42032739	29356
	Intergenic_248	Chr11:42003626|42033102	29477
	Intergenic_248	Chr11:42016843|42028401	11559
	Intergenic_248	Chr11:42018175|42029868	11694
	Intergenic_248	Chr11:42022359|42031240	8882
656	Intergenic_249	Chr11:42579409|42599692	20284
	Intergenic_249	Chr11:42586413|42586587	175
	Intergenic_249	Chr11:42586500|42586673	174
657	Intergenic_250	Chr12:1002424|1015475	13052
	Intergenic_250	Chr12:1007203|1007638	436
	Intergenic_250	Chr12:1007292|1009241	1950
658	Intergenic_251	Chr12:5507391|5535379	27989
	Intergenic_251	Chr12:5509883|5537825	27943
659	Intergenic_252	Chr12:9278867|9321751	42885
	Intergenic_252	Chr12:9279780|9323054	43275
	Intergenic_252	Chr12:9279838|9323112	43275
660	Intergenic_253	Chr12:9877846|9891590	13745
	Intergenic_253	Chr12:9878365|9892109	13745
661	Intergenic_254	Chr12:20001547|20010176	8630
	Intergenic_254	Chr12:20001925|20010387	8463
	Intergenic_254	Chr12:20002355|20010688	8334
	Intergenic_254	Chr12:20002660|20011171	8512
	Intergenic_254	Chr12:20003634|20012252	8619
	Intergenic_254	Chr12:20003748|20012243	8496
	Intergenic_254	Chr12:20003748|20012270	8523
	Intergenic_254	Chr12:20004726|20013338	8613
	Intergenic_254	Chr12:20004949|20013706	8758
	Intergenic_254	Chr12:20005746|20014350	8605
	Intergenic_254	Chr12:20006018|20014804	8787
	Intergenic_254	Chr12:20007400|20016160	8761
662	Intergenic_255	Chr12:20174899|20227203	52305
	Intergenic_255	Chr12:20179518|20249215	69698
	Intergenic_255	Chr12:20180680|20246090	65411
	Intergenic_255	Chr12:20182056|20247188	65133
663	Intergenic_256	Chr12:23040803|23050042	9240
	Intergenic_256	Chr12:23041211|23050226	9016
	Intergenic_256	Chr12:23042037|23051140	9104
664	Intergenic_257	Chr12:25183258|25185343	2086
	Intergenic_257	Chr12:25183258|25185350	2093
665	Intergenic_258	Chr12:27461194|27476054	14861
	Intergenic_258	Chr12:27461572|27476305	14734
	Intergenic_258	Chr12:27466877|27476920	10044
	Intergenic_258	Chr12:27469468|27469642	175
666	Intergenic_259	Chr12:28480658|28483417	2760
	Intergenic_259	Chr12:28480658|28483687	3030
667	Intergenic_260	Chr12:28782942|28791501	8560
	Intergenic_260	Chr12:28784497|28792914	8418
	Intergenic_260	Chr12:28785968|28792514	6547
	Intergenic_260	Chr12:28787106|28793476	6371
	Intergenic_260	Chr12:28788071|28794688	6618
668	Intergenic_261	Chr12:29505586|29530653	25068
	Intergenic_261	Chr12:29506739|29539778	33040
669	Intergenic_262	Chr12:30089114|30135497	46384
	Intergenic_262	Chr12:30089669|30137620	47952
	Intergenic_262	Chr12:30090354|30138288	47935
	Intergenic_262	Chr12:30123587|30166066	42480
670	Intergenic_263	Chr12:30870686|30893494	22809
	Intergenic_263	Chr12:30883944|30891256	7313
	Intergenic_263	Chr12:30886224|30899028	12805
671	Intergenic_264	Chr12:31188464|31194285	5822
	Intergenic_264	Chr12:31188935|31194835	5901
	Intergenic_264	Chr12:31189560|31195468	5909
	Intergenic_264	Chr12:31189560|31210367	20808
	Intergenic_264	Chr12:31194452|31209184	14733
	Intergenic_264	Chr12:31195253|31210010	14758
	Intergenic_264	Chr12:31200687|31215937	15251
	Intergenic_264	Chr12:31200767|31215915	15149
672	Intergenic_265	Chr12:31220765|31230772	10008
	Intergenic_265	Chr12:31230508|31264265	33758
673	Intergenic_266	Chr12:31791360|31809654	18295
	Intergenic_266	Chr12:31807076|31859335	52260
	Intergenic_266	Chr12:31809320|31850193	40874
674	Intergenic_267	Chr12:32230349|32252920	22572
	Intergenic_267	Chr12:32230757|32280792	50036
	Intergenic_267	Chr12:32232527|32256815	24289
	Intergenic_267	Chr12:32232527|32283202	50676
	Intergenic_267	Chr12:32232527|32321691	89165
	Intergenic_267	Chr12:32254803|32272048	17246
	Intergenic_267	Chr12:32255816|32292805	36990
	Intergenic_267	Chr12:32257012|32274217	17206
	Intergenic_267	Chr12:32282933|32321195	38263
	Intergenic_267	Chr12:32310245|32316216	5972
675	Intergenic_268	Chr12:32410577|32414798	4222
	Intergenic_268	Chr12:32411146|32415370	4225
	Intergenic_268	Chr12:32411146|32418418	7273
676	Intergenic_269	Chr13:3016111|3032783	16673
	Intergenic_269	Chr13:3016934|3034523	17590
677	Intergenic_270	Chr13:6419458|6437069	17612
	Intergenic_270	Chr13:6420746|6439674	18929
	Intergenic_270	Chr13:6421369|6440506	19138
678	Intergenic_271	Chr13:7369704|7409384	39681
	Intergenic_271	Chr13:7370013|7409590	39578
	Intergenic_271	Chr13:7388702|7406236	17535
	Intergenic_271	Chr13:7388702|7441995	53294
679	Intergenic_272	Chr13:11065167|11152437	87271
	Intergenic_272	Chr13:11124018|11151106	27089
680	Intergenic_273	Chr13:36434782|36439934	5153
	Intergenic_273	Chr13:36439520|36439934	415
681	Intergenic_274	Chr14:845945|876939	30995
	Intergenic_274	Chr14:846429|876948	30520
682	Intergenic_275	Chr14:1666606|1678974	12369
	Intergenic_275	Chr14:1672166|1701196	29031
	Intergenic_275	Chr14:1672729|1701770	29042
	Intergenic_275	Chr14:1673085|1701985	28901
	Intergenic_275	Chr14:1674642|1703765	29124
	Intergenic_275	Chr14:1674797|1703770	28974
683	Intergenic_276	Chr14:2404473|2409730	5258
	Intergenic_276	Chr14:2405006|2410686	5681
	Intergenic_276	Chr14:2405842|2411258	5417
	Intergenic_276	Chr14:2406299|2411948	5650
684	Intergenic_277	Chr14:2942746|2947799	5054
	Intergenic_277	Chr14:2943089|2947923	4835
	Intergenic_277	Chr14:2943826|2948734	4909
685	Intergenic_278	Chr14:4618187|4621160	2974
	Intergenic_278	Chr14:4618937|4622693	3757
	Intergenic_278	Chr14:6415956|6422790	6835
686	Intergenic_279	Chr14:18174434|18202556	28123
	Intergenic_279	Chr14:18176402|18229441	53040
	Intergenic_279	Chr14:18203307|18228195	24889
687	Intergenic_280	Chr14:23599235|23607645	8411
	Intergenic_280	Chr14:23599781|23608211	8431
688	Intergenic_281	Chr14:24199260|24217331	18072
	Intergenic_281	Chr14:24199382|24217331	17950
689	Intergenic_282	Chr14:26157547|26177371	19825
	Intergenic_282	Chr14:26157582|26177531	19950
690	Intergenic_283	Chr14:27854297|27872104	17808
	Intergenic_283	Chr14:27855208|27873025	17818
	Intergenic_283	Chr14:27855304|27873025	17722
	Intergenic_283	Chr14:27855660|27891351	35692
	Intergenic_283	Chr14:27856916|27880586	23671
	Intergenic_283	Chr14:27856916|27892471	35556
	Intergenic_283	Chr14:27871973|27889166	17194
691	Intergenic_284	Chr14:29237927|29241205	3279
	Intergenic_284	Chr14:29239804|29242975	3172
692	Intergenic_285	Chr14:32128556|32150747	22192
	Intergenic_285	Chr14:32129761|32151707	21947
693	Intergenic_286	Chr15:2478967|2486030	7064
	Intergenic_286	Chr15:2481339|2493691	12353
694	Intergenic_287	Chr15:7356896|7357742	847
	Intergenic_287	Chr15:7356912|7357742	831
695	Intergenic_288	Chr15:8759005|8800520	41516
	Intergenic_288	Chr15:8779438|8804017	24580
[truncated: 159 more rows]
