# Supplementary material for: Expression Characteristics in Roots, Phloem, Leaves, Flowers and Fruits of Apple circRNA
Source: Genes (Basel). 2022 Apr 18;13(4):712. doi: 10.3390/genes13040712 (PMC9030095; doi:10.3390/genes13040712)
Supplement: Supplementary file 1 [file genes-13-00712-s001.zip › Table S7.xlsx]

## Sheet: Table S7-1
Table S7-1 Expression of circRNAs in all five tissues
New_ID	circRNA_ID	Flower	Phloem	Leaf	Root	Fruit	geneLength	gene_id
MD00G1064100_1	Chr00:12057683|12058611	144.009	192.415	314.01	188.284	924.764	789	MD00G1064100
MD00G1091800_1	Chr00:19234229|19235805	3604.5	253.57	2586.4	905.903	417.713	337	MD00G1091800
MD00G1091800_5	Chr00:19242721|19245366	1901.09	2141.98	1201.31	4120.93	2303.1	293	MD00G1091800
n/a_30	Chr01:14680136|14684684	62.4576	31.2819	30.0934	86.3641	26.5702	4548	n/a
n/a_33	Chr01:16266348|16285402	21.7927	27.3857	19.1546	9.74571	11.0819	19054	n/a
n/a_42	Chr01:18439726|18444400	3672.78	3317.62	1092.38	874.75	4643.63	4674	n/a
n/a_44	Chr01:18439786|18444715	57.6298	297.644	56.8884	121.252	265.133	4929	n/a
n/a_57	Chr01:20984385|21020443	73.7036	37.1267	124.216	9.55142	24.2851	36058	n/a
n/a_58	Chr01:20984999|21020967	51.0997	122.777	21.5627	129.373	24.1581	35968	n/a
n/a_60	Chr01:21162287|21214009	4.06863	28.9368	10.0824	9.90442	10.5322	51722	n/a
n/a_79	Chr01:27381080|27387550	88.3396	234.551	81.6317	57.4018	9.47047	6470	n/a
n/a_90	Chr01:27955024|27993092	63.2818	86.7911	64.6545	73.2853	71.5455	38068	n/a
n/a_92	Chr01:28303728|28375275	9.8151	26.2972	93.675	8.72638	3.66993	71547	n/a
MD01G1189200_2	Chr01:28822391|28823441	1534.1	892.219	1544.01	679.592	569.299	1050	MD01G1189200
MD01G1207000_1	Chr01:30242233|30242383	968.147	379.791	825.846	353.236	2345.43	150	MD01G1207000
n/a_235	Chr02:11646669|11658779	248.116	82.7369	41.7148	12.2672	436.38	12110	n/a
n/a_240	Chr02:12203646|12210619	1559.62	1434.01	1743.43	936.335	1913.04	6973	n/a
n/a_247	Chr02:14028023|14070675	32.2313	38.4839	49.7845	50.2788	5.7064	42652	n/a
n/a_248	Chr02:14042808|14070197	29.3829	34.9866	25.1069	62.174	13.639	27389	n/a
MD02G1022200_1	Chr02:1551852|1552012	1758.53	3344.25	1548.46	4275.64	930.742	160	MD02G1022200
n/a_139	Chr02:2693335|2705457	39.0321	124.741	43.5701	433.824	1627.15	12122	n/a
n/a_267	Chr02:29634543|29662708	87.1047	121.896	114.081	79.897	6.50015	28165	n/a
n/a_269	Chr02:30311907|30404274	8.15594	3.8545	5.48125	2.18196	10.0659	92367	n/a
n/a_278	Chr02:31366499|31401832	38.7913	11.2863	24.4477	21.7836	23.9919	35333	n/a
n/a_280	Chr02:31414323|31430998	262.916	93.7025	168.158	148.831	199.379	16675	n/a
n/a_292	Chr02:32605466|32611742	1893.45	520.879	1202.59	489.868	885.715	6276	n/a
n/a_294	Chr02:33748011|33757537	29.8191	8.11542	61.5947	71.2896	28.587	9526	n/a
n/a_295	Chr02:34096026|34129488	159.597	1.70249	47.6061	9.21674	3.64003	33462	n/a
n/a_314	Chr02:35806294|35811216	177.301	384.97	182.133	494.058	353.862	4922	n/a
MD02G1048800_2	Chr02:3843189|3843625	1655.62	1463.09	1953.87	2234.08	343.328	347	MD02G1048800
n/a_154	Chr02:4890119|4914867	37.4663	94.6641	31.1281	86.4487	21.2109	24748	n/a
MD02G1064300_1	Chr02:5193241|5194107	290.174	812.047	1954.79	333.242	187.319	318	MD02G1064300
n/a_158	Chr02:5335517|5339214	46.1007	186.893	50.5641	85.4297	64.4495	3697	n/a
n/a_120	Chr02:558666|561878	57.4566	107.436	391.112	233.829	56.1672	3212	n/a
n/a_168	Chr02:5668987|5710211	12.6965	24.0921	72.5351	13.7229	6.60586	41224	n/a
n/a_176	Chr02:5696206|5774819	1.8473	1.70806	3.56688	5.73345	2.72803	78613	n/a
n/a_182	Chr02:5772361|5824787	23.183	28.2136	16.7245	8.56156	6.91497	52426	n/a
Apple_newGene_21981_1	Chr02:5804250|5822696	549.978	2182.5	1184.1	2310	294.988	2431	Apple_newGene_21981
Apple_newGene_21981_7	Chr02:5806749|5827003	474.266	24.0608	217.14	879.928	722.246	3213	Apple_newGene_21981
Apple_newGene_21981_10	Chr02:5899979|5905006	5869.38	98822.2	5015.7	25533	604.373	1881	Apple_newGene_21981
n/a_184	Chr02:5999413|6019712	134.339	196.86	176.688	179.329	103.366	20299	n/a
n/a_191	Chr02:7241559|7271017	19.7192	153.29	37.1688	140.555	123.51	29458	n/a
n/a_195	Chr02:7677880|7747736	45.1661	34.0269	81.4477	26.1875	30.7571	69856	n/a
n/a_198	Chr02:7737972|7820261	17.6947	24.1651	6.13893	11.3862	14.2059	82289	n/a
n/a_220	Chr02:8532071|8542061	1058.84	74.6483	182.851	497.988	1940.05	9990	n/a
n/a_223	Chr02:8611472|8619662	82.1934	33.5954	22.2816	51.2061	24.4611	8190	n/a
n/a_225	Chr02:9831806|9842171	32.2539	296.977	95.0774	212.665	20.6907	10365	n/a
n/a_331	Chr03:1226434|1277176	6.54374	31.9814	7.90145	12.9796	3.0189	50742	n/a
n/a_334	Chr03:1237381|1257347	49.7061	53.5527	59.7605	62.4908	17.8771	19966	n/a
n/a_337	Chr03:1377367|1443660	2.78386	10.6121	10.2946	3.91786	0.898548	66293	n/a
n/a_351	Chr03:2629886|2635584	449.375	534.908	373.764	330.243	192.525	5698	n/a
n/a_432	Chr03:31052836|31064477	166.312	1156.29	145.161	524.516	61.8225	11641	n/a
n/a_447	Chr03:34887986|34890294	391.617	416.062	568.235	88.7635	198.791	2308	n/a
n/a_457	Chr03:36631963|36634436	18785.4	6047.05	3474.48	8486.73	17215	2473	n/a
n/a_458	Chr03:36631963|36643265	2575.02	904.128	961.641	1264.25	2018.96	11302	n/a
n/a_461	Chr03:36633860|36637817	1512.68	3939.69	431.445	3175.44	8183.81	3957	n/a
n/a_360	Chr03:3854591|3949531	21.8102	57.7507	15.404	53.7504	4.89264	94940	n/a
n/a_363	Chr03:3945110|3956427	56.8686	5.0339	66.8256	9.84509	37.5233	11317	n/a
n/a_373	Chr03:5086833|5103422	172.574	183.089	210.457	130.15	120.242	16589	n/a
n/a_378	Chr03:6261323|6265348	802.673	791.43	828.699	996.401	1278.25	4025	n/a
MD03G1092700_2	Chr03:7764353|7765011	327.799	539.308	1042.21	471	108.835	563	MD03G1092700
MD04G1086100_1	Chr04:12531917|12532277	742.358	526.926	597.556	487.777	4213.68	360	MD04G1086100
n/a_478	Chr04:1279980|1343477	463.478	385.361	434.247	374.862	624.485	63497	n/a
MD04G1100900_3	Chr04:18656471|18656699	1670.49	1789.57	814.98	1945.82	1329.23	228	MD04G1100900
n/a_528	Chr04:27665328|27670364	193.73	71.8822	55.6797	14.7494	321.106	5036	n/a
n/a_531	Chr04:27728066|27743151	75.3218	296.138	123.921	82.5427	34.9892	15085	n/a
n/a_537	Chr04:28665738|28670410	1471.43	1777.14	1179.91	707.861	1659.18	4672	n/a
n/a_486	Chr04:3037879|3041431	121.376	223.081	338.628	635.833	495.793	3552	n/a
MD04G1044600_2	Chr04:5205388|5205563	1318.22	812.971	1824.86	1517.84	1390.8	175	MD04G1044600
MD04G1047300_3	Chr04:5525065|5525497	374.993	4461.78	1656.23	1767	1434.73	303	MD04G1047300
n/a_501	Chr04:6208050|6229794	27.8744	13.0859	30.5841	2.69192	2.81797	21744	n/a
MD04G1055600_1	Chr04:6691047|6691554	438.135	444.55	2553.36	1493.59	313.118	389	MD04G1055600
MD04G1060900_1	Chr04:8021692|8022746	293.347	133.059	549.658	419.76	158.194	581	MD04G1060900
MD04G1060900_2	Chr04:8021692|8022993	338.04	198.913	573.456	901.387	1051.11	716	MD04G1060900
n/a_573	Chr05:24599379|24609274	285.389	598.579	108.066	670.8	223.248	9895	n/a
n/a_580	Chr05:27103210|27133332	4.59508	3.84972	10.7124	1.9432	1.97754	30122	n/a
n/a_583	Chr05:27106597|27155192	230.324	106.457	277.471	99.3824	149.58	48595	n/a
n/a_591	Chr05:28688707|28706739	113.835	98.092	77.1338	72.4256	63.9188	18032	n/a
MD05G1221200_1	Chr05:35405025|35408197	1046.31	1442.94	803.375	1032.7	1845.42	982	MD05G1221200
MD05G1025100_2	Chr05:4103761|4104135	388.294	108195	1249.57	188720	2547.95	374	MD05G1025100
n/a_654	Chr05:44612388|44627722	22.8982	11.1455	36.3546	21.653	5.29554	15334	n/a
MD05G1341400_11	Chr05:46186903|46187131	1861.04	2221.25	1486.83	837.705	7906.7	228	MD05G1341400
MD05G1341400_14	Chr05:46186931|46187159	1041.66	1888.32	2316.48	348.588	6479.31	228	MD05G1341400
n/a_678	Chr05:46571604|46605695	209.264	201.816	347.063	171.112	199.779	34091	n/a
n/a_685	Chr05:47176005|47197129	73.2664	1908.6	409.3	933.199	26.1061	21124	n/a
n/a_693	Chr06:1184730|1211394	19.4593	4.34898	49.5059	14.7216	707.854	26664	n/a
MD06G1015700_1	Chr06:1968337|1968981	1321.94	473.885	3651.42	3046.52	2184.63	644	MD06G1015700
n/a_727	Chr06:30040401|30055168	160.626	415.532	67.9674	109.004	78.8383	14767	n/a
n/a_746	Chr06:31940546|31940969	2365.05	1378.19	862.819	1341.57	5771.67	423	n/a
n/a_691	Chr06:945419|951132	228.718	358.983	1308.84	1827.59	1807.94	5713	n/a
n/a_807	Chr07:14961657|15025748	21.2477	12.0484	9.37509	8.74555	30.1303	64091	n/a
n/a_768	Chr07:2566090|2614687	21.3296	7.87064	56.5237	8.95579	19.4543	48597	n/a
n/a_771	Chr07:2587170|2630814	41.0323	2.17319	72.4228	10.2058	4.15567	43644	n/a
MD07G1035300_1	Chr07:2890430|2890959	3476.22	206.704	575.187	156.506	2028.55	374	MD07G1035300
n/a_819	Chr07:29035498|29035711	433.218	267.458	3071.71	248.758	431.507	213	n/a
MD07G1252500_3	Chr07:32032424|32033424	1197.17	181.429	595.336	1562.54	1086.33	314	MD07G1252500
n/a_791	Chr07:7544566|7600819	9.08184	27.6298	12.633	10.3285	15.5034	56253	n/a
MD08G1015800_1	Chr08:1236665|1236989	1660.31	7519.43	1086.37	10427.2	2933.77	324	MD08G1015800
n/a_857	Chr08:2134342|2148145	812.579	10950.1	633.938	4894.64	332.674	13803	n/a
MD08G1178700_1	Chr08:21981929|21982095	1139.1	3577.84	3246.51	2291.96	1386.27	166	MD08G1178700
n/a_860	Chr08:2339005|2342588	38.6305	384.29	34.5735	1124.02	16.625	3583	n/a
n/a_910	Chr08:26180615|26213262	373.446	653.503	224.627	584.777	202.685	32647	n/a
MD08G1234100_1	Chr08:30076245|30077752	369.493	726.602	262.919	616.032	1736.48	711	MD08G1234100
n/a_873	Chr08:3347779|3374841	13.6391	18.766	40.4315	13.3415	4.52841	27062	n/a
n/a_849	Chr08:891450|918925	29.4896	32.2751	101.922	37.7736	10.734	27475	n/a
n/a_958	Chr09:1912233|1924683	396.406	456.831	432.092	388.912	307.059	12450	n/a
n/a_966	Chr09:1917305|1929272	1175.71	2261.29	1106.13	1774.81	1538.78	11967	n/a
n/a_972	Chr09:2347006|2383968	9.22214	312.792	23.5209	442.932	15.9981	36962	n/a
n/a_1065	Chr09:33347622|33351914	198.549	723.3	1202.91	518.328	378.071	4292	n/a
n/a_1069	Chr09:34810600|34906342	8.69704	20.8612	11.9395	6.37733	1.27998	95742	n/a
n/a_1075	Chr09:35366498|35388467	178.18	216.85	298.741	276.787	158.423	21969	n/a
MD09G1292000_1	Chr09:37447035|37448351	272.477	136.615	437.617	483.312	698.788	417	MD09G1292000
MD09G1062600_1	Chr09:4252051|4252212	2271.17	480.17	566.728	329.102	1646.11	161	MD09G1062600
n/a_987	Chr09:5191681|5226302	6494.8	597.016	40.1748	2187.43	6.46075	34621	n/a
n/a_1017	Chr09:9333615|9353369	129.06	79.7889	51.5962	55.25	174.776	19754	n/a
n/a_1087	Chr10:1743380|1840716	47.6167	26.2228	53.5187	16.5705	13.921	97336	n/a
n/a_1125	Chr10:18309706|18315611	9803.35	8871.89	3762.52	6893.32	10241.6	5905	n/a
MD10G1123300_1	Chr10:20065036|20065186	2663.52	2417.49	11381.7	3344.2	612.74	150	MD10G1123300
n/a_1157	Chr10:33698729|33701126	10988.2	19248.3	10734.6	13385.3	9261.76	2397	n/a
n/a_1165	Chr10:36146121|36150260	881.051	883.516	471.711	500.818	381.093	4139	n/a
MD10G1314900_4	Chr10:39895044|39895272	2255.8	3012.03	1420.18	3433.57	5803.71	228	MD10G1314900
MD10G1314900_6	Chr10:39895472|39895700	1658.68	1338.52	2173.35	232.392	1586.75	228	MD10G1314900
n/a_1179	Chr10:40033831|40071359	22.6067	23.9622	47.9445	30.84	11.9007	37528	n/a
MD11G1160100_1	Chr11:15700454|15703149	319.165	479.86	691.262	2139.42	1481.32	712	MD11G1160100
MD11G1160100_2	Chr11:15702181|15703149	9505.45	8046.34	10573.5	45376.4	32719.2	528	MD11G1160100
n/a_1202	Chr11:1679797|1735868	179.152	139.944	249.889	140.677	75.9153	56071	n/a
n/a_1277	Chr11:26989382|27007892	660.534	249.295	327.805	176.566	546.171	18510	n/a
MD11G1194800_2	Chr11:27929442|27931318	469.418	271.751	319.084	314.47	1232.37	1267	MD11G1194800
n/a_1287	Chr11:35609859|35644194	27.6071	19.0675	10.6298	13.4504	2.67689	34335	n/a
n/a_1321	Chr11:42023804|42032739	36.1459	197.37	335.534	160.933	30.7765	8935	n/a
n/a_1222	Chr11:5389249|5406316	8.50894	41.5484	8.01926	34.3737	19.1962	17067	n/a
n/a_1237	Chr11:6025049|6077887	4.58073	23.2564	20.0271	28.5796	2.30521	52838	n/a
n/a_1194	Chr11:632755|686146	41.2292	47.1588	56.4573	21.1511	25.1852	53391	n/a
n/a_1246	Chr11:7074026|7092939	10.2379	123.431	6.54983	42.9581	16.1989	18913	n/a
n/a_1257	Chr11:8240565|8253211	131.297	135.622	209.997	872.34	52.9612	12646	n/a
n/a_1263	Chr11:9654213|9662523	3358.34	8651.49	137.249	5227.88	127.031	8310	n/a
MD12G1095800_3	Chr12:13257556|13261810	499.923	609.485	1666.4	639.282	479.786	1051	MD12G1095800
MD12G1120600_5	Chr12:19329966|19330194	1307.78	249.862	400.189	2621.72	1289.27	228	MD12G1120600
n/a_1361	Chr12:20002659|20011171	376.77	974.833	592.562	1368.4	152.664	8512	n/a
n/a_1364	Chr12:20003747|20012270	113.316	1010.85	1022.88	1566.8	104.244	8523	n/a
n/a_1367	Chr12:20005745|20014350	359.316	558.537	616.971	897.252	228.755	8605	n/a
n/a_1368	Chr12:20006017|20014804	155.025	251.67	476.595	551.875	133.146	8787	n/a
n/a_1369	Chr12:20007399|20016160	152.656	304.97	344.525	71.213	55.3796	8761	n/a
n/a_1386	Chr12:25183257|25185350	272.117	354.294	87.1889	1099.98	284.43	2093	n/a
n/a_1428	Chr12:31230507|31264265	9.46505	258.035	120.352	222.91	346.091	33758	n/a
n/a_1340	Chr12:3245635|3250425	157.518	175.519	403.111	233.816	62.5353	4790	n/a
MD13G1185100_1	Chr13:15745509|15745685	4624.13	5893.89	3574.11	14127.3	25428.3	176	MD13G1185100
MD13G1283100_3	Chr13:41733287|41735651	175.072	419.389	807.517	642.859	931.414	553	MD13G1283100
MD13G1075900_1	Chr13:5378816|5379151	2536.51	2367.64	2065.98	2993.47	751.507	335	MD13G1075900
n/a_1507	Chr14:2339757|2344141	380.194	332.93	449.075	218.532	186.035	4384	n/a
n/a_1510	Chr14:2405841|2411258	452.581	507.962	460.117	590.402	207.056	5417	n/a
MD14G1163600_1	Chr14:25765222|25766378	648.807	1006.01	3184.49	2539.8	3686.23	647	MD14G1163600
n/a_1495	Chr14:846428|876948	43.3087	17.5272	9.18752	13.832	4.87938	30520	n/a
MD15G1253900_4	Chr15:21425004|21425163	6596.36	16863.1	7033.13	1133.64	107471	159	MD15G1253900
MD15G1313400_1	Chr15:31698430|31706505	850.065	590.991	950.85	1919.08	1464.82	809	MD15G1313400
n/a_1638	Chr15:50689986|50695446	4821.39	3738.34	2968.7	2884.13	3077.63	5460	n/a
n/a_1649	Chr15:52261718|52273493	5529.48	1046.42	1309.97	678.453	60554.5	11775	n/a
MD15G1425400_1	Chr15:52632784|52634374	948.672	213.524	1153.91	1070.83	638.101	711	MD15G1425400
n/a_1581	Chr15:8042952|8049381	55.2162	13.2918	201.46	30.9872	9.53087	6429	n/a
n/a_1583	Chr15:8093488|8099686	1509.99	2249.12	1888.25	1327.65	1920.22	6198	n/a
n/a_1719	Chr16:14069762|14146112	203.825	171.813	186.456	158.289	139.684	76350	n/a
MD16G1193900_2	Chr16:17208500|17208808	913.524	376.497	592.488	4584.72	1284.81	308	MD16G1193900
n/a_1734	Chr16:18934366|18979195	827.696	751.802	786.395	616.13	296.627	44829	n/a
MD16G1247900_1	Chr16:27691466|27696605	2466.73	2772.3	4599.63	3053.8	2007.98	972	MD16G1247900
n/a_1687	Chr16:4437248|4444349	685.15	187.092	944.097	133.489	157.894	7101	n/a
n/a_1694	Chr16:5782987|5793303	337.831	460.972	529.6	323.632	32.2548	10316	n/a
n/a_1795	Chr17:10635463|10667592	25.6418	28.5301	2.8399	32.5406	9.53562	32129	n/a
n/a_1805	Chr17:14900486|14938412	2.55273	4.00293	4.81164	27.149	1.61562	37926	n/a
n/a_1759	Chr17:1815159|1877319	3.7112	1.24368	5.97886	4.10357	3.3952	62160	n/a
MD17G1027400_3	Chr17:1956366|1963280	795.995	487.333	47.2935	491.683	275.125	5929	MD17G1027400
MD17G1215200_4	Chr17:26226360|26226516	620.607	365.183	2674.79	1188.78	520.525	156	MD17G1215200
MD17G1037500_1	Chr17:2731751|2732210	449.695	750.765	326.852	826.015	161.673	379	MD17G1037500
MD17G1239800_1	Chr17:28914236|28914489	898.205	450.345	1700.55	462.713	1433.76	253	MD17G1239800
n/a_1832	Chr17:32635930|32639418	1028.99	552.272	1224.57	450.148	228.372	3488	n/a
MD17G1277500_2	Chr17:33761313|33761463	4707.37	632.311	825.846	706.472	1611.22	150	MD17G1277500

## Sheet: Table S7-2
Table S5 Expression of circRNAs in root only
New_ID	circRNA_ID	Flower	Phloem	Leaf	Root	Fruit	geneLength	gene_id
MD00G1007700_1	Chr00:1034016|1034174	0	0	0	470.113	0	158	MD00G1007700
MD00G1055800_1	Chr00:10468996|10469182	0	0	0	283.344	0	187	MD00G1055800
MD00G1009800_1	Chr00:1220059|1220436	0	0	0	197.024	0	377	MD00G1009800
MD00G1067900_1	Chr00:13259211|13259372	0	0	0	329.102	0	161	MD00G1067900
n/a_3	Chr00:1459128|1469309	0	0	0	5.20434	0	10181	n/a
MD00G1076300_1	Chr00:15352536|15352686	0	0	0	1756	0	150	MD00G1076300
MD00G1078900_2	Chr00:15879899|15882585	0	0	0	373.137	0	497	MD00G1078900
MD00G1085500_1	Chr00:17154095|17155294	0	0	0	380.406	0	503	MD00G1085500
MD00G1086100_1	Chr00:17512421|17512749	0	0	0	178.455	0	328	MD00G1086100
MD00G1089600_2	Chr00:18497829|18498206	0	0	0	250.142	0	234	MD00G1089600
MD00G1093300_1	Chr00:19608607|19608959	0	0	0	235.491	0	225	MD00G1093300
MD00G1096900_1	Chr00:20353945|20355563	0	0	0	55.5986	0	953	MD00G1096900
MD00G1016700_2	Chr00:2412708|2413737	0	0	0	113.657	0	1030	MD00G1016700
MD00G1114500_1	Chr00:24292829|24295657	0	0	0	70.5024	0	2412	MD00G1114500
n/a_6	Chr00:3199539|3206091	0	0	0	893.603	0	6552	n/a
MD00G1148100_8	Chr00:32478728|32484503	0	0	0	64.9282	0	1144	MD00G1148100
MD00G1149200_3	Chr00:32825681|32826066	0	0	0	190.662	0	307	MD00G1149200
MD00G1156500_1	Chr00:34435344|34435575	0	0	0	321.549	0	231	MD00G1156500
MD00G1171900_1	Chr00:39528458|39529091	0	0	0	122.454	0	478	MD00G1171900
MD00G1031100_1	Chr00:5176680|5181619	0	0	0	42.7622	0	1737	MD00G1031100
MD00G1034800_3	Chr00:6078467|6078810	0	0	0	154.476	0	343	MD00G1034800
n/a_13	Chr00:6450597|6450832	0	0	0	338.205	0	235	n/a
n/a_15	Chr00:6748205|6748381	0	0	0	422.033	0	176	n/a
MD01G1028100_1	Chr01:10457975|10458158	0	0	0	1014.73	0	183	MD01G1028100
MD01G1036200_4	Chr01:12169510|12170549	0	0	0	94.1126	0	563	MD01G1036200
MD01G1044900_1	Chr01:14444912|14445065	0	0	0	382.57	0	153	MD01G1044900
MD01G1046400_1	Chr01:14739857|14740019	0	0	0	1146.26	0	162	MD01G1046400
MD01G1051100_1	Chr01:15473843|15475490	0	0	0	208.88	0	889	MD01G1051100
n/a_32	Chr01:16171091|16204711	0	0	0	4.57335	0	33620	n/a
MD01G1056600_1	Chr01:16171820|16171970	0	0	0	529.854	0	150	MD01G1056600
n/a_35	Chr01:16598635|16615159	0	0	0	16.0749	0	16524	n/a
n/a_37	Chr01:16619804|16651910	0	0	0	10.4108	0	32106	n/a
n/a_40	Chr01:16726071|16816501	0	0	0	0.821386	0	90430	n/a
MD01G1071200_1	Chr01:17589287|17590101	0	0	0	361.264	0	220	MD01G1071200
MD01G1073000_1	Chr01:17815279|17815524	0	0	0	303.175	0	245	MD01G1073000
MD01G1073500_1	Chr01:17893304|17893459	0	0	0	339.65	0	156	MD01G1073500
MD01G1079300_1	Chr01:18655725|18656358	0	0	0	132.796	0	399	MD01G1079300
MD01G1079500_1	Chr01:18678818|18678995	0	0	0	446.506	0	178	MD01G1079500
n/a_45	Chr01:18702376|18721108	0	0	0	3.12477	0	18732	n/a
MD01G1083800_3	Chr01:19022217|19022372	0	0	0	341.841	0	155	MD01G1083800
MD01G1090900_1	Chr01:20584682|20584832	0	0	0	495.186	0	150	MD01G1090900
n/a_54	Chr01:20782434|20828279	0	0	0	4.05049	0	45845	n/a
n/a_55	Chr01:20845756|20853016	0	0	0	66.5022	0	7260	n/a
MD01G1106900_1	Chr01:21974178|21974438	0	0	0	225.128	0	260	MD01G1106900
MD01G1107300_1	Chr01:22026391|22026596	0	0	0	387.698	0	205	MD01G1107300
MD01G1110800_1	Chr01:22350227|22351088	0	0	0	61.5394	0	861	MD01G1110800
MD01G1113500_1	Chr01:22767115|22768910	0	0	0	138.705	0	382	MD01G1113500
MD01G1116700_3	Chr01:23037609|23039769	0	0	0	60.6935	0	873	MD01G1116700
MD01G1117200_1	Chr01:23099536|23100127	0	0	0	377.045	0	591	MD01G1117200
MD01G1117300_1	Chr01:23114263|23114563	0	0	0	444.012	0	179	MD01G1117300
MD01G1122800_1	Chr01:23589982|23590170	0	0	0	790.19	0	188	MD01G1122800
MD01G1137300_1	Chr01:24637787|24637961	0	0	0	336.398	0	174	MD01G1137300
MD01G1139500_1	Chr01:24919215|24919394	0	0	0	327.001	0	179	MD01G1139500
MD01G1144300_1	Chr01:25447595|25455514	0	0	0	6.69008	0	7920	MD01G1144300
MD01G1152500_1	Chr01:26109218|26110701	0	0	0	118.801	0	446	MD01G1152500
MD01G1153300_1	Chr01:26156887|26157701	0	0	0	195.278	0	814	MD01G1153300
n/a_88	Chr01:27864102|27921821	0	0	0	8.60257	0	57719	n/a
n/a_89	Chr01:27874126|27951720	0	0	0	1.91453	0	77594	n/a
MD01G1185700_1	Chr01:28465819|28466965	0	0	0	161.694	0	362	MD01G1185700
MD01G1186100_2	Chr01:28491715|28493015	0	0	0	124.379	0	426	MD01G1186100
MD01G1187900_1	Chr01:28626080|28626237	0	0	0	946.215	0	157	MD01G1187900
MD01G1189200_1	Chr01:28819791|28820118	0	0	0	179.001	0	327	MD01G1189200
MD01G1192300_2	Chr01:29167669|29167826	0	0	0	674.973	0	157	MD01G1192300
MD01G1197200_1	Chr01:29540435|29541542	0	0	0	134.823	0	393	MD01G1197200
MD01G1203100_1	Chr01:29913377|29914514	0	0	0	118.536	0	447	MD01G1203100
MD01G1205500_1	Chr01:30066570|30066971	0	0	0	132.133	0	401	MD01G1205500
MD01G1207000_2	Chr01:30242233|30242409	0	0	0	301.054	0	176	MD01G1207000
n/a_98	Chr01:30389588|30394776	0	0	0	16.9236	0	5188	n/a
n/a_100	Chr01:30564019|30584622	0	0	0	2.841	0	20603	n/a
MD01G1224900_1	Chr01:31582611|31583058	0	0	0	162.592	0	360	MD01G1224900
MD01G1226000_1	Chr01:31654050|31654332	0	0	0	375.783	0	282	MD01G1226000
MD01G1232300_1	Chr01:32088229|32088454	0	0	0	260.148	0	225	MD01G1232300
MD01G1233500_1	Chr01:32139095|32140449	0	0	0	66.2013	0	1122	MD01G1233500
n/a_108	Chr01:32251087|32267746	0	0	0	5.27041	0	16659	n/a
MD01G1015800_1	Chr01:7247374|7248854	0	0	0	178.183	0	657	MD01G1015800
MD01G1001600_1	Chr01:757267|757419	0	0	0	770.174	0	152	MD01G1001600
MD01G1001600_2	Chr01:757353|758169	0	0	0	83.4996	0	701	MD01G1001600
MD01G1022500_1	Chr01:8963465|8963618	0	0	0	382.57	0	153	MD01G1022500
n/a_227	Chr02:10135453|10140966	0	0	0	15.926	0	5513	n/a
MD02G1127400_1	Chr02:10315701|10317283	0	0	0	92.7941	0	571	MD02G1127400
MD02G1127400_2	Chr02:10317211|10319022	0	0	0	223.979	0	392	MD02G1127400
MD02G1132600_1	Chr02:10731262|10731756	0	0	0	107.258	0	494	MD02G1132600
n/a_237	Chr02:11882695|11883179	0	0	0	120.936	0	484	n/a
MD02G1149400_2	Chr02:12309825|12310215	0	0	0	169.825	0	312	MD02G1149400
MD02G1151400_1	Chr02:12497409|12498398	0	0	0	53.5747	0	989	MD02G1151400
MD02G1152800_1	Chr02:12650231|12650396	0	0	0	354.747	0	165	MD02G1152800
n/a_245	Chr02:12784862|12796838	0	0	0	19.9094	0	11976	n/a
MD02G1156700_1	Chr02:13028904|13029238	0	0	0	158.639	0	334	MD02G1156700
n/a_246	Chr02:13568868|13577665	0	0	0	1843.47	0	8797	n/a
n/a_126	Chr02:1397875|1409357	0	0	0	546.913	0	11482	n/a
n/a_127	Chr02:1397875|1409378	0	0	0	5.08851	0	11503	n/a
n/a_128	Chr02:1414349|1435794	0	0	0	77.7895	0	21445	n/a
n/a_129	Chr02:1414474|1439751	0	0	0	2.09619	0	25277	n/a
MD02G1166800_1	Chr02:14311393|14312436	0	0	0	86.4362	0	613	MD02G1166800
MD02G1174500_1	Chr02:15332314|15332827	0	0	0	188.817	0	310	MD02G1174500
n/a_133	Chr02:1534272|1548544	0	0	0	10.2532	0	14272	n/a
MD02G1176300_1	Chr02:15560847|15561090	0	0	0	240.877	0	243	MD02G1176300
MD02G1178100_1	Chr02:15733697|15733928	0	0	0	458.748	0	231	MD02G1178100
MD02G1182600_2	Chr02:16472261|16472441	0	0	0	412.655	0	180	MD02G1182600
MD02G1186000_1	Chr02:16899978|16900653	0	0	0	275.103	0	270	MD02G1186000
MD02G1186000_2	Chr02:16901249|16901470	0	0	0	264.856	0	221	MD02G1186000
MD02G1187200_1	Chr02:17064276|17064462	0	0	0	798.687	0	186	MD02G1187200
MD02G1189200_1	Chr02:17279385|17279683	0	0	0	623.358	0	170	MD02G1189200
n/a_256	Chr02:17425818|17426047	0	0	0	255.603	0	229	n/a
MD02G1199700_2	Chr02:19651469|19651962	0	0	0	166.621	0	318	MD02G1199700
n/a_137	Chr02:2240672|2253520	0	0	0	9.11164	0	12848	n/a
MD02G1211700_1	Chr02:22644053|22648645	0	0	0	88.4565	0	599	MD02G1211700
MD02G1032700_1	Chr02:2567735|2568228	0	0	0	219.499	0	400	MD02G1032700
MD02G1032900_1	Chr02:2582700|2583180	0	0	0	234.315	0	317	MD02G1032900
MD02G1032900_3	Chr02:2585703|2586000	0	0	0	386.864	0	192	MD02G1032900
MD02G1003700_1	Chr02:263445|264194	0	0	0	90.329	0	648	MD02G1003700
n/a_138	Chr02:2692557|2705027	0	0	0	7.04088	0	12470	n/a
n/a_261	Chr02:28091288|28190928	0	0	0	5.85439	0	99640	n/a
MD02G1241600_2	Chr02:29032105|29032441	0	0	0	498.155	0	235	MD02G1241600
MD02G1242600_2	Chr02:29295835|29295987	0	0	0	385.087	0	152	MD02G1242600
MD02G1244500_1	Chr02:29446812|29447010	0	0	0	375.141	0	198	MD02G1244500
n/a_266	Chr02:29632400|29660564	0	0	0	8.39212	0	28164	n/a
n/a_268	Chr02:30310246|30403956	0	0	0	6.40355	0	93710	n/a
n/a_274	Chr02:31360483|31404191	0	0	0	4.49676	0	43708	n/a
MD02G1261200_1	Chr02:31511225|31512762	0	0	0	203.009	0	261	MD02G1261200
MD02G1263600_1	Chr02:31773854|31777597	0	0	0	92.9636	0	799	MD02G1263600
n/a_282	Chr02:31783074|31800852	0	0	0	129.52	0	17778	n/a
MD02G1266200_1	Chr02:32031928|32032095	0	0	0	317.278	0	167	MD02G1266200
MD02G1282000_1	Chr02:33793694|33793887	0	0	0	384.86	0	193	MD02G1282000
n/a_301	Chr02:34303345|34373405	0	0	0	6.80658	0	70060	n/a
n/a_147	Chr02:3543276|3551083	0	0	0	122.755	0	7807	n/a
MD02G1300000_2	Chr02:35475824|35476213	0	0	0	185.914	0	285	MD02G1300000
MD02G1300300_1	Chr02:35505916|35506084	0	0	0	884.261	0	168	MD02G1300300
n/a_313	Chr02:35784787|35803237	0	0	0	5.74368	0	18450	n/a
MD02G1313900_1	Chr02:36937012|36939380	0	0	0	98.8736	0	2368	MD02G1313900
MD02G1313900_2	Chr02:36939411|36940831	0	0	0	113.401	0	655	MD02G1313900
MD02G1317800_2	Chr02:37225466|37225768	0	0	0	290.728	0	302	MD02G1317800
MD02G1319100_1	Chr02:37350630|37351778	0	0	0	181.217	0	323	MD02G1319100
MD02G1319100_2	Chr02:37352652|37354671	0	0	0	112.564	0	780	MD02G1319100
MD02G1319100_3	Chr02:37355898|37356430	0	0	0	180.658	0	324	MD02G1319100
MD02G1319100_4	Chr02:37355898|37357325	0	0	0	284.833	0	411	MD02G1319100
MD02G1319100_6	Chr02:37362821|37364614	0	0	0	68.2802	0	776	MD02G1319100
n/a_321	Chr02:37411521|37411702	0	0	0	292.737	0	181	n/a
Apple_newGene_21821_1	Chr02:4191325|4220194	0	0	0	7.92467	0	9373	Apple_newGene_21821
Apple_newGene_21821_4	Chr02:4369355|4391452	0	0	0	16.2344	0	6863	Apple_newGene_21821
MD02G1056800_1	Chr02:4602336|4602664	0	0	0	501.537	0	328	MD02G1056800
MD02G1007200_1	Chr02:469227|470164	0	0	0	114.098	0	651	MD02G1007200
MD02G1062600_1	Chr02:5019949|5021830	0	0	0	255.251	0	291	MD02G1062600
MD02G1008300_1	Chr02:516288|516456	0	0	0	315.389	0	168	MD02G1008300
n/a_118	Chr02:545875|548210	0	0	0	136.405	0	2335	n/a
n/a_119	Chr02:545895|548210	0	0	0	64.171	0	2315	n/a
MD02G1069600_1	Chr02:5668044|5668573	0	0	0	159.927	0	366	MD02G1069600
n/a_171	Chr02:5669954|5697317	0	0	0	3.2087	0	27363	n/a
n/a_181	Chr02:5747856|5781815	0	0	0	4.37456	0	33959	n/a
Apple_newGene_21981_8	Chr02:5867589|5867821	0	0	0	252.298	0	232	Apple_newGene_21981
Apple_newGene_21981_11	Chr02:5900303|5905219	0	0	0	98.5906	0	1881	Apple_newGene_21981
Apple_newGene_21981_13	Chr02:5909750|5909927	0	0	0	330.696	0	177	Apple_newGene_21981
MD02G1091900_1	Chr02:7299655|7300019	0	0	0	224.265	0	261	MD02G1091900
n/a_194	Chr02:7468239|7478700	0	0	0	14.2009	0	10461	n/a
MD02G1096700_1	Chr02:7638577|7638703	0	0	0	589.507	0	126	MD02G1096700
n/a_197	Chr02:7732432|7819288	0	0	0	15.6927	0	86856	n/a
n/a_201	Chr02:7766994|7845046	0	0	0	5.43078	0	78052	n/a
n/a_202	Chr02:7767574|7845629	0	0	0	0.678822	0	78055	n/a
n/a_206	Chr02:7832914|7861169	0	0	0	2.0716	0	28255	n/a
n/a_208	Chr02:8010385|8023151	0	0	0	4.15051	0	12766	n/a
MD02G1012900_1	Chr02:821945|824753	0	0	0	105.011	0	1061	MD02G1012900
n/a_215	Chr02:8488249|8546281	0	0	0	5.99277	0	58032	n/a
n/a_222	Chr02:8537581|8541163	0	0	0	88.7528	0	3582	n/a
MD02G1109700_1	Chr02:8865643|8865794	0	0	0	350.897	0	151	MD02G1109700
MD02G1113900_1	Chr02:9262003|9265897	0	0	0	52.7218	0	1005	MD02G1113900
MD02G1114500_1	Chr02:9312860|9313070	0	0	0	504.623	0	210	MD02G1114500
MD02G1119300_1	Chr02:9665708|9666283	0	0	0	415.719	0	352	MD02G1119300
MD03G1116800_1	Chr03:10490952|10493485	0	0	0	247.593	0	750	MD03G1116800
MD03G1117500_1	Chr03:10574660|10575192	0	0	0	370.463	0	237	MD03G1117500
MD03G1119200_2	Chr03:10906700|10910069	0	0	0	129.707	0	817	MD03G1119200
MD03G1015000_1	Chr03:1198236|1198808	0	0	0	229.542	0	255	MD03G1015000
n/a_328	Chr03:1222935|1254714	0	0	0	15.8549	0	31779	n/a
n/a_335	Chr03:1259550|1276955	0	0	0	17.0705	0	17405	n/a
MD03G1133300_1	Chr03:13281690|13282682	0	0	0	191.053	0	416	MD03G1133300
MD03G1134200_2	Chr03:13401889|13402324	0	0	0	669.931	0	435	MD03G1134200
MD03G1141100_2	Chr03:14861583|14861883	0	0	0	390.221	0	300	MD03G1141100
MD03G1143400_1	Chr03:15379445|15380210	0	0	0	76.514	0	765	MD03G1143400
n/a_399	Chr03:17272066|17272198	0	0	0	401.405	0	132	n/a
MD03G1154600_1	Chr03:17730467|17730663	0	0	0	298.639	0	196	MD03G1154600
MD03G1159100_2	Chr03:18890851|18891211	0	0	0	218.047	0	243	MD03G1159100
MD03G1159500_1	Chr03:18994908|18995156	0	0	0	854.604	0	248	MD03G1159500
MD03G1159900_1	Chr03:19096595|19097740	0	0	0	84.6954	0	877	MD03G1159900
n/a_341	Chr03:2064589|2107872	0	0	0	1.83624	0	43283	n/a
n/a_342	Chr03:2089800|2131827	0	0	0	1.89112	0	42027	n/a
MD03G1171800_1	Chr03:23370088|23370465	0	0	0	212.848	0	275	MD03G1171800
MD03G1172000_1	Chr03:23403370|23403917	0	0	0	851.392	0	275	MD03G1172000
n/a_346	Chr03:2354286|2361619	0	0	0	52.8073	0	7333	n/a
n/a_416	Chr03:24304851|24305030	0	0	0	490.502	0	179	n/a
n/a_420	Chr03:24869329|24913998	0	0	0	2.49428	0	44669	n/a
MD03G1030700_1	Chr03:2490805|2491959	0	0	0	134.709	0	590	MD03G1030700
MD03G1186700_2	Chr03:25513869|25514052	0	0	0	608.835	0	183	MD03G1186700
MD03G1187000_1	Chr03:25560755|25561764	0	0	0	314.454	0	337	MD03G1187000
MD03G1191400_1	Chr03:26286796|26287047	0	0	0	443.892	0	251	MD03G1191400
n/a_423	Chr03:26310297|26336750	0	0	0	40.9268	0	26453	n/a
n/a_424	Chr03:26310772|26336846	0	0	0	119.654	0	26074	n/a
MD03G1192300_1	Chr03:26398304|26399916	0	0	0	142.764	0	615	MD03G1192300
MD03G1197400_2	Chr03:26959910|26960791	0	0	0	170.189	0	467	MD03G1197400
n/a_425	Chr03:27301994|27302308	0	0	0	168.743	0	314	n/a
MD03G1036400_1	Chr03:2885346|2889327	0	0	0	85.3227	0	621	MD03G1036400
MD03G1209800_1	Chr03:28907351|28909240	0	0	0	79.4384	0	667	MD03G1209800
MD03G1219900_2	Chr03:30433996|30434545	0	0	0	137.08	0	427	MD03G1219900
n/a_433	Chr03:31297069|31315819	0	0	0	4.23883	0	18750	n/a
MD03G1240400_1	Chr03:32565540|32565717	0	0	0	330.696	0	177	MD03G1240400
n/a_436	Chr03:32579008|32589879	0	0	0	52.7307	0	10871	n/a
MD03G1246300_2	Chr03:33333289|33333421	0	0	0	443.433	0	132	MD03G1246300
MD03G1250300_1	Chr03:33840668|33841006	0	0	0	235.142	0	338	MD03G1250300
MD03G1258500_1	Chr03:34557944|34559344	0	0	0	202.771	0	433	MD03G1258500
n/a_358	Chr03:3462760|3477341	0	0	0	6.02152	0	14581	n/a
MD03G1266300_1	Chr03:35146744|35146908	0	0	0	679.371	0	164	MD03G1266300
n/a_449	Chr03:35754935|35767790	0	0	0	9.10668	0	12855	n/a
n/a_453	Chr03:36286431|36286650	0	0	0	534.55	0	219	n/a
MD03G1045600_1	Chr03:3658915|3659120	0	0	0	362.331	0	205	MD03G1045600
n/a_455	Chr03:36604088|36623687	0	0	0	28.4241	0	19599	n/a
n/a_459	Chr03:36632156|36643593	0	0	0	6.94921	0	11437	n/a
Apple_newGene_29122_1	Chr03:36919618|36919772	0	0	0	344.061	0	154	Apple_newGene_29122
n/a_361	Chr03:3889069|3923118	0	0	0	72.8064	0	34049	n/a
n/a_369	Chr03:4077189|4096439	0	0	0	21.2223	0	19250	n/a
MD03G1055400_1	Chr03:4426765|4426956	0	0	0	416.116	0	191	MD03G1055400
MD03G1066000_1	Chr03:5282121|5282310	0	0	0	393.005	0	189	MD03G1066000
Apple_newGene_25728_1	Chr03:5324396|5331908	0	0	0	132.775	0	7512	Apple_newGene_25728
MD03G1085100_1	Chr03:6868754|6868958	0	0	0	717.318	0	204	MD03G1085100
MD03G1090000_1	Chr03:7420859|7421059	0	0	0	264.927	0	200	MD03G1090000
MD03G1009900_1	Chr03:760864|761030	0	0	0	638.379	0	166	MD03G1009900
MD03G1094800_1	Chr03:8028883|8029220	0	0	0	314.454	0	337	MD03G1094800
n/a_386	Chr03:8046395|8069300	0	0	0	7.07608	0	22905	n/a
n/a_391	Chr03:9935877|9942783	0	0	0	8.4757	0	6906	n/a
MD04G1079000_1	Chr04:10844518|10847430	0	0	0	229.542	0	510	MD04G1079000
n/a_476	Chr04:1102601|1106717	0	0	0	117.3	0	4116	n/a
MD04G1083900_2	Chr04:12183062|12183264	0	0	0	289.768	0	202	MD04G1083900
n/a_479	Chr04:1458387|1511433	0	0	0	2.49714	0	53046	n/a
n/a_480	Chr04:1459522|1512534	0	0	0	1.10415	0	53012	n/a
n/a_481	Chr04:1459581|1512313	0	0	0	8.03845	0	52732	n/a
MD04G1100900_2	Chr04:18656418|18656646	0	0	0	256.725	0	228	MD04G1100900
n/a_514	Chr04:18657627|18657877	0	0	0	211.942	0	250	n/a
MD04G1113900_1	Chr04:19998460|19998655	0	0	0	450.255	0	195	MD04G1113900
MD04G1121200_1	Chr04:20747690|20748433	0	0	0	130.312	0	570	MD04G1121200
MD04G1125600_2	Chr04:21212974|21213243	0	0	0	196.972	0	269	MD04G1125600
MD04G1129600_1	Chr04:21592221|21592465	0	0	0	304.418	0	244	MD04G1129600
MD04G1001900_1	Chr04:232009|232393	0	0	0	137.624	0	385	MD04G1001900
n/a_520	Chr04:23346450|23346636	0	0	0	284.868	0	186	n/a
n/a_524	Chr04:24365910|24384618	0	0	0	11.9111	0	18708	n/a
MD04G1171600_1	Chr04:26320618|26320786	0	0	0	696.824	0	168	MD04G1171600
MD04G1174500_1	Chr04:26596091|26597272	0	0	0	80.3004	0	925	MD04G1174500
MD04G1177500_1	Chr04:26877099|26877256	0	0	0	337.487	0	157	MD04G1177500
n/a_534	Chr04:27729689|27744905	0	0	0	7.32235	0	15216	n/a
n/a_485	Chr04:2788156|2878235	0	0	0	3.23516	0	90079	n/a
MD04G1189400_1	Chr04:27978247|27980420	0	0	0	219.757	0	1014	MD04G1189400
MD04G1194100_5	Chr04:28355269|28356328	0	0	0	99.5967	0	798	MD04G1194100
MD04G1194200_2	Chr04:28362868|28363620	0	0	0	141.385	0	414	MD04G1194200
MD04G1196800_1	Chr04:28501167|28501964	0	0	0	373.505	0	612	MD04G1196800
MD04G1199800_1	Chr04:28667836|28668127	0	0	0	300.684	0	292	MD04G1199800
n/a_540	Chr04:28827128|28827369	0	0	0	989.354	0	241	n/a
MD04G1205000_3	Chr04:29113452|29115556	0	0	0	85.4915	0	1027	MD04G1205000
MD04G1206600_2	Chr04:29230272|29230431	0	0	0	333.242	0	159	MD04G1206600
MD04G1002300_3	Chr04:292792|297720	0	0	0	232.435	0	1323	MD04G1002300
MD04G1210800_1	Chr04:29521575|29521725	0	0	0	529.854	0	150	MD04G1210800
MD04G1214700_1	Chr04:29789064|29789202	0	0	0	1076.49	0	138	MD04G1214700
MD04G1216300_1	Chr04:29896495|29896727	0	0	0	227.405	0	233	MD04G1216300
MD04G1217700_1	Chr04:30031651|30031959	0	0	0	241.162	0	308	MD04G1217700
n/a_545	Chr04:30081587|30088050	0	0	0	8.19827	0	6463	n/a
MD04G1221700_1	Chr04:30291225|30292477	0	0	0	72.1872	0	734	MD04G1221700
MD04G1222500_1	Chr04:30330078|30330279	0	0	0	369.542	0	201	MD04G1222500
n/a_546	Chr04:30416798|30434249	0	0	0	850.145	0	17451	n/a
n/a_490	Chr04:3103132|3145653	0	0	0	141.099	0	42521	n/a
MD04G1231200_1	Chr04:31085651|31085901	0	0	0	297.112	0	250	MD04G1231200
MD04G1026800_1	Chr04:3112897|3113070	0	0	0	459.411	0	173	MD04G1026800
MD04G1232200_3	Chr04:31141108|31143407	0	0	0	55.3084	0	958	MD04G1232200
n/a_548	Chr04:31258501|31258804	0	0	0	174.869	0	303	n/a
MD04G1241500_1	Chr04:31860506|31860660	0	0	0	482.324	0	154	MD04G1241500
MD04G1241500_2	Chr04:31865562|31865776	0	0	0	347.093	0	214	MD04G1241500
MD04G1244100_1	Chr04:32040341|32041305	0	0	0	141.385	0	621	MD04G1244100
MD04G1028800_2	Chr04:3256708|3258319	0	0	0	173.175	0	507	MD04G1028800
MD04G1031100_2	Chr04:3471612|3471774	0	0	0	327.07	0	162	MD04G1031100
n/a_496	Chr04:3902823|3903369	0	0	0	145.564	0	546	n/a
n/a_497	Chr04:3912161|3971202	0	0	0	0.897434	0	59041	n/a
MD04G1037200_1	Chr04:4152383|4155793	0	0	0	145.172	0	1008	MD04G1037200
MD04G1037300_1	Chr04:4159250|4168018	0	0	0	352.028	0	633	MD04G1037300
MD04G1039100_1	Chr04:4278617|4279379	0	0	0	104.302	0	762	MD04G1039100
MD04G1039200_2	Chr04:4300557|4300712	0	0	0	755.267	0	155	MD04G1039200
MD04G1040400_2	Chr04:4730373|4730865	0	0	0	140.545	0	377	MD04G1040400
MD04G1040900_1	Chr04:4779148|4780018	0	0	0	313.012	0	187	MD04G1040900
MD04G1041000_1	Chr04:4787817|4792442	0	0	0	89.3182	0	983	MD04G1041000
MD04G1003600_1	Chr04:514671|514888	0	0	0	488.345	0	217	MD04G1003600
MD04G1003600_2	Chr04:515489|517354	0	0	0	229.374	0	231	MD04G1003600
MD04G1003600_3	Chr04:518330|518970	0	0	0	1250.47	0	297	MD04G1003600
MD04G1045900_1	Chr04:5325292|5325469	0	0	0	330.696	0	177	MD04G1045900
MD04G1046500_1	Chr04:5407188|5407984	0	0	0	654.242	0	203	MD04G1046500
MD04G1047300_1	Chr04:5518290|5518772	0	0	0	170.155	0	344	MD04G1047300
MD04G1047300_2	Chr04:5525065|5525275	0	0	0	836.188	0	210	MD04G1047300
MD04G1048800_1	Chr04:5711515|5718876	0	0	0	226.457	0	820	MD04G1048800
n/a_503	Chr04:6314878|6340882	0	0	0	10.1292	0	26004	n/a
MD04G1005500_1	Chr04:649831|650076	0	0	0	346.31	0	153	MD04G1005500
n/a_506	Chr04:6535011|6587962	0	0	0	1.10542	0	52951	n/a
MD04G1005500_2	Chr04:654684|657365	0	0	0	116.324	0	911	MD04G1005500
MD04G1055600_2	Chr04:6695187|6698583	0	0	0	218.816	0	535	MD04G1055600
MD04G1057100_1	Chr04:6992607|6992765	0	0	0	940.227	0	158	MD04G1057100
MD04G1057200_1	Chr04:7002865|7003801	0	0	0	121.248	0	437	MD04G1057200
MD04G1057200_3	Chr04:7042430|7043079	0	0	0	194.247	0	452	MD04G1057200
MD04G1065500_1	Chr04:8771739|8771941	0	0	0	367.712	0	202	MD04G1065500
MD04G1008000_2	Chr04:941568|941782	0	0	0	867.732	0	214	MD04G1008000
MD04G1069700_1	Chr04:9547102|9547548	0	0	0	459.925	0	323	MD04G1069700
n/a_474	Chr04:984025|984657	0	0	0	117.528	0	632	n/a
MD05G1059300_1	Chr05:10351688|10352717	0	0	0	147.182	0	540	MD05G1059300
MD05G1067500_2	Chr05:12704697|12706178	0	0	0	87.7989	0	846	MD05G1067500
MD05G1070400_1	Chr05:13607791|13608992	0	0	0	235.057	0	316	MD05G1070400
MD05G1087100_1	Chr05:18552223|18553167	0	0	0	89.0916	0	657	MD05G1087100
MD05G1008600_4	Chr05:1858634|1858800	0	0	0	352.61	0	166	MD05G1008600
MD05G1089900_1	Chr05:19019171|19019344	0	0	0	306.274	0	173	MD05G1089900
MD05G1009600_1	Chr05:2012446|2016364	0	0	0	60.635	0	1225	MD05G1009600
MD05G1113900_1	Chr05:23265490|23266785	0	0	0	540.243	0	609	MD05G1113900
MD05G1121800_1	Chr05:24419815|24420219	0	0	0	348.478	0	404	MD05G1121800
MD05G1122100_1	Chr05:24472524|24473624	0	0	0	103.285	0	513	MD05G1122100
n/a_575	Chr05:24825574|24885274	0	0	0	1.47068	0	59700	n/a
MD05G1128200_1	Chr05:25213138|25213801	0	0	0	201.842	0	368	MD05G1128200
MD05G1128400_2	Chr05:25236193|25236544	0	0	0	166.761	0	351	MD05G1128400
n/a_587	Chr05:28446011|28446194	0	0	0	405.89	0	183	n/a
MD05G1156300_1	Chr05:28625794|28626213	0	0	0	252.914	0	419	MD05G1156300
MD05G1159000_1	Chr05:28779588|28781437	0	0	0	104.611	0	1013	MD05G1159000
MD05G1163400_1	Chr05:29236119|29236486	0	0	0	228.645	0	256	MD05G1163400
MD05G1165800_1	Chr05:29494507|29495627	0	0	0	91.6012	0	639	MD05G1165800
MD05G1166200_1	Chr05:29567273|29567438	0	0	0	532.12	0	165	MD05G1166200
MD05G1174400_1	Chr05:30255692|30256040	0	0	0	213.442	0	348	MD05G1174400
MD05G1179700_1	Chr05:30747986|30748163	0	0	0	330.696	0	177	MD05G1179700
MD05G1185500_2	Chr05:31416119|31416274	0	0	0	476.14	0	156	MD05G1185500
n/a_601	Chr05:31521855|31545369	0	0	0	230.969	0	23514	n/a
n/a_603	Chr05:31524102|31552326	0	0	0	344.264	0	28224	n/a
n/a_604	Chr05:31525682|31554512	0	0	0	109.352	0	28830	n/a
MD05G1189200_2	Chr05:31710486|31711343	0	0	0	211.311	0	277	MD05G1189200
MD05G1191900_1	Chr05:32019058|32019221	0	0	0	455.693	0	163	MD05G1191900
MD05G1192500_1	Chr05:32059545|32060339	0	0	0	136.441	0	429	MD05G1192500
MD05G1196400_1	Chr05:32377047|32377251	0	0	0	519.465	0	204	MD05G1196400
MD05G1196500_1	Chr05:32381960|32383773	0	0	0	520.24	0	710	MD05G1196500
MD05G1199600_1	Chr05:32725007|32725566	0	0	0	104.711	0	559	MD05G1199600
MD05G1204900_1	Chr05:33447369|33447727	0	0	0	163.501	0	358	MD05G1204900
MD05G1209200_2	Chr05:34090632|34090792	0	0	0	914.581	0	160	MD05G1209200
MD05G1210000_1	Chr05:34147090|34147437	0	0	0	229.044	0	347	MD05G1210000
MD05G1213200_1	Chr05:34443371|34448027	0	0	0	76.1825	0	975	MD05G1213200
MD05G1214900_1	Chr05:34588373|34589648	0	0	0	78.1484	0	749	MD05G1214900
MD05G1223500_1	Chr05:35628811|35629983	0	0	0	86.8613	0	610	MD05G1223500
MD05G1021200_1	Chr05:3583374|3588106	0	0	0	73.6932	0	719	MD05G1021200
MD05G1021200_2	Chr05:3587710|3588106	0	0	0	372.033	0	236	MD05G1021200
n/a_613	Chr05:36460138|36473167	0	0	0	6.10009	0	13029	n/a
n/a_615	Chr05:36519798|36577616	0	0	0	5.78108	0	57818	n/a
MD05G1235200_1	Chr05:36722754|36723970	0	0	0	111.528	0	666	MD05G1235200
MD05G1235200_2	Chr05:36723667|36723970	0	0	0	246.444	0	215	MD05G1235200
MD05G1239900_1	Chr05:37082033|37082613	0	0	0	706.164	0	373	MD05G1239900
MD05G1240000_1	Chr05:37090626|37090815	0	0	0	393.005	0	189	MD05G1240000
MD05G1240000_3	Chr05:37090800|37090991	0	0	0	777.779	0	191	MD05G1240000
n/a_625	Chr05:37707485|37707751	0	0	0	199.193	0	266	n/a
n/a_626	Chr05:37749614|37759038	0	0	0	7.88178	0	9424	n/a
n/a_630	Chr05:39580153|39637517	0	0	0	1.29485	0	57364	n/a
MD05G1264200_1	Chr05:39944002|39944167	0	0	0	450.169	0	165	MD05G1264200
n/a_632	Chr05:39947590|39967655	0	0	0	7.29295	0	20065	n/a
n/a_634	Chr05:40369925|40391495	0	0	0	4.07046	0	21570	n/a
MD05G1269300_1	Chr05:40451445|40451640	0	0	0	271.72	0	195	MD05G1269300
MD05G1271700_1	Chr05:40706561|40708062	0	0	0	126.971	0	585	MD05G1271700
MD05G1271700_2	Chr05:40706822|40708062	0	0	0	119.877	0	442	MD05G1271700
MD05G1025100_1	Chr05:4103761|4104125	0	0	0	422.407	0	364	MD05G1025100
MD05G1282900_2	Chr05:41650911|41653126	0	0	0	26.4258	0	2215	MD05G1282900
MD05G1026300_2	Chr05:4218775|4218955	0	0	0	825.31	0	180	MD05G1026300
n/a_638	Chr05:43145048|43156766	0	0	0	15.3822	0	11718	n/a
MD05G1300100_1	Chr05:43345965|43346166	0	0	0	369.542	0	201	MD05G1300100
n/a_640	Chr05:43813511|43817858	0	0	0	12.189	0	4347	n/a
MD05G1310200_1	Chr05:44092469|44095265	0	0	0	53.8246	0	1380	MD05G1310200
MD05G1310400_1	Chr05:44108965|44109199	0	0	0	226.433	0	234	MD05G1310400
MD05G1311400_1	Chr05:44144032|44144213	0	0	0	292.737	0	181	MD05G1311400
MD05G1312800_1	Chr05:44347611|44347893	0	0	0	375.783	0	282	MD05G1312800
n/a_649	Chr05:44521884|44541522	0	0	0	9.17857	0	19638	n/a
n/a_652	Chr05:44588140|44629725	0	0	0	2.54829	0	41585	n/a
n/a_656	Chr05:44759189|44759371	0	0	0	321.611	0	182	n/a
MD05G1325800_1	Chr05:45181592|45182088	0	0	0	160.238	0	496	MD05G1325800
MD05G1325800_2	Chr05:45182803|45183020	0	0	0	342.294	0	217	MD05G1325800
n/a_664	Chr05:45610488|45626542	0	0	0	6.94013	0	16054	n/a
n/a_666	Chr05:45612195|45632173	0	0	0	3.71798	0	19978	n/a
n/a_669	Chr05:46014039|46018150	0	0	0	28.4764	0	4111	n/a
MD05G1341400_16	Chr05:46187159|46187334	0	0	0	1138.38	0	175	MD05G1341400
MD05G1357700_1	Chr05:47332693|47333106	0	0	0	609.536	0	327	MD05G1357700
MD05G1360300_2	Chr05:47491246|47491397	0	0	0	581.456	0	151	MD05G1360300
MD05G1360300_3	Chr05:47491998|47492173	0	0	0	1061.11	0	175	MD05G1360300
MD05G1363200_2	Chr05:47803203|47803362	0	0	0	467.157	0	159	MD05G1363200
n/a_558	Chr05:5162751|5208834	0	0	0	66.8909	0	46083	n/a
MD05G1033400_1	Chr05:5390577|5391462	0	0	0	97.7591	0	542	MD05G1033400
MD05G1039700_1	Chr05:6755296|6756199	0	0	0	407.225	0	456	MD05G1039700
MD05G1044300_1	Chr05:7592525|7592956	0	0	0	394.237	0	336	MD05G1044300
Apple_newGene_33413_1	Chr05:7861066|7861253	0	0	0	397.208	0	187	Apple_newGene_33413
MD05G1055300_1	Chr05:9465479|9465689	0	0	0	278.729	0	210	MD05G1055300
MD05G1055800_1	Chr05:9804506|9804746	0	0	0	243.888	0	240	MD05G1055800
MD06G1062800_1	Chr06:10771521|10771837	0	0	0	348.412	0	168	MD06G1062800
MD06G1011200_2	Chr06:1340917|1341983	0	0	0	109.818	0	1066	MD06G1011200
MD06G1071100_1	Chr06:17208739|17208934	0	0	0	298.639	0	196	MD06G1071100
MD06G1077900_1	Chr06:19287168|19287644	0	0	0	241.162	0	308	MD06G1077900
MD06G1001600_2	Chr06:193439|193730	0	0	0	182.08	0	291	MD06G1001600
MD06G1082000_1	Chr06:20133987|20134507	0	0	0	295.275	0	431	MD06G1082000
MD06G1085100_2	Chr06:20899273|20900111	0	0	0	363.56	0	322	MD06G1085100
MD06G1087600_1	Chr06:21423055|21423206	0	0	0	737.86	0	151	MD06G1087600
MD06G1087800_1	Chr06:21460793|21461712	0	0	0	226.873	0	258	MD06G1087800
MD06G1092500_1	Chr06:22196658|22196885	0	0	0	327.215	0	227	MD06G1092500
MD06G1002100_1	Chr06:233584|234697	0	0	0	391.128	0	759	MD06G1002100
MD06G1101400_1	Chr06:23786697|23787244	0	0	0	280.346	0	378	MD06G1101400
MD06G1002300_1	Chr06:242541|242695	0	0	0	344.061	0	154	MD06G1002300
MD06G1002300_2	Chr06:245688|246005	0	0	0	249.931	0	318	MD06G1002300
MD06G1122100_1	Chr06:26333279|26333607	0	0	0	436.094	0	243	MD06G1122100
MD06G1122400_1	Chr06:26397051|26398761	0	0	0	136.76	0	856	MD06G1122400
n/a_695	Chr06:2710112|2710784	0	0	0	118.271	0	672	n/a
MD06G1137600_1	Chr06:28279328|28279487	0	0	0	365.832	0	160	MD06G1137600
MD06G1137600_2	Chr06:28279691|28279877	0	0	0	427.302	0	186	MD06G1137600
MD06G1147600_1	Chr06:28969801|28969966	0	0	0	481.686	0	165	MD06G1147600
MD06G1023400_1	Chr06:2904102|2906257	0	0	0	204.973	0	517	MD06G1023400
n/a_728	Chr06:30045028|30058857	0	0	0	48.3405	0	13829	n/a
MD06G1159200_1	Chr06:30076873|30077937	0	0	0	69.8101	0	1064	MD06G1159200
MD06G1161300_1	Chr06:30226627|30226931	0	0	0	174.294	0	304	MD06G1161300
MD06G1161400_1	Chr06:30245865|30246612	0	0	0	78.3577	0	747	MD06G1161400
MD06G1173400_1	Chr06:31327969|31328148	0	0	0	1244.88	0	179	MD06G1173400
n/a_735	Chr06:31448926|31451341	0	0	0	30.7569	0	2415	n/a
n/a_742	Chr06:31903862|31924610	0	0	0	3.58	0	20748	n/a
n/a_744	Chr06:31923998|31940969	0	0	0	3.12212	0	16971	n/a
MD06G1203100_1	Chr06:33753496|33753751	0	0	0	229.542	0	255	MD06G1203100
MD06G1203900_1	Chr06:33854566|33855074	0	0	0	126.156	0	420	MD06G1203900
MD06G1209900_1	Chr06:34303015|34303365	0	0	0	151.387	0	350	MD06G1209900
MD06G1210000_1	Chr06:34306732|34306900	0	0	0	442.13	0	168	MD06G1210000
MD06G1211900_1	Chr06:34460302|34461175	0	0	0	278.729	0	210	MD06G1211900
MD06G1216300_2	Chr06:34847133|34847284	0	0	0	348.588	0	152	MD06G1216300
MD06G1029200_1	Chr06:3489542|3489825	0	0	0	262.466	0	283	MD06G1029200
MD06G1217700_2	Chr06:34977178|34978422	0	0	0	128.605	0	412	MD06G1217700
MD06G1217700_3	Chr06:34979282|34979548	0	0	0	219.225	0	267	MD06G1217700
MD06G1224200_1	Chr06:35472240|35473302	0	0	0	189.002	0	393	MD06G1224200
MD06G1226900_1	Chr06:35767812|35768069	0	0	0	309.253	0	257	MD06G1226900
MD06G1227100_1	Chr06:35776573|35781434	0	0	0	43.2181	0	1839	MD06G1227100
MD06G1230400_1	Chr06:35998425|35998599	0	0	0	426.884	0	174	MD06G1230400
n/a_751	Chr06:36310598|36310864	0	0	0	330.074	0	266	n/a
MD06G1237000_3	Chr06:36827889|36828391	0	0	0	130.506	0	406	MD06G1237000
MD06G1237800_1	Chr06:36891144|36891658	0	0	0	500.215	0	414	MD06G1237800
MD06G1031700_1	Chr06:3831436|3832004	0	0	0	270.697	0	568	MD06G1031700
n/a_689	Chr06:390643|432822	0	0	0	2.0816	0	42179	n/a
MD06G1034700_2	Chr06:4317323|4318378	0	0	0	95.956	0	610	MD06G1034700
n/a_701	Chr06:4857569|4943612	0	0	0	1.2316	0	86043	n/a
MD06G1038400_1	Chr06:4921534|4921768	0	0	0	679.3	0	234	MD06G1038400
MD06G1038500_1	Chr06:4937651|4943612	0	0	0	122.571	0	606	MD06G1038500
MD06G1040000_1	Chr06:5183863|5185890	0	0	0	80.1595	0	661	MD06G1040000
MD06G1043800_3	Chr06:5855075|5865079	0	0	0	88.0198	0	665	MD06G1043800
MD06G1043800_6	Chr06:5898929|5899791	0	0	0	245.209	0	519	MD06G1043800
MD06G1043800_7	Chr06:5898929|5900447	0	0	0	109.879	0	1014	MD06G1043800
MD06G1043800_8	Chr06:5900234|5900616	0	0	0	550.124	0	266	MD06G1043800
MD06G1048300_1	Chr06:6539574|6540350	0	0	0	68.2802	0	776	MD06G1048300
MD06G1052800_1	Chr06:7663340|7663549	0	0	0	280.063	0	209	MD06G1052800
MD06G1055600_2	Chr06:8317274|8318994	0	0	0	119.455	0	980	MD06G1055600
MD06G1057900_2	Chr06:8960122|8960962	0	0	0	115.437	0	459	MD06G1057900
MD06G1059400_1	Chr06:9133888|9134052	0	0	0	452.914	0	164	MD06G1059400
n/a_794	Chr07:10095950|10128285	0	0	0	5.74284	0	32335	n/a
MD07G1094900_1	Chr07:10196436|10197309	0	0	0	74.6597	0	784	MD07G1094900
MD07G1098900_1	Chr07:10898024|10899306	0	0	0	138.751	0	803	MD07G1098900
MD07G1012400_1	Chr07:1120611|1121619	0	0	0	272.882	0	429	MD07G1012400
MD07G1102400_1	Chr07:11480941|11481222	0	0	0	263.397	0	282	MD07G1102400
n/a_801	Chr07:11884798|11946915	0	0	0	1.41346	0	62117	n/a
MD07G1111000_1	Chr07:12768123|12769140	0	0	0	428.815	0	273	MD07G1111000
MD07G1112500_1	Chr07:13147594|13147775	0	0	0	485.082	0	181	MD07G1112500
MD07G1118000_1	Chr07:14510674|14510995	0	0	0	231.395	0	321	MD07G1118000
MD07G1119200_1	Chr07:14877072|14878271	0	0	0	141.727	0	413	MD07G1119200
MD07G1121600_1	Chr07:15561767|15562039	0	0	0	194.799	0	272	MD07G1121600
MD07G1020000_1	Chr07:1696966|1697604	0	0	0	99.5967	0	532	MD07G1020000
MD07G1124600_2	Chr07:17460990|17462235	0	0	0	111.784	0	474	MD07G1124600
n/a_761	Chr07:1752543|1770180	0	0	0	24.8908	0	17637	n/a
MD07G1124900_1	Chr07:17534199|17534936	0	0	0	198.959	0	560	MD07G1124900
n/a_808	Chr07:17559624|17559993	0	0	0	215.388	0	369	n/a
MD07G1126000_1	Chr07:17784321|17784549	0	0	0	256.725	0	228	MD07G1126000
MD07G1136900_2	Chr07:19972576|19972732	0	0	0	476.14	0	156	MD07G1136900
n/a_810	Chr07:21323178|21323386	0	0	0	636.844	0	208	n/a
MD07G1175100_1	Chr07:25368982|25369262	0	0	0	209.047	0	280	MD07G1175100
n/a_767	Chr07:2561695|2609678	0	0	0	1.10425	0	47983	n/a
MD07G1201400_1	Chr07:27956470|27956651	0	0	0	410.375	0	181	MD07G1201400
MD07G1204900_1	Chr07:28221908|28222158	0	0	0	234.133	0	250	MD07G1204900
MD07G1214100_1	Chr07:29152623|29152811	0	0	0	309.699	0	189	MD07G1214100
MD07G1216500_1	Chr07:29410202|29410506	0	0	0	339.65	0	156	MD07G1216500
n/a_820	Chr07:30052024|30057581	0	0	0	139.28	0	5557	n/a
MD07G1223900_2	Chr07:30075092|30075930	0	0	0	92.6319	0	572	MD07G1223900
MD07G1226000_1	Chr07:30200367|30201505	0	0	0	148.211	0	715	MD07G1226000
n/a_776	Chr07:3029562|3029722	0	0	0	365.832	0	160	n/a
MD07G1245100_1	Chr07:31480717|31480927	0	0	0	252.312	0	210	MD07G1245100
n/a_828	Chr07:31854243|31865478	0	0	0	19.8339	0	11235	n/a
n/a_831	Chr07:31926622|31937403	0	0	0	27.0309	0	10781	n/a
MD07G1251900_1	Chr07:31994633|31994911	0	0	0	315.827	0	278	MD07G1251900
MD07G1252300_3	Chr07:32022489|32023631	0	0	0	171.147	0	434	MD07G1252300
MD07G1257600_1	Chr07:32386443|32386619	0	0	0	997.725	0	176	MD07G1257600
MD07G1264300_1	Chr07:33316295|33316552	0	0	0	227.756	0	257	MD07G1264300
MD07G1267200_1	Chr07:33517490|33517646	0	0	0	339.65	0	156	MD07G1267200
n/a_838	Chr07:33735322|33748604	0	0	0	6.61043	0	13282	n/a
n/a_842	Chr07:33981113|34001785	0	0	0	25.1522	0	20672	n/a
MD07G1279200_1	Chr07:34368250|34368424	0	0	0	504.596	0	174	MD07G1279200
MD07G1042200_1	Chr07:3539111|3539268	0	0	0	470.113	0	158	MD07G1042200
MD07G1042300_1	Chr07:3545346|3547204	0	0	0	381.641	0	348	MD07G1042300
MD07G1301800_1	Chr07:36037838|36038105	0	0	0	396.895	0	267	MD07G1301800
MD07G1304800_2	Chr07:36205022|36206644	0	0	0	349.452	0	335	MD07G1304800
MD07G1309200_1	Chr07:36456023|36456418	0	0	0	221.717	0	264	MD07G1309200
MD07G1310800_1	Chr07:36557008|36557200	0	0	0	1160.59	0	192	MD07G1310800
MD07G1311000_1	Chr07:36598049|36598233	0	0	0	431.946	0	184	MD07G1311000
n/a_781	Chr07:3877989|3888007	0	0	0	7.41444	0	10018	n/a
MD07G1045900_2	Chr07:3912097|3912250	0	0	0	346.31	0	153	MD07G1045900
MD07G1048000_1	Chr07:4113507|4113657	0	0	0	495.186	0	150	MD07G1048000
MD07G1048900_1	Chr07:4188452|4188643	0	0	0	388.89	0	191	MD07G1048900
MD07G1053000_1	Chr07:4875871|4876041	0	0	0	655.393	0	170	MD07G1053000
MD07G1059600_1	Chr07:5536874|5537294	0	0	0	126.156	0	420	MD07G1059600
MD07G1059600_2	Chr07:5536934|5537294	0	0	0	206.327	0	360	MD07G1059600
MD07G1059900_2	Chr07:5580311|5581032	0	0	0	183.341	0	289	MD07G1059900
MD07G1005500_1	Chr07:563581|564611	0	0	0	56.8283	0	1030	MD07G1005500
MD07G1062300_1	Chr07:5859463|5860554	0	0	0	135.167	0	784	MD07G1062300
n/a_789	Chr07:6904636|6920785	0	0	0	11.4988	0	16149	n/a
MD07G1073200_1	Chr07:6967260|6967513	0	0	0	209.429	0	253	MD07G1073200
MD07G1080300_1	Chr07:7779850|7780004	0	0	0	344.061	0	154	MD07G1080300
n/a_755	Chr07:839200|846124	0	0	0	15.3049	0	6924	n/a
MD07G1083500_1	Chr07:8412597|8412787	0	0	0	586.94	0	190	MD07G1083500
n/a_757	Chr07:847069|863564	0	0	0	14.4549	0	16495	n/a
n/a_758	Chr07:885928|890311	0	0	0	40.0638	0	4383	n/a
MD07G1010700_1	Chr07:976817|976975	0	0	0	370.463	0	158	MD07G1010700
MD07G1010700_2	Chr07:976865|977129	0	0	0	221.717	0	264	MD07G1010700
MD08G1113400_1	Chr08:10059901|10060074	0	0	0	612.548	0	173	MD08G1113400
MD08G1123100_1	Chr08:11379271|11379475	0	0	0	728.215	0	204	MD08G1123100
MD08G1125900_1	Chr08:11829392|11829666	0	0	0	213.625	0	274	MD08G1125900
MD08G1128700_1	Chr08:12101617|12102937	0	0	0	129.785	0	451	MD08G1128700
MD08G1128800_1	Chr08:12110672|12110971	0	0	0	265.813	0	299	MD08G1128800
MD08G1128800_2	Chr08:12110691|12110941	0	0	0	351.199	0	250	MD08G1128800
n/a_894	Chr08:12178469|12178718	0	0	0	319.189	0	249	n/a
MD08G1130200_1	Chr08:12258197|12258385	0	0	0	395.095	0	188	MD08G1130200
MD08G1132100_1	Chr08:12467145|12467381	0	0	0	314.737	0	236	MD08G1132100
MD08G1135800_1	Chr08:12915784|12915991	0	0	0	282.769	0	207	MD08G1135800
MD08G1001300_1	Chr08:136706|137511	0	0	0	72.712	0	805	MD08G1001300
n/a_895	Chr08:13967830|13968423	0	0	0	89.3515	0	593	n/a
n/a_850	Chr08:1434066|1464936	0	0	0	2.40615	0	30870	n/a
MD08G1153000_1	Chr08:16583029|16583187	0	0	0	335.351	0	158	MD08G1153000
MD08G1159200_1	Chr08:18013880|18014989	0	0	0	227.731	0	349	MD08G1159200
n/a_855	Chr08:2014391|2019935	0	0	0	33.4947	0	5544	n/a
MD08G1173000_1	Chr08:20811879|20812454	0	0	0	92.1486	0	575	MD08G1173000
MD08G1173300_1	Chr08:20913175|20913706	0	0	0	99.7842	0	531	MD08G1173300
MD08G1173600_1	Chr08:21110529|21110704	0	0	0	636.668	0	175	MD08G1173600
n/a_898	Chr08:21202982|21203132	0	0	0	390.221	0	150	n/a
MD08G1174700_1	Chr08:21216015|21216165	0	0	0	780.443	0	150	MD08G1174700
n/a_899	Chr08:21634690|21634864	0	0	0	456.771	0	174	n/a
MD08G1179500_1	Chr08:22109277|22111448	0	0	0	384.86	0	386	MD08G1179500
MD08G1179600_1	Chr08:22120618|22120785	0	0	0	350.498	0	167	MD08G1179600
n/a_900	Chr08:22180645|22180867	0	0	0	238.673	0	222	n/a
MD08G1180200_1	Chr08:22181628|22181843	0	0	0	492.888	0	215	MD08G1180200
MD08G1032400_1	Chr08:2311603|2311789	0	0	0	595.812	0	187	MD08G1032400
MD08G1186900_1	Chr08:23542518|23543149	0	0	0	120.421	0	440	MD08G1186900
MD08G1187400_1	Chr08:23593134|23593329	0	0	0	380.912	0	195	MD08G1187400
n/a_902	Chr08:24848402|24848564	0	0	0	458.506	0	162	n/a
MD08G1194100_1	Chr08:24962875|24963732	0	0	0	305.67	0	243	MD08G1194100
MD08G1200900_1	Chr08:26049447|26049652	0	0	0	284.142	0	206	MD08G1200900
n/a_911	Chr08:26197770|26211509	0	0	0	13.8944	0	13739	n/a
MD08G1002600_1	Chr08:276995|277145	0	0	0	353.236	0	150	MD08G1002600
n/a_861	Chr08:2781213|2782139	0	0	0	80.2137	0	926	n/a
n/a_862	Chr08:2782436|2782685	0	0	0	425.586	0	249	n/a
MD08G1218200_1	Chr08:28069782|28070167	0	0	0	176.618	0	300	MD08G1218200
MD08G1220400_1	Chr08:28323399|28324126	0	0	0	291.529	0	727	MD08G1220400
MD08G1222700_1	Chr08:28545813|28550263	0	0	0	184.16	0	605	MD08G1222700
n/a_926	Chr08:28557722|28578022	0	0	0	4.32511	0	20300	n/a
MD08G1039200_1	Chr08:2870302|2871593	0	0	0	88.0156	0	1204	MD08G1039200
MD08G1041400_1	Chr08:3054936|3055745	0	0	0	137.722	0	809	MD08G1041400
MD08G1240100_1	Chr08:30638115|30638871	0	0	0	199.772	0	293	MD08G1240100
MD08G1041700_1	Chr08:3073167|3073858	0	0	0	335.351	0	316	MD08G1041700
MD08G1244100_1	Chr08:30930547|30930700	0	0	0	485.476	0	153	MD08G1244100
MD08G1244900_1	Chr08:30974584|30979658	0	0	0	190.946	0	778	MD08G1244900
MD08G1247700_1	Chr08:31132889|31133047	0	0	0	470.113	0	158	MD08G1247700
n/a_948	Chr08:31208387|31208854	0	0	0	113.459	0	467	n/a
MD08G1248000_1	Chr08:31208602|31208948	0	0	0	262.304	0	202	MD08G1248000
MD08G1248300_1	Chr08:31238591|31241394	0	0	0	331.633	0	353	MD08G1248300
MD08G1248400_1	Chr08:31243032|31244497	0	0	0	145.298	0	547	MD08G1248400
MD08G1249500_2	Chr08:31375776|31375961	0	0	0	632.791	0	185	MD08G1249500
MD08G1043100_2	Chr08:3255368|3255534	0	0	0	1342.37	0	83	MD08G1043100
n/a_880	Chr08:4416874|4429858	0	0	0	9.80155	0	12984	n/a
MD08G1059200_1	Chr08:4721552|4721708	0	0	0	339.65	0	156	MD08G1059200
MD08G1005300_1	Chr08:475520|476950	0	0	0	174.726	0	335	MD08G1005300
n/a_881	Chr08:4962335|4987358	0	0	0	19.0572	0	25023	n/a
n/a_883	Chr08:5038437|5045452	0	0	0	18.1416	0	7015	n/a
MD08G1066700_1	Chr08:5338993|5339194	0	0	0	395.414	0	201	MD08G1066700
MD08G1074600_1	Chr08:6025585|6026467	0	0	0	425.928	0	311	MD08G1074600
MD08G1009300_2	Chr08:691486|693211	0	0	0	152.835	0	486	MD08G1009300
MD08G1091800_1	Chr08:7664088|7664323	0	0	0	316.076	0	235	MD08G1091800
n/a_889	Chr08:7751216|7770967	0	0	0	26.672	0	19751	n/a
n/a_891	Chr08:8404472|8405572	0	0	0	48.1686	0	1100	n/a
n/a_1027	Chr09:10716985|10745746	0	0	0	2.7634	0	28761	n/a
MD09G1140500_1	Chr09:10927954|10928571	0	0	0	180.578	0	617	MD09G1140500
MD09G1145000_2	Chr09:11269817|11270477	0	0	0	343.028	0	371	MD09G1145000
MD09G1148300_1	Chr09:11668276|11668449	0	0	0	338.342	0	173	MD09G1148300
MD09G1151300_1	Chr09:11939015|11939163	0	0	0	1790.05	0	148	MD09G1151300
MD09G1163300_1	Chr09:13321433|13321586	0	0	0	382.57	0	153	MD09G1163300
MD09G1163400_1	Chr09:13330292|13330536	0	0	0	434.307	0	244	MD09G1163400
MD09G1022300_1	Chr09:1341531|1341661	0	0	0	407.58	0	130	MD09G1022300
n/a_1040	Chr09:13870114|13935299	0	0	0	32.1074	0	65185	n/a
n/a_1041	Chr09:14554592|14554770	0	0	0	328.838	0	178	n/a
MD09G1172800_1	Chr09:14627305|14627473	0	0	0	315.389	0	168	MD09G1172800
n/a_955	Chr09:1466593|1505720	0	0	0	1.89838	0	39127	n/a
n/a_1043	Chr09:14857345|14886977	0	0	0	147.644	0	29632	n/a
MD09G1175500_1	Chr09:14967466|14969420	0	0	0	80.1272	0	927	MD09G1175500
MD09G1179800_2	Chr09:15404428|15404782	0	0	0	304.86	0	192	MD09G1179800
MD09G1181200_1	Chr09:15579887|15580201	0	0	0	421.858	0	314	MD09G1181200
MD09G1184300_3	Chr09:15963472|15964206	0	0	0	138.063	0	538	MD09G1184300
MD09G1187200_1	Chr09:16308166|16309264	0	0	0	298.639	0	490	MD09G1187200
MD09G1187400_2	Chr09:16354484|16356240	0	0	0	155.839	0	510	MD09G1187400
MD09G1190100_1	Chr09:16591920|16593579	0	0	0	154.85	0	378	MD09G1190100
MD09G1027200_1	Chr09:1688973|1689656	0	0	0	261.012	0	203	MD09G1027200
MD09G1193900_2	Chr09:17373485|17374226	0	0	0	343.318	0	463	MD09G1193900
MD09G1028200_1	Chr09:1745279|1745565	0	0	0	357.105	0	208	MD09G1028200
MD09G1194300_1	Chr09:17461014|17461184	0	0	0	344.313	0	170	MD09G1194300
MD09G1196000_1	Chr09:17820271|17820618	0	0	0	253.025	0	347	MD09G1196000
MD09G1196700_1	Chr09:17928918|17929073	0	0	0	341.841	0	155	MD09G1196700
n/a_1046	Chr09:17939216|17968190	0	0	0	6.40053	0	28974	n/a
n/a_962	Chr09:1913950|1926480	0	0	0	8.89201	0	12530	n/a
MD09G1032200_1	Chr09:1953846|1954080	0	0	0	250.142	0	234	MD09G1032200
n/a_967	Chr09:1954489|1954650	0	0	0	329.102	0	161	n/a
MD09G1207100_1	Chr09:19841085|19842060	0	0	0	60.034	0	975	MD09G1207100
MD09G1035200_1	Chr09:2152855|2153077	0	0	0	334.585	0	222	MD09G1035200
n/a_1058	Chr09:22033165|22033328	0	0	0	487.596	0	163	n/a
MD09G1036800_1	Chr09:2258103|2258391	0	0	0	299.353	0	177	MD09G1036800
MD09G1036800_2	Chr09:2258538|2258872	0	0	0	222.389	0	334	MD09G1036800
n/a_971	Chr09:2347006|2362409	0	0	0	12.4	0	15403	n/a
n/a_973	Chr09:2361540|2383099	0	0	0	9.58957	0	21559	n/a
MD09G1041300_1	Chr09:2655174|2656165	0	0	0	74.3134	0	713	MD09G1041300
MD09G1041300_3	Chr09:2657740|2658177	0	0	0	223.882	0	355	MD09G1041300
MD09G1224500_1	Chr09:27405328|27405778	0	0	0	117.484	0	451	MD09G1224500
MD09G1228700_1	Chr09:28255411|28255836	0	0	0	177.373	0	330	MD09G1228700
MD09G1239500_1	Chr09:30452708|30452892	0	0	0	403.684	0	184	MD09G1239500
MD09G1046500_1	Chr09:3047526|3047729	0	0	0	261.012	0	203	MD09G1046500
MD09G1243400_2	Chr09:31104590|31109015	0	0	0	40.9037	0	1431	MD09G1243400
MD09G1244500_1	Chr09:31193628|31196403	0	0	0	92.6158	0	802	MD09G1244500
MD09G1250100_1	Chr09:32030200|32030363	0	0	0	455.693	0	163	MD09G1250100
MD09G1253300_1	Chr09:32435990|32437058	0	0	0	159.737	0	465	MD09G1253300
MD09G1260200_1	Chr09:33291715|33291880	0	0	0	481.686	0	165	MD09G1260200
MD09G1262400_1	Chr09:33580070|33580220	0	0	0	585.332	0	150	MD09G1262400
MD09G1263100_1	Chr09:33621160|33621343	0	0	0	289.538	0	183	MD09G1263100
MD09G1050700_1	Chr09:3366323|3366482	0	0	0	333.242	0	159	MD09G1050700
n/a_1066	Chr09:34144640|34152596	0	0	0	9.33609	0	7956	n/a
MD09G1274600_1	Chr09:35195586|35195905	0	0	0	528.042	0	211	MD09G1274600
n/a_1073	Chr09:35361090|35383196	0	0	0	33.5563	0	22106	n/a
n/a_1078	Chr09:35425345|35456372	0	0	0	7.11029	0	31027	n/a
MD09G1291500_1	Chr09:37348219|37348421	0	0	0	289.768	0	202	MD09G1291500
MD09G1057700_1	Chr09:3813431|3813586	0	0	0	479.212	0	155	MD09G1057700
n/a_985	Chr09:4235437|4241801	0	0	0	12.4887	0	6364	n/a
MD09G1071500_1	Chr09:4936393|4936568	0	0	0	848.89	0	175	MD09G1071500
n/a_990	Chr09:5226776|5291345	0	0	0	22.2098	0	64569	n/a
MD09G1075900_1	Chr09:5356316|5357404	0	0	0	317.278	0	501	MD09G1075900
MD09G1077400_1	Chr09:5447372|5447618	0	0	0	215.388	0	246	MD09G1077400
MD09G1077600_1	Chr09:5471164|5471650	0	0	0	180.658	0	486	MD09G1077600
MD09G1079400_1	Chr09:5570210|5570402	0	0	0	609.721	0	192	MD09G1079400
MD09G1081800_1	Chr09:5763873|5764077	0	0	0	286.927	0	204	MD09G1081800
n/a_992	Chr09:5794967|5798974	0	0	0	18.537	0	4007	n/a
n/a_995	Chr09:6185330|6256316	0	0	0	2.61593	0	70986	n/a
MD09G1117900_1	Chr09:9059527|9060044	0	0	0	439.514	0	338	MD09G1117900
MD09G1121900_1	Chr09:9398618|9398815	0	0	0	594.246	0	197	MD09G1121900
MD10G1077100_2	Chr10:10930624|10930817	0	0	0	769.719	0	193	MD10G1077100
MD10G1077500_1	Chr10:10950955|10951156	0	0	0	436.815	0	201	MD10G1077500
n/a_1086	Chr10:1098609|1124821	0	0	0	3.3496	0	26212	n/a
MD10G1078200_2	Chr10:11158246|11159378	0	0	0	72.6823	0	729	MD10G1078200
MD10G1007800_1	Chr10:1192772|1192953	0	0	0	292.737	0	181	MD10G1007800
MD10G1081900_2	Chr10:12047047|12048207	0	0	0	167.293	0	444	MD10G1081900
MD10G1082200_2	Chr10:12103988|12107483	0	0	0	119.61	0	621	MD10G1082200
MD10G1009100_1	Chr10:1318343|1319443	0	0	0	136.04	0	546	MD10G1009100
MD10G1011000_1	Chr10:1548626|1548936	0	0	0	188.817	0	310	MD10G1011000
MD10G1114300_1	Chr10:18747808|18747968	0	0	0	827.897	0	160	MD10G1114300
MD10G1118400_1	Chr10:19581121|19581296	0	0	0	302.774	0	175	MD10G1118400
MD10G1120300_1	Chr10:19698580|19698773	0	0	0	758.202	0	193	MD10G1120300
MD10G1126500_1	Chr10:20633600|20634037	0	0	0	159.115	0	333	MD10G1126500
n/a_1128	Chr10:20792984|20793162	0	0	0	328.838	0	178	n/a
n/a_1129	Chr10:21027380|21060790	0	0	0	13.9028	0	33410	n/a
n/a_1091	Chr10:2171771|2216818	0	0	0	7.54545	0	45047	n/a
MD10G1135300_1	Chr10:21812946|21813182	0	0	0	372.033	0	236	MD10G1135300
n/a_1131	Chr10:21815848|21821847	0	0	0	14.6357	0	5999	n/a
MD10G1135300_2	Chr10:21818941|21819516	0	0	0	151.279	0	491	MD10G1135300
MD10G1140500_1	Chr10:22500059|22500236	0	0	0	299.353	0	177	MD10G1140500
Apple_newGene_55376_1	Chr10:23272586|23272809	0	0	0	237.603	0	223	Apple_newGene_55376
MD10G1148200_1	Chr10:23583291|23584617	0	0	0	97.7591	0	542	MD10G1148200
MD10G1154600_1	Chr10:24232289|24232507	0	0	0	681.449	0	218	MD10G1154600
MD10G1156400_1	Chr10:24496766|24496928	0	0	0	458.506	0	162	MD10G1156400
n/a_1141	Chr10:25068639|25068791	0	0	0	385.087	0	152	n/a
MD10G1163500_1	Chr10:25435002|25437404	0	0	0	26.9646	0	1965	MD10G1163500
MD10G1164000_1	Chr10:25487012|25488323	0	0	0	52.6851	0	1111	MD10G1164000
MD10G1164000_2	Chr10:25488009|25488199	0	0	0	390.936	0	190	MD10G1164000
MD10G1164600_1	Chr10:25535506|25537477	0	0	0	133.593	0	556	MD10G1164600
MD10G1170900_1	Chr10:26360985|26361433	0	0	0	130.654	0	448	MD10G1170900
MD10G1021900_2	Chr10:2725732|2726102	0	0	0	247.595	0	214	MD10G1021900
n/a_1143	Chr10:27435814|27437044	0	0	0	60.3885	0	1230	n/a
n/a_1095	Chr10:2752080|2802909	0	0	0	13.6423	0	50829	n/a
n/a_1097	Chr10:2802993|2820916	0	0	0	2.95628	0	17923	n/a
n/a_1098	Chr10:2802998|2820922	0	0	0	3.26563	0	17924	n/a
n/a_1146	Chr10:31167342|31169938	0	0	0	22.5475	0	2596	n/a
MD10G1218000_1	Chr10:31623656|31624051	0	0	0	428.815	0	273	MD10G1218000
n/a_1149	Chr10:32108152|32151179	0	0	0	2.72077	0	43027	n/a
MD10G1223800_1	Chr10:32172044|32172251	0	0	0	282.769	0	207	MD10G1223800
MD10G1229900_1	Chr10:32684054|32684233	0	0	0	622.44	0	179	MD10G1229900
n/a_1150	Chr10:32930848|32935197	0	0	0	48.7334	0	4349	n/a
n/a_1155	Chr10:33600887|33606401	0	0	0	70.7862	0	5514	n/a
n/a_1158	Chr10:34164375|34205750	0	0	0	3.84184	0	41375	n/a
MD10G1252600_1	Chr10:34546551|34547162	0	0	0	305.216	0	434	MD10G1252600
n/a_1161	Chr10:34724230|34761064	0	0	0	25.4257	0	36834	n/a
n/a_1162	Chr10:35014875|35015050	0	0	0	424.445	0	175	n/a
MD10G1258000_1	Chr10:35217838|35218005	0	0	0	350.498	0	167	MD10G1258000
MD10G1259300_1	Chr10:35331719|35333482	0	0	0	110.579	0	794	MD10G1259300
MD10G1261800_1	Chr10:35617885|35618532	0	0	0	137.402	0	426	MD10G1261800
n/a_1167	Chr10:36815838|36836321	0	0	0	5.71529	0	20483	n/a
MD10G1290500_1	Chr10:37917755|37918009	0	0	0	873.858	0	255	MD10G1290500
MD10G1296700_1	Chr10:38439466|38439903	0	0	0	133.943	0	437	MD10G1296700
MD10G1300800_1	Chr10:38813230|38814901	0	0	0	168.743	0	471	MD10G1300800
n/a_1175	Chr10:39796933|39828439	0	0	0	17.698	0	31506	n/a
n/a_1176	Chr10:39798366|39830008	0	0	0	1.84986	0	31642	n/a
MD10G1314900_14	Chr10:39895956|39896131	0	0	0	454.161	0	175	MD10G1314900
n/a_1177	Chr10:40033020|40070665	0	0	0	1.4075	0	37645	n/a
MD10G1319600_1	Chr10:40175803|40176719	0	0	0	95.7468	0	917	MD10G1319600
MD10G1320600_1	Chr10:40227322|40228186	0	0	0	121.187	0	483	MD10G1320600
MD10G1325600_1	Chr10:40596259|40596488	0	0	0	324.358	0	229	MD10G1325600
MD10G1328000_1	Chr10:40745794|40745946	0	0	0	1347.8	0	152	MD10G1328000
MD10G1329100_1	Chr10:40804177|40804328	0	0	0	387.637	0	151	MD10G1329100
MD10G1332200_1	Chr10:40970533|40970988	0	0	0	116.451	0	455	MD10G1332200
MD10G1332400_1	Chr10:40983141|40983501	0	0	0	147.182	0	360	MD10G1332400
MD10G1332400_2	Chr10:40983154|40983355	0	0	0	263.609	0	201	MD10G1332400
MD10G1332400_6	Chr10:40983351|40983501	0	0	0	742.779	0	150	MD10G1332400
n/a_1186	Chr10:41060498|41137024	0	0	0	1.14732	0	76526	n/a
n/a_1187	Chr10:41137604|41192840	0	0	0	13.8502	0	55236	n/a
n/a_1189	Chr10:41195165|41196042	0	0	0	66.7425	0	877	n/a
MD10G1342300_2	Chr10:41715400|41725196	0	0	0	121.369	0	612	MD10G1342300
MD10G1033400_1	Chr10:4346316|4346473	0	0	0	1416.13	0	62	MD10G1033400
n/a_1100	Chr10:4431690|4484434	0	0	0	1.00458	0	52744	n/a
MD10G1037200_1	Chr10:4894654|4894959	0	0	0	365.301	0	305	MD10G1037200
MD10G1039200_2	Chr10:5161652|5161822	0	0	0	311.679	0	170	MD10G1039200
MD10G1043100_1	Chr10:5800942|5801731	0	0	0	303.175	0	245	MD10G1043100
n/a_1108	Chr10:5873481|5936044	0	0	0	1.69383	0	62563	n/a
n/a_1110	Chr10:6479047|6480149	0	0	0	67.4028	0	1102	n/a
MD10G1051700_1	Chr10:6857496|6858910	0	0	0	82.1658	0	904	MD10G1051700
MD10G1052300_1	Chr10:6927918|6931416	0	0	0	98.1211	0	540	MD10G1052300
MD10G1004100_1	Chr10:718369|718820	0	0	0	129.785	0	451	MD10G1004100
MD10G1004400_2	Chr10:727387|727590	0	0	0	365.901	0	203	MD10G1004400
MD10G1054400_1	Chr10:7449835|7450142	0	0	0	241.948	0	307	MD10G1054400
MD10G1057400_2	Chr10:7809330|7809838	0	0	0	115.223	0	508	MD10G1057400
n/a_1111	Chr10:8287108|8287271	0	0	0	359.099	0	163	n/a
MD10G1063500_1	Chr10:8648193|8649164	0	0	0	199.568	0	531	MD10G1063500
MD10G1069700_1	Chr10:9642169|9643102	0	0	0	109.204	0	536	MD10G1069700
MD11G1117100_3	Chr11:10604608|10605103	0	0	0	280.063	0	418	MD11G1117100
MD11G1121400_1	Chr11:11197563|11198189	0	0	0	142.818	0	371	MD11G1121400
MD11G1129900_1	Chr11:11794639|11795067	0	0	0	205.14	0	428	MD11G1129900
MD11G1131300_1	Chr11:11882606|11882768	0	0	0	903.29	0	162	MD11G1131300
n/a_1273	Chr11:11882751|11882944	0	0	0	303.281	0	193	n/a
MD11G1016100_1	Chr11:1269745|1273558	0	0	0	127.406	0	1166	MD11G1016100
MD11G1016100_2	Chr11:1283529|1284105	0	0	0	101.62	0	576	MD11G1016100
MD11G1142500_1	Chr11:13288625|13288799	0	0	0	504.596	0	174	MD11G1142500
MD11G1143700_1	Chr11:13376754|13376905	0	0	0	350.897	0	151	MD11G1143700
n/a_1274	Chr11:13398959|13402371	0	0	0	23.2937	0	3412	n/a
MD11G1149200_1	Chr11:14124329|14126030	0	0	0	168.813	0	660	MD11G1149200
MD11G1149500_1	Chr11:14149689|14150286	0	0	0	209.047	0	280	MD11G1149500
MD11G1158400_1	Chr11:15398635|15400079	0	0	0	43.878	0	1334	MD11G1158400
n/a_1199	Chr11:1658282|1668642	0	0	0	5.64992	0	10360	n/a
MD11G1020500_1	Chr11:1779167|1779364	0	0	0	268.962	0	197	MD11G1020500
MD11G1168400_1	Chr11:18026054|18026214	0	0	0	365.832	0	160	MD11G1168400
MD11G1168700_1	Chr11:18098192|18098998	0	0	0	158.627	0	369	MD11G1168700
MD11G1170100_1	Chr11:18288182|18289709	0	0	0	171.15	0	342	MD11G1170100
MD11G1173100_1	Chr11:19954326|19954698	0	0	0	198.447	0	267	MD11G1173100
MD11G1173100_2	Chr11:19966486|19966969	0	0	0	141.294	0	375	MD11G1173100
MD11G1173100_3	Chr11:19966557|19966969	0	0	0	385.087	0	304	MD11G1173100
MD11G1173900_1	Chr11:20308311|20308467	0	0	0	714.863	0	156	MD11G1173900
MD11G1174700_1	Chr11:20485154|20485307	0	0	0	482.324	0	154	MD11G1174700
MD11G1176400_1	Chr11:20900099|20900710	0	0	0	159.916	0	497	MD11G1176400
n/a_1276	Chr11:21014925|21017676	0	0	0	54.0007	0	2751	n/a
MD11G1177700_1	Chr11:21275462|21279059	0	0	0	86.1693	0	862	MD11G1177700
MD11G1178400_1	Chr11:21376418|21377498	0	0	0	282.464	0	686	MD11G1178400
MD11G1179300_1	Chr11:21539899|21540084	0	0	0	316.396	0	185	MD11G1179300
MD11G1027500_1	Chr11:2397696|2397925	0	0	0	392.485	0	135	MD11G1027500
MD11G1183500_1	Chr11:24038302|24039358	0	0	0	140.032	0	627	MD11G1183500
MD11G1184200_1	Chr11:24526709|24527607	0	0	0	65.1817	0	898	MD11G1184200
Apple_newGene_59837_2	Chr11:24722978|24723344	0	0	0	391.963	0	224	Apple_newGene_59837
MD11G1186900_1	Chr11:26272955|26273211	0	0	0	206.974	0	256	MD11G1186900
MD11G1031000_1	Chr11:2697577|2697747	0	0	0	344.313	0	170	MD11G1031000
MD11G1193000_1	Chr11:27431622|27431781	0	0	0	552.2	0	159	MD11G1193000
MD11G1194100_1	Chr11:27812050|27812259	0	0	0	355.397	0	209	MD11G1194100
MD11G1194800_1	Chr11:27916410|27917256	0	0	0	223.729	0	498	MD11G1194800
MD11G1200400_1	Chr11:28876896|28877079	0	0	0	811.78	0	183	MD11G1200400
MD11G1211000_1	Chr11:30857695|30857845	0	0	0	390.221	0	150	MD11G1211000
MD11G1035000_1	Chr11:3095893|3096076	0	0	0	479.78	0	183	MD11G1035000
MD11G1213600_1	Chr11:31239885|31240090	0	0	0	724.662	0	205	MD11G1213600
MD11G1214500_1	Chr11:31313517|31314607	0	0	0	86.8613	0	610	MD11G1214500
MD11G1215500_1	Chr11:31476295|31476484	0	0	0	464.549	0	189	MD11G1215500
MD11G1216400_1	Chr11:31585506|31585859	0	0	0	191.283	0	277	MD11G1216400
n/a_1279	Chr11:31791320|31791485	0	0	0	481.686	0	165	n/a
MD11G1037400_1	Chr11:3204705|3205224	0	0	0	102.091	0	519	MD11G1037400
n/a_1282	Chr11:32347395|32368295	0	0	0	6.08915	0	20900	n/a
MD11G1226300_2	Chr11:33017330|33017573	0	0	0	305.67	0	243	MD11G1226300
n/a_1284	Chr11:33928361|33928597	0	0	0	224.514	0	236	n/a
MD11G1234900_1	Chr11:34197133|34197328	0	0	0	300.17	0	195	MD11G1234900
MD11G1243000_2	Chr11:35317088|35319031	0	0	0	87.6245	0	668	MD11G1243000
MD11G1041700_1	Chr11:3561183|3563255	0	0	0	94.307	0	931	MD11G1041700
MD11G1043500_1	Chr11:3724636|3725318	0	0	0	128.739	0	682	MD11G1043500
MD11G1280200_1	Chr11:39803549|39803909	0	0	0	162.592	0	360	MD11G1280200
MD11G1287000_1	Chr11:40671689|40671851	0	0	0	458.506	0	162	MD11G1287000
MD11G1046800_2	Chr11:4069865|4072745	0	0	0	26.3216	0	2013	MD11G1046800
MD11G1289100_1	Chr11:40871836|40872584	0	0	0	226.434	0	517	MD11G1289100
n/a_1306	Chr11:41044862|41055651	0	0	0	41.744	0	10789	n/a
n/a_1309	Chr11:41482958|41483596	0	0	0	166.098	0	638	n/a
MD11G1297500_1	Chr11:41483326|41483596	0	0	0	216.79	0	270	MD11G1297500
MD11G1302000_1	Chr11:41766396|41766550	0	0	0	570.128	0	154	MD11G1302000
n/a_1312	Chr11:41797904|41828936	0	0	0	25.1169	0	31032	n/a
MD11G1305200_1	Chr11:41995962|41996279	0	0	0	167.146	0	317	MD11G1305200
n/a_1314	Chr11:42001846|42031240	0	0	0	5.97399	0	29394	n/a
n/a_1319	Chr11:42018174|42029868	0	0	0	9.06198	0	11694	n/a
MD11G1305800_1	Chr11:42053434|42054561	0	0	0	107.041	0	495	MD11G1305800
n/a_1330	Chr11:42738106|42749051	0	0	0	6.78647	0	10945	n/a
MD11G1318000_1	Chr11:42989741|42989987	0	0	0	237.94	0	246	MD11G1318000
n/a_1219	Chr11:4304609|4373879	0	0	0	1.69	0	69270	n/a
MD11G1051300_1	Chr11:4392307|4393690	0	0	0	152.209	0	488	MD11G1051300
MD11G1054300_1	Chr11:4626125|4627096	0	0	0	79.5288	0	736	MD11G1054300
MD11G1056000_2	Chr11:4753704|4754049	0	0	0	538.246	0	345	MD11G1056000
MD11G1056000_3	Chr11:4761121|4761303	0	0	0	1545.97	0	182	MD11G1056000
MD11G1061100_1	Chr11:5318758|5318953	0	0	0	571.368	0	195	MD11G1061100
n/a_1228	Chr11:5531285|5555482	0	0	0	168.122	0	24197	n/a
MD11G1074000_1	Chr11:6261848|6262011	0	0	0	650.128	0	163	MD11G1074000
n/a_1239	Chr11:6487319|6510709	0	0	0	9.52688	0	23390	n/a
MD11G1082500_1	Chr11:7015956|7016654	0	0	0	270.334	0	196	MD11G1082500
n/a_1248	Chr11:7075111|7093866	0	0	0	90.5072	0	18755	n/a
MD11G1092300_1	Chr11:7657033|7657227	0	0	0	273.121	0	194	MD11G1092300
n/a_1254	Chr11:7793891|7800798	0	0	0	48.393	0	6907	n/a
MD11G1094700_1	Chr11:7910580|7910840	0	0	0	285.684	0	260	MD11G1094700
MD11G1094800_1	Chr11:7918692|7921798	0	0	0	121.944	0	720	MD11G1094800
MD11G1098000_1	Chr11:8127976|8128185	0	0	0	280.063	0	209	MD11G1098000
n/a_1258	Chr11:8313500|8336927	0	0	0	2.49854	0	23427	n/a
MD11G1110000_1	Chr11:9721941|9722300	0	0	0	685.433	0	360	MD11G1110000
MD11G1110600_1	Chr11:9783690|9784163	0	0	0	345.668	0	254	MD11G1110600
MD12G1083100_1	Chr12:10084453|10085002	0	0	0	212.848	0	550	MD12G1083100
n/a_1335	Chr12:1062427|1062596	0	0	0	346.35	0	169	n/a
MD12G1093700_1	Chr12:12302262|12303392	0	0	0	304.418	0	244	MD12G1093700
MD12G1095800_4	Chr12:13260427|13260964	0	0	0	234.449	0	339	MD12G1095800
MD12G1017600_1	Chr12:1702035|1702199	0	0	0	356.91	0	164	MD12G1017600
MD12G1111200_1	Chr12:17625266|17625866	0	0	0	97.5553	0	600	MD12G1111200
MD12G1112900_1	Chr12:17865054|17865376	0	0	0	470.982	0	225	MD12G1112900
MD12G1113000_2	Chr12:17893534|17894396	0	0	0	287.184	0	369	MD12G1113000
MD12G1115200_1	Chr12:18366397|18369595	0	0	0	34.6145	0	1691	MD12G1115200
MD12G1120000_1	Chr12:19206246|19207584	0	0	0	322.497	0	363	MD12G1120000
MD12G1120600_2	Chr12:19329688|19329916	0	0	0	488.67	0	228	MD12G1120600
MD12G1120600_3	Chr12:19329744|19329916	0	0	0	863.696	0	172	MD12G1120600
MD12G1120600_7	Chr12:19330194|19330422	0	0	0	580.98	0	228	MD12G1120600
MD12G1124000_1	Chr12:19906437|19906599	0	0	0	722.632	0	162	MD12G1124000
MD12G1124800_1	Chr12:19979582|19979758	0	0	0	301.054	0	176	MD12G1124800
MD12G1124900_1	Chr12:20001349|20001537	0	0	0	281.837	0	188	MD12G1124900
MD12G1125800_2	Chr12:20110629|20112204	0	0	0	85.9518	0	681	MD12G1125800
n/a_1372	Chr12:20180679|20246090	0	0	0	3.24015	0	65411	n/a
n/a_1339	Chr12:2062327|2107517	0	0	0	6.57472	0	45190	n/a
MD12G1141500_7	Chr12:22000056|22000239	0	0	0	639.707	0	183	MD12G1141500
MD12G1141500_8	Chr12:22000056|22000247	0	0	0	388.89	0	191	MD12G1141500
MD12G1156300_1	Chr12:23698714|23698890	0	0	0	498.862	0	176	MD12G1156300
MD12G1167200_1	Chr12:24761646|24761811	0	0	0	321.124	0	165	MD12G1167200
MD12G1168500_1	Chr12:24890921|24891161	0	0	0	220.773	0	240	MD12G1168500
n/a_1384	Chr12:25064863|25067320	0	0	0	35.7345	0	2457	n/a
MD12G1184100_1	Chr12:26419595|26419752	0	0	0	470.113	0	158	MD12G1184100
n/a_1393	Chr12:27469467|27469642	0	0	0	424.445	0	175	n/a
n/a_1394	Chr12:27929761|27936951	0	0	0	36.8466	0	7190	n/a
MD12G1198800_1	Chr12:27979410|27979566	0	0	0	750.425	0	156	MD12G1198800
MD12G1198800_4	Chr12:27980339|27980533	0	0	0	273.121	0	194	MD12G1198800
MD12G1202300_1	Chr12:28281448|28281759	0	0	0	238.836	0	311	MD12G1202300
MD12G1001500_1	Chr12:283815|284179	0	0	0	440.099	0	133	MD12G1001500
MD12G1206000_1	Chr12:28644527|28644788	0	0	0	304.514	0	261	MD12G1206000
MD12G1206100_1	Chr12:28655943|28656098	0	0	0	375.213	0	156	MD12G1206100
MD12G1206600_2	Chr12:28699965|28700540	0	0	0	138.223	0	575	MD12G1206600
n/a_1400	Chr12:28785967|28792514	0	0	0	17.8809	0	6547	n/a
n/a_1401	Chr12:28787105|28793476	0	0	0	9.18744	0	6371	n/a
MD12G1213400_1	Chr12:29182188|29182488	0	0	0	249.931	0	212	MD12G1213400
MD12G1217600_1	Chr12:29502086|29502260	0	0	0	336.398	0	174	MD12G1217600
n/a_1409	Chr12:29854812|29856242	0	0	0	37.0527	0	1430	n/a
n/a_1413	Chr12:30123586|30166066	0	0	0	11.7121	0	42480	n/a
n/a_1415	Chr12:30656740|30656970	0	0	0	322.947	0	230	n/a
n/a_1422	Chr12:31189559|31210367	0	0	0	45.555	0	20808	n/a
n/a_1423	Chr12:31194451|31209184	0	0	0	49.6616	0	14733	n/a
n/a_1425	Chr12:31200686|31215937	0	0	0	25.6089	0	15251	n/a
MD12G1240400_1	Chr12:31265155|31265959	0	0	0	136.29	0	545	MD12G1240400
MD12G1240900_1	Chr12:31296611|31297252	0	0	0	227.933	0	642	MD12G1240900
MD12G1244700_1	Chr12:31548063|31548232	0	0	0	519.525	0	169	MD12G1244700
n/a_1431	Chr12:31809319|31850193	0	0	0	3.5801	0	40874	n/a
n/a_1432	Chr12:32089492|32116617	0	0	0	2.15791	0	27125	n/a
MD12G1033300_2	Chr12:3685972|3687781	0	0	0	159.491	0	367	MD12G1033300
MD12G1040200_1	Chr12:4369126|4369364	0	0	0	222.628	0	238	MD12G1040200
MD12G1043900_1	Chr12:4941773|4942269	0	0	0	453.179	0	363	MD12G1043900
MD12G1004700_2	Chr12:610759|611148	0	0	0	174.294	0	304	MD12G1004700
MD12G1060300_1	Chr12:7031961|7033046	0	0	0	173.438	0	611	MD12G1060300
MD12G1063100_1	Chr12:7385796|7387779	0	0	0	48.8999	0	1197	MD12G1063100
MD12G1064400_1	Chr12:7488363|7489142	0	0	0	95.3503	0	779	MD12G1064400
MD12G1066800_2	Chr12:7918072|7919133	0	0	0	116.606	0	637	MD12G1066800
MD12G1074900_1	Chr12:9051329|9052001	0	0	0	247.595	0	428	MD12G1074900
n/a_1349	Chr12:9278866|9321751	0	0	0	1.73203	0	42885	n/a
MD12G1079400_1	Chr12:9690140|9691690	0	0	0	157.703	0	471	MD12G1079400
MD12G1079400_2	Chr12:9695223|9695957	0	0	0	72.1872	0	734	MD12G1079400
n/a_1353	Chr12:9877845|9891590	0	0	0	5.78233	0	13745	n/a
n/a_1354	Chr12:9878364|9892109	0	0	0	8.10599	0	13745	n/a
MD13G1131800_1	Chr13:10004387|10005676	0	0	0	49.6583	0	1067	MD13G1131800
MD13G1150500_1	Chr13:11796140|11796344	0	0	0	259.732	0	204	MD13G1150500
MD13G1150500_2	Chr13:11796140|11796639	0	0	0	191.285	0	306	MD13G1150500
MD13G1161400_1	Chr13:12714943|12715179	0	0	0	629.474	0	236	MD13G1161400
MD13G1002100_1	Chr13:132039|132353	0	0	0	236.554	0	314	MD13G1002100
n/a_1476	Chr13:14254504|14254706	0	0	0	289.768	0	202	n/a
MD13G1174200_1	Chr13:14353753|14354391	0	0	0	308.055	0	172	MD13G1174200
MD13G1174700_1	Chr13:14423110|14423616	0	0	0	157.071	0	506	MD13G1174700
MD13G1174700_2	Chr13:14427721|14428057	0	0	0	435.515	0	336	MD13G1174700
MD13G1179300_1	Chr13:14949113|14949695	0	0	0	433.579	0	270	MD13G1179300
MD13G1179900_1	Chr13:15003720|15004458	0	0	0	157.036	0	473	MD13G1179900
MD13G1182100_1	Chr13:15234422|15235525	0	0	0	255.827	0	572	MD13G1182100
n/a_1451	Chr13:1597766|1598006	0	0	0	365.832	0	240	n/a
MD13G1023200_1	Chr13:1674368|1674530	0	0	0	327.07	0	162	MD13G1023200
MD13G1193700_1	Chr13:16765961|16766112	0	0	0	491.907	0	151	MD13G1193700
MD13G1023300_1	Chr13:1677949|1678751	0	0	0	245.142	0	303	MD13G1023300
MD13G1197600_1	Chr13:17318294|17319417	0	0	0	56.3904	0	1038	MD13G1197600
MD13G1200700_1	Chr13:17870605|17871244	0	0	0	129.233	0	410	MD13G1200700
MD13G1208100_1	Chr13:19098795|19099007	0	0	0	552.2	0	212	MD13G1208100
MD13G1208100_2	Chr13:19098832|19099007	0	0	0	1003.43	0	175	MD13G1208100
MD13G1208100_4	Chr13:19099328|19100066	0	0	0	302.774	0	350	MD13G1208100
MD13G1208100_5	Chr13:19100891|19101538	0	0	0	498.032	0	522	MD13G1208100
n/a_1482	Chr13:19527088|19527293	0	0	0	387.698	0	205	n/a
MD13G1027800_1	Chr13:2000321|2000534	0	0	0	274.804	0	213	MD13G1027800
MD13G1028300_1	Chr13:2021929|2023662	0	0	0	160.511	0	1094	MD13G1028300
MD13G1221800_2	Chr13:21467342|21467581	0	0	0	975.553	0	240	MD13G1221800
MD13G1029800_1	Chr13:2150626|2150787	0	0	0	363.56	0	161	MD13G1029800
MD13G1231400_1	Chr13:22986468|22987233	0	0	0	143.592	0	369	MD13G1231400
MD13G1236100_1	Chr13:23854046|23854239	0	0	0	454.921	0	193	MD13G1236100
MD13G1238400_1	Chr13:24220042|24220204	0	0	0	327.07	0	162	MD13G1238400
MD13G1035300_1	Chr13:2472906|2473243	0	0	0	220.409	0	337	MD13G1035300
MD13G1240600_1	Chr13:24940293|24940653	0	0	0	412.655	0	360	MD13G1240600
MD13G1036200_1	Chr13:2523820|2524139	0	0	0	349.269	0	319	MD13G1036200
MD13G1245500_1	Chr13:25725365|25725548	0	0	0	289.538	0	183	MD13G1245500
Apple_newGene_3913_2	Chr13:26516867|26518085	0	0	0	43.502	0	1218	Apple_newGene_3913
MD13G1040300_1	Chr13:2737518|2737996	0	0	0	225.47	0	235	MD13G1040300
MD13G1000300_1	Chr13:31693|40912	0	0	0	26.9709	0	2754	MD13G1000300
MD13G1262800_2	Chr13:33404706|33404985	0	0	0	474.78	0	279	MD13G1262800
MD13G1264600_1	Chr13:34157806|34158022	0	0	0	245.303	0	216	MD13G1264600
MD13G1049500_1	Chr13:3511912|3512129	0	0	0	972.21	0	218	MD13G1049500
MD13G1273000_1	Chr13:36941193|36941878	0	0	0	309.404	0	685	MD13G1273000
MD13G1052600_1	Chr13:3731199|3731359	0	0	0	365.832	0	160	MD13G1052600
MD13G1275700_2	Chr13:38004978|38007349	0	0	0	76.9019	0	689	MD13G1275700
MD13G1054900_1	Chr13:3850511|3851244	0	0	0	990.382	0	428	MD13G1054900
MD13G1278000_1	Chr13:38773681|38776553	0	0	0	73.7194	0	794	MD13G1278000
MD13G1006200_1	Chr13:388433|388609	0	0	0	301.054	0	176	MD13G1006200
MD13G1278700_1	Chr13:39160372|39160794	0	0	0	258.808	0	287	MD13G1278700
MD13G1058900_1	Chr13:4108914|4109091	0	0	0	496.044	0	177	MD13G1058900
MD13G1061700_1	Chr13:4326663|4326815	0	0	0	385.087	0	152	MD13G1061700
MD13G1063400_1	Chr13:4391362|4392513	0	0	0	76.7905	0	690	MD13G1063400
MD13G1070100_1	Chr13:4900461|4900638	0	0	0	330.696	0	177	MD13G1070100
MD13G1070200_1	Chr13:4922600|4922795	0	0	0	300.17	0	195	MD13G1070200
MD13G1072000_1	Chr13:5062089|5062470	0	0	0	153.63	0	381	MD13G1072000
MD13G1072400_1	Chr13:5095186|5095360	0	0	0	640.327	0	174	MD13G1072400
MD13G1078800_1	Chr13:5529751|5531771	0	0	0	201.839	0	870	MD13G1078800
MD13G1078800_2	Chr13:5530497|5530768	0	0	0	700.865	0	189	MD13G1078800
MD13G1009600_1	Chr13:618425|618595	0	0	0	873.858	0	170	MD13G1009600
MD13G1089000_1	Chr13:6234527|6234766	0	0	0	244.909	0	239	MD13G1089000
n/a_1459	Chr13:6419457|6437069	0	0	0	144.572	0	17612	n/a
MD13G1092100_1	Chr13:6499661|6500144	0	0	0	121.187	0	483	MD13G1092100
MD13G1010700_1	Chr13:650284|650839	0	0	0	112.02	0	473	MD13G1010700
MD13G1010700_2	Chr13:650359|650717	0	0	0	212.077	0	276	MD13G1010700
MD13G1093300_1	Chr13:6582198|6582666	0	0	0	113.217	0	468	MD13G1093300
MD13G1094400_1	Chr13:6655417|6655726	0	0	0	189.428	0	309	MD13G1094400
MD13G1097900_1	Chr13:6942013|6942940	0	0	0	371.176	0	571	MD13G1097900
n/a_1463	Chr13:7370012|7409590	0	0	0	38.932	0	39578	n/a
n/a_1464	Chr13:7388701|7406236	0	0	0	240.692	0	17535	n/a
n/a_1465	Chr13:7388701|7441995	0	0	0	26.481	0	53294	n/a
MD13G1109300_1	Chr13:7919467|7919638	0	0	0	434.374	0	171	MD13G1109300
MD13G1111600_1	Chr13:8124136|8124334	0	0	0	562.711	0	198	MD13G1111600
MD13G1120900_1	Chr13:8885020|8885760	0	0	0	527.51	0	452	MD13G1120900
MD13G1121000_1	Chr13:8892567|8892825	0	0	0	567.182	0	258	MD13G1121000
MD13G1123200_1	Chr13:9137279|9137458	0	0	0	829.921	0	179	MD13G1123200
MD13G1125000_1	Chr13:9266907|9267098	0	0	0	459.685	0	191	MD13G1125000
MD13G1125500_1	Chr13:9302661|9303218	0	0	0	257.909	0	288	MD13G1125500
MD13G1131600_1	Chr13:9994239|9994549	0	0	0	170.921	0	310	MD13G1131600
n/a_1497	Chr14:1111545|1129673	0	0	0	2.92285	0	18128	n/a
MD14G1089200_1	Chr14:11163314|11163518	0	0	0	286.927	0	204	MD14G1089200
MD14G1095600_1	Chr14:14472331|14473448	0	0	0	128.605	0	412	MD14G1095600
MD14G1097400_1	Chr14:14778122|14778500	0	0	0	589.507	0	378	MD14G1097400
MD14G1000100_1	Chr14:15193|15720	0	0	0	150.812	0	527	MD14G1000100
MD14G1017400_1	Chr14:1614336|1615082	0	0	0	320.154	0	331	MD14G1017400
MD14G1017400_2	Chr14:1614359|1615082	0	0	0	499.208	0	308	MD14G1017400
n/a_1500	Chr14:1666605|1678974	0	0	0	6.42559	0	12369	n/a
MD14G1107600_1	Chr14:16826804|16827206	0	0	0	176.618	0	300	MD14G1107600
n/a_1527	Chr14:18203306|18228195	0	0	0	15.2865	0	24889	n/a
MD14G1000100_3	Chr14:18642|19930	0	0	0	113.217	0	468	MD14G1000100
MD14G1115200_1	Chr14:18719880|18720036	0	0	0	562.819	0	156	MD14G1115200
MD14G1117900_1	Chr14:19271591|19271926	0	0	0	158.165	0	335	MD14G1117900
MD14G1121300_1	Chr14:19594980|19595176	0	0	0	270.334	0	196	MD14G1121300
n/a_1529	Chr14:21576589|21596262	0	0	0	23.6106	0	19673	n/a
n/a_1530	Chr14:23563790|23578423	0	0	0	5.07605	0	14633	n/a
n/a_1532	Chr14:23599780|23608211	0	0	0	159.68	0	8431	n/a
MD14G1147300_1	Chr14:24013309|24013750	0	0	0	425.961	0	324	MD14G1147300
n/a_1511	Chr14:2406298|2411948	0	0	0	31.0796	0	5650	n/a
MD14G1152400_1	Chr14:24665631|24665855	0	0	0	331.598	0	224	MD14G1152400
MD14G1152400_2	Chr14:24665774|24665978	0	0	0	364.107	0	204	MD14G1152400
MD14G1156300_1	Chr14:25070059|25070239	0	0	0	441.545	0	180	MD14G1156300
MD14G1162400_1	Chr14:25694333|25695205	0	0	0	211.942	0	250	MD14G1162400
MD14G1029000_1	Chr14:2573708|2573872	0	0	0	535.365	0	164	MD14G1029000
MD14G1163600_2	Chr14:25765245|25766378	0	0	0	281.41	0	624	MD14G1163600
MD14G1166400_1	Chr14:25984596|25985064	0	0	0	154.85	0	378	MD14G1166400
MD14G1170800_1	Chr14:26497373|26498127	0	0	0	158.198	0	555	MD14G1170800
MD14G1179400_2	Chr14:27204345|27204765	0	0	0	510.464	0	172	MD14G1179400
MD14G1182200_1	Chr14:27462837|27463146	0	0	0	171.474	0	309	MD14G1182200
MD14G1031300_1	Chr14:2804482|2805038	0	0	0	342.299	0	171	MD14G1031300
MD14G1190700_1	Chr14:28179477|28179672	0	0	0	300.17	0	195	MD14G1190700
MD14G1032100_1	Chr14:2876371|2877798	0	0	0	131.832	0	444	MD14G1032100
MD14G1032100_2	Chr14:2877332|2878373	0	0	0	130.947	0	447	MD14G1032100
MD14G1202900_1	Chr14:29116064|29116223	0	0	0	552.2	0	159	MD14G1202900
MD14G1032400_1	Chr14:2923945|2924119	0	0	0	426.884	0	174	MD14G1032400
n/a_1551	Chr14:29552176|29554917	0	0	0	27.0988	0	2741	n/a
MD14G1213700_2	Chr14:29812286|29812439	0	0	0	692.62	0	153	MD14G1213700
MD14G1213900_1	Chr14:29822536|29823616	0	0	0	115.698	0	642	MD14G1213900
MD14G1220100_1	Chr14:30229568|30229842	0	0	0	213.625	0	274	MD14G1220100
n/a_1553	Chr14:30291940|30292093	0	0	0	382.57	0	153	n/a
MD14G1230200_1	Chr14:31102290|31103954	0	0	0	147.811	0	396	MD14G1230200
MD14G1233200_1	Chr14:31340212|31340554	0	0	0	218.948	0	242	MD14G1233200
MD14G1236800_1	Chr14:31668003|31668189	0	0	0	399.344	0	186	MD14G1236800
MD14G1001900_1	Chr14:318469|319141	0	0	0	87.103	0	672	MD14G1001900
MD14G1244600_1	Chr14:32275505|32276838	0	0	0	157.771	0	742	MD14G1244600
MD14G1245900_2	Chr14:32369555|32370168	0	0	0	582.115	0	319	MD14G1245900
MD14G1246000_2	Chr14:32382359|32382611	0	0	0	232.275	0	252	MD14G1246000
MD14G1039100_1	Chr14:3602453|3602651	0	0	0	375.141	0	198	MD14G1039100
MD14G1041700_1	Chr14:3959676|3961146	0	0	0	100.99	0	1471	MD14G1041700
MD14G1005500_1	Chr14:588850|589052	0	0	0	735.425	0	202	MD14G1005500
MD14G1063700_1	Chr14:6742746|6743180	0	0	0	488.345	0	434	MD14G1063700
MD14G1074400_1	Chr14:8292534|8297810	0	0	0	59.0679	0	2515	MD14G1074400
MD15G1139900_1	Chr15:10286633|10289026	0	0	0	66.5646	0	796	MD15G1139900
MD15G1142500_1	Chr15:10539724|10540010	0	0	0	203.948	0	287	MD15G1142500
MD15G1144500_1	Chr15:10672590|10673164	0	0	0	101.974	0	574	MD15G1144500
n/a_1592	Chr15:10828682|10850557	0	0	0	51.1374	0	21875	n/a
n/a_1594	Chr15:10851353|10857329	0	0	0	1836.35	0	5976	n/a
MD15G1147200_1	Chr15:10937101|10937500	0	0	0	558.48	0	399	MD15G1147200
MD15G1152500_1	Chr15:11297466|11298297	0	0	0	89.3837	0	831	MD15G1152500
MD15G1155100_1	Chr15:11503123|11503292	0	0	0	692.7	0	169	MD15G1155100
n/a_1599	Chr15:11557745|11557918	0	0	0	338.342	0	173	n/a
MD15G1157600_1	Chr15:11686453|11695287	0	0	0	105.809	0	1404	MD15G1157600
MD15G1160800_1	Chr15:12026582|12027239	0	0	0	106.424	0	550	MD15G1160800
MD15G1160800_2	Chr15:12028168|12028351	0	0	0	403.684	0	184	MD15G1160800
MD15G1162600_1	Chr15:12251250|12251401	0	0	0	526.345	0	151	MD15G1162600
MD15G1022700_1	Chr15:1315685|1316044	0	0	0	891.335	0	250	MD15G1022700
MD15G1172700_1	Chr15:13456691|13456889	0	0	0	267.603	0	198	MD15G1172700
MD15G1177300_1	Chr15:13877288|13877438	0	0	0	585.332	0	150	MD15G1177300
MD15G1181400_1	Chr15:14404282|14405196	0	0	0	173.913	0	457	MD15G1181400
MD15G1188300_2	Chr15:14852913|14853665	0	0	0	496.842	0	299	MD15G1188300
MD15G1200900_1	Chr15:15975086|15975635	0	0	0	260.929	0	427	MD15G1200900
MD15G1203200_1	Chr15:16145163|16145330	0	0	0	700.996	0	167	MD15G1203200
MD15G1207500_1	Chr15:16491959|16493156	0	0	0	108.395	0	540	MD15G1207500
n/a_1563	Chr15:1730367|1774720	0	0	0	18.5168	0	44353	n/a
MD15G1224000_1	Chr15:18220387|18222143	0	0	0	61.6587	0	1289	MD15G1224000
MD15G1227600_1	Chr15:18503654|18503806	0	0	0	871.471	0	152	MD15G1227600
MD15G1242600_1	Chr15:19954894|19955336	0	0	0	298.639	0	196	MD15G1242600
MD15G1243400_1	Chr15:19989360|19989580	0	0	0	698.891	0	220	MD15G1243400
MD15G1244000_1	Chr15:20035572|20035741	0	0	0	470.285	0	169	MD15G1244000
MD15G1249200_3	Chr15:20800894|20801253	0	0	0	489.135	0	359	MD15G1249200
MD15G1249600_1	Chr15:20819389|20820085	0	0	0	126.149	0	696	MD15G1249600
MD15G1257500_2	Chr15:21904171|21904396	0	0	0	260.148	0	225	MD15G1257500
n/a_1609	Chr15:21962288|21962980	0	0	0	84.5855	0	692	n/a
MD15G1003900_1	Chr15:238196|238373	0	0	0	419.649	0	177	MD15G1003900
MD15G1275900_2	Chr15:24230164|24230680	0	0	0	113.436	0	516	MD15G1275900
n/a_1565	Chr15:2481338|2493691	0	0	0	736.586	0	12353	n/a
MD15G1004200_1	Chr15:251384|253475	0	0	0	73.9084	0	1005	MD15G1004200
MD15G1036400_1	Chr15:2541696|2541896	0	0	0	292.666	0	200	MD15G1036400
n/a_1615	Chr15:25917300|25917526	0	0	0	258.996	0	226	n/a
MD15G1037700_1	Chr15:2625409|2626302	0	0	0	101.444	0	577	MD15G1037700
MD15G1288100_1	Chr15:26539651|26540014	0	0	0	161.248	0	363	MD15G1288100
MD15G1291600_1	Chr15:26996857|26998176	0	0	0	1443.89	0	202	MD15G1291600
n/a_1616	Chr15:27580021|27580176	0	0	0	1198.03	0	155	n/a
MD15G1041900_1	Chr15:2929376|2930409	0	0	0	192.43	0	386	MD15G1041900
MD15G1042600_1	Chr15:2975077|2975348	0	0	0	647.969	0	271	MD15G1042600
n/a_1566	Chr15:2984746|2985019	0	0	0	1088.32	0	273	n/a
MD15G1043500_1	Chr15:3015634|3015804	0	0	0	3376.27	0	33	MD15G1043500
MD15G1309700_2	Chr15:31098902|31101261	0	0	0	140.48	0	625	MD15G1309700
MD15G1313400_3	Chr15:31704564|31705576	0	0	0	139.034	0	421	MD15G1313400
MD15G1317800_1	Chr15:32781325|32781484	0	0	0	333.242	0	159	MD15G1317800
n/a_1617	Chr15:33993469|34020271	0	0	0	8.89614	0	26802	n/a
MD15G1050100_1	Chr15:3411240|3412568	0	0	0	142.818	0	371	MD15G1050100
MD15G1006000_1	Chr15:341845|342361	0	0	0	427.919	0	329	MD15G1006000
MD15G1006000_2	Chr15:342034|342361	0	0	0	1113.97	0	224	MD15G1006000
MD15G1329300_1	Chr15:36268175|36268695	0	0	0	142.842	0	520	MD15G1329300
MD15G1330500_1	Chr15:36463302|36465901	0	0	0	155.881	0	751	MD15G1330500
MD15G1336800_2	Chr15:37781173|37781323	0	0	0	390.221	0	150	MD15G1336800
MD15G1339400_1	Chr15:38355722|38355986	0	0	0	200.702	0	264	MD15G1339400
MD15G1059100_1	Chr15:3945830|3945980	0	0	0	390.221	0	150	MD15G1059100
MD15G1347000_1	Chr15:41056595|41057586	0	0	0	179.415	0	414	MD15G1347000
MD15G1347000_2	Chr15:41056595|41057890	0	0	0	119.945	0	488	MD15G1347000
MD15G1353000_1	Chr15:42204687|42204889	0	0	0	735.425	0	202	MD15G1353000
MD15G1358700_1	Chr15:43256371|43256571	0	0	0	292.666	0	200	MD15G1358700
MD15G1361900_1	Chr15:43649605|43649798	0	0	0	454.921	0	193	MD15G1361900
MD15G1363000_1	Chr15:43832392|43832582	0	0	0	1078.24	0	190	MD15G1363000
MD15G1363500_1	Chr15:44053653|44054555	0	0	0	151.64	0	579	MD15G1363500
MD15G1365300_1	Chr15:44269321|44270601	0	0	0	395.095	0	188	MD15G1365300
MD15G1372700_2	Chr15:45524201|45525055	0	0	0	110.205	0	674	MD15G1372700
n/a_1568	Chr15:4625333|4625977	0	0	0	115.338	0	644	n/a
n/a_1630	Chr15:46430719|46453695	0	0	0	132.607	0	22976	n/a
n/a_1631	Chr15:46626694|46626914	0	0	0	399.09	0	220	n/a
MD15G1385000_4	Chr15:47561791|47561947	0	0	0	375.213	0	156	MD15G1385000
n/a_1633	Chr15:48569624|48570265	0	0	0	405.574	0	641	n/a
MD15G1072600_1	Chr15:4950306|4950504	0	0	0	295.622	0	198	MD15G1072600
MD15G1073000_1	Chr15:4976055|4976925	0	0	0	194.851	0	751	MD15G1073000
MD15G1403700_1	Chr15:50463415|50464108	0	0	0	281.89	0	527	MD15G1403700
MD15G1403800_1	Chr15:50467699|50468746	0	0	0	153.228	0	382	MD15G1403800
MD15G1404000_2	Chr15:50483950|50485040	0	0	0	190.595	0	278	MD15G1404000
MD15G1406000_1	Chr15:50669442|50669696	0	0	0	312.906	0	254	MD15G1406000
MD15G1406000_2	Chr15:50669918|50670155	0	0	0	223.567	0	237	MD15G1406000
MD15G1406000_3	Chr15:50669963|50670152	0	0	0	786.009	0	189	MD15G1406000
MD15G1411800_1	Chr15:51115826|51116041	0	0	0	246.444	0	215	MD15G1411800
MD15G1419900_1	Chr15:52145380|52146390	0	0	0	308.953	0	343	MD15G1419900
MD15G1422000_1	Chr15:52384601|52384755	0	0	0	723.486	0	154	MD15G1422000
MD15G1422000_2	Chr15:52387425|52388040	0	0	0	723.195	0	374	MD15G1422000
MD15G1423200_1	Chr15:52456155|52456605	0	0	0	544.559	0	341	MD15G1423200
n/a_1654	Chr15:52719548|52751954	0	0	0	2.2921	0	32406	n/a
n/a_1662	Chr15:53229790|53233422	0	0	0	62.9084	0	3632	n/a
MD15G1435900_1	Chr15:53620207|53620409	0	0	0	579.537	0	202	MD15G1435900
MD15G1439700_1	Chr15:53966261|53967245	0	0	0	119.618	0	734	MD15G1439700
MD15G1440000_1	Chr15:53991339|53992938	0	0	0	458.748	0	231	MD15G1440000
MD15G1079000_1	Chr15:5403099|5403366	0	0	0	725.733	0	267	MD15G1079000
MD15G1442200_1	Chr15:54266995|54267773	0	0	0	232.118	0	480	MD15G1442200
MD15G1442200_2	Chr15:54266995|54268165	0	0	0	464.534	0	525	MD15G1442200
MD15G1446000_1	Chr15:54921766|54923244	0	0	0	107.149	0	989	MD15G1446000
n/a_1570	Chr15:5911300|5919459	0	0	0	40.9671	0	8159	n/a
MD15G1089500_1	Chr15:6225628|6226286	0	0	0	185.914	0	285	MD15G1089500
MD15G1090600_1	Chr15:6282985|6283583	0	0	0	175.448	0	453	MD15G1090600
MD15G1098200_1	Chr15:6821189|6824023	0	0	0	81.0894	0	916	MD15G1098200
n/a_1574	Chr15:7309667|7321677	0	0	0	4.41178	0	12010	n/a
MD15G1013300_1	Chr15:731878|732239	0	0	0	308.069	0	285	MD15G1013300
MD15G1106500_1	Chr15:7450155|7450764	0	0	0	121.967	0	609	MD15G1106500
MD15G1113500_1	Chr15:7978099|7978256	0	0	0	745.646	0	157	MD15G1113500
MD15G1114900_1	Chr15:8104071|8105244	0	0	0	275.234	0	638	MD15G1114900
MD15G1114900_2	Chr15:8104879|8105101	0	0	0	596.683	0	222	MD15G1114900
MD15G1121100_1	Chr15:8701134|8702077	0	0	0	93.1069	0	943	MD15G1121100
MD15G1124700_1	Chr15:9048014|9048508	0	0	0	309.856	0	171	MD15G1124700
MD15G1126400_3	Chr15:9192815|9193704	0	0	0	187.228	0	283	MD15G1126400
MD15G1130500_1	Chr15:9432199|9432726	0	0	0	310.637	0	359	MD15G1130500
MD15G1130800_2	Chr15:9443953|9444373	0	0	0	393.944	0	269	MD15G1130800
n/a_1560	Chr15:952194|1045365	0	0	0	1.99305	0	93171	n/a
MD15G1133400_1	Chr15:9666573|9667422	0	0	0	229.993	0	509	MD15G1133400
MD15G1133400_4	Chr15:9672474|9672669	0	0	0	300.17	0	195	MD15G1133400
MD15G1134500_1	Chr15:9772787|9774092	0	0	0	95.8775	0	1221	MD15G1134500
n/a_1704	Chr16:10284906|10285065	0	0	0	666.483	0	159	n/a
MD16G1138000_1	Chr16:10567425|10567739	0	0	0	186.411	0	314	MD16G1138000
MD16G1141700_1	Chr16:10923027|10923185	0	0	0	370.463	0	158	MD16G1141700
MD16G1143100_1	Chr16:11007802|11008211	0	0	0	143.113	0	409	MD16G1143100
n/a_1712	Chr16:11310656|11382354	0	0	0	17.6117	0	71698	n/a
MD16G1148200_1	Chr16:11558512|11558690	0	0	0	657.676	0	178	MD16G1148200
MD16G1014900_1	Chr16:1166074|1166344	0	0	0	275.103	0	270	MD16G1014900
n/a_1715	Chr16:11758128|11771092	0	0	0	16.3485	0	12964	n/a
n/a_1716	Chr16:11994397|11999299	0	0	0	11.9407	0	4902	n/a
MD16G1017200_1	Chr16:1272123|1273964	0	0	0	60.5197	0	1841	MD16G1017200
MD16G1159400_1	Chr16:12893930|12894187	0	0	0	206.169	0	257	MD16G1159400
MD16G1161900_1	Chr16:13213140|13213439	0	0	0	420.095	0	209	MD16G1161900
MD16G1163100_1	Chr16:13358203|13358363	0	0	0	464.237	0	160	MD16G1163100
MD16G1167200_1	Chr16:13932952|13934250	0	0	0	432.511	0	406	MD16G1167200
MD16G1172200_1	Chr16:14493258|14493418	0	0	0	365.832	0	160	MD16G1172200
MD16G1020600_1	Chr16:1484909|1485062	0	0	0	346.31	0	153	MD16G1020600
MD16G1175400_1	Chr16:14885578|14887041	0	0	0	60.7631	0	872	MD16G1175400
MD16G1175900_2	Chr16:14917536|14918636	0	0	0	279.361	0	569	MD16G1175900
n/a_1726	Chr16:15889159|15889333	0	0	0	672.795	0	174	n/a
MD16G1186800_1	Chr16:16117873|16119059	0	0	0	252.074	0	442	MD16G1186800
MD16G1191300_1	Chr16:16846899|16847106	0	0	0	282.769	0	207	MD16G1191300
n/a_1731	Chr16:18930087|18975121	0	0	0	2.94141	0	45034	n/a
MD16G1026800_1	Chr16:1896545|1896737	0	0	0	275.966	0	192	MD16G1026800
MD16G1026800_2	Chr16:1896556|1896737	0	0	0	646.776	0	181	MD16G1026800
MD16G1223000_1	Chr16:22429742|22429906	0	0	0	679.371	0	164	MD16G1223000
MD16G1224400_1	Chr16:22657162|22657342	0	0	0	325.184	0	180	MD16G1224400
MD16G1036500_1	Chr16:2626491|2626642	0	0	0	969.093	0	151	MD16G1036500
MD16G1247900_3	Chr16:27697999|27698155	0	0	0	750.425	0	156	MD16G1247900
n/a_1743	Chr16:27940312|27940465	0	0	0	485.476	0	153	n/a
MD16G1251700_1	Chr16:28186910|28187112	0	0	0	367.712	0	202	MD16G1251700
MD16G1253800_1	Chr16:28887640|28889131	0	0	0	359.374	0	451	MD16G1253800
MD16G1254000_1	Chr16:28922723|28922910	0	0	0	313.012	0	187	MD16G1254000
MD16G1256000_1	Chr16:29518114|29518276	0	0	0	458.506	0	162	MD16G1256000
MD16G1259300_1	Chr16:31608700|31608885	0	0	0	286.408	0	185	MD16G1259300
n/a_1678	Chr16:3234949|3267682	0	0	0	11.331	0	32733	n/a
n/a_1679	Chr16:3234949|3267689	0	0	0	2.26872	0	32740	n/a
MD16G1265400_1	Chr16:33760337|33762528	0	0	0	382.876	0	194	MD16G1265400
MD16G1004600_1	Chr16:346650|347300	0	0	0	90.0511	0	650	MD16G1004600
MD16G1050000_1	Chr16:3527554|3527946	0	0	0	270.334	0	392	MD16G1050000
n/a_1744	Chr16:35428108|35428265	0	0	0	843.717	0	157	n/a
MD16G1272400_2	Chr16:35458197|35458447	0	0	0	594.223	0	250	MD16G1272400
MD16G1279500_1	Chr16:37993637|37997669	0	0	0	67.1552	0	789	MD16G1279500
MD16G1281300_1	Chr16:38365944|38366168	0	0	0	663.195	0	224	MD16G1281300
Apple_newGene_17957_2	Chr16:38914905|38915081	0	0	0	633.05	0	176	Apple_newGene_17957
Apple_newGene_17958_2	Chr16:38918788|38919064	0	0	0	269.123	0	276	Apple_newGene_17958
MD16G1287000_1	Chr16:41125811|41130427	0	0	0	107.493	0	691	MD16G1287000
MD16G1065800_1	Chr16:4612643|4612873	0	0	0	322.947	0	230	MD16G1065800
MD16G1078900_1	Chr16:5536947|5537135	0	0	0	622.693	0	188	MD16G1078900
MD16G1008000_2	Chr16:596629|596903	0	0	0	406.631	0	274	MD16G1008000
MD16G1090200_1	Chr16:6286155|6286309	0	0	0	482.324	0	154	MD16G1090200
n/a_1695	Chr16:6508942|6531653	0	0	0	44.862	0	22711	n/a
n/a_1697	Chr16:6512426|6548584	0	0	0	236.347	0	36158	n/a
MD16G1099600_1	Chr16:6935489|6935867	0	0	0	140.173	0	378	MD16G1099600
MD16G1100800_1	Chr16:6979855|6980017	0	0	0	327.07	0	162	MD16G1100800
MD16G1102300_1	Chr16:7154805|7154973	0	0	0	348.412	0	168	MD16G1102300
MD16G1103100_1	Chr16:7223858|7224095	0	0	0	740.926	0	237	MD16G1103100
MD16G1104400_1	Chr16:7310674|7310971	0	0	0	197.081	0	297	MD16G1104400
MD16G1106300_1	Chr16:7464873|7465551	0	0	0	146.369	0	362	MD16G1106300
MD16G1109600_2	Chr16:7705709|7706491	0	0	0	489.96	0	379	MD16G1109600
n/a_1699	Chr16:7713844|7714004	0	0	0	331.159	0	160	n/a
n/a_1700	Chr16:7823350|7823559	0	0	0	980.221	0	209	n/a
MD16G1120200_1	Chr16:8616104|8617142	0	0	0	250.677	0	467	MD16G1120200
MD16G1123100_1	Chr16:8889648|8890392	0	0	0	71.1214	0	745	MD16G1123100
MD16G1124000_1	Chr16:8957882|8958263	0	0	0	194.955	0	381	MD16G1124000
n/a_1798	Chr17:10639152|10687189	0	0	0	9.83757	0	48037	n/a
MD17G1129100_1	Chr17:11351638|11351890	0	0	0	294.754	0	252	MD17G1129100
MD17G1134800_4	Chr17:12082153|12082717	0	0	0	336.099	0	221	MD17G1134800
MD17G1001800_1	Chr17:122018|122225	0	0	0	282.769	0	207	MD17G1001800
MD17G1137000_1	Chr17:12261185|12261489	0	0	0	174.294	0	304	MD17G1137000
MD17G1139300_1	Chr17:12516130|12519845	0	0	0	26.2128	0	2233	MD17G1139300
MD17G1139600_1	Chr17:12554807|12555795	0	0	0	83.1779	0	893	MD17G1139600
MD17G1156400_1	Chr17:14975481|14976808	0	0	0	267.603	0	396	MD17G1156400
MD17G1156800_3	Chr17:15084044|15085879	0	0	0	97.579	0	543	MD17G1156800
MD17G1162500_1	Chr17:16075884|16076290	0	0	0	259.732	0	306	MD17G1162500
n/a_1753	Chr17:1621079|1625533	0	0	0	32.8543	0	4454	n/a
MD17G1022100_2	Chr17:1642241|1642401	0	0	0	464.237	0	160	MD17G1022100
MD17G1171200_1	Chr17:17627219|17627369	0	0	0	353.236	0	150	MD17G1171200
MD17G1027400_1	Chr17:1955699|1955870	0	0	0	434.374	0	171	MD17G1027400
MD17G1027400_9	Chr17:1970173|1970353	0	0	0	412.655	0	180	MD17G1027400
MD17G1027400_14	Chr17:1974934|1975120	0	0	0	399.344	0	186	MD17G1027400
MD17G1177700_1	Chr17:20311095|20314117	0	0	0	135.167	0	784	MD17G1177700
MD17G1178100_2	Chr17:20385817|20386690	0	0	0	188.56	0	562	MD17G1178100
MD17G1180500_1	Chr17:20968264|20968553	0	0	0	257.017	0	289	MD17G1180500
MD17G1180500_3	Chr17:20968498|20968648	0	0	0	529.854	0	150	MD17G1180500
MD17G1182800_1	Chr17:21497256|21498325	0	0	0	69.4835	0	1069	MD17G1182800
n/a_1810	Chr17:21566973|21568635	0	0	0	44.6919	0	1662	n/a
MD17G1184300_1	Chr17:21778505|21778672	0	0	0	444.778	0	167	MD17G1184300
MD17G1186000_1	Chr17:22111179|22112009	0	0	0	347.052	0	720	MD17G1186000
MD17G1030900_1	Chr17:2231349|2232768	0	0	0	147.439	0	397	MD17G1030900
MD17G1003100_1	Chr17:224835|226064	0	0	0	881.351	0	401	MD17G1003100
MD17G1189500_1	Chr17:22571304|22572076	0	0	0	96.2149	0	772	MD17G1189500
MD17G1191000_1	Chr17:22801160|22801739	0	0	0	233.578	0	477	MD17G1191000
MD17G1204400_1	Chr17:24754329|24756664	0	0	0	105.656	0	554	MD17G1204400
MD17G1215700_1	Chr17:26279581|26279889	0	0	0	241.162	0	308	MD17G1215700
MD17G1217000_2	Chr17:26385509|26392348	0	0	0	384.196	0	870	MD17G1217000
MD17G1230800_1	Chr17:27925914|27926651	0	0	0	304.514	0	174	MD17G1230800
n/a_1817	Chr17:28506171|28506415	0	0	0	304.418	0	244	n/a
n/a_1821	Chr17:28747966|28760545	0	0	0	4.21221	0	12579	n/a
MD17G1242500_1	Chr17:29157929|29159028	0	0	0	53.212	0	1100	MD17G1242500
MD17G1003300_1	Chr17:295638|296259	0	0	0	253.22	0	440	MD17G1003300
n/a_1822	Chr17:29681770|29695849	0	0	0	7.91369	0	14079	n/a
n/a_1826	Chr17:29681770|29701556	0	0	0	5.63109	0	19786	n/a
n/a_1750	Chr17:313818|313988	0	0	0	655.393	0	170	n/a
MD17G1262600_1	Chr17:32312823|32313044	0	0	0	719.259	0	221	MD17G1262600
MD17G1268600_1	Chr17:32830564|32832539	0	0	0	191.285	0	612	MD17G1268600
MD17G1271600_1	Chr17:33236467|33236647	0	0	0	294.363	0	180	MD17G1271600
n/a_1843	Chr17:33668625|33750365	0	0	0	0.972328	0	81740	n/a
MD17G1283400_1	Chr17:34253671|34253827	0	0	0	1190.35	0	156	MD17G1283400
MD17G1004000_1	Chr17:346230|346395	0	0	0	675.254	0	165	MD17G1004000
MD17G1048300_1	Chr17:3514848|3516211	0	0	0	101.311	0	523	MD17G1048300
MD17G1057300_1	Chr17:4686713|4686888	0	0	0	424.445	0	175	MD17G1057300
MD17G1007300_1	Chr17:483391|483560	0	0	0	470.285	0	169	MD17G1007300
MD17G1060400_1	Chr17:4908979|4909654	0	0	0	105.971	0	500	MD17G1060400
n/a_1769	Chr17:5112775|5184546	0	0	0	1.10738	0	71771	n/a
n/a_1770	Chr17:5113052|5169977	0	0	0	2.57063	0	56925	n/a
MD17G1066700_1	Chr17:5387753|5388001	0	0	0	464.237	0	160	MD17G1066700
MD17G1070600_1	Chr17:5698384|5698557	0	0	0	918.822	0	173	MD17G1070600
MD17G1010000_1	Chr17:618271|618741	0	0	0	181.457	0	292	MD17G1010000
n/a_1773	Chr17:6240839|6241593	0	0	0	116.445	0	754	n/a
MD17G1010400_1	Chr17:645316|645560	0	0	0	434.307	0	244	MD17G1010400
MD17G1081400_2	Chr17:6801600|6804751	0	0	0	32.2688	0	1642	MD17G1081400
MD17G1085700_1	Chr17:7030447|7030598	0	0	0	581.456	0	151	MD17G1085700
MD17G1099500_1	Chr17:8453270|8453446	0	0	0	633.05	0	176	MD17G1099500
n/a_1784	Chr17:8467374|8515771	0	0	0	2.30214	0	48397	n/a
n/a_1785	Chr17:8514795|8525893	0	0	0	7.16148	0	11098	n/a
MD17G1001400_3	Chr17:85414|85753	0	0	0	547.772	0	339	MD17G1001400
MD17G1108500_2	Chr17:9310932|9311178	0	0	0	301.943	0	246	MD17G1108500
n/a_1787	Chr17:9334238|9341255	0	0	0	29.1957	0	7017	n/a
MD17G1110200_13	Chr17:9498793|9499027	0	0	0	250.142	0	234	MD17G1110200
MD17G1110200_16	Chr17:9498796|9499060	0	0	0	221.717	0	264	MD17G1110200
MD17G1110200_25	Chr17:9499024|9499201	0	0	0	330.696	0	177	MD17G1110200
MD17G1113200_1	Chr17:9691248|9692410	0	0	0	72.6823	0	729	MD17G1113200

## Sheet: Table S7-3
Table S7-3 Expression of circRNAs in phloem only
New_ID	circRNA_ID	Flower	Phloem	Leaf	Root	Fruit	geneLength	gene_id
MD00G1055300_1	Chr00:10344721|10349918	0	131.004	0	0	0	1086	MD00G1055300
MD00G1058900_1	Chr00:10720729|10720977	0	344.568	0	0	0	248	MD00G1058900
MD00G1060900_1	Chr00:11239729|11239882	0	372.344	0	0	0	153	MD00G1060900
MD00G1063900_3	Chr00:11973185|11973770	0	172.947	0	0	0	447	MD00G1063900
MD00G1063900_4	Chr00:11973702|11974168	0	345.264	0	0	0	165	MD00G1063900
MD00G1066600_1	Chr00:12851770|12851984	0	361.25	0	0	0	214	MD00G1066600
MD00G1070400_1	Chr00:13699944|13700103	0	358.293	0	0	0	159	MD00G1070400
n/a_4	Chr00:1459640|1469268	0	13.9464	0	0	0	9628	n/a
MD00G1078400_1	Chr00:15611952|15612116	0	578.333	0	0	0	164	MD00G1078400
MD00G1078900_1	Chr00:15875653|15877593	0	58.7305	0	0	0	1940	MD00G1078900
MD00G1084600_1	Chr00:16961099|16961276	0	803.785	0	0	0	177	MD00G1084600
MD00G1089600_1	Chr00:18497750|18497914	0	347.37	0	0	0	164	MD00G1089600
n/a_25	Chr00:19490215|19490389	0	545.095	0	0	0	174	n/a
MD00G1107200_1	Chr00:22465235|22466808	0	195.158	0	0	0	486	MD00G1107200
n/a_5	Chr00:2400097|2400256	0	486.21	0	0	0	159	n/a
MD00G1016700_1	Chr00:2412082|2412712	0	327.574	0	0	0	236	MD00G1016700
MD00G1113700_1	Chr00:24122593|24122773	0	429.486	0	0	0	180	MD00G1113700
MD00G1138200_1	Chr00:29898191|29898378	0	826.818	0	0	0	187	MD00G1138200
MD00G1018600_1	Chr00:3145137|3146084	0	474.738	0	0	0	180	MD00G1018600
MD00G1148100_3	Chr00:32476084|32478651	0	193.17	0	0	0	491	MD00G1148100
MD00G1020700_2	Chr00:3733245|3733458	0	445.289	0	0	0	213	MD00G1020700
MD00G1169600_1	Chr00:38982278|38983310	0	83.2875	0	0	0	684	MD00G1169600
MD00G1024700_1	Chr00:4002513|4005321	0	376.713	0	0	0	403	MD00G1024700
MD00G1181800_1	Chr00:42827476|42830904	0	24.9279	0	0	0	3428	MD00G1181800
MD00G1207300_1	Chr00:50458685|50459044	0	322.464	0	0	0	265	MD00G1207300
MD00G1031700_1	Chr00:5528738|5528892	0	369.926	0	0	0	154	MD00G1031700
MD00G1037100_1	Chr00:6584107|6584306	0	572.549	0	0	0	199	MD00G1037100
n/a_17	Chr00:6748225|6748456	0	821.183	0	0	0	231	n/a
MD00G1051300_1	Chr00:9677591|9679012	0	161.731	0	0	0	717	MD00G1051300
MD00G1006900_1	Chr00:981856|983693	0	146.416	0	0	0	1056	MD00G1006900
MD01G1028300_1	Chr01:10494187|10494356	0	335.11	0	0	0	170	MD01G1028300
MD01G1034300_1	Chr01:11709586|11709901	0	245.42	0	0	0	315	MD01G1034300
MD01G1036200_1	Chr01:12168121|12168275	0	554.889	0	0	0	154	MD01G1036200
MD01G1036200_2	Chr01:12168121|12168298	0	321.857	0	0	0	177	MD01G1036200
MD01G1037000_1	Chr01:12395894|12396272	0	290.629	0	0	0	266	MD01G1037000
MD01G1038800_1	Chr01:13454860|13457141	0	188.862	0	0	0	614	MD01G1038800
MD01G1045300_1	Chr01:14546523|14547364	0	125.499	0	0	0	616	MD01G1045300
MD01G1051100_2	Chr01:15474650|15474807	0	360.561	0	0	0	158	MD01G1051100
n/a_39	Chr01:16628566|16665077	0	1.56031	0	0	0	36511	n/a
MD01G1065800_1	Chr01:16971280|16971744	0	249.379	0	0	0	465	MD01G1065800
MD01G1069400_1	Chr01:17348683|17349390	0	80.578	0	0	0	707	MD01G1069400
MD01G1069600_1	Chr01:17367623|17370893	0	60.7286	0	0	0	1273	MD01G1069600
n/a_41	Chr01:18439238|18443002	0	811.276	0	0	0	3764	n/a
MD01G1083400_1	Chr01:18987139|18987443	0	254.301	0	0	0	304	MD01G1083400
Apple_newGene_776_1	Chr01:19280023|19280206	0	633.668	0	0	0	183	Apple_newGene_776
MD01G1087600_1	Chr01:19699645|19700782	0	169.571	0	0	0	839	MD01G1087600
n/a_48	Chr01:20689523|20694912	0	15.8569	0	0	0	5389	n/a
n/a_52	Chr01:20780434|20878427	0	1.16271	0	0	0	97993	n/a
MD01G1094400_1	Chr01:20917074|20917362	0	989.039	0	0	0	288	MD01G1094400
n/a_61	Chr01:21417829|21424904	0	8.0521	0	0	0	7075	n/a
MD01G1109700_1	Chr01:22233533|22234041	0	198.734	0	0	0	389	MD01G1109700
MD01G1135400_1	Chr01:24459639|24460343	0	138.61	0	0	0	411	MD01G1135400
MD01G1135400_2	Chr01:24459639|24460348	0	273.231	0	0	0	417	MD01G1135400
MD01G1136700_1	Chr01:24595207|24595454	0	575.992	0	0	0	247	MD01G1136700
MD01G1144400_1	Chr01:25478906|25479384	0	161.731	0	0	0	478	MD01G1144400
MD01G1147200_1	Chr01:25633419|25634022	0	94.4753	0	0	0	603	MD01G1147200
MD01G1153400_2	Chr01:26180083|26180327	0	233.478	0	0	0	244	MD01G1153400
MD01G1154700_1	Chr01:26296434|26296754	0	178.027	0	0	0	320	MD01G1154700
MD01G1154700_2	Chr01:26302807|26303822	0	101.368	0	0	0	843	MD01G1154700
MD01G1155100_1	Chr01:26319600|26319825	0	253.194	0	0	0	225	MD01G1155100
n/a_75	Chr01:26714328|26723516	0	16.8279	0	0	0	9188	n/a
MD01G1162300_1	Chr01:26722819|26723161	0	166.575	0	0	0	342	MD01G1162300
MD01G1165200_1	Chr01:26930912|26931077	0	345.264	0	0	0	165	MD01G1165200
MD01G1165900_2	Chr01:26990388|26991110	0	265.925	0	0	0	535	MD01G1165900
n/a_80	Chr01:27382002|27388581	0	324.534	0	0	0	6579	n/a
MD01G1173400_1	Chr01:27510806|27511033	0	505.277	0	0	0	153	MD01G1173400
MD01G1174400_1	Chr01:27558704|27558955	0	632.985	0	0	0	135	MD01G1174400
n/a_82	Chr01:27753167|27753327	0	483.172	0	0	0	160	n/a
n/a_93	Chr01:28609776|28609952	0	323.685	0	0	0	176	n/a
MD01G1191000_1	Chr01:28939674|28939912	0	974.464	0	0	0	238	MD01G1191000
MD01G1192300_1	Chr01:29163641|29164404	0	232.525	0	0	0	490	MD01G1192300
MD01G1195200_1	Chr01:29360142|29360321	0	431.885	0	0	0	179	MD01G1195200
MD01G1196700_2	Chr01:29460967|29461225	0	367.622	0	0	0	258	MD01G1196700
MD01G1200700_1	Chr01:29740029|29740194	0	468.53	0	0	0	165	MD01G1200700
MD01G1213600_1	Chr01:30682493|30683007	0	254.964	0	0	0	372	MD01G1213600
MD01G1219500_1	Chr01:31174380|31174943	0	310.472	0	0	0	249	MD01G1219500
MD01G1219900_1	Chr01:31228280|31228590	0	305.957	0	0	0	310	MD01G1219900
n/a_105	Chr01:31423006|31443081	0	5.7764	0	0	0	20075	n/a
MD01G1229500_2	Chr01:31880684|31883118	0	24.7582	0	0	0	2301	MD01G1229500
MD01G1236300_1	Chr01:32378182|32378502	0	178.027	0	0	0	320	MD01G1236300
MD01G1001600_3	Chr01:758322|758502	0	474.738	0	0	0	180	MD01G1001600
MD02G1124600_1	Chr02:10143354|10143634	0	338.738	0	0	0	280	MD02G1124600
n/a_238	Chr02:12203360|12210314	0	272.366	0	0	0	6954	n/a
n/a_244	Chr02:12205065|12219238	0	23.4222	0	0	0	14173	n/a
MD02G1149400_1	Chr02:12306114|12309924	0	72.3852	0	0	0	1602	MD02G1149400
MD02G1151300_1	Chr02:12483097|12483310	0	890.578	0	0	0	213	MD02G1151300
MD02G1157800_1	Chr02:13190127|13190367	0	322.114	0	0	0	240	MD02G1157800
MD02G1161000_1	Chr02:13499041|13500012	0	89.5733	0	0	0	636	MD02G1161000
MD02G1161700_1	Chr02:13581506|13583167	0	34.2978	0	0	0	1661	MD02G1161700
n/a_250	Chr02:14085323|14115564	0	46.2858	0	0	0	30241	n/a
MD02G1020100_2	Chr02:1439769|1439922	0	558.516	0	0	0	153	MD02G1020100
MD02G1168400_4	Chr02:14452997|14453425	0	322.114	0	0	0	240	MD02G1168400
MD02G1172600_1	Chr02:15077407|15077570	0	581.881	0	0	0	163	MD02G1172600
n/a_134	Chr02:1539768|1550117	0	11.0095	0	0	0	10349	n/a
MD02G1023100_1	Chr02:1608882|1609097	0	539.354	0	0	0	215	MD02G1023100
MD02G1188800_1	Chr02:17253782|17253960	0	532.846	0	0	0	178	MD02G1188800
MD02G1195100_1	Chr02:18673275|18673669	0	214.168	0	0	0	266	MD02G1195100
MD02G1195400_1	Chr02:18715703|18715957	0	223.406	0	0	0	255	MD02G1195400
MD02G1203100_1	Chr02:20212691|20212843	0	1017.2	0	0	0	152	MD02G1203100
MD02G1207800_1	Chr02:21016661|21016964	0	382.71	0	0	0	303	MD02G1207800
MD02G1212400_1	Chr02:22761231|22761455	0	423.422	0	0	0	224	MD02G1212400
MD02G1216600_1	Chr02:24765414|24765576	0	7025.26	0	0	0	162	MD02G1216600
MD02G1232400_1	Chr02:27856886|27857079	0	400.557	0	0	0	193	MD02G1232400
MD02G1241400_1	Chr02:29013944|29014721	0	235.408	0	0	0	363	MD02G1241400
MD02G1241600_1	Chr02:29028663|29029810	0	102.648	0	0	0	924	MD02G1241600
MD02G1244400_1	Chr02:29432315|29432578	0	216.611	0	0	0	263	MD02G1244400
MD02G1244400_2	Chr02:29432462|29434615	0	141.072	0	0	0	548	MD02G1244400
MD02G1245100_1	Chr02:29510241|29510432	0	298.265	0	0	0	191	MD02G1245100
MD02G1248400_1	Chr02:29926560|29930075	0	215.56	0	0	0	660	MD02G1248400
n/a_272	Chr02:31015335|31015787	0	171.034	0	0	0	452	n/a
MD02G1000900_1	Chr02:31705|33513	0	67.18	0	0	0	848	MD02G1000900
MD02G1263300_1	Chr02:31763737|31764280	0	1104.04	0	0	0	258	MD02G1263300
MD02G1265200_1	Chr02:31952517|31952714	0	289.181	0	0	0	197	MD02G1265200
MD02G1277900_1	Chr02:33371587|33371818	0	246.617	0	0	0	231	MD02G1277900
n/a_296	Chr02:34262730|34269394	0	14.2327	0	0	0	6664	n/a
n/a_297	Chr02:34293411|34326406	0	4.31186	0	0	0	32995	n/a
MD02G1286900_1	Chr02:34371378|34371604	0	419.675	0	0	0	226	MD02G1286900
MD02G1289200_1	Chr02:34543378|34543556	0	960.145	0	0	0	178	MD02G1289200
n/a_311	Chr02:35690968|35783690	0	0.614402	0	0	0	92722	n/a
n/a_315	Chr02:35974291|35976165	0	91.1984	0	0	0	1874	n/a
MD02G1308300_1	Chr02:36354777|36354985	0	455.993	0	0	0	208	MD02G1308300
MD02G1309200_1	Chr02:36450443|36450701	0	299.641	0	0	0	258	MD02G1309200
n/a_317	Chr02:36543404|36590142	0	3.4824	0	0	0	46738	n/a
n/a_318	Chr02:36743208|36772318	0	1.95701	0	0	0	29110	n/a
MD02G1048800_1	Chr02:3842279|3842986	0	143.498	0	0	0	397	MD02G1048800
MD02G1048800_4	Chr02:3843470|3843625	0	748.137	0	0	0	155	MD02G1048800
n/a_148	Chr02:3896514|3905509	0	9.50005	0	0	0	8995	n/a
n/a_153	Chr02:3910905|3919538	0	44.5399	0	0	0	8633	n/a
Apple_newGene_21821_6	Chr02:4369355|4467533	0	10.169	0	0	0	9327	Apple_newGene_21821
n/a_155	Chr02:4890589|4915471	0	3.81186	0	0	0	24882	n/a
n/a_156	Chr02:5205455|5233799	0	16.1179	0	0	0	28344	n/a
n/a_157	Chr02:5209514|5241259	0	4.48165	0	0	0	31745	n/a
MD02G1008400_1	Chr02:541396|541753	0	159.13	0	0	0	358	MD02G1008400
n/a_162	Chr02:5496174|5501564	0	31.708	0	0	0	5390	n/a
n/a_121	Chr02:558666|562968	0	26.9552	0	0	0	4302	n/a
n/a_166	Chr02:5667447|5760178	0	1.84303	0	0	0	92731	n/a
n/a_169	Chr02:5668987|5760828	0	1.46205	0	0	0	91841	n/a
n/a_172	Chr02:5677202|5748000	0	63.3972	0	0	0	70798	n/a
n/a_177	Chr02:5733448|5772576	0	1.45596	0	0	0	39128	n/a
Apple_newGene_21981_5	Chr02:5805211|5825377	0	602.607	0	0	0	3213	Apple_newGene_21981
Apple_newGene_21981_9	Chr02:5899714|5904809	0	195.715	0	0	0	1975	Apple_newGene_21981
Apple_newGene_21981_12	Chr02:5901302|5905667	0	6950.72	0	0	0	1881	Apple_newGene_21981
MD02G1073500_1	Chr02:5909554|5910013	0	206.637	0	0	0	459	MD02G1073500
MD02G1009600_1	Chr02:640450|640611	0	589.109	0	0	0	161	MD02G1009600
n/a_114	Chr02:7006|10489	0	24.5343	0	0	0	3483	n/a
MD02G1090200_1	Chr02:7154426|7154636	0	271.279	0	0	0	210	MD02G1090200
n/a_192	Chr02:7314511|7411893	0	0.973964	0	0	0	97382	n/a
MD02G1096600_1	Chr02:7630580|7630870	0	493.993	0	0	0	192	MD02G1096600
MD02G1106300_1	Chr02:8609774|8610063	0	197.123	0	0	0	289	MD02G1106300
MD02G1110500_1	Chr02:8989466|8989696	0	618.565	0	0	0	230	MD02G1110500
MD02G1115100_1	Chr02:9355656|9355854	0	479.023	0	0	0	198	MD02G1115100
MD02G1118500_1	Chr02:9613299|9615517	0	141.948	0	0	0	602	MD02G1118500
MD02G1119100_1	Chr02:9656930|9659544	0	46.9651	0	0	0	1213	MD02G1119100
MD02G1119100_6	Chr02:9658869|9659544	0	284.54	0	0	0	500	MD02G1119100
MD02G1121800_1	Chr02:9920525|9920678	0	744.688	0	0	0	153	MD02G1121800
MD02G1122500_1	Chr02:9965287|9965446	0	358.293	0	0	0	159	MD02G1122500
n/a_326	Chr03:1030036|1094488	0	0.883892	0	0	0	64452	n/a
MD03G1117300_1	Chr03:10559573|10559804	0	334.664	0	0	0	231	MD03G1117300
MD03G1118200_1	Chr03:10690092|10690386	0	788.851	0	0	0	294	MD03G1118200
MD03G1125200_2	Chr03:11818365|11818524	0	596.52	0	0	0	159	MD03G1125200
MD03G1127000_1	Chr03:12188663|12188958	0	255.465	0	0	0	223	MD03G1127000
n/a_330	Chr03:1226434|1257347	0	3.68574	0	0	0	30913	n/a
MD03G1015400_1	Chr03:1227295|1228996	0	228.946	0	0	0	1013	MD03G1015400
MD03G1131700_1	Chr03:13003019|13003275	0	222.534	0	0	0	256	MD03G1131700
n/a_336	Chr03:1377274|1443567	0	1.28902	0	0	0	66293	n/a
n/a_340	Chr03:2040880|2078717	0	8.60324	0	0	0	37837	n/a
MD03G1002900_1	Chr03:214354|214583	0	414.177	0	0	0	229	MD03G1002900
MD03G1027100_1	Chr03:2183806|2183975	0	505.639	0	0	0	169	MD03G1027100
MD03G1168800_2	Chr03:22816509|22816796	0	296.712	0	0	0	288	MD03G1168800
MD03G1170900_1	Chr03:23211186|23212385	0	216.545	0	0	0	438	MD03G1170900
MD03G1171100_1	Chr03:23222244|23231334	0	35.2459	0	0	0	2691	MD03G1171100
n/a_409	Chr03:23226635|23260799	0	2.50126	0	0	0	34164	n/a
MD03G1172300_1	Chr03:23501249|23502775	0	57.6022	0	0	0	989	MD03G1172300
n/a_413	Chr03:23505054|23505855	0	106.683	0	0	0	801	n/a
MD03G1172500_1	Chr03:23527220|23533097	0	100.269	0	0	0	771	MD03G1172500
n/a_415	Chr03:23797764|23797971	0	458.196	0	0	0	207	n/a
MD03G1176600_1	Chr03:24231648|24231824	0	323.685	0	0	0	176	MD03G1176600
n/a_418	Chr03:24828369|24914226	0	0.663529	0	0	0	85857	n/a
MD03G1183500_1	Chr03:25033954|25035151	0	171.513	0	0	0	553	MD03G1183500
MD03G1003500_1	Chr03:252883|253081	0	1366.55	0	0	0	198	MD03G1003500
MD03G1003500_2	Chr03:252891|253066	0	662.635	0	0	0	175	MD03G1003500
MD03G1003500_3	Chr03:253229|253821	0	240.577	0	0	0	592	MD03G1003500
MD03G1003500_4	Chr03:255562|255752	0	406.881	0	0	0	190	MD03G1003500
Apple_newGene_27815_1	Chr03:25744121|25744286	0	468.53	0	0	0	165	Apple_newGene_27815
MD03G1191000_1	Chr03:26264010|26264178	0	508.648	0	0	0	168	MD03G1191000
n/a_353	Chr03:2640942|2700345	0	0.959019	0	0	0	59403	n/a
MD03G1003600_1	Chr03:269584|270184	0	316.155	0	0	0	600	MD03G1003600
MD03G1203500_1	Chr03:27827613|27827822	0	680.717	0	0	0	209	MD03G1203500
MD03G1203900_1	Chr03:27853883|27854227	0	224.731	0	0	0	344	MD03G1203900
MD03G1205600_1	Chr03:28152596|28153609	0	139.892	0	0	0	678	MD03G1205600
MD03G1208900_1	Chr03:28806989|28807150	0	1767.33	0	0	0	161	MD03G1208900
MD03G1036600_1	Chr03:2908131|2908356	0	343.589	0	0	0	225	MD03G1036600
MD03G1216700_1	Chr03:30097301|30097487	0	306.283	0	0	0	186	MD03G1216700
MD03G1217200_1	Chr03:30143960|30145716	0	127.447	0	0	0	447	MD03G1217200
MD03G1218200_1	Chr03:30262089|30262323	0	405.327	0	0	0	234	MD03G1218200
MD03G1219600_1	Chr03:30419060|30419472	0	138.273	0	0	0	412	MD03G1219600
MD03G1219900_1	Chr03:30432411|30434545	0	60.2843	0	0	0	945	MD03G1219900
MD03G1222300_1	Chr03:30655337|30655859	0	222.534	0	0	0	256	MD03G1222300
MD03G1039400_1	Chr03:3135233|3135416	0	311.304	0	0	0	183	MD03G1039400
MD03G1241500_1	Chr03:32654334|32654497	0	1056.16	0	0	0	163	MD03G1241500
n/a_438	Chr03:33130434|33153351	0	10.3468	0	0	0	22917	n/a
MD03G1246300_1	Chr03:33333077|33336884	0	70.9399	0	0	0	1337	MD03G1246300
n/a_445	Chr03:34614725|34618803	0	34.8872	0	0	0	4078	n/a
MD03G1263200_1	Chr03:34903057|34903242	0	835.756	0	0	0	185	MD03G1263200
MD03G1044400_1	Chr03:3513088|3513295	0	275.211	0	0	0	207	MD03G1044400
MD03G1282000_1	Chr03:36264193|36264395	0	469.538	0	0	0	202	MD03G1282000
n/a_464	Chr03:36760535|36766408	0	52.6528	0	0	0	5873	n/a
n/a_465	Chr03:36762870|36779189	0	4.73727	0	0	0	16319	n/a
n/a_468	Chr03:36800734|36808778	0	38.4423	0	0	0	8044	n/a
MD03G1047100_1	Chr03:3796429|3796801	0	207.259	0	0	0	373	MD03G1047100
MD03G1052500_1	Chr03:4189564|4190719	0	93.3912	0	0	0	610	MD03G1052500
MD03G1068500_2	Chr03:5569021|5569192	0	333.15	0	0	0	171	MD03G1068500
MD03G1071900_1	Chr03:5852817|5854289	0	117.968	0	0	0	804	MD03G1071900
MD03G1007400_1	Chr03:591734|592805	0	78.0095	0	0	0	991	MD03G1007400
n/a_381	Chr03:6404587|6410058	0	395.651	0	0	0	5471	n/a
MD03G1079900_1	Chr03:6440598|6440792	0	488.9	0	0	0	194	MD03G1079900
n/a_383	Chr03:6519061|6528978	0	37.6695	0	0	0	9917	n/a
n/a_322	Chr03:664018|759770	0	3.96218	0	0	0	95752	n/a
n/a_384	Chr03:6938165|6983820	0	438.29	0	0	0	45655	n/a
n/a_325	Chr03:761985|787761	0	12.8788	0	0	0	25776	n/a
MD03G1092700_1	Chr03:7764353|7764724	0	280.099	0	0	0	276	MD03G1092700
MD03G1096200_1	Chr03:8146490|8146744	0	758.773	0	0	0	125	MD03G1096200
MD03G1096800_1	Chr03:8331763|8331961	0	390.442	0	0	0	198	MD03G1096800
n/a_388	Chr03:9398433|9408768	0	9.17722	0	0	0	10335	n/a
n/a_392	Chr03:9949026|9958442	0	9.07529	0	0	0	9416	n/a
MD04G1009500_1	Chr04:1097067|1097260	0	491.433	0	0	0	193	MD04G1009500
n/a_477	Chr04:1102601|1108279	0	10.0332	0	0	0	5678	n/a
MD04G1080700_1	Chr04:11147973|11148714	0	401.892	0	0	0	472	MD04G1080700
MD04G1083900_1	Chr04:12183028|12184429	0	150.112	0	0	0	515	MD04G1083900
MD04G1085600_1	Chr04:12404891|12405076	0	307.938	0	0	0	185	MD04G1085600
MD04G1012800_5	Chr04:1432829|1432979	0	379.791	0	0	0	150	MD04G1012800
MD04G1001100_2	Chr04:146071|146237	0	343.184	0	0	0	166	MD04G1001100
MD04G1013100_1	Chr04:1498242|1500010	0	106.778	0	0	0	1086	MD04G1013100
n/a_513	Chr04:18657155|18657462	0	556.697	0	0	0	307	n/a
MD04G1100900_5	Chr04:18657182|18657340	0	489.288	0	0	0	158	MD04G1100900
MD04G1117400_1	Chr04:20261848|20262051	0	934.449	0	0	0	203	MD04G1117400
MD04G1121200_2	Chr04:20748463|20748613	0	569.686	0	0	0	150	MD04G1121200
MD04G1125600_1	Chr04:21212787|21213209	0	183.193	0	0	0	422	MD04G1125600
MD04G1126500_1	Chr04:21254469|21254679	0	406.919	0	0	0	210	MD04G1126500
MD04G1130900_1	Chr04:21788488|21790208	0	71.1219	0	0	0	801	MD04G1130900
MD04G1018900_1	Chr04:2179259|2180246	0	352.59	0	0	0	269	MD04G1018900
MD04G1136900_1	Chr04:22448064|22448308	0	316.834	0	0	0	244	MD04G1136900
MD04G1143700_1	Chr04:23286405|23286612	0	275.211	0	0	0	207	MD04G1143700
n/a_521	Chr04:23379254|23379466	0	447.39	0	0	0	212	n/a
MD04G1150900_1	Chr04:23970875|23971025	0	515.383	0	0	0	150	MD04G1150900
MD04G1164200_1	Chr04:25505154|25506769	0	239.342	0	0	0	323	MD04G1164200
MD04G1168300_1	Chr04:25835082|25835269	0	304.645	0	0	0	187	MD04G1168300
MD04G1169600_1	Chr04:26024820|26025980	0	316.155	0	0	0	300	MD04G1169600
MD04G1185100_1	Chr04:27631365|27631621	0	452.973	0	0	0	256	MD04G1185100
n/a_530	Chr04:27727857|27742891	0	5.14217	0	0	0	15034	n/a
MD04G1187900_2	Chr04:27834370|27834618	0	457.579	0	0	0	249	MD04G1187900
MD04G1194100_3	Chr04:28354538|28354697	0	895.733	0	0	0	159	MD04G1194100
MD04G1194100_4	Chr04:28354824|28355007	0	422.445	0	0	0	183	MD04G1194100
MD04G1194200_3	Chr04:28363311|28363620	0	256.615	0	0	0	222	MD04G1194200
n/a_539	Chr04:28733480|28734138	0	234.977	0	0	0	658	n/a
n/a_542	Chr04:29050491|29078133	0	34.9592	0	0	0	27642	n/a
MD04G1002300_2	Chr04:291738|297720	0	36.9926	0	0	0	1540	MD04G1002300
MD04G1213400_1	Chr04:29711366|29711530	0	521.054	0	0	0	164	MD04G1213400
MD04G1025900_2	Chr04:3025811|3026200	0	506.934	0	0	0	305	MD04G1025900
n/a_487	Chr04:3096853|3140035	0	18.6104	0	0	0	43182	n/a
n/a_489	Chr04:3097166|3140929	0	7.00204	0	0	0	43763	n/a
MD04G1229500_1	Chr04:30975092|30975694	0	189.265	0	0	0	602	MD04G1229500
MD04G1232200_2	Chr04:31141108|31142254	0	262.356	0	0	0	442	MD04G1232200
n/a_492	Chr04:3114414|3148842	0	4.13239	0	0	0	34428	n/a
MD04G1232600_1	Chr04:31177467|31178561	0	503.432	0	0	0	471	MD04G1232600
MD04G1241600_1	Chr04:31869646|31869796	0	1139.37	0	0	0	150	MD04G1241600
MD04G1241700_1	Chr04:31870621|31871517	0	109.555	0	0	0	520	MD04G1241700
MD04G1244500_1	Chr04:32065428|32065724	0	577.385	0	0	0	296	MD04G1244500
MD04G1030300_1	Chr04:3412096|3412285	0	1161.78	0	0	0	189	MD04G1030300
MD04G1033900_1	Chr04:3810317|3810682	0	378.958	0	0	0	204	MD04G1033900
n/a_495	Chr04:3879583|3961011	0	1.16479	0	0	0	81428	n/a
MD04G1037200_2	Chr04:4155914|4156064	0	379.791	0	0	0	150	MD04G1037200
n/a_473	Chr04:439393|501213	0	131.93	0	0	0	61820	n/a
MD04G1003000_1	Chr04:440128|440399	0	209.443	0	0	0	272	MD04G1003000
MD04G1042800_1	Chr04:5040957|5042053	0	278.143	0	0	0	341	MD04G1042800
MD04G1043700_2	Chr04:5144193|5145201	0	94.0939	0	0	0	1008	MD04G1043700
MD04G1003800_1	Chr04:533458|533948	0	450.701	0	0	0	316	MD04G1003800
MD04G1047500_1	Chr04:5539885|5540078	0	400.557	0	0	0	193	MD04G1047500
MD04G1004800_2	Chr04:608207|609030	0	144.224	0	0	0	395	MD04G1004800
n/a_507	Chr04:6772463|6803421	0	6.50604	0	0	0	30958	n/a
MD04G1006300_1	Chr04:723812|724997	0	98.7895	0	0	0	865	MD04G1006300
MD04G1062800_2	Chr04:8264470|8267516	0	47.457	0	0	0	1629	MD04G1062800
MD04G1062800_3	Chr04:8264683|8264890	0	687.294	0	0	0	207	MD04G1062800
MD04G1007900_2	Chr04:894582|894751	0	1122.44	0	0	0	169	MD04G1007900
MD04G1066700_1	Chr04:8991695|8991885	0	486.911	0	0	0	117	MD04G1066700
MD04G1070200_1	Chr04:9590916|9595457	0	168.766	0	0	0	562	MD04G1070200
n/a_561	Chr05:10992046|10992243	0	289.181	0	0	0	197	n/a
MD05G1071900_1	Chr05:15150035|15150281	0	230.642	0	0	0	247	MD05G1071900
MD05G1074600_1	Chr05:15867678|15869470	0	100.686	0	0	0	942	MD05G1074600
MD05G1074600_2	Chr05:15867678|15869644	0	102.094	0	0	0	1116	MD05G1074600
MD05G1082600_1	Chr05:17268073|17268241	0	339.099	0	0	0	168	MD05G1082600
MD05G1083900_1	Chr05:17486772|17487723	0	275.477	0	0	0	517	MD05G1083900
MD05G1008600_2	Chr05:1858614|1858819	0	277.896	0	0	0	205	MD05G1008600
MD05G1093300_1	Chr05:19797819|19798005	0	415.631	0	0	0	186	MD05G1093300
MD05G1094500_1	Chr05:20040078|20040229	0	511.97	0	0	0	151	MD05G1094500
MD05G1094500_2	Chr05:20040414|20040595	0	427.113	0	0	0	181	MD05G1094500
n/a_567	Chr05:21821886|21853409	0	4.90483	0	0	0	31523	n/a
MD05G1107800_1	Chr05:22109553|22109757	0	279.258	0	0	0	204	MD05G1107800
MD05G1107800_2	Chr05:22109666|22127389	0	47.2815	0	0	0	2006	MD05G1107800
n/a_569	Chr05:22688804|22689051	0	383.994	0	0	0	247	n/a
Apple_newGene_34947_1	Chr05:24511087|24511317	0	504.179	0	0	0	230	Apple_newGene_34947
n/a_574	Chr05:24824927|24877520	0	2.1664	0	0	0	52593	n/a
MD05G1128900_1	Chr05:25268470|25268782	0	365.183	0	0	0	312	MD05G1128900
n/a_576	Chr05:25847925|25848442	0	110.191	0	0	0	517	n/a
MD05G1135400_1	Chr05:26353597|26353853	0	370.495	0	0	0	256	MD05G1135400
MD05G1142600_1	Chr05:27359497|27360412	0	84.3968	0	0	0	916	MD05G1142600
MD05G1151200_1	Chr05:28204100|28204296	0	290.656	0	0	0	196	MD05G1151200
n/a_589	Chr05:28548294|28607076	0	7.89093	0	0	0	58782	n/a
n/a_598	Chr05:30785308|30825342	0	14.2301	0	0	0	40034	n/a
MD05G1208300_1	Chr05:33967612|33967824	0	447.39	0	0	0	212	MD05G1208300
MD05G1209200_1	Chr05:34089649|34090108	0	390.851	0	0	0	364	MD05G1209200
MD05G1213700_1	Chr05:34510626|34511888	0	146.368	0	0	0	648	MD05G1213700
MD05G1214800_1	Chr05:34582185|34582356	0	333.15	0	0	0	171	MD05G1214800
MD05G1221000_1	Chr05:35355656|35355953	0	319.349	0	0	0	297	MD05G1221000
MD05G1230300_1	Chr05:36369893|36370532	0	163.703	0	0	0	348	MD05G1230300
MD05G1240000_2	Chr05:37090800|37090988	0	303.025	0	0	0	188	MD05G1240000
MD05G1240000_5	Chr05:37090800|37090997	0	877.816	0	0	0	197	MD05G1240000
MD05G1241100_1	Chr05:37168625|37170802	0	74.3716	0	0	0	766	MD05G1241100
MD05G1249500_1	Chr05:38115033|38115735	0	177.718	0	0	0	435	MD05G1249500
MD05G1249700_1	Chr05:38123292|38123561	0	211.779	0	0	0	269	MD05G1249700
MD05G1250500_1	Chr05:38271417|38274567	0	105.785	0	0	0	1827	MD05G1250500
n/a_556	Chr05:3903075|3906447	0	22.9263	0	0	0	3372	n/a
MD05G1268400_1	Chr05:40391014|40391165	0	377.276	0	0	0	151	MD05G1268400
MD05G1025100_3	Chr05:4103761|4104141	0	373.412	0	0	0	381	MD05G1025100
MD05G1025100_6	Chr05:4105081|4105455	0	1240.23	0	0	0	374	MD05G1025100
MD05G1281400_1	Chr05:41551260|41551431	0	1109.32	0	0	0	171	MD05G1281400
MD05G1290900_1	Chr05:42247550|42248081	0	390.196	0	0	0	219	MD05G1290900
n/a_639	Chr05:43378067|43447108	0	3.3592	0	0	0	69041	n/a
MD05G1309900_1	Chr05:44050412|44050756	0	579.623	0	0	0	344	MD05G1309900
MD05G1310400_2	Chr05:44109157|44109337	0	1580.78	0	0	0	90	MD05G1310400
MD05G1314300_1	Chr05:44448901|44449068	0	1987.8	0	0	0	167	MD05G1314300
n/a_651	Chr05:44523903|44543219	0	15.8239	0	0	0	19316	n/a
MD05G1316200_1	Chr05:44535957|44536599	0	342.407	0	0	0	554	MD05G1316200
n/a_659	Chr05:44773908|44824297	0	8.47932	0	0	0	50389	n/a
MD05G1028000_1	Chr05:4539913|4540214	0	189.265	0	0	0	301	MD05G1028000
MD05G1028100_1	Chr05:4575445|4575610	0	517.897	0	0	0	165	MD05G1028100
MD05G1334500_1	Chr05:45767674|45767819	0	654.114	0	0	0	145	MD05G1334500
MD05G1338300_1	Chr05:45976377|45977629	0	61.7472	0	0	0	1252	MD05G1338300
n/a_670	Chr05:46025074|46035709	0	7.26915	0	0	0	10635	n/a
n/a_672	Chr05:46081864|46100074	0	6.25685	0	0	0	18210	n/a
MD05G1341400_12	Chr05:46186903|46187167	0	292.831	0	0	0	264	MD05G1341400
MD05G1353500_1	Chr05:46979726|46980122	0	515.383	0	0	0	300	MD05G1353500
n/a_686	Chr05:47176005|47197643	0	30.6974	0	0	0	21638	n/a
MD05G1358300_1	Chr05:47364640|47364802	0	477.206	0	0	0	162	MD05G1358300
MD05G1358300_2	Chr05:47364766|47364958	0	445.067	0	0	0	192	MD05G1358300
MD05G1358300_3	Chr05:47364959|47365133	0	444.296	0	0	0	174	MD05G1358300
MD05G1359100_1	Chr05:47408066|47410600	0	200.734	0	0	0	945	MD05G1359100
MD05G1360300_1	Chr05:47490334|47490532	0	287.72	0	0	0	198	MD05G1360300
MD05G1361500_1	Chr05:47694935|47695254	0	594.65	0	0	0	319	MD05G1361500
MD05G1362700_1	Chr05:47769567|47771352	0	140.444	0	0	0	1013	MD05G1362700
MD05G1363200_1	Chr05:47798174|47799912	0	613.232	0	0	0	232	MD05G1363200
MD05G1364200_1	Chr05:47912970|47914772	0	114.699	0	0	0	674	MD05G1364200
MD05G1029400_1	Chr05:4815543|4816540	0	79.2331	0	0	0	719	MD05G1029400
MD05G1029500_1	Chr05:4823990|4824518	0	499.725	0	0	0	228	MD05G1029500
MD05G1038100_1	Chr05:6054773|6056801	0	205.663	0	0	0	831	MD05G1038100
n/a_559	Chr05:7388516|7484072	0	7.44432	0	0	0	95556	n/a
MD05G1044600_1	Chr05:7636753|7638012	0	213.632	0	0	0	800	MD05G1044600
MD05G1045000_1	Chr05:7735784|7736112	0	298.265	0	0	0	191	MD05G1045000
MD05G1045400_2	Chr05:7765554|7766683	0	127.447	0	0	0	447	MD05G1045400
MD05G1048200_1	Chr05:8198978|8199185	0	458.196	0	0	0	207	MD05G1048200
MD05G1049700_1	Chr05:8625957|8626116	0	596.52	0	0	0	159	MD05G1049700
MD06G1062000_1	Chr06:10095619|10095885	0	214.168	0	0	0	266	MD06G1062000
MD06G1012200_1	Chr06:1534126|1534291	0	468.53	0	0	0	165	MD06G1012200
MD06G1012200_2	Chr06:1534309|1534520	0	366.386	0	0	0	211	MD06G1012200
MD06G1073700_1	Chr06:18315597|18316121	0	278.961	0	0	0	340	MD06G1073700
MD06G1014800_1	Chr06:1885870|1886052	0	781.703	0	0	0	182	MD06G1014800
MD06G1078600_1	Chr06:19408200|19408363	0	524.251	0	0	0	163	MD06G1078600
MD06G1079300_1	Chr06:19520905|19521155	0	379.386	0	0	0	250	MD06G1079300
MD06G1081400_1	Chr06:19939201|19939559	0	264.935	0	0	0	358	MD06G1081400
MD06G1086400_1	Chr06:21324378|21325213	0	381.765	0	0	0	405	MD06G1086400
MD06G1105900_1	Chr06:24474065|24474220	0	498.758	0	0	0	155	MD06G1105900
n/a_712	Chr06:24689498|24734731	0	1.88917	0	0	0	45233	n/a
MD06G1111100_2	Chr06:24998412|24999026	0	185.566	0	0	0	614	MD06G1111100
n/a_718	Chr06:25459412|25535842	0	12.6713	0	0	0	76430	n/a
MD06G1134600_1	Chr06:27898905|27899122	0	393.792	0	0	0	217	MD06G1134600
MD06G1135200_1	Chr06:28018406|28018635	0	248.771	0	0	0	229	MD06G1135200
MD06G1138200_1	Chr06:28321921|28322093	0	331.213	0	0	0	172	MD06G1138200
MD06G1138200_2	Chr06:28321921|28322120	0	429.412	0	0	0	199	MD06G1138200
MD06G1138200_3	Chr06:28321968|28322132	0	521.054	0	0	0	164	MD06G1138200
MD06G1140600_1	Chr06:28451725|28451889	0	578.333	0	0	0	164	MD06G1140600
MD06G1147900_1	Chr06:29015026|29015353	0	236.414	0	0	0	327	MD06G1147900
MD06G1161800_1	Chr06:30268586|30268761	0	662.635	0	0	0	175	MD06G1161800
MD06G1167500_1	Chr06:30766336|30767063	0	255.651	0	0	0	371	MD06G1167500
MD06G1169900_1	Chr06:31046747|31047970	0	166.575	0	0	0	342	MD06G1169900
MD06G1002900_1	Chr06:311382|311558	0	439.247	0	0	0	176	MD06G1002900
MD06G1173400_2	Chr06:31331459|31331620	0	883.664	0	0	0	161	MD06G1173400
MD06G1173700_1	Chr06:31377883|31379314	0	510.843	0	0	0	557	MD06G1173700
n/a_738	Chr06:31528205|31617589	0	3.18334	0	0	0	89384	n/a
n/a_698	Chr06:3341405|3342056	0	178.128	0	0	0	651	n/a
MD06G1201900_1	Chr06:33516925|33517078	0	505.277	0	0	0	153	MD06G1201900
MD06G1216400_1	Chr06:34854352|34855572	0	202.232	0	0	0	938	MD06G1216400
MD06G1232100_1	Chr06:36306630|36306787	0	489.288	0	0	0	158	MD06G1232100
MD06G1237000_1	Chr06:36823093|36823276	0	422.445	0	0	0	183	MD06G1237000
MD06G1239200_1	Chr06:36969616|36969781	0	345.264	0	0	0	165	MD06G1239200
n/a_700	Chr06:3961004|3966256	0	1221.73	0	0	0	5252	n/a
MD06G1034700_1	Chr06:4316432|4316601	0	561.222	0	0	0	169	MD06G1034700
MD06G1037500_1	Chr06:4790321|4790496	0	541.981	0	0	0	175	MD06G1037500
Apple_newGene_38122_1	Chr06:5601526|5602038	0	301.982	0	0	0	512	Apple_newGene_38122
MD06G1043200_1	Chr06:5660877|5665440	0	55.5959	0	0	0	1706	MD06G1043200
MD06G1043400_1	Chr06:5698672|5700173	0	61.8552	0	0	0	921	MD06G1043400
MD06G1043800_4	Chr06:5882316|5883258	0	135.157	0	0	0	843	MD06G1043800
MD06G1045800_1	Chr06:6212873|6213023	0	515.383	0	0	0	150	MD06G1045800
MD06G1046600_1	Chr06:6322718|6323114	0	180.28	0	0	0	316	MD06G1046600
MD06G1046900_1	Chr06:6331645|6331843	0	390.442	0	0	0	198	MD06G1046900
n/a_706	Chr06:6537545|6537785	0	483.172	0	0	0	240	n/a
MD06G1050700_1	Chr06:6948043|6955445	0	42.4505	0	0	0	1342	MD06G1050700
MD06G1006900_1	Chr06:715490|715700	0	552.196	0	0	0	210	MD06G1006900
MD06G1056700_1	Chr06:8537114|8537371	0	300.807	0	0	0	257	MD06G1056700
MD06G1058200_1	Chr06:9026997|9027435	0	244.151	0	0	0	350	MD06G1058200
MD06G1058300_1	Chr06:9028820|9029004	0	630.224	0	0	0	184	MD06G1058300
n/a_795	Chr07:10097239|10131180	0	2.2777	0	0	0	33941	n/a
MD07G1096000_1	Chr07:10469763|10470497	0	242.724	0	0	0	637	MD07G1096000
n/a_796	Chr07:11303519|11380551	0	1.00358	0	0	0	77032	n/a
n/a_802	Chr07:12121993|12212301	0	0.630826	0	0	0	90308	n/a
n/a_803	Chr07:12123734|12149615	0	3.66472	0	0	0	25881	n/a
n/a_804	Chr07:12468050|12470864	0	54.9449	0	0	0	2814	n/a
MD07G1112500_2	Chr07:13149843|13151106	0	92.4815	0	0	0	616	MD07G1112500
MD07G1119600_1	Chr07:14951382|14952489	0	203.825	0	0	0	698	MD07G1119600
MD07G1123200_1	Chr07:15884080|15886305	0	60.2843	0	0	0	1890	MD07G1123200
MD07G1020000_3	Chr07:1705415|1707343	0	168.049	0	0	0	339	MD07G1020000
n/a_760	Chr07:1752265|1819061	0	0.852875	0	0	0	66796	n/a
MD07G1130400_1	Chr07:18640638|18640813	0	325.535	0	0	0	175	MD07G1130400
MD07G1132600_2	Chr07:19187879|19188052	0	329.298	0	0	0	173	MD07G1132600
n/a_764	Chr07:1954983|2042155	0	1.63206	0	0	0	87172	n/a
MD07G1143800_1	Chr07:20961289|20962261	0	107.691	0	0	0	529	MD07G1143800
MD07G1027700_2	Chr07:2314299|2318003	0	33.2935	0	0	0	3483	MD07G1027700
MD07G1160600_1	Chr07:23478805|23480502	0	343.589	0	0	0	225	MD07G1160600
MD07G1162700_1	Chr07:23760370|23760543	0	446.864	0	0	0	173	MD07G1162700
MD07G1165300_1	Chr07:24021572|24022547	0	110.404	0	0	0	516	MD07G1165300
MD07G1171400_1	Chr07:24771215|24772306	0	123.042	0	0	0	463	MD07G1171400
MD07G1174700_3	Chr07:25313843|25313993	0	379.791	0	0	0	150	MD07G1174700
n/a_817	Chr07:27689475|27699160	0	122.414	0	0	0	9685	n/a
MD07G1200200_1	Chr07:27823517|27823688	0	452.09	0	0	0	171	MD07G1200200
MD07G1203700_1	Chr07:28137288|28137461	0	670.296	0	0	0	173	MD07G1203700
MD07G1203800_1	Chr07:28148106|28148275	0	337.092	0	0	0	169	MD07G1203800
MD07G1212900_1	Chr07:29078648|29079447	0	161.384	0	0	0	353	MD07G1212900
MD07G1213500_1	Chr07:29107996|29108194	0	390.442	0	0	0	198	MD07G1213500
MD07G1213600_1	Chr07:29119466|29119660	0	293.653	0	0	0	194	MD07G1213600
n/a_775	Chr07:2976074|3000523	0	53.5923	0	0	0	24449	n/a
MD07G1222400_1	Chr07:29951776|29952135	0	238.03	0	0	0	359	MD07G1222400
MD07G1232200_1	Chr07:30628559|30628754	0	396.448	0	0	0	195	MD07G1232200
MD07G1238700_1	Chr07:31047469|31047656	0	826.818	0	0	0	187	MD07G1238700
MD07G1238700_2	Chr07:31047473|31047634	0	353.842	0	0	0	161	MD07G1238700
MD07G1244600_1	Chr07:31453578|31453788	0	271.279	0	0	0	210	MD07G1244600
MD07G1246100_1	Chr07:31583099|31583309	0	903.301	0	0	0	210	MD07G1246100
MD07G1251200_1	Chr07:31948625|31948861	0	241.392	0	0	0	236	MD07G1251200
MD07G1252500_2	Chr07:32032006|32032540	0	245.082	0	0	0	387	MD07G1252500
MD07G1257700_1	Chr07:32388744|32389203	0	168.426	0	0	0	459	MD07G1257700
n/a_835	Chr07:32614354|32651635	0	2.5441	0	0	0	37281	n/a
n/a_836	Chr07:32615615|32683767	0	1.39169	0	0	0	68152	n/a
n/a_837	Chr07:32617025|32685656	0	1.24511	0	0	0	68631	n/a
n/a_841	Chr07:33980625|34001286	0	5.61256	0	0	0	20661	n/a
n/a_752	Chr07:341444|381302	0	2.14393	0	0	0	39858	n/a
MD07G1286500_1	Chr07:34841726|34842208	0	290.94	0	0	0	326	MD07G1286500
MD07G1287000_1	Chr07:34867959|34868156	0	289.181	0	0	0	197	MD07G1287000
MD07G1289500_2	Chr07:35020191|35021030	0	394.426	0	0	0	294	MD07G1289500
MD07G1042400_1	Chr07:3556780|3558348	0	289.541	0	0	0	267	MD07G1042400
MD07G1042400_2	Chr07:3558228|3559016	0	616.815	0	0	0	188	MD07G1042400
n/a_845	Chr07:35649545|35650052	0	187.074	0	0	0	507	n/a
n/a_778	Chr07:3586061|3586268	0	550.421	0	0	0	207	n/a
n/a_846	Chr07:35941855|35963627	0	2.6166	0	0	0	21772	n/a
n/a_847	Chr07:36344928|36388751	0	4.11427	0	0	0	43823	n/a
n/a_780	Chr07:3877476|3887009	0	5.97594	0	0	0	9533	n/a
MD07G1048200_1	Chr07:4125028|4125206	0	320.048	0	0	0	178	MD07G1048200
MD07G1048200_2	Chr07:4128121|4128505	0	292.647	0	0	0	292	MD07G1048200
MD07G1060900_1	Chr07:5692437|5692990	0	103.017	0	0	0	553	MD07G1060900
MD07G1005600_1	Chr07:576389|576545	0	1215.98	0	0	0	156	MD07G1005600
MD07G1068100_1	Chr07:6450467|6452370	0	967.822	0	0	0	147	MD07G1068100
MD07G1074000_1	Chr07:7024750|7026251	0	181.429	0	0	0	471	MD07G1074000
n/a_754	Chr07:827205|857909	0	6.17813	0	0	0	30704	n/a
MD07G1084200_1	Chr07:8678952|8679130	0	434.311	0	0	0	178	MD07G1084200
MD08G1015800_2	Chr08:1238815|1239004	0	409.034	0	0	0	189	MD08G1015800
MD08G1140900_1	Chr08:13897895|13898666	0	157.449	0	0	0	491	MD08G1140900
MD08G1145500_1	Chr08:14471178|14474650	0	203.752	0	0	0	931	MD08G1145500
MD08G1147000_1	Chr08:14812300|14812489	0	409.034	0	0	0	189	MD08G1147000
MD08G1025800_1	Chr08:1861814|1861994	0	316.492	0	0	0	180	MD08G1025800
MD08G1165500_1	Chr08:19487789|19488000	0	449.51	0	0	0	211	MD08G1165500
n/a_856	Chr08:2063999|2089500	0	25.6907	0	0	0	25501	n/a
MD08G1002300_1	Chr08:221812|222144	0	661.834	0	0	0	332	MD08G1002300
MD08G1032500_1	Chr08:2317843|2318259	0	227.997	0	0	0	416	MD08G1032500
n/a_859	Chr08:2338071|2342343	0	18.0963	0	0	0	4272	n/a
MD08G1197400_1	Chr08:25591771|25591987	0	791.231	0	0	0	216	MD08G1197400
n/a_905	Chr08:26167439|26198125	0	3.77896	0	0	0	30686	n/a
n/a_908	Chr08:26170040|26209930	0	2.85629	0	0	0	39890	n/a
MD08G1203800_4	Chr08:26359956|26363729	0	130.462	0	0	0	1310	MD08G1203800
n/a_913	Chr08:26468048|26542478	0	6.23196	0	0	0	74430	n/a
n/a_914	Chr08:26468048|26543467	0	1.13304	0	0	0	75419	n/a
n/a_918	Chr08:26470957|26545934	0	4.93879	0	0	0	74977	n/a
MD08G1206900_1	Chr08:26870880|26871030	0	632.311	0	0	0	150	MD08G1206900
MD08G1211000_1	Chr08:27436179|27440164	0	55.7774	0	0	0	1386	MD08G1211000
MD08G1211000_2	Chr08:27436254|27436476	0	348.232	0	0	0	222	MD08G1211000
MD08G1211200_2	Chr08:27487567|27487726	0	596.52	0	0	0	159	MD08G1211200
n/a_924	Chr08:27644779|27646119	0	57.6921	0	0	0	1340	n/a
MD08G1213200_1	Chr08:27652270|27652466	0	290.656	0	0	0	196	MD08G1213200
MD08G1037800_2	Chr08:2780368|2780568	0	1275.42	0	0	0	67	MD08G1037800
MD08G1217300_1	Chr08:27999868|28001043	0	303.166	0	0	0	255	MD08G1217300
MD08G1218200_2	Chr08:28071400|28071574	0	444.296	0	0	0	174	MD08G1218200
MD08G1218200_3	Chr08:28071533|28071731	0	390.442	0	0	0	198	MD08G1218200
MD08G1230000_1	Chr08:29567155|29568590	0	214.168	0	0	0	532	MD08G1230000
MD08G1230300_1	Chr08:29583746|29585477	0	62.0123	0	0	0	1378	MD08G1230300
n/a_944	Chr08:30244855|30270202	0	4.57495	0	0	0	25347	n/a
MD08G1235100_1	Chr08:30270292|30270554	0	362.01	0	0	0	262	MD08G1235100
MD08G1235900_1	Chr08:30357324|30359653	0	225.386	0	0	0	343	MD08G1235900
MD08G1236100_1	Chr08:30405823|30406009	0	306.283	0	0	0	186	MD08G1236100
MD08G1243300_1	Chr08:30869987|30871036	0	202.232	0	0	0	469	MD08G1243300
MD08G1243300_2	Chr08:30870926|30871528	0	335.11	0	0	0	170	MD08G1243300
MD08G1247700_2	Chr08:31134054|31134808	0	170.31	0	0	0	669	MD08G1247700
MD08G1248600_1	Chr08:31314127|31314286	0	537.44	0	0	0	159	MD08G1248600
MD08G1249500_1	Chr08:31369375|31369619	0	232.525	0	0	0	245	MD08G1249500
MD08G1047300_1	Chr08:3569222|3570332	0	98.2218	0	0	0	580	MD08G1047300
MD08G1003700_2	Chr08:373597|374139	0	179.368	0	0	0	431	MD08G1003700
MD08G1051400_1	Chr08:4073959|4074151	0	805.286	0	0	0	192	MD08G1051400
MD08G1004500_4	Chr08:418148|418698	0	441.147	0	0	0	215	MD08G1004500
MD08G1004500_6	Chr08:418171|418707	0	283.426	0	0	0	201	MD08G1004500
MD08G1004500_9	Chr08:418857|419255	0	194.24	0	0	0	398	MD08G1004500
MD08G1004700_1	Chr08:434700|435250	0	190.883	0	0	0	405	MD08G1004700
MD08G1064700_1	Chr08:5143569|5143755	0	623.447	0	0	0	186	MD08G1064700
MD08G1066700_2	Chr08:5339944|5340096	0	374.794	0	0	0	152	MD08G1066700
n/a_886	Chr08:5682705|5683195	0	315.541	0	0	0	490	n/a
MD08G1072100_1	Chr08:5751823|5754273	0	122.433	0	0	0	2210	MD08G1072100
MD08G1075300_1	Chr08:6115862|6116023	0	353.842	0	0	0	161	MD08G1075300
MD08G1080200_1	Chr08:6680527|6683339	0	84.5815	0	0	0	914	MD08G1080200
MD08G1089900_1	Chr08:7434626|7435974	0	126.785	0	0	0	1348	MD08G1089900
MD08G1093300_1	Chr08:7763554|7763757	0	380.825	0	0	0	203	MD08G1093300
MD08G1095100_1	Chr08:7983404|7983578	0	327.406	0	0	0	174	MD08G1095100
MD08G1095500_1	Chr08:7990600|7991081	0	200.799	0	0	0	385	MD08G1095500
MD08G1097400_1	Chr08:8202752|8202907	0	735.079	0	0	0	155	MD08G1097400
MD08G1010800_3	Chr08:828315|828513	0	287.72	0	0	0	198	MD08G1010800
n/a_890	Chr08:8365362|8366592	0	46.316	0	0	0	1230	n/a
MD08G1011200_1	Chr08:864812|866021	0	155.228	0	0	0	734	MD08G1011200
n/a_1022	Chr09:10046332|10111386	0	1.31357	0	0	0	65054	n/a
MD09G1133800_1	Chr09:10287774|10288536	0	121.553	0	0	0	636	MD09G1133800
n/a_1028	Chr09:10718586|10742875	0	3.18282	0	0	0	24289	n/a
MD09G1017400_1	Chr09:1086171|1086340	0	337.092	0	0	0	169	MD09G1017400
n/a_1035	Chr09:11055811|11075290	0	2.92462	0	0	0	19479	n/a
MD09G1151800_1	Chr09:12017510|12017759	0	341.812	0	0	0	250	MD09G1151800
n/a_1037	Chr09:12523006|12553811	0	1.84933	0	0	0	30805	n/a
n/a_953	Chr09:1276080|1283499	0	15.3575	0	0	0	7419	n/a
n/a_954	Chr09:1460652|1499991	0	2.41101	0	0	0	39339	n/a
n/a_957	Chr09:1499215|1547968	0	9.59512	0	0	0	48753	n/a
MD09G1176600_1	Chr09:15109573|15109767	0	293.653	0	0	0	194	MD09G1176600
MD09G1178100_2	Chr09:15242798|15243445	0	263.463	0	0	0	360	MD09G1178100
MD09G1188600_1	Chr09:16492968|16493525	0	138.793	0	0	0	557	MD09G1188600
MD09G1192000_1	Chr09:17038632|17038929	0	390.442	0	0	0	297	MD09G1192000
MD09G1193600_1	Chr09:17361741|17361902	0	530.764	0	0	0	161	MD09G1193600
n/a_1045	Chr09:17725964|17729512	0	40.1414	0	0	0	3548	n/a
MD09G1030400_1	Chr09:1860777|1860927	0	379.791	0	0	0	150	MD09G1030400
MD09G1206000_1	Chr09:19669407|19669560	0	505.277	0	0	0	153	MD09G1206000
MD09G1225000_2	Chr09:27700126|27700486	0	328.968	0	0	0	235	MD09G1225000
n/a_1059	Chr09:28594910|28644519	0	45.9341	0	0	0	49609	n/a
MD09G1233800_1	Chr09:29382395|29385282	0	145.042	0	0	0	533	MD09G1233800
MD09G1243400_1	Chr09:31104224|31105673	0	166.611	0	0	0	464	MD09G1243400
MD09G1047500_1	Chr09:3111398|3112198	0	230.998	0	0	0	502	MD09G1047500
MD09G1243600_1	Chr09:31121837|31122933	0	132.485	0	0	0	645	MD09G1243600
MD09G1247300_1	Chr09:31703269|31705938	0	107.691	0	0	0	529	MD09G1247300
Apple_newGene_52231_2	Chr09:33008088|33008259	0	452.09	0	0	0	171	Apple_newGene_52231
MD09G1258800_1	Chr09:33085803|33087018	0	63.7233	0	0	0	894	MD09G1258800
MD09G1260000_1	Chr09:33277181|33277403	0	348.232	0	0	0	222	MD09G1260000
n/a_1068	Chr09:34347433|34412591	0	3.0601	0	0	0	65158	n/a
MD09G1281500_1	Chr09:35863768|35864131	0	522.571	0	0	0	363	MD09G1281500
MD09G1282000_1	Chr09:35886696|35887519	0	133.75	0	0	0	578	MD09G1282000
n/a_1082	Chr09:35989095|36005591	0	5.18022	0	0	0	16496	n/a
MD09G1287600_1	Chr09:36756065|36757144	0	164.175	0	0	0	347	MD09G1287600
n/a_980	Chr09:3681798|3688951	0	10.8077	0	0	0	7153	n/a
MD09G1064200_1	Chr09:4400283|4400487	0	378.958	0	0	0	204	MD09G1064200
MD09G1067100_1	Chr09:4558749|4558901	0	374.794	0	0	0	152	MD09G1067100
MD09G1075600_1	Chr09:5336951|5337287	0	339.099	0	0	0	336	MD09G1075600
MD09G1079400_2	Chr09:5570407|5571456	0	109.145	0	0	0	869	MD09G1079400
MD09G1008400_1	Chr09:593388|593972	0	162.409	0	0	0	584	MD09G1008400
n/a_1008	Chr09:6895714|6921077	0	5.60935	0	0	0	25363	n/a
MD09G1103400_1	Chr09:7574530|7574904	0	253.601	0	0	0	374	MD09G1103400
MD09G1104500_1	Chr09:7626296|7627328	0	101.116	0	0	0	938	MD09G1104500
n/a_1012	Chr09:8127319|8141224	0	6.82104	0	0	0	13905	n/a
MD09G1014400_1	Chr09:917896|918118	0	255.465	0	0	0	223	MD09G1014400
MD09G1119300_2	Chr09:9214735|9214938	0	380.825	0	0	0	203	MD09G1119300
MD09G1119300_4	Chr09:9214754|9214938	0	1823.58	0	0	0	184	MD09G1119300
MD09G1015500_1	Chr09:955962|956161	0	582.719	0	0	0	199	MD09G1015500
MD10G1072800_1	Chr10:10129676|10129995	0	362.379	0	0	0	320	MD10G1072800
n/a_1114	Chr10:10222475|10269248	0	11.6574	0	0	0	46773	n/a
MD10G1080700_1	Chr10:11915142|11915309	0	682.259	0	0	0	167	MD10G1080700
MD10G1081300_1	Chr10:11962237|11962835	0	95.2653	0	0	0	598	MD10G1081300
n/a_1119	Chr10:13057714|13057874	0	889.187	0	0	0	160	n/a
MD10G1088400_1	Chr10:13109474|13110063	0	161.03	0	0	0	589	MD10G1088400
n/a_1121	Chr10:13145160|13178530	0	2.84227	0	0	0	33370	n/a
n/a_1124	Chr10:16043048|16100096	0	6.09808	0	0	0	57048	n/a
MD10G1100100_1	Chr10:16152479|16153679	0	261.324	0	0	0	436	MD10G1100100
MD10G1100500_1	Chr10:16276786|16277143	0	216.547	0	0	0	357	MD10G1100500
MD10G1110200_1	Chr10:18131369|18131534	0	345.264	0	0	0	165	MD10G1110200
n/a_1090	Chr10:1903726|1920249	0	5.17176	0	0	0	16523	n/a
MD10G1121500_1	Chr10:19861491|19861728	0	360.561	0	0	0	237	MD10G1121500
MD10G1133000_1	Chr10:21457356|21457524	0	460.163	0	0	0	168	MD10G1133000
n/a_1133	Chr10:21817381|21857062	0	14.1085	0	0	0	39681	n/a
Apple_newGene_55239_2	Chr10:22122459|22122696	0	400.197	0	0	0	237	Apple_newGene_55239
Apple_newGene_55239_3	Chr10:22124466|22128662	0	33.9422	0	0	0	4196	Apple_newGene_55239
MD10G1139800_2	Chr10:22453023|22455955	0	108.894	0	0	0	871	MD10G1139800
MD10G1147000_1	Chr10:23392073|23392268	0	438.22	0	0	0	195	MD10G1147000
n/a_1136	Chr10:23674026|23681215	0	10.7536	0	0	0	7189	n/a
MD10G1156300_1	Chr10:24480508|24480673	0	345.264	0	0	0	165	MD10G1156300
MD10G1172900_1	Chr10:26550548|26551869	0	81.6169	0	0	0	698	MD10G1172900
MD10G1189500_1	Chr10:28609375|28611732	0	130.662	0	0	0	436	MD10G1189500
MD10G1193300_1	Chr10:28948501|28949754	0	162.07	0	0	0	477	MD10G1193300
MD10G1197700_2	Chr10:29595287|29595440	0	505.277	0	0	0	153	MD10G1197700
MD10G1213800_1	Chr10:31233587|31233835	0	1246.89	0	0	0	248	MD10G1213800
n/a_1147	Chr10:31783378|31819721	0	41.4741	0	0	0	36343	n/a
MD10G1231300_1	Chr10:32802836|32803102	0	537.44	0	0	0	159	MD10G1231300
MD10G1232800_1	Chr10:32921103|32921304	0	283.426	0	0	0	201	MD10G1232800
n/a_1154	Chr10:33586653|33685151	0	0.578373	0	0	0	98498	n/a
MD10G1241500_1	Chr10:33685364|33685593	0	373.157	0	0	0	229	MD10G1241500
MD10G1259000_1	Chr10:35322652|35322835	0	311.304	0	0	0	183	MD10G1259000
MD10G1261500_1	Chr10:35569567|35570732	0	135.627	0	0	0	570	MD10G1261500
MD10G1264300_2	Chr10:35794513|35794673	0	592.791	0	0	0	160	MD10G1264300
n/a_1166	Chr10:36342287|36346198	0	14.5663	0	0	0	3911	n/a
n/a_1168	Chr10:36842006|36845069	0	37.8587	0	0	0	3063	n/a
MD10G1277900_1	Chr10:36868040|36868256	0	536.857	0	0	0	216	MD10G1277900
n/a_1169	Chr10:37435003|37438492	0	67.9612	0	0	0	3489	n/a
MD10G1289700_1	Chr10:37854710|37854872	0	1431.62	0	0	0	162	MD10G1289700
MD10G1293200_1	Chr10:38152572|38152753	0	640.669	0	0	0	181	MD10G1293200
MD10G1295300_4	Chr10:38288938|38290504	0	170.31	0	0	0	669	MD10G1295300
MD10G1029200_1	Chr10:3839513|3839735	0	522.348	0	0	0	222	MD10G1029200
n/a_1171	Chr10:38746552|38746704	0	374.794	0	0	0	152	n/a
MD10G1300600_1	Chr10:38780918|38785982	0	24.4291	0	0	0	2332	MD10G1300600
MD10G1314900_2	Chr10:39894816|39895272	0	339.068	0	0	0	456	MD10G1314900
MD10G1321200_1	Chr10:40317795|40317986	0	404.751	0	0	0	191	MD10G1321200
MD10G1327600_1	Chr10:40719923|40720112	0	301.421	0	0	0	189	MD10G1327600
MD10G1331100_1	Chr10:40919093|40920723	0	86.5784	0	0	0	658	MD10G1331100
MD10G1332400_3	Chr10:40983231|40983416	0	835.756	0	0	0	185	MD10G1332400
MD10G1335100_1	Chr10:41240158|41240937	0	198.224	0	0	0	390	MD10G1335100
MD10G1339200_1	Chr10:41498897|41499116	0	649.634	0	0	0	219	MD10G1339200
n/a_1105	Chr10:4765989|4766147	0	540.841	0	0	0	158	n/a
n/a_1106	Chr10:5238677|5299127	0	1.27887	0	0	0	60450	n/a
MD10G1041500_1	Chr10:5395864|5396504	0	192.307	0	0	0	402	MD10G1041500
MD10G1046600_1	Chr10:6259677|6260311	0	157.129	0	0	0	492	MD10G1046600
MD10G1056800_2	Chr10:7747658|7747853	0	292.147	0	0	0	195	MD10G1056800
MD10G1057600_2	Chr10:7819504|7821772	0	135.963	0	0	0	419	MD10G1057600
MD10G1061800_1	Chr10:8331926|8332093	0	511.694	0	0	0	167	MD10G1061800
MD10G1064000_1	Chr10:8694668|8694995	0	472.828	0	0	0	327	MD10G1064000
MD11G1115100_1	Chr11:10384141|10384326	0	512.684	0	0	0	185	MD11G1115100
n/a_1266	Chr11:10540167|10544595	0	12.8655	0	0	0	4428	n/a
MD11G1117100_1	Chr11:10602408|10602834	0	181.473	0	0	0	426	MD11G1117100
MD11G1120700_1	Chr11:11031389|11031539	0	379.791	0	0	0	150	MD11G1120700
MD11G1131700_1	Chr11:11921373|11922045	0	84.7747	0	0	0	672	MD11G1131700
MD11G1133400_1	Chr11:12236906|12241479	0	35.1008	0	0	0	1623	MD11G1133400
MD11G1144200_1	Chr11:13390909|13391122	0	362.946	0	0	0	213	MD11G1144200
n/a_1198	Chr11:1422288|1443134	0	11.3747	0	0	0	20846	n/a
MD11G1151700_2	Chr11:14452847|14453016	0	502.664	0	0	0	170	MD11G1151700
MD11G1001000_1	Chr11:144712|145780	0	125.759	0	0	0	453	MD11G1001000
MD11G1155000_1	Chr11:14868589|14868782	0	495.379	0	0	0	115	MD11G1155000
MD11G1156300_2	Chr11:15034841|15034994	0	372.344	0	0	0	153	MD11G1156300
MD11G1174100_1	Chr11:20346336|20346508	0	1102.87	0	0	0	172	MD11G1174100
MD11G1178700_1	Chr11:21482370|21482520	0	948.466	0	0	0	150	MD11G1178700
MD11G1182100_1	Chr11:22424441|22424702	0	411.21	0	0	0	188	MD11G1182100
MD11G1182700_5	Chr11:22539952|22540103	0	377.276	0	0	0	151	MD11G1182700
n/a_1209	Chr11:2396885|2418141	0	10.7205	0	0	0	21256	n/a
MD11G1183900_1	Chr11:24109574|24109772	0	431.58	0	0	0	198	MD11G1183900
MD11G1027900_1	Chr11:2436309|2436608	0	1053.85	0	0	0	90	MD11G1027900
MD11G1184600_1	Chr11:24701868|24702330	0	205.296	0	0	0	462	MD11G1184600
Apple_newGene_59837_1	Chr11:24702572|24703016	0	174.116	0	0	0	444	Apple_newGene_59837
MD11G1184900_1	Chr11:24752931|24753192	0	296.197	0	0	0	261	MD11G1184900
n/a_1212	Chr11:2743403|2760773	0	10.9207	0	0	0	17370	n/a
n/a_1213	Chr11:2763807|2816700	0	5.9238	0	0	0	52893	n/a
n/a_1278	Chr11:28836055|28840523	0	25.9537	0	0	0	4468	n/a
MD11G1036500_1	Chr11:3156407|3156794	0	268.429	0	0	0	288	MD11G1036500
MD11G1217000_1	Chr11:31649294|31651224	0	142.412	0	0	0	666	MD11G1217000
MD11G1217300_1	Chr11:31707614|31707782	0	460.163	0	0	0	168	MD11G1217300
MD11G1037400_2	Chr11:3204965|3205227	0	362.01	0	0	0	262	MD11G1037400
MD11G1037400_3	Chr11:3205849|3205986	0	831.659	0	0	0	137	MD11G1037400
MD11G1222000_1	Chr11:32518438|32519642	0	143.162	0	0	0	540	MD11G1222000
n/a_1285	Chr11:34789337|34790752	0	167.574	0	0	0	1415	n/a
MD11G1247100_1	Chr11:35905803|35905967	0	694.739	0	0	0	164	MD11G1247100
MD11G1247800_2	Chr11:35980999|35981796	0	171.824	0	0	0	552	MD11G1247800
MD11G1042100_1	Chr11:3620429|3620941	0	298.26	0	0	0	318	MD11G1042100
MD11G1267200_1	Chr11:38217458|38218448	0	86.1844	0	0	0	897	MD11G1267200
MD11G1274100_1	Chr11:39077167|39077356	0	501.834	0	0	0	189	MD11G1274100
MD11G1277600_1	Chr11:39478168|39478528	0	478.206	0	0	0	360	MD11G1277600
MD11G1285000_1	Chr11:40341467|40341667	0	711.35	0	0	0	200	MD11G1285000
n/a_1301	Chr11:40419400|40445690	0	31.7284	0	0	0	26290	n/a
n/a_1302	Chr11:40419658|40445929	0	14.7135	0	0	0	26271	n/a
n/a_1303	Chr11:40419658|40462533	0	8.49387	0	0	0	42875	n/a
n/a_1218	Chr11:4069577|4070357	0	109.555	0	0	0	780	n/a
MD11G1298100_1	Chr11:41509969|41511734	0	348.232	0	0	0	333	MD11G1298100
MD11G1048100_1	Chr11:4185642|4185942	0	189.895	0	0	0	300	MD11G1048100
MD11G1307100_1	Chr11:42126173|42126337	0	867.499	0	0	0	164	MD11G1307100
n/a_1329	Chr11:42720397|42721377	0	58.1312	0	0	0	980	n/a
MD11G1005100_1	Chr11:466356|466633	0	278.084	0	0	0	278	MD11G1005100
n/a_1221	Chr11:4716125|4716297	0	449.462	0	0	0	172	n/a
MD11G1056000_1	Chr11:4753194|4753397	0	280.634	0	0	0	203	MD11G1056000
n/a_1226	Chr11:5523168|5572050	0	8.03279	0	0	0	48882	n/a
n/a_1230	Chr11:5533285|5572050	0	4.40877	0	0	0	38765	n/a
n/a_1232	Chr11:5660358|5660541	0	311.304	0	0	0	183	n/a
n/a_1234	Chr11:5739137|5740512	0	62.1476	0	0	0	1375	n/a
MD11G1071500_1	Chr11:6092071|6092281	0	451.65	0	0	0	210	MD11G1071500
MD11G1071900_1	Chr11:6116720|6116904	0	307.938	0	0	0	185	MD11G1071900
n/a_1195	Chr11:632765|686146	0	1.44822	0	0	0	53381	n/a
MD11G1080700_1	Chr11:6875710|6876551	0	126.597	0	0	0	450	MD11G1080700
MD11G1080800_1	Chr11:6883582|6883767	0	835.756	0	0	0	185	MD11G1080800
n/a_1242	Chr11:7058731|7067219	0	27.3236	0	0	0	8488	n/a
n/a_1244	Chr11:7060290|7068444	0	118.512	0	0	0	8154	n/a
n/a_1245	Chr11:7073712|7091073	0	4.92212	0	0	0	17361	n/a
n/a_1252	Chr11:7617371|7617544	0	329.298	0	0	0	173	n/a
n/a_1261	Chr11:9505702|9528255	0	3.42781	0	0	0	22553	n/a
MD11G1109200_2	Chr11:9653510|9653814	0	623.991	0	0	0	304	MD11G1109200
n/a_1264	Chr11:9654213|9671120	0	16.8476	0	0	0	16907	n/a
MD12G1083000_1	Chr12:10077780|10078809	0	207.816	0	0	0	372	MD12G1083000
MD12G1093800_1	Chr12:12381401|12388020	0	107.903	0	0	0	879	MD12G1093800
MD12G1095800_1	Chr12:13257344|13257505	0	960.341	0	0	0	161	MD12G1095800
MD12G1096900_1	Chr12:15262511|15262667	0	743.341	0	0	0	156	MD12G1096900
MD12G1107400_2	Chr12:16957032|16957201	0	686.161	0	0	0	169	MD12G1107400
MD12G1017600_2	Chr12:1702189|1702997	0	108.512	0	0	0	525	MD12G1017600
MD12G1018100_1	Chr12:1732348|1732513	0	862.242	0	0	0	165	MD12G1018100
MD12G1123100_1	Chr12:19747840|19748384	0	152.323	0	0	0	374	MD12G1123100
n/a_1359	Chr12:20001924|20010387	0	264.908	0	0	0	8463	n/a
n/a_1373	Chr12:20182055|20247188	0	18.3677	0	0	0	65133	n/a
MD12G1129500_1	Chr12:20470055|20470333	0	925.333	0	0	0	205	MD12G1129500
n/a_1374	Chr12:20576087|20592745	0	3.4199	0	0	0	16658	n/a
MD12G1141500_2	Chr12:22000031|22000195	0	471.387	0	0	0	164	MD12G1141500
MD12G1141500_9	Chr12:22000056|22000254	0	431.58	0	0	0	198	MD12G1141500
n/a_1376	Chr12:23040802|23050042	0	135.64	0	0	0	9240	n/a
n/a_1382	Chr12:24596596|24597138	0	157.662	0	0	0	542	n/a
MD12G1181800_1	Chr12:26147269|26147524	0	223.406	0	0	0	255	MD12G1181800
MD12G1186700_1	Chr12:26890779|26891239	0	817.643	0	0	0	348	MD12G1186700
n/a_1391	Chr12:27461571|27476305	0	13.1172	0	0	0	14734	n/a
MD12G1201100_1	Chr12:28171369|28171605	0	602.839	0	0	0	236	MD12G1201100
MD12G1204700_1	Chr12:28551639|28552096	0	517.897	0	0	0	165	MD12G1204700
MD12G1215400_1	Chr12:29379990|29380165	0	325.535	0	0	0	175	MD12G1215400
MD12G1216700_1	Chr12:29426438|29426716	0	594.673	0	0	0	195	MD12G1216700
n/a_1405	Chr12:29505585|29530653	0	4.54513	0	0	0	25068	n/a
n/a_1407	Chr12:29637364|29643225	0	37.49	0	0	0	5861	n/a
n/a_1408	Chr12:29756167|29769276	0	45.6305	0	0	0	13109	n/a
MD12G1224200_1	Chr12:30048081|30048729	0	205.663	0	0	0	277	MD12G1224200
MD12G1027100_1	Chr12:3063817|3063994	0	321.857	0	0	0	177	MD12G1027100
MD12G1238000_1	Chr12:31141626|31141778	0	623.991	0	0	0	152	MD12G1238000
MD12G1028200_1	Chr12:3152153|3152420	0	304.645	0	0	0	187	MD12G1028200
n/a_1438	Chr12:32232526|32321691	0	2.55565	0	0	0	89165	n/a
n/a_1439	Chr12:32254802|32272048	0	3.30329	0	0	0	17246	n/a
n/a_1440	Chr12:32255815|32292805	0	6.16043	0	0	0	36990	n/a
n/a_1441	Chr12:32257011|32274217	0	4.96646	0	0	0	17206	n/a
n/a_1445	Chr12:32410576|32414798	0	18.3106	0	0	0	4222	n/a
MD12G1256600_1	Chr12:32419973|32420153	0	790.388	0	0	0	180	MD12G1256600
MD12G1256600_2	Chr12:32420135|32420291	0	607.991	0	0	0	156	MD12G1256600
n/a_1448	Chr12:32627589|32627864	0	207.159	0	0	0	275	n/a
MD12G1033300_1	Chr12:3684778|3686135	0	403.317	0	0	0	494	MD12G1033300
MD12G1036400_1	Chr12:3914724|3915535	0	176.501	0	0	0	438	MD12G1036400
n/a_1331	Chr12:584451|592651	0	103.705	0	0	0	8200	n/a
MD12G1053000_1	Chr12:5934223|5935010	0	180.66	0	0	0	525	MD12G1053000
MD12G1056100_1	Chr12:6380007|6380168	0	878.209	0	0	0	162	MD12G1056100
n/a_1348	Chr12:7967139|7971952	0	111.594	0	0	0	4813	n/a
MD12G1007400_1	Chr12:820819|820985	0	465.708	0	0	0	166	MD12G1007400
MD12G1008100_1	Chr12:868472|868944	0	241.392	0	0	0	472	MD12G1008100
MD12G1078600_1	Chr12:9575379|9576742	0	155.548	0	0	0	497	MD12G1078600
MD13G1136900_3	Chr13:10529176|10529392	0	527.487	0	0	0	216	MD13G1136900
MD13G1141000_1	Chr13:10901359|10901914	0	395.435	0	0	0	391	MD13G1141000
n/a_1472	Chr13:11124017|11151106	0	2.10302	0	0	0	27089	n/a
n/a_1473	Chr13:11287043|11301538	0	58.6673	0	0	0	14495	n/a
n/a_1474	Chr13:12022335|12026261	0	36.2379	0	0	0	3926	n/a
MD13G1157200_1	Chr13:12275304|12275532	0	339.068	0	0	0	228	MD13G1157200
MD13G1020100_1	Chr13:1269966|1270122	0	607.991	0	0	0	156	MD13G1020100
MD13G1161400_2	Chr13:12714955|12715163	0	273.888	0	0	0	208	MD13G1161400
MD13G1020200_1	Chr13:1272689|1272865	0	323.685	0	0	0	176	MD13G1020200
MD13G1174700_3	Chr13:14428314|14428482	0	339.099	0	0	0	168	MD13G1174700
n/a_1478	Chr13:14879838|14880408	0	166.398	0	0	0	570	n/a
MD13G1193100_1	Chr13:16727107|16727380	0	313.014	0	0	0	273	MD13G1193100
n/a_1479	Chr13:16838834|16839181	0	222.788	0	0	0	347	n/a
n/a_1449	Chr13:178400|178579	0	318.26	0	0	0	179	n/a
MD13G1200600_1	Chr13:17842965|17843118	0	619.912	0	0	0	153	MD13G1200600
MD13G1200600_2	Chr13:17843116|17843605	0	147.97	0	0	0	385	MD13G1200600
MD13G1203600_1	Chr13:18329267|18329549	0	282.023	0	0	0	202	MD13G1203600
MD13G1204000_1	Chr13:18368773|18369397	0	421.54	0	0	0	225	MD13G1204000
MD13G1026500_1	Chr13:1922920|1923547	0	90.859	0	0	0	627	MD13G1026500
MD13G1235800_1	Chr13:23805923|23806123	0	284.843	0	0	0	200	MD13G1235800
MD13G1239500_1	Chr13:24501437|24501889	0	125.759	0	0	0	453	MD13G1239500
MD13G1035900_1	Chr13:2500697|2500855	0	978.575	0	0	0	158	MD13G1035900
n/a_1486	Chr13:25162830|25163079	0	380.91	0	0	0	249	n/a
MD13G1243400_1	Chr13:25395190|25396705	0	211.223	0	0	0	732	MD13G1243400
MD13G1252500_1	Chr13:26933649|26941369	0	57.0256	0	0	0	999	MD13G1252500
MD13G1261900_1	Chr13:33124813|33125111	0	318.277	0	0	0	298	MD13G1261900
MD13G1267100_1	Chr13:34818499|34820196	0	162.767	0	0	0	700	MD13G1267100
MD13G1049400_1	Chr13:3495896|3496354	0	453.331	0	0	0	377	MD13G1049400
n/a_1490	Chr13:36439519|36439934	0	372.566	0	0	0	415	n/a
MD13G1275700_1	Chr13:37998092|37999175	0	344.098	0	0	0	337	MD13G1275700
MD13G1279000_2	Chr13:39192688|39205170	0	65.2614	0	0	0	2180	MD13G1279000
MD13G1006400_2	Chr13:405735|406104	0	613.551	0	0	0	126	MD13G1006400
MD13G1283100_6	Chr13:41745916|41746101	0	307.938	0	0	0	185	MD13G1283100
MD13G1285500_1	Chr13:44048536|44048730	0	398.492	0	0	0	194	MD13G1285500
MD13G1007100_1	Chr13:461334|461676	0	166.575	0	0	0	342	MD13G1007100
MD13G1069400_1	Chr13:4876736|4876996	0	219.11	0	0	0	260	MD13G1069400
MD13G1073600_1	Chr13:5188004|5188527	0	411.21	0	0	0	376	MD13G1073600
MD13G1074500_1	Chr13:5264379|5264557	0	1302.93	0	0	0	178	MD13G1074500
MD13G1077200_1	Chr13:5452274|5452619	0	458.345	0	0	0	253	MD13G1077200
MD13G1079000_1	Chr13:5546812|5549406	0	148.668	0	0	0	1560	MD13G1079000
MD13G1082900_2	Chr13:5790980|5791507	0	216.2	0	0	0	527	MD13G1082900
MD13G1089500_2	Chr13:6275983|6276670	0	201.321	0	0	0	384	MD13G1089500
n/a_1460	Chr13:6420745|6439674	0	130.917	0	0	0	18929	n/a
MD13G1093500_1	Chr13:6585842|6587081	0	166.69	0	0	0	569	MD13G1093500
MD13G1095800_1	Chr13:6768770|6769105	0	170.056	0	0	0	335	MD13G1095800
MD13G1096800_1	Chr13:6859604|6860725	0	196.777	0	0	0	482	MD13G1096800
n/a_1462	Chr13:7369703|7409384	0	7.17068	0	0	0	39681	n/a
n/a_1466	Chr13:7519879|7537276	0	179.971	0	0	0	17397	n/a
n/a_1468	Chr13:8576680|8576863	0	1295.72	0	0	0	183	n/a
MD13G1118100_1	Chr13:8635709|8636097	0	431.885	0	0	0	179	MD13G1118100
MD13G1014800_1	Chr13:930556|930743	0	304.645	0	0	0	187	MD13G1014800
n/a_1469	Chr13:9637509|9641605	0	13.9084	0	0	0	4096	n/a
n/a_1470	Chr13:9701288|9710333	0	17.094	0	0	0	9045	n/a
n/a_1524	Chr14:11432606|11476010	0	2.1852	0	0	0	43404	n/a
MD14G1000100_2	Chr14:15217|15722	0	187.815	0	0	0	505	MD14G1000100
MD14G1104900_1	Chr14:16235157|16238656	0	99.7699	0	0	0	571	MD14G1104900
n/a_1502	Chr14:1672728|1701770	0	69.6366	0	0	0	29042	n/a
n/a_1503	Chr14:1673084|1701985	0	9.85582	0	0	0	28901	n/a
n/a_1504	Chr14:1674641|1703765	0	4.89018	0	0	0	29124	n/a
MD14G1119200_1	Chr14:19348026|19348178	0	374.794	0	0	0	152	MD14G1119200
MD14G1121800_1	Chr14:19651741|19652208	0	243.977	0	0	0	467	MD14G1121800
MD14G1122500_1	Chr14:19716712|19721265	0	69.8322	0	0	0	3261	MD14G1122500
MD14G1123200_1	Chr14:19768418|19768579	0	589.109	0	0	0	161	MD14G1123200
MD14G1147500_2	Chr14:24028717|24029125	0	231.899	0	0	0	409	MD14G1147500
n/a_1509	Chr14:2405005|2410686	0	20.0558	0	0	0	5681	n/a
MD14G1152400_3	Chr14:24665782|24665987	0	462.666	0	0	0	205	MD14G1152400
MD14G1162500_1	Chr14:25700008|25700161	0	757.916	0	0	0	153	MD14G1162500
MD14G1169100_1	Chr14:26265715|26269113	0	67.9904	0	0	0	1395	MD14G1169100
MD14G1169100_2	Chr14:26267017|26269113	0	52.9448	0	0	0	1076	MD14G1169100
n/a_1512	Chr14:2684300|2779908	0	1.21288	0	0	0	95608	n/a
MD14G1179400_1	Chr14:27204122|27204335	0	445.289	0	0	0	213	MD14G1179400
MD14G1183800_1	Chr14:27631670|27631901	0	821.183	0	0	0	231	MD14G1183800
MD14G1001500_1	Chr14:281197|281358	0	480.17	0	0	0	161	MD14G1001500
MD14G1191600_5	Chr14:28262874|28263133	0	219.956	0	0	0	259	MD14G1191600
MD14G1191600_6	Chr14:28264500|28266945	0	81.2053	0	0	0	952	MD14G1191600
n/a_1547	Chr14:29030095|29033803	0	30.7274	0	0	0	3708	n/a
MD14G1205000_1	Chr14:29265778|29265996	0	354.621	0	0	0	218	MD14G1205000
MD14G1209100_1	Chr14:29540389|29540599	0	677.476	0	0	0	210	MD14G1209100
MD14G1210700_1	Chr14:29633900|29634344	0	213.618	0	0	0	444	MD14G1210700
MD14G1214800_1	Chr14:29859032|29860007	0	106.087	0	0	0	537	MD14G1214800
MD14G1219700_2	Chr14:30204646|30206301	0	617.141	0	0	0	389	MD14G1219700
MD14G1219800_1	Chr14:30213970|30214144	0	545.095	0	0	0	174	MD14G1219800
n/a_1552	Chr14:30271154|30271479	0	237.869	0	0	0	325	n/a
MD14G1227900_1	Chr14:30890024|30890186	0	585.473	0	0	0	162	MD14G1227900
MD14G1228100_1	Chr14:30911637|30912825	0	47.9534	0	0	0	1188	MD14G1228100
MD14G1238900_1	Chr14:31807577|31807758	0	314.744	0	0	0	181	MD14G1238900
MD14G1239900_1	Chr14:31893292|31893478	0	415.631	0	0	0	186	MD14G1239900
MD14G1242400_2	Chr14:32101551|32102022	0	260.131	0	0	0	219	MD14G1242400
MD14G1246000_1	Chr14:32379724|32380072	0	222.148	0	0	0	348	MD14G1246000
MD14G1247500_1	Chr14:32499896|32500265	0	209.505	0	0	0	369	MD14G1247500
MD14G1002200_1	Chr14:354782|355206	0	480.642	0	0	0	296	MD14G1002200
MD14G1003900_1	Chr14:464730|464886	0	365.183	0	0	0	156	MD14G1003900
n/a_1520	Chr14:6415955|6422790	0	13.8766	0	0	0	6835	n/a
MD14G1060900_1	Chr14:6420464|6424683	0	53.744	0	0	0	1060	MD14G1060900
n/a_1521	Chr14:7423187|7463471	0	2.87859	0	0	0	40284	n/a
MD14G1075700_1	Chr14:8576615|8582029	0	243.196	0	0	0	390	MD14G1075700
MD14G1080200_1	Chr14:9164531|9165140	0	212.661	0	0	0	446	MD14G1080200
MD14G1081800_2	Chr14:9418623|9421552	0	69.3049	0	0	0	822	MD14G1081800
MD15G1138500_1	Chr15:10162658|10163365	0	217.156	0	0	0	534	MD15G1138500
MD15G1138500_2	Chr15:10165467|10165675	0	273.888	0	0	0	208	MD15G1138500
MD15G1140200_1	Chr15:10318292|10318526	0	904.203	0	0	0	234	MD15G1140200
MD15G1140800_3	Chr15:10397745|10397903	0	721.122	0	0	0	158	MD15G1140800
MD15G1142200_1	Chr15:10528813|10528989	0	439.247	0	0	0	176	MD15G1142200
MD15G1145300_1	Chr15:10761429|10761795	0	259.144	0	0	0	366	MD15G1145300
MD15G1146900_1	Chr15:10918380|10918539	0	358.293	0	0	0	159	MD15G1146900
n/a_1595	Chr15:10952997|10956299	0	267.418	0	0	0	3302	n/a
MD15G1153000_1	Chr15:11327561|11327741	0	474.738	0	0	0	180	MD15G1153000
MD15G1153000_2	Chr15:11327860|11328037	0	321.857	0	0	0	177	MD15G1153000
MD15G1153000_4	Chr15:11328302|11328482	0	429.486	0	0	0	180	MD15G1153000
MD15G1158500_1	Chr15:11773021|11773223	0	282.023	0	0	0	202	MD15G1158500
MD15G1159800_1	Chr15:11953533|11953691	0	360.561	0	0	0	158	MD15G1159800
MD15G1021000_1	Chr15:1213706|1213872	0	571.365	0	0	0	166	MD15G1021000
MD15G1021100_1	Chr15:1219333|1221264	0	84.489	0	0	0	915	MD15G1021100
MD15G1162500_1	Chr15:12239994|12241569	0	165.187	0	0	0	702	MD15G1162500
MD15G1162800_1	Chr15:12280784|12280945	0	1178.22	0	0	0	161	MD15G1162800
MD15G1163900_1	Chr15:12338584|12339392	0	119.015	0	0	0	718	MD15G1163900
MD15G1165500_1	Chr15:12449277|12449550	0	313.014	0	0	0	273	MD15G1165500
MD15G1165700_1	Chr15:12472369|12472614	0	315.541	0	0	0	245	MD15G1165700
n/a_1600	Chr15:13925957|13926130	0	658.597	0	0	0	173	n/a
MD15G1192800_1	Chr15:15206232|15207508	0	169.887	0	0	0	503	MD15G1192800
MD15G1195400_1	Chr15:15470392|15472672	0	404.906	0	0	0	872	MD15G1195400
MD15G1202100_1	Chr15:16099348|16099522	0	545.095	0	0	0	174	MD15G1202100
n/a_1557	Chr15:163351|163549	0	287.72	0	0	0	198	n/a
MD15G1223800_1	Chr15:18185175|18188241	0	71.0461	0	0	0	1335	MD15G1223800
MD15G1227400_1	Chr15:18483759|18484115	0	557.921	0	0	0	255	MD15G1227400
MD15G1228100_1	Chr15:18584916|18585261	0	165.126	0	0	0	345	MD15G1228100
MD15G1231200_1	Chr15:18926767|18926913	0	1051.8	0	0	0	147	MD15G1231200
MD15G1237500_1	Chr15:19546196|19546609	0	298.26	0	0	0	318	MD15G1237500
n/a_1608	Chr15:21192137|21192360	0	510.929	0	0	0	223	n/a
MD15G1257500_1	Chr15:21903052|21903306	0	373.412	0	0	0	254	MD15G1257500
MD15G1262500_1	Chr15:22444035|22444252	0	262.528	0	0	0	217	MD15G1262500
MD15G1272500_1	Chr15:23811381|23811586	0	462.666	0	0	0	205	MD15G1272500
MD15G1276700_1	Chr15:24318870|24319236	0	155.652	0	0	0	366	MD15G1276700
n/a_1564	Chr15:2478966|2486030	0	557.21	0	0	0	7064	n/a
MD15G1004400_2	Chr15:268492|269023	0	192.029	0	0	0	445	MD15G1004400
MD15G1293600_1	Chr15:27191276|27192061	0	72.5715	0	0	0	785	MD15G1293600
MD15G1311400_1	Chr15:31402159|31406008	0	118.479	0	0	0	1305	MD15G1311400
MD15G1311400_2	Chr15:31402159|31406600	0	36.2626	0	0	0	1571	MD15G1311400
MD15G1318400_1	Chr15:32883144|32886132	0	50.6823	0	0	0	2288	MD15G1318400
n/a_1618	Chr15:34495858|34527067	0	4.95418	0	0	0	31209	n/a
MD15G1324300_1	Chr15:34528510|34529380	0	638.905	0	0	0	121	MD15G1324300
MD15G1331800_1	Chr15:36797839|36798203	0	246.617	0	0	0	231	MD15G1331800
MD15G1333300_2	Chr15:36977635|36977839	0	378.958	0	0	0	204	MD15G1333300
MD15G1333600_1	Chr15:37102296|37102472	0	323.685	0	0	0	176	MD15G1333600
n/a_1620	Chr15:37127665|37127956	0	651.867	0	0	0	291	n/a
MD15G1336300_2	Chr15:37660847|37662097	0	112.778	0	0	0	841	MD15G1336300
MD15G1339500_1	Chr15:38374219|38374398	0	636.521	0	0	0	179	MD15G1339500
MD15G1351000_1	Chr15:41714435|41715945	0	40.0342	0	0	0	1423	MD15G1351000
MD15G1357100_1	Chr15:43070990|43072485	0	99.2485	0	0	0	861	MD15G1357100
n/a_1628	Chr15:43138759|43138925	0	571.365	0	0	0	166	n/a
MD15G1358500_1	Chr15:43235718|43235871	0	558.516	0	0	0	153	MD15G1358500
MD15G1364900_1	Chr15:44194618|44198642	0	26.0925	0	0	0	3275	MD15G1364900
MD15G1372700_1	Chr15:45520812|45525055	0	46.5684	0	0	0	1835	MD15G1372700
MD15G1373800_1	Chr15:45651810|45652259	0	318.138	0	0	0	243	MD15G1373800
MD15G1376500_1	Chr15:46069348|46069582	0	243.456	0	0	0	234	MD15G1376500
MD15G1381000_2	Chr15:46894667|46894854	0	1521.6	0	0	0	187	MD15G1381000
MD15G1381100_1	Chr15:46985277|46985458	0	314.744	0	0	0	181	MD15G1381100
MD15G1383200_1	Chr15:47202926|47203190	0	359.267	0	0	0	264	MD15G1383200
MD15G1385000_3	Chr15:47561566|47561791	0	343.589	0	0	0	225	MD15G1385000
MD15G1403700_2	Chr15:50463415|50464113	0	107.084	0	0	0	532	MD15G1403700
n/a_1640	Chr15:50753944|50777758	0	2.39223	0	0	0	23814	n/a
MD15G1411000_1	Chr15:51042897|51043484	0	203.441	0	0	0	380	MD15G1411000
n/a_1656	Chr15:52721199|52753599	0	1.75829	0	0	0	32400	n/a
MD15G1427500_1	Chr15:52800012|52803025	0	50.9103	0	0	0	1119	MD15G1427500
MD15G1427500_3	Chr15:52805876|52807347	0	215.56	0	0	0	440	MD15G1427500
MD15G1428100_1	Chr15:52868073|52868704	0	109.978	0	0	0	518	MD15G1428100
MD15G1096900_1	Chr15:6763931|6764340	0	628.123	0	0	0	302	MD15G1096900
n/a_1572	Chr15:6902881|6904428	0	99.945	0	0	0	1547	n/a
MD15G1114500_1	Chr15:8078174|8079314	0	107.691	0	0	0	529	MD15G1114500
MD15G1130200_1	Chr15:9416272|9417593	0	93.6984	0	0	0	1216	MD15G1130200
MD15G1130200_2	Chr15:9421610|9422057	0	226.066	0	0	0	252	MD15G1130200
MD15G1130800_6	Chr15:9445771|9446008	0	240.374	0	0	0	237	MD15G1130800
MD15G1131000_1	Chr15:9466871|9467099	0	415.994	0	0	0	228	MD15G1131000
MD15G1131300_1	Chr15:9482346|9483172	0	151.512	0	0	0	564	MD15G1131300
MD15G1133500_1	Chr15:9680012|9680193	0	427.113	0	0	0	181	MD15G1133500
MD15G1017300_1	Chr15:995192|995342	0	515.383	0	0	0	150	MD15G1017300
MD16G1131900_2	Chr16:10061442|10062347	0	113.354	0	0	0	682	MD16G1131900
MD16G1132100_1	Chr16:10072605|10072838	0	356.054	0	0	0	160	MD16G1132100
MD16G1013200_1	Chr16:1008093|1008413	0	234.439	0	0	0	243	MD16G1013200
MD16G1132300_4	Chr16:10089589|10089777	0	303.025	0	0	0	188	MD16G1132300
MD16G1013200_2	Chr16:1010747|1010896	0	1909.66	0	0	0	149	MD16G1013200
n/a_1705	Chr16:10347354|10371280	0	9.52414	0	0	0	23926	n/a
n/a_1706	Chr16:10348540|10372674	0	3.54077	0	0	0	24134	n/a
MD16G1136800_1	Chr16:10455971|10456438	0	314.744	0	0	0	362	MD16G1136800
MD16G1152800_1	Chr16:12079219|12079390	0	499.725	0	0	0	171	MD16G1152800
n/a_1717	Chr16:12849059|12850281	0	77.6159	0	0	0	1222	n/a
MD16G1175900_1	Chr16:14917536|14917689	0	1859.74	0	0	0	153	MD16G1175900
n/a_1724	Chr16:15626346|15638984	0	18.0309	0	0	0	12638	n/a
MD16G1184300_2	Chr16:15832403|15832553	0	632.311	0	0	0	150	MD16G1184300
MD16G1022300_1	Chr16:1613757|1614055	0	272.577	0	0	0	209	MD16G1022300
MD16G1187800_1	Chr16:16289394|16290942	0	92.8061	0	0	0	833	MD16G1187800
MD16G1191200_1	Chr16:16738704|16738930	0	684.137	0	0	0	226	MD16G1191200
MD16G1191200_2	Chr16:16739398|16739618	0	258.948	0	0	0	220	MD16G1191200
MD16G1194200_1	Chr16:17220301|17220496	0	396.448	0	0	0	195	MD16G1194200
MD16G1200100_1	Chr16:18096203|18096741	0	393.089	0	0	0	295	MD16G1200100
MD16G1202300_1	Chr16:18399121|18400199	0	319.349	0	0	0	297	MD16G1202300
MD16G1202300_2	Chr16:18399249|18400352	0	294.555	0	0	0	322	MD16G1202300
MD16G1209600_1	Chr16:19831168|19831818	0	148.099	0	0	0	522	MD16G1209600
MD16G1211400_1	Chr16:20010970|20011133	0	581.881	0	0	0	163	MD16G1211400
n/a_1676	Chr16:2012225|2012427	0	282.023	0	0	0	202	n/a
MD16G1031000_1	Chr16:2213196|2213355	0	596.52	0	0	0	159	MD16G1031000
MD16G1004000_1	Chr16:225000|225349	0	332.267	0	0	0	349	MD16G1004000
MD16G1000100_1	Chr16:2302|4764	0	93.9075	0	0	0	1010	MD16G1000100
MD16G1229100_1	Chr16:23394368|23394549	0	427.113	0	0	0	181	MD16G1229100
MD16G1033300_1	Chr16:2414428|2414656	0	249.862	0	0	0	228	MD16G1033300
n/a_1741	Chr16:24522656|24526568	0	48.4901	0	0	0	3912	n/a
MD16G1240600_1	Chr16:26000550|26000821	0	210.216	0	0	0	271	MD16G1240600
MD16G1246300_1	Chr16:27249850|27250000	0	773.074	0	0	0	150	MD16G1246300
MD16G1247000_2	Chr16:27417605|27418746	0	1056.11	0	0	0	183	MD16G1247000
MD16G1248400_1	Chr16:27742868|27743024	0	547.775	0	0	0	156	MD16G1248400
MD16G1250100_2	Chr16:28023479|28025285	0	82.619	0	0	0	1148	MD16G1250100
MD16G1042100_1	Chr16:2962963|2963309	0	326.192	0	0	0	237	MD16G1042100
MD16G1259300_2	Chr16:31613563|31613943	0	149.917	0	0	0	380	MD16G1259300
n/a_1680	Chr16:3243283|3275448	0	36.3083	0	0	0	32165	n/a
n/a_1681	Chr16:3423694|3423940	0	231.58	0	0	0	246	n/a
MD16G1269000_1	Chr16:34748293|34749127	0	113.725	0	0	0	834	MD16G1269000
MD16G1049500_1	Chr16:3481942|3482122	0	316.492	0	0	0	180	MD16G1049500
MD16G1270100_1	Chr16:34956995|34958055	0	154.725	0	0	0	613	MD16G1270100
MD16G1280700_1	Chr16:38248263|38248424	0	589.109	0	0	0	161	MD16G1280700
MD16G1282700_1	Chr16:38704132|38706733	0	121.911	0	0	0	778	MD16G1282700
Apple_newGene_17958_1	Chr16:38918691|38918889	0	1437.07	0	0	0	198	Apple_newGene_17958
Apple_newGene_17958_3	Chr16:38918822|38919107	0	271.254	0	0	0	285	Apple_newGene_17958
Apple_newGene_17957_8	Chr16:38919031|38919308	0	205.663	0	0	0	277	Apple_newGene_17957
n/a_1745	Chr16:40220113|40220282	0	561.222	0	0	0	169	n/a
MD16G1284000_1	Chr16:40234360|40234715	0	435.535	0	0	0	355	MD16G1284000
MD16G1059500_1	Chr16:4275362|4275774	0	235.693	0	0	0	328	MD16G1059500
MD16G1060200_1	Chr16:4322105|4322939	0	136.072	0	0	0	628	MD16G1060200
MD16G1069300_1	Chr16:4888030|4888197	0	341.129	0	0	0	167	MD16G1069300
MD16G1073200_1	Chr16:5140535|5140694	0	483.172	0	0	0	160	MD16G1073200
MD16G1075200_1	Chr16:5261844|5262039	0	729.589	0	0	0	195	MD16G1075200
n/a_1690	Chr16:5772998|5789430	0	50.4892	0	0	0	16432	n/a
MD16G1086700_1	Chr16:6024284|6025352	0	143.137	0	0	0	398	MD16G1086700
MD16G1009200_1	Chr16:659525|659919	0	144.59	0	0	0	394	MD16G1009200
MD16G1095400_1	Chr16:6595667|6596688	0	232.088	0	0	0	613	MD16G1095400
MD16G1103100_2	Chr16:7224885|7225785	0	609.921	0	0	0	507	MD16G1103100
MD16G1104800_1	Chr16:7366008|7366170	0	878.209	0	0	0	162	MD16G1104800
MD16G1104800_2	Chr16:7366170|7366335	0	468.53	0	0	0	165	MD16G1104800
MD16G1106700_1	Chr16:7494876|7496261	0	157.031	0	0	0	604	MD16G1106700
MD16G1107600_1	Chr16:7536241|7537412	0	256.615	0	0	0	444	MD16G1107600
MD16G1109700_1	Chr16:7707964|7708128	0	347.37	0	0	0	164	MD16G1109700
n/a_1702	Chr16:7873111|7874095	0	192.778	0	0	0	984	n/a
n/a_1703	Chr16:8599681|8599831	0	379.791	0	0	0	150	n/a
MD16G1011700_1	Chr16:899292|899497	0	416.844	0	0	0	205	MD16G1011700
MD16G1001600_1	Chr16:99210|99633	0	196.444	0	0	0	290	MD16G1001600
n/a_1790	Chr17:10567983|10638520	0	1.61528	0	0	0	70537	n/a
MD17G1128600_1	Chr17:11288888|11289067	0	529.869	0	0	0	179	MD17G1128600
MD17G1128600_3	Chr17:11294546|11294715	0	457.441	0	0	0	169	MD17G1128600
n/a_1803	Chr17:12912701|12915214	0	30.763	0	0	0	2513	n/a
MD17G1151000_1	Chr17:13923638|13923926	0	671.072	0	0	0	288	MD17G1151000
MD17G1155300_1	Chr17:14790852|14791626	0	173.712	0	0	0	546	MD17G1155300
MD17G1019700_1	Chr17:1506773|1506962	0	501.834	0	0	0	189	MD17G1019700
MD17G1157000_1	Chr17:15121624|15121866	0	235.408	0	0	0	242	MD17G1157000
MD17G1020800_1	Chr17:1565835|1566164	0	234.977	0	0	0	329	MD17G1020800
n/a_1755	Chr17:1622015|1626135	0	115.105	0	0	0	4120	n/a
n/a_1756	Chr17:1622327|1626387	0	140.167	0	0	0	4060	n/a
MD17G1170400_1	Chr17:17461166|17461811	0	135.963	0	0	0	419	MD17G1170400
MD17G1171000_1	Chr17:17518735|17519483	0	269.364	0	0	0	287	MD17G1171000
MD17G1027400_5	Chr17:1963112|1963280	0	339.099	0	0	0	168	MD17G1027400
MD17G1027400_10	Chr17:1970828|1973063	0	46.1541	0	0	0	2055	MD17G1027400
MD17G1027400_12	Chr17:1972526|1972700	0	491.109	0	0	0	174	MD17G1027400
MD17G1178100_3	Chr17:20386205|20386690	0	191.17	0	0	0	298	MD17G1178100
n/a_1808	Chr17:21003167|21033145	0	9.02582	0	0	0	29978	n/a
MD17G1184200_1	Chr17:21751354|21751511	0	362.857	0	0	0	157	MD17G1184200
MD17G1030900_2	Chr17:2232562|2232768	0	276.547	0	0	0	206	MD17G1030900
MD17G1032200_2	Chr17:2345585|2346013	0	364.795	0	0	0	260	MD17G1032200
MD17G1208100_1	Chr17:25088438|25088804	0	155.228	0	0	0	367	MD17G1208100
MD17G1211400_1	Chr17:25664011|25664164	0	744.688	0	0	0	153	MD17G1211400
MD17G1213700_1	Chr17:26070647|26071598	0	125.482	0	0	0	454	MD17G1213700
n/a_1813	Chr17:26381715|26387907	0	12.4851	0	0	0	6192	n/a
MD17G1219400_1	Chr17:26734659|26734826	0	341.129	0	0	0	167	MD17G1219400
MD17G1219800_1	Chr17:26771296|26771614	0	298.26	0	0	0	318	MD17G1219800
MD17G1230200_1	Chr17:27822099|27822589	0	151.512	0	0	0	376	MD17G1230200
n/a_1814	Chr17:27971830|28029809	0	8.00022	0	0	0	57979	n/a
MD17G1234500_1	Chr17:28356454|28356605	0	377.276	0	0	0	151	MD17G1234500
MD17G1241700_1	Chr17:29094234|29094572	0	280.611	0	0	0	338	MD17G1241700
Apple_newGene_21100_1	Chr17:29146296|29146462	0	465.708	0	0	0	166	Apple_newGene_21100
MD17G1244700_1	Chr17:29318720|29319150	0	252.639	0	0	0	306	MD17G1244700
MD17G1266600_2	Chr17:32702679|32703072	0	241.34	0	0	0	393	MD17G1266600
n/a_1839	Chr17:33584920|33677216	0	1.02764	0	0	0	92296	n/a
n/a_1842	Chr17:33634065|33664097	0	9.47455	0	0	0	30032	n/a
n/a_1846	Chr17:33690443|33692627	0	52.1691	0	0	0	2184	n/a
MD17G1285800_1	Chr17:34484547|34485904	0	303.347	0	0	0	469	MD17G1285800
n/a_1847	Chr17:34652022|34657982	0	4384.21	0	0	0	5960	n/a
n/a_1848	Chr17:34652585|34658558	0	1967.31	0	0	0	5973	n/a
MD17G1053400_1	Chr17:4153571|4153789	0	260.131	0	0	0	219	MD17G1053400
MD17G1054600_1	Chr17:4219563|4219720	0	362.857	0	0	0	157	MD17G1054600
MD17G1058500_1	Chr17:4770269|4770469	0	284.843	0	0	0	200	MD17G1058500
MD17G1068900_1	Chr17:5578604|5578889	0	665.59	0	0	0	285	MD17G1068900
MD17G1072100_1	Chr17:5787313|5787699	0	301.954	0	0	0	283	MD17G1072100
MD17G1074800_1	Chr17:6064684|6066056	0	127.57	0	0	0	606	MD17G1074800
MD17G1077800_1	Chr17:6426796|6426954	0	540.841	0	0	0	158	MD17G1077800
n/a_1776	Chr17:6430123|6449860	0	2.88639	0	0	0	19737	n/a
MD17G1081400_1	Chr17:6801600|6802278	0	144.958	0	0	0	393	MD17G1081400
MD17G1089900_2	Chr17:7375535|7376050	0	327.406	0	0	0	174	MD17G1089900
MD17G1101600_1	Chr17:8629862|8630706	0	137.232	0	0	0	845	MD17G1101600
MD17G1104000_1	Chr17:8805823|8806098	0	207.159	0	0	0	275	MD17G1104000
MD17G1110200_3	Chr17:9498574|9499060	0	159.069	0	0	0	486	MD17G1110200
MD17G1110200_4	Chr17:9498591|9498836	0	315.541	0	0	0	245	MD17G1110200
MD17G1110200_5	Chr17:9498734|9498890	0	1043.34	0	0	0	156	MD17G1110200
MD17G1110200_6	Chr17:9498734|9499185	0	210.303	0	0	0	451	MD17G1110200
MD17G1110200_8	Chr17:9498772|9499060	0	466.236	0	0	0	288	MD17G1110200
MD17G1110200_9	Chr17:9498772|9499093	0	481.666	0	0	0	321	MD17G1110200
MD17G1110200_10	Chr17:9498787|9499006	0	649.634	0	0	0	219	MD17G1110200
MD17G1110200_12	Chr17:9498787|9499060	0	6789.27	0	0	0	273	MD17G1110200
MD17G1110200_14	Chr17:9498796|9499027	0	2154.44	0	0	0	231	MD17G1110200
MD17G1110200_17	Chr17:9498833|9499085	0	226.066	0	0	0	252	MD17G1110200
MD17G1110200_18	Chr17:9498844|9499027	0	940.733	0	0	0	183	MD17G1110200
MD17G1110200_19	Chr17:9498847|9499027	0	2723.92	0	0	0	180	MD17G1110200
MD17G1110200_20	Chr17:9498847|9499072	0	1193.57	0	0	0	225	MD17G1110200
MD17G1110200_21	Chr17:9498862|9499027	0	2895.81	0	0	0	165	MD17G1110200
MD17G1110200_22	Chr17:9498890|9499100	0	1681.32	0	0	0	210	MD17G1110200
MD17G1110200_23	Chr17:9498919|9499093	0	771.702	0	0	0	174	MD17G1110200
MD17G1110200_24	Chr17:9498925|9499093	0	564.563	0	0	0	168	MD17G1110200
MD17G1110200_26	Chr17:9499027|9499201	0	2584.07	0	0	0	174	MD17G1110200
MD17G1110200_27	Chr17:9499034|9499201	0	925.838	0	0	0	167	MD17G1110200

## Sheet: Table S7-4
Table S7-4 Expression of circRNAs in leaf only
New_ID	circRNA_ID	Flower	Phloem	Leaf	Root	Fruit	geneLength	gene_id
MD00G1000600_1	Chr00:102227|103004	0	0	1280.38	0	0	219	MD00G1000600
MD00G1007700_2	Chr00:1034769|1035448	0	0	412.357	0	0	680	MD00G1007700
n/a_24	Chr00:11246645|11254759	0	0	28.1129	0	0	8114	n/a
MD00G1066300_1	Chr00:12765930|12766152	0	0	411.005	0	0	222	MD00G1066300
MD00G1068600_1	Chr00:13454960|13455880	0	0	370.889	0	0	334	MD00G1068600
MD00G1076400_1	Chr00:15360704|15361191	0	0	304.144	0	0	300	MD00G1076400
MD00G1089100_1	Chr00:18279929|18280100	0	0	1600.76	0	0	171	MD00G1089100
MD00G1091800_2	Chr00:19234229|19236745	0	0	96.9303	0	0	1278	MD00G1091800
MD00G1098400_1	Chr00:20510713|20511399	0	0	180.579	0	0	686	MD00G1098400
MD00G1107100_1	Chr00:22454501|22456731	0	0	162.364	0	0	1727	MD00G1107100
MD00G1110400_1	Chr00:23083759|23084662	0	0	382.281	0	0	489	MD00G1110400
MD00G1110500_1	Chr00:23087153|23087990	0	0	109.012	0	0	837	MD00G1110500
n/a_26	Chr00:24295639|24322183	0	0	3.43743	0	0	26544	n/a
MD00G1114600_1	Chr00:24319288|24321676	0	0	80.7542	0	0	2301	MD00G1114600
n/a_27	Chr00:24663551|24663829	0	0	672.429	0	0	278	n/a
MD00G1126900_1	Chr00:26929838|26930192	0	0	1056.13	0	0	354	MD00G1126900
MD00G1148100_1	Chr00:32474642|32475592	0	0	200.773	0	0	617	MD00G1148100
n/a_28	Chr00:33378671|33379642	0	0	385.037	0	0	971	n/a
MD00G1159900_1	Chr00:35391897|35392189	0	0	640.19	0	0	292	MD00G1159900
n/a_10	Chr00:3731398|3734758	0	0	36.8681	0	0	3360	n/a
MD00G1020700_1	Chr00:3732231|3732444	0	0	581.582	0	0	213	MD00G1020700
MD00G1020700_3	Chr00:3733296|3733509	0	0	428.372	0	0	213	MD00G1020700
MD00G1170900_1	Chr00:39313551|39313734	0	0	747.895	0	0	183	MD00G1170900
MD00G1176300_1	Chr00:40809289|40809621	0	0	412.243	0	0	332	MD00G1176300
MD00G1191800_1	Chr00:46496424|46497534	0	0	301.404	0	0	411	MD00G1191800
MD00G1191800_2	Chr00:46496447|46497534	0	0	319.27	0	0	388	MD00G1191800
MD00G1030000_1	Chr00:4854144|4857839	0	0	105.119	0	0	868	MD00G1030000
MD00G1214200_1	Chr00:51075492|51077957	0	0	194.043	0	0	1596	MD00G1214200
MD00G1040500_2	Chr00:6917997|6918231	0	0	389.928	0	0	234	MD00G1040500
MD00G1041900_1	Chr00:7638284|7643895	0	0	100.713	0	0	1845	MD00G1041900
MD00G1050200_1	Chr00:9542010|9542337	0	0	353.656	0	0	258	MD00G1050200
MD00G1053300_1	Chr00:9952391|9955228	0	0	389.55	0	0	318	MD00G1053300
MD01G1035300_1	Chr01:11968060|11968210	0	0	608.288	0	0	150	MD01G1035300
MD01G1004100_1	Chr01:1332218|1333619	0	0	152.326	0	0	599	MD01G1004100
MD01G1044100_1	Chr01:14342422|14343419	0	0	333.004	0	0	411	MD01G1044100
MD01G1049200_1	Chr01:15197490|15197704	0	0	9178.42	0	0	130	MD01G1049200
MD01G1051100_3	Chr01:15474650|15474997	0	0	482.011	0	0	257	MD01G1051100
MD01G1059300_1	Chr01:16305919|16306607	0	0	255.583	0	0	357	MD01G1059300
MD01G1060600_1	Chr01:16420579|16420774	0	0	635.266	0	0	195	MD01G1060600
MD01G1070000_1	Chr01:17416240|17416793	0	0	338.039	0	0	553	MD01G1070000
MD01G1072900_1	Chr01:17806397|17806557	0	0	570.27	0	0	160	MD01G1072900
MD01G1078900_1	Chr01:18592445|18592683	0	0	785.443	0	0	238	MD01G1078900
MD01G1082200_1	Chr01:18864798|18864988	0	0	480.227	0	0	190	MD01G1082200
MD01G1083800_2	Chr01:19021228|19021447	0	0	565.648	0	0	219	MD01G1083800
n/a_46	Chr01:19181779|19184872	0	0	29.4999	0	0	3093	n/a
MD01G1100600_1	Chr01:21374299|21376999	0	0	45.8804	0	0	2700	MD01G1100600
MD01G1101700_1	Chr01:21449560|21450051	0	0	335.453	0	0	408	MD01G1101700
MD01G1102600_3	Chr01:21489219|21489416	0	0	463.163	0	0	197	MD01G1102600
MD01G1104700_1	Chr01:21792592|21792824	0	0	393.289	0	0	232	MD01G1104700
n/a_62	Chr01:22188540|22195146	0	0	28.1283	0	0	6606	n/a
MD01G1111300_1	Chr01:22385997|22386306	0	0	295.285	0	0	309	MD01G1111300
MD01G1113000_1	Chr01:22698835|22699027	0	0	645.192	0	0	192	MD01G1113000
MD01G1116700_1	Chr01:23035266|23037157	0	0	442.928	0	0	618	MD01G1116700
MD01G1126500_1	Chr01:23822006|23822177	0	0	533.586	0	0	171	MD01G1126500
MD01G1133500_1	Chr01:24335407|24335642	0	0	388.269	0	0	235	MD01G1133500
MD01G1145200_1	Chr01:25531546|25531813	0	0	463.959	0	0	267	MD01G1145200
n/a_71	Chr01:25914990|25925094	0	0	18.3903	0	0	10104	n/a
n/a_73	Chr01:26607113|26612576	0	0	25.053	0	0	5463	n/a
MD01G1164000_1	Chr01:26869367|26869573	0	0	907.453	0	0	206	MD01G1164000
MD01G1165900_1	Chr01:26990117|26990971	0	0	213.95	0	0	579	MD01G1165900
MD01G1168200_1	Chr01:27263370|27263657	0	0	1181.17	0	0	287	MD01G1168200
MD01G1186100_1	Chr01:28485066|28485576	0	0	733.08	0	0	510	MD01G1186100
MD01G1187600_1	Chr01:28611164|28611316	0	0	600.284	0	0	152	MD01G1187600
MD01G1190700_1	Chr01:28924692|28925317	0	0	372.381	0	0	502	MD01G1190700
n/a_96	Chr01:29260968|29272256	0	0	99.3632	0	0	11288	n/a
MD01G1205000_1	Chr01:30043432|30044170	0	0	268.362	0	0	340	MD01G1205000
MD01G1206300_1	Chr01:30165360|30165518	0	0	577.488	0	0	158	MD01G1206300
MD01G1207500_1	Chr01:30264440|30265929	0	0	206.806	0	0	599	MD01G1207500
MD01G1209900_1	Chr01:30398849|30399046	0	0	628.817	0	0	197	MD01G1209900
n/a_103	Chr01:30957206|31007243	0	0	5.60391	0	0	50037	n/a
MD01G1218300_1	Chr01:31063397|31064334	0	0	249.249	0	0	497	MD01G1218300
MD01G1218300_2	Chr01:31066541|31066758	0	0	570.862	0	0	217	MD01G1218300
MD01G1220200_1	Chr01:31235058|31235277	0	0	416.635	0	0	219	MD01G1220200
MD01G1223200_1	Chr01:31505903|31506410	0	0	388.269	0	0	235	MD01G1223200
MD01G1224900_2	Chr01:31583292|31583445	0	0	804.396	0	0	154	MD01G1224900
MD01G1232600_1	Chr01:32101561|32101894	0	0	411.005	0	0	333	MD01G1232600
n/a_109	Chr01:32266675|32283069	0	0	7.55624	0	0	16394	n/a
MD01G1238300_1	Chr01:32472062|32472292	0	0	538.595	0	0	230	MD01G1238300
MD01G1017700_1	Chr01:7758534|7759284	0	0	330.339	0	0	750	MD01G1017700
MD01G1017900_1	Chr01:7791570|7796422	0	0	77.5218	0	0	1177	MD01G1017900
MD02G1137500_1	Chr02:11486044|11486289	0	0	1126.15	0	0	110	MD02G1137500
MD02G1016700_1	Chr02:1256998|1257166	0	0	737.363	0	0	168	MD02G1016700
MD02G1157800_2	Chr02:13190573|13190800	0	0	401.952	0	0	227	MD02G1157800
MD02G1157800_3	Chr02:13190632|13190830	0	0	938.462	0	0	198	MD02G1157800
MD02G1157800_4	Chr02:13190800|13191597	0	0	453.762	0	0	273	MD02G1157800
MD02G1018000_1	Chr02:1336554|1336738	0	0	1683.11	0	0	184	MD02G1018000
MD02G1166800_2	Chr02:14311993|14312236	0	0	769.281	0	0	243	MD02G1166800
MD02G1176000_1	Chr02:15502754|15503028	0	0	333.004	0	0	274	MD02G1176000
MD02G1182600_1	Chr02:16471876|16472117	0	0	1163.5	0	0	241	MD02G1182600
MD02G1190200_1	Chr02:17532087|17532776	0	0	660.677	0	0	375	MD02G1190200
MD02G1194100_1	Chr02:18481077|18481291	0	0	1310.29	0	0	214	MD02G1194100
MD02G1199700_1	Chr02:19651157|19651962	0	0	236.381	0	0	386	MD02G1199700
n/a_116	Chr02:198350|208572	0	0	21.0448	0	0	10222	n/a
MD02G1206000_1	Chr02:20753550|20754001	0	0	422.422	0	0	216	MD02G1206000
MD02G1206000_2	Chr02:20755842|20757774	0	0	229.254	0	0	597	MD02G1206000
MD02G1210400_1	Chr02:21932225|21932399	0	0	711.937	0	0	174	MD02G1210400
MD02G1029300_1	Chr02:2264286|2265329	0	0	87.4814	0	0	1043	MD02G1029300
MD02G1213500_2	Chr02:23303159|23304130	0	0	358.026	0	0	346	MD02G1213500
MD02G1226500_1	Chr02:26647538|26648432	0	0	180.054	0	0	688	MD02G1226500
MD02G1226500_2	Chr02:26649011|26649576	0	0	320.925	0	0	386	MD02G1226500
n/a_259	Chr02:27659397|27659554	0	0	581.167	0	0	157	n/a
MD02G1242600_1	Chr02:29295595|29295821	0	0	1249.91	0	0	73	MD02G1242600
n/a_270	Chr02:30540588|30586354	0	0	1.99369	0	0	45766	n/a
n/a_287	Chr02:32078238|32078523	0	0	320.151	0	0	285	n/a
MD02G1267400_1	Chr02:32171796|32171957	0	0	769.422	0	0	161	MD02G1267400
n/a_290	Chr02:32602779|32609509	0	0	18.4067	0	0	6730	n/a
MD02G1004700_1	Chr02:326418|326598	0	0	506.906	0	0	180	MD02G1004700
MD02G1040300_1	Chr02:3283343|3283498	0	0	1177.33	0	0	155	MD02G1040300
MD02G1275200_1	Chr02:32942166|32942337	0	0	1811.07	0	0	171	MD02G1275200
n/a_302	Chr02:34454111|34454271	0	0	1168.35	0	0	160	n/a
MD02G1290300_1	Chr02:34615516|34616287	0	0	897.659	0	0	138	MD02G1290300
MD02G1292200_1	Chr02:34813897|34814235	0	0	366.5	0	0	338	MD02G1292200
n/a_303	Chr02:34814026|34832176	0	0	25.5035	0	0	18150	n/a
n/a_304	Chr02:34814083|34832233	0	0	67.2927	0	0	18150	n/a
MD02G1297300_2	Chr02:35252314|35252777	0	0	532.579	0	0	351	MD02G1297300
MD02G1298200_1	Chr02:35314575|35315227	0	0	999.654	0	0	187	MD02G1298200
n/a_307	Chr02:35453387|35460938	0	0	24.1672	0	0	7551	n/a
MD02G1300000_1	Chr02:35474167|35474360	0	0	968.577	0	0	193	MD02G1300000
MD02G1306700_1	Chr02:35994341|35994685	0	0	684.403	0	0	181	MD02G1306700
MD02G1315300_1	Chr02:37015937|37016162	0	0	825.846	0	0	225	MD02G1315300
n/a_320	Chr02:37411521|37411696	0	0	521.389	0	0	175	n/a
MD02G1048800_3	Chr02:3843436|3843856	0	0	424.236	0	0	292	MD02G1048800
MD02G1061700_1	Chr02:4951412|4951581	0	0	733	0	0	169	MD02G1061700
MD02G1067300_1	Chr02:5510298|5510733	0	0	763.001	0	0	245	MD02G1067300
n/a_170	Chr02:5669870|5697233	0	0	6.83168	0	0	27363	n/a
Apple_newGene_21981_6	Chr02:5806095|5807135	0	0	137.277	0	0	997	Apple_newGene_21981
n/a_183	Chr02:5997995|6018120	0	0	6.80073	0	0	20125	n/a
n/a_186	Chr02:6138593|6166287	0	0	6.70959	0	0	27694	n/a
n/a_189	Chr02:6605119|6606170	0	0	1172.01	0	0	1051	n/a
MD02G1088500_1	Chr02:6978006|6979523	0	0	146.458	0	0	623	MD02G1088500
MD02G1094600_1	Chr02:7501206|7501436	0	0	3494.12	0	0	107	MD02G1094600
MD02G1096100_1	Chr02:7600716|7600869	0	0	596.36	0	0	153	MD02G1096100
MD02G1012500_2	Chr02:783591|791943	0	0	74.8049	0	0	1656	MD02G1012500
MD02G1119100_3	Chr02:9657122|9658733	0	0	289.884	0	0	641	MD02G1119100
MD02G1121800_2	Chr02:9924408|9925055	0	0	480.227	0	0	190	MD02G1121800
n/a_393	Chr03:10066179|10066485	0	0	610.9	0	0	306	n/a
MD03G1121600_1	Chr03:11306579|11309687	0	0	34.1223	0	0	2674	MD03G1121600
MD03G1121600_2	Chr03:11311348|11312875	0	0	73.4647	0	0	1242	MD03G1121600
MD03G1125200_1	Chr03:11818360|11818524	0	0	1139.85	0	0	164	MD03G1125200
n/a_332	Chr03:1228996|1257779	0	0	10.7596	0	0	28783	n/a
MD03G1020600_1	Chr03:1590083|1591330	0	0	154.649	0	0	590	MD03G1020600
MD03G1159100_1	Chr03:18890792|18891193	0	0	872.373	0	0	284	MD03G1159100
MD03G1159600_1	Chr03:19042797|19043683	0	0	205.734	0	0	887	MD03G1159600
MD03G1161700_1	Chr03:19548217|19549627	0	0	83.3271	0	0	1095	MD03G1161700
MD03G1161700_2	Chr03:19557430|19560462	0	0	139.922	0	0	1336	MD03G1161700
MD03G1163600_2	Chr03:20391857|20392188	0	0	563.058	0	0	332	MD03G1163600
MD03G1025100_1	Chr03:2076319|2077366	0	0	217.838	0	0	853	MD03G1025100
n/a_400	Chr03:22242632|22242814	0	0	1002.67	0	0	182	n/a
n/a_404	Chr03:22369749|22385058	0	0	8.09177	0	0	15309	n/a
MD03G1168700_1	Chr03:22808784|22809210	0	0	214.186	0	0	426	MD03G1168700
n/a_405	Chr03:23088253|23088520	0	0	695.938	0	0	267	n/a
MD03G1173900_1	Chr03:23799173|23800282	0	0	370.889	0	0	668	MD03G1173900
n/a_417	Chr03:24828369|24869217	0	0	2.23372	0	0	40848	n/a
n/a_422	Chr03:26297306|26324247	0	0	6.93869	0	0	26941	n/a
MD03G1199100_1	Chr03:27260003|27260177	0	0	1854.48	0	0	174	MD03G1199100
MD03G1034300_1	Chr03:2746962|2748082	0	0	1999.31	0	0	187	MD03G1034300
MD03G1034300_4	Chr03:2746979|2755047	0	0	16.1578	0	0	5647	MD03G1034300
n/a_428	Chr03:27604102|27615621	0	0	63.3688	0	0	11519	n/a
n/a_354	Chr03:2762539|2775672	0	0	9.43249	0	0	13133	n/a
MD03G1036600_4	Chr03:2908282|2908452	0	0	536.724	0	0	170	MD03G1036600
n/a_355	Chr03:3003056|3087807	0	0	3.65414	0	0	84751	n/a
MD03G1217600_1	Chr03:30224376|30224543	0	0	1483.56	0	0	167	MD03G1217600
MD03G1218900_1	Chr03:30340044|30340323	0	0	1425.11	0	0	279	MD03G1218900
n/a_430	Chr03:30589517|30589822	0	0	919.354	0	0	305	n/a
MD03G1231300_1	Chr03:31695068|31696278	0	0	217.71	0	0	569	MD03G1231300
MD03G1234000_1	Chr03:31972591|31972750	0	0	1168.65	0	0	159	MD03G1234000
MD03G1236100_1	Chr03:32175316|32175475	0	0	860.784	0	0	159	MD03G1236100
MD03G1004100_1	Chr03:322680|324722	0	0	153.503	0	0	1614	MD03G1004100
MD03G1041000_1	Chr03:3261609|3263150	0	0	729.221	0	0	295	MD03G1041000
MD03G1241400_1	Chr03:32629996|32633040	0	0	123.972	0	0	736	MD03G1241400
n/a_437	Chr03:32746961|32771202	0	0	11.5673	0	0	24241	n/a
MD03G1244400_1	Chr03:33116285|33116423	0	0	1354.6	0	0	138	MD03G1244400
MD03G1246300_3	Chr03:33335490|33336884	0	0	305.869	0	0	405	MD03G1246300
n/a_442	Chr03:33891467|33900907	0	0	19.3312	0	0	9440	n/a
MD03G1277100_1	Chr03:35959568|35959674	0	0	1763.54	0	0	106	MD03G1277100
MD03G1291500_1	Chr03:36901702|36901885	0	0	1015.95	0	0	184	MD03G1291500
MD03G1291500_2	Chr03:36902926|36903320	0	0	694.745	0	0	394	MD03G1291500
n/a_470	Chr03:37007126|37021931	0	0	111.859	0	0	14805	n/a
n/a_471	Chr03:37051086|37051236	0	0	608.288	0	0	150	n/a
n/a_366	Chr03:3945121|3957131	0	0	15.565	0	0	12010	n/a
MD03G1058800_1	Chr03:4742570|4743221	0	0	419.138	0	0	446	MD03G1058800
n/a_372	Chr03:5086357|5103783	0	0	24.8806	0	0	17426	n/a
n/a_375	Chr03:5372253|5383458	0	0	91.7577	0	0	11205	n/a
n/a_376	Chr03:5372484|5383689	0	0	20.3577	0	0	11205	n/a
MD03G1078000_1	Chr03:6324457|6324896	0	0	425.821	0	0	439	MD03G1078000
MD03G1088400_1	Chr03:7306034|7308044	0	0	89.636	0	0	1382	MD03G1088400
MD03G1089900_1	Chr03:7393025|7393293	0	0	697.52	0	0	268	MD03G1089900
MD03G1103300_1	Chr03:8833025|8834997	0	0	126.923	0	0	976	MD03G1103300
n/a_387	Chr03:8958587|8976746	0	0	7.53702	0	0	18159	n/a
MD03G1106100_1	Chr03:9098345|9098542	0	0	628.817	0	0	197	MD03G1106100
MD03G1108000_1	Chr03:9365588|9365794	0	0	907.453	0	0	206	MD03G1108000
MD03G1111700_1	Chr03:9736627|9736867	0	0	516.154	0	0	240	MD03G1111700
MD04G1079000_3	Chr04:10844710|10847789	0	0	158.408	0	0	576	MD04G1079000
MD04G1079000_4	Chr04:10845714|10849070	0	0	219.15	0	0	853	MD04G1079000
MD04G1086000_1	Chr04:12453839|12454087	0	0	367.916	0	0	248	MD04G1086000
MD04G1012200_1	Chr04:1361653|1362409	0	0	163.642	0	0	757	MD04G1012200
MD04G1001100_1	Chr04:143704|143874	0	0	1649.43	0	0	170	MD04G1001100
MD04G1013400_1	Chr04:1529509|1529698	0	0	655.434	0	0	189	MD04G1013400
MD04G1013400_2	Chr04:1533558|1534241	0	0	798.869	0	0	234	MD04G1013400
MD04G1001200_1	Chr04:161127|161295	0	0	737.363	0	0	168	MD04G1001200
MD04G1092300_1	Chr04:16414159|16414333	0	0	711.937	0	0	174	MD04G1092300
MD04G1098900_1	Chr04:18390619|18391440	0	0	616.948	0	0	606	MD04G1098900
MD04G1116800_1	Chr04:20216649|20216866	0	0	420.475	0	0	217	MD04G1116800
MD04G1125600_3	Chr04:21213180|21213558	0	0	241.384	0	0	378	MD04G1125600
MD04G1125600_6	Chr04:21213213|21213393	0	0	1032.31	0	0	180	MD04G1125600
MD04G1127400_1	Chr04:21335792|21336351	0	0	326.451	0	0	559	MD04G1127400
n/a_518	Chr04:21368712|21428227	0	0	2.08144	0	0	59515	n/a
MD04G1129900_1	Chr04:21645522|21647580	0	0	129.607	0	0	1056	MD04G1129900
n/a_519	Chr04:21863610|21863785	0	0	707.868	0	0	175	n/a
MD04G1143700_2	Chr04:23287850|23288019	0	0	1079.8	0	0	169	MD04G1143700
n/a_522	Chr04:24130130|24136019	0	0	31.7431	0	0	5889	n/a
MD04G1159300_1	Chr04:24750109|24750384	0	0	527.417	0	0	173	MD04G1159300
MD04G1169500_1	Chr04:26019401|26020357	0	0	145.061	0	0	629	MD04G1169500
MD04G1174800_1	Chr04:26610015|26610174	0	0	1175.69	0	0	159	MD04G1174800
MD04G1176200_1	Chr04:26706581|26706744	0	0	1146.84	0	0	163	MD04G1176200
MD04G1181400_1	Chr04:27213963|27214893	0	0	150.318	0	0	607	MD04G1181400
n/a_536	Chr04:28108533|28119970	0	0	7.97789	0	0	11437	n/a
MD04G1194100_6	Chr04:28356736|28357326	0	0	1474.73	0	0	420	MD04G1194100
MD04G1194200_1	Chr04:28361040|28361923	0	0	211.705	0	0	883	MD04G1194200
MD04G1201600_1	Chr04:28789919|28790094	0	0	707.868	0	0	175	MD04G1201600
MD04G1205300_1	Chr04:29156545|29157287	0	0	241.476	0	0	513	MD04G1205300
MD04G1215000_1	Chr04:29806474|29806969	0	0	429.043	0	0	319	MD04G1215000
n/a_544	Chr04:29898552|29899649	0	0	170.406	0	0	1097	n/a
MD04G1222200_1	Chr04:30315850|30316096	0	0	503.565	0	0	246	MD04G1222200
MD04G1227000_1	Chr04:30650943|30651985	0	0	118.884	0	0	1042	MD04G1227000
MD04G1027600_2	Chr04:3161488|3161909	0	0	216.73	0	0	421	MD04G1027600
n/a_553	Chr04:31926714|31976170	0	0	2.50479	0	0	49456	n/a
n/a_554	Chr04:31967656|31974703	0	0	25.8956	0	0	7047	n/a
MD04G1244400_1	Chr04:32055825|32056167	0	0	724.427	0	0	342	MD04G1244400
MD04G1247400_1	Chr04:32209622|32212696	0	0	65.5012	0	0	1393	MD04G1247400
MD04G1248400_1	Chr04:32281008|32282870	0	0	701.446	0	0	533	MD04G1248400
MD04G1037800_2	Chr04:4211208|4211868	0	0	138.038	0	0	661	MD04G1037800
MD04G1038000_1	Chr04:4228329|4228521	0	0	645.192	0	0	192	MD04G1038000
MD04G1039500_1	Chr04:4324583|4325769	0	0	511.888	0	0	242	MD04G1039500
MD04G1003000_2	Chr04:440313|440478	0	0	1474.73	0	0	84	MD04G1003000
MD04G1044600_1	Chr04:5203777|5204912	0	0	363.687	0	0	514	MD04G1044600
MD04G1045400_1	Chr04:5280945|5281133	0	0	994.337	0	0	188	MD04G1045400
MD04G1004800_1	Chr04:606704|609252	0	0	111.001	0	0	822	MD04G1004800
MD04G1051900_1	Chr04:6092277|6092864	0	0	261.442	0	0	349	MD04G1051900
n/a_500	Chr04:6185819|6186356	0	0	254.869	0	0	537	n/a
MD04G1055700_1	Chr04:6740545|6740742	0	0	460.824	0	0	198	MD04G1055700
MD04G1060500_1	Chr04:7909979|7910343	0	0	250.668	0	0	364	MD04G1060500
MD04G1062800_1	Chr04:8263505|8263695	0	0	1303.97	0	0	190	MD04G1062800
MD04G1069000_2	Chr04:9416600|9416962	0	0	252.053	0	0	362	MD04G1069000
MD04G1072900_1	Chr04:9964670|9972572	0	0	198.787	0	0	459	MD04G1072900
MD05G1066000_1	Chr05:12336357|12336540	0	0	498.596	0	0	183	MD05G1066000
Apple_newGene_32673_1	Chr05:1274223|1276456	0	0	40.8612	0	0	2233	Apple_newGene_32673
MD05G1006300_1	Chr05:1540163|1541064	0	0	361.157	0	0	343	MD05G1006300
MD05G1073000_1	Chr05:15423826|15424035	0	0	2192.51	0	0	113	MD05G1073000
MD05G1082000_2	Chr05:17177828|17178035	0	0	903.069	0	0	207	MD05G1082000
MD05G1082200_1	Chr05:17183067|17183762	0	0	269.154	0	0	339	MD05G1082200
MD05G1092000_1	Chr05:19505478|19505628	0	0	1246.24	0	0	150	MD05G1092000
n/a_565	Chr05:21334366|21370397	0	0	17.7265	0	0	36031	n/a
n/a_568	Chr05:21875473|21875632	0	0	779.1	0	0	159	n/a
MD05G1107800_3	Chr05:22123264|22128805	0	0	82.3123	0	0	2217	MD05G1107800
MD05G1107800_4	Chr05:22126134|22126854	0	0	228.68	0	0	399	MD05G1107800
MD05G1107800_5	Chr05:22140146|22140561	0	0	300.142	0	0	304	MD05G1107800
n/a_570	Chr05:22911295|22972237	0	0	41.922	0	0	60942	n/a
MD05G1117800_1	Chr05:23877015|23877189	0	0	711.937	0	0	174	MD05G1117800
MD05G1120900_1	Chr05:24363197|24363352	0	0	799.206	0	0	155	MD05G1120900
MD05G1122000_1	Chr05:24441221|24441425	0	0	670.906	0	0	204	MD05G1122000
MD05G1123200_1	Chr05:24577851|24578860	0	0	389.55	0	0	636	MD05G1123200
MD05G1124900_1	Chr05:24723188|24723364	0	0	1593.2	0	0	176	MD05G1124900
MD05G1128600_1	Chr05:25244960|25245146	0	0	1665.01	0	0	186	MD05G1128600
MD05G1153300_1	Chr05:28410358|28411654	0	0	112.207	0	0	1104	MD05G1153300
MD05G1163300_1	Chr05:29213249|29213512	0	0	706.523	0	0	263	MD05G1163300
n/a_595	Chr05:29750462|29836384	0	0	124.011	0	0	85922	n/a
MD05G1178700_1	Chr05:30525616|30526156	0	0	229.402	0	0	540	MD05G1178700
n/a_597	Chr05:30667686|30683122	0	0	14.7777	0	0	15436	n/a
MD05G1186600_1	Chr05:31471345|31471672	0	0	378.829	0	0	327	MD05G1186600
MD05G1223500_2	Chr05:35628953|35629188	0	0	1730.88	0	0	108	MD05G1223500
n/a_616	Chr05:36632600|36635872	0	0	69.7151	0	0	3272	n/a
n/a_617	Chr05:36632817|36636089	0	0	171.396	0	0	3272	n/a
MD05G1234200_1	Chr05:36653177|36653371	0	0	1175.81	0	0	194	MD05G1234200
n/a_619	Chr05:36775254|36775461	0	0	440.788	0	0	207	n/a
n/a_627	Chr05:37967770|37980923	0	0	24.618	0	0	13153	n/a
MD05G1249100_1	Chr05:38072990|38073249	0	0	721.758	0	0	259	MD05G1249100
MD05G1250200_1	Chr05:38258254|38258620	0	0	249.298	0	0	366	MD05G1250200
n/a_629	Chr05:38442946|38448002	0	0	49.002	0	0	5056	n/a
n/a_636	Chr05:40945894|40949253	0	0	55.3187	0	0	3359	n/a
MD05G1279300_1	Chr05:41357108|41357546	0	0	416.635	0	0	438	MD05G1279300
MD05G1026300_1	Chr05:4216086|4216268	0	0	1027.12	0	0	182	MD05G1026300
MD05G1027100_3	Chr05:4303188|4303364	0	0	1062.13	0	0	176	MD05G1027100
MD05G1303400_1	Chr05:43594135|43594426	0	0	638.541	0	0	291	MD05G1303400
n/a_641	Chr05:43817297|43827066	0	0	66.2913	0	0	9769	n/a
MD05G1310400_4	Chr05:44109466|44109638	0	0	530.483	0	0	172	MD05G1310400
MD05G1313100_2	Chr05:44382509|44382765	0	0	482.011	0	0	257	MD05G1313100
n/a_645	Chr05:44489630|44519006	0	0	48.4949	0	0	29376	n/a
n/a_650	Chr05:44522307|44524879	0	0	72.2455	0	0	2572	n/a
n/a_655	Chr05:44711022|44711198	0	0	518.427	0	0	176	n/a
MD05G1320300_1	Chr05:44772761|44772956	0	0	635.266	0	0	195	MD05G1320300
MD05G1322800_3	Chr05:45010768|45011132	0	0	396.709	0	0	230	MD05G1322800
MD05G1326700_1	Chr05:45286848|45287377	0	0	289.432	0	0	428	MD05G1326700
MD05G1335900_1	Chr05:45834956|45835303	0	0	1077.44	0	0	347	MD05G1335900
MD05G1336200_1	Chr05:45845420|45845607	0	0	1324.89	0	0	187	MD05G1336200
MD05G1341400_5	Chr05:46186681|46186908	0	0	401.952	0	0	227	MD05G1341400
MD05G1348200_1	Chr05:46673238|46673433	0	0	635.266	0	0	195	MD05G1348200
n/a_682	Chr05:46935144|46953730	0	0	83.4571	0	0	18586	n/a
n/a_684	Chr05:47008127|47008429	0	0	302.13	0	0	302	n/a
MD05G1354800_1	Chr05:47116175|47116381	0	0	442.928	0	0	206	MD05G1354800
MD05G1361800_1	Chr05:47715583|47715750	0	0	1092.73	0	0	167	MD05G1361800
MD05G1029400_2	Chr05:4817938|4818647	0	0	783.796	0	0	477	MD05G1029400
MD05G1030500_1	Chr05:4900039|4900592	0	0	730.216	0	0	384	MD05G1030500
MD05G1038100_2	Chr05:6057713|6057899	0	0	490.555	0	0	186	MD05G1038100
MD05G1040100_1	Chr05:6836263|6836584	0	0	577.067	0	0	322	MD05G1040100
MD05G1040100_2	Chr05:6842503|6842681	0	0	1043.91	0	0	178	MD05G1040100
MD05G1044900_1	Chr05:7727241|7729790	0	0	193.312	0	0	472	MD05G1044900
MD05G1001800_1	Chr05:871592|871777	0	0	1004.41	0	0	185	MD05G1001800
MD05G1000300_1	Chr05:89421|89706	0	0	320.151	0	0	285	MD05G1000300
MD06G1062300_1	Chr06:10479596|10480928	0	0	205.966	0	0	443	MD06G1062300
MD06G1062500_1	Chr06:10615350|10615704	0	0	528.066	0	0	354	MD06G1062500
n/a_694	Chr06:1534069|1537339	0	0	57.1668	0	0	3270	n/a
MD06G1012300_1	Chr06:1535159|1535587	0	0	632.025	0	0	196	MD06G1012300
MD06G1012600_1	Chr06:1610362|1610991	0	0	344.103	0	0	360	MD06G1012600
Apple_newGene_38766_1	Chr06:16991513|16992352	0	0	222.807	0	0	839	Apple_newGene_38766
MD06G1014600_1	Chr06:1851723|1851971	0	0	749.256	0	0	248	MD06G1014600
MD06G1015000_1	Chr06:1895383|1896799	0	0	139.658	0	0	887	MD06G1015000
MD06G1081300_1	Chr06:19934870|19935881	0	0	122.529	0	0	1011	MD06G1081300
MD06G1082900_1	Chr06:20390445|20390740	0	0	631.538	0	0	296	MD06G1082900
MD06G1085900_1	Chr06:21181445|21182706	0	0	380.769	0	0	488	MD06G1085900
MD06G1103000_1	Chr06:23985497|23986414	0	0	239.483	0	0	381	MD06G1103000
MD06G1105900_2	Chr06:24474415|24474554	0	0	656.426	0	0	139	MD06G1105900
MD06G1109300_1	Chr06:24886413|24886580	0	0	1092.73	0	0	167	MD06G1109300
MD06G1113000_1	Chr06:25121723|25121880	0	0	581.167	0	0	157	MD06G1113000
n/a_717	Chr06:25416952|25427929	0	0	45.1405	0	0	10977	n/a
MD06G1121800_1	Chr06:26316434|26316628	0	0	470.326	0	0	194	MD06G1121800
MD06G1121900_1	Chr06:26321953|26322165	0	0	881.771	0	0	212	MD06G1121900
n/a_719	Chr06:27643782|27643924	0	0	642.557	0	0	142	n/a
n/a_721	Chr06:27682024|27687389	0	0	8858.38	0	0	5365	n/a
MD06G1140800_1	Chr06:28453663|28453843	0	0	506.906	0	0	180	MD06G1140800
n/a_696	Chr06:2915842|2953152	0	0	4.89108	0	0	37310	n/a
MD06G1162100_1	Chr06:30286040|30286261	0	0	411.005	0	0	222	MD06G1162100
n/a_732	Chr06:30840988|30862330	0	0	8.55057	0	0	21342	n/a
n/a_739	Chr06:31892440|31920879	0	0	3.20838	0	0	28439	n/a
MD06G1185800_1	Chr06:32369239|32369489	0	0	747.741	0	0	250	MD06G1185800
MD06G1190400_1	Chr06:32683863|32684051	0	0	658.92	0	0	188	MD06G1190400
MD06G1200400_1	Chr06:33386462|33386617	0	0	1198.81	0	0	155	MD06G1200400
MD06G1201400_1	Chr06:33460162|33465099	0	0	193.415	0	0	1933	MD06G1201400
MD06G1202300_2	Chr06:33556718|33557229	0	0	242.421	0	0	511	MD06G1202300
MD06G1029300_1	Chr06:3501049|3501409	0	0	741.814	0	0	246	MD06G1029300
MD06G1234900_1	Chr06:36596427|36597194	0	0	319.27	0	0	388	MD06G1234900
MD06G1237000_2	Chr06:36823114|36823315	0	0	453.946	0	0	201	MD06G1237000
n/a_699	Chr06:3683303|3742011	0	0	686.173	0	0	58708	n/a
MD06G1032500_1	Chr06:3890395|3891342	0	0	580.22	0	0	427	MD06G1032500
MD06G1034900_1	Chr06:4325092|4325251	0	0	1558.2	0	0	159	MD06G1034900
MD06G1035700_1	Chr06:4634131|4634281	0	0	608.288	0	0	150	MD06G1035700
MD06G1037400_1	Chr06:4763946|4764218	0	0	335.453	0	0	272	MD06G1037400
n/a_703	Chr06:5049821|5050051	0	0	812.762	0	0	230	n/a
n/a_704	Chr06:5159274|5162227	0	0	30.8985	0	0	2953	n/a
MD06G1040700_1	Chr06:5207142|5207320	0	0	512.602	0	0	178	MD06G1040700
MD06G1005700_1	Chr06:609721|609879	0	0	784.031	0	0	158	MD06G1005700
MD06G1005900_2	Chr06:628221|628371	0	0	608.288	0	0	150	MD06G1005900
MD06G1046600_2	Chr06:6325734|6326015	0	0	616.303	0	0	201	MD06G1046600
MD06G1000600_1	Chr06:63964|64320	0	0	256.301	0	0	356	MD06G1000600
MD06G1006500_1	Chr06:684296|684765	0	0	375.385	0	0	330	MD06G1006500
MD07G1098600_1	Chr07:10878263|10878743	0	0	320.925	0	0	386	MD07G1098600
MD07G1100100_2	Chr07:11020958|11021967	0	0	297.781	0	0	416	MD07G1100100
MD07G1104800_1	Chr07:11859402|11859593	0	0	2446.8	0	0	191	MD07G1104800
MD07G1110200_1	Chr07:12659777|12660002	0	0	550.564	0	0	225	MD07G1110200
MD07G1111000_3	Chr07:12772507|12773441	0	0	263.568	0	0	470	MD07G1111000
MD07G1113200_1	Chr07:13347006|13348144	0	0	323.557	0	0	423	MD07G1113200
MD07G1115100_1	Chr07:13830952|13831168	0	0	573.504	0	0	216	MD07G1115100
MD07G1121000_1	Chr07:15138743|15139227	0	0	703.846	0	0	176	MD07G1121000
MD07G1130200_1	Chr07:18575164|18576105	0	0	159.795	0	0	571	MD07G1130200
MD07G1130300_1	Chr07:18619441|18619926	0	0	628.396	0	0	363	MD07G1130300
MD07G1136900_1	Chr07:19972329|19972624	0	0	629.883	0	0	295	MD07G1136900
MD07G1138200_1	Chr07:20135401|20137163	0	0	163.211	0	0	759	MD07G1138200
MD07G1026800_1	Chr07:2251575|2252297	0	0	202.745	0	0	611	MD07G1026800
MD07G1001800_2	Chr07:249728|249921	0	0	1277.08	0	0	194	MD07G1001800
MD07G1186700_1	Chr07:26774340|26774492	0	0	1200.57	0	0	152	MD07G1186700
MD07G1187800_1	Chr07:26837519|26837763	0	0	373.947	0	0	244	MD07G1187800
MD07G1188600_1	Chr07:26928177|26928573	0	0	311.41	0	0	293	MD07G1188600
MD07G1201500_1	Chr07:27960373|27962123	0	0	161.508	0	0	767	MD07G1201500
MD07G1223400_1	Chr07:30030174|30031582	0	0	502.717	0	0	363	MD07G1223400
MD07G1232800_1	Chr07:30678508|30678792	0	0	983.87	0	0	285	MD07G1232800
MD07G1234700_1	Chr07:30816544|30816742	0	0	944.118	0	0	198	MD07G1234700
MD07G1252900_2	Chr07:32052240|32052449	0	0	436.57	0	0	209	MD07G1252900
MD07G1255100_1	Chr07:32231192|32232479	0	0	746.247	0	0	249	MD07G1255100
MD07G1264600_1	Chr07:33336713|33338022	0	0	340.502	0	0	549	MD07G1264600
MD07G1267600_1	Chr07:33542033|33542534	0	0	408.835	0	0	303	MD07G1267600
MD07G1278200_1	Chr07:34311428|34311586	0	0	577.488	0	0	158	MD07G1278200
MD07G1279800_1	Chr07:34402254|34402677	0	0	402.198	0	0	308	MD07G1279800
MD07G1286900_1	Chr07:34860732|34860885	0	0	809.653	0	0	153	MD07G1286900
MD07G1289500_1	Chr07:35020191|35020358	0	0	741.778	0	0	167	MD07G1289500
MD07G1294300_1	Chr07:35534120|35534312	0	0	1460.43	0	0	192	MD07G1294300
MD07G1304800_1	Chr07:36204739|36204952	0	0	428.372	0	0	213	MD07G1304800
MD07G1043900_1	Chr07:3766920|3768814	0	0	176.828	0	0	516	MD07G1043900
MD07G1045900_1	Chr07:3911837|3912430	0	0	461.601	0	0	593	MD07G1045900
n/a_753	Chr07:407701|491851	0	0	14.4395	0	0	84150	n/a
n/a_782	Chr07:4699914|4700407	0	0	251.272	0	0	493	n/a
MD07G1057400_1	Chr07:5322173|5322605	0	0	211.211	0	0	432	MD07G1057400
MD07G1058400_1	Chr07:5424900|5425077	0	0	1056.13	0	0	177	MD07G1058400
MD07G1080500_1	Chr07:7800352|7803303	0	0	131.087	0	0	945	MD07G1080500
n/a_792	Chr07:9458616|9523811	0	0	1.39954	0	0	65195	n/a
MD07G1010400_1	Chr07:947641|948232	0	0	274.829	0	0	332	MD07G1010400
MD08G1114600_1	Chr08:10289394|10289583	0	0	989.076	0	0	189	MD08G1114600
MD08G1014300_1	Chr08:1076356|1076538	0	0	1027.12	0	0	182	MD08G1014300
MD08G1015000_1	Chr08:1147344|1147563	0	0	848.472	0	0	219	MD08G1015000
n/a_893	Chr08:12108963|12175813	0	0	6.4359	0	0	66850	n/a
MD08G1015600_1	Chr08:1224848|1225074	0	0	403.731	0	0	226	MD08G1015600
n/a_852	Chr08:1504067|1504332	0	0	860.784	0	0	265	n/a
MD08G1023500_1	Chr08:1691470|1692976	0	0	1354.6	0	0	207	MD08G1023500
n/a_897	Chr08:17293688|17296317	0	0	106.658	0	0	2629	n/a
MD08G1024100_1	Chr08:1734583|1735803	0	0	101.538	0	0	1220	MD08G1024100
n/a_853	Chr08:1833296|1847654	0	0	43.1387	0	0	14358	n/a
MD08G1162900_2	Chr08:19187637|19187796	0	0	573.856	0	0	159	MD08G1162900
MD08G1168300_1	Chr08:20011375|20013218	0	0	130.347	0	0	700	MD08G1168300
MD08G1002100_1	Chr08:211402|211589	0	0	993.665	0	0	187	MD08G1002100
MD08G1176200_1	Chr08:21388188|21388811	0	0	198.839	0	0	623	MD08G1176200
MD08G1178000_1	Chr08:21799723|21799907	0	0	673.244	0	0	184	MD08G1178000
MD08G1178000_2	Chr08:21807215|21807403	0	0	658.92	0	0	188	MD08G1178000
n/a_901	Chr08:24066412|24066573	0	0	769.422	0	0	161	n/a
MD08G1194100_2	Chr08:24962911|24963145	0	0	790.704	0	0	235	MD08G1194100
MD08G1194100_3	Chr08:24963437|24964939	0	0	235.508	0	0	526	MD08G1194100
MD08G1194600_1	Chr08:25007269|25007428	0	0	779.1	0	0	159	MD08G1194600
MD08G1197800_1	Chr08:25642555|25643472	0	0	250.763	0	0	494	MD08G1197800
MD08G1197800_2	Chr08:25642805|25643466	0	0	331.222	0	0	374	MD08G1197800
MD08G1203800_1	Chr08:26356932|26357667	0	0	225.849	0	0	404	MD08G1203800
MD08G1203800_2	Chr08:26356932|26363729	0	0	38.8931	0	0	2346	MD08G1203800
MD08G1203800_3	Chr08:26357321|26357479	0	0	573.856	0	0	159	MD08G1203800
n/a_920	Chr08:26544793|26643692	0	0	1.87884	0	0	98899	n/a
n/a_925	Chr08:27695024|27714255	0	0	17.6276	0	0	19231	n/a
MD08G1002600_2	Chr08:277689|278322	0	0	596.36	0	0	306	MD08G1002600
MD08G1220100_1	Chr08:28294099|28294260	0	0	769.422	0	0	161	MD08G1220100
n/a_939	Chr08:29921152|29965406	0	0	4.22415	0	0	44254	n/a
n/a_864	Chr08:3049365|3061205	0	0	685.865	0	0	11840	n/a
n/a_946	Chr08:30494942|30518352	0	0	7.98528	0	0	23410	n/a
MD08G1241600_1	Chr08:30713521|30714958	0	0	149.09	0	0	612	MD08G1241600
MD08G1245400_1	Chr08:31009629|31010328	0	0	327.624	0	0	557	MD08G1245400
MD08G1247700_3	Chr08:31136970|31137403	0	0	447.209	0	0	277	MD08G1247700
n/a_875	Chr08:3404281|3445399	0	0	3.32858	0	0	41118	n/a
n/a_876	Chr08:3416554|3459483	0	0	4.32844	0	0	42929	n/a
MD08G1003700_1	Chr08:373114|373286	0	0	1080.55	0	0	173	MD08G1003700
n/a_877	Chr08:3960946|3970627	0	0	12.7959	0	0	9681	n/a
MD08G1057600_1	Chr08:4626950|4627236	0	0	638.064	0	0	286	MD08G1057600
MD08G1060500_1	Chr08:4797219|4798367	0	0	232.415	0	0	533	MD08G1060500
MD08G1062700_1	Chr08:4947264|4947595	0	0	373.947	0	0	244	MD08G1062700
MD08G1006800_1	Chr08:542780|543381	0	0	275.382	0	0	497	MD08G1006800
MD08G1070000_1	Chr08:5545528|5547377	0	0	117.754	0	0	1052	MD08G1070000
n/a_888	Chr08:6914339|6941861	0	0	13.5844	0	0	27522	n/a
MD08G1087700_1	Chr08:7253677|7253857	0	0	1032.31	0	0	180	MD08G1087700
MD08G1010800_1	Chr08:828018|828414	0	0	616.508	0	0	222	MD08G1010800
MD08G1010800_2	Chr08:828282|828876	0	0	312.821	0	0	594	MD08G1010800
MD08G1108000_1	Chr08:9513053|9514117	0	0	291.512	0	0	313	MD08G1108000
n/a_1023	Chr09:10150054|10168128	0	0	5.04831	0	0	18074	n/a
MD09G1137000_1	Chr09:10616708|10621412	0	0	44.544	0	0	2781	MD09G1137000
MD09G1018500_1	Chr09:1148527|1148902	0	0	498.494	0	0	375	MD09G1018500
MD09G1149500_1	Chr09:11743385|11743560	0	0	703.846	0	0	176	MD09G1149500
MD09G1019800_1	Chr09:1198090|1199010	0	0	134.649	0	0	920	MD09G1019800
n/a_1036	Chr09:12263881|12292992	0	0	170.82	0	0	29111	n/a
MD09G1155300_1	Chr09:12357092|12357306	0	0	426.37	0	0	214	MD09G1155300
MD09G1159400_1	Chr09:12745268|12745498	0	0	538.595	0	0	230	MD09G1159400
n/a_952	Chr09:1275339|1282761	0	0	12.2936	0	0	7422	n/a
MD09G1162000_1	Chr09:13094304|13095332	0	0	126.727	0	0	720	MD09G1162000
MD09G1023400_1	Chr09:1404689|1405516	0	0	339.061	0	0	827	MD09G1023400
MD09G1178100_1	Chr09:15238664|15240008	0	0	211.394	0	0	586	MD09G1178100
MD09G1178800_1	Chr09:15297978|15298295	0	0	390.779	0	0	317	MD09G1178800
MD09G1185800_1	Chr09:16103437|16103738	0	0	823.103	0	0	301	MD09G1185800
MD09G1186900_1	Chr09:16273689|16273924	0	0	527.136	0	0	235	MD09G1186900
MD09G1192900_2	Chr09:17208637|17209209	0	0	424.236	0	0	292	MD09G1192900
MD09G1194500_1	Chr09:17485858|17487281	0	0	138.101	0	0	897	MD09G1194500
n/a_960	Chr09:1912510|1924914	0	0	82.8881	0	0	12404	n/a
n/a_964	Chr09:1915196|1927829	0	0	19.6116	0	0	12633	n/a
n/a_965	Chr09:1917252|1929272	0	0	551.366	0	0	12020	n/a
MD09G1032400_1	Chr09:1970904|1971076	0	0	1086.83	0	0	172	MD09G1032400
n/a_968	Chr09:2268007|2271190	0	0	28.6658	0	0	3183	n/a
MD09G1222300_1	Chr09:25905775|25906742	0	0	128.104	0	0	967	MD09G1222300
MD09G1225000_1	Chr09:27693053|27693988	0	0	301.133	0	0	303	MD09G1225000
n/a_976	Chr09:2799395|2826754	0	0	9.53038	0	0	27359	n/a
MD09G1234200_1	Chr09:29444102|29448801	0	0	163.128	0	0	839	MD09G1234200
MD09G1234500_1	Chr09:29480389|29480564	0	0	1068.2	0	0	175	MD09G1234500
n/a_1060	Chr09:29564379|29566822	0	0	76.5188	0	0	2443	n/a
MD09G1243900_1	Chr09:31158396|31158911	0	0	263.709	0	0	346	MD09G1243900
n/a_1062	Chr09:32764903|32800901	0	0	3.44122	0	0	35998	n/a
n/a_1064	Chr09:33347179|33350984	0	0	97.6691	0	0	3805	n/a
MD09G1053900_1	Chr09:3576233|3576785	0	0	336.622	0	0	552	MD09G1053900
n/a_1081	Chr09:35884626|35887519	0	0	78.8482	0	0	2893	n/a
MD09G1054400_1	Chr09:3616939|3617408	0	0	619.385	0	0	300	MD09G1054400
MD09G1286700_1	Chr09:36523408|36523827	0	0	296.244	0	0	308	MD09G1286700
MD09G1287000_1	Chr09:36587373|36590191	0	0	120.533	0	0	757	MD09G1287000
n/a_1083	Chr09:37057630|37068915	0	0	8.08535	0	0	11285	n/a
MD09G1290500_1	Chr09:37246860|37247463	0	0	506.309	0	0	367	MD09G1290500
n/a_984	Chr09:3880659|3885986	0	0	34.2569	0	0	5327	n/a
MD09G1072200_1	Chr09:4967155|4968614	0	0	577.488	0	0	158	MD09G1072200
MD09G1075900_2	Chr09:5356316|5359278	0	0	370.903	0	0	1008	MD09G1075900
MD09G1079800_1	Chr09:5602307|5602593	0	0	478.548	0	0	286	MD09G1079800
MD09G1080000_1	Chr09:5611391|5612163	0	0	118.191	0	0	772	MD09G1080000
MD09G1085700_1	Chr09:6109359|6109553	0	0	470.326	0	0	194	MD09G1085700
n/a_999	Chr09:6612854|6613059	0	0	604.278	0	0	205	n/a
n/a_1000	Chr09:6856544|6918750	0	0	4.40037	0	0	62206	n/a
MD09G1109300_1	Chr09:8091054|8091215	0	0	566.728	0	0	161	MD09G1109300
MD09G1110700_1	Chr09:8228220|8228416	0	0	632.025	0	0	196	MD09G1110700
MD09G1000400_1	Chr09:86774|87404	0	0	406.154	0	0	305	MD09G1000400
MD09G1115400_1	Chr09:8868179|8868489	0	0	1086.23	0	0	126	MD09G1115400
n/a_1013	Chr09:8883428|8899468	0	0	23.169	0	0	16040	n/a
n/a_1014	Chr09:8942449|8957179	0	0	192.026	0	0	14730	n/a
MD09G1117800_1	Chr09:9048405|9048631	0	0	633.633	0	0	144	MD09G1117800
n/a_1018	Chr09:9333615|9353563	0	0	18.6861	0	0	19948	n/a
MD09G1122500_1	Chr09:9443375|9443559	0	0	495.887	0	0	184	MD09G1122500
MD10G1081900_1	Chr10:12047047|12047750	0	0	381.77	0	0	239	MD10G1081900
MD10G1081900_3	Chr10:12047047|12048525	0	0	371.631	0	0	500	MD10G1081900
MD10G1082200_1	Chr10:12103988|12105013	0	0	548.198	0	0	341	MD10G1082200
MD10G1012500_1	Chr10:1716643|1717294	0	0	285.431	0	0	651	MD10G1012500
MD10G1114400_1	Chr10:18748868|18749039	0	0	533.586	0	0	171	MD10G1114400
MD10G1120800_1	Chr10:19760739|19760937	0	0	944.118	0	0	198	MD10G1120800
MD10G1127000_1	Chr10:20709843|20709994	0	0	1640.75	0	0	151	MD10G1127000
MD10G1148300_1	Chr10:23589158|23589495	0	0	367.587	0	0	337	MD10G1148300
MD10G1150700_1	Chr10:23741360|23741549	0	0	482.768	0	0	189	MD10G1150700
n/a_1137	Chr10:24006422|24007244	0	0	227.415	0	0	822	n/a
MD10G1169600_1	Chr10:26158386|26158545	0	0	573.856	0	0	159	MD10G1169600
n/a_1142	Chr10:26678211|26707309	0	0	38.546	0	0	29098	n/a
MD10G1181500_1	Chr10:27455931|27456483	0	0	360.107	0	0	344	MD10G1181500
n/a_1144	Chr10:27461608|27509417	0	0	58.2993	0	0	47809	n/a
n/a_1099	Chr10:2854974|2856157	0	0	104.714	0	0	1183	n/a
Apple_newGene_56107_1	Chr10:29028502|29028930	0	0	436.765	0	0	428	Apple_newGene_56107
MD10G1197900_1	Chr10:29599759|29600919	0	0	347.969	0	0	356	MD10G1197900
MD10G1198300_1	Chr10:29631059|29631218	0	0	1175.69	0	0	159	MD10G1198300
MD10G1024000_1	Chr10:3008165|3008383	0	0	418.547	0	0	218	MD10G1024000
MD10G1204200_1	Chr10:30330601|30331755	0	0	79.0669	0	0	1154	MD10G1204200
MD10G1205000_1	Chr10:30408664|30409531	0	0	186.211	0	0	490	MD10G1205000
MD10G1206600_2	Chr10:30555188|30555419	0	0	394.992	0	0	231	MD10G1206600
MD10G1219100_1	Chr10:31670671|31670884	0	0	428.372	0	0	213	MD10G1219100
MD10G1231700_1	Chr10:32824914|32827692	0	0	155.853	0	0	1673	MD10G1231700
MD10G1235100_1	Chr10:33113253|33113605	0	0	346.932	0	0	263	MD10G1235100
MD10G1253800_1	Chr10:34631761|34631926	0	0	750.769	0	0	165	MD10G1253800
n/a_1160	Chr10:34718899|34755597	0	0	35.6572	0	0	36698	n/a
MD10G1264000_1	Chr10:35779299|35779749	0	0	561.367	0	0	333	MD10G1264000
MD10G1264300_1	Chr10:35791602|35792129	0	0	720.215	0	0	172	MD10G1264300
n/a_1163	Chr10:35873535|35873695	0	0	570.27	0	0	160	n/a
n/a_1164	Chr10:35874004|35874181	0	0	699.87	0	0	177	n/a
MD10G1269500_1	Chr10:36205025|36205320	0	0	1086.83	0	0	172	MD10G1269500
MD10G1277900_2	Chr10:36868040|36868313	0	0	334.224	0	0	273	MD10G1277900
MD10G1283000_1	Chr10:37342345|37342575	0	0	1077.19	0	0	230	MD10G1283000
MD10G1289000_1	Chr10:37815180|37817014	0	0	363.276	0	0	341	MD10G1289000
MD10G1289000_2	Chr10:37815180|37817854	0	0	166.278	0	0	745	MD10G1289000
MD10G1289000_3	Chr10:37815180|37818039	0	0	107.98	0	0	845	MD10G1289000
MD10G1295300_5	Chr10:38292160|38292324	0	0	556.361	0	0	164	MD10G1295300
MD10G1029800_1	Chr10:3909157|3909366	0	0	592.713	0	0	209	MD10G1029800
MD10G1311700_1	Chr10:39645332|39645628	0	0	308.254	0	0	296	MD10G1311700
MD10G1314900_12	Chr10:39895949|39896145	0	0	465.526	0	0	196	MD10G1314900
n/a_1178	Chr10:40033831|40071355	0	0	4.86319	0	0	37524	n/a
MD10G1319300_1	Chr10:40157104|40159087	0	0	119.572	0	0	1036	MD10G1319300
MD10G1332000_2	Chr10:40959411|40960036	0	0	503.565	0	0	369	MD10G1332000
MD10G1332400_5	Chr10:40983349|40983528	0	0	509.738	0	0	179	MD10G1332400
n/a_1183	Chr10:41007298|41025951	0	0	4.89161	0	0	18653	n/a
MD10G1342600_1	Chr10:41745859|41746039	0	0	760.36	0	0	180	MD10G1342600
n/a_1101	Chr10:4440828|4491444	0	0	3.69321	0	0	50616	n/a
n/a_1104	Chr10:4753663|4764131	0	0	13.0746	0	0	10468	n/a
MD10G1039200_1	Chr10:5159524|5159680	0	0	794.083	0	0	156	MD10G1039200
MD10G1045800_1	Chr10:6130883|6132144	0	0	718.127	0	0	345	MD10G1045800
MD10G1052500_2	Chr10:6967127|6967678	0	0	289.661	0	0	315	MD10G1052500
MD10G1004400_1	Chr10:727196|727452	0	0	730.216	0	0	256	MD10G1004400
MD10G1056900_1	Chr10:7753846|7754063	0	0	857.502	0	0	218	MD10G1056900
MD10G1005500_1	Chr10:847070|847226	0	0	1191.12	0	0	156	MD10G1005500
MD10G1062500_1	Chr10:8508598|8509374	0	0	399.088	0	0	776	MD10G1062500
MD10G1065800_1	Chr10:9001472|9001630	0	0	1443.72	0	0	158	MD10G1065800
MD10G1066100_1	Chr10:9044540|9045181	0	0	512.602	0	0	178	MD10G1066100
MD10G1070300_1	Chr10:9769827|9770002	0	0	707.868	0	0	175	MD10G1070300
MD11G1119700_2	Chr11:10900926|10903067	0	0	96.0454	0	0	950	MD11G1119700
MD11G1119700_3	Chr11:10902489|10902639	0	0	1246.24	0	0	150	MD11G1119700
n/a_1268	Chr11:11279613|11296222	0	0	16.4808	0	0	16609	n/a
n/a_1270	Chr11:11356064|11362838	0	0	256.02	0	0	6774	n/a
MD11G1129800_1	Chr11:11786862|11787265	0	0	226.41	0	0	403	MD11G1129800
MD11G1145200_2	Chr11:13506444|13506626	0	0	752.004	0	0	182	MD11G1145200
MD11G1149200_2	Chr11:14125421|14126030	0	0	251.359	0	0	363	MD11G1149200
MD11G1154700_1	Chr11:14854691|14854912	0	0	560.529	0	0	221	MD11G1154700
MD11G1170800_1	Chr11:18468283|18477604	0	0	979.264	0	0	253	MD11G1170800
MD11G1182700_2	Chr11:22533822|22536198	0	0	1036.71	0	0	371	MD11G1182700
MD11G1182700_4	Chr11:22536004|22536198	0	0	1445.38	0	0	194	MD11G1182700
n/a_1192	Chr11:227838|228749	0	0	205.198	0	0	911	n/a
MD11G1184900_2	Chr11:24753776|24754112	0	0	271.557	0	0	336	MD11G1184900
MD11G1028600_1	Chr11:2509805|2509955	0	0	608.288	0	0	150	MD11G1028600
MD11G1185700_1	Chr11:25185809|25185986	0	0	699.87	0	0	177	MD11G1185700
MD11G1188500_1	Chr11:26586424|26586605	0	0	1002.67	0	0	91	MD11G1188500
MD11G1190400_1	Chr11:26875552|26877336	0	0	814.533	0	0	459	MD11G1190400
MD11G1191900_1	Chr11:27245885|27246038	0	0	596.36	0	0	153	MD11G1191900
MD11G1003400_1	Chr11:273831|274056	0	0	550.564	0	0	225	MD11G1003400
MD11G1194500_1	Chr11:27887639|27888724	0	0	277.352	0	0	674	MD11G1194500
MD11G1196000_1	Chr11:28062288|28062885	0	0	308.152	0	0	402	MD11G1196000
MD11G1200600_1	Chr11:28973751|28973905	0	0	804.396	0	0	154	MD11G1200600
MD11G1209500_1	Chr11:30648309|30648670	0	0	517.826	0	0	361	MD11G1209500
MD11G1213900_1	Chr11:31255935|31256729	0	0	323.557	0	0	282	MD11G1213900
MD11G1214500_2	Chr11:31316316|31316587	0	0	1142.78	0	0	271	MD11G1214500
n/a_1281	Chr11:31827839|31834460	0	0	13.7809	0	0	6621	n/a
MD11G1220800_1	Chr11:32390355|32391453	0	0	143.69	0	0	635	MD11G1220800
MD11G1227900_1	Chr11:33177791|33178078	0	0	431.627	0	0	287	MD11G1227900
MD11G1228000_1	Chr11:33180053|33183347	0	0	75.3051	0	0	1645	MD11G1228000
MD11G1236100_1	Chr11:34338653|34339875	0	0	74.6671	0	0	1222	MD11G1236100
MD11G1042000_2	Chr11:3610442|3610849	0	0	286.029	0	0	319	MD11G1042000
MD11G1251000_4	Chr11:36311916|36318654	0	0	127.577	0	0	971	MD11G1251000
Apple_newGene_61083_1	Chr11:36407571|36407858	0	0	317.92	0	0	287	Apple_newGene_61083
MD11G1257300_1	Chr11:36953979|36954162	0	0	2280.15	0	0	183	MD11G1257300
MD11G1258100_2	Chr11:37071518|37072117	0	0	297.067	0	0	417	MD11G1258100
n/a_1292	Chr11:38123916|38128539	0	0	39.4736	0	0	4623	n/a
MD11G1284800_1	Chr11:40333972|40334714	0	0	477.713	0	0	382	MD11G1284800
MD11G1046500_1	Chr11:4040199|4040597	0	0	311.249	0	0	398	MD11G1046500
MD11G1286000_1	Chr11:40538564|40539110	0	0	401.952	0	0	227	MD11G1286000
MD11G1289200_1	Chr11:40876925|40877127	0	0	925.423	0	0	202	MD11G1289200
n/a_1310	Chr11:41518249|41518483	0	0	1987.67	0	0	234	n/a
n/a_1311	Chr11:41701805|41701977	0	0	720.215	0	0	172	n/a
MD11G1307100_2	Chr11:42126669|42126924	0	0	733.08	0	0	255	MD11G1307100
MD11G1308900_1	Chr11:42271327|42272690	0	0	241.711	0	0	1025	MD11G1308900
n/a_1325	Chr11:42586412|42586587	0	0	521.389	0	0	175	n/a
n/a_1327	Chr11:42647372|42647636	0	0	1062.13	0	0	264	n/a
n/a_1233	Chr11:5718786|5727859	0	0	20.6035	0	0	9073	n/a
MD11G1069900_2	Chr11:5978946|5979099	0	0	1619.31	0	0	153	MD11G1069900
n/a_1238	Chr11:6025076|6077914	0	0	2.59027	0	0	52838	n/a
n/a_1241	Chr11:6667404|6674103	0	0	27.7378	0	0	6699	n/a
MD11G1082400_1	Chr11:7002651|7002915	0	0	800.378	0	0	171	MD11G1082400
MD11G1093000_1	Chr11:7717741|7718226	0	0	282.195	0	0	485	MD11G1093000
n/a_1334	Chr12:1007291|1009241	0	0	46.7914	0	0	1950	n/a
MD12G1096400_1	Chr12:13482593|13484717	0	0	111.681	0	0	817	MD12G1096400
MD12G1013700_1	Chr12:1433531|1433714	0	0	676.923	0	0	183	MD12G1013700
n/a_1338	Chr12:1639689|1639951	0	0	348.256	0	0	262	n/a
MD12G1107400_1	Chr12:16956811|16957255	0	0	279.002	0	0	444	MD12G1107400
MD12G1115000_1	Chr12:18358584|18359091	0	0	359.934	0	0	507	MD12G1115000
MD12G1120600_6	Chr12:19330141|19330369	0	0	814.98	0	0	228	MD12G1120600
MD12G1120700_2	Chr12:19363993|19364221	0	0	543.32	0	0	228	MD12G1120700
MD12G1020000_1	Chr12:1971687|1974579	0	0	327.717	0	0	567	MD12G1020000
n/a_1366	Chr12:20004948|20013706	0	0	35.489	0	0	8758	n/a
MD12G1125800_1	Chr12:20110422|20111028	0	0	485.158	0	0	383	MD12G1125800
MD12G1126000_1	Chr12:20144729|20144897	0	0	737.363	0	0	168	MD12G1126000
MD12G1141500_4	Chr12:22000041|22000273	0	0	533.952	0	0	232	MD12G1141500
n/a_1379	Chr12:23805619|23806006	0	0	320.095	0	0	387	n/a
n/a_1380	Chr12:23820547|23867159	0	0	2.65762	0	0	46612	n/a
MD12G1159800_1	Chr12:23965472|23965665	0	0	968.577	0	0	193	MD12G1159800
MD12G1184900_1	Chr12:26585230|26585791	0	0	724.556	0	0	258	MD12G1184900
MD12G1186100_1	Chr12:26762589|26762795	0	0	1361.18	0	0	206	MD12G1186100
MD12G1187100_1	Chr12:26930930|26931080	0	0	912.431	0	0	150	MD12G1187100
MD12G1190500_1	Chr12:27323513|27323691	0	0	695.938	0	0	178	MD12G1190500
MD12G1196900_1	Chr12:27798124|27798553	0	0	407.335	0	0	224	MD12G1196900
MD12G1198800_2	Chr12:27979581|27979737	0	0	794.083	0	0	156	MD12G1198800
MD12G1198900_1	Chr12:27981937|27982294	0	0	1486.52	0	0	250	MD12G1198900
MD12G1201700_1	Chr12:28220162|28220507	0	0	359.064	0	0	345	MD12G1201700
n/a_1397	Chr12:28480657|28483687	0	0	30.1133	0	0	3030	n/a
MD12G1209600_1	Chr12:28858714|28859432	0	0	459.939	0	0	404	MD12G1209600
MD12G1209700_1	Chr12:28865021|28865201	0	0	688.205	0	0	180	MD12G1209700
MD12G1213200_1	Chr12:29164692|29164921	0	0	540.947	0	0	229	MD12G1213200
n/a_1404	Chr12:29389493|29395229	0	0	32.5898	0	0	5736	n/a
n/a_1411	Chr12:30089668|30137620	0	0	10.6043	0	0	47952	n/a
MD12G1227700_2	Chr12:30326930|30329211	0	0	979.264	0	0	253	MD12G1227700
n/a_1417	Chr12:30883943|30891256	0	0	25.5621	0	0	7313	n/a
MD12G1252000_1	Chr12:32129552|32130146	0	0	626.67	0	0	364	MD12G1252000
n/a_1433	Chr12:32156675|32164109	0	0	2399.55	0	0	7434	n/a
MD12G1260900_1	Chr12:32718112|32718330	0	0	837.093	0	0	218	MD12G1260900
MD12G1263400_1	Chr12:32974880|32975678	0	0	291.512	0	0	313	MD12G1263400
MD12G1263400_2	Chr12:32978189|32980268	0	0	209.273	0	0	436	MD12G1263400
MD12G1032200_1	Chr12:3539258|3540305	0	0	500.85	0	0	371	MD12G1032200
MD12G1036800_1	Chr12:3948534|3951738	0	0	223.202	0	0	555	MD12G1036800
MD12G1003400_1	Chr12:513512|513728	0	0	422.422	0	0	216	MD12G1003400
MD12G1003400_2	Chr12:518675|519136	0	0	262.949	0	0	347	MD12G1003400
MD12G1046400_1	Chr12:5209503|5209697	0	0	470.326	0	0	194	MD12G1046400
MD12G1074400_1	Chr12:8950832|8951877	0	0	302.975	0	0	617	MD12G1074400
n/a_1351	Chr12:9279837|9323112	0	0	2.10845	0	0	43275	n/a
MD13G1140600_1	Chr13:10845437|10846062	0	0	379.991	0	0	326	MD13G1140600
MD13G1148300_1	Chr13:11630481|11631035	0	0	741.807	0	0	378	MD13G1148300
MD13G1148300_2	Chr13:11632363|11632591	0	0	819.892	0	0	228	MD13G1148300
MD13G1154800_1	Chr13:12069446|12070995	0	0	189.301	0	0	723	MD13G1154800
MD13G1162600_1	Chr13:12815956|12818027	0	0	239.358	0	0	953	MD13G1162600
MD13G1168100_1	Chr13:13608686|13609151	0	0	355.032	0	0	257	MD13G1168100
MD13G1170300_1	Chr13:13831570|13831971	0	0	670.814	0	0	277	MD13G1170300
MD13G1170300_2	Chr13:13831570|13832485	0	0	197.069	0	0	463	MD13G1170300
MD13G1172500_2	Chr13:14152261|14152610	0	0	377.038	0	0	242	MD13G1172500
MD13G1173900_1	Chr13:14319010|14319736	0	0	310.009	0	0	603	MD13G1173900
MD13G1174800_1	Chr13:14441561|14441923	0	0	855.504	0	0	362	MD13G1174800
MD13G1176900_1	Chr13:14669272|14672149	0	0	89.4541	0	0	1020	MD13G1176900
MD13G1178300_1	Chr13:14860318|14861543	0	0	345.75	0	0	811	MD13G1178300
MD13G1186100_1	Chr13:15847751|15848695	0	0	325.136	0	0	381	MD13G1186100
MD13G1195300_1	Chr13:16928915|16929081	0	0	746.247	0	0	166	MD13G1195300
MD13G1197600_2	Chr13:17319847|17320184	0	0	551.381	0	0	337	MD13G1197600
n/a_1452	Chr13:1922092|1928862	0	0	18.2979	0	0	6770	n/a
MD13G1027300_1	Chr13:1969199|1969475	0	0	447.209	0	0	277	MD13G1027300
MD13G1221800_1	Chr13:21465654|21467274	0	0	5192.65	0	0	180	MD13G1221800
MD13G1225800_1	Chr13:22066390|22066554	0	0	556.361	0	0	164	MD13G1225800
n/a_1483	Chr13:22069606|22069817	0	0	1771.9	0	0	211	n/a
MD13G1228800_1	Chr13:22452096|22452295	0	0	2818.12	0	0	199	MD13G1228800
MD13G1248200_1	Chr13:26369142|26369516	0	0	496.833	0	0	374	MD13G1248200
Apple_newGene_3913_1	Chr13:26514500|26518085	0	0	51.8314	0	0	3585	Apple_newGene_3913
MD13G1042400_1	Chr13:2934226|2934424	0	0	460.824	0	0	198	MD13G1042400
MD13G1262500_1	Chr13:33326329|33326494	0	0	552.989	0	0	165	MD13G1262500
MD13G1262800_1	Chr13:33400092|33400471	0	0	716.227	0	0	261	MD13G1262800
MD13G1264800_1	Chr13:34219193|34219583	0	0	317.633	0	0	390	MD13G1264800
MD13G1264800_2	Chr13:34219193|34219585	0	0	316.013	0	0	392	MD13G1264800
MD13G1267300_1	Chr13:34852174|34853330	0	0	196.645	0	0	464	MD13G1267300
n/a_1489	Chr13:36434781|36439934	0	0	36.277	0	0	5153	n/a
MD13G1053600_1	Chr13:3780663|3781643	0	0	893.343	0	0	208	MD13G1053600
MD13G1059000_4	Chr13:4113623|4113779	0	0	1588.17	0	0	156	MD13G1059000
MD13G1285600_1	Chr13:44057819|44059044	0	0	122.146	0	0	747	MD13G1285600
MD13G1078100_1	Chr13:5501295|5501630	0	0	272.368	0	0	335	MD13G1078100
MD13G1085000_1	Chr13:5971440|5974692	0	0	94.6107	0	0	1964	MD13G1085000
MD13G1085000_2	Chr13:5972824|5973190	0	0	249.298	0	0	366	MD13G1085000
MD13G1091800_1	Chr13:6470519|6470673	0	0	592.488	0	0	154	MD13G1091800
MD13G1094100_1	Chr13:6626589|6626756	0	0	1112.67	0	0	167	MD13G1094100
MD13G1094700_1	Chr13:6664849|6665014	0	0	552.989	0	0	165	MD13G1094700
MD13G1105000_2	Chr13:7519970|7520210	0	0	1168.35	0	0	240	MD13G1105000
MD13G1109900_1	Chr13:7992924|7993083	0	0	2295.43	0	0	159	MD13G1109900
MD13G1013100_1	Chr13:816576|817601	0	0	143.239	0	0	637	MD13G1013100
MD13G1129300_1	Chr13:9772474|9772941	0	0	942.03	0	0	263	MD13G1129300
MD14G1087500_2	Chr14:10905167|10909358	0	0	192.32	0	0	1458	MD14G1087500
MD14G1090600_1	Chr14:11548491|11558332	0	0	248.281	0	0	735	MD14G1090600
n/a_1499	Chr14:1295940|1296391	0	0	303.469	0	0	451	n/a
MD14G1093100_1	Chr14:13887008|13887866	0	0	563.077	0	0	440	MD14G1093100
MD14G1098200_1	Chr14:14988662|14988938	0	0	673.244	0	0	276	MD14G1098200
MD14G1098200_2	Chr14:14992048|14993318	0	0	337.938	0	0	270	MD14G1098200
MD14G1107600_2	Chr14:16832295|16833950	0	0	224.737	0	0	609	MD14G1107600
MD14G1116300_1	Chr14:18867797|18868106	0	0	604.969	0	0	309	MD14G1116300
MD14G1020100_1	Chr14:1892386|1893658	0	0	885.95	0	0	422	MD14G1020100
MD14G1119500_1	Chr14:19365529|19367172	0	0	128.511	0	0	710	MD14G1119500
MD14G1123900_1	Chr14:19942475|19942809	0	0	273.183	0	0	334	MD14G1123900
MD14G1125200_1	Chr14:20032314|20034245	0	0	129.976	0	0	1053	MD14G1125200
MD14G1127600_1	Chr14:20329914|20330093	0	0	509.738	0	0	179	MD14G1127600
MD14G1128000_1	Chr14:20439786|20439941	0	0	882.998	0	0	155	MD14G1128000
MD14G1131500_1	Chr14:20882926|20883143	0	0	861.453	0	0	217	MD14G1131500
n/a_1528	Chr14:20966996|21024284	0	0	21.21	0	0	57288	n/a
MD14G1137500_1	Chr14:22468867|22469035	0	0	737.363	0	0	168	MD14G1137500
MD14G1147600_1	Chr14:24036325|24036948	0	0	146.458	0	0	623	MD14G1147600
MD14G1148700_1	Chr14:24150099|24150331	0	0	391.601	0	0	233	MD14G1148700
MD14G1154200_2	Chr14:24869608|24870327	0	0	353.261	0	0	526	MD14G1154200
MD14G1158300_1	Chr14:25245315|25245483	0	0	1112.71	0	0	168	MD14G1158300
MD14G1168200_1	Chr14:26127204|26127615	0	0	298.18	0	0	306	MD14G1168200
MD14G1177400_1	Chr14:27070090|27070282	0	0	645.192	0	0	192	MD14G1177400
MD14G1177400_2	Chr14:27070090|27070863	0	0	695.789	0	0	403	MD14G1177400
n/a_1541	Chr14:27855207|27873025	0	0	5.12084	0	0	17818	n/a
MD14G1191600_2	Chr14:28259631|28263126	0	0	80.2298	0	0	3495	MD14G1191600
MD14G1192000_1	Chr14:28295833|28296064	0	0	804.396	0	0	231	MD14G1192000
MD14G1192000_2	Chr14:28295996|28296253	0	0	1091.06	0	0	257	MD14G1192000
MD14G1192600_1	Chr14:28354136|28354326	0	0	903.398	0	0	101	MD14G1192600
MD14G1198000_1	Chr14:28807903|28809258	0	0	261.442	0	0	349	MD14G1198000
MD14G1199800_1	Chr14:28910517|28910781	0	0	708.088	0	0	264	MD14G1199800
MD14G1201100_2	Chr14:29008011|29008206	0	0	958.643	0	0	195	MD14G1201100
MD14G1201100_3	Chr14:29009065|29009222	0	0	1190.67	0	0	157	MD14G1201100
MD14G1203800_1	Chr14:29208417|29210331	0	0	394.423	0	0	694	MD14G1203800
MD14G1227200_1	Chr14:30831607|30832205	0	0	186.591	0	0	489	MD14G1227200
MD14G1239300_2	Chr14:31834098|31834276	0	0	512.602	0	0	178	MD14G1239300
n/a_1556	Chr14:32129760|32151707	0	0	8.51758	0	0	21947	n/a
MD14G1243900_1	Chr14:32230700|32231175	0	0	460.824	0	0	396	MD14G1243900
MD14G1044900_1	Chr14:4261118|4262592	0	0	347.463	0	0	538	MD14G1044900
n/a_1517	Chr14:4618186|4621160	0	0	1770.27	0	0	2974	n/a
MD14G1051700_1	Chr14:4948364|4951211	0	0	168.613	0	0	1663	MD14G1051700
MD14G1054000_1	Chr14:5424642|5425220	0	0	323.418	0	0	578	MD14G1054000
MD14G1007700_1	Chr14:786443|786849	0	0	275.659	0	0	331	MD14G1007700
MD14G1073100_1	Chr14:8136298|8137141	0	0	221.75	0	0	843	MD14G1073100
Apple_newGene_6276_1	Chr14:8907049|8907217	0	0	814.671	0	0	168	Apple_newGene_6276
n/a_1591	Chr15:10036686|10064531	0	0	3.27682	0	0	27845	n/a
MD15G1137600_1	Chr15:10100672|10101089	0	0	269.154	0	0	339	MD15G1137600
MD15G1140800_1	Chr15:10388509|10388800	0	0	313.55	0	0	291	MD15G1140800
MD15G1153000_3	Chr15:11328152|11328308	0	0	584.892	0	0	156	MD15G1153000
MD15G1155400_1	Chr15:11567728|11568105	0	0	985.758	0	0	377	MD15G1155400
MD15G1160000_1	Chr15:11982273|11982459	0	0	3015.09	0	0	186	MD15G1160000
MD15G1168800_1	Chr15:12979968|12980712	0	0	228.68	0	0	399	MD15G1168800
MD15G1178600_1	Chr15:14059968|14060145	0	0	1049.8	0	0	177	MD15G1178600
MD15G1188300_1	Chr15:14846577|14847042	0	0	265.83	0	0	466	MD15G1188300
MD15G1191400_1	Chr15:15057944|15058382	0	0	282.824	0	0	438	MD15G1191400
MD15G1191900_1	Chr15:15116250|15116884	0	0	435.875	0	0	314	MD15G1191900
MD15G1191900_2	Chr15:15117861|15118096	0	0	527.136	0	0	235	MD15G1191900
n/a_1604	Chr15:15220919|15229164	0	0	22.6726	0	0	8245	n/a
MD15G1201900_1	Chr15:16063720|16064935	0	0	232.171	0	0	393	MD15G1201900
MD15G1202900_1	Chr15:16134922|16135072	0	0	2695.2	0	0	150	MD15G1202900
MD15G1208500_1	Chr15:16642204|16642474	0	0	337.938	0	0	270	MD15G1208500
MD15G1208500_2	Chr15:16642263|16642449	0	0	1226.39	0	0	186	MD15G1208500
MD15G1208500_3	Chr15:16642537|16642707	0	0	536.724	0	0	170	MD15G1208500
MD15G1208500_4	Chr15:16643166|16643364	0	0	944.118	0	0	198	MD15G1208500
MD15G1213900_1	Chr15:17172490|17172973	0	0	766.129	0	0	366	MD15G1213900
MD15G1029400_1	Chr15:1794861|1795775	0	0	204.301	0	0	915	MD15G1029400
n/a_1606	Chr15:18735769|18794173	0	0	4.74383	0	0	58404	n/a
MD15G1251700_1	Chr15:21212077|21213740	0	0	145.292	0	0	628	MD15G1251700
MD15G1252800_1	Chr15:21342024|21342174	0	0	1246.24	0	0	150	MD15G1252800
MD15G1257200_1	Chr15:21879805|21880246	0	0	423.89	0	0	441	MD15G1257200
MD15G1267200_1	Chr15:22975254|22975874	0	0	1146.84	0	0	326	MD15G1267200
MD15G1276200_1	Chr15:24245136|24246450	0	0	245.301	0	0	505	MD15G1276200
MD15G1284300_1	Chr15:25744482|25744673	0	0	973.622	0	0	192	MD15G1284300
MD15G1291600_2	Chr15:26998065|26999562	0	0	248.25	0	0	499	MD15G1291600
MD15G1309900_1	Chr15:31121844|31122540	0	0	209.961	0	0	590	MD15G1309900
MD15G1319800_1	Chr15:33164756|33165130	0	0	243.966	0	0	374	MD15G1319800
n/a_1558	Chr15:350292|350518	0	0	548.128	0	0	226	n/a
MD15G1331600_1	Chr15:36775256|36776456	0	0	172.809	0	0	528	MD15G1331600
MD15G1006700_1	Chr15:372646|372949	0	0	301.133	0	0	303	MD15G1006700
MD15G1335700_1	Chr15:37592081|37593319	0	0	73.7021	0	0	1238	MD15G1335700
MD15G1336400_1	Chr15:37744973|37745455	0	0	236.381	0	0	386	MD15G1336400
MD15G1346400_1	Chr15:40752205|40752906	0	0	403.508	0	0	307	MD15G1346400
MD15G1348000_1	Chr15:41178828|41179017	0	0	655.434	0	0	189	MD15G1348000
MD15G1066500_1	Chr15:4628886|4629054	0	0	1106.04	0	0	168	MD15G1066500
MD15G1381000_1	Chr15:46894433|46894667	0	0	389.928	0	0	234	MD15G1381000
MD15G1383900_1	Chr15:47271927|47272080	0	0	809.653	0	0	153	MD15G1383900
MD15G1387600_2	Chr15:47954153|47954375	0	0	1644.02	0	0	222	MD15G1387600
MD15G1388600_1	Chr15:48114290|48114672	0	0	400.189	0	0	228	MD15G1388600
MD15G1071000_2	Chr15:4854247|4855090	0	0	353.375	0	0	529	MD15G1071000
n/a_1634	Chr15:49928318|49928535	0	0	1722.91	0	0	217	n/a
MD15G1399400_1	Chr15:50024231|50025329	0	0	399.603	0	0	310	MD15G1399400
MD15G1400300_1	Chr15:50079394|50082247	0	0	132.428	0	0	689	MD15G1400300
n/a_1639	Chr15:50753091|50776899	0	0	13.5534	0	0	23808	n/a
MD15G1427500_2	Chr15:52800012|52810254	0	0	75.8051	0	0	2466	MD15G1427500
n/a_1659	Chr15:52949121|52951401	0	0	81.9892	0	0	2280	n/a
MD15G1434200_1	Chr15:53445251|53445520	0	0	694.927	0	0	269	MD15G1434200
MD15G1435700_1	Chr15:53601577|53601860	0	0	322.414	0	0	283	MD15G1435700
n/a_1664	Chr15:53637097|53641543	0	0	287.315	0	0	4446	n/a
MD15G1442400_1	Chr15:54277385|54277628	0	0	1153.92	0	0	243	MD15G1442400
MD15G1084000_1	Chr15:5811438|5811589	0	0	820.377	0	0	151	MD15G1084000
MD15G1086800_1	Chr15:6018461|6020552	0	0	185.445	0	0	1002	MD15G1086800
MD15G1096500_1	Chr15:6743945|6744371	0	0	581.582	0	0	426	MD15G1096500
MD15G1098800_1	Chr15:6883390|6883561	0	0	1086.64	0	0	171	MD15G1098800
MD15G1098800_2	Chr15:6883412|6883582	0	0	728.688	0	0	170	MD15G1098800
n/a_1577	Chr15:7429946|7431730	0	0	69.4378	0	0	1784	n/a
n/a_1578	Chr15:7855100|7859738	0	0	106.837	0	0	4638	n/a
n/a_1582	Chr15:8049721|8052786	0	0	262.708	0	0	3065	n/a
MD15G1117700_1	Chr15:8389603|8390267	0	0	217.764	0	0	419	MD15G1117700
MD15G1014500_1	Chr15:850629|850815	0	0	490.555	0	0	186	MD15G1014500
MD15G1118900_1	Chr15:8542957|8543126	0	0	539.9	0	0	169	MD15G1118900
MD15G1126100_1	Chr15:9169103|9169331	0	0	800.378	0	0	228	MD15G1126100
n/a_1586	Chr15:9208267|9208451	0	0	743.83	0	0	184	n/a
MD15G1130800_5	Chr15:9445572|9445855	0	0	322.414	0	0	283	MD15G1130800
MD15G1133400_2	Chr15:9668850|9669414	0	0	400.189	0	0	228	MD15G1133400
n/a_1587	Chr15:9743307|9743468	0	0	769.422	0	0	161	n/a
MD15G1136000_1	Chr15:9926166|9926333	0	0	819.549	0	0	167	MD15G1136000
MD15G1136000_2	Chr15:9927301|9929543	0	0	563.077	0	0	330	MD15G1136000
MD16G1001600_2	Chr16:100132|100317	0	0	493.206	0	0	185	MD16G1001600
MD16G1137600_1	Chr16:10538130|10539572	0	0	97.9004	0	0	932	MD16G1137600
MD16G1139300_1	Chr16:10733008|10734435	0	0	128.511	0	0	710	MD16G1139300
MD16G1142300_1	Chr16:10946218|10946382	0	0	755.347	0	0	164	MD16G1142300
n/a_1709	Chr16:11282607|11362069	0	0	4.59305	0	0	79462	n/a
MD16G1152500_1	Chr16:12025997|12027777	0	0	177.22	0	0	699	MD16G1152500
MD16G1153700_1	Chr16:12187883|12188093	0	0	651.737	0	0	210	MD16G1153700
MD16G1021500_1	Chr16:1529976|1530200	0	0	1659.07	0	0	224	MD16G1021500
MD16G1021500_2	Chr16:1530236|1530508	0	0	670.906	0	0	272	MD16G1021500
n/a_1730	Chr16:16862115|16862333	0	0	852.364	0	0	218	n/a
MD16G1193400_2	Chr16:17162315|17162941	0	0	597.477	0	0	311	MD16G1193400
MD16G1193400_3	Chr16:17164976|17165138	0	0	764.673	0	0	162	MD16G1193400
MD16G1209200_1	Chr16:19749424|19749700	0	0	661.182	0	0	276	MD16G1209200
MD16G1213200_1	Chr16:20497737|20498153	0	0	417.094	0	0	297	MD16G1213200
MD16G1226700_1	Chr16:22994704|22995382	0	0	978.719	0	0	191	MD16G1226700
MD16G1227300_1	Chr16:23100905|23101102	0	0	948.91	0	0	197	MD16G1227300
MD16G1232700_1	Chr16:23928105|23930458	0	0	334.803	0	0	370	MD16G1232700
MD16G1232700_2	Chr16:23929219|23932161	0	0	137.002	0	0	666	MD16G1232700
MD16G1034600_1	Chr16:2477340|2477499	0	0	573.856	0	0	159	MD16G1034600
MD16G1240200_1	Chr16:25602174|25602326	0	0	814.98	0	0	152	MD16G1240200
n/a_1742	Chr16:26516467|26516933	0	0	265.83	0	0	466	n/a
MD16G1258600_1	Chr16:31248807|31250041	0	0	560.462	0	0	407	MD16G1258600
n/a_1677	Chr16:3134120|3134275	0	0	1206.03	0	0	155	n/a
MD16G1047200_1	Chr16:3277603|3277985	0	0	330.591	0	0	276	MD16G1047200
MD16G1266900_1	Chr16:34063079|34064503	0	0	183.25	0	0	676	MD16G1266900
MD16G1267600_1	Chr16:34360169|34360395	0	0	827.148	0	0	226	MD16G1267600
MD16G1049700_1	Chr16:3492552|3492754	0	0	451.699	0	0	202	MD16G1049700
MD16G1004600_2	Chr16:351561|352166	0	0	183.588	0	0	497	MD16G1004600
MD16G1272400_1	Chr16:35457975|35458128	0	0	1192.72	0	0	153	MD16G1272400
MD16G1054100_1	Chr16:3825999|3826294	0	0	877.631	0	0	213	MD16G1054100
n/a_1682	Chr16:3863866|3865571	0	0	164.459	0	0	1705	n/a
MD16G1061900_2	Chr16:4412165|4413373	0	0	145.989	0	0	625	MD16G1061900
n/a_1688	Chr16:4468850|4469015	0	0	1699.41	0	0	165	n/a
MD16G1067100_1	Chr16:4729824|4730363	0	0	616.303	0	0	402	MD16G1067100
MD16G1006500_1	Chr16:501805|502261	0	0	373.123	0	0	332	MD16G1006500
MD16G1084200_1	Chr16:5915619|5915774	0	0	588.665	0	0	155	MD16G1084200
MD16G1103000_1	Chr16:7218025|7218429	0	0	298.18	0	0	306	MD16G1103000
MD16G1109600_1	Chr16:7705709|7706268	0	0	893.003	0	0	314	MD16G1109600
MD16G1111400_1	Chr16:7822973|7823226	0	0	489.632	0	0	253	MD16G1111400
MD16G1112700_1	Chr16:7886507|7886676	0	0	1466	0	0	169	MD16G1112700
MD17G1119500_1	Chr17:10364816|10364969	0	0	1221.8	0	0	153	MD17G1119500
MD17G1128800_1	Chr17:11323553|11323743	0	0	977.976	0	0	190	MD17G1128800
n/a_1746	Chr17:113247|113502	0	0	536.724	0	0	255	n/a
MD17G1131000_1	Chr17:11550806|11552786	0	0	334.803	0	0	370	MD17G1131000
n/a_1751	Chr17:1213146|1220862	0	0	11.8252	0	0	7716	n/a
n/a_1800	Chr17:12186201|12187663	0	0	127.097	0	0	1462	n/a
MD17G1137400_1	Chr17:12313549|12314610	0	0	430.128	0	0	576	MD17G1137400
MD17G1143200_1	Chr17:12917306|12917517	0	0	648.648	0	0	211	MD17G1143200
MD17G1016300_1	Chr17:1315990|1316822	0	0	329.398	0	0	277	MD17G1016300
MD17G1018800_1	Chr17:1474873|1476053	0	0	206.462	0	0	900	MD17G1018800
MD17G1156800_1	Chr17:15075864|15079654	0	0	157.86	0	0	578	MD17G1156800
MD17G1161300_1	Chr17:15872759|15874001	0	0	376.416	0	0	606	MD17G1161300
MD17G1163800_1	Chr17:16206728|16206911	0	0	498.596	0	0	183	MD17G1163800
MD17G1022100_1	Chr17:1642088|1642250	0	0	563.229	0	0	162	MD17G1022100
MD17G1026400_1	Chr17:1897082|1897560	0	0	190.885	0	0	478	MD17G1026400
MD17G1176000_1	Chr17:19874278|19874481	0	0	1381.3	0	0	203	MD17G1176000
MD17G1032200_1	Chr17:2343953|2344878	0	0	512.602	0	0	356	MD17G1032200
MD17G1196800_1	Chr17:23577248|23577431	0	0	498.596	0	0	183	MD17G1196800
MD17G1197700_1	Chr17:23691373|23691540	0	0	1119.37	0	0	167	MD17G1197700
MD17G1197800_1	Chr17:23705207|23706283	0	0	232.171	0	0	393	MD17G1197800
MD17G1198500_1	Chr17:23896753|23897632	0	0	406.127	0	0	337	MD17G1198500
MD17G1033700_1	Chr17:2406074|2406979	0	0	662.444	0	0	187	MD17G1033700
MD17G1212100_1	Chr17:25922277|25923284	0	0	1602.3	0	0	175	MD17G1212100
n/a_1763	Chr17:2603531|2620758	0	0	7.94478	0	0	17227	n/a
MD17G1213900_1	Chr17:26082369|26084945	0	0	601.344	0	0	309	MD17G1213900
MD17G1215200_1	Chr17:26215656|26218159	0	0	182.73	0	0	749	MD17G1215200
MD17G1215200_2	Chr17:26221519|26222409	0	0	143.239	0	0	637	MD17G1215200
MD17G1215200_3	Chr17:26225179|26225398	0	0	853.586	0	0	219	MD17G1215200
MD17G1223700_1	Chr17:27244072|27244234	0	0	1153.92	0	0	162	MD17G1223700
n/a_1818	Chr17:28605413|28689442	0	0	18.2206	0	0	84029	n/a
MD17G1242600_1	Chr17:29169776|29169929	0	0	1192.72	0	0	153	MD17G1242600
MD17G1040600_1	Chr17:2958170|2958702	0	0	205.041	0	0	445	MD17G1040600
MD17G1042300_1	Chr17:3102309|3102481	0	0	720.215	0	0	172	MD17G1042300
n/a_1828	Chr17:31886191|31929899	0	0	11.3368	0	0	43708	n/a
MD17G1264400_1	Chr17:32503814|32503991	0	0	1049.8	0	0	177	MD17G1264400
MD17G1266600_1	Chr17:32700260|32703841	0	0	94.2595	0	0	968	MD17G1266600
MD17G1272200_1	Chr17:33425951|33426191	0	0	774.231	0	0	240	MD17G1272200
n/a_1844	Chr17:33670251|33751637	0	0	2.24223	0	0	81386	n/a
MD17G1277500_1	Chr17:33758541|33759330	0	0	173.466	0	0	789	MD17G1277500
MD17G1277500_3	Chr17:33766283|33766511	0	0	1081.89	0	0	229	MD17G1277500
MD17G1278800_1	Chr17:33866574|33866832	0	0	720.215	0	0	258	MD17G1278800
MD17G1281100_1	Chr17:34075794|34075958	0	0	755.347	0	0	164	MD17G1281100
MD17G1049900_1	Chr17:3683679|3684204	0	0	173.796	0	0	525	MD17G1049900
n/a_1766	Chr17:4798540|4824789	0	0	157.097	0	0	26249	n/a
MD17G1001300_1	Chr17:51197|51347	0	0	912.431	0	0	150	MD17G1001300
MD17G1070600_2	Chr17:5702839|5703007	0	0	1112.71	0	0	168	MD17G1070600
MD17G1073900_1	Chr17:6007270|6007466	0	0	632.025	0	0	196	MD17G1073900
MD17G1074400_1	Chr17:6029151|6029568	0	0	218.809	0	0	417	MD17G1074400
MD17G1074400_2	Chr17:6030406|6030737	0	0	564.759	0	0	331	MD17G1074400
n/a_1774	Chr17:6296154|6327108	0	0	32.4247	0	0	30954	n/a
n/a_1777	Chr17:6430776|6452001	0	0	120.368	0	0	21225	n/a
MD17G1089900_1	Chr17:7375434|7376070	0	0	419.922	0	0	295	MD17G1089900
MD17G1001400_1	Chr17:84013|85758	0	0	316.482	0	0	886	MD17G1001400
MD17G1104900_1	Chr17:8903355|8904820	0	0	231.114	0	0	536	MD17G1104900
MD17G1105600_1	Chr17:8943914|8944150	0	0	384.992	0	0	237	MD17G1105600
MD17G1108500_1	Chr17:9310932|9311118	0	0	490.555	0	0	186	MD17G1108500
MD17G1113400_1	Chr17:9725332|9725496	0	0	2279.7	0	0	164	MD17G1113400

## Sheet: Table S7-5
Table S7-5 Expression of circRNAs in flower only
New_ID	circRNA_ID	Flower	Phloem	Leaf	Root	Fruit	geneLength	gene_id
MD00G1055200_1	Chr00:10320213|10320890	190.642	0	0	0	0	596	MD00G1055200
n/a_2	Chr00:1064842|1065025	756.355	0	0	0	0	183	n/a
n/a_23	Chr00:10720251|10720444	752.446	0	0	0	0	193	n/a
MD00G1083700_1	Chr00:16667445|16669162	175.389	0	0	0	0	828	MD00G1083700
MD00G1085100_1	Chr00:17087928|17088581	454.492	0	0	0	0	250	MD00G1085100
MD00G1087700_1	Chr00:17808320|17808493	1066.77	0	0	0	0	173	MD00G1087700
MD00G1089700_1	Chr00:18514448|18515153	430.39	0	0	0	0	264	MD00G1089700
MD00G1090900_1	Chr00:18744403|18744580	546.976	0	0	0	0	177	MD00G1090900
MD00G1091800_4	Chr00:19235211|19245366	165.779	0	0	0	0	584	MD00G1091800
MD00G1105000_1	Chr00:21988167|21988415	372.078	0	0	0	0	248	MD00G1105000
MD00G1105000_2	Chr00:21988187|21988372	523.323	0	0	0	0	185	MD00G1105000
MD00G1107800_1	Chr00:22535335|22535728	246.348	0	0	0	0	393	MD00G1107800
MD00G1108000_1	Chr00:22634342|22637236	44.0665	0	0	0	0	2094	MD00G1108000
MD00G1109200_1	Chr00:22915021|22915198	641.937	0	0	0	0	177	MD00G1109200
MD00G1111900_1	Chr00:23585185|23585379	475.646	0	0	0	0	194	MD00G1111900
MD00G1118600_1	Chr00:25338038|25338259	438.076	0	0	0	0	221	MD00G1118600
MD00G1001400_2	Chr00:290811|291414	160.555	0	0	0	0	603	MD00G1001400
MD00G1149500_1	Chr00:32911083|32911996	582.681	0	0	0	0	390	MD00G1149500
MD00G1156200_1	Chr00:34420898|34421075	521.33	0	0	0	0	177	MD00G1156200
MD00G1019700_2	Chr00:3622680|3624923	165.665	0	0	0	0	557	MD00G1019700
n/a_11	Chr00:3731398|3803321	3.94946	0	0	0	0	71923	n/a
MD00G1178300_1	Chr00:41606732|41606956	432.209	0	0	0	0	224	MD00G1178300
MD00G1025800_1	Chr00:4458460|4458649	768.371	0	0	0	0	189	MD00G1025800
MD00G1034800_1	Chr00:6077902|6080422	218.543	0	0	0	0	443	MD00G1034800
n/a_14	Chr00:6592846|6593004	584.021	0	0	0	0	158	n/a
n/a_16	Chr00:6748215|6748474	658.048	0	0	0	0	259	n/a
n/a_19	Chr00:6748729|6751911	30.4257	0	0	0	0	3182	n/a
MD00G1039200_2	Chr00:6749005|6749161	728.352	0	0	0	0	156	MD00G1039200
MD00G1040500_1	Chr00:6917895|6918099	452.33	0	0	0	0	204	MD00G1040500
MD00G1005700_1	Chr00:815745|815924	515.505	0	0	0	0	179	MD00G1005700
MD01G1044900_2	Chr01:14446211|14446388	521.33	0	0	0	0	177	MD01G1044900
MD01G1051100_4	Chr01:15477243|15477416	533.383	0	0	0	0	173	MD01G1051100
MD01G1065000_1	Chr01:16884515|16885857	73.2926	0	0	0	0	1259	MD01G1065000
MD01G1069200_1	Chr01:17324650|17324805	1099.58	0	0	0	0	155	MD01G1069200
MD01G1072600_1	Chr01:17783278|17785127	229.541	0	0	0	0	804	MD01G1072600
MD01G1073600_2	Chr01:17915979|17916159	537.86	0	0	0	0	180	MD01G1073600
MD01G1080500_1	Chr01:18779397|18779788	247.608	0	0	0	0	391	MD01G1080500
MD01G1082300_1	Chr01:18882826|18887278	102.64	0	0	0	0	2214	MD01G1082300
MD01G1083800_1	Chr01:19020886|19021044	919.127	0	0	0	0	158	MD01G1083800
n/a_47	Chr01:20443264|20443646	253.442	0	0	0	0	382	n/a
n/a_49	Chr01:20690040|20706016	5.77587	0	0	0	0	15976	n/a
MD01G1102600_2	Chr01:21486831|21487142	296.705	0	0	0	0	311	MD01G1102600
MD01G1108000_2	Chr01:22085555|22085979	267.978	0	0	0	0	424	MD01G1108000
MD01G1108500_1	Chr01:22141933|22143058	593.955	0	0	0	0	326	MD01G1108500
MD01G1108700_1	Chr01:22157966|22158146	631.238	0	0	0	0	180	MD01G1108700
MD01G1116700_2	Chr01:23037609|23039049	192.255	0	0	0	0	591	MD01G1116700
MD01G1119600_1	Chr01:23340119|23340306	1035.45	0	0	0	0	187	MD01G1119600
MD01G1138900_1	Chr01:24842835|24843378	339.872	0	0	0	0	543	MD01G1138900
MD01G1152600_1	Chr01:26115235|26115573	272.199	0	0	0	0	339	MD01G1152600
MD01G1160800_1	Chr01:26633120|26633878	186.415	0	0	0	0	495	MD01G1160800
MD01G1161200_1	Chr01:26656091|26656336	695.65	0	0	0	0	245	MD01G1161200
MD01G1165200_2	Chr01:26930935|26931100	688.624	0	0	0	0	165	MD01G1165200
MD01G1172900_1	Chr01:27482036|27482797	349.528	0	0	0	0	264	MD01G1172900
MD01G1182700_1	Chr01:28122587|28125270	84.7765	0	0	0	0	1142	MD01G1182700
MD01G1185900_1	Chr01:28475457|28475719	433.675	0	0	0	0	262	MD01G1185900
n/a_95	Chr01:29260567|29271137	48.373	0	0	0	0	10570	n/a
n/a_97	Chr01:29335419|29360019	3.75103	0	0	0	0	24600	n/a
MD01G1195200_2	Chr01:29360152|29360303	641.157	0	0	0	0	151	MD01G1195200
MD01G1196700_1	Chr01:29459540|29459994	396.599	0	0	0	0	349	MD01G1196700
MD01G1208700_1	Chr01:30317921|30318139	521.206	0	0	0	0	218	MD01G1208700
MD01G1211300_1	Chr01:30486966|30487272	963.331	0	0	0	0	201	MD01G1211300
MD01G1216600_1	Chr01:30946840|30947493	187.552	0	0	0	0	492	MD01G1216600
MD01G1218500_1	Chr01:31069880|31070099	442.076	0	0	0	0	219	MD01G1218500
MD01G1218500_2	Chr01:31070168|31070375	467.704	0	0	0	0	207	MD01G1218500
MD01G1218700_1	Chr01:31085700|31085888	772.458	0	0	0	0	188	MD01G1218700
MD01G1220700_1	Chr01:31275461|31276773	70.3318	0	0	0	0	1312	MD01G1220700
MD01G1220800_1	Chr01:31286763|31286940	962.906	0	0	0	0	177	MD01G1220800
MD01G1225800_1	Chr01:31643075|31643462	331.926	0	0	0	0	278	MD01G1225800
MD01G1240200_1	Chr01:32619818|32620562	265.923	0	0	0	0	347	MD01G1240200
n/a_228	Chr02:10135576|10141002	62.4496	0	0	0	0	5426	n/a
MD02G1130200_1	Chr02:10491199|10491866	138.344	0	0	0	0	667	MD02G1130200
n/a_233	Chr02:10516314|10522178	31.4718	0	0	0	0	5864	n/a
MD02G1140100_2	Chr02:11686002|11686244	381.303	0	0	0	0	242	MD02G1140100
MD02G1146200_1	Chr02:12081539|12081719	806.789	0	0	0	0	180	MD02G1146200
MD02G1146200_2	Chr02:12081659|12081839	537.86	0	0	0	0	180	MD02G1146200
MD02G1016100_1	Chr02:1221531|1221694	849.16	0	0	0	0	163	MD02G1016100
MD02G1159300_2	Chr02:13364245|13366209	173.503	0	0	0	0	837	MD02G1159300
MD02G1020200_1	Chr02:1442198|1442567	250.069	0	0	0	0	369	MD02G1020200
MD02G1168400_3	Chr02:14452714|14453406	678.346	0	0	0	0	335	MD02G1168400
MD02G1021200_1	Chr02:1498422|1499285	157.198	0	0	0	0	587	MD02G1021200
n/a_253	Chr02:15537004|15537359	259.931	0	0	0	0	355	n/a
MD02G1023000_1	Chr02:1607603|1607845	381.303	0	0	0	0	242	MD02G1023000
MD02G1181200_1	Chr02:16291583|16293294	182.669	0	0	0	0	530	MD02G1181200
MD02G1184400_1	Chr02:16704613|16705265	174.268	0	0	0	0	652	MD02G1184400
MD02G1184400_2	Chr02:16705804|16705995	1189.77	0	0	0	0	191	MD02G1184400
MD02G1184400_3	Chr02:16706356|16707098	449.028	0	0	0	0	411	MD02G1184400
MD02G1190300_1	Chr02:17547337|17547491	628.667	0	0	0	0	154	MD02G1190300
n/a_257	Chr02:17754975|17810547	93.0296	0	0	0	0	55572	n/a
MD02G1195800_1	Chr02:18766064|18766333	539.859	0	0	0	0	269	MD02G1195800
MD02G1213500_1	Chr02:23302591|23302828	408.501	0	0	0	0	237	MD02G1213500
MD02G1214300_2	Chr02:23827802|23828102	307.584	0	0	0	0	300	MD02G1214300
MD02G1218200_1	Chr02:25355769|25361086	52.6987	0	0	0	0	1751	MD02G1218200
MD02G1032900_2	Chr02:2584217|2584391	649.274	0	0	0	0	175	MD02G1032900
MD02G1036700_1	Chr02:2783954|2785378	394.339	0	0	0	0	234	MD02G1036700
MD02G1233200_1	Chr02:27959561|27959723	854.401	0	0	0	0	162	MD02G1233200
n/a_265	Chr02:29236875|29252120	9.07924	0	0	0	0	15245	n/a
MD02G1254000_1	Chr02:30562192|30562362	569.498	0	0	0	0	170	MD02G1254000
n/a_271	Chr02:30704466|30704628	1753.44	0	0	0	0	162	n/a
MD02G1255700_1	Chr02:30767317|30767687	261.661	0	0	0	0	370	MD02G1255700
n/a_286	Chr02:32078198|32078445	460.012	0	0	0	0	247	n/a
MD02G1266700_1	Chr02:32083357|32083507	1613.58	0	0	0	0	150	MD02G1266700
n/a_288	Chr02:32119229|32131999	18.9535	0	0	0	0	12770	n/a
n/a_289	Chr02:32122050|32134466	7.43197	0	0	0	0	12416	n/a
n/a_143	Chr02:3289985|3364703	1.29574	0	0	0	0	74718	n/a
MD02G1279400_1	Chr02:33576670|33576822	747.519	0	0	0	0	152	MD02G1279400
MD02G1284000_1	Chr02:34077504|34078420	195.914	0	0	0	0	471	MD02G1284000
MD02G1042500_1	Chr02:3487272|3488111	138.969	0	0	0	0	664	MD02G1042500
MD02G1297300_1	Chr02:35251301|35252025	227.246	0	0	0	0	500	MD02G1297300
MD02G1043000_1	Chr02:3533225|3534110	164.671	0	0	0	0	690	MD02G1043000
n/a_312	Chr02:35719121|35742554	5.90676	0	0	0	0	23433	n/a
n/a_316	Chr02:36354313|36376576	12.7592	0	0	0	0	22263	n/a
MD02G1308700_1	Chr02:36393667|36394273	159.76	0	0	0	0	606	MD02G1308700
MD02G1046000_1	Chr02:3683687|3683909	415.655	0	0	0	0	222	MD02G1046000
MD02G1314300_1	Chr02:36963272|36963490	634.922	0	0	0	0	218	MD02G1314300
MD02G1317800_1	Chr02:37223361|37223524	692.822	0	0	0	0	164	MD02G1317800
n/a_152	Chr02:3910728|3919361	10.6887	0	0	0	0	8633	n/a
Apple_newGene_21821_3	Chr02:4261528|4343053	5.41681	0	0	0	0	17035	Apple_newGene_21821
Apple_newGene_21821_7	Chr02:4464872|4465315	384.728	0	0	0	0	443	Apple_newGene_21821
MD02G1007600_1	Chr02:481833|483498	292.842	0	0	0	0	776	MD02G1007600
n/a_159	Chr02:5383557|5401747	7.98362	0	0	0	0	18190	n/a
MD02G1068700_1	Chr02:5573989|5578517	50.9527	0	0	0	0	1811	MD02G1068700
n/a_164	Chr02:5664636|5739420	5.31772	0	0	0	0	74784	n/a
MD02G1008700_1	Chr02:566515|566855	895.877	0	0	0	0	206	MD02G1008700
Apple_newGene_21981_4	Chr02:5804562|5824815	27.9199	0	0	0	0	3305	Apple_newGene_21981
MD02G1090100_1	Chr02:7146155|7146367	456.673	0	0	0	0	212	MD02G1090100
MD02G1093500_1	Chr02:7442488|7442959	383.172	0	0	0	0	379	MD02G1093500
n/a_193	Chr02:7468111|7478467	98.7453	0	0	0	0	10356	n/a
MD02G1097200_1	Chr02:7675559|7675788	402.949	0	0	0	0	229	MD02G1097200
MD02G1102700_1	Chr02:8240875|8241955	216.104	0	0	0	0	448	MD02G1102700
n/a_210	Chr02:8460461|8460644	793.563	0	0	0	0	183	n/a
n/a_218	Chr02:8516330|8538247	17.2551	0	0	0	0	21917	n/a
MD02G1122100_1	Chr02:9945841|9947819	69.9409	0	0	0	0	1979	MD02G1122100
MD03G1000200_1	Chr03:10171|10366	473.207	0	0	0	0	195	MD03G1000200
MD03G1116100_1	Chr03:10319796|10321603	255.61	0	0	0	0	361	MD03G1116100
n/a_394	Chr03:10699185|10699359	530.318	0	0	0	0	174	n/a
n/a_396	Chr03:11878695|11911212	74.0923	0	0	0	0	32517	n/a
MD03G1126800_1	Chr03:12169161|12171902	179.524	0	0	0	0	771	MD03G1126800
n/a_397	Chr03:12690287|12773948	2.71627	0	0	0	0	83661	n/a
MD03G1001800_1	Chr03:137389|137563	556.406	0	0	0	0	174	MD03G1001800
MD03G1141100_1	Chr03:14861520|14861695	553.227	0	0	0	0	175	MD03G1141100
n/a_398	Chr03:15120707|15122024	73.5116	0	0	0	0	1317	n/a
MD03G1142800_1	Chr03:15193378|15193592	431.193	0	0	0	0	214	MD03G1142800
MD03G1147400_1	Chr03:16249174|16249363	488.229	0	0	0	0	189	MD03G1147400
MD03G1154000_1	Chr03:17599931|17601657	98.0899	0	0	0	0	987	MD03G1154000
MD03G1156800_1	Chr03:18452185|18452921	518.401	0	0	0	0	178	MD03G1156800
MD03G1156800_2	Chr03:18452185|18458275	176.16	0	0	0	0	645	MD03G1156800
MD03G1156800_3	Chr03:18456319|18458926	313.862	0	0	0	0	294	MD03G1156800
MD03G1157200_1	Chr03:18665301|18665862	405.073	0	0	0	0	561	MD03G1157200
MD03G1158600_1	Chr03:18839135|18839288	1485.27	0	0	0	0	153	MD03G1158600
n/a_339	Chr03:1894225|1894441	427.201	0	0	0	0	216	n/a
MD03G1159900_2	Chr03:19097604|19097801	468.403	0	0	0	0	197	MD03G1159900
MD03G1160600_1	Chr03:19276680|19278015	135.899	0	0	0	0	679	MD03G1160600
MD03G1024500_1	Chr03:2032845|2033631	237.874	0	0	0	0	407	MD03G1024500
MD03G1024500_2	Chr03:2033916|2034751	221.019	0	0	0	0	835	MD03G1024500
MD03G1163800_1	Chr03:20433035|20434892	234.418	0	0	0	0	413	MD03G1163800
MD03G1027100_2	Chr03:2184370|2184544	653.005	0	0	0	0	174	MD03G1027100
MD03G1168800_1	Chr03:22815187|22815388	481.665	0	0	0	0	201	MD03G1168800
MD03G1171100_2	Chr03:23224491|23225139	213.6	0	0	0	0	648	MD03G1171100
n/a_412	Chr03:23230156|23263620	36.4573	0	0	0	0	33464	n/a
MD03G1172500_2	Chr03:23530833|23534825	58.3925	0	0	0	0	1658	MD03G1172500
MD03G1003300_1	Chr03:236002|236155	742.633	0	0	0	0	153	MD03G1003300
n/a_414	Chr03:23673319|23683284	9.25994	0	0	0	0	9965	n/a
MD03G1174800_1	Chr03:23899312|23899463	641.157	0	0	0	0	151	MD03G1174800
MD03G1000500_1	Chr03:24242|24409	552.547	0	0	0	0	167	MD03G1000500
n/a_349	Chr03:2429254|2443679	23.4906	0	0	0	0	14425	n/a
MD03G1178500_1	Chr03:24548714|24549421	183.263	0	0	0	0	620	MD03G1178500
n/a_419	Chr03:24841694|24844265	37.6564	0	0	0	0	2571	n/a
MD03G1193000_1	Chr03:26540921|26541431	180.932	0	0	0	0	510	MD03G1193000
MD03G1197400_1	Chr03:26959714|26959915	565.288	0	0	0	0	201	MD03G1197400
MD03G1199100_3	Chr03:27260177|27260438	370.938	0	0	0	0	261	MD03G1199100
MD03G1034300_5	Chr03:2747259|2747414	624.611	0	0	0	0	155	MD03G1034300
MD03G1203100_1	Chr03:27718586|27718801	528.479	0	0	0	0	215	MD03G1203100
n/a_429	Chr03:28265461|28298277	166.688	0	0	0	0	32816	n/a
MD03G1036600_2	Chr03:2908131|2908386	361.864	0	0	0	0	255	MD03G1036600
MD03G1214100_1	Chr03:29382707|29384068	225.144	0	0	0	0	757	MD03G1214100
MD03G1214700_1	Chr03:29484036|29484303	518.401	0	0	0	0	267	MD03G1214700
MD03G1037300_1	Chr03:2957892|2958066	979.508	0	0	0	0	174	MD03G1037300
MD03G1039300_1	Chr03:3132127|3132373	692.822	0	0	0	0	246	MD03G1039300
n/a_357	Chr03:3275220|3279313	22.5447	0	0	0	0	4093	n/a
n/a_441	Chr03:33200587|33218034	7.93334	0	0	0	0	17447	n/a
MD03G1252200_1	Chr03:33974977|33975135	612.751	0	0	0	0	158	MD03G1252200
n/a_444	Chr03:34381222|34381408	520.509	0	0	0	0	186	n/a
MD03G1274300_1	Chr03:35724918|35725173	723.728	0	0	0	0	255	MD03G1274300
MD03G1277600_1	Chr03:35980354|35980912	173.503	0	0	0	0	558	MD03G1277600
n/a_456	Chr03:36631705|36633955	1140.26	0	0	0	0	2250	n/a
n/a_462	Chr03:36633863|36637817	57.4724	0	0	0	0	3954	n/a
MD03G1287500_1	Chr03:36655076|36655229	603.107	0	0	0	0	153	MD03G1287500
n/a_362	Chr03:3890284|3924525	6.63666	0	0	0	0	34241	n/a
MD03G1049800_1	Chr03:3976158|3976313	936.917	0	0	0	0	155	MD03G1049800
MD03G1052900_1	Chr03:4234877|4236021	268.557	0	0	0	0	721	MD03G1052900
MD03G1052900_3	Chr03:4236874|4237079	554.258	0	0	0	0	205	MD03G1052900
MD03G1005700_1	Chr03:465972|466123	752.469	0	0	0	0	151	MD03G1005700
MD03G1068500_1	Chr03:5567836|5568028	1775.36	0	0	0	0	192	MD03G1068500
n/a_377	Chr03:5675813|5683565	59.5171	0	0	0	0	7752	n/a
MD03G1071900_2	Chr03:5852926|5853106	1578.1	0	0	0	0	108	MD03G1071900
MD03G1007400_2	Chr03:596273|596442	1008.49	0	0	0	0	169	MD03G1007400
MD03G1075900_1	Chr03:6158975|6159137	569.601	0	0	0	0	162	MD03G1075900
MD03G1077300_1	Chr03:6277484|6277754	683.521	0	0	0	0	270	MD03G1077300
MD03G1103200_1	Chr03:8826059|8826609	176.027	0	0	0	0	550	MD03G1103200
MD03G1109800_1	Chr03:9541019|9542109	307.348	0	0	0	0	315	MD03G1109800
MD04G1013500_1	Chr04:1540461|1540644	529.042	0	0	0	0	183	MD04G1013500
MD04G1016500_2	Chr04:1778846|1779122	350.778	0	0	0	0	276	MD04G1016500
MD04G1100500_1	Chr04:18588291|18588740	1128.7	0	0	0	0	151	MD04G1100500
MD04G1100900_4	Chr04:18656815|18657043	849.252	0	0	0	0	228	MD04G1100900
Apple_newGene_30967_1	Chr04:18733652|18734487	110.509	0	0	0	0	835	Apple_newGene_30967
MD04G1110900_2	Chr04:19557464|19558818	632.818	0	0	0	0	617	MD04G1110900
n/a_516	Chr04:21160512|21160707	473.207	0	0	0	0	195	n/a
MD04G1125600_4	Chr04:21213201|21213410	543.65	0	0	0	0	209	MD04G1125600
MD04G1125600_9	Chr04:21213490|21213706	448.216	0	0	0	0	216	MD04G1125600
MD04G1129800_1	Chr04:21603568|21603733	586.756	0	0	0	0	165	MD04G1129800
MD04G1130000_1	Chr04:21661135|21661482	265.923	0	0	0	0	347	MD04G1130000
MD04G1145300_1	Chr04:23419877|23420052	553.227	0	0	0	0	175	MD04G1145300
MD04G1148900_1	Chr04:23698589|23698746	587.741	0	0	0	0	157	MD04G1148900
MD04G1021500_1	Chr04:2549732|2550071	285.589	0	0	0	0	339	MD04G1021500
MD04G1170200_1	Chr04:26086892|26087098	469.974	0	0	0	0	206	MD04G1170200
MD04G1174000_1	Chr04:26571744|26571995	452.681	0	0	0	0	251	MD04G1174000
MD04G1175700_2	Chr04:26679578|26681018	295.167	0	0	0	0	984	MD04G1175700
MD04G1183100_1	Chr04:27446121|27446664	573.853	0	0	0	0	198	MD04G1183100
n/a_529	Chr04:27666192|27670745	20.2669	0	0	0	0	4553	n/a
n/a_532	Chr04:27729212|27744432	6.06277	0	0	0	0	15220	n/a
n/a_533	Chr04:27729671|27744779	26.3225	0	0	0	0	15108	n/a
MD04G1194100_1	Chr04:28353632|28353785	632.776	0	0	0	0	153	MD04G1194100
MD04G1197000_1	Chr04:28519478|28519637	870.522	0	0	0	0	159	MD04G1197000
MD04G1198800_1	Chr04:28621068|28621291	509.52	0	0	0	0	223	MD04G1198800
MD04G1201200_1	Chr04:28738613|28740528	86.4001	0	0	0	0	1068	MD04G1201200
MD04G1202800_1	Chr04:28862922|28864277	254.107	0	0	0	0	762	MD04G1202800
n/a_541	Chr04:29014438|29030546	33.1822	0	0	0	0	16108	n/a
MD04G1216600_1	Chr04:29915624|29915798	834.61	0	0	0	0	174	MD04G1216600
MD04G1216600_2	Chr04:29917111|29917563	267.465	0	0	0	0	345	MD04G1216600
MD04G1025900_1	Chr04:3023662|3024946	364.725	0	0	0	0	253	MD04G1025900
MD04G1225600_1	Chr04:30551496|30551721	504.991	0	0	0	0	225	MD04G1225600
MD04G1228600_1	Chr04:30896321|30896612	332.697	0	0	0	0	291	MD04G1228600
MD04G1230600_1	Chr04:31051183|31053167	163.958	0	0	0	0	693	MD04G1230600
n/a_547	Chr04:31069388|31069581	501.631	0	0	0	0	193	n/a
MD04G1235300_1	Chr04:31433455|31433678	413.791	0	0	0	0	223	MD04G1235300
MD04G1235400_1	Chr04:31441735|31441936	565.288	0	0	0	0	201	MD04G1235400
MD04G1027600_1	Chr04:3158811|3159052	401.721	0	0	0	0	241	MD04G1027600
n/a_552	Chr04:31870171|31872078	48.3877	0	0	0	0	1907	n/a
MD04G1028300_1	Chr04:3219730|3220117	361.249	0	0	0	0	268	MD04G1028300
MD04G1028600_1	Chr04:3238412|3238610	1721.56	0	0	0	0	198	MD04G1028600
MD04G1031200_1	Chr04:3482187|3482498	530.948	0	0	0	0	214	MD04G1031200
MD04G1031500_1	Chr04:3516717|3516954	479.421	0	0	0	0	237	MD04G1031500
MD04G1038500_1	Chr04:4257153|4257367	452.405	0	0	0	0	214	MD04G1038500
MD04G1038500_2	Chr04:4258692|4260132	116.224	0	0	0	0	833	MD04G1038500
MD04G1039200_1	Chr04:4300543|4300741	466.037	0	0	0	0	198	MD04G1039200
MD04G1040400_1	Chr04:4724360|4726045	571.011	0	0	0	0	404	MD04G1040400
n/a_502	Chr04:6232453|6246599	12.0482	0	0	0	0	14146	n/a
MD04G1057200_2	Chr04:7021066|7022010	218.921	0	0	0	0	843	MD04G1057200
MD04G1061500_2	Chr04:8135641|8135803	896.433	0	0	0	0	162	MD04G1061500
MD04G1061900_1	Chr04:8171189|8172385	182.844	0	0	0	0	757	MD04G1061900
MD04G1007800_1	Chr04:883038|884414	156.505	0	0	0	0	726	MD04G1007800
MD04G1007900_3	Chr04:895772|896062	500.766	0	0	0	0	290	MD04G1007900
MD05G1057800_1	Chr05:10040251|10040414	1394.15	0	0	0	0	163	MD05G1057800
MD05G1065100_1	Chr05:11590063|11590733	275.449	0	0	0	0	670	MD05G1065100
MD05G1073600_1	Chr05:15473274|15473457	529.042	0	0	0	0	183	MD05G1073600
MD05G1073600_2	Chr05:15473808|15474000	591.786	0	0	0	0	192	MD05G1073600
MD05G1082000_1	Chr05:17177527|17177704	1093.95	0	0	0	0	177	MD05G1082000
MD05G1087100_2	Chr05:18552223|18553980	392.887	0	0	0	0	723	MD05G1087100
MD05G1008600_6	Chr05:1858738|1858899	601.334	0	0	0	0	161	MD05G1008600
n/a_564	Chr05:20407628|20407779	916.643	0	0	0	0	151	n/a
MD05G1098600_1	Chr05:20539035|20539724	452.33	0	0	0	0	306	MD05G1098600
MD05G1101500_1	Chr05:20964534|20964688	628.667	0	0	0	0	154	MD05G1101500
MD05G1117800_2	Chr05:23877015|23877201	520.509	0	0	0	0	186	MD05G1117800
MD05G1120100_1	Chr05:24165513|24165808	328.186	0	0	0	0	295	MD05G1120100
MD05G1121300_1	Chr05:24406667|24406841	979.508	0	0	0	0	174	MD05G1121300
MD05G1122700_1	Chr05:24546805|24547455	900.602	0	0	0	0	215	MD05G1122700
MD05G1123800_2	Chr05:24620507|24620663	591.509	0	0	0	0	156	MD05G1123800
MD05G1124200_1	Chr05:24645485|24645635	968.147	0	0	0	0	150	MD05G1124200
MD05G1012600_1	Chr05:2493436|2493637	722.498	0	0	0	0	201	MD05G1012600
MD05G1128400_1	Chr05:25235409|25235563	628.667	0	0	0	0	154	MD05G1128400
Apple_newGene_32886_2	Chr05:2597640|2599044	80.928	0	0	0	0	1404	Apple_newGene_32886
n/a_578	Chr05:26393193|26394153	96.1202	0	0	0	0	960	n/a
MD05G1145700_2	Chr05:27675120|27678963	136.895	0	0	0	0	830	MD05G1145700
n/a_586	Chr05:28126230|28160903	2.79222	0	0	0	0	34673	n/a
n/a_588	Chr05:28453544|28466519	13.1356	0	0	0	0	12975	n/a
MD05G1164800_1	Chr05:29342474|29342641	579.729	0	0	0	0	167	MD05G1164800
MD05G1017800_1	Chr05:3108409|3108565	616.654	0	0	0	0	157	MD05G1017800
MD05G1184900_2	Chr05:31342550|31343450	389.119	0	0	0	0	438	MD05G1184900
MD05G1185500_1	Chr05:31416056|31416211	1099.58	0	0	0	0	155	MD05G1185500
MD05G1192400_1	Chr05:32054562|32055039	245.101	0	0	0	0	395	MD05G1192400
MD05G1199700_1	Chr05:32734815|32735068	449.102	0	0	0	0	253	MD05G1199700
MD05G1204400_1	Chr05:33404983|33405216	487.652	0	0	0	0	233	MD05G1204400
MD05G1021100_1	Chr05:3557798|3557954	2333.74	0	0	0	0	156	MD05G1021100
MD05G1021100_2	Chr05:3558010|3558350	271.398	0	0	0	0	340	MD05G1021100
MD05G1021100_3	Chr05:3558023|3558185	701.376	0	0	0	0	162	MD05G1021100
MD05G1021100_4	Chr05:3558134|3558302	676.327	0	0	0	0	168	MD05G1021100
n/a_609	Chr05:36214536|36268376	3.59639	0	0	0	0	53840	n/a
n/a_610	Chr05:36221550|36275677	1.78866	0	0	0	0	54127	n/a
n/a_611	Chr05:36223206|36277248	18.8105	0	0	0	0	54042	n/a
MD05G1230600_1	Chr05:36413724|36413979	379.666	0	0	0	0	255	MD05G1230600
n/a_612	Chr05:36414904|36415164	874.022	0	0	0	0	260	n/a
n/a_621	Chr05:36802434|36850954	1.99536	0	0	0	0	48520	n/a
MD05G1240600_1	Chr05:37127204|37127360	728.352	0	0	0	0	156	MD05G1240600
MD05G1242300_1	Chr05:37512855|37513047	504.243	0	0	0	0	192	MD05G1242300
n/a_624	Chr05:37698188|37714628	5.88897	0	0	0	0	16440	n/a
MD05G1023200_1	Chr05:3885413|3885613	568.114	0	0	0	0	200	MD05G1023200
MD05G1023200_2	Chr05:3890742|3890901	608.898	0	0	0	0	159	MD05G1023200
n/a_555	Chr05:3900331|3902215	77.0818	0	0	0	0	1884	n/a
MD05G1023700_1	Chr05:3916315|3916468	632.776	0	0	0	0	153	MD05G1023700
MD05G1024400_1	Chr05:3969126|3969302	524.292	0	0	0	0	176	MD05G1024400
MD05G1024500_1	Chr05:3991608|3991791	504.237	0	0	0	0	183	MD05G1024500
MD05G1263900_1	Chr05:39932006|39932213	467.704	0	0	0	0	207	MD05G1263900
MD05G1271600_1	Chr05:40696476|40696942	207.757	0	0	0	0	466	MD05G1271600
n/a_635	Chr05:40945894|40949206	27.8609	0	0	0	0	3312	n/a
MD05G1276000_1	Chr05:41049073|41051428	101.068	0	0	0	0	913	MD05G1276000
MD05G1278600_1	Chr05:41302280|41302481	459.081	0	0	0	0	201	MD05G1278600
MD05G1286900_1	Chr05:41951318|41951548	4090.76	0	0	0	0	71	MD05G1286900
MD05G1291000_1	Chr05:42268156|42268355	695.543	0	0	0	0	199	MD05G1291000
MD05G1294200_1	Chr05:42677877|42678045	672.325	0	0	0	0	169	MD05G1294200
MD05G1298500_1	Chr05:43193372|43193557	523.323	0	0	0	0	185	MD05G1298500
MD05G1299200_1	Chr05:43253513|43253954	276.614	0	0	0	0	350	MD05G1299200
MD05G1300400_1	Chr05:43357625|43357843	423.281	0	0	0	0	218	MD05G1300400
MD05G1309700_1	Chr05:44032901|44033057	728.352	0	0	0	0	156	MD05G1309700
MD05G1310400_3	Chr05:44109262|44109448	610.876	0	0	0	0	186	MD05G1310400
MD05G1311900_2	Chr05:44188675|44188850	973.91	0	0	0	0	175	MD05G1311900
MD05G1314000_1	Chr05:44429509|44429660	641.157	0	0	0	0	151	MD05G1314000
MD05G1315100_1	Chr05:44476711|44477182	672.918	0	0	0	0	281	MD05G1315100
MD05G1319300_1	Chr05:44705118|44705343	430.288	0	0	0	0	225	MD05G1319300
MD05G1323000_1	Chr05:45031789|45032254	198.016	0	0	0	0	466	MD05G1323000
n/a_668	Chr05:45994212|45998602	21.0194	0	0	0	0	4390	n/a
MD05G1341400_3	Chr05:46186552|46187236	249.173	0	0	0	0	684	MD05G1341400
MD05G1341400_15	Chr05:46187159|46187331	660.598	0	0	0	0	172	MD05G1341400
MD05G1343800_1	Chr05:46364255|46364466	538.497	0	0	0	0	211	MD05G1343800
n/a_673	Chr05:46432213|46476607	58.1624	0	0	0	0	44394	n/a
MD05G1346000_1	Chr05:46565444|46565658	452.405	0	0	0	0	214	MD05G1346000
n/a_680	Chr05:46742729|46742972	379.734	0	0	0	0	243	n/a
MD05G1354000_1	Chr05:47072308|47072473	559.245	0	0	0	0	165	MD05G1354000
MD05G1355700_1	Chr05:47189098|47189389	390.457	0	0	0	0	291	MD05G1355700
MD05G1029400_3	Chr05:4818184|4818647	544.397	0	0	0	0	339	MD05G1029400
MD05G1030700_2	Chr05:4916881|4917342	210.01	0	0	0	0	461	MD05G1030700
MD05G1047100_1	Chr05:7948255|7948466	688.256	0	0	0	0	211	MD05G1047100
MD05G1049700_2	Chr05:8627766|8627944	957.496	0	0	0	0	178	MD05G1049700
MD06G1012300_2	Chr06:1535536|1536318	223.969	0	0	0	0	618	MD06G1012300
MD06G1015000_2	Chr06:1895920|1896799	527.288	0	0	0	0	350	MD06G1015000
MD06G1084500_1	Chr06:20739460|20739611	1504.94	0	0	0	0	151	MD06G1084500
MD06G1091700_1	Chr06:22123926|22125362	181.301	0	0	0	0	534	MD06G1091700
MD06G1122100_2	Chr06:26335341|26335504	593.955	0	0	0	0	163	MD06G1122100
MD06G1132600_1	Chr06:27676828|27677150	576.766	0	0	0	0	197	MD06G1132600
MD06G1137600_3	Chr06:28279691|28279880	512.247	0	0	0	0	189	MD06G1137600
MD06G1137800_1	Chr06:28285588|28286728	92.8233	0	0	0	0	1043	MD06G1137800
MD06G1138700_1	Chr06:28360218|28363029	213.577	0	0	0	0	1064	MD06G1138700
n/a_724	Chr06:28767122|28772292	35.6965	0	0	0	0	5170	n/a
MD06G1160100_1	Chr06:30150464|30153316	125.828	0	0	0	0	903	MD06G1160100
n/a_730	Chr06:30198148|30208594	9.26811	0	0	0	0	10446	n/a
MD06G1161400_2	Chr06:30245882|30246176	493.953	0	0	0	0	294	MD06G1161400
n/a_697	Chr06:3046021|3052214	125.063	0	0	0	0	6193	n/a
MD06G1025900_1	Chr06:3126440|3127823	123.86	0	0	0	0	745	MD06G1025900
MD06G1198000_1	Chr06:33187792|33188014	415.655	0	0	0	0	222	MD06G1198000
n/a_747	Chr06:34040857|34043828	516.294	0	0	0	0	2971	n/a
MD06G1212000_1	Chr06:34464059|34464237	638.331	0	0	0	0	178	MD06G1212000
MD06G1220700_1	Chr06:35254558|35255584	928.946	0	0	0	0	149	MD06G1220700
MD06G1231600_1	Chr06:36268223|36268508	323.773	0	0	0	0	285	MD06G1231600
MD06G1234800_1	Chr06:36583570|36583983	670.281	0	0	0	0	413	MD06G1234800
MD06G1239700_1	Chr06:36991910|36992071	601.334	0	0	0	0	161	MD06G1239700
n/a_687	Chr06:379010|408463	140.984	0	0	0	0	29453	n/a
MD06G1035500_1	Chr06:4583936|4584237	377.485	0	0	0	0	301	MD06G1035500
MD06G1037400_2	Chr06:4764238|4764669	425.232	0	0	0	0	217	MD06G1037400
MD06G1037600_1	Chr06:4827946|4828096	615.169	0	0	0	0	150	MD06G1037600
MD06G1042600_1	Chr06:5583469|5583667	573.853	0	0	0	0	198	MD06G1042600
MD06G1043800_1	Chr06:5854294|5855376	363.965	0	0	0	0	399	MD06G1043800
MD06G1043800_2	Chr06:5854711|5854920	662.263	0	0	0	0	209	MD06G1043800
n/a_709	Chr06:8385851|8423554	238.077	0	0	0	0	37703	n/a
MD07G1108300_1	Chr07:12423728|12425089	101.699	0	0	0	0	1361	MD07G1108300
MD07G1112300_1	Chr07:13047933|13048122	768.371	0	0	0	0	189	MD07G1112300
MD07G1018100_1	Chr07:1563557|1563852	328.186	0	0	0	0	295	MD07G1018100
MD07G1018200_1	Chr07:1565857|1567784	485.66	0	0	0	0	190	MD07G1018200
Apple_newGene_41134_1	Chr07:1583230|1583380	615.169	0	0	0	0	150	Apple_newGene_41134
n/a_759	Chr07:1704075|1708495	31.3152	0	0	0	0	4420	n/a
MD07G1124600_1	Chr07:17457492|17457645	742.633	0	0	0	0	153	MD07G1124600
MD07G1131500_1	Chr07:18856248|18856430	797.924	0	0	0	0	182	MD07G1131500
MD07G1024900_1	Chr07:2089702|2090840	135.5	0	0	0	0	681	MD07G1024900
MD07G1157500_1	Chr07:22905722|22906428	287.462	0	0	0	0	321	MD07G1157500
MD07G1159400_2	Chr07:23334753|23334912	580.348	0	0	0	0	159	MD07G1159400
n/a_811	Chr07:23532741|23532944	454.558	0	0	0	0	203	n/a
MD07G1168200_1	Chr07:24277053|24277207	1106.72	0	0	0	0	154	MD07G1168200
n/a_765	Chr07:2443337|2481759	6.00407	0	0	0	0	38422	n/a
MD07G1171600_1	Chr07:24779620|24780181	198.869	0	0	0	0	464	MD07G1171600
MD07G1173400_1	Chr07:25121090|25121590	184.551	0	0	0	0	500	MD07G1173400
MD07G1173600_1	Chr07:25143978|25144688	438.698	0	0	0	0	259	MD07G1173600
MD07G1174700_2	Chr07:25312356|25312521	688.624	0	0	0	0	165	MD07G1174700
MD07G1031200_1	Chr07:2565974|2567048	90.1441	0	0	0	0	1074	MD07G1031200
MD07G1180700_1	Chr07:25992910|25993073	566.106	0	0	0	0	163	MD07G1180700
MD07G1184900_1	Chr07:26612075|26612333	357.656	0	0	0	0	258	MD07G1184900
MD07G1192100_1	Chr07:27189918|27190080	701.376	0	0	0	0	162	MD07G1192100
MD07G1034400_1	Chr07:2819230|2819572	332.231	0	0	0	0	342	MD07G1034400
MD07G1034400_2	Chr07:2819410|2819572	1948.5	0	0	0	0	162	MD07G1034400
MD07G1210800_1	Chr07:28970119|28970275	728.352	0	0	0	0	156	MD07G1210800
n/a_774	Chr07:2900025|2998060	1.48133	0	0	0	0	98035	n/a
n/a_818	Chr07:29035456|29035667	655.986	0	0	0	0	211	n/a
MD07G1215800_1	Chr07:29300380|29301428	132.073	0	0	0	0	1048	MD07G1215800
MD07G1223900_1	Chr07:30075092|30075379	337.334	0	0	0	0	287	MD07G1223900
MD07G1223900_3	Chr07:30075092|30076631	108.944	0	0	0	0	847	MD07G1223900
MD07G1036600_1	Chr07:3020101|3021368	172.155	0	0	0	0	536	MD07G1036600
MD07G1036600_2	Chr07:3021368|3021850	235.732	0	0	0	0	482	MD07G1036600
MD07G1234300_1	Chr07:30768656|30769696	181.641	0	0	0	0	533	MD07G1234300
n/a_821	Chr07:31110027|31131047	62.6662	0	0	0	0	21020	n/a
MD07G1245600_1	Chr07:31555375|31555585	541.061	0	0	0	0	210	MD07G1245600
MD07G1249100_1	Chr07:31804289|31805979	116.224	0	0	0	0	833	MD07G1249100
n/a_832	Chr07:31926743|31937129	168.807	0	0	0	0	10386	n/a
MD07G1253900_1	Chr07:32106029|32106923	579.709	0	0	0	0	196	MD07G1253900
MD07G1254500_1	Chr07:32184868|32185283	222.35	0	0	0	0	415	MD07G1254500
MD07G1261100_1	Chr07:32681276|32681486	461.023	0	0	0	0	210	MD07G1261100
MD07G1267300_1	Chr07:33533979|33534177	573.853	0	0	0	0	198	MD07G1267300
MD07G1039700_2	Chr07:3375498|3375687	512.247	0	0	0	0	189	MD07G1039700
n/a_839	Chr07:33808340|33819372	13.1637	0	0	0	0	11032	n/a
MD07G1280100_1	Chr07:34413292|34413753	559.623	0	0	0	0	173	MD07G1280100
MD07G1286600_1	Chr07:34843608|34844415	273.004	0	0	0	0	338	MD07G1286600
MD07G1289200_1	Chr07:35003091|35004657	58.9242	0	0	0	0	1566	MD07G1289200
MD07G1303900_1	Chr07:36135172|36135453	486.506	0	0	0	0	199	MD07G1303900
MD07G1305600_1	Chr07:36251718|36253050	86.2876	0	0	0	0	1122	MD07G1305600
MD07G1306200_1	Chr07:36280152|36280338	520.509	0	0	0	0	186	MD07G1306200
MD07G1309400_1	Chr07:36469645|36470968	119.23	0	0	0	0	812	MD07G1309400
n/a_779	Chr07:3877205|3887196	11.3725	0	0	0	0	9991	n/a
n/a_783	Chr07:4824513|4852092	5.26568	0	0	0	0	27579	n/a
MD07G1053000_2	Chr07:4876304|4876454	645.432	0	0	0	0	150	MD07G1053000
n/a_784	Chr07:5192241|5276163	3.46088	0	0	0	0	83922	n/a
MD07G1059900_1	Chr07:5578735|5578970	411.978	0	0	0	0	235	MD07G1059900
MD07G1005900_1	Chr07:583040|584204	269.679	0	0	0	0	718	MD07G1005900
MD07G1006400_1	Chr07:608319|608511	478.111	0	0	0	0	193	MD07G1006400
MD07G1087300_2	Chr07:9108086|9111491	177.112	0	0	0	0	521	MD07G1087300
MD08G1114400_2	Chr08:10281175|10281344	546.008	0	0	0	0	169	MD08G1114400
MD08G1128400_1	Chr08:12045473|12045630	616.654	0	0	0	0	157	MD08G1128400
MD08G1130200_2	Chr08:12259995|12260146	1504.94	0	0	0	0	151	MD08G1130200
MD08G1133800_1	Chr08:12700133|12701876	324.637	0	0	0	0	350	MD08G1133800
MD08G1158500_1	Chr08:17762855|17763238	441.509	0	0	0	0	209	MD08G1158500
MD08G1159600_1	Chr08:18362368|18362614	461.882	0	0	0	0	246	MD08G1159600
MD08G1161700_1	Chr08:18904708|18905103	233.608	0	0	0	0	395	MD08G1161700
MD08G1162900_1	Chr08:19187633|19187810	521.33	0	0	0	0	177	MD08G1162900
MD08G1002100_2	Chr08:215020|215248	591.509	0	0	0	0	156	MD08G1002100
MD08G1188400_1	Chr08:23788840|23789895	369.101	0	0	0	0	250	MD08G1188400
MD08G1197800_3	Chr08:25643746|25644123	800.094	0	0	0	0	294	MD08G1197800
n/a_906	Chr08:26167641|26198114	7.45728	0	0	0	0	30473	n/a
MD08G1036300_1	Chr08:2672704|2673084	373.584	0	0	0	0	247	MD08G1036300
MD08G1208700_1	Chr08:27114616|27114814	860.779	0	0	0	0	198	MD08G1208700
MD08G1211500_1	Chr08:27512873|27517434	205.056	0	0	0	0	1125	MD08G1211500
MD08G1227800_1	Chr08:29409912|29413632	207.757	0	0	0	0	466	MD08G1227800
MD08G1229600_1	Chr08:29558623|29558833	461.023	0	0	0	0	210	MD08G1229600
n/a_927	Chr08:29561101|29577073	5.77732	0	0	0	0	15972	n/a
n/a_930	Chr08:29567457|29580760	10.4046	0	0	0	0	13303	n/a
n/a_943	Chr08:30056029|30081245	3.83942	0	0	0	0	25216	n/a
MD08G1242200_1	Chr08:30785118|30785400	402.918	0	0	0	0	282	MD08G1242200
MD08G1242400_1	Chr08:30811682|30811901	842.697	0	0	0	0	219	MD08G1242400
MD08G1243900_1	Chr08:30921897|30922236	384.185	0	0	0	0	252	MD08G1243900
MD08G1244600_1	Chr08:30960632|30960835	559.719	0	0	0	0	203	MD08G1244600
MD08G1247600_1	Chr08:31127308|31128870	120.236	0	0	0	0	945	MD08G1247600
MD08G1248200_1	Chr08:31227931|31228715	391.129	0	0	0	0	581	MD08G1248200
n/a_874	Chr08:3404238|3445356	2.24416	0	0	0	0	41118	n/a
MD08G1046600_1	Chr08:3524619|3524839	774.701	0	0	0	0	220	MD08G1046600
MD08G1052400_1	Chr08:4116742|4116894	1214.15	0	0	0	0	152	MD08G1052400
MD08G1076400_1	Chr08:6222596|6224020	570.775	0	0	0	0	485	MD08G1076400
MD08G1084900_1	Chr08:7053314|7053995	164.371	0	0	0	0	589	MD08G1084900
MD08G1087700_2	Chr08:7253680|7253860	512.641	0	0	0	0	180	MD08G1087700
MD08G1089400_1	Chr08:7402765|7403797	138.137	0	0	0	0	668	MD08G1089400
MD08G1010400_1	Chr08:766585|766790	1108.52	0	0	0	0	205	MD08G1010400
MD08G1108900_1	Chr08:9582515|9583913	117.137	0	0	0	0	970	MD08G1108900
MD08G1108900_2	Chr08:9584661|9584811	615.169	0	0	0	0	150	MD08G1108900
MD08G1110400_2	Chr08:9707195|9708669	99.3633	0	0	0	0	1393	MD08G1110400
n/a_1026	Chr09:10154949|10172493	5.5184	0	0	0	0	17544	n/a
MD09G1139200_1	Chr09:10794285|10795560	369.706	0	0	0	0	461	MD09G1139200
MD09G1145500_1	Chr09:11319189|11319390	481.665	0	0	0	0	201	MD09G1145500
MD09G1019100_1	Chr09:1167486|1167653	552.547	0	0	0	0	167	MD09G1019100
n/a_951	Chr09:1274924|1282339	145.572	0	0	0	0	7415	n/a
n/a_1039	Chr09:13214830|13219024	5309.99	0	0	0	0	4194	n/a
MD09G1192900_1	Chr09:17205939|17206544	398.415	0	0	0	0	243	MD09G1192900
MD09G1193200_1	Chr09:17267908|17273147	72.3161	0	0	0	0	1276	MD09G1193200
MD09G1193900_1	Chr09:17371360|17371548	514.972	0	0	0	0	188	MD09G1193900
MD09G1196300_1	Chr09:17877512|17877684	1072.97	0	0	0	0	172	MD09G1196300
MD09G1202300_1	Chr09:18825159|18825437	995.777	0	0	0	0	278	MD09G1202300
MD09G1032000_1	Chr09:1924467|1927847	92.8292	0	0	0	0	1224	MD09G1032000
MD09G1032000_2	Chr09:1926752|1926908	591.509	0	0	0	0	156	MD09G1032000
MD09G1211800_1	Chr09:20708685|20709912	512.641	0	0	0	0	270	MD09G1211800
n/a_1049	Chr09:20862297|20893042	15.7009	0	0	0	0	30745	n/a
n/a_1057	Chr09:20895094|20961140	117.845	0	0	0	0	66046	n/a
MD09G1036200_1	Chr09:2237571|2237968	640.731	0	0	0	0	266	MD09G1036200
MD09G1230800_1	Chr09:28562005|28563142	85.1493	0	0	0	0	1137	MD09G1230800
MD09G1232600_1	Chr09:29017216|29017372	887.263	0	0	0	0	156	MD09G1232600
MD09G1243900_2	Chr09:31161367|31161636	517.726	0	0	0	0	187	MD09G1243900
MD09G1003000_1	Chr09:313757|313953	1176.98	0	0	0	0	196	MD09G1003000
MD09G1049000_1	Chr09:3228853|3229032	540.864	0	0	0	0	179	MD09G1049000
MD09G1049200_1	Chr09:3253236|3253371	717.146	0	0	0	0	135	MD09G1049200
Apple_newGene_52231_1	Chr09:33007721|33007877	591.509	0	0	0	0	156	Apple_newGene_52231
MD09G1267600_1	Chr09:34179761|34180375	177.794	0	0	0	0	519	MD09G1267600
n/a_1074	Chr09:35366071|35384063	18.8335	0	0	0	0	17992	n/a
n/a_1077	Chr09:35380749|35404820	4.72032	0	0	0	0	24071	n/a
MD09G1285000_1	Chr09:36305205|36305512	555.161	0	0	0	0	307	MD09G1285000
n/a_978	Chr09:3656978|3688774	221.557	0	0	0	0	31796	n/a
n/a_979	Chr09:3681010|3688774	236.924	0	0	0	0	7764	n/a
MD09G1291200_1	Chr09:37304052|37305204	146.246	0	0	0	0	662	MD09G1291200
MD09G1056500_1	Chr09:3735882|3736041	1071.91	0	0	0	0	159	MD09G1056500
n/a_982	Chr09:3762225|3762723	185.292	0	0	0	0	498	n/a
n/a_988	Chr09:5191681|5291345	53.4276	0	0	0	0	99664	n/a
n/a_989	Chr09:5192137|5227202	12.7097	0	0	0	0	35065	n/a
MD09G1075000_1	Chr09:5227391|5227598	1919.12	0	0	0	0	207	MD09G1075000
n/a_991	Chr09:5227531|5293453	2.58539	0	0	0	0	65922	n/a
MD09G1082900_1	Chr09:5805940|5808033	115.641	0	0	0	0	2093	MD09G1082900
MD09G1082900_2	Chr09:5807070|5807229	913.347	0	0	0	0	159	MD09G1082900
MD09G1087300_1	Chr09:6260010|6260162	955.409	0	0	0	0	152	MD09G1087300
n/a_1005	Chr09:6882057|6924706	2.27004	0	0	0	0	42649	n/a
MD09G1111400_1	Chr09:8470380|8470538	580.348	0	0	0	0	159	MD09G1111400
MD09G1112800_1	Chr09:8570342|8571174	1040.7	0	0	0	0	266	MD09G1112800
MD09G1116500_1	Chr09:8956689|8957179	583.479	0	0	0	0	490	MD09G1116500
n/a_1015	Chr09:9269965|9284435	503.784	0	0	0	0	14470	n/a
n/a_1016	Chr09:9332040|9350168	10.1804	0	0	0	0	18128	n/a
MD10G1077100_1	Chr10:10929356|10930654	253.156	0	0	0	0	729	MD10G1077100
MD10G1080000_1	Chr10:11729739|11729913	530.318	0	0	0	0	174	MD10G1080000
MD10G1080000_2	Chr10:11730515|11730712	576.766	0	0	0	0	197	MD10G1080000
MD10G1084900_1	Chr10:12481207|12481952	145.545	0	0	0	0	634	MD10G1084900
MD10G1087900_1	Chr10:13016770|13017130	256.32	0	0	0	0	360	MD10G1087900
MD10G1087900_2	Chr10:13016943|13017111	676.327	0	0	0	0	168	MD10G1087900
MD10G1097200_1	Chr10:15471414|15471583	859.302	0	0	0	0	169	MD10G1097200
n/a_1123	Chr10:16042764|16099844	5.08837	0	0	0	0	57080	n/a
MD10G1104300_1	Chr10:16996632|16997997	260.722	0	0	0	0	557	MD10G1104300
MD10G1012400_1	Chr10:1713740|1714500	465.668	0	0	0	0	488	MD10G1012400
MD10G1013700_1	Chr10:1851212|1851383	1132.34	0	0	0	0	171	MD10G1013700
MD10G1124100_1	Chr10:20161684|20161843	580.348	0	0	0	0	159	MD10G1124100
n/a_1134	Chr10:22162232|22237793	1.28128	0	0	0	0	75561	n/a
MD10G1139500_1	Chr10:22435919|22436104	498.786	0	0	0	0	185	MD10G1139500
Apple_newGene_55652_1	Chr10:25396450|25396827	602.774	0	0	0	0	377	Apple_newGene_55652
n/a_1094	Chr10:2699307|2699968	146.467	0	0	0	0	661	n/a
MD10G1021700_1	Chr10:2699349|2699508	1153.44	0	0	0	0	160	MD10G1021700
MD10G1021700_2	Chr10:2699379|2699599	514.131	0	0	0	0	221	MD10G1021700
MD10G1021700_3	Chr10:2699646|2699835	768.371	0	0	0	0	189	MD10G1021700
MD10G1183500_1	Chr10:27660553|27660792	405.083	0	0	0	0	239	MD10G1183500
MD10G1188400_1	Chr10:28334052|28334319	1032.93	0	0	0	0	268	MD10G1188400
MD10G1188400_2	Chr10:28337703|28338400	225.151	0	0	0	0	430	MD10G1188400
MD10G1189000_1	Chr10:28528532|28528707	973.91	0	0	0	0	175	MD10G1189000
MD10G1192900_1	Chr10:28909574|28909771	491.445	0	0	0	0	197	MD10G1192900
MD10G1197700_1	Chr10:29593774|29593943	672.325	0	0	0	0	169	MD10G1197700
MD10G1207100_1	Chr10:30666985|30667165	631.238	0	0	0	0	180	MD10G1207100
MD10G1218000_2	Chr10:31623656|31625098	123.198	0	0	0	0	749	MD10G1218000
MD10G1218500_1	Chr10:31647149|31647375	408.298	0	0	0	0	226	MD10G1218500
MD10G1218500_2	Chr10:31649716|31649914	699.056	0	0	0	0	198	MD10G1218500
MD10G1221000_1	Chr10:31919858|31920074	756.355	0	0	0	0	122	MD10G1221000
MD10G1242800_1	Chr10:33760444|33760791	363.965	0	0	0	0	266	MD10G1242800
MD10G1261000_1	Chr10:35525594|35525757	1611.72	0	0	0	0	163	MD10G1261000
MD10G1269300_1	Chr10:36183388|36183599	655.986	0	0	0	0	211	MD10G1269300
MD10G1028700_1	Chr10:3699371|3699534	566.106	0	0	0	0	163	MD10G1028700
MD10G1279600_1	Chr10:37065283|37065442	580.348	0	0	0	0	159	MD10G1279600
MD10G1280800_1	Chr10:37142876|37144568	66.0998	0	0	0	0	1396	MD10G1280800
MD10G1286100_1	Chr10:37556121|37556311	594.884	0	0	0	0	191	MD10G1286100
MD10G1288500_1	Chr10:37774805|37775096	634.195	0	0	0	0	291	MD10G1288500
MD10G1295300_2	Chr10:38288610|38289657	250.271	0	0	0	0	454	MD10G1295300
MD10G1314900_9	Chr10:39895700|39895928	607.075	0	0	0	0	228	MD10G1314900
MD10G1314900_11	Chr10:39895949|39896112	849.16	0	0	0	0	163	MD10G1314900
MD10G1321000_1	Chr10:40309812|40310148	884.225	0	0	0	0	257	MD10G1321000
MD10G1323000_1	Chr10:40437856|40438131	705.732	0	0	0	0	161	MD10G1323000
MD10G1323000_2	Chr10:40439548|40439867	303.494	0	0	0	0	319	MD10G1323000
MD10G1327000_1	Chr10:40689004|40690009	252.122	0	0	0	0	576	MD10G1327000
MD10G1332000_1	Chr10:40959411|40959635	507.245	0	0	0	0	224	MD10G1332000
n/a_1190	Chr10:41261552|41261747	496.486	0	0	0	0	195	n/a
MD10G1342200_1	Chr10:41712022|41712175	742.633	0	0	0	0	153	MD10G1342200
MD10G1342300_1	Chr10:41715400|41716061	600.286	0	0	0	0	343	MD10G1342300
MD10G1003000_1	Chr10:628456|631244	62.2603	0	0	0	0	1555	MD10G1003000
MD10G1052700_1	Chr10:7003836|7005966	183.709	0	0	0	0	527	MD10G1052700
MD10G1054700_1	Chr10:7481221|7481392	539.622	0	0	0	0	171	MD10G1054700
MD10G1064000_2	Chr10:8695314|8695469	624.611	0	0	0	0	155	MD10G1064000
MD10G1068000_1	Chr10:9379757|9381265	61.1905	0	0	0	0	1508	MD10G1068000
MD10G1006100_1	Chr10:944867|945059	1183.57	0	0	0	0	192	MD10G1006100
n/a_1112	Chr10:9837915|9874082	1286.49	0	0	0	0	36167	n/a
n/a_1113	Chr10:9838276|9874739	658.477	0	0	0	0	36463	n/a
MD11G1117100_2	Chr11:10603544|10603695	752.469	0	0	0	0	151	MD11G1117100
MD11G1118300_1	Chr11:10767115|10767355	403.395	0	0	0	0	240	MD11G1118300
MD11G1119700_1	Chr11:10894039|10894220	1014.01	0	0	0	0	182	MD11G1119700
MD11G1121300_1	Chr11:11184683|11185113	298.626	0	0	0	0	309	MD11G1121300
MD11G1125700_1	Chr11:11584325|11584484	608.898	0	0	0	0	159	MD11G1125700
n/a_1272	Chr11:11634744|11719550	1.3398	0	0	0	0	84806	n/a
MD11G1131000_1	Chr11:11851960|11852206	393.556	0	0	0	0	246	MD11G1131000
MD11G1131000_2	Chr11:11852279|11852618	458.157	0	0	0	0	248	MD11G1131000
MD11G1131800_1	Chr11:11934305|11934638	436.102	0	0	0	0	333	MD11G1131800
MD11G1134700_2	Chr11:12396983|12397350	843.334	0	0	0	0	287	MD11G1134700
MD11G1137000_1	Chr11:12644706|12644944	775.423	0	0	0	0	238	MD11G1137000
MD11G1144800_1	Chr11:13450940|13451112	562.876	0	0	0	0	172	MD11G1144800
MD11G1145200_1	Chr11:13502905|13503269	318.191	0	0	0	0	290	MD11G1145200
MD11G1145900_1	Chr11:13692715|13693781	274.629	0	0	0	0	336	MD11G1145900
n/a_1275	Chr11:14274811|14303343	92.1719	0	0	0	0	28532	n/a
MD11G1150900_1	Chr11:14326030|14326204	530.318	0	0	0	0	174	MD11G1150900
MD11G1151500_1	Chr11:14410930|14411624	607.609	0	0	0	0	374	MD11G1151500
MD11G1151700_1	Chr11:14452616|14453703	190.258	0	0	0	0	485	MD11G1151700
MD11G1156300_1	Chr11:15034706|15034895	512.247	0	0	0	0	189	MD11G1156300
n/a_1204	Chr11:1681609|1737768	30.2136	0	0	0	0	56159	n/a
n/a_1207	Chr11:1823162|1833933	10.549	0	0	0	0	10771	n/a
MD11G1023100_1	Chr11:2018422|2019564	120.464	0	0	0	0	766	MD11G1023100
MD11G1179000_1	Chr11:21512186|21513376	114.344	0	0	0	0	807	MD11G1179000
MD11G1181200_1	Chr11:22246238|22248277	546.264	0	0	0	0	312	MD11G1181200
MD11G1181200_2	Chr11:22248049|22249316	111.175	0	0	0	0	830	MD11G1181200
MD11G1002700_1	Chr11:239057|239552	605.092	0	0	0	0	320	MD11G1002700
MD11G1028500_1	Chr11:2498746|2500530	200.306	0	0	0	0	725	MD11G1028500
MD11G1029400_1	Chr11:2579710|2579912	562.49	0	0	0	0	202	MD11G1029400
MD11G1189700_1	Chr11:26765022|26765189	828.82	0	0	0	0	167	MD11G1189700
MD11G1191800_1	Chr11:27236802|27237150	278.203	0	0	0	0	348	MD11G1191800
MD11G1204800_1	Chr11:29885447|29885611	692.822	0	0	0	0	164	MD11G1204800
MD11G1212700_1	Chr11:31051626|31051834	819.396	0	0	0	0	208	MD11G1212700
n/a_1280	Chr11:31791852|31811729	4.87069	0	0	0	0	19877	n/a
MD11G1224500_1	Chr11:32858455|32859009	166.562	0	0	0	0	554	MD11G1224500
MD11G1226300_4	Chr11:33018129|33018357	404.716	0	0	0	0	228	MD11G1226300
MD11G1235000_1	Chr11:34208098|34210191	57.3495	0	0	0	0	1609	MD11G1235000
MD11G1237500_2	Chr11:34539562|34540057	293.599	0	0	0	0	387	MD11G1237500
MD11G1243000_1	Chr11:35317088|35319006	143.508	0	0	0	0	643	MD11G1243000
n/a_1286	Chr11:35358868|35387941	20.6305	0	0	0	0	29073	n/a
MD11G1251000_3	Chr11:36311916|36318366	192.799	0	0	0	0	884	MD11G1251000
MD11G1260600_1	Chr11:37473609|37474026	442.568	0	0	0	0	417	MD11G1260600
n/a_1294	Chr11:38348100|38446755	0.935334	0	0	0	0	98655	n/a
MD11G1273800_1	Chr11:39028898|39029067	672.325	0	0	0	0	169	MD11G1273800
MD11G1283600_1	Chr11:40172702|40172880	518.401	0	0	0	0	178	MD11G1283600
MD11G1286000_2	Chr11:40540437|40540648	538.497	0	0	0	0	211	MD11G1286000
MD11G1286500_1	Chr11:40621907|40622199	316.011	0	0	0	0	292	MD11G1286500
MD11G1046800_1	Chr11:4069865|4072099	58.9974	0	0	0	0	1641	MD11G1046800
n/a_1305	Chr11:40888034|40889125	104.146	0	0	0	0	1091	n/a
MD11G1289700_1	Chr11:40926493|40926664	849.252	0	0	0	0	171	MD11G1289700
MD11G1296400_1	Chr11:41409617|41410388	172.883	0	0	0	0	560	MD11G1296400
n/a_1322	Chr11:42372632|42440407	31.9842	0	0	0	0	67775	n/a
MD11G1051500_1	Chr11:4405006|4405249	379.734	0	0	0	0	243	MD11G1051500
MD11G1065500_1	Chr11:5637949|5640335	132.453	0	0	0	0	1045	MD11G1065500
MD11G1075100_1	Chr11:6358223|6358381	1225.5	0	0	0	0	158	MD11G1075100
n/a_1240	Chr11:6662819|6705282	2.67581	0	0	0	0	42463	n/a
MD11G1000400_1	Chr11:72209|72398	1089.41	0	0	0	0	189	MD11G1000400
MD11G1094700_2	Chr11:7913976|7914587	237.212	0	0	0	0	389	MD11G1094700
MD11G1103200_1	Chr11:8715880|8718348	115.47	0	0	0	0	984	MD11G1103200
n/a_1333	Chr12:1007202|1007638	708.365	0	0	0	0	436	n/a
MD12G1085500_1	Chr12:10484010|10484211	459.081	0	0	0	0	201	MD12G1085500
MD12G1087900_1	Chr12:10815753|10815929	550.084	0	0	0	0	176	MD12G1087900
MD12G1095800_2	Chr12:13257556|13260964	110.114	0	0	0	0	838	MD12G1095800
n/a_1336	Chr12:1492847|1513826	4.61484	0	0	0	0	20979	n/a
n/a_1337	Chr12:1568192|1569374	78.0671	0	0	0	0	1182	n/a
MD12G1101900_1	Chr12:16002211|16002481	823.887	0	0	0	0	112	MD12G1101900
MD12G1108600_1	Chr12:17163518|17163811	969.479	0	0	0	0	293	MD12G1108600
MD12G1109200_1	Chr12:17294622|17295341	1085.59	0	0	0	0	170	MD12G1109200
n/a_1357	Chr12:19329282|19363590	3.31185	0	0	0	0	34308	n/a
MD12G1131200_1	Chr12:20645669|20645936	345.601	0	0	0	0	267	MD12G1131200
MD12G1131200_2	Chr12:20645786|20645936	615.169	0	0	0	0	150	MD12G1131200
MD12G1143300_1	Chr12:22253740|22255402	364.76	0	0	0	0	623	MD12G1143300
n/a_1387	Chr12:26023957|26037465	10.7508	0	0	0	0	13508	n/a
n/a_1392	Chr12:27466876|27476920	83.2451	0	0	0	0	10044	n/a
n/a_1396	Chr12:28480657|28483417	33.4331	0	0	0	0	2760	n/a
MD12G1206700_1	Chr12:28707903|28708272	413.738	0	0	0	0	234	MD12G1206700
MD12G1209300_1	Chr12:28831592|28831817	1262.48	0	0	0	0	225	MD12G1209300
MD12G1230200_2	Chr12:30515776|30516635	300.59	0	0	0	0	378	MD12G1230200
MD12G1027900_1	Chr12:3112567|3112764	702.604	0	0	0	0	197	MD12G1027900
MD12G1246200_1	Chr12:31642747|31642899	910.612	0	0	0	0	152	MD12G1246200
MD12G1261600_1	Chr12:32833739|32835818	119.528	0	0	0	0	1158	MD12G1261600
MD12G1035600_1	Chr12:3874724|3875416	161.358	0	0	0	0	600	MD12G1035600
n/a_1341	Chr12:4271835|4293087	8.01968	0	0	0	0	21252	n/a
MD12G1039700_1	Chr12:4306251|4306454	454.558	0	0	0	0	203	MD12G1039700
MD12G1044100_1	Chr12:4952082|4952254	562.876	0	0	0	0	172	MD12G1044100
MD12G1045200_1	Chr12:5051356|5051532	524.292	0	0	0	0	176	MD12G1045200
MD12G1047000_1	Chr12:5414688|5414861	985.17	0	0	0	0	173	MD12G1047000
MD12G1049400_1	Chr12:5636074|5636226	607.075	0	0	0	0	152	MD12G1049400
MD12G1004700_1	Chr12:608889|609060	566.168	0	0	0	0	171	MD12G1004700
MD12G1057600_2	Chr12:6581537|6581697	1153.44	0	0	0	0	160	MD12G1057600
n/a_1347	Chr12:7150715|7206781	12.1595	0	0	0	0	56066	n/a
MD12G1065100_1	Chr12:7637136|7637764	154.164	0	0	0	0	628	MD12G1065100
MD12G1066700_2	Chr12:7910086|7910237	1222.19	0	0	0	0	151	MD12G1066700
MD13G1134600_1	Chr13:10360609|10361976	665.759	0	0	0	0	256	MD13G1134600
MD13G1138500_1	Chr13:10675550|10675944	386.472	0	0	0	0	294	MD13G1138500
MD13G1162100_1	Chr13:12758360|12760097	139.389	0	0	0	0	993	MD13G1162100
n/a_1477	Chr13:14659346|14659575	422.772	0	0	0	0	229	n/a
MD13G1183800_1	Chr13:15484423|15485396	280.472	0	0	0	0	658	MD13G1183800
MD13G1196500_2	Chr13:17075637|17075898	435.337	0	0	0	0	261	MD13G1196500
MD13G1024000_1	Chr13:1708747|1709192	1265.99	0	0	0	0	359	MD13G1024000
MD13G1200600_3	Chr13:17843252|17843422	569.498	0	0	0	0	170	MD13G1200600
MD13G1003100_1	Chr13:182441|182642	459.081	0	0	0	0	201	MD13G1003100
n/a_1480	Chr13:18659686|18721474	383.703	0	0	0	0	61788	n/a
MD13G1208100_3	Chr13:19099007|19099199	504.243	0	0	0	0	192	MD13G1208100
MD13G1217600_1	Chr13:20870799|20870979	631.238	0	0	0	0	180	MD13G1217600
MD13G1029500_1	Chr13:2123724|2123885	597.622	0	0	0	0	162	MD13G1029500
MD13G1030100_1	Chr13:2169015|2169452	282.259	0	0	0	0	343	MD13G1030100
MD13G1237200_1	Chr13:24136571|24136775	556.975	0	0	0	0	204	MD13G1237200
n/a_1487	Chr13:25379852|25380052	484.074	0	0	0	0	200	n/a
n/a_1488	Chr13:26516042|26527346	8.16307	0	0	0	0	11304	n/a
n/a_1454	Chr13:3016110|3032783	127.292	0	0	0	0	16673	n/a
n/a_1455	Chr13:3016933|3034523	13.1147	0	0	0	0	17590	n/a
MD13G1045700_1	Chr13:3161142|3161839	199.338	0	0	0	0	570	MD13G1045700
n/a_1491	Chr13:38515691|38515915	432.209	0	0	0	0	224	n/a
MD13G1064400_1	Chr13:4447652|4447877	410.113	0	0	0	0	225	MD13G1064400
MD13G1007000_1	Chr13:449663|450043	299.008	0	0	0	0	380	MD13G1007000
MD13G1065700_2	Chr13:4547354|4547666	310.304	0	0	0	0	312	MD13G1065700
MD13G1074600_1	Chr13:5270410|5270902	392.758	0	0	0	0	493	MD13G1074600
n/a_1458	Chr13:5828320|5838646	9.37582	0	0	0	0	10326	n/a
MD13G1089000_2	Chr13:6234589|6234778	901.769	0	0	0	0	189	MD13G1089000
MD13G1089500_1	Chr13:6275813|6276670	480.435	0	0	0	0	473	MD13G1089500
MD13G1095100_1	Chr13:6696687|6696894	548.903	0	0	0	0	207	MD13G1095100
n/a_1450	Chr13:700167|703042	12735.8	0	0	0	0	2875	n/a
MD13G1102800_1	Chr13:7339149|7339553	301.553	0	0	0	0	306	MD13G1102800
MD13G1105900_1	Chr13:7605342|7606250	317.382	0	0	0	0	358	MD13G1105900
n/a_1467	Chr13:7650586|7650760	653.005	0	0	0	0	174	n/a
MD14G1087500_3	Chr14:10913596|10914030	347.471	0	0	0	0	327	MD14G1087500
MD14G1094100_1	Chr14:14036818|14036998	946.857	0	0	0	0	180	MD14G1094100
MD14G1103700_1	Chr14:15999719|16000114	327.077	0	0	0	0	296	MD14G1103700
n/a_1505	Chr14:1674796|1703770	10.0243	0	0	0	0	28974	n/a
MD14G1127700_1	Chr14:20333776|20334041	348.209	0	0	0	0	265	MD14G1127700
MD14G1134100_1	Chr14:21239664|21239919	361.864	0	0	0	0	255	MD14G1134100
MD14G1134300_1	Chr14:21284205|21284405	484.074	0	0	0	0	200	MD14G1134300
MD14G1153400_1	Chr14:24746129|24746662	328.39	0	0	0	0	346	MD14G1153400
MD14G1157800_1	Chr14:25193197|25193391	585.685	0	0	0	0	194	MD14G1157800
MD14G1028500_1	Chr14:2529291|2529455	562.655	0	0	0	0	164	MD14G1028500
n/a_1545	Chr14:27856915|27892471	11.1846	0	0	0	0	35556	n/a
MD14G1191600_4	Chr14:28259631|28263888	36.2718	0	0	0	0	3816	MD14G1191600
MD14G1196600_1	Chr14:28694556|28694719	697.073	0	0	0	0	163	MD14G1196600
MD14G1201800_1	Chr14:29080358|29081046	265.474	0	0	0	0	428	MD14G1201800
n/a_1548	Chr14:29237926|29241205	29.5257	0	0	0	0	3279	n/a
n/a_1515	Chr14:2943088|2947923	190.225	0	0	0	0	4835	n/a
MD14G1212000_1	Chr14:29706506|29706677	664.461	0	0	0	0	171	MD14G1212000
MD14G1213100_1	Chr14:29764256|29765154	523.608	0	0	0	0	217	MD14G1213100
MD14G1214800_2	Chr14:29859580|29859847	345.601	0	0	0	0	267	MD14G1214800
MD14G1236000_1	Chr14:31592443|31593066	230.511	0	0	0	0	420	MD14G1236000
MD14G1237000_1	Chr14:31678742|31678940	488.963	0	0	0	0	198	MD14G1237000
MD14G1239300_1	Chr14:31832502|31833029	212.127	0	0	0	0	435	MD14G1239300
MD14G1242400_1	Chr14:32100834|32101229	1072.97	0	0	0	0	301	MD14G1242400
n/a_1555	Chr14:32128555|32150747	13.4361	0	0	0	0	22192	n/a
MD14G1245900_1	Chr14:32368274|32370168	132.623	0	0	0	0	730	MD14G1245900
MD14G1044400_1	Chr14:4190740|4190911	566.168	0	0	0	0	171	MD14G1044400
MD14G1048000_1	Chr14:4594120|4594331	437.324	0	0	0	0	211	MD14G1048000
MD14G1005800_1	Chr14:636544|636978	334.613	0	0	0	0	434	MD14G1005800
MD14G1007200_1	Chr14:759922|762654	221.524	0	0	0	0	2733	MD14G1007200
n/a_1522	Chr14:7802650|7808245	17.3038	0	0	0	0	5595	n/a
MD14G1077300_1	Chr14:8779349|8781168	254.202	0	0	0	0	363	MD14G1077300
n/a_1496	Chr14:887270|918986	7.63138	0	0	0	0	31716	n/a
MD14G1078100_1	Chr14:8925911|8926616	215.597	0	0	0	0	428	MD14G1078100
MD14G1081800_1	Chr14:9418346|9418841	186.415	0	0	0	0	495	MD14G1081800
MD14G1082300_1	Chr14:9492065|9492724	166.262	0	0	0	0	555	MD14G1082300
MD15G1143600_1	Chr15:10599247|10599904	223.591	0	0	0	0	433	MD15G1143600
MD15G1146400_1	Chr15:10885468|10886311	201.278	0	0	0	0	481	MD15G1146400
MD15G1148300_1	Chr15:10977064|10977273	441.509	0	0	0	0	209	MD15G1148300
n/a_1597	Chr15:11137477|11140474	129.216	0	0	0	0	2997	n/a
MD15G1154900_1	Chr15:11493600|11493757	723.713	0	0	0	0	157	MD15G1154900
n/a_1561	Chr15:1212106|1213312	5049.89	0	0	0	0	1206	n/a
MD15G1162300_1	Chr15:12228762|12228912	757.486	0	0	0	0	150	MD15G1162300
n/a_1562	Chr15:1254294|1254487	478.111	0	0	0	0	193	n/a
MD15G1181200_2	Chr15:14385604|14389231	58.8491	0	0	0	0	2352	MD15G1181200
MD15G1184000_1	Chr15:14530981|14531861	372.127	0	0	0	0	458	MD15G1184000
MD15G1200700_1	Chr15:15961814|15962116	320.579	0	0	0	0	302	MD15G1200700
MD15G1205400_1	Chr15:16328202|16328535	682.42	0	0	0	0	333	MD15G1205400
MD15G1207500_2	Chr15:16493720|16493882	701.376	0	0	0	0	162	MD15G1207500
MD15G1217600_1	Chr15:17533768|17534023	586.756	0	0	0	0	165	MD15G1217600
n/a_1605	Chr15:18008859|18009078	1326.23	0	0	0	0	219	n/a
MD15G1224200_1	Chr15:18230590|18230771	509.809	0	0	0	0	181	MD15G1224200
MD15G1224400_1	Chr15:18249907|18252076	201.418	0	0	0	0	721	MD15G1224400
MD15G1225500_1	Chr15:18317017|18317725	461.902	0	0	0	0	524	MD15G1225500
MD15G1231000_2	Chr15:18909119|18909284	688.624	0	0	0	0	165	MD15G1231000
MD15G1032100_1	Chr15:1977319|1977809	289.117	0	0	0	0	393	MD15G1032100
MD15G1250100_1	Chr15:20909965|20910181	448.216	0	0	0	0	216	MD15G1250100
n/a_1610	Chr15:22882301|22882475	834.61	0	0	0	0	174	n/a
MD15G1267000_1	Chr15:22966075|22966294	518.826	0	0	0	0	219	MD15G1267000
MD15G1033000_1	Chr15:2312999|2313182	501.496	0	0	0	0	184	MD15G1033000
MD15G1003900_3	Chr15:240686|240966	659.11	0	0	0	0	280	MD15G1003900
MD15G1275900_1	Chr15:24227713|24230164	56.4517	0	0	0	0	1715	MD15G1275900
n/a_1612	Chr15:24512762|24569724	1.69964	0	0	0	0	56962	n/a
MD15G1038500_1	Chr15:2693534|2693756	436.102	0	0	0	0	222	MD15G1038500
MD15G1042300_1	Chr15:2953790|2956407	127.724	0	0	0	0	1137	MD15G1042300
MD15G1312300_1	Chr15:31489760|31491241	316.498	0	0	0	0	718	MD15G1312300
MD15G1327600_1	Chr15:35437728|35439625	130.478	0	0	0	0	742	MD15G1327600
MD15G1331800_2	Chr15:36799444|36799752	737.811	0	0	0	0	308	MD15G1331800
MD15G1006600_1	Chr15:368439|368646	668.662	0	0	0	0	207	MD15G1006600
MD15G1333300_1	Chr15:36976807|36977220	498.346	0	0	0	0	228	MD15G1333300
MD15G1054400_1	Chr15:3711747|3712060	309.312	0	0	0	0	313	MD15G1054400
MD15G1055400_1	Chr15:3744455|3745506	153.027	0	0	0	0	603	MD15G1055400
MD15G1343900_1	Chr15:40038944|40039133	601.179	0	0	0	0	189	MD15G1343900
n/a_1623	Chr15:41250316|41330614	1.41502	0	0	0	0	80298	n/a
MD15G1352300_1	Chr15:42087114|42087657	245.937	0	0	0	0	462	MD15G1352300
MD15G1359200_1	Chr15:43326453|43326786	382.885	0	0	0	0	241	MD15G1359200
MD15G1359300_1	Chr15:43340362|43340555	501.631	0	0	0	0	193	MD15G1359300
MD15G1373800_2	Chr15:45662723|45662996	504.243	0	0	0	0	192	MD15G1373800
MD15G1380800_1	Chr15:46850134|46850305	996.692	0	0	0	0	171	MD15G1380800
MD15G1382300_1	Chr15:47130387|47130682	328.186	0	0	0	0	295	MD15G1382300
MD15G1383700_1	Chr15:47252633|47252880	460.012	0	0	0	0	247	MD15G1383700
MD15G1385000_1	Chr15:47561411|47561636	430.288	0	0	0	0	225	MD15G1385000
MD15G1385000_2	Chr15:47561456|47561855	284.769	0	0	0	0	399	MD15G1385000
MD15G1385000_5	Chr15:47565383|47565989	187.497	0	0	0	0	606	MD15G1385000
MD15G1072600_2	Chr15:4950326|4950480	599.191	0	0	0	0	154	MD15G1072600
MD15G1073200_1	Chr15:4981414|4981611	468.403	0	0	0	0	197	MD15G1073200
MD15G1415800_1	Chr15:51710014|51710224	461.023	0	0	0	0	210	MD15G1415800
MD15G1421600_1	Chr15:52335438|52336435	114.77	0	0	0	0	804	MD15G1421600
n/a_1652	Chr15:52573158|52583224	19.236	0	0	0	0	10066	n/a
MD15G1434100_2	Chr15:53441527|53443282	216.013	0	0	0	0	526	MD15G1434100
MD15G1440800_1	Chr15:54059286|54061755	91.8546	0	0	0	0	1054	MD15G1440800
n/a_1669	Chr15:54078275|54082104	807.319	0	0	0	0	3829	n/a
MD15G1010100_1	Chr15:541516|542787	145.201	0	0	0	0	1271	MD15G1010100
n/a_1671	Chr15:54172792|54186991	61.3658	0	0	0	0	14199	n/a
n/a_1672	Chr15:54173222|54187230	902.173	0	0	0	0	14008	n/a
MD15G1442300_1	Chr15:54275120|54275274	1214.15	0	0	0	0	76	MD15G1442300
MD15G1443200_1	Chr15:54328674|54331891	120.938	0	0	0	0	763	MD15G1443200
MD15G1010700_1	Chr15:581738|584244	276.877	0	0	0	0	1049	MD15G1010700
MD15G1084500_1	Chr15:5841123|5841434	311.301	0	0	0	0	311	MD15G1084500
MD15G1086700_1	Chr15:6012927|6013264	286.434	0	0	0	0	338	MD15G1086700
MD15G1115600_1	Chr15:8135163|8135313	968.147	0	0	0	0	150	MD15G1115600
MD15G1120000_1	Chr15:8646338|8646639	377.485	0	0	0	0	301	MD15G1120000
MD15G1126400_1	Chr15:9190287|9190442	624.611	0	0	0	0	155	MD15G1126400
MD15G1126400_2	Chr15:9192189|9192965	996.036	0	0	0	0	243	MD15G1126400
MD15G1130800_1	Chr15:9443704|9443867	849.16	0	0	0	0	163	MD15G1130800
MD15G1132900_1	Chr15:9635942|9636817	1279.49	0	0	0	0	227	MD15G1132900
MD15G1133400_3	Chr15:9672471|9672666	473.207	0	0	0	0	195	MD15G1133400
MD15G1134900_1	Chr15:9826167|9826338	566.168	0	0	0	0	171	MD15G1134900
n/a_1589	Chr15:9847593|9878432	6.27872	0	0	0	0	30839	n/a
n/a_1590	Chr15:9847593|9879164	2.92279	0	0	0	0	31571	n/a
Apple_newGene_14994_1	Chr16:10035955|10036119	692.822	0	0	0	0	164	Apple_newGene_14994
MD16G1131900_1	Chr16:10058673|10059854	237.291	0	0	0	0	408	MD16G1131900
MD16G1137200_1	Chr16:10490943|10491121	815.854	0	0	0	0	178	MD16G1137200
MD16G1001800_1	Chr16:110155|110332	641.937	0	0	0	0	177	MD16G1001800
n/a_1707	Chr16:11267911|11350971	4.10388	0	0	0	0	83060	n/a
MD16G1001800_2	Chr16:118019|118200	627.751	0	0	0	0	181	MD16G1001800
MD16G1154200_1	Chr16:12240548|12241102	660.598	0	0	0	0	258	MD16G1154200
MD16G1156400_1	Chr16:12455683|12455865	936.452	0	0	0	0	182	MD16G1156400
MD16G1157000_1	Chr16:12571062|12575466	34.8472	0	0	0	0	2648	MD16G1157000
MD16G1018300_2	Chr16:1337118|1337837	1147.7	0	0	0	0	402	MD16G1018300
MD16G1165600_1	Chr16:13796700|13796976	913.347	0	0	0	0	159	MD16G1165600
MD16G1167200_2	Chr16:13933952|13935245	236.603	0	0	0	0	390	MD16G1167200
MD16G1172600_1	Chr16:14544296|14546210	398.211	0	0	0	0	428	MD16G1172600
MD16G1020800_1	Chr16:1494293|1494860	270.602	0	0	0	0	341	MD16G1020800
n/a_1721	Chr16:15372419|15379850	99.3875	0	0	0	0	7431	n/a
MD16G1184300_1	Chr16:15831708|15832015	370.107	0	0	0	0	307	MD16G1184300
MD16G1186300_1	Chr16:16079478|16080208	252.118	0	0	0	0	549	MD16G1186300
n/a_1727	Chr16:16354932|16355110	957.496	0	0	0	0	178	n/a
n/a_1728	Chr16:16554109|16600690	139.179	0	0	0	0	46581	n/a
MD16G1023000_1	Chr16:1676751|1677137	372.364	0	0	0	0	260	MD16G1023000
n/a_1729	Chr16:16787488|16812946	8.9263	0	0	0	0	25458	n/a
MD16G1203200_1	Chr16:18470991|18472990	359.048	0	0	0	0	257	MD16G1203200
n/a_1733	Chr16:18933432|18978159	42.2931	0	0	0	0	44727	n/a
n/a_1736	Chr16:19426565|19487929	1354.12	0	0	0	0	61364	n/a
n/a_1738	Chr16:19427656|19489135	4.09954	0	0	0	0	61479	n/a
n/a_1739	Chr16:19427701|19489181	68.1929	0	0	0	0	61480	n/a
MD16G1219000_1	Chr16:21760791|21761174	404.352	0	0	0	0	281	MD16G1219000
MD16G1219900_1	Chr16:21839648|21840979	409.698	0	0	0	0	416	MD16G1219900
MD16G1227200_1	Chr16:23058939|23059641	137.913	0	0	0	0	702	MD16G1227200
MD16G1232700_3	Chr16:23930705|23930913	665.447	0	0	0	0	208	MD16G1232700
MD16G1033600_1	Chr16:2427765|2428077	465.455	0	0	0	0	312	MD16G1033600
MD16G1037200_1	Chr16:2677155|2677717	531.949	0	0	0	0	364	MD16G1037200
MD16G1037700_1	Chr16:2705025|2705663	198.869	0	0	0	0	464	MD16G1037700
MD16G1251400_1	Chr16:28157636|28159296	388.233	0	0	0	0	439	MD16G1251400
MD16G1251600_2	Chr16:28179050|28181398	528.479	0	0	0	0	215	MD16G1251600
MD16G1265000_1	Chr16:33645040|33645241	481.665	0	0	0	0	201	MD16G1265000
MD16G1265900_1	Chr16:33881119|33882781	415.655	0	0	0	0	333	MD16G1265900
MD16G1276600_1	Chr16:37434563|37434719	1092.53	0	0	0	0	156	MD16G1276600
MD16G1054000_1	Chr16:3819306|3819961	309.312	0	0	0	0	313	MD16G1054000
MD16G1281800_1	Chr16:38420921|38421889	384.481	0	0	0	0	240	MD16G1281800
MD16G1060200_2	Chr16:4322590|4322939	396.599	0	0	0	0	349	MD16G1060200
n/a_1686	Chr16:4436918|4443973	169.106	0	0	0	0	7055	n/a
MD16G1062500_1	Chr16:4447860|4448149	393.159	0	0	0	0	289	MD16G1062500
MD16G1067200_1	Chr16:4738629|4738797	549.258	0	0	0	0	168	MD16G1067200
MD16G1067500_1	Chr16:4755128|4755912	467.612	0	0	0	0	296	MD16G1067500
MD16G1082000_1	Chr16:5755707|5755956	388.814	0	0	0	0	249	MD16G1082000
MD16G1082000_2	Chr16:5756510|5757055	362.602	0	0	0	0	267	MD16G1082000
MD16G1095100_1	Chr16:6580257|6581178	334.331	0	0	0	0	276	MD16G1095100
MD16G1097800_1	Chr16:6838904|6840056	368.905	0	0	0	0	462	MD16G1097800
MD16G1103100_3	Chr16:7224885|7226386	313.011	0	0	0	0	726	MD16G1103100
MD16G1106400_1	Chr16:7469541|7470670	105.217	0	0	0	0	877	MD16G1106400
MD16G1107500_1	Chr16:7526762|7526959	488.963	0	0	0	0	198	MD16G1107500
MD16G1119100_1	Chr16:8514142|8514464	286.569	0	0	0	0	322	MD16G1119100
MD16G1121200_1	Chr16:8714858|8715532	342.268	0	0	0	0	674	MD16G1121200
MD16G1128700_1	Chr16:9420966|9421376	236.133	0	0	0	0	410	MD16G1128700
MD16G1012900_1	Chr16:990351|990508	1512.72	0	0	0	0	157	MD16G1012900
n/a_1789	Chr17:10567524|10640110	3.13071	0	0	0	0	72586	n/a
n/a_1792	Chr17:10578343|10601216	18.551	0	0	0	0	22873	n/a
n/a_1801	Chr17:12187694|12187965	893.125	0	0	0	0	271	n/a
MD17G1144400_1	Chr17:13019637|13019808	664.461	0	0	0	0	171	MD17G1144400
MD17G1016300_2	Chr17:1315990|1317937	178.372	0	0	0	0	637	MD17G1016300
MD17G1152400_1	Chr17:14094768|14094935	579.729	0	0	0	0	167	MD17G1152400
MD17G1157100_1	Chr17:15122739|15122910	566.168	0	0	0	0	171	MD17G1157100
MD17G1027400_2	Chr17:1956366|1958576	159.46	0	0	0	0	2125	MD17G1027400
MD17G1027400_4	Chr17:1962204|1962404	568.114	0	0	0	0	200	MD17G1027400
MD17G1175400_1	Chr17:19648598|19648756	719.132	0	0	0	0	158	MD17G1175400
MD17G1027400_7	Chr17:1968249|1969933	865.698	0	0	0	0	1575	MD17G1027400
MD17G1027400_8	Chr17:1969762|1971895	580.555	0	0	0	0	2055	MD17G1027400
MD17G1027400_13	Chr17:1972540|1972721	627.751	0	0	0	0	181	MD17G1027400
MD17G1177400_1	Chr17:20236860|20238535	190.323	0	0	0	0	597	MD17G1177400
MD17G1187800_1	Chr17:22447274|22447486	535.957	0	0	0	0	212	MD17G1187800
MD17G1189400_1	Chr17:22569623|22569848	410.113	0	0	0	0	225	MD17G1189400
MD17G1189400_2	Chr17:22569697|22569866	572.868	0	0	0	0	169	MD17G1189400
MD17G1191800_1	Chr17:22863507|22863959	383.861	0	0	0	0	296	MD17G1191800
MD17G1031900_1	Chr17:2313196|2313492	311.741	0	0	0	0	296	MD17G1031900
n/a_1762	Chr17:2353796|2353947	752.469	0	0	0	0	151	n/a
MD17G1198500_2	Chr17:23903255|23907015	94.9335	0	0	0	0	972	MD17G1198500
MD17G1035500_1	Chr17:2543030|2544225	176.983	0	0	0	0	642	MD17G1035500
MD17G1035600_1	Chr17:2555707|2555999	1288.81	0	0	0	0	292	MD17G1035600
MD17G1035600_2	Chr17:2555707|2556760	190.389	0	0	0	0	727	MD17G1035600
MD17G1035600_3	Chr17:2556565|2556748	529.042	0	0	0	0	183	MD17G1035600
MD17G1213100_2	Chr17:26021758|26021922	590.334	0	0	0	0	164	MD17G1213100
MD17G1213700_2	Chr17:26073637|26073834	468.403	0	0	0	0	197	MD17G1213700
MD17G1216600_1	Chr17:26335368|26335530	569.601	0	0	0	0	162	MD17G1216600
MD17G1217100_1	Chr17:26397176|26399598	95.0095	0	0	0	0	1019	MD17G1217100
MD17G1219000_1	Chr17:26629376|26629676	378.743	0	0	0	0	300	MD17G1219000
n/a_1816	Chr17:28027763|28084020	2.01971	0	0	0	0	56257	n/a
MD17G1038800_1	Chr17:2816432|2816652	516.468	0	0	0	0	220	MD17G1038800
MD17G1039100_1	Chr17:2856519|2856716	576.766	0	0	0	0	197	MD17G1039100
MD17G1239600_1	Chr17:28898738|28898926	490.826	0	0	0	0	188	MD17G1239600
MD17G1245400_1	Chr17:29385508|29385696	490.826	0	0	0	0	188	MD17G1245400
MD17G1246800_1	Chr17:29518007|29518167	576.721	0	0	0	0	160	MD17G1246800
MD17G1042300_2	Chr17:3102318|3102481	593.955	0	0	0	0	163	MD17G1042300
MD17G1042600_1	Chr17:3113868|3114075	467.704	0	0	0	0	207	MD17G1042600
MD17G1259300_1	Chr17:32009224|32009548	298.811	0	0	0	0	324	MD17G1259300
MD17G1268700_1	Chr17:32837783|32838288	611.095	0	0	0	0	302	MD17G1268700
n/a_1845	Chr17:33675991|33709709	6.8417	0	0	0	0	33718	n/a
MD17G1276600_1	Chr17:33712835|33713014	634.765	0	0	0	0	179	MD17G1276600
MD17G1283800_1	Chr17:34281298|34281469	1645.41	0	0	0	0	171	MD17G1283800
MD17G1285900_1	Chr17:34502843|34503050	1241.21	0	0	0	0	78	MD17G1285900
MD17G1047500_1	Chr17:3458585|3458800	1502.16	0	0	0	0	215	MD17G1047500
MD17G1056200_1	Chr17:4438565|4439881	143.429	0	0	0	0	675	MD17G1056200
MD17G1006600_1	Chr17:447171|447322	1128.7	0	0	0	0	151	MD17G1006600
MD17G1068700_1	Chr17:5565477|5565795	357.305	0	0	0	0	318	MD17G1068700
n/a_1772	Chr17:5671511|5676189	114200	0	0	0	0	4678	n/a
n/a_1778	Chr17:6612335|6612537	456.809	0	0	0	0	202	n/a
n/a_1779	Chr17:7318433|7318754	301.604	0	0	0	0	321	n/a
MD17G1091300_1	Chr17:7618367|7618535	823.887	0	0	0	0	168	MD17G1091300
n/a_1780	Chr17:7657414|7657770	259.2	0	0	0	0	356	n/a
n/a_1782	Chr17:8456475|8471431	110.159	0	0	0	0	14956	n/a

## Sheet: Table S7-6
Table S7-6 Expression of circRNAs in fruit only
New_ID	circRNA_ID	Flower	Phloem	Leaf	Root	Fruit	geneLength	gene_id
MD00G1058900_2	Chr00:10722612|10722846	0	0	0	0	347.017	234	MD00G1058900
MD00G1061700_1	Chr00:11426737|11427329	0	0	0	0	2287.17	366	MD00G1061700
MD00G1063900_2	Chr00:11971998|11972293	0	0	0	0	207.708	295	MD00G1063900
MD00G1085900_1	Chr00:17355852|17358532	0	0	0	0	176.235	676	MD00G1085900
MD00G1088600_1	Chr00:18116261|18116525	0	0	0	0	386.802	154	MD00G1088600
MD00G1095300_1	Chr00:19918701|19918854	0	0	0	0	530.731	153	MD00G1095300
MD00G1102700_1	Chr00:21636678|21636945	0	0	0	0	780.847	267	MD00G1102700
MD00G1125400_1	Chr00:26717998|26718682	0	0	0	0	290.007	420	MD00G1125400
MD00G1129200_1	Chr00:27493216|27495066	0	0	0	0	157.98	514	MD00G1129200
MD00G1001400_1	Chr00:286887|289652	0	0	0	0	80.412	762	MD00G1001400
MD00G1001400_3	Chr00:290979|291252	0	0	0	0	224.447	273	MD00G1001400
MD00G1148100_6	Chr00:32478728|32482541	0	0	0	0	109.028	562	MD00G1148100
MD00G1148100_9	Chr00:32482420|32484962	0	0	0	0	165.862	859	MD00G1148100
MD00G1148300_1	Chr00:32535220|32535727	0	0	0	0	240.955	337	MD00G1148300
MD00G1157400_1	Chr00:34804571|34804792	0	0	0	0	277.258	221	MD00G1157400
MD00G1159300_1	Chr00:35185831|35186209	0	0	0	0	324.201	378	MD00G1159300
MD00G1161300_1	Chr00:35862373|35863995	0	0	0	0	119.676	512	MD00G1161300
MD00G1019700_1	Chr00:3617677|3622150	0	0	0	0	66.1792	1227	MD00G1019700
n/a_9	Chr00:3729762|3736072	0	0	0	0	19.4212	6310	n/a
MD00G1171900_2	Chr00:39530135|39530310	0	0	0	0	350.137	175	MD00G1171900
MD00G1034800_2	Chr00:6077902|6080456	0	0	0	0	170.235	477	MD00G1034800
n/a_18	Chr00:6748243|6748474	0	0	0	0	257.868	231	n/a
n/a_20	Chr00:6753456|6753629	0	0	0	0	469.375	173	n/a
n/a_21	Chr00:6754478|6754661	0	0	0	0	665.589	183	n/a
n/a_1	Chr00:814895|824208	0	0	0	0	200.672	9313	n/a
MD00G1050700_1	Chr00:9597093|9598994	0	0	0	0	277.942	545	MD00G1050700
MD00G1050700_2	Chr00:9597253|9598994	0	0	0	0	126.47	471	MD00G1050700
MD01G1031200_1	Chr01:10949504|10953188	0	0	0	0	156.577	587	MD01G1031200
MD01G1035600_1	Chr01:12019605|12019902	0	0	0	0	206.31	297	MD01G1035600
MD01G1036200_3	Chr01:12168815|12168977	0	0	0	0	378.234	162	MD01G1036200
MD01G1045900_1	Chr01:14675430|14675596	0	0	0	0	553.68	166	MD01G1045900
MD01G1046700_1	Chr01:14779835|14780273	0	0	0	0	235.368	345	MD01G1046700
MD01G1048800_1	Chr01:15174573|15174857	0	0	0	0	531.852	168	MD01G1048800
MD01G1066500_1	Chr01:17026173|17027454	0	0	0	0	66.1706	926	MD01G1066500
MD01G1066500_2	Chr01:17026882|17027454	0	0	0	0	964.809	474	MD01G1066500
MD01G1068300_1	Chr01:17224471|17224654	0	0	0	0	1000.42	183	MD01G1068300
MD01G1072500_1	Chr01:17776851|17777296	0	0	0	0	189.703	323	MD01G1072500
MD01G1073100_1	Chr01:17822103|17822310	0	0	0	0	287.766	207	MD01G1073100
MD01G1073600_1	Chr01:17915859|17916024	0	0	0	0	738.199	165	MD01G1073600
MD01G1073600_3	Chr01:17915979|17916167	0	0	0	0	325.925	188	MD01G1073600
MD01G1074300_1	Chr01:18037994|18038719	0	0	0	0	84.5158	725	MD01G1074300
n/a_59	Chr01:20986934|21022536	0	0	0	0	5.85602	35602	n/a
MD01G1102600_1	Chr01:21486385|21486665	0	0	0	0	290.007	280	MD01G1102600
MD01G1103100_1	Chr01:21509724|21511313	0	0	0	0	193.293	317	MD01G1103100
MD01G1103500_1	Chr01:21578656|21578821	0	0	0	0	361.015	165	MD01G1103500
MD01G1110100_1	Chr01:22284076|22284354	0	0	0	0	512.503	278	MD01G1110100
MD01G1110100_2	Chr01:22284113|22284306	0	0	0	0	317.482	193	MD01G1110100
MD01G1110100_3	Chr01:22284991|22285641	0	0	0	0	153.791	528	MD01G1110100
MD01G1124000_1	Chr01:23703788|23704310	0	0	0	0	176.075	522	MD01G1124000
MD01G1141200_1	Chr01:25025437|25026420	0	0	0	0	76.5649	778	MD01G1141200
n/a_69	Chr01:25523071|25523271	0	0	0	0	297.837	200	n/a
MD01G1147000_1	Chr01:25610683|25610964	0	0	0	0	866.924	281	MD01G1147000
MD01G1147200_2	Chr01:25634022|25634177	0	0	0	0	576.459	155	MD01G1147200
MD01G1147700_1	Chr01:25673935|25674257	0	0	0	0	252.18	322	MD01G1147700
MD01G1152100_1	Chr01:26079430|26079945	0	0	0	0	507.512	320	MD01G1152100
MD01G1153400_1	Chr01:26179250|26179453	0	0	0	0	301.842	203	MD01G1153400
n/a_78	Chr01:27264419|27264635	0	0	0	0	551.551	216	n/a
n/a_81	Chr01:27611226|27611419	0	0	0	0	317.482	193	n/a
n/a_86	Chr01:27863191|27921821	0	0	0	0	9.29313	58630	n/a
n/a_91	Chr01:27955214|27993150	0	0	0	0	62.0744	37936	n/a
MD01G1180600_1	Chr01:27992357|27992524	0	0	0	0	366.91	167	MD01G1180600
MD01G1186200_1	Chr01:28505692|28505891	0	0	0	0	408.05	199	MD01G1186200
n/a_94	Chr01:28802765|28882551	0	0	0	0	0.746591	79786	n/a
MD01G1206800_1	Chr01:30231769|30232286	0	0	0	0	118.518	517	MD01G1206800
MD01G1209500_1	Chr01:30358655|30359365	0	0	0	0	171.312	474	MD01G1209500
MD01G1210100_1	Chr01:30405593|30405856	0	0	0	0	232.981	263	MD01G1210100
MD01G1210300_1	Chr01:30419791|30420038	0	0	0	0	248.073	247	MD01G1210300
n/a_99	Chr01:30461086|30461248	0	0	0	0	2237.8	162	n/a
MD01G1212800_1	Chr01:30626225|30626392	0	0	0	0	535.037	167	MD01G1212800
n/a_104	Chr01:30991652|31009966	0	0	0	0	23.0475	18314	n/a
MD01G1229500_1	Chr01:31880451|31883118	0	0	0	0	24.635	2418	MD01G1229500
n/a_107	Chr01:32123478|32123727	0	0	0	0	326.112	249	n/a
n/a_112	Chr01:32468532|32479579	0	0	0	0	210.773	11047	n/a
MD01G1238900_1	Chr01:32527933|32528117	0	0	0	0	333.011	184	MD01G1238900
MD01G1012300_1	Chr01:6362600|6364684	0	0	0	0	109.903	813	MD01G1012300
n/a_29	Chr01:8338298|8339928	0	0	0	0	49.8171	1630	n/a
MD01G1021000_1	Chr01:8379149|8382045	0	0	0	0	369.525	403	MD01G1021000
MD01G1022700_1	Chr01:9005791|9007553	0	0	0	0	90.6199	986	MD01G1022700
MD02G1128300_1	Chr02:10373679|10374688	0	0	0	0	185.568	642	MD02G1128300
n/a_229	Chr02:10416127|10435182	0	0	0	0	212.574	19055	n/a
MD02G1134200_1	Chr02:10877628|10878166	0	0	0	0	181.284	338	MD02G1134200
MD02G1139900_1	Chr02:11658398|11658760	0	0	0	0	224.315	362	MD02G1139900
MD02G1139900_2	Chr02:11658467|11658663	0	0	0	0	303.916	196	MD02G1139900
MD02G1139900_3	Chr02:11658467|11658666	0	0	0	0	299.334	199	MD02G1139900
MD02G1139900_4	Chr02:11658573|11659721	0	0	0	0	156.311	392	MD02G1139900
MD02G1140000_1	Chr02:11665503|11665689	0	0	0	0	320.255	186	MD02G1140000
MD02G1140100_1	Chr02:11686002|11686166	0	0	0	0	363.216	164	MD02G1140100
MD02G1140100_4	Chr02:11686221|11686382	0	0	0	0	369.984	161	MD02G1140100
MD02G1140100_5	Chr02:11686258|11686540	0	0	0	0	860.057	282	MD02G1140100
MD02G1140100_6	Chr02:11686350|11686629	0	0	0	0	439.24	279	MD02G1140100
MD02G1140100_7	Chr02:11686399|11686678	0	0	0	0	433.123	279	MD02G1140100
n/a_239	Chr02:12203528|12210501	0	0	0	0	8.78732	6973	n/a
n/a_243	Chr02:12205065|12219229	0	0	0	0	53.4128	14164	n/a
MD02G1159300_1	Chr02:13362688|13367489	0	0	0	0	50.6246	1604	MD02G1159300
n/a_125	Chr02:1397322|1408565	0	0	0	0	7.22244	11243	n/a
n/a_249	Chr02:14043850|14083404	0	0	0	0	4.51794	39554	n/a
n/a_251	Chr02:14085829|14116224	0	0	0	0	95.8379	30395	n/a
MD02G1165300_1	Chr02:14114389|14115564	0	0	0	0	56.2488	1059	MD02G1165300
n/a_252	Chr02:14482522|14485134	0	0	0	0	23.4586	2612	n/a
n/a_254	Chr02:15871012|15871180	0	0	0	0	709.137	168	n/a
n/a_255	Chr02:15871204|15871419	0	0	0	0	277.058	215	n/a
MD02G1201700_1	Chr02:19952035|19954947	0	0	0	0	115.017	1059	MD02G1201700
MD02G1202100_1	Chr02:20023323|20025113	0	0	0	0	45.8637	1336	MD02G1202100
MD02G1205100_1	Chr02:20519086|20519258	0	0	0	0	534.366	172	MD02G1205100
MD02G1002900_1	Chr02:230065|231663	0	0	0	0	136.017	597	MD02G1002900
MD02G1214300_1	Chr02:23821559|23824089	0	0	0	0	84.3218	963	MD02G1214300
MD02G1221900_1	Chr02:25875389|25876782	0	0	0	0	84.2539	707	MD02G1221900
MD02G1223800_1	Chr02:26216060|26216706	0	0	0	0	610.64	647	MD02G1223800
n/a_140	Chr02:2694908|2707386	0	0	0	0	66.2926	12478	n/a
MD02G1260600_1	Chr02:31413929|31414220	0	0	0	0	279.044	291	MD02G1260600
MD02G1282000_2	Chr02:33794057|33794238	0	0	0	0	338.53	181	MD02G1282000
MD02G1283400_1	Chr02:33988661|33988820	0	0	0	0	385.371	159	MD02G1283400
n/a_298	Chr02:34296659|34311349	0	0	0	0	6.08245	14690	n/a
MD02G1042800_1	Chr02:3519491|3521799	0	0	0	0	56.6827	1081	MD02G1042800
MD02G1042800_2	Chr02:3521269|3522223	0	0	0	0	129.777	459	MD02G1042800
MD02G1300300_2	Chr02:35506570|35507485	0	0	0	0	177.49	915	MD02G1300300
MD02G1301900_1	Chr02:35623854|35624015	0	0	0	0	756.469	162	MD02G1301900
n/a_310	Chr02:35643532|35660206	0	0	0	0	394.759	16674	n/a
MD02G1302000_1	Chr02:35644610|35644795	0	0	0	0	662.421	185	MD02G1302000
MD02G1308700_2	Chr02:36394397|36395855	0	0	0	0	223.518	533	MD02G1308700
MD02G1315400_1	Chr02:37019699|37021133	0	0	0	0	256.019	359	MD02G1315400
MD02G1316000_1	Chr02:37065783|37066322	0	0	0	0	153.185	400	MD02G1316000
MD02G1319100_5	Chr02:37355898|37358850	0	0	0	0	178.703	1766	MD02G1319100
Apple_newGene_21821_2	Chr02:4224897|4292970	0	0	0	0	20.3636	7313	Apple_newGene_21821
MD02G1064300_2	Chr02:5193241|5194484	0	0	0	0	648.283	508	MD02G1064300
MD02G1064800_1	Chr02:5253565|5254509	0	0	0	0	134.965	454	MD02G1064800
MD02G1064900_1	Chr02:5260663|5261192	0	0	0	0	569.838	285	MD02G1064900
MD02G1067100_1	Chr02:5488364|5488558	0	0	0	0	460.573	194	MD02G1067100
MD02G1067200_1	Chr02:5503018|5503214	0	0	0	0	303.916	196	MD02G1067200
n/a_178	Chr02:5734164|5772834	0	0	0	0	2.09987	38670	n/a
Apple_newGene_21981_2	Chr02:5804250|5824412	0	0	0	0	28.606	3213	Apple_newGene_21981
MD02G1009500_1	Chr02:637071|637239	0	0	0	0	354.568	168	MD02G1009500
MD02G1088500_2	Chr02:6981953|6982138	0	0	0	0	321.986	185	MD02G1088500
MD02G1094300_1	Chr02:7487296|7487744	0	0	0	0	166.39	358	MD02G1094300
MD02G1097800_1	Chr02:7722009|7722267	0	0	0	0	237.496	258	MD02G1097800
n/a_196	Chr02:7725501|7727069	0	0	0	0	78.1556	1568	n/a
MD02G1012500_1	Chr02:783591|784074	0	0	0	0	231.222	265	MD02G1012500
MD02G1012700_1	Chr02:797266|797963	0	0	0	0	138.004	444	MD02G1012700
n/a_212	Chr02:8486132|8544082	0	0	0	0	100.221	57950	n/a
MD02G1105600_1	Chr02:8555516|8555828	0	0	0	0	291.781	210	MD02G1105600
n/a_122	Chr02:856855|857015	0	0	0	0	382.962	160	n/a
MD02G1115000_1	Chr02:9341736|9341982	0	0	0	0	242.144	246	MD02G1115000
n/a_124	Chr02:962365|989332	0	0	0	0	26.9182	26967	n/a
MD03G1118200_2	Chr03:10690167|10690339	0	0	0	0	708.156	172	MD03G1118200
MD03G1119200_1	Chr03:10903000|10911788	0	0	0	0	35.0122	2552	MD03G1119200
MD03G1121600_3	Chr03:11314192|11318393	0	0	0	0	35.6905	1669	MD03G1121600
MD03G1121600_4	Chr03:11326769|11328037	0	0	0	0	143.466	1132	MD03G1121600
MD03G1130200_1	Chr03:12811510|12811953	0	0	0	0	179.689	341	MD03G1130200
MD03G1134200_1	Chr03:13401259|13402324	0	0	0	0	81.4877	731	MD03G1134200
n/a_338	Chr03:1542643|1556423	0	0	0	0	18.4553	13780	n/a
MD03G1145900_1	Chr03:15929857|15930063	0	0	0	0	431.648	207	MD03G1145900
MD03G1148600_1	Chr03:16543703|16546174	0	0	0	0	142.848	417	MD03G1148600
MD03G1150700_1	Chr03:16847533|16847827	0	0	0	0	202.61	294	MD03G1150700
MD03G1157000_1	Chr03:18608671|18609350	0	0	0	0	150.804	395	MD03G1157000
MD03G1157000_2	Chr03:18612008|18616888	0	0	0	0	244.618	494	MD03G1157000
MD03G1161100_1	Chr03:19415701|19416948	0	0	0	0	95.2939	643	MD03G1161100
MD03G1025100_2	Chr03:2076492|2077366	0	0	0	0	569.01	764	MD03G1025100
MD03G1164800_1	Chr03:21721126|21721938	0	0	0	0	223.628	274	MD03G1164800
MD03G1027100_3	Chr03:2184544|2184754	0	0	0	0	386.676	210	MD03G1027100
MD03G1165200_1	Chr03:21860165|21864596	0	0	0	0	110.179	737	MD03G1165200
n/a_402	Chr03:22357590|22372963	0	0	0	0	5.28211	15373	n/a
MD03G1168800_3	Chr03:22819414|22821316	0	0	0	0	380.623	939	MD03G1168800
MD03G1172500_3	Chr03:23531925|23534825	0	0	0	0	105.243	566	MD03G1172500
MD03G1173300_1	Chr03:23681570|23684266	0	0	0	0	117.608	1042	MD03G1173300
MD03G1174600_1	Chr03:23870683|23871192	0	0	0	0	132.963	448	MD03G1174600
n/a_350	Chr03:2475441|2487984	0	0	0	0	4.88511	12543	n/a
n/a_421	Chr03:24882205|24927824	0	0	0	0	5.22304	45619	n/a
MD03G1031700_1	Chr03:2548832|2549394	0	0	0	0	717.68	249	MD03G1031700
Apple_newGene_27815_2	Chr03:25744209|25749687	0	0	0	0	22.2349	5478	Apple_newGene_27815
MD03G1199000_1	Chr03:27239326|27239479	0	0	0	0	389.33	153	MD03G1199000
n/a_426	Chr03:27601103|27612581	0	0	0	0	77.8456	11478	n/a
n/a_427	Chr03:27601489|27613328	0	0	0	0	89.165	11839	n/a
MD03G1208100_1	Chr03:28718416|28719288	0	0	0	0	131.014	682	MD03G1208100
MD03G1209000_1	Chr03:28814320|28816036	0	0	0	0	126.338	485	MD03G1209000
MD03G1210100_1	Chr03:28924703|28925192	0	0	0	0	409.687	489	MD03G1210100
MD03G1210100_2	Chr03:28924916|28925192	0	0	0	0	215.824	276	MD03G1210100
MD03G1210100_3	Chr03:28926056|28926299	0	0	0	0	367.7	243	MD03G1210100
MD03G1210100_4	Chr03:28926102|28926345	0	0	0	0	868.502	243	MD03G1210100
MD03G1210100_5	Chr03:28926195|28926345	0	0	0	0	3211.06	150	MD03G1210100
MD03G1036600_3	Chr03:2908140|2908422	0	0	0	0	217.284	282	MD03G1036600
MD03G1219400_1	Chr03:30406668|30407724	0	0	0	0	92.7842	642	MD03G1219400
MD03G1038300_1	Chr03:3041912|3045072	0	0	0	0	162.753	366	MD03G1038300
MD03G1222600_1	Chr03:30697837|30698015	0	0	0	0	684.285	178	MD03G1222600
MD03G1246200_1	Chr03:33324177|33325166	0	0	0	0	90.0242	902	MD03G1246200
n/a_443	Chr03:33899982|33904122	0	0	0	0	14.3883	4140	n/a
MD03G1043400_1	Chr03:3402666|3402846	0	0	0	0	340.411	180	MD03G1043400
MD03G1258300_1	Chr03:34540868|34541032	0	0	0	0	495.133	164	MD03G1258300
MD03G1272700_1	Chr03:35610454|35612682	0	0	0	0	65.7478	1359	MD03G1272700
MD03G1272700_2	Chr03:35611690|35612273	0	0	0	0	325.505	366	MD03G1272700
MD03G1285800_1	Chr03:36543626|36544911	0	0	0	0	135.381	440	MD03G1285800
n/a_460	Chr03:36633778|36637857	0	0	0	0	29.2069	4079	n/a
MD03G1292100_1	Chr03:36925728|36926042	0	0	0	0	284.558	314	MD03G1292100
n/a_469	Chr03:36931422|36931572	0	0	0	0	408.493	150	n/a
MD03G1292300_1	Chr03:36932135|36932306	0	0	0	0	472.104	172	MD03G1292300
MD03G1048900_1	Chr03:3934878|3935030	0	0	0	0	403.118	152	MD03G1048900
n/a_368	Chr03:4014583|4019573	0	0	0	0	11.9374	4990	n/a
MD03G1055800_1	Chr03:4435262|4435424	0	0	0	0	367.7	162	MD03G1055800
MD03G1000900_1	Chr03:45238|46394	0	0	0	0	134.161	444	MD03G1000900
MD03G1057400_1	Chr03:4580048|4580405	0	0	0	0	377.009	158	MD03G1057400
MD03G1057400_2	Chr03:4580373|4581317	0	0	0	0	77.3604	770	MD03G1057400
MD03G1083600_1	Chr03:6768854|6769740	0	0	0	0	156.511	783	MD03G1083600
MD03G1088100_1	Chr03:7280877|7281452	0	0	0	0	130.648	469	MD03G1088100
n/a_385	Chr03:7300861|7308846	0	0	0	0	111.268	7985	n/a
n/a_323	Chr03:759474|780117	0	0	0	0	2.8856	20643	n/a
MD03G1010400_1	Chr03:802840|803000	0	0	0	0	558.445	160	MD03G1010400
MD03G1001300_1	Chr03:86018|87805	0	0	0	0	181.254	448	MD03G1001300
MD03G1103600_1	Chr03:8869018|8869183	0	0	0	0	361.015	165	MD03G1103600
n/a_390	Chr03:9702681|9704249	0	0	0	0	192.668	1568	n/a
MD04G1009100_1	Chr04:1057353|1057741	0	0	0	0	212.757	288	MD04G1009100
n/a_475	Chr04:1102157|1106052	0	0	0	0	84.1132	3895	n/a
MD04G1081900_1	Chr04:11296953|11297789	0	0	0	0	102.294	599	MD04G1081900
n/a_511	Chr04:13542015|13542274	0	0	0	0	313.521	259	n/a
MD04G1012800_1	Chr04:1416864|1418250	0	0	0	0	83.973	967	MD04G1012800
MD04G1012800_2	Chr04:1427252|1430651	0	0	0	0	24.0095	2481	MD04G1012800
MD04G1012800_3	Chr04:1427252|1432979	0	0	0	0	19.3246	4202	MD04G1012800
MD04G1012800_6	Chr04:1434289|1436659	0	0	0	0	295.429	916	MD04G1012800
MD04G1013500_2	Chr04:1541678|1542683	0	0	0	0	147.105	828	MD04G1013500
MD04G1014200_1	Chr04:1595386|1595575	0	0	0	0	1121.16	189	MD04G1014200
n/a_472	Chr04:16110|38490	0	0	0	0	2.66164	22380	n/a
MD04G1094400_1	Chr04:17220599|17221032	0	0	0	0	255.654	233	MD04G1094400
MD04G1125600_5	Chr04:21213210|21213558	0	0	0	0	440.186	348	MD04G1125600
MD04G1125600_7	Chr04:21213222|21213410	0	0	0	0	475.272	188	MD04G1125600
MD04G1125600_8	Chr04:21213243|21213410	0	0	0	0	550.365	167	MD04G1125600
MD04G1137900_1	Chr04:22528643|22529071	0	0	0	0	275.775	324	MD04G1137900
MD04G1146600_1	Chr04:23501726|23503227	0	0	0	0	125.67	474	MD04G1146600
MD04G1148400_1	Chr04:23672669|23672826	0	0	0	0	775.814	157	MD04G1148400
MD04G1175700_1	Chr04:26679578|26679791	0	0	0	0	287.671	213	MD04G1175700
MD04G1023800_1	Chr04:2739888|2742436	0	0	0	0	123.869	742	MD04G1023800
n/a_527	Chr04:27427969|27447572	0	0	0	0	3.03869	19603	n/a
MD04G1187900_1	Chr04:27833200|27833550	0	0	0	0	170.193	350	MD04G1187900
MD04G1194100_2	Chr04:28354531|28355649	0	0	0	0	128.322	955	MD04G1194100
MD04G1194600_1	Chr04:28377688|28378005	0	0	0	0	354.593	229	MD04G1194600
MD04G1205000_1	Chr04:29112688|29115556	0	0	0	0	55.0148	1476	MD04G1205000
MD04G1002300_1	Chr04:291738|294101	0	0	0	0	157.598	972	MD04G1002300
MD04G1206500_1	Chr04:29225251|29225734	0	0	0	0	184.992	483	MD04G1206500
MD04G1208400_1	Chr04:29336157|29338251	0	0	0	0	141.603	631	MD04G1208400
MD04G1208800_1	Chr04:29408575|29408872	0	0	0	0	412.619	297	MD04G1208800
MD04G1225500_1	Chr04:30546620|30548470	0	0	0	0	112.78	720	MD04G1225500
n/a_551	Chr04:31574940|31600563	0	0	0	0	40.6834	25623	n/a
MD04G1031100_1	Chr04:3470907|3471838	0	0	0	0	63.9822	931	MD04G1031100
MD04G1031100_3	Chr04:3475091|3475313	0	0	0	0	731.548	222	MD04G1031100
MD04G1033500_1	Chr04:3780776|3781010	0	0	0	0	774.625	234	MD04G1033500
MD04G1033500_2	Chr04:3781838|3782041	0	0	0	0	603.684	203	MD04G1033500
n/a_494	Chr04:3781841|3782044	0	0	0	0	400.009	203	n/a
MD04G1038300_1	Chr04:4252171|4252436	0	0	0	0	273.544	224	MD04G1038300
MD04G1043700_1	Chr04:5142952|5145201	0	0	0	0	35.5006	1726	MD04G1043700
MD04G1045000_1	Chr04:5244045|5244572	0	0	0	0	113.031	527	MD04G1045000
MD04G1003800_2	Chr04:533458|534351	0	0	0	0	190.292	483	MD04G1003800
MD04G1046900_1	Chr04:5448570|5449014	0	0	0	0	174.685	341	MD04G1046900
MD04G1052000_1	Chr04:6109689|6109842	0	0	0	0	389.33	153	MD04G1052000
MD04G1004900_1	Chr04:616967|617858	0	0	0	0	224.315	362	MD04G1004900
MD04G1054200_1	Chr04:6438585|6439118	0	0	0	0	152.349	533	MD04G1054200
MD04G1061500_1	Chr04:8135378|8135759	0	0	0	0	156.345	381	MD04G1061500
MD04G1062200_1	Chr04:8197087|8199513	0	0	0	0	213.628	849	MD04G1062200
MD04G1062600_1	Chr04:8228464|8229374	0	0	0	0	370.785	219	MD04G1062600
MD04G1062800_4	Chr04:8267583|8269325	0	0	0	0	69.9212	1742	MD04G1062800
MD04G1062800_5	Chr04:8267598|8269325	0	0	0	0	70.5285	1727	MD04G1062800
n/a_509	Chr04:9545911|9546626	0	0	0	0	85.6978	715	n/a
MD05G1058800_1	Chr05:10285900|10286374	0	0	0	0	190.921	312	MD05G1058800
MD05G1004100_1	Chr05:1267096|1267699	0	0	0	0	187.533	433	MD05G1004100
MD05G1004100_2	Chr05:1267096|1267877	0	0	0	0	116.712	525	MD05G1004100
MD05G1067500_1	Chr05:12704697|12705636	0	0	0	0	177.434	518	MD05G1067500
MD05G1070700_1	Chr05:14517625|14518797	0	0	0	0	125.537	949	MD05G1070700
MD05G1071400_1	Chr05:15038776|15040023	0	0	0	0	132.198	927	MD05G1071400
MD05G1081400_1	Chr05:17045807|17046766	0	0	0	0	285.922	568	MD05G1081400
MD05G1081500_1	Chr05:17125133|17125897	0	0	0	0	126.09	644	MD05G1081500
MD05G1087100_3	Chr05:18552223|18556454	0	0	0	0	46.8814	1307	MD05G1087100
MD05G1010400_1	Chr05:2129175|2129335	0	0	0	0	372.297	160	MD05G1010400
MD05G1105600_1	Chr05:21881222|21881650	0	0	0	0	268.745	228	MD05G1105600
MD05G1121200_1	Chr05:24390135|24391445	0	0	0	0	214.996	570	MD05G1121200
MD05G1121500_1	Chr05:24412462|24414147	0	0	0	0	110.926	537	MD05G1121500
MD05G1122800_1	Chr05:24550710|24552950	0	0	0	0	361.015	495	MD05G1122800
MD05G1123800_1	Chr05:24612942|24613568	0	0	0	0	410.317	448	MD05G1123800
MD05G1126500_1	Chr05:24967608|24968094	0	0	0	0	205.055	396	MD05G1126500
MD05G1127100_1	Chr05:25047070|25047268	0	0	0	0	618.929	198	MD05G1127100
Apple_newGene_32886_1	Chr05:2597640|2599039	0	0	0	0	151.465	1399	Apple_newGene_32886
n/a_577	Chr05:26372173|26379024	0	0	0	0	63.2207	6851	n/a
n/a_582	Chr05:27106402|27155010	0	0	0	0	17.0177	48608	n/a
n/a_584	Chr05:27303257|27394950	0	0	0	0	125.705	91693	n/a
MD05G1143500_1	Chr05:27470528|27470729	0	0	0	0	403.989	201	MD05G1143500
n/a_585	Chr05:27643882|27662168	0	0	0	0	4.88632	18286	n/a
MD05G1145700_3	Chr05:27675932|27678603	0	0	0	0	136.414	655	MD05G1145700
MD05G1016500_1	Chr05:2902903|2903709	0	0	0	0	154.32	386	MD05G1016500
MD05G1170800_1	Chr05:30033685|30033982	0	0	0	0	291.781	210	MD05G1170800
MD05G1177400_1	Chr05:30450518|30450671	0	0	0	0	973.325	153	MD05G1177400
MD05G1177500_1	Chr05:30451213|30451412	0	0	0	0	461.864	199	MD05G1177500
n/a_600	Chr05:30789676|30792254	0	0	0	0	62.996	2578	n/a
MD05G1187100_1	Chr05:31522500|31522806	0	0	0	0	375.935	216	MD05G1187100
MD05G1189200_1	Chr05:31709311|31709534	0	0	0	0	267.119	223	MD05G1189200
MD05G1197300_1	Chr05:32449660|32450672	0	0	0	0	71.0835	862	MD05G1197300
n/a_606	Chr05:32485471|32510183	0	0	0	0	6.09522	24712	n/a
MD05G1206700_1	Chr05:33588519|33588797	0	0	0	0	214.271	278	MD05G1206700
n/a_620	Chr05:36800517|36848995	0	0	0	0	1.84313	48478	n/a
n/a_622	Chr05:36991794|36991966	0	0	0	0	356.244	172	n/a
n/a_623	Chr05:37513865|37514237	0	0	0	0	327.427	372	n/a
MD05G1242400_1	Chr05:37518570|37519116	0	0	0	0	231.78	257	MD05G1242400
MD05G1251500_1	Chr05:38322291|38323923	0	0	0	0	49.3349	1242	MD05G1251500
MD05G1254800_1	Chr05:38542916|38543818	0	0	0	0	161.868	368	MD05G1254800
MD05G1257400_1	Chr05:39373868|39374131	0	0	0	0	232.981	263	MD05G1257400
MD05G1271700_3	Chr05:40708662|40708843	0	0	0	0	677.06	181	MD05G1271700
MD05G1275500_1	Chr05:40980989|40988358	0	0	0	0	121.335	505	MD05G1275500
MD05G1275500_2	Chr05:40980989|40990298	0	0	0	0	58.3347	1392	MD05G1275500
MD05G1282900_1	Chr05:41647512|41648094	0	0	0	0	105.282	582	MD05G1282900
MD05G1026400_1	Chr05:4221020|4222205	0	0	0	0	144.487	562	MD05G1026400
MD05G1291000_2	Chr05:42268845|42269450	0	0	0	0	101.279	605	MD05G1291000
n/a_637	Chr05:42682688|42710734	0	0	0	0	5.79062	28046	n/a
MD05G1027100_2	Chr05:4303175|4303364	0	0	0	0	429.639	189	MD05G1027100
MD05G1027100_4	Chr05:4303420|4303586	0	0	0	0	978.336	166	MD05G1027100
MD05G1299500_1	Chr05:43307324|43307480	0	0	0	0	392.782	156	MD05G1299500
n/a_642	Chr05:44187779|44187935	0	0	0	0	780.787	156	n/a
n/a_643	Chr05:44187782|44187935	0	0	0	0	796.097	153	n/a
n/a_644	Chr05:44187866|44188207	0	0	0	0	179.689	341	n/a
MD05G1311900_1	Chr05:44188124|44188758	0	0	0	0	253.756	320	MD05G1311900
MD05G1313100_1	Chr05:44381264|44382944	0	0	0	0	107.007	835	MD05G1313100
MD05G1322800_1	Chr05:45008423|45009485	0	0	0	0	100.373	809	MD05G1322800
MD05G1322800_2	Chr05:45008423|45009962	0	0	0	0	152.381	935	MD05G1322800
n/a_660	Chr05:45070797|45071044	0	0	0	0	241.164	247	n/a
n/a_667	Chr05:45800353|45810556	0	0	0	0	6.00548	10203	n/a
MD05G1341400_4	Chr05:46186675|46187131	0	0	0	0	130.63	456	MD05G1341400
MD05G1341400_6	Chr05:46186696|46187152	0	0	0	0	130.63	456	MD05G1341400
MD05G1341400_8	Chr05:46186703|46187159	0	0	0	0	356.149	456	MD05G1341400
MD05G1341400_9	Chr05:46186819|46187014	0	0	0	0	624.63	195	MD05G1341400
MD05G1341400_10	Chr05:46186819|46187046	0	0	0	0	715.435	227	MD05G1341400
MD05G1342900_1	Chr05:46326472|46329357	0	0	0	0	61.3968	1996	MD05G1342900
MD05G1346500_1	Chr05:46582052|46582797	0	0	0	0	108.502	549	MD05G1346500
n/a_679	Chr05:46610748|46630480	0	0	0	0	14.4033	19732	n/a
MD05G1348100_2	Chr05:46665059|46665622	0	0	0	0	208.21	390	MD05G1348100
MD05G1031400_1	Chr05:5092061|5095464	0	0	0	0	21.0708	2908	MD05G1031400
MD05G1032800_1	Chr05:5342723|5343009	0	0	0	0	214.245	286	MD05G1032800
MD05G1039700_2	Chr05:6755534|6755787	0	0	0	0	510.704	159	MD05G1039700
MD05G1050600_1	Chr05:8763120|8765054	0	0	0	0	121.378	669	MD05G1050600
n/a_560	Chr05:9923009|9923222	0	0	0	0	279.659	213	n/a
n/a_692	Chr06:1184144|1210797	0	0	0	0	1019.39	26653	n/a
MD06G1011200_1	Chr06:1338875|1340917	0	0	0	0	58.1146	1025	MD06G1011200
MD06G1065400_1	Chr06:13527318|13527472	0	0	0	0	386.802	154	MD06G1065400
MD06G1067000_1	Chr06:14246597|14246938	0	0	0	0	261.855	234	MD06G1067000
MD06G1067000_2	Chr06:14250872|14252042	0	0	0	0	134.161	444	MD06G1067000
MD06G1067000_3	Chr06:14251952|14252245	0	0	0	0	453.642	179	MD06G1067000
MD06G1071200_1	Chr06:17264043|17265735	0	0	0	0	140.612	1302	MD06G1071200
n/a_710	Chr06:19223917|19262585	0	0	0	0	4.19995	38668	n/a
MD06G1001600_1	Chr06:193139|193292	0	0	0	0	530.731	153	MD06G1001600
MD06G1079100_1	Chr06:19473178|19474419	0	0	0	0	129.607	1149	MD06G1079100
MD06G1079100_2	Chr06:19473343|19473559	0	0	0	0	275.775	216	MD06G1079100
MD06G1079100_3	Chr06:19474042|19474223	0	0	0	0	1180.74	181	MD06G1079100
MD06G1001600_3	Chr06:196520|196706	0	0	0	0	329.43	186	MD06G1001600
MD06G1082000_2	Chr06:20134032|20134507	0	0	0	0	158.741	386	MD06G1082000
MD06G1083100_1	Chr06:20401808|20401959	0	0	0	0	537.761	151	MD06G1083100
MD06G1085100_1	Chr06:20890092|20890327	0	0	0	0	253.479	235	MD06G1085100
n/a_711	Chr06:20911957|21005923	0	0	0	0	16.4191	93966	n/a
MD06G1087900_1	Chr06:21494223|21495026	0	0	0	0	151.169	608	MD06G1087900
MD06G1087900_2	Chr06:21494223|21495534	0	0	0	0	70.4941	845	MD06G1087900
MD06G1088700_1	Chr06:21629369|21629540	0	0	0	0	348.348	171	MD06G1088700
MD06G1093000_1	Chr06:22379746|22380169	0	0	0	0	289.711	423	MD06G1093000
MD06G1111100_1	Chr06:24996643|24997597	0	0	0	0	244.618	494	MD06G1111100
MD06G1118500_1	Chr06:25716886|25717072	0	0	0	0	329.43	186	MD06G1118500
MD06G1133200_1	Chr06:27731104|27731573	0	0	0	0	431.925	282	MD06G1133200
MD06G1002700_1	Chr06:279871|280029	0	0	0	0	2682.27	158	MD06G1002700
MD06G1137700_1	Chr06:28282699|28283342	0	0	0	0	504.809	177	MD06G1137700
MD06G1143300_1	Chr06:28689834|28690777	0	0	0	0	89.1729	668	MD06G1143300
n/a_722	Chr06:28747768|28752663	0	0	0	0	500.707	4895	n/a
MD06G1025700_1	Chr06:3092621|3092849	0	0	0	0	261.261	228	MD06G1025700
n/a_737	Chr06:31468256|31470280	0	0	0	0	30.2737	2024	n/a
MD06G1175500_1	Chr06:31506121|31506629	0	0	0	0	171.664	347	MD06G1175500
MD06G1175500_2	Chr06:31508222|31509609	0	0	0	0	362.508	224	MD06G1175500
n/a_745	Chr06:31937422|31940969	0	0	0	0	22.8931	3547	n/a
MD06G1185300_1	Chr06:32323246|32323409	0	0	0	0	375.914	163	MD06G1185300
MD06G1204300_1	Chr06:33922870|33923456	0	0	0	0	244.129	244	MD06G1204300
n/a_749	Chr06:34201395|34207656	0	0	0	0	23.7851	6261	n/a
MD06G1209200_1	Chr06:34265037|34265237	0	0	0	0	459.555	200	MD06G1209200
MD06G1214600_1	Chr06:34727213|34727381	0	0	0	0	547.089	168	MD06G1214600
MD06G1228200_1	Chr06:35834694|35835613	0	0	0	0	219.358	419	MD06G1228200
MD06G1230800_1	Chr06:36027036|36027187	0	0	0	0	394.487	151	MD06G1230800
MD06G1238300_1	Chr06:36920960|36921202	0	0	0	0	246.147	242	MD06G1238300
n/a_702	Chr06:4983007|4983751	0	0	0	0	82.3575	744	n/a
MD06G1039300_1	Chr06:5014005|5014551	0	0	0	0	208.278	286	MD06G1039300
MD06G1004600_1	Chr06:507017|508053	0	0	0	0	220.059	369	MD06G1004600
MD06G1043800_5	Chr06:5890982|5895051	0	0	0	0	40.9403	2245	MD06G1043800
MD06G1005900_1	Chr06:624168|625962	0	0	0	0	75.5536	1622	MD06G1005900
MD06G1048100_1	Chr06:6505730|6505885	0	0	0	0	785.825	155	MD06G1048100
MD06G1048100_2	Chr06:6506802|6508904	0	0	0	0	89.6268	906	MD06G1048100
MD06G1052200_1	Chr06:7517557|7518166	0	0	0	0	220.059	369	MD06G1052200
MD06G1055600_1	Chr06:8315537|8317824	0	0	0	0	64.5997	1257	MD06G1055600
MD06G1057900_1	Chr06:8959476|8960369	0	0	0	0	126.338	485	MD06G1057900
MD06G1008500_1	Chr06:935077|939170	0	0	0	0	48.4379	1265	MD06G1008500
MD07G1011100_1	Chr07:1006259|1006430	0	0	0	0	474.865	171	MD07G1011100
MD07G1098900_2	Chr07:10901843|10901995	0	0	0	0	403.118	152	MD07G1098900
MD07G1012900_1	Chr07:1144377|1144575	0	0	0	0	451.269	198	MD07G1012900
n/a_799	Chr07:11672452|11768750	0	0	0	0	0.927862	96298	n/a
MD07G1109400_1	Chr07:12590552|12597259	0	0	0	0	51.4587	1578	MD07G1109400
MD07G1109500_1	Chr07:12600695|12600931	0	0	0	0	252.405	236	MD07G1109500
MD07G1111000_2	Chr07:12769043|12769237	0	0	0	0	624.63	195	MD07G1111000
MD07G1112800_1	Chr07:13204847|13208360	0	0	0	0	103.416	576	MD07G1112800
n/a_806	Chr07:13986834|13987059	0	0	0	0	360.897	225	n/a
MD07G1022200_1	Chr07:1867795|1869283	0	0	0	0	152.423	402	MD07G1022200
n/a_809	Chr07:18697747|18697934	0	0	0	0	434.235	187	n/a
MD07G1132600_1	Chr07:19181137|19184897	0	0	0	0	87.202	2108	MD07G1132600
MD07G1135000_1	Chr07:19692311|19695744	0	0	0	0	45.3545	1351	MD07G1135000
MD07G1135300_1	Chr07:19732207|19732360	0	0	0	0	389.33	153	MD07G1135300
MD07G1135900_1	Chr07:19821211|19821607	0	0	0	0	195.303	305	MD07G1135900
MD07G1141100_1	Chr07:20455137|20457298	0	0	0	0	83.8862	968	MD07G1141100
MD07G1141400_1	Chr07:20510258|20512024	0	0	0	0	68.971	1766	MD07G1141400
MD07G1149400_1	Chr07:21771436|21781927	0	0	0	0	21.0077	5798	MD07G1149400
MD07G1149400_2	Chr07:21778263|21781927	0	0	0	0	23.4149	2544	MD07G1149400
MD07G1157800_1	Chr07:22941969|22943112	0	0	0	0	106.497	839	MD07G1157800
MD07G1159400_1	Chr07:23327913|23330236	0	0	0	0	94.7513	857	MD07G1159400
MD07G1159600_1	Chr07:23344560|23344752	0	0	0	0	310.247	192	MD07G1159600
MD07G1169800_1	Chr07:24438049|24438914	0	0	0	0	258.24	346	MD07G1169800
MD07G1001800_1	Chr07:245879|251118	0	0	0	0	41.2192	1970	MD07G1001800
n/a_814	Chr07:24739285|24739989	0	0	0	0	174.074	704	n/a
MD07G1001800_3	Chr07:250097|250352	0	0	0	0	636.877	255	MD07G1001800
n/a_766	Chr07:2559349|2607339	0	0	0	0	1.24125	47990	n/a
MD07G1185600_1	Chr07:26656687|26656845	0	0	0	0	565.514	158	MD07G1185600
n/a_773	Chr07:2732597|2735092	0	0	0	0	3091.78	2495	n/a
MD07G1196500_1	Chr07:27480370|27480621	0	0	0	0	610.298	251	MD07G1196500
MD07G1197500_1	Chr07:27552110|27552269	0	0	0	0	385.371	159	MD07G1197500
MD07G1200400_1	Chr07:27849716|27850034	0	0	0	0	187.319	318	MD07G1200400
MD07G1204200_1	Chr07:28184573|28184727	0	0	0	0	527.285	154	MD07G1204200
MD07G1234000_1	Chr07:30757021|30758557	0	0	0	0	272.935	449	MD07G1234000
MD07G1234900_1	Chr07:30832799|30833802	0	0	0	0	281.073	218	MD07G1234900
MD07G1238300_1	Chr07:31032830|31033032	0	0	0	0	455.005	202	MD07G1238300
n/a_827	Chr07:31794079|31794777	0	0	0	0	128.01	698	n/a
n/a_829	Chr07:31854637|31865732	0	0	0	0	155.697	11095	n/a
n/a_830	Chr07:31888324|31903951	0	0	0	0	3.92103	15627	n/a
MD07G1252300_1	Chr07:32018394|32021145	0	0	0	0	78.5851	758	MD07G1252300
MD07G1252300_2	Chr07:32020363|32021145	0	0	0	0	175.068	350	MD07G1252300
MD07G1252900_1	Chr07:32050591|32051710	0	0	0	0	256.756	348	MD07G1252900
MD07G1257700_2	Chr07:32388858|32389024	0	0	0	0	489.168	166	MD07G1257700
n/a_777	Chr07:3247616|3306470	0	0	0	0	5.06061	58854	n/a
MD07G1268700_1	Chr07:33611176|33611367	0	0	0	0	311.872	191	MD07G1268700
MD07G1268800_1	Chr07:33634364|33634531	0	0	0	0	366.91	167	MD07G1268800
MD07G1268800_2	Chr07:33635483|33635687	0	0	0	0	291.997	204	MD07G1268800
Apple_newGene_44570_1	Chr07:33828786|33830463	0	0	0	0	35.5203	1677	Apple_newGene_44570
n/a_840	Chr07:33963515|33983308	0	0	0	0	26.3138	19793	n/a
MD07G1294900_1	Chr07:35561788|35562007	0	0	0	0	279.79	219	MD07G1294900
MD07G1298900_1	Chr07:35829249|35829954	0	0	0	0	117.259	508	MD07G1298900
MD07G1301500_1	Chr07:36016149|36016858	0	0	0	0	172.846	709	MD07G1301500
MD07G1043100_1	Chr07:3610571|3610889	0	0	0	0	187.319	318	MD07G1043100
MD07G1306500_1	Chr07:36301421|36301682	0	0	0	0	456.456	261	MD07G1306500
MD07G1307000_1	Chr07:36330647|36332255	0	0	0	0	111.407	550	MD07G1307000
MD07G1044900_1	Chr07:3850562|3854873	0	0	0	0	183.455	501	MD07G1044900
MD07G1054300_1	Chr07:5015189|5019367	0	0	0	0	57.2119	1071	MD07G1054300
MD07G1058300_1	Chr07:5417528|5418391	0	0	0	0	69.0237	863	MD07G1058300
n/a_786	Chr07:6170140|6175236	0	0	0	0	27.6235	5096	n/a
n/a_790	Chr07:6977113|6995791	0	0	0	0	13.1222	18678	n/a
MD07G1075000_1	Chr07:7188785|7189848	0	0	0	0	57.6425	1063	MD07G1075000
MD07G1077300_1	Chr07:7360807|7365598	0	0	0	0	97.2603	1260	MD07G1077300
MD07G1087300_1	Chr07:9105269|9108377	0	0	0	0	535.623	665	MD07G1087300
MD07G1087400_1	Chr07:9123949|9124132	0	0	0	0	665.589	183	MD07G1087400
MD08G1013800_1	Chr08:1051712|1053831	0	0	0	0	86.4968	1033	MD08G1013800
MD08G1126500_1	Chr08:11893105|11893309	0	0	0	0	291.997	204	MD08G1126500
MD08G1015600_2	Chr08:1225042|1225323	0	0	0	0	288.975	281	MD08G1015600
n/a_896	Chr08:14268205|14269135	0	0	0	0	151.365	930	n/a
n/a_851	Chr08:1492153|1513431	0	0	0	0	13.3568	21278	n/a
MD08G1173000_2	Chr08:20814493|20814650	0	0	0	0	379.411	157	MD08G1173000
MD08G1174000_1	Chr08:21137331|21140058	0	0	0	0	79.5293	749	MD08G1174000
MD08G1175900_1	Chr08:21363987|21365625	0	0	0	0	59.0559	1375	MD08G1175900
MD08G1179700_1	Chr08:22125017|22126449	0	0	0	0	113.41	1432	MD08G1179700
MD08G1188000_1	Chr08:23645115|23645320	0	0	0	0	298.897	205	MD08G1188000
MD08G1188800_1	Chr08:23848294|23849935	0	0	0	0	252.18	322	MD08G1188800
MD08G1192800_1	Chr08:24834628|24836185	0	0	0	0	276.801	538	MD08G1192800
n/a_922	Chr08:27433657|27434087	0	0	0	0	213.746	430	n/a
MD08G1211200_1	Chr08:27487259|27487989	0	0	0	0	122.399	730	MD08G1211200
n/a_923	Chr08:27492312|27492755	0	0	0	0	138.316	443	n/a
MD08G1037800_1	Chr08:2776601|2776939	0	0	0	0	518.31	235	MD08G1037800
n/a_929	Chr08:29567433|29580760	0	0	0	0	11.1742	13327	n/a
MD08G1230300_2	Chr08:29584522|29584700	0	0	0	0	501.973	178	MD08G1230300
n/a_934	Chr08:29829667|29874944	0	0	0	0	3.58689	45277	n/a
n/a_935	Chr08:29829793|29875349	0	0	0	0	13.3685	45556	n/a
MD08G1040300_1	Chr08:2984175|2984474	0	0	0	0	204.93	299	MD08G1040300
n/a_937	Chr08:29875912|29902211	0	0	0	0	5115.4	26299	n/a
n/a_938	Chr08:29876242|29903527	0	0	0	0	3.27474	27285	n/a
n/a_863	Chr08:3030002|3030745	0	0	0	0	327.868	743	n/a
n/a_865	Chr08:3055511|3071558	0	0	0	0	9.28016	16047	n/a
MD08G1240800_1	Chr08:30672007|30672194	0	0	0	0	491.502	187	MD08G1240800
MD08G1241700_1	Chr08:30721829|30722662	0	0	0	0	122.567	729	MD08G1241700
MD08G1242000_1	Chr08:30770704|30771575	0	0	0	0	83.3112	715	MD08G1242000
n/a_867	Chr08:3080254|3116089	0	0	0	0	4.15568	35835	n/a
n/a_869	Chr08:3080741|3127320	0	0	0	0	1.97323	46579	n/a
n/a_947	Chr08:30839518|30848109	0	0	0	0	809.521	8591	n/a
MD08G1244900_2	Chr08:30974584|30979662	0	0	0	0	103.839	782	MD08G1244900
MD08G1248500_1	Chr08:31255812|31257349	0	0	0	0	3625.73	516	MD08G1248500
MD08G1250200_1	Chr08:31513295|31513506	0	0	0	0	282.31	211	MD08G1250200
MD08G1043100_1	Chr08:3255170|3256513	0	0	0	0	132.569	674	MD08G1043100
MD08G1051800_1	Chr08:4084342|4084548	0	0	0	0	392.28	207	MD08G1051800
MD08G1004500_2	Chr08:418024|418707	0	0	0	0	171.171	348	MD08G1004500
MD08G1004500_3	Chr08:418066|418707	0	0	0	0	400.483	306	MD08G1004500
n/a_879	Chr08:4382657|4429858	0	0	0	0	9.73612	47201	n/a
n/a_882	Chr08:5038071|5045091	0	0	0	0	8.72848	7020	n/a
n/a_848	Chr08:543087|548113	0	0	0	0	11.8519	5026	n/a
MD08G1078500_1	Chr08:6540945|6541313	0	0	0	0	249.758	368	MD08G1078500
MD08G1009200_1	Chr08:679770|679954	0	0	0	0	441.314	184	MD08G1009200
MD08G1095600_1	Chr08:8008506|8010507	0	0	0	0	142.83	429	MD08G1095600
MD08G1110400_1	Chr08:9705683|9708675	0	0	0	0	28.7536	2131	MD08G1110400
MD08G1110400_3	Chr08:9707195|9708675	0	0	0	0	42.5786	1399	MD08G1110400
MD09G1129800_1	Chr09:10021517|10021696	0	0	0	0	513.469	179	MD09G1129800
MD09G1131300_1	Chr09:10118820|10120904	0	0	0	0	72.9994	816	MD09G1131300
MD09G1131300_2	Chr09:10120553|10120904	0	0	0	0	260.12	229	MD09G1131300
MD09G1134700_1	Chr09:10353700|10353902	0	0	0	0	294.888	202	MD09G1134700
MD09G1134900_1	Chr09:10363832|10364006	0	0	0	0	865.662	174	MD09G1134900
MD09G1017700_1	Chr09:1102355|1103467	0	0	0	0	159.219	510	MD09G1017700
MD09G1151600_1	Chr09:11985911|11986753	0	0	0	0	96.5437	617	MD09G1151600
MD09G1152100_2	Chr09:12046137|12046424	0	0	0	0	282.933	287	MD09G1152100
MD09G1022200_1	Chr09:1339213|1339812	0	0	0	0	137.078	447	MD09G1022200
MD09G1168900_1	Chr09:13977565|13978976	0	0	0	0	83.7133	970	MD09G1168900
MD09G1172800_2	Chr09:14628729|14628956	0	0	0	0	404.894	227	MD09G1172800
MD09G1176500_1	Chr09:15095672|15098312	0	0	0	0	131.772	465	MD09G1176500
MD09G1178000_1	Chr09:15230878|15231792	0	0	0	0	116.799	510	MD09G1178000
MD09G1179800_1	Chr09:15403312|15404036	0	0	0	0	178.881	333	MD09G1179800
MD09G1184900_1	Chr09:16023722|16024702	0	0	0	0	130.63	456	MD09G1184900
MD09G1187400_1	Chr09:16348380|16348646	0	0	0	0	223.938	266	MD09G1187400
MD09G1189600_1	Chr09:16569336|16569537	0	0	0	0	296.356	201	MD09G1189600
MD09G1027400_1	Chr09:1708066|1708372	0	0	0	0	291.997	306	MD09G1027400
MD09G1027400_2	Chr09:1709581|1709731	0	0	0	0	2796.88	150	MD09G1027400
MD09G1028500_1	Chr09:1762356|1762512	0	0	0	0	392.782	156	MD09G1028500
MD09G1029600_1	Chr09:1819786|1820268	0	0	0	0	222.007	276	MD09G1029600
MD09G1206200_1	Chr09:19713837|19715332	0	0	0	0	303.142	393	MD09G1206200
MD09G1209300_1	Chr09:20171742|20174106	0	0	0	0	157.579	1293	MD09G1209300
n/a_1050	Chr09:20862297|20893047	0	0	0	0	1.99265	30750	n/a
n/a_1051	Chr09:20862297|20959225	0	0	0	0	0.921831	96928	n/a
n/a_1053	Chr09:20864133|20961709	0	0	0	0	25.9451	97576	n/a
n/a_1056	Chr09:20865852|20963360	0	0	0	0	59.3837	97508	n/a
MD09G1037400_1	Chr09:2277903|2278096	0	0	0	0	476.222	193	MD09G1037400
MD09G1000100_1	Chr09:2403|14042	0	0	0	0	118.542	1005	MD09G1000100
MD09G1000100_2	Chr09:2403|14335	0	0	0	0	51.9786	1146	MD09G1000100
MD09G1222500_1	Chr09:25953106|25954416	0	0	0	0	311.118	261	MD09G1222500
MD09G1041300_2	Chr09:2656294|2656522	0	0	0	0	403.118	228	MD09G1041300
Apple_newGene_51829_1	Chr09:29412562|29412725	0	0	0	0	747.256	163	Apple_newGene_51829
n/a_1061	Chr09:29564379|29566853	0	0	0	0	32.8221	2474	n/a
MD09G1236500_1	Chr09:29833688|29834142	0	0	0	0	192.081	319	MD09G1236500
MD09G1236600_1	Chr09:29859807|29862379	0	0	0	0	53.4211	2294	MD09G1236600
MD09G1255900_1	Chr09:32748249|32749635	0	0	0	0	107.782	829	MD09G1255900
n/a_1063	Chr09:32765658|32801276	0	0	0	0	30553	35618	n/a
MD09G1262400_3	Chr09:33580070|33580319	0	0	0	0	246.08	249	MD09G1262400
MD09G1262400_4	Chr09:33580151|33580353	0	0	0	0	303.336	202	MD09G1262400
n/a_1070	Chr09:35152672|35152937	0	0	0	0	462.445	265	n/a
MD09G1279600_1	Chr09:35650105|35650285	0	0	0	0	451.121	180	MD09G1279600
MD09G1282200_2	Chr09:35934204|35935041	0	0	0	0	142.336	837	MD09G1282200
n/a_977	Chr09:3605357|3610529	0	0	0	0	40.3105	5172	n/a
MD09G1284300_1	Chr09:36196658|36198375	0	0	0	0	118.748	1032	MD09G1284300
MD09G1285500_1	Chr09:36376067|36376381	0	0	0	0	258.605	314	MD09G1285500
MD09G1286100_1	Chr09:36477128|36478055	0	0	0	0	159.219	510	MD09G1286100
MD09G1000200_1	Chr09:37390|39191	0	0	0	0	120.145	510	MD09G1000200
n/a_983	Chr09:3762575|3765590	0	0	0	0	26.9326	3015	n/a
MD09G1064300_1	Chr09:4403416|4403986	0	0	0	0	485.604	368	MD09G1064300
MD09G1064500_1	Chr09:4415789|4416776	0	0	0	0	60.352	987	MD09G1064500
MD09G1065800_1	Chr09:4486556|4488272	0	0	0	0	47.3204	1716	MD09G1065800
MD09G1069500_1	Chr09:4749922|4750553	0	0	0	0	227.573	531	MD09G1069500
MD09G1076900_1	Chr09:5424285|5424491	0	0	0	0	289.162	206	MD09G1076900
MD09G1081200_1	Chr09:5719039|5719290	0	0	0	0	323.513	251	MD09G1081200
MD09G1082200_1	Chr09:5775941|5776202	0	0	0	0	227.357	262	MD09G1082200
MD09G1088000_1	Chr09:6324225|6325038	0	0	0	0	365.347	587	MD09G1088000
n/a_1003	Chr09:6870598|6923640	0	0	0	0	19.151	53042	n/a
n/a_1004	Chr09:6880118|6943658	0	0	0	0	4.21866	63540	n/a
n/a_1006	Chr09:6883047|6925595	0	0	0	0	1.44011	42548	n/a
MD09G1000300_1	Chr09:68936|72280	0	0	0	0	112.223	546	MD09G1000300
n/a_1010	Chr09:6896964|6937600	0	0	0	0	1.50787	40636	n/a
MD09G1117200_2	Chr09:9003820|9004702	0	0	0	0	123.288	497	MD09G1117200
MD09G1120600_1	Chr09:9332040|9333842	0	0	0	0	42.6402	1437	MD09G1120600
n/a_1020	Chr09:9847986|9873231	0	0	0	0	48.5434	25245	n/a
MD10G1075500_1	Chr10:10718072|10718307	0	0	0	0	345.54	235	MD10G1075500
MD10G1075500_3	Chr10:10718162|10718347	0	0	0	0	321.986	185	MD10G1075500
MD10G1077400_1	Chr10:10946369|10947279	0	0	0	0	197.571	411	MD10G1077400
MD10G1081700_1	Chr10:12024965|12025156	0	0	0	0	320.806	191	MD10G1081700
n/a_1118	Chr10:12158098|12159501	0	0	0	0	65.5103	1403	n/a
MD10G1009100_2	Chr10:1318842|1319443	0	0	0	0	259.635	354	MD10G1009100
MD10G1090700_1	Chr10:13600397|13600613	0	0	0	0	283.676	216	MD10G1090700
MD10G1090900_1	Chr10:13615741|13615948	0	0	0	0	296.009	207	MD10G1090900
MD10G1096200_1	Chr10:15106994|15108775	0	0	0	0	50.1691	1781	MD10G1096200
n/a_1122	Chr10:16041521|16098230	0	0	0	0	2.10081	56709	n/a
MD10G1102000_1	Chr10:16632767|16633824	0	0	0	0	150.427	611	MD10G1102000
MD10G1104300_2	Chr10:16997080|16997997	0	0	0	0	826.477	481	MD10G1104300
MD10G1111800_1	Chr10:18317545|18317743	0	0	0	0	300.846	198	MD10G1111800
n/a_1127	Chr10:19577946|19580504	0	0	0	0	23.2867	2558	n/a
MD10G1127600_2	Chr10:20792936|20793115	0	0	0	0	332.779	179	MD10G1127600
Apple_newGene_55239_1	Chr10:22106257|22106433	0	0	0	0	461.374	176	Apple_newGene_55239
MD10G1138300_1	Chr10:22297227|22298868	0	0	0	0	74.0024	828	MD10G1138300
MD10G1141700_1	Chr10:22760433|22760898	0	0	0	0	232.67	349	MD10G1141700
MD10G1141800_1	Chr10:22765341|22766399	0	0	0	0	169.806	829	MD10G1141800
MD10G1142100_1	Chr10:22780312|22781525	0	0	0	0	82.0633	1120	MD10G1142100
MD10G1142100_2	Chr10:22780851|22781492	0	0	0	0	190.02	641	MD10G1142100
MD10G1142300_1	Chr10:22808157|22810358	0	0	0	0	48.7074	1258	MD10G1142300
MD10G1145100_1	Chr10:23147107|23147778	0	0	0	0	121.095	506	MD10G1145100
MD10G1001000_1	Chr10:236523|237369	0	0	0	0	194.727	472	MD10G1001000
MD10G1168300_1	Chr10:26041638|26041892	0	0	0	0	390.394	208	MD10G1168300
n/a_1145	Chr10:27462184|27509996	0	0	0	0	39.0876	47812	n/a
MD10G1192000_1	Chr10:28857248|28857485	0	0	0	0	258.54	237	MD10G1192000
MD10G1193500_1	Chr10:28954054|28954218	0	0	0	0	363.216	164	MD10G1193500
MD10G1197600_1	Chr10:29576107|29577095	0	0	0	0	269.475	452	MD10G1197600
MD10G1202300_1	Chr10:30010069|30010298	0	0	0	0	260.12	229	MD10G1202300
MD10G1024100_1	Chr10:3011660|3013003	0	0	0	0	119.767	678	MD10G1024100
MD10G1206500_1	Chr10:30542970|30545262	0	0	0	0	171.171	522	MD10G1206500
MD10G1206600_1	Chr10:30555168|30555507	0	0	0	0	361.498	339	MD10G1206600
MD10G1206600_3	Chr10:30555211|30555469	0	0	0	0	314.736	258	MD10G1206600
MD10G1208700_1	Chr10:30798654|30798953	0	0	0	0	199.222	299	MD10G1208700
MD10G1211200_1	Chr10:31047017|31047546	0	0	0	0	1108.23	215	MD10G1211200
MD10G1218800_1	Chr10:31663156|31664507	0	0	0	0	221.863	549	MD10G1218800
MD10G1223600_1	Chr10:32159076|32159610	0	0	0	0	527.226	534	MD10G1223600
MD10G1224100_1	Chr10:32189858|32190014	0	0	0	0	381.843	156	MD10G1224100
MD10G1228200_1	Chr10:32489099|32490481	0	0	0	0	133.336	609	MD10G1228200
MD10G1230400_1	Chr10:32737355|32738405	0	0	0	0	126.202	472	MD10G1230400
MD10G1236000_1	Chr10:33257647|33259542	0	0	0	0	42.0674	1416	MD10G1236000
n/a_1084	Chr10:33417|33695	0	0	0	0	1418.1	278	n/a
n/a_1085	Chr10:33417|33729	0	0	0	0	6461.95	312	n/a
n/a_1156	Chr10:33697729|33700806	0	0	0	0	145.145	3077	n/a
MD10G1257300_3	Chr10:35155017|35155175	0	0	0	0	377.009	158	MD10G1257300
MD10G1278900_1	Chr10:36990730|36993836	0	0	0	0	26.9684	3011	MD10G1278900
MD10G1279900_1	Chr10:37094078|37095099	0	0	0	0	249.852	325	MD10G1279900
MD10G1285200_1	Chr10:37515015|37519278	0	0	0	0	90.8041	984	MD10G1285200
MD10G1289100_1	Chr10:37823415|37823902	0	0	0	0	315.845	388	MD10G1289100
MD10G1291400_1	Chr10:37998333|37998543	0	0	0	0	291.781	210	MD10G1291400
MD10G1296100_1	Chr10:38400053|38402088	0	0	0	0	54.4174	1126	MD10G1296100
MD10G1296900_1	Chr10:38450374|38450537	0	0	0	0	498.171	163	MD10G1296900
MD10G1298200_1	Chr10:38528725|38528885	0	0	0	0	382.962	160	MD10G1298200
MD10G1314900_3	Chr10:39894867|39895071	0	0	0	0	300.363	204	MD10G1314900
MD10G1314900_8	Chr10:39895500|39895728	0	0	0	0	403.118	228	MD10G1314900
MD10G1328100_1	Chr10:40755855|40756590	0	0	0	0	356.931	455	MD10G1328100
n/a_1182	Chr10:41007005|41023740	0	0	0	0	53.3744	16735	n/a
MD10G1042100_1	Chr10:5428938|5430152	0	0	0	0	307.049	291	MD10G1042100
MD10G1044100_1	Chr10:5934453|5934764	0	0	0	0	197.022	311	MD10G1044100
MD10G1047900_1	Chr10:6383469|6388094	0	0	0	0	22.9754	3889	MD10G1047900
MD10G1052500_1	Chr10:6965959|6967678	0	0	0	0	95.2939	643	MD10G1052500
MD10G1053500_1	Chr10:7192742|7192950	0	0	0	0	390.394	208	MD10G1053500
MD10G1056800_1	Chr10:7745911|7746478	0	0	0	0	262.643	567	MD10G1056800
MD10G1057900_1	Chr10:7848134|7848342	0	0	0	0	585.59	208	MD10G1057900
MD10G1066800_1	Chr10:9199791|9200449	0	0	0	0	271.124	226	MD10G1066800
MD10G1006400_1	Chr10:958356|958929	0	0	0	0	267.338	573	MD10G1006400
MD11G1116800_1	Chr11:10569668|10570382	0	0	0	0	1054.29	113	MD11G1116800
MD11G1117100_4	Chr11:10604744|10607469	0	0	0	0	161.138	1109	MD11G1117100
MD11G1130500_1	Chr11:11841311|11841462	0	0	0	0	405.788	151	MD11G1130500
MD11G1130600_1	Chr11:11843726|11843888	0	0	0	0	501.246	162	MD11G1130600
MD11G1131700_2	Chr11:11923533|11925750	0	0	0	0	116.269	527	MD11G1131700
MD11G1134400_1	Chr11:12341328|12342952	0	0	0	0	78.056	785	MD11G1134400
MD11G1134700_1	Chr11:12396338|12397116	0	0	0	0	125.561	488	MD11G1134700
MD11G1016000_1	Chr11:1260348|1260560	0	0	0	0	280.979	212	MD11G1016000
MD11G1016000_2	Chr11:1261901|1262108	0	0	0	0	392.28	207	MD11G1016000
MD11G1139900_1	Chr11:12981552|12983562	0	0	0	0	90.2243	900	MD11G1139900
MD11G1016800_1	Chr11:1364709|1364889	0	0	0	0	340.411	180	MD11G1016800
MD11G1156300_3	Chr11:15034841|15035077	0	0	0	0	344.076	236	MD11G1156300
n/a_1200	Chr11:1658347|1668707	0	0	0	0	26.6151	10360	n/a
MD11G1168600_1	Chr11:18050885|18053142	0	0	0	0	94.1228	651	MD11G1168600
MD11G1174900_1	Chr11:20588768|20590281	0	0	0	0	150.735	813	MD11G1174900
MD11G1182700_1	Chr11:22533608|22537596	0	0	0	0	85.1572	1399	MD11G1182700
n/a_1208	Chr11:2396503|2417608	0	0	0	0	43.7477	21105	n/a
MD11G1184700_1	Chr11:24722978|24723553	0	0	0	0	178.122	344	MD11G1184700
MD11G1204000_1	Chr11:29780908|29783516	0	0	0	0	111.388	729	MD11G1204000
n/a_1216	Chr11:2983810|2996984	0	0	0	0	38.4335	13174	n/a
MD11G1208400_1	Chr11:30356670|30356824	0	0	0	0	397.883	154	MD11G1208400
MD11G1208900_1	Chr11:30461157|30462259	0	0	0	0	142.21	571	MD11G1208900
MD11G1210600_1	Chr11:30797696|30798343	0	0	0	0	395.316	155	MD11G1210600
MD11G1211400_1	Chr11:30915851|30916048	0	0	0	0	311.035	197	MD11G1211400
MD11G1035700_1	Chr11:3124922|3126165	0	0	0	0	102.528	792	MD11G1035700
MD11G1221900_1	Chr11:32507827|32508704	0	0	0	0	69.8677	877	MD11G1221900
MD11G1221900_2	Chr11:32507827|32510516	0	0	0	0	34.1165	1746	MD11G1221900
MD11G1221900_3	Chr11:32507975|32508198	0	0	0	0	267.119	223	MD11G1221900
MD11G1226300_1	Chr11:33014778|33014964	0	0	0	0	800.638	186	MD11G1226300
MD11G1226300_3	Chr11:33017880|33018108	0	0	0	0	268.745	228	MD11G1226300
MD11G1228300_1	Chr11:33215330|33215506	0	0	0	0	692.061	176	MD11G1228300
MD11G1237500_1	Chr11:34537701|34543086	0	0	0	0	52.9136	1158	MD11G1237500
MD11G1239700_1	Chr11:34843207|34844571	0	0	0	0	188.403	431	MD11G1239700
MD11G1239900_1	Chr11:34854212|34854405	0	0	0	0	317.482	193	MD11G1239900
MD11G1246700_1	Chr11:35860087|35861258	0	0	0	0	55.104	1081	MD11G1246700
MD11G1247500_1	Chr11:35921159|35922212	0	0	0	0	154.23	1053	MD11G1247500
MD11G1042000_1	Chr11:3600074|3601030	0	0	0	0	139.048	661	MD11G1042000
n/a_1289	Chr11:36817998|36818338	0	0	0	0	270.326	340	n/a
n/a_1290	Chr11:36817998|36818887	0	0	0	0	67.005	889	n/a
MD11G1257600_1	Chr11:36988785|36989461	0	0	0	0	188.342	488	MD11G1257600
MD11G1258100_1	Chr11:37068900|37072117	0	0	0	0	56.6798	2132	MD11G1258100
MD11G1258100_3	Chr11:37071536|37072117	0	0	0	0	2533.89	399	MD11G1258100
MD11G1259300_1	Chr11:37366006|37366329	0	0	0	0	251.399	323	MD11G1259300
n/a_1291	Chr11:37737860|37743964	0	0	0	0	9.75876	6104	n/a
MD11G1265500_1	Chr11:38082160|38083204	0	0	0	0	100.113	595	MD11G1265500
MD11G1273000_1	Chr11:38979191|38979782	0	0	0	0	201.582	591	MD11G1273000
n/a_1299	Chr11:39291543|39301161	0	0	0	0	12.7415	9618	n/a
MD11G1280500_1	Chr11:39831764|39832519	0	0	0	0	462.25	527	MD11G1280500
MD11G1282700_1	Chr11:40111676|40111872	0	0	0	0	920.454	196	MD11G1282700
MD11G1282800_1	Chr11:40118680|40118842	0	0	0	0	501.246	162	MD11G1282800
MD11G1284200_1	Chr11:40215541|40217820	0	0	0	0	88.164	695	MD11G1284200
n/a_1307	Chr11:41262269|41273109	0	0	0	0	274.225	10840	n/a
MD11G1293300_1	Chr11:41265272|41266529	0	0	0	0	105.992	562	MD11G1293300
MD11G1293300_2	Chr11:41267478|41268566	0	0	0	0	102.294	599	MD11G1293300
n/a_1308	Chr11:41417381|41417635	0	0	0	0	319.692	254	n/a
MD11G1301800_1	Chr11:41743296|41743447	0	0	0	0	537.761	151	MD11G1301800
MD11G1303900_1	Chr11:41901545|41901748	0	0	0	0	293.436	203	MD11G1303900
MD11G1307000_1	Chr11:42120566|42120758	0	0	0	0	465.371	192	MD11G1307000
n/a_1326	Chr11:42586499|42586673	0	0	0	0	466.677	174	n/a
MD11G1059400_1	Chr11:5069479|5069816	0	0	0	0	387.81	158	MD11G1059400
n/a_1223	Chr11:5440178|5450179	0	0	0	0	9.19017	10001	n/a
n/a_1224	Chr11:5519296|5544846	0	0	0	0	4.7964	25550	n/a
n/a_1225	Chr11:5521319|5554909	0	0	0	0	199.875	33590	n/a
MD11G1069900_1	Chr11:5978867|5979087	0	0	0	0	417.777	220	MD11G1069900
MD11G1070800_1	Chr11:6059191|6060686	0	0	0	0	92.6962	876	MD11G1070800
MD11G1085800_1	Chr11:7238357|7239856	0	0	0	0	42.2764	1409	MD11G1085800
n/a_1253	Chr11:7789523|7793712	0	0	0	0	263.292	4189	n/a
n/a_1256	Chr11:7968611|7969410	0	0	0	0	101.629	799	n/a
n/a_1259	Chr11:9006403|9007090	0	0	0	0	86.7067	687	n/a
MD12G1011500_1	Chr12:1189685|1189963	0	0	0	0	991.845	278	MD12G1011500
MD12G1093800_2	Chr12:12383382|12385692	0	0	0	0	183.455	334	MD12G1093800
MD12G1094500_1	Chr12:12480851|12484279	0	0	0	0	61.728	965	MD12G1094500
MD12G1014100_1	Chr12:1460669|1461700	0	0	0	0	100.622	807	MD12G1014100
MD12G1096900_2	Chr12:15263190|15263914	0	0	0	0	158.847	375	MD12G1096900
MD12G1015000_1	Chr12:1542328|1542769	0	0	0	0	138.943	441	MD12G1015000
MD12G1015000_2	Chr12:1542426|1542591	0	0	0	0	738.199	165	MD12G1015000
MD12G1015000_3	Chr12:1545748|1545999	0	0	0	0	355.981	251	MD12G1015000
MD12G1099800_1	Chr12:15559360|15559717	0	0	0	0	506.396	242	MD12G1099800
MD12G1101800_1	Chr12:15976648|15976806	0	0	0	0	754.019	158	MD12G1101800
MD12G1104900_1	Chr12:16526689|16528522	0	0	0	0	198.053	410	MD12G1104900
MD12G1018100_2	Chr12:1733870|1734553	0	0	0	0	170.205	360	MD12G1018100
MD12G1110100_1	Chr12:17411408|17412326	0	0	0	0	73.2942	836	MD12G1110100
MD12G1111300_1	Chr12:17669084|17669266	0	0	0	0	673.34	182	MD12G1111300
MD12G1111300_2	Chr12:17669084|17669290	0	0	0	0	591.276	206	MD12G1111300
MD12G1114300_1	Chr12:18212109|18212286	0	0	0	0	504.809	177	MD12G1114300
MD12G1115300_1	Chr12:18378662|18380422	0	0	0	0	121.742	667	MD12G1115300
MD12G1120400_1	Chr12:19283591|19284033	0	0	0	0	811.576	151	MD12G1120400
MD12G1120600_1	Chr12:19329460|19329688	0	0	0	0	268.745	228	MD12G1120600
MD12G1120600_4	Chr12:19329913|19330141	0	0	0	0	268.745	228	MD12G1120600
MD12G1125800_3	Chr12:20112283|20113565	0	0	0	0	61.7681	992	MD12G1125800
MD12G1020600_1	Chr12:2048508|2051069	0	0	0	0	100.249	810	MD12G1020600
MD12G1131700_1	Chr12:20679517|20680034	0	0	0	0	157.064	517	MD12G1131700
MD12G1132900_1	Chr12:20847404|20847607	0	0	0	0	301.842	203	MD12G1132900
MD12G1136400_1	Chr12:21311716|21312104	0	0	0	0	341.035	262	MD12G1136400
MD12G1141500_1	Chr12:22000015|22000195	0	0	0	0	496.396	180	MD12G1141500
MD12G1141500_5	Chr12:22000041|22000304	0	0	0	0	226.492	263	MD12G1141500
MD12G1141500_6	Chr12:22000041|22000311	0	0	0	0	220.62	270	MD12G1141500
MD12G1142100_1	Chr12:22041396|22046151	0	0	0	0	15.2346	3910	MD12G1142100
MD12G1143300_2	Chr12:22254006|22254335	0	0	0	0	185.679	330	MD12G1143300
n/a_1375	Chr12:22508975|22516220	0	0	0	0	80.1397	7245	n/a
n/a_1378	Chr12:23042036|23051140	0	0	0	0	74.7782	9104	n/a
MD12G1155600_1	Chr12:23629477|23629709	0	0	0	0	256.756	232	MD12G1155600
MD12G1158700_1	Chr12:23913202|23913406	0	0	0	0	291.997	204	MD12G1158700
MD12G1159000_1	Chr12:23929449|23930570	0	0	0	0	130.63	456	MD12G1159000
MD12G1159600_1	Chr12:23952767|23953905	0	0	0	0	52.298	1139	MD12G1159600
MD12G1181400_1	Chr12:26116736|26124258	0	0	0	0	415.868	898	MD12G1181400
MD12G1183300_1	Chr12:26343815|26344181	0	0	0	0	162.753	366	MD12G1183300
MD12G1184100_2	Chr12:26420151|26422569	0	0	0	0	218.285	372	MD12G1184100
MD12G1025200_1	Chr12:2694836|2695578	0	0	0	0	141.838	432	MD12G1025200
n/a_1395	Chr12:28013198|28021460	0	0	0	0	1971.25	8262	n/a
MD12G1206600_1	Chr12:28699195|28700120	0	0	0	0	226.821	358	MD12G1206600
MD12G1206600_3	Chr12:28700089|28700418	0	0	0	0	186.243	329	MD12G1206600
MD12G1206900_1	Chr12:28714615|28716377	0	0	0	0	72.4665	822	MD12G1206900
MD12G1208700_1	Chr12:28802548|28802926	0	0	0	0	214.82	378	MD12G1208700
MD12G1220300_1	Chr12:29720248|29721317	0	0	0	0	132.079	451	MD12G1220300
MD12G1224200_2	Chr12:30048958|30050531	0	0	0	0	166.856	714	MD12G1224200
MD12G1227700_1	Chr12:30324138|30329211	0	0	0	0	303.173	1000	MD12G1227700
MD12G1230200_1	Chr12:30515192|30515354	0	0	0	0	367.7	162	MD12G1230200
MD12G1234000_1	Chr12:30952799|30953454	0	0	0	0	134.079	457	MD12G1234000
n/a_1419	Chr12:31188463|31194285	0	0	0	0	173.655	5822	n/a
n/a_1420	Chr12:31188934|31194835	0	0	0	0	70.6613	5901	n/a
n/a_1424	Chr12:31195252|31210010	0	0	0	0	110.426	14758	n/a
n/a_1430	Chr12:31807075|31859335	0	0	0	0	1.75872	52260	n/a
MD12G1249600_1	Chr12:31899955|31900461	0	0	0	0	186.732	319	MD12G1249600
MD12G1252000_2	Chr12:32134443|32137431	0	0	0	0	66.028	1392	MD12G1252000
n/a_1434	Chr12:32230348|32252920	0	0	0	0	15.1119	22572	n/a
n/a_1436	Chr12:32232526|32256815	0	0	0	0	8.58356	24289	n/a
n/a_1444	Chr12:32343028|32352450	0	0	0	0	6.50329	9422	n/a
MD12G1257000_1	Chr12:32444653|32448213	0	0	0	0	39.0032	1571	MD12G1257000
MD12G1258300_1	Chr12:32523935|32524465	0	0	0	0	349.139	351	MD12G1258300
MD12G1258400_1	Chr12:32530042|32531987	0	0	0	0	97.7584	914	MD12G1258400
MD12G1258400_2	Chr12:32530681|32531487	0	0	0	0	143.499	427	MD12G1258400
MD12G1263100_1	Chr12:32962176|32963717	0	0	0	0	339.738	263	MD12G1263100
MD12G1031800_1	Chr12:3482714|3483934	0	0	0	0	332.108	369	MD12G1031800
MD12G1043000_1	Chr12:4815715|4816399	0	0	0	0	87.0869	684	MD12G1043000
MD12G1045400_1	Chr12:5071278|5071747	0	0	0	0	159.568	384	MD12G1045400
MD12G1054100_1	Chr12:6102895|6104021	0	0	0	0	105.282	582	MD12G1054100
MD12G1057800_1	Chr12:6599332|6599501	0	0	0	0	891.273	169	MD12G1057800
MD13G1136900_1	Chr13:10528746|10528959	0	0	0	0	279.659	213	MD13G1136900
MD13G1136900_2	Chr13:10528956|10529106	0	0	0	0	812.019	150	MD13G1136900
MD13G1149400_1	Chr13:11732646|11734131	0	0	0	0	91.7275	668	MD13G1149400
MD13G1156500_1	Chr13:12190888|12193741	0	0	0	0	93.4054	656	MD13G1156500
MD13G1156900_1	Chr13:12241986|12243141	0	0	0	0	225.979	539	MD13G1156900
MD13G1172500_1	Chr13:14147398|14148126	0	0	0	0	353.052	345	MD13G1172500
MD13G1180700_1	Chr13:15049017|15050829	0	0	0	0	232.893	523	MD13G1180700
MD13G1182500_1	Chr13:15283883|15284388	0	0	0	0	393.229	413	MD13G1182500
MD13G1185200_1	Chr13:15768507|15768686	0	0	0	0	332.779	179	MD13G1185200
MD13G1188200_1	Chr13:16004614|16005034	0	0	0	0	283.655	420	MD13G1188200
MD13G1193800_1	Chr13:16777291|16777455	0	0	0	0	742.7	164	MD13G1193800
MD13G1194400_1	Chr13:16829601|16829871	0	0	0	0	441.241	270	MD13G1194400
MD13G1199600_1	Chr13:17732728|17735095	0	0	0	0	192.421	633	MD13G1199600
n/a_1481	Chr13:18830307|18832042	0	0	0	0	34.3328	1735	n/a
MD13G1027300_2	Chr13:1970468|1971515	0	0	0	0	134.887	602	MD13G1027300
MD13G1215700_1	Chr13:20452571|20454437	0	0	0	0	137.591	1336	MD13G1215700
MD13G1233600_1	Chr13:23330767|23331093	0	0	0	0	187.957	326	MD13G1233600
MD13G1238400_2	Chr13:24220248|24220402	0	0	0	0	397.883	154	MD13G1238400
MD13G1240300_1	Chr13:24880082|24880585	0	0	0	0	248.324	327	MD13G1240300
MD13G1241700_1	Chr13:25125220|25126550	0	0	0	0	134.107	1211	MD13G1241700
MD13G1249400_1	Chr13:26495448|26495646	0	0	0	0	309.464	198	MD13G1249400
MD13G1040100_1	Chr13:2732005|2732488	0	0	0	0	319.135	288	MD13G1040100
MD13G1046400_1	Chr13:3217599|3218350	0	0	0	0	105.429	565	MD13G1046400
MD13G1273200_1	Chr13:36973064|36973644	0	0	0	0	260.74	235	MD13G1273200
MD13G1279000_3	Chr13:39195757|39202184	0	0	0	0	168.12	1449	MD13G1279000
n/a_1456	Chr13:4016130|4017482	0	0	0	0	132.176	1352	n/a
MD13G1059000_1	Chr13:4113555|4113752	0	0	0	0	466.553	197	MD13G1059000
MD13G1059000_2	Chr13:4113582|4113786	0	0	0	0	729.994	204	MD13G1059000
MD13G1059000_3	Chr13:4113593|4113786	0	0	0	0	308.64	193	MD13G1059000
MD13G1283100_1	Chr13:41728232|41734726	0	0	0	0	79.1069	753	MD13G1283100
MD13G1283100_4	Chr13:41733287|41747501	0	0	0	0	204.699	873	MD13G1283100
MD13G1286000_1	Chr13:44230499|44235162	0	0	0	0	41.0527	1451	MD13G1286000
MD13G1074000_1	Chr13:5208540|5208725	0	0	0	0	321.986	185	MD13G1074000
MD13G1078600_1	Chr13:5520891|5522319	0	0	0	0	91.3628	1006	MD13G1078600
MD13G1078600_2	Chr13:5521963|5523555	0	0	0	0	116.935	786	MD13G1078600
MD13G1079900_1	Chr13:5606323|5607479	0	0	0	0	106.424	763	MD13G1079900
MD13G1082900_1	Chr13:5788400|5789857	0	0	0	0	191.228	623	MD13G1082900
MD13G1096700_1	Chr13:6840908|6841544	0	0	0	0	311.035	197	MD13G1096700
MD13G1097400_1	Chr13:6918495|6920220	0	0	0	0	82.0489	726	MD13G1097400
MD13G1106100_1	Chr13:7616811|7617898	0	0	0	0	144.061	638	MD13G1106100
MD13G1108000_1	Chr13:7741669|7743112	0	0	0	0	103.854	1180	MD13G1108000
MD13G1111300_1	Chr13:8084853|8085155	0	0	0	0	403.321	302	MD13G1111300
MD13G1111300_2	Chr13:8084946|8085343	0	0	0	0	150.044	397	MD13G1111300
MD13G1117700_1	Chr13:8585896|8587835	0	0	0	0	81.8077	749	MD13G1117700
MD13G1121400_1	Chr13:8942122|8942372	0	0	0	0	649.615	250	MD13G1121400
MD13G1121900_1	Chr13:8977763|8978420	0	0	0	0	206.832	288	MD13G1121900
MD13G1014300_1	Chr13:898989|899213	0	0	0	0	531.852	224	MD13G1014300
MD13G1014300_2	Chr13:899024|899213	0	0	0	0	324.201	189	MD13G1014300
MD13G1123000_1	Chr13:9124526|9124737	0	0	0	0	384.843	211	MD13G1123000
MD13G1125600_1	Chr13:9311724|9312544	0	0	0	0	207.789	729	MD13G1125600
MD13G1127000_1	Chr13:9505296|9505668	0	0	0	0	218.285	372	MD13G1127000
MD14G1010700_1	Chr14:1052236|1052439	0	0	0	0	400.009	203	MD14G1010700
MD14G1087500_4	Chr14:10917790|10921553	0	0	0	0	141.49	842	MD14G1087500
MD14G1087800_1	Chr14:10974478|10975410	0	0	0	0	662.872	490	MD14G1087800
MD14G1012300_1	Chr14:1143721|1144850	0	0	0	0	116.269	527	MD14G1012300
MD14G1090500_1	Chr14:11540189|11540343	0	0	0	0	527.285	154	MD14G1090500
MD14G1013400_1	Chr14:1195554|1195791	0	0	0	0	754.019	237	MD14G1013400
MD14G1015300_1	Chr14:1374270|1375291	0	0	0	0	130.34	623	MD14G1015300
MD14G1098000_1	Chr14:14931474|14931911	0	0	0	0	136.31	437	MD14G1098000
MD14G1102200_1	Chr14:15723852|15724033	0	0	0	0	338.53	181	MD14G1102200
MD14G1113000_2	Chr14:18235979|18238795	0	0	0	0	101.186	1605	MD14G1113000
MD14G1130300_1	Chr14:20792402|20792571	0	0	0	0	362.568	169	MD14G1130300
MD14G1134800_1	Chr14:21351773|21352039	0	0	0	0	230.353	266	MD14G1134800
MD14G1147500_1	Chr14:24026567|24027238	0	0	0	0	111.55	534	MD14G1147500
MD14G1148000_2	Chr14:24078234|24086165	0	0	0	0	86.4968	1033	MD14G1148000
MD14G1148000_3	Chr14:24079413|24086165	0	0	0	0	84.5158	725	MD14G1148000
MD14G1154200_3	Chr14:24870077|24870327	0	0	0	0	324.807	250	MD14G1154200
MD14G1159900_1	Chr14:25387405|25387567	0	0	0	0	567.351	162	MD14G1159900
n/a_1537	Chr14:25910985|25915682	0	0	0	0	19.568	4697	n/a
MD14G1165500_1	Chr14:25918304|25918631	0	0	0	0	187.382	327	MD14G1165500
MD14G1173000_1	Chr14:26710701|26710856	0	0	0	0	395.316	155	MD14G1173000
MD14G1183700_1	Chr14:27625705|27630129	0	0	0	0	19.6852	3026	MD14G1183700
MD14G1185600_1	Chr14:27781789|27782652	0	0	0	0	197.571	411	MD14G1185600
MD14G1191800_1	Chr14:28283851|28284973	0	0	0	0	92.6399	643	MD14G1191800
MD14G1192600_2	Chr14:28354779|28355607	0	0	0	0	241.653	493	MD14G1192600
MD14G1032100_3	Chr14:2877332|2879264	0	0	0	0	162.404	750	MD14G1032100
MD14G1198900_1	Chr14:28890733|28891024	0	0	0	0	279.044	291	MD14G1198900
MD14G1199800_2	Chr14:28910983|28911184	0	0	0	0	605.984	201	MD14G1199800
MD14G1203800_2	Chr14:29208824|29209854	0	0	0	0	150.55	407	MD14G1203800
n/a_1550	Chr14:29510605|29511810	0	0	0	0	49.4336	1205	n/a
MD14G1210400_1	Chr14:29608269|29610153	0	0	0	0	32.5233	1884	MD14G1210400
MD14G1213700_1	Chr14:29811779|29812274	0	0	0	0	410.11	495	MD14G1213700
MD14G1215600_1	Chr14:29923906|29924163	0	0	0	0	347.67	257	MD14G1215600
MD14G1217600_1	Chr14:30105416|30107657	0	0	0	0	78.4815	759	MD14G1217600
MD14G1218000_1	Chr14:30134480|30135381	0	0	0	0	542.737	424	MD14G1218000
MD14G1219500_1	Chr14:30193438|30193755	0	0	0	0	193.293	317	MD14G1219500
MD14G1219700_1	Chr14:30203974|30204794	0	0	0	0	96.0407	638	MD14G1219700
MD14G1225700_1	Chr14:30650883|30651461	0	0	0	0	106.01	578	MD14G1225700
MD14G1227800_1	Chr14:30879252|30880692	0	0	0	0	63.365	967	MD14G1227800
MD14G1231500_1	Chr14:31201593|31201821	0	0	0	0	356.149	228	MD14G1231500
MD14G1242800_1	Chr14:32115356|32118503	0	0	0	0	251.163	1423	MD14G1242800
MD14G1243900_2	Chr14:32232830|32233304	0	0	0	0	272.329	225	MD14G1243900
MD14G1064600_1	Chr14:6817400|6818468	0	0	0	0	83.6622	1068	MD14G1064600
MD14G1069700_1	Chr14:7665189|7665355	0	0	0	0	489.168	166	MD14G1069700
MD14G1076700_1	Chr14:8684322|8684735	0	0	0	0	148.363	413	MD14G1076700
MD15G1141000_1	Chr15:10405066|10405400	0	0	0	0	183.455	334	MD15G1141000
MD15G1142200_2	Chr15:10528813|10529741	0	0	0	0	190.292	322	MD15G1142200
MD15G1150600_1	Chr15:11111482|11112358	0	0	0	0	153.569	399	MD15G1150600
MD15G1153500_1	Chr15:11384007|11384219	0	0	0	0	289.028	212	MD15G1153500
MD15G1158400_1	Chr15:11769170|11769440	0	0	0	0	451.121	270	MD15G1158400
MD15G1002000_1	Chr15:117821|118377	0	0	0	0	384.163	319	MD15G1002000
MD15G1020900_1	Chr15:1211294|1212176	0	0	0	0	331.211	185	MD15G1020900
MD15G1164900_1	Chr15:12409074|12409407	0	0	0	0	243.849	333	MD15G1164900
MD15G1166400_1	Chr15:12491927|12495622	0	0	0	0	26.1261	2280	MD15G1166400
MD15G1168400_1	Chr15:12945931|12946804	0	0	0	0	152.923	531	MD15G1168400
MD15G1181200_1	Chr15:14384747|14385091	0	0	0	0	760.496	344	MD15G1181200
n/a_1601	Chr15:14469301|14469936	0	0	0	0	140.711	635	n/a
MD15G1187200_1	Chr15:14786810|14786982	0	0	0	0	346.323	172	MD15G1187200
n/a_1603	Chr15:14950153|14955561	0	0	0	0	11.0147	5408	n/a
MD15G1199500_1	Chr15:15873893|15874051	0	0	0	0	387.81	158	MD15G1199500
MD15G1200100_1	Chr15:15907117|15907639	0	0	0	0	117.383	522	MD15G1200100
MD15G1201900_2	Chr15:16063720|16065365	0	0	0	0	117.955	505	MD15G1201900
MD15G1212500_1	Chr15:17066514|17066690	0	0	0	0	348.148	176	MD15G1212500
MD15G1222000_1	Chr15:18009164|18009395	0	0	0	0	257.868	231	MD15G1222000
MD15G1223900_1	Chr15:18211399|18212023	0	0	0	0	289.162	309	MD15G1223900
MD15G1231000_1	Chr15:18907381|18909284	0	0	0	0	34.0222	1801	MD15G1231000
MD15G1237700_1	Chr15:19549883|19550390	0	0	0	0	222.007	414	MD15G1237700
MD15G1240100_1	Chr15:19760709|19763324	0	0	0	0	177.092	346	MD15G1240100
MD15G1242600_2	Chr15:19954906|19955336	0	0	0	0	323.736	184	MD15G1242600
n/a_1607	Chr15:20275683|20278537	0	0	0	0	21.4695	2854	n/a
MD15G1245500_1	Chr15:20276444|20276686	0	0	0	0	246.147	242	MD15G1245500
MD15G1249200_1	Chr15:20796997|20798411	0	0	0	0	74.157	1095	MD15G1249200
MD15G1249200_2	Chr15:20797501|20798630	0	0	0	0	59.0308	1038	MD15G1249200
MD15G1253900_1	Chr15:21424850|21425236	0	0	0	0	315.551	386	MD15G1253900
MD15G1253900_3	Chr15:21424977|21425135	0	0	0	0	770.904	158	MD15G1253900
MD15G1033000_2	Chr15:2312999|2313983	0	0	0	0	171.171	348	MD15G1033000
MD15G1003800_1	Chr15:233890|234111	0	0	0	0	277.258	221	MD15G1003800
MD15G1035000_1	Chr15:2472392|2472542	0	0	0	0	397.116	150	MD15G1035000
MD15G1283100_1	Chr15:25588386|25588559	0	0	0	0	531.277	173	MD15G1283100
MD15G1037200_1	Chr15:2587652|2588056	0	0	0	0	221.166	404	MD15G1037200
MD15G1294800_2	Chr15:27578215|27578694	0	0	0	0	169.226	352	MD15G1294800
MD15G1042400_1	Chr15:2959689|2960364	0	0	0	0	165.044	492	MD15G1042400
MD15G1042400_2	Chr15:2962516|2962873	0	0	0	0	171.636	357	MD15G1042400
MD15G1044900_1	Chr15:3067128|3067395	0	0	0	0	229.49	267	MD15G1044900
MD15G1309700_1	Chr15:31097338|31099439	0	0	0	0	83.3281	1103	MD15G1309700
MD15G1321600_1	Chr15:33677578|33677755	0	0	0	0	336.539	177	MD15G1321600
MD15G1323700_1	Chr15:34470906|34472454	0	0	0	0	101.279	605	MD15G1323700
MD15G1324300_2	Chr15:34529861|34530568	0	0	0	0	98.7852	603	MD15G1324300
MD15G1330400_1	Chr15:36457491|36458294	0	0	0	0	125.67	474	MD15G1330400
MD15G1332600_1	Chr15:36894328|36895090	0	0	0	0	78.1725	762	MD15G1332600
n/a_1619	Chr15:36970758|36970954	0	0	0	0	468.933	196	n/a
MD15G1333600_2	Chr15:37106083|37106905	0	0	0	0	74.5425	822	MD15G1333600
MD15G1333600_3	Chr15:37107912|37109550	0	0	0	0	49.5738	1638	MD15G1333600
MD15G1055100_1	Chr15:3734745|3736416	0	0	0	0	82.4683	743	MD15G1055100
MD15G1055400_2	Chr15:3744818|3745506	0	0	0	0	132.628	462	MD15G1055400
MD15G1335500_1	Chr15:37489875|37490575	0	0	0	0	325.505	366	MD15G1335500
n/a_1621	Chr15:37593355|37601680	0	0	0	0	7.15525	8325	n/a
MD15G1336300_1	Chr15:37659653|37661076	0	0	0	0	84.2833	727	MD15G1336300
MD15G1336800_1	Chr15:37780873|37781089	0	0	0	0	375.935	216	MD15G1336800
n/a_1622	Chr15:41249981|41329918	0	0	0	0	1.14979	79937	n/a
n/a_1625	Chr15:41330444|41345420	0	0	0	0	5.42213	14976	n/a
MD15G1356600_1	Chr15:42989013|42989434	0	0	0	0	192.421	422	MD15G1356600
MD15G1063600_1	Chr15:4375054|4376785	0	0	0	0	201.03	762	MD15G1063600
MD15G1064400_1	Chr15:4478439|4478945	0	0	0	0	151.294	405	MD15G1064400
MD15G1379900_1	Chr15:46736125|46736339	0	0	0	0	286.327	214	MD15G1379900
MD15G1386100_1	Chr15:47722403|47722600	0	0	0	0	622.071	197	MD15G1386100
MD15G1387600_1	Chr15:47932262|47939314	0	0	0	0	48.906	1218	MD15G1387600
MD15G1390500_1	Chr15:48498503|48498728	0	0	0	0	264.744	225	MD15G1390500
MD15G1071000_1	Chr15:4852749|4853990	0	0	0	0	136.569	673	MD15G1071000
n/a_1635	Chr15:50187619|50188474	0	0	0	0	189.946	855	n/a
n/a_1636	Chr15:50232609|50268320	0	0	0	0	9.09545	35711	n/a
n/a_1641	Chr15:50776382|50776571	0	0	0	0	472.758	189	n/a
MD15G1412900_1	Chr15:51237943|51239332	0	0	0	0	92.3527	645	MD15G1412900
n/a_1646	Chr15:51275902|51276075	0	0	0	0	860.802	173	n/a
n/a_1647	Chr15:51560850|51631681	0	0	0	0	0.865073	70831	n/a
n/a_1651	Chr15:52262904|52275124	0	0	0	0	169.45	12220	n/a
MD15G1434000_1	Chr15:53432802|53432966	0	0	0	0	495.133	164	MD15G1434000
MD15G1078300_1	Chr15:5344207|5344660	0	0	0	0	179.254	453	MD15G1078300
MD15G1435000_1	Chr15:53513416|53513577	0	0	0	0	501.246	162	MD15G1435000
n/a_1665	Chr15:53637329|53641856	0	0	0	0	419.592	4527	n/a
MD15G1440000_2	Chr15:53997077|53998551	0	0	0	0	154.342	397	MD15G1440000
n/a_1666	Chr15:54024574|54027345	0	0	0	0	1240.62	2771	n/a
MD15G1440400_1	Chr15:54033990|54034281	0	0	0	0	279.044	291	MD15G1440400
n/a_1670	Chr15:54098553|54100383	0	0	0	0	32.5505	1830	n/a
MD15G1442600_1	Chr15:54284629|54285488	0	0	0	0	419.685	146	MD15G1442600
MD15G1446000_2	Chr15:54922225|54922810	0	0	0	0	269.336	455	MD15G1446000
MD15G1010200_1	Chr15:549506|550772	0	0	0	0	124.541	492	MD15G1010200
MD15G1096900_2	Chr15:6764492|6765301	0	0	0	0	385.757	421	MD15G1096900
MD15G1014100_1	Chr15:788829|788997	0	0	0	0	354.568	168	MD15G1014100
n/a_1580	Chr15:7899168|7899351	0	0	0	0	325.505	183	n/a
MD15G1113500_2	Chr15:7981652|7983619	0	0	0	0	73.2687	813	MD15G1113500
MD15G1120600_1	Chr15:8679138|8681300	0	0	0	0	65.3938	937	MD15G1120600
MD15G1015100_1	Chr15:889087|889364	0	0	0	0	215.045	277	MD15G1015100
MD15G1130800_4	Chr15:9444441|9444831	0	0	0	0	291.781	315	MD15G1130800
MD15G1133200_1	Chr15:9660968|9661157	0	0	0	0	315.172	189	MD15G1133200
MD15G1134700_1	Chr15:9785171|9788429	0	0	0	0	560.98	579	MD15G1134700
n/a_1588	Chr15:9844670|9876347	0	0	0	0	6.58163	31677	n/a
MD16G1131000_1	Chr16:10017289|10017477	0	0	0	0	647.887	188	MD16G1131000
MD16G1132300_1	Chr16:10088515|10088686	0	0	0	0	537.491	171	MD16G1132300
MD16G1132300_2	Chr16:10088515|10088725	0	0	0	0	1739.01	210	MD16G1132300
MD16G1132300_3	Chr16:10088515|10088836	0	0	0	0	190.885	321	MD16G1132300
MD16G1014000_1	Chr16:1073865|1074042	0	0	0	0	458.768	177	MD16G1014000
MD16G1145300_1	Chr16:11282291|11282937	0	0	0	0	240.955	337	MD16G1145300
n/a_1710	Chr16:11296515|11372926	0	0	0	0	7.79567	76411	n/a
n/a_1713	Chr16:11542773|11549164	0	0	0	0	116.507	6391	n/a
MD16G1149700_1	Chr16:11800819|11801636	0	0	0	0	725.396	306	MD16G1149700
MD16G1150700_1	Chr16:11890299|11890794	0	0	0	0	196.592	303	MD16G1150700
MD16G1154000_1	Chr16:12226297|12226634	0	0	0	0	928.75	239	MD16G1154000
MD16G1155500_1	Chr16:12326477|12327049	0	0	0	0	160.683	572	MD16G1155500
MD16G1016800_1	Chr16:1252935|1253565	0	0	0	0	128.892	630	MD16G1016800
MD16G1157500_1	Chr16:12605463|12607501	0	0	0	0	93.0147	873	MD16G1157500
MD16G1159100_1	Chr16:12852513|12852713	0	0	0	0	297.837	200	MD16G1159100
MD16G1159500_1	Chr16:12928081|12928867	0	0	0	0	157.517	389	MD16G1159500
MD16G1162200_1	Chr16:13244732|13246832	0	0	0	0	125.797	1291	MD16G1162200
n/a_1718	Chr16:13245533|13248940	0	0	0	0	26.2258	3407	n/a
MD16G1162700_1	Chr16:13276404|13276555	0	0	0	0	608.682	151	MD16G1162700
MD16G1018300_1	Chr16:1336843|1337389	0	0	0	0	162.1	378	MD16G1018300
MD16G1169000_1	Chr16:14054054|14054330	0	0	0	0	735.524	276	MD16G1169000
n/a_1673	Chr16:1431371|1441043	0	0	0	0	76.0223	9672	n/a
MD16G1173900_1	Chr16:14673417|14674886	0	0	0	0	65.5336	935	MD16G1173900
MD16G1176100_1	Chr16:14959080|14959277	0	0	0	0	412.192	197	MD16G1176100
MD16G1176100_2	Chr16:14959080|14959668	0	0	0	0	156.311	588	MD16G1176100
MD16G1176400_1	Chr16:15007941|15008104	0	0	0	0	375.914	163	MD16G1176400
MD16G1176700_1	Chr16:15042804|15043232	0	0	0	0	254.562	351	MD16G1176700
n/a_1725	Chr16:15626891|15631408	0	0	0	0	128.869	4517	n/a
MD16G1022800_1	Chr16:1672809|1673263	0	0	0	0	309.464	198	MD16G1022800
MD16G1191200_3	Chr16:16743277|16743689	0	0	0	0	444.361	412	MD16G1191200
MD16G1193400_1	Chr16:17159249|17159531	0	0	0	0	211.232	282	MD16G1193400
MD16G1193900_1	Chr16:17203606|17203767	0	0	0	0	380.584	161	MD16G1193900
n/a_1674	Chr16:1771744|1829401	0	0	0	0	8706.54	57657	n/a
MD16G1202600_1	Chr16:18440972|18441179	0	0	0	0	431.648	207	MD16G1202600
MD16G1206200_1	Chr16:19074242|19074722	0	0	0	0	316.371	385	MD16G1206200
MD16G1212500_1	Chr16:20187782|20187944	0	0	0	0	378.234	162	MD16G1212500
MD16G1212600_1	Chr16:20191115|20191790	0	0	0	0	90.7762	675	MD16G1212600
MD16G1213000_1	Chr16:20466419|20466596	0	0	0	0	346.181	177	MD16G1213000
MD16G1220700_1	Chr16:22047395|22048325	0	0	0	0	131.772	930	MD16G1220700
MD16G1003900_1	Chr16:221654|222650	0	0	0	0	88.8423	914	MD16G1003900
MD16G1225900_1	Chr16:22851824|22853777	0	0	0	0	194.665	612	MD16G1225900
MD16G1239300_1	Chr16:25298196|25298436	0	0	0	0	338.341	240	MD16G1239300
MD16G1239500_1	Chr16:25398340|25399021	0	0	0	0	89.9764	681	MD16G1239500
MD16G1242400_1	Chr16:26238657|26238822	0	0	0	0	371.357	165	MD16G1242400
MD16G1242600_1	Chr16:26250461|26250658	0	0	0	0	412.192	197	MD16G1242600
MD16G1249500_1	Chr16:27874430|27875394	0	0	0	0	131.821	616	MD16G1249500
MD16G1250100_1	Chr16:28023479|28024668	0	0	0	0	84.0557	1063	MD16G1250100
MD16G1251600_1	Chr16:28178588|28178837	0	0	0	0	246.08	249	MD16G1251600
MD16G1255400_1	Chr16:29363325|29364786	0	0	0	0	164.715	372	MD16G1255400
MD16G1042400_1	Chr16:3004292|3004454	0	0	0	0	378.234	162	MD16G1042400
MD16G1258400_1	Chr16:30399193|30401333	0	0	0	0	78.0701	763	MD16G1258400
MD16G1258600_2	Chr16:31263196|31263877	0	0	0	0	160.478	506	MD16G1258600
MD16G1258600_3	Chr16:31263196|31263880	0	0	0	0	117.028	509	MD16G1258600
MD16G1260800_1	Chr16:32219927|32221087	0	0	0	0	113.888	713	MD16G1260800
MD16G1276300_1	Chr16:37275846|37276235	0	0	0	0	157.517	389	MD16G1276300
MD16G1282700_2	Chr16:38705760|38706006	0	0	0	0	484.288	246	MD16G1282700
Apple_newGene_17957_1	Chr16:38914883|38918997	0	0	0	0	29.6069	4114	Apple_newGene_17957
Apple_newGene_17957_4	Chr16:38915015|38918997	0	0	0	0	30.5883	3982	Apple_newGene_17957
Apple_newGene_17957_5	Chr16:38918636|38918801	0	0	0	0	738.199	165	Apple_newGene_17957
Apple_newGene_17957_6	Chr16:38918699|38918975	0	0	0	0	294.21	276	Apple_newGene_17957
Apple_newGene_17957_7	Chr16:38918788|38919107	0	0	0	0	254.551	319	Apple_newGene_17957
n/a_1685	Chr16:3991238|3995176	0	0	0	0	41.2402	3938	n/a
MD16G1073500_1	Chr16:5157710|5158945	0	0	0	0	100.113	595	MD16G1073500
MD16G1073500_2	Chr16:5158557|5159967	0	0	0	0	140.245	1158	MD16G1073500
MD16G1078400_1	Chr16:5503031|5503522	0	0	0	0	121.319	491	MD16G1078400
n/a_1689	Chr16:5526813|5531416	0	0	0	0	12.941	4603	n/a
MD16G1000900_1	Chr16:57593|58697	0	0	0	0	139.895	657	MD16G1000900
MD16G1082100_1	Chr16:5768561|5770735	0	0	0	0	160.764	1334	MD16G1082100
MD16G1008000_1	Chr16:593576|594357	0	0	0	0	177.813	335	MD16G1008000
MD16G1089100_1	Chr16:6161560|6162159	0	0	0	0	161.757	502	MD16G1089100
MD16G1094400_1	Chr16:6534368|6534527	0	0	0	0	374.638	159	MD16G1094400
n/a_1698	Chr16:6548104|6551169	0	0	0	0	139.941	3065	n/a
MD16G1009800_1	Chr16:766223|767463	0	0	0	0	95.7569	848	MD16G1009800
MD16G1117400_1	Chr16:8332631|8333737	0	0	0	0	295.638	412	MD16G1117400
MD16G1001500_1	Chr16:90840|93777	0	0	0	0	101.305	588	MD16G1001500
MD16G1126800_1	Chr16:9228100|9228280	0	0	0	0	340.411	180	MD16G1126800
MD17G1122400_1	Chr17:10635633|10636600	0	0	0	0	159.271	561	MD17G1122400
MD17G1123900_1	Chr17:10765328|10767861	0	0	0	0	58.7568	1382	MD17G1123900
MD17G1124000_1	Chr17:10776108|10776361	0	0	0	0	470.889	253	MD17G1124000
MD17G1013000_1	Chr17:1121200|1121496	0	0	0	0	261.855	234	MD17G1013000
MD17G1134800_1	Chr17:12081477|12081687	0	0	0	0	386.676	210	MD17G1134800
MD17G1134800_2	Chr17:12081688|12082012	0	0	0	0	183.85	324	MD17G1134800
MD17G1134800_3	Chr17:12082024|12082775	0	0	0	0	150.181	408	MD17G1134800
MD17G1138200_1	Chr17:12422597|12423061	0	0	0	0	132.056	464	MD17G1138200
MD17G1139600_2	Chr17:12555436|12555793	0	0	0	0	257.454	357	MD17G1139600
MD17G1142100_1	Chr17:12808486|12809790	0	0	0	0	98.1954	624	MD17G1142100
MD17G1145400_1	Chr17:13122528|13123489	0	0	0	0	119.944	677	MD17G1145400
MD17G1152400_2	Chr17:14094923|14095077	0	0	0	0	386.802	154	MD17G1152400
n/a_1804	Chr17:14151579|14151746	0	0	0	0	366.91	167	n/a
MD17G1018500_1	Chr17:1447793|1449523	0	0	0	0	72.6433	820	MD17G1018500
MD17G1161500_1	Chr17:15915383|15917183	0	0	0	0	79.2213	1025	MD17G1161500
MD17G1162700_1	Chr17:16106667|16108306	0	0	0	0	77.3661	792	MD17G1162700
MD17G1163300_1	Chr17:16155704|16158200	0	0	0	0	161.247	760	MD17G1163300
MD17G1165500_1	Chr17:16435082|16435239	0	0	0	0	780.56	157	MD17G1165500
MD17G1027400_6	Chr17:1965921|1967774	0	0	0	0	39.7912	1497	MD17G1027400
MD17G1027400_11	Chr17:1972361|1972540	0	0	0	0	831.948	179	MD17G1027400
n/a_1761	Chr17:1979035|1995484	0	0	0	0	7.40488	16449	n/a
n/a_1807	Chr17:21002715|21032869	0	0	0	0	4.06407	30154	n/a
MD17G1188900_3	Chr17:22522715|22524607	0	0	0	0	524.828	694	MD17G1188900
MD17G1191600_1	Chr17:22816600|22817712	0	0	0	0	57.4421	1037	MD17G1191600
MD17G1204600_1	Chr17:24774049|24777471	0	0	0	0	78.6889	757	MD17G1204600
MD17G1207100_1	Chr17:25004207|25006463	0	0	0	0	99.3555	1434	MD17G1207100
n/a_1811	Chr17:25117431|25119086	0	0	0	0	49.0646	1655	n/a
MD17G1213100_1	Chr17:26020793|26021078	0	0	0	0	284.919	285	MD17G1213100
MD17G1216300_1	Chr17:26308571|26310903	0	0	0	0	66.8879	1821	MD17G1216300
MD17G1217000_1	Chr17:26385509|26387907	0	0	0	0	186.671	435	MD17G1217000
MD17G1218700_1	Chr17:26593753|26593924	0	0	0	0	348.348	171	MD17G1218700
MD17G1230800_2	Chr17:27928428|27929805	0	0	0	0	51.6183	1154	MD17G1230800
n/a_1815	Chr17:28027763|28083406	0	0	0	0	64.2318	55643	n/a
MD17G1243900_1	Chr17:29244821|29246059	0	0	0	0	98.5112	622	MD17G1243900
MD17G1265800_1	Chr17:32633857|32633989	0	0	0	0	615.166	132	MD17G1265800
n/a_1836	Chr17:33436029|33436180	0	0	0	0	405.788	151	n/a
n/a_1841	Chr17:33634062|33664097	0	0	0	0	2.04009	30035	n/a
MD17G1275400_1	Chr17:33665242|33665443	0	0	0	0	444.533	201	MD17G1275400
MD17G1278200_1	Chr17:33818731|33819622	0	0	0	0	365.226	667	MD17G1278200
MD17G1285700_1	Chr17:34476216|34476592	0	0	0	0	257.454	238	MD17G1285700
n/a_1764	Chr17:3477303|3497377	0	0	0	0	12.1354	20074	n/a
MD17G1049800_1	Chr17:3679192|3679423	0	0	0	0	265.255	231	MD17G1049800
MD17G1051900_1	Chr17:4084545|4084713	0	0	0	0	354.568	168	MD17G1051900
n/a_1765	Chr17:4795823|4805030	0	0	0	0	6.4698	9207	n/a
n/a_1771	Chr17:5113052|5184823	0	0	0	0	2.83889	71771	n/a
MD17G1010000_2	Chr17:619940|622028	0	0	0	0	40.5806	2001	MD17G1010000
MD17G1088400_1	Chr17:7264800|7265038	0	0	0	0	514.907	238	MD17G1088400
MD17G1098900_1	Chr17:8398550|8399085	0	0	0	0	138.208	431	MD17G1098900
n/a_1781	Chr17:8455803|8470841	0	0	0	0	10.7996	15038	n/a
MD17G1099800_1	Chr17:8472040|8472205	0	0	0	0	1702.05	72	MD17G1099800
MD17G1105300_1	Chr17:8939758|8940330	0	0	0	0	141.961	572	MD17G1105300
n/a_1788	Chr17:9641981|9642131	0	0	0	0	541.346	150	n/a
MD17G1112600_1	Chr17:9644071|9645197	0	0	0	0	97.0548	947	MD17G1112600
