# Supplementary material for: Expression Characteristics in Roots, Phloem, Leaves, Flowers and Fruits of Apple circRNA
Source: Genes (Basel). 2022 Apr 18;13(4):712. doi: 10.3390/genes13040712 (PMC9030095; doi:10.3390/genes13040712)
Supplement: Supplementary file 1 [file genes-13-00712-s001.zip › Table S8.xlsx]

## Sheet: Sheet1
Table S8 Functional annotation of host-genes of circRNAs
#GeneID	COG_class	COG_class_annotation	GO_annotation	KEGG_annotation	KOG_class	KOG_class_annotation	Swissprot_annotation	eggNOG_class	eggNOG_class_annotation	nr_annotation
MD03G1205600	[GEPR]	--	--	--	--	--	Probable folate-biopterin transporter 4 OS=Arabidopsis thaliana GN=At5g54860 PE=2 SV=1	G	Carbohydrate transport and metabolism	PREDICTED: probable folate-biopterin transporter 4 [Malus domestica]
MD03G1234000	--	--	--	--	[A]	RNA processing and modification	--	S	Function unknown	PREDICTED: protein N-lysine methyltransferase METTL21A-like [Malus domestica]
MD15G1158500	--	--	--	K17569|0|mdm:103400027|uncharacterized LOC103400027; K17569 G patch domain-containing protein 2 (A)	[A]	RNA processing and modification	Septin and tuftelin-interacting protein 1 homolog 1 OS=Arabidopsis thaliana GN=STIPL1 PE=1 SV=1	S	Function unknown	PREDICTED: uncharacterized protein LOC103400027 [Malus domestica]
MD12G1115300	[RTKL]	--	Molecular Function: protein kinase activity (GO:0004672);; Molecular Function: ATP binding (GO:0005524);; Biological Process: protein phosphorylation (GO:0006468);;	--	[T]	Signal transduction mechanisms	Probable serine/threonine-protein kinase PIX7 OS=Arabidopsis thaliana GN=PIX7 PE=1 SV=1	T	Signal transduction mechanisms	PREDICTED: probable receptor-like protein kinase At5g47070 [Pyrus x bretschneideri]
MD10G1081300	--	--	Molecular Function: dolichyl-diphosphooligosaccharide-protein glycotransferase activity (GO:0004579);; Cellular Component: endoplasmic reticulum membrane (GO:0005789);; Biological Process: protein N-linked glycosylation via asparagine (GO:0018279);;	K12670|0|mdm:103413622|dolichyl-diphosphooligosaccharide--protein glycosyltransferase 48 kDa subunit-like; K12670 oligosaccharyltransferase complex subunit beta (A)	[O]	Posttranslational modification, protein turnover, chaperones	Dolichyl-diphosphooligosaccharide--protein glycosyltransferase 48 kDa subunit OS=Oryza sativa subsp. japonica GN=OST48 PE=2 SV=1	S	Function unknown	PREDICTED: dolichyl-diphosphooligosaccharide--protein glycosyltransferase 48 kDa subunit-like [Malus domestica]
MD05G1122100	[CHR]	--	Molecular Function: glycerate dehydrogenase activity (GO:0008465);; Molecular Function: NAD binding (GO:0051287);; Biological Process: oxidation-reduction process (GO:0055114);;	K15893|0|mdm:103420047|glycerate dehydrogenase; K15893 hydroxypyruvate reductase 1 (A)	[C]	Energy production and conversion	Glycerate dehydrogenase HPR, peroxisomal OS=Arabidopsis thaliana GN=HPR PE=1 SV=1	C	Energy production and conversion	PREDICTED: glycerate dehydrogenase [Malus domestica]
MD17G1142100	[T]	Signal transduction mechanisms	Molecular Function: phosphoprotein phosphatase activity (GO:0004721);; Cellular Component: nucleus (GO:0005634);; Cellular Component: cytoplasm (GO:0005737);; Biological Process: protein dephosphorylation (GO:0006470);; Molecular Function: metal ion binding (GO:0046872);;	K04460|0|mdm:103405195|serine/threonine-protein phosphatase 5-like; K04460 serine/threonine-protein phosphatase 5 [EC:3.1.3.16] (A)	[R]	General function prediction only	Serine/threonine-protein phosphatase 5 OS=Arabidopsis thaliana GN=PAPP5 PE=1 SV=1	T	Signal transduction mechanisms	PREDICTED: serine/threonine-protein phosphatase 5-like isoform X2 [Malus domestica]
MD05G1127100	[H]	Coenzyme transport and metabolism	Biological Process: isoprenoid biosynthetic process (GO:0008299);; Molecular Function: transferase activity (GO:0016740);; Molecular Function: 2-alkenal reductase [NAD(P)] activity (GO:0032440);; Biological Process: oxidation-reduction process (GO:0055114);;	K13789|0|mdm:103445233|heterodimeric geranylgeranyl pyrophosphate synthase small subunit, chloroplastic; K13789 geranylgeranyl diphosphate synthase, type II [EC:2.5.1.1 2.5.1.10 2.5.1.29] (A)	[H]	Coenzyme transport and metabolism	Heterodimeric geranylgeranyl pyrophosphate synthase small subunit, chloroplastic OS=Arabidopsis thaliana GN=GGR PE=1 SV=2	H	Coenzyme transport and metabolism	PREDICTED: heterodimeric geranylgeranyl pyrophosphate synthase small subunit, chloroplastic [Malus domestica]
MD08G1247600	[L]	Replication, recombination and repair	Molecular Function: nucleic acid binding (GO:0003676);; Molecular Function: ATP binding (GO:0005524);; Molecular Function: ATP-dependent helicase activity (GO:0008026);;	K12598|0|mdm:103441992|superkiller viralicidic activity 2-like 2; K12598 ATP-dependent RNA helicase DOB1 [EC:3.6.4.13] (A)	[A]	RNA processing and modification	DExH-box ATP-dependent RNA helicase DExH9 OS=Arabidopsis thaliana GN=MTR4 PE=2 SV=1	L	Replication, recombination and repair	PREDICTED: DExH-box ATP-dependent RNA helicase DExH9 [Malus domestica]
MD08G1009300	[OJ]	--	--	K18757|0|pxb:103927511|la-related protein 1C-like; K18757 la-related protein 1 (A)	[OJ]	--	La-related protein 1C OS=Arabidopsis thaliana GN=LARP1C PE=1 SV=1	JO	--	PREDICTED: la-related protein 1C-like [Pyrus x bretschneideri]
MD11G1080800	--	--	Molecular Function: DNA binding (GO:0003677);; Molecular Function: chromatin binding (GO:0003682);; Molecular Function: sequence-specific DNA binding transcription factor activity (GO:0003700);; Cellular Component: nucleus (GO:0005634);; Biological Process: regulation of transcription, DNA-templated (GO:0006355);;	--	[O]	Posttranslational modification, protein turnover, chaperones	Transcription factor DIVARICATA OS=Antirrhinum majus GN=DIVARICATA PE=2 SV=1	K	Transcription	PREDICTED: transcription factor DIVARICATA-like [Malus domestica]
MD11G1277600	[O]	Posttranslational modification, protein turnover, chaperones	--	K09566|0|mdm:103430176|peptidyl-prolyl cis-trans isomerase cyp11-like; K09566 peptidyl-prolyl isomerase G (cyclophilin G) [EC:5.2.1.8] (A)	[O]	Posttranslational modification, protein turnover, chaperones	Peptidyl-prolyl cis-trans isomerase CYP63 OS=Arabidopsis thaliana GN=CYP63 PE=1 SV=1	O	Posttranslational modification, protein turnover, chaperones	PREDICTED: peptidyl-prolyl cis-trans isomerase CYP63-like isoform X1 [Malus domestica]
MD03G1147400	--	--	Biological Process: regulation of metabolic process (GO:0019222);; Cellular Component: mitochondrial membrane (GO:0031966);; Biological Process: cellular metabolic process (GO:0044237);; Biological Process: primary metabolic process (GO:0044238);; Cellular Component: respiratory chain complex I (GO:0045271);; Biological Process: organic substance metabolic process (GO:0071704);;	--	--	--	Uncharacterized protein At2g27730, mitochondrial OS=Arabidopsis thaliana GN=At2g27730 PE=1 SV=1	S	Function unknown	PREDICTED: uncharacterized protein At2g27730, mitochondrial-like [Malus domestica]
MD06G1121800	--	--	--	--	--	--	PHD finger protein At2g01810 OS=Arabidopsis thaliana GN=At2g01810 PE=3 SV=1	S	Function unknown	PREDICTED: uncharacterized protein LOC103437443 isoform X2 [Malus domestica]
MD17G1196800	--	--	Cellular Component: nuclear pore (GO:0005643);; Biological Process: intracellular transport (GO:0046907);;	K15304|0|mdm:103405492|E3 SUMO-protein ligase RanBP2-like; K15304 Ran-binding protein 3 (A)	[U]	Intracellular trafficking, secretion, and vesicular transport	Nuclear pore complex protein NUP50A OS=Arabidopsis thaliana GN=NUP50A PE=1 SV=1	U	Intracellular trafficking, secretion, and vesicular transport	PREDICTED: nuclear pore complex protein NUP50A-like [Malus domestica]
MD05G1186600	--	--	--	--	--	--	--	S	Function unknown	PREDICTED: uncharacterized protein LOC103435771 [Malus domestica]
MD11G1194500	[E]	Amino acid transport and metabolism	Molecular Function: serine-pyruvate transaminase activity (GO:0004760);; Cellular Component: peroxisome (GO:0005777);; Cellular Component: plasma membrane (GO:0005886);; Biological Process: water transport (GO:0006833);; Molecular Function: alanine-glyoxylate transaminase activity (GO:0008453);; Cellular Component: chloroplast stroma (GO:0009570);; Biological Process: response to salt stress (GO:…	K00830|0|pxb:103930865|serine--glyoxylate aminotransferase-like; K00830 alanine-glyoxylate transaminase / serine-glyoxylate transaminase / serine-pyruvate transaminase [EC:2.6.1.44 2.6.1.45 2.6.1.51] (A)	[R]	General function prediction only	Serine--glyoxylate aminotransferase OS=Arabidopsis thaliana GN=AGT1 PE=1 SV=2	E	Amino acid transport and metabolism	PREDICTED: serine--glyoxylate aminotransferase-like [Pyrus x bretschneideri]
MD02G1009500	[J]	Translation, ribosomal structure and biogenesis	--	K02951|7.45175e-84|mdm:103400002|40S ribosomal protein S12-like; K02951 small subunit ribosomal protein S12e (A)	[J]	Translation, ribosomal structure and biogenesis	40S ribosomal protein S12 OS=Hordeum vulgare GN=RPS12 PE=2 SV=1	J	Translation, ribosomal structure and biogenesis	PREDICTED: 40S ribosomal protein S12-like [Malus domestica]
MD04G1060500	[I]	Lipid transport and metabolism	--	K00232|0|mdm:103432990|peroxisomal acyl-coenzyme A oxidase 1; K00232 acyl-CoA oxidase [EC:1.3.3.6] (A)	[I]	Lipid transport and metabolism	Peroxisomal acyl-coenzyme A oxidase 1 OS=Arabidopsis thaliana GN=ACX1 PE=1 SV=1	I	Lipid transport and metabolism	PREDICTED: peroxisomal acyl-coenzyme A oxidase 1 [Malus domestica]
MD17G1007300	[E]	Amino acid transport and metabolism	--	K00928|0|mdm:103425766|aspartokinase 2, chloroplastic-like; K00928 aspartate kinase [EC:2.7.2.4] (A)	[E]	Amino acid transport and metabolism	Aspartokinase 2, chloroplastic OS=Arabidopsis thaliana GN=AK2 PE=1 SV=2	E	Amino acid transport and metabolism	PREDICTED: aspartokinase 2, chloroplastic-like isoform X1 [Malus domestica]
MD08G1159200	--	--	--	--	--	--	--	S	Function unknown	PREDICTED: uncharacterized protein LOC103430851 isoform X3 [Malus domestica]
MD13G1199600	--	--	Molecular Function: iron ion binding (GO:0005506);; Cellular Component: nucleus (GO:0005634);; Cellular Component: cytoplasm (GO:0005737);; Molecular Function: acireductone dioxygenase [iron(II)-requiring] activity (GO:0010309);; Biological Process: L-methionine biosynthetic process from methylthioadenosine (GO:0019509);; Biological Process: oxidation-reduction process (GO:0055114);;	K08967|6.50788e-147|mdm:103453168|1,2-dihydroxy-3-keto-5-methylthiopentene dioxygenase 2; K08967 1,2-dihydroxy-3-keto-5-methylthiopentene dioxygenase [EC:1.13.11.53 1.13.11.54] (A)	[S]	Function unknown	1,2-dihydroxy-3-keto-5-methylthiopentene dioxygenase 2 OS=Vitis vinifera GN=VIT_05s0020g04080 PE=3 SV=1	S	Function unknown	PREDICTED: 1,2-dihydroxy-3-keto-5-methylthiopentene dioxygenase 2 [Malus domestica]
MD10G1326000	[RTKL]	--	--	--	[T]	Signal transduction mechanisms	Protein STRUBBELIG-RECEPTOR FAMILY 8 OS=Arabidopsis thaliana GN=SRF8 PE=2 SV=1	T	Signal transduction mechanisms	PREDICTED: protein STRUBBELIG-RECEPTOR FAMILY 8 [Malus domestica]
MD01G1080500	[R]	General function prediction only	Molecular Function: translation initiation factor activity (GO:0003743);; Biological Process: translational initiation (GO:0006413);;	K03255|0|mdm:103414980|clustered mitochondria protein; K03255 protein TIF31 (A)	[R]	General function prediction only	Protein TSS OS=Arabidopsis thaliana GN=TSS PE=1 SV=1	S	Function unknown	PREDICTED: protein TSS [Malus domestica]
MD03G1089900	--	--	Molecular Function: DNA binding (GO:0003677);; Molecular Function: chromatin binding (GO:0003682);;	--	--	--	Telomere repeat-binding protein 5 OS=Arabidopsis thaliana GN=TRP5 PE=1 SV=2	K	Transcription	PREDICTED: telomere repeat-binding protein 5-like isoform X2 [Malus domestica]
MD01G1220700	--	--	Molecular Function: enzyme inhibitor activity (GO:0004857);; Cellular Component: cell wall (GO:0005618);; Molecular Function: pectinesterase activity (GO:0030599);; Biological Process: cell wall modification (GO:0042545);; Biological Process: negative regulation of catalytic activity (GO:0043086);; Molecular Function: aspartyl esterase activity (GO:0045330);; Biological Process: pectin catabolic …	--	--	--	Probable pectinesterase/pectinesterase inhibitor 34 OS=Arabidopsis thaliana GN=PME34 PE=2 SV=1	G	Carbohydrate transport and metabolism	PREDICTED: probable pectinesterase/pectinesterase inhibitor 34 [Malus domestica]
MD07G1053000	--	--	--	--	[D]	Cell cycle control, cell division, chromosome partitioning	Protein SAD1/UNC-84 domain protein 1 OS=Arabidopsis thaliana GN=SUN1 PE=1 SV=1	S	Function unknown	PREDICTED: protein SAD1/UNC-84 domain protein 1-like isoform X1 [Malus domestica]
MD01G1036500	[H]	Coenzyme transport and metabolism	Molecular Function: GTP cyclohydrolase II activity (GO:0003935);; Molecular Function: 3,4-dihydroxy-2-butanone-4-phosphate synthase activity (GO:0008686);; Biological Process: riboflavin biosynthetic process (GO:0009231);; Cellular Component: chloroplast stroma (GO:0009570);; Cellular Component: membrane (GO:0016020);; Biological Process: root hair elongation (GO:0048767);;	K14652|0|mdm:103437501|bifunctional riboflavin biosynthesis protein RIBA 1, chloroplastic-like; K14652 3,4-dihydroxy 2-butanone 4-phosphate synthase / GTP cyclohydrolase II [EC:4.1.99.12 3.5.4.25] (A)	[H]	Coenzyme transport and metabolism	Bifunctional riboflavin biosynthesis protein RIBA 1, chloroplastic OS=Arabidopsis thaliana GN=RIBA1 PE=1 SV=2	H	Coenzyme transport and metabolism	bifunctional riboflavin biosynthesis protein RIBA 1, chloroplastic-like [Malus domestica]
MD03G1287500	[R]	General function prediction only	--	K12890|1.10209e-82|pxb:103928430|serine/arginine-rich-splicing factor SR34-like; K12890 splicing factor, arginine/serine-rich 1/9 (A)	[A]	RNA processing and modification	Serine/arginine-rich-splicing factor SR34 OS=Arabidopsis thaliana GN=SR34 PE=1 SV=1	S	Function unknown	PREDICTED: serine/arginine-rich-splicing factor SR34 isoform X1 [Malus domestica]
MD05G1342900	[R]	General function prediction only	--	--	[I]	Lipid transport and metabolism	Phospholipase A I OS=Arabidopsis thaliana GN=PLA1 PE=2 SV=1	S	Function unknown	PREDICTED: phospholipase A I-like [Malus domestica]
MD01G1224900	--	--	Molecular Function: nucleotide binding (GO:0000166);; Biological Process: mRNA splicing, via spliceosome (GO:0000398);; Molecular Function: snRNA binding (GO:0017069);;	--	--	--	RNA-binding protein 2 OS=Medicago truncatula GN=RBP2 PE=2 SV=1	S	Function unknown	PREDICTED: RNA-binding protein 2-like [Malus domestica]
MD17G1057300	[J]	Translation, ribosomal structure and biogenesis	Molecular Function: structural constituent of ribosome (GO:0003735);; Cellular Component: cell wall (GO:0005618);; Cellular Component: nucleolus (GO:0005730);; Cellular Component: vacuole (GO:0005773);; Biological Process: translation (GO:0006412);; Cellular Component: membrane (GO:0016020);; Cellular Component: cytosolic small ribosomal subunit (GO:0022627);;	K02966|9.32e-102|pxb:103950993|40S ribosomal protein S19-3-like; K02966 small subunit ribosomal protein S19e (A)	[J]	Translation, ribosomal structure and biogenesis	40S ribosomal protein S19-1 OS=Arabidopsis thaliana GN=RPS19A PE=2 SV=1	J	Translation, ribosomal structure and biogenesis	PREDICTED: 40S ribosomal protein S19-3-like [Pyrus x bretschneideri]
MD09G1263100	--	--	--	K12881|2.84183e-150|mdm:103444192|THO complex subunit 4D; K12881 THO complex subunit 4 (A)	[A]	RNA processing and modification	THO complex subunit 4D OS=Arabidopsis thaliana GN=ALY4 PE=1 SV=1	S	Function unknown	PREDICTED: THO complex subunit 4D [Malus domestica]
MD15G1383200	--	--	Biological Process: mitochondrial transport (GO:0006839);; Cellular Component: integral component of membrane (GO:0016021);; Cellular Component: mitochondrial membrane (GO:0031966);;	K15104|0|mdm:103401982|mitochondrial uncoupling protein 5-like; K15104 solute carrier family 25 (mitochondrial oxoglutarate transporter), member 11 (A)	[C]	Energy production and conversion	Mitochondrial uncoupling protein 5 OS=Arabidopsis thaliana GN=PUMP5 PE=2 SV=1	S	Function unknown	PREDICTED: mitochondrial uncoupling protein 5-like [Malus domestica]
MD12G1206000	--	--	--	--	--	--	--	S	Function unknown	PREDICTED: uncharacterized protein LOC103450856 [Malus domestica]
MD09G1155300	--	--	--	--	[L]	Replication, recombination and repair	Zinc finger BED domain-containing protein RICESLEEPER 1 OS=Oryza sativa subsp. japonica GN=Os05g0239150 PE=3 SV=1	S	Function unknown	PREDICTED: zinc finger BED domain-containing protein RICESLEEPER 1-like [Malus domestica]
MD15G1309700	[C]	Energy production and conversion	--	K00140|0|mdm:103401538|uncharacterized LOC103401538; K00140 malonate-semialdehyde dehydrogenase (acetylating) / methylmalonate-semialdehyde dehydrogenase [EC:1.2.1.18 1.2.1.27] (A)	[EG]	--	Methylmalonate-semialdehyde dehydrogenase [acylating], mitochondrial OS=Arabidopsis thaliana GN=ALDH6B2 PE=2 SV=2	I	Lipid transport and metabolism	PREDICTED: uncharacterized protein LOC103401538 isoform X1 [Malus domestica]
MD16G1212600	[T]	Signal transduction mechanisms	Molecular Function: phosphorelay sensor kinase activity (GO:0000155);; Molecular Function: phosphorelay response regulator activity (GO:0000156);; Molecular Function: ATP binding (GO:0005524);; Cellular Component: endoplasmic reticulum membrane (GO:0005789);; Biological Process: regulation of transcription, DNA-templated (GO:0006355);; Biological Process: ethylene-activated signaling pathway (GO:…	K14509|6.37251e-98|mdm:103436150|ethylene receptor 2; K14509 ethylene receptor [EC:2.7.13.-] (A)	[T]	Signal transduction mechanisms	Ethylene receptor 2 OS=Arabidopsis thaliana GN=ETR2 PE=1 SV=2	T	Signal transduction mechanisms	ethylene receptor 2 precursor [Malus domestica]
MD13G1200700	[C]	Energy production and conversion	--	--	[C]	Energy production and conversion	Perakine reductase OS=Rauvolfia serpentina GN=PR PE=1 SV=1	C	Energy production and conversion	PREDICTED: perakine reductase-like [Pyrus x bretschneideri]
MD04G1194600	[T]	Signal transduction mechanisms	Biological Process: response to stress (GO:0006950);;	--	--	--	Universal stress protein A-like protein OS=Arabidopsis thaliana GN=At3g01520 PE=1 SV=2	S	Function unknown	PREDICTED: universal stress protein A-like protein isoform X2 [Malus domestica]
MD12G1096400	--	--	Molecular Function: sequence-specific DNA binding transcription factor activity (GO:0003700);; Biological Process: regulation of transcription, DNA-templated (GO:0006355);; Molecular Function: sequence-specific DNA binding (GO:0043565);;	K14431|0|mdm:103413649|transcription factor HBP-1b(c38)-like; K14431 transcription factor TGA (A)	--	--	TGACG-sequence-specific DNA-binding protein TGA-2.1 OS=Nicotiana tabacum GN=TGA21 PE=1 SV=1	K	Transcription	PREDICTED: transcription factor HBP-1b(c38)-like [Malus domestica]
MD08G1057600	--	--	--	--	[D]	Cell cycle control, cell division, chromosome partitioning	DNA mismatch repair protein MSH6 OS=Arabidopsis thaliana GN=MSH6 PE=1 SV=2	S	Function unknown	PREDICTED: titin [Malus domestica]
MD17G1177700	--	--	--	K14767|0|mdm:103453664|something about silencing protein 10; K14767 U3 small nucleolar RNA-associated protein 3 (A)	[B]	Chromatin structure and dynamics	--	S	Function unknown	PREDICTED: something about silencing protein 10 [Malus domestica]
MD09G1028500	--	--	--	--	--	--	--	S	Function unknown	PREDICTED: protein enabled [Malus domestica]
MD01G1210100	--	--	--	--	--	--	--	S	Function unknown	PREDICTED: uncharacterized protein LOC103443201 [Malus domestica]
MD02G1151400	--	--	--	K14721|0|pxb:103947489|DNA-directed RNA polymerase III subunit RPC5; K14721 DNA-directed RNA polymerase III subunit RPC5 (A)	[K]	Transcription	--	K	Transcription	PREDICTED: DNA-directed RNA polymerase III subunit RPC5 isoform X1 [Pyrus x bretschneideri]
MD14G1078100	[P]	Inorganic ion transport and metabolism	--	K01674|0|mdm:103415043|bifunctional monodehydroascorbate reductase and carbonic anhydrase nectarin-3-like; K01674 carbonic anhydrase [EC:4.2.1.1] (A)	[R]	General function prediction only	Alpha carbonic anhydrase 4 OS=Arabidopsis thaliana GN=ACA4 PE=3 SV=1	P	Inorganic ion transport and metabolism	PREDICTED: alpha carbonic anhydrase 4-like [Malus domestica]
MD15G1140800	--	--	--	--	[S]	Function unknown	--	S	Function unknown	PREDICTED: zinc finger CCCH domain-containing protein 13 [Malus domestica]
MD05G1012600	--	--	Molecular Function: catalytic activity (GO:0003824);; Cellular Component: endosome (GO:0005768);; Cellular Component: trans-Golgi network (GO:0005802);; Biological Process: metabolic process (GO:0008152);; Cellular Component: membrane (GO:0016020);;	--	[GMW]	--	Probable beta-1,4-xylosyltransferase IRX10 OS=Arabidopsis thaliana GN=IRX10 PE=2 SV=1	S	Function unknown	PREDICTED: probable beta-1,4-xylosyltransferase IRX10 isoform X1 [Malus domestica]
MD14G1127600	[L]	Replication, recombination and repair	--	K02684|2.04154e-47|mdm:103404366|DNA primase small subunit; K02684 DNA primase small subunit [EC:2.7.7.-] (A)	[L]	Replication, recombination and repair	--	L	Replication, recombination and repair	PREDICTED: LOW QUALITY PROTEIN: DNA primase small subunit [Malus domestica]
MD16G1239300	--	--	Molecular Function: DNA binding (GO:0003677);; Cellular Component: nucleus (GO:0005634);; Biological Process: regulation of transcription, DNA-templated (GO:0006355);; Biological Process: auxin-activated signaling pathway (GO:0009734);; Molecular Function: protein dimerization activity (GO:0046983);;	--	--	--	Auxin response factor 5 OS=Oryza sativa subsp. japonica GN=ARF5 PE=2 SV=2	K	Transcription	PREDICTED: auxin response factor 19-like [Malus domestica]
MD03G1142800	--	--	Molecular Function: nucleic acid binding (GO:0003676);; Molecular Function: sequence-specific DNA binding transcription factor activity (GO:0003700);; Cellular Component: intracellular (GO:0005622);; Biological Process: regulation of transcription, DNA-templated (GO:0006355);; Molecular Function: zinc ion binding (GO:0008270);;	--	[R]	General function prediction only	Zinc finger protein WIP3 OS=Arabidopsis thaliana GN=WIP3 PE=2 SV=1	S	Function unknown	PREDICTED: zinc finger protein WIP3-like [Malus domestica]
MD15G1315100	--	--	--	--	--	--	Protein CURVATURE THYLAKOID 1D, chloroplastic OS=Arabidopsis thaliana GN=CURT1D PE=1 SV=1	S	Function unknown	PREDICTED: protein CURVATURE THYLAKOID 1D, chloroplastic-like [Malus domestica]
MD10G1114400	--	--	--	--	--	--	--	S	Function unknown	PREDICTED: uncharacterized protein LOC103445178 [Malus domestica]
MD00G1063900	[O]	Posttranslational modification, protein turnover, chaperones	--	K14826|0|mdm:103443123|peptidyl-prolyl cis-trans isomerase FKBP53-like; K14826 FK506-binding nuclear protein [EC:5.2.1.8] (A)	[O]	Posttranslational modification, protein turnover, chaperones	Peptidyl-prolyl cis-trans isomerase FKBP53 OS=Arabidopsis thaliana GN=FKBP53 PE=1 SV=1	O	Posttranslational modification, protein turnover, chaperones	PREDICTED: peptidyl-prolyl cis-trans isomerase FKBP53-like isoform X3 [Malus domestica]
MD15G1249200	--	--	--	--	[K]	Transcription	Zinc finger CCCH domain-containing protein 44 OS=Arabidopsis thaliana GN=At3g51120 PE=2 SV=3	S	Function unknown	PREDICTED: zinc finger CCCH domain-containing protein 19-like isoform X1 [Pyrus x bretschneideri]
MD05G1151200	--	--	--	--	--	--	TMV resistance protein N OS=Nicotiana glutinosa GN=N PE=1 SV=1	S	Function unknown	PREDICTED: disease resistance protein TAO1-like [Malus domestica]
MD12G1118100	--	--	Molecular Function: DNA binding (GO:0003677);; Cellular Component: nucleus (GO:0005634);; Biological Process: regulation of transcription, DNA-templated (GO:0006355);; Biological Process: auxin-activated signaling pathway (GO:0009734);; Molecular Function: protein dimerization activity (GO:0046983);;	--	--	--	Auxin response factor 18 OS=Oryza sativa subsp. japonica GN=ARF18 PE=2 SV=1	K	Transcription	PREDICTED: auxin response factor 18-like isoform X1 [Malus domestica]
MD05G1014700	--	--	--	--	--	--	--	--	--	PREDICTED: uncharacterized protein LOC103437219 [Malus domestica]
MD11G1217300	--	--	--	K12832|8.45467e-60|pxb:103931014|uncharacterized protein At4g14342-like; K12832 splicing factor 3B subunit 5 (A)	[S]	Function unknown	Uncharacterized protein At3g23325 OS=Arabidopsis thaliana GN=At3g23325 PE=3 SV=1	A	RNA processing and modification	PREDICTED: uncharacterized protein At4g14342-like [Pyrus x bretschneideri]
MD07G1249300	--	--	--	K14550|0|mdm:103440073|uncharacterized protein At3g06530; K14550 U3 small nucleolar RNA-associated protein 10 (A)	[S]	Function unknown	Uncharacterized protein At3g06530 OS=Arabidopsis thaliana GN=At3g06530 PE=1 SV=3	J	Translation, ribosomal structure and biogenesis	PREDICTED: uncharacterized protein At3g06530 isoform X2 [Malus domestica]
MD07G1267300	--	--	Molecular Function: steroid binding (GO:0005496);; Cellular Component: nucleus (GO:0005634);; Cellular Component: endoplasmic reticulum (GO:0005783);; Cellular Component: plasma membrane (GO:0005886);; Cellular Component: chloroplast thylakoid membrane (GO:0009535);; Molecular Function: heme binding (GO:0020037);; Biological Process: negative regulation of cell growth (GO:0030308);; Molecular Fun…	K17278|8.04805e-133|mdm:103439740|membrane steroid-binding protein 2; K17278 membrane-associated progesterone receptor component (A)	[R]	General function prediction only	Membrane steroid-binding protein 2 OS=Arabidopsis thaliana GN=MSBP2 PE=1 SV=1	S	Function unknown	PREDICTED: membrane steroid-binding protein 2 [Malus domestica]
MD15G1138500	--	--	--	--	[U]	Intracellular trafficking, secretion, and vesicular transport	--	S	Function unknown	PREDICTED: target of Myb protein 1 [Malus domestica]
MD08G1229600	[S]	Function unknown	--	--	--	--	Protein SUPPRESSOR OF npr1-1, CONSTITUTIVE 1 OS=Arabidopsis thaliana GN=SNC1 PE=1 SV=5	S	Function unknown	PREDICTED: protein SUPPRESSOR OF npr1-1, CONSTITUTIVE 1-like [Pyrus x bretschneideri]
MD15G1142200	--	--	Biological Process: cell morphogenesis (GO:0000902);; Cellular Component: Golgi apparatus (GO:0005794);; Cellular Component: cytosol (GO:0005829);; Cellular Component: plasma membrane (GO:0005886);; Biological Process: gluconeogenesis (GO:0006094);; Biological Process: glycolytic process (GO:0006096);; Biological Process: response to desiccation (GO:0009269);; Cellular Component: plasmodesma (GO:…	--	--	--	Desiccation protectant protein Lea14 homolog OS=Glycine max PE=2 SV=1	S	Function unknown	PREDICTED: uncharacterized LOC103456322 isoform X1 [Malus domestica]
MD02G1151300	[R]	General function prediction only	--	K12837|0|mdm:103401676|splicing factor U2af large subunit A-like; K12837 splicing factor U2AF 65 kDa subunit (A)	[A]	RNA processing and modification	Splicing factor U2af large subunit B OS=Nicotiana plumbaginifolia GN=U2AF65B PE=2 SV=1	S	Function unknown	PREDICTED: splicing factor U2af large subunit A-like isoform X2 [Malus domestica]
MD11G1042000	--	--	--	K06699|0|pxb:103940397|proteasome activator subunit 4; K06699 proteasome activator subunit 4 (A)	[S]	Function unknown	Proteasome activator subunit 4 OS=Arabidopsis thaliana GN=PA200 PE=2 SV=2	O	Posttranslational modification, protein turnover, chaperones	PREDICTED: proteasome activator subunit 4 isoform X2 [Pyrus x bretschneideri]
MD10G1279900	--	--	--	--	--	--	Protein SCAR1 OS=Arabidopsis thaliana GN=SCAR1 PE=1 SV=1	S	Function unknown	PREDICTED: protein SCAR3-like isoform X2 [Malus domestica]
MD01G1022700	--	--	--	K12875|0|mdm:103437612|apoptotic chromatin condensation inducer in the nucleus; K12875 apoptotic chromatin condensation inducer in the nucleus (A)	[B]	Chromatin structure and dynamics	--	S	Function unknown	PREDICTED: apoptotic chromatin condensation inducer in the nucleus [Malus domestica]
MD10G1057900	[R]	General function prediction only	Molecular Function: zinc ion binding (GO:0008270);;	--	[O]	Posttranslational modification, protein turnover, chaperones	--	S	Function unknown	PREDICTED: protein RMD5 homolog A-like [Malus domestica]
MD05G1346000	--	--	--	--	--	--	--	--	--	PREDICTED: uncharacterized protein LOC103434503 isoform X1 [Malus domestica]
MD05G1093300	[F]	Nucleotide transport and metabolism	Biological Process: nucleobase-containing compound metabolic process (GO:0006139);; Molecular Function: transferase activity, transferring phosphorus-containing groups (GO:0016772);;	--	[F]	Nucleotide transport and metabolism	--	F	Nucleotide transport and metabolism	PREDICTED: uncharacterized protein LOC103420096 [Malus domestica]
MD04G1055700	[E]	Amino acid transport and metabolism	Biological Process: cellular amino acid metabolic process (GO:0006520);; Molecular Function: oxidoreductase activity, acting on the CH-NH2 group of donors, NAD or NADP as acceptor (GO:0016639);; Biological Process: oxidation-reduction process (GO:0055114);;	K00261|0|pmum:103337124|glutamate dehydrogenase 2-like; K00261 glutamate dehydrogenase (NAD(P)+) [EC:1.4.1.3] (A)	[E]	Amino acid transport and metabolism	Glutamate dehydrogenase 2 OS=Arabidopsis thaliana GN=GDH2 PE=1 SV=1	E	Amino acid transport and metabolism	PREDICTED: glutamate dehydrogenase 2-like [Prunus mume]
MD05G1348200	[EH]	--	Molecular Function: oxidoreductase activity, acting on a sulfur group of donors, disulfide as acceptor (GO:0016671);; Biological Process: sulfate reduction (GO:0019419);; Biological Process: cell redox homeostasis (GO:0045454);;	K05907|0|mdm:103408766|5'-adenylylsulfate reductase 1, chloroplastic-like; K05907 adenylyl-sulfate reductase (glutathione) [EC:1.8.4.9] (A)	[E]	Amino acid transport and metabolism	5&apos;-adenylylsulfate reductase 3, chloroplastic OS=Arabidopsis thaliana GN=APR3 PE=2 SV=2	P	Inorganic ion transport and metabolism	PREDICTED: 5&apos;-adenylylsulfate reductase 1, chloroplastic-like [Malus domestica]
MD04G1248400	[G]	Carbohydrate transport and metabolism	--	K01091|0|pxb:103951833|phosphoglycolate phosphatase 1B, chloroplastic-like; K01091 phosphoglycolate phosphatase [EC:3.1.3.18] (A)	[P]	Inorganic ion transport and metabolism	Phosphoglycolate phosphatase 1B, chloroplastic OS=Arabidopsis thaliana GN=PGLP1B PE=1 SV=1	G	Carbohydrate transport and metabolism	PREDICTED: phosphoglycolate phosphatase 1B, chloroplastic-like [Pyrus x bretschneideri]
MD13G1138500	--	--	--	--	--	--	Protein CHUP1, chloroplastic OS=Arabidopsis thaliana GN=CHUP1 PE=1 SV=1	S	Function unknown	PREDICTED: protein CHUP1, chloroplastic isoform X1 [Malus domestica]
MD10G1314900	[O]	Posttranslational modification, protein turnover, chaperones	--	K08770|0|gmx:100814539|polyubiquitin-A-like; K08770 ubiquitin C (A)	[OR]	--	Polyubiquitin 10 OS=Arabidopsis thaliana GN=UBQ10 PE=2 SV=2	O	Posttranslational modification, protein turnover, chaperones	PREDICTED: polyubiquitin-like isoform X1 [Nicotiana tomentosiformis]
MD05G1107800	[TDBLU]	--	--	K07203|0|pxb:103928072|serine/threonine-protein kinase TOR; K07203 FKBP12-rapamycin complex-associated protein (A)	[L]	Replication, recombination and repair	Serine/threonine-protein kinase TOR OS=Arabidopsis thaliana GN=TOR PE=1 SV=1	BDLTU	--	PREDICTED: serine/threonine-protein kinase TOR isoform X2 [Pyrus x bretschneideri]
MD01G1108000	--	--	--	--	[K]	Transcription	GATA transcription factor 8 OS=Arabidopsis thaliana GN=GATA8 PE=2 SV=1	K	Transcription	PREDICTED: GATA transcription factor 8-like [Malus domestica]
MD12G1143300	--	--	--	--	[I]	Lipid transport and metabolism	Oxysterol-binding protein-related protein 3A OS=Arabidopsis thaliana GN=ORP3A PE=1 SV=1	S	Function unknown	PREDICTED: oxysterol-binding protein-related protein 3A [Malus domestica]
MD03G1024500	[M]	Cell wall/membrane/envelope biogenesis	Cellular Component: outer membrane (GO:0019867);;	K07277|0|pxb:103963393|outer envelope protein 80, chloroplastic-like; K07277 outer membrane protein insertion porin family (A)	--	--	Outer envelope protein 80, chloroplastic OS=Arabidopsis thaliana GN=OEP80 PE=2 SV=1	M	Cell wall/membrane/envelope biogenesis	PREDICTED: outer envelope protein 80, chloroplastic-like [Pyrus x bretschneideri]
MD13G1182500	--	--	Cellular Component: membrane (GO:0016020);;	--	[S]	Function unknown	--	S	Function unknown	PREDICTED: probable serine incorporator [Malus domestica]
MD16G1176700	--	--	--	--	[KTDL]	--	--	S	Function unknown	PREDICTED: uncharacterized protein LOC103958544 isoform X1 [Pyrus x bretschneideri]
MD14G1041700	--	--	--	--	[R]	General function prediction only	--	U	Intracellular trafficking, secretion, and vesicular transport	PREDICTED: putative phosphatidylglycerol/phosphatidylinositol transfer protein DDB_G0282179 [Malus domestica]
MD02G1260600	[R]	General function prediction only	Molecular Function: magnesium ion binding (GO:0000287);; Biological Process: sucrose biosynthetic process (GO:0005986);; Biological Process: dephosphorylation (GO:0016311);; Molecular Function: sucrose-phosphate phosphatase activity (GO:0050307);;	--	--	--	Sucrose-phosphatase 1 OS=Nicotiana tabacum GN=SPP1 PE=2 SV=1	S	Function unknown	PREDICTED: sucrose-phosphatase 1-like isoform X1 [Pyrus x bretschneideri]
MD11G1280200	[P]	Inorganic ion transport and metabolism	--	K17471|0|mdm:103430184|sulfate transporter 3.1-like; K17471 sulfate transporter 3 (A)	[P]	Inorganic ion transport and metabolism	Sulfate transporter 3.1 OS=Arabidopsis thaliana GN=SULTR3;1 PE=2 SV=1	P	Inorganic ion transport and metabolism	PREDICTED: sulfate transporter 3.1-like [Malus domestica]
MD16G1173900	[KL]	--	Molecular Function: DNA binding (GO:0003677);; Molecular Function: helicase activity (GO:0004386);; Molecular Function: ATP binding (GO:0005524);; Cellular Component: nucleus (GO:0005634);; Molecular Function: transferase activity (GO:0016740);; Molecular Function: nucleosome binding (GO:0031491);; Biological Process: ATP-dependent chromatin remodeling (GO:0043044);;	K11654|0|mdm:103403781|putative chromatin-remodeling complex ATPase chain; K11654 SWI/SNF-related matrix-associated actin-dependent regulator of chromatin subfamily A member 5 [EC:3.6.4.-] (A)	[K]	Transcription	ISWI chromatin-remodeling complex ATPase CHR11 OS=Arabidopsis thaliana GN=CHR11 PE=1 SV=4	L	Replication, recombination and repair	PREDICTED: ISWI chromatin-remodeling complex ATPase CHR11-like [Malus domestica]
MD15G1073200	--	--	--	--	--	--	3-oxo-Delta(4,5)-steroid 5-beta-reductase OS=Arabidopsis thaliana GN=VEP1 PE=1 SV=1	S	Function unknown	PREDICTED: 3-oxo-Delta(4,5)-steroid 5-beta-reductase-like [Pyrus x bretschneideri]
MD05G1360300	--	--	Biological Process: regulation of transcription, DNA-templated (GO:0006355);;	--	--	--	Scarecrow-like protein 13 OS=Arabidopsis thaliana GN=SCL13 PE=2 SV=2	K	Transcription	PREDICTED: scarecrow-like protein 13 [Malus domestica]
MD15G1162800	--	--	--	K07964|0|mdm:103400053|heparanase-like protein 3; K07964 heparanase 1 [EC:3.2.1.166] (A)	--	--	Heparanase-like protein 3 OS=Arabidopsis thaliana GN=At5g34940 PE=2 SV=2	G	Carbohydrate transport and metabolism	PREDICTED: heparanase-like protein 3 [Malus domestica]
MD01G1073500	[R]	General function prediction only	--	K14566|7.71914e-144|mdm:103426776|rRNA-processing protein FCF1 homolog; K14566 U3 small nucleolar RNA-associated protein 24 (A)	[R]	General function prediction only	--	S	Function unknown	PREDICTED: rRNA-processing protein FCF1 homolog isoform X2 [Pyrus x bretschneideri]
MD15G1352300	[E]	Amino acid transport and metabolism	Molecular Function: aminoacylase activity (GO:0004046);; Cellular Component: cytoplasm (GO:0005737);; Biological Process: cellular amino acid metabolic process (GO:0006520);;	K14677|0|pxb:103936000|aminoacylase-1-like; K14677 aminoacylase [EC:3.5.1.14] (A)	[E]	Amino acid transport and metabolism	--	E	Amino acid transport and metabolism	aminoacylase-1 [Prunus persica]
MD17G1188900	--	--	--	K18666|0|mdm:103432209|uncharacterized LOC103432209; K18666 activating signal cointegrator complex subunit 1 (A)	[K]	Transcription	--	S	Function unknown	PREDICTED: uncharacterized protein LOC103432209 isoform X1 [Malus domestica]
MD17G1018800	--	--	Biological Process: calcium ion transport (GO:0006816);; Biological Process: Golgi organization (GO:0007030);; Biological Process: response to salt stress (GO:0009651);; Biological Process: response to sucrose (GO:0009744);; Biological Process: response to glucose (GO:0009749);; Biological Process: response to fructose (GO:0009750);;	--	--	--	Peptidyl serine alpha-galactosyltransferase OS=Arabidopsis thaliana GN=SERGT1 PE=2 SV=1	S	Function unknown	PREDICTED: uncharacterized protein LOC103960998 [Pyrus x bretschneideri]
MD04G1045900	--	--	Molecular Function: structural constituent of ribosome (GO:0003735);; Biological Process: translation (GO:0006412);; Cellular Component: cytosolic large ribosomal subunit (GO:0022625);;	K02923|8.04505e-43|pxb:103933221|60S ribosomal protein L38; K02923 large subunit ribosomal protein L38e (A)	[J]	Translation, ribosomal structure and biogenesis	60S ribosomal protein L38 OS=Arabidopsis thaliana GN=RPL38A PE=3 SV=1	J	Translation, ribosomal structure and biogenesis	PREDICTED: 60S ribosomal protein L38 [Pyrus x bretschneideri]
MD12G1224200	[P]	Inorganic ion transport and metabolism	Biological Process: sodium ion transport (GO:0006814);; Biological Process: regulation of pH (GO:0006885);; Molecular Function: sodium:proton antiporter activity (GO:0015385);; Cellular Component: integral component of membrane (GO:0016021);; Biological Process: transmembrane transport (GO:0055085);;	--	[P]	Inorganic ion transport and metabolism	Sodium/hydrogen exchanger 2 OS=Arabidopsis thaliana GN=NHX2 PE=2 SV=2	P	Inorganic ion transport and metabolism	PREDICTED: sodium/hydrogen exchanger 1-like [Malus domestica]
MD05G1290900	[P]	Inorganic ion transport and metabolism	Cellular Component: membrane (GO:0016020);; Biological Process: metal ion transport (GO:0030001);; Molecular Function: metal ion transmembrane transporter activity (GO:0046873);; Biological Process: transmembrane transport (GO:0055085);;	--	--	--	--	S	Function unknown	PREDICTED: uncharacterized protein LOC103427869 [Malus domestica]
MD12G1187100	--	--	Biological Process: lipid transport (GO:0006869);; Molecular Function: lipid binding (GO:0008289);;	--	--	--	Non-specific lipid-transfer protein OS=Malus domestica GN=MALD3 PE=1 SV=1	U	Intracellular trafficking, secretion, and vesicular transport	non-specific lipid-transfer protein precursor [Malus domestica]
MD16G1012900	--	--	Molecular Function: binding (GO:0005488);;	--	[TU]	--	Putative clathrin assembly protein At1g25240 OS=Arabidopsis thaliana GN=At1g25240 PE=3 SV=1	U	Intracellular trafficking, secretion, and vesicular transport	PREDICTED: putative clathrin assembly protein At1g25240 [Malus domestica]
MD09G1121900	[T]	Signal transduction mechanisms	Molecular Function: phosphorelay sensor kinase activity (GO:0000155);; Molecular Function: phosphorelay response regulator activity (GO:0000156);; Biological Process: phosphorelay signal transduction system (GO:0000160);; Molecular Function: osmosensor activity (GO:0005034);; Molecular Function: ATP binding (GO:0005524);; Biological Process: regulation of transcription, DNA-templated (GO:0006355)…	K14489|0|pxb:103955055|histidine kinase 2; K14489 arabidopsis histidine kinase 2/3/4 (cytokinin receptor) [EC:2.7.13.3] (A)	[T]	Signal transduction mechanisms	Histidine kinase 2 OS=Arabidopsis thaliana GN=AHK2 PE=1 SV=1	T	Signal transduction mechanisms	CHASE histidine kinase 2 [Malus domestica]
MD12G1033300	[L]	Replication, recombination and repair	--	K08734|0|pxb:103961692|DNA mismatch repair protein MLH1; K08734 DNA mismatch repair protein MLH1 (A)	[L]	Replication, recombination and repair	DNA mismatch repair protein MLH1 OS=Arabidopsis thaliana GN=MLH1 PE=2 SV=1	L	Replication, recombination and repair	PREDICTED: DNA mismatch repair protein MLH1 isoform X2 [Pyrus x bretschneideri]
MD00G1053300	[L]	Replication, recombination and repair	--	K02327|0|mdm:103428006|DNA polymerase delta catalytic subunit-like; K02327 DNA polymerase delta subunit 1 [EC:2.7.7.7] (A)	[L]	Replication, recombination and repair	DNA polymerase delta catalytic subunit OS=Oryza sativa subsp. japonica GN=POLD1 PE=2 SV=1	L	Replication, recombination and repair	PREDICTED: DNA polymerase delta catalytic subunit-like [Malus domestica]
MD04G1037300	[H]	Coenzyme transport and metabolism	Molecular Function: biotin synthase activity (GO:0004076);; Cellular Component: mitochondrion (GO:0005739);; Biological Process: acetyl-CoA metabolic process (GO:0006084);; Biological Process: microtubule nucleation (GO:0007020);; Molecular Function: zinc ion binding (GO:0008270);; Biological Process: biotin biosynthetic process (GO:0009102);; Biological Process: regulation of meristem growth (GO…	K01012|0|pxb:103929914|biotin synthase-like; K01012 biotin synthase [EC:2.8.1.6] (A)	[H]	Coenzyme transport and metabolism	Biotin synthase OS=Arabidopsis thaliana GN=BIO2 PE=2 SV=1	H	Coenzyme transport and metabolism	PREDICTED: biotin synthase-like [Pyrus x bretschneideri]
MD15G1114500	--	--	--	--	[T]	Signal transduction mechanisms	Probable ADP-ribosylation factor GTPase-activating protein AGD14 OS=Arabidopsis thaliana GN=AGD14 PE=1 SV=2	U	Intracellular trafficking, secretion, and vesicular transport	PREDICTED: probable ADP-ribosylation factor GTPase-activating protein AGD14 isoform X1 [Malus domestica]
MD13G1162600	[I]	Lipid transport and metabolism	--	K01115|0|mdm:103452855|phospholipase D p1-like; K01115 phospholipase D1/2 [EC:3.1.4.4] (A)	[I]	Lipid transport and metabolism	Phospholipase D zeta 1 OS=Arabidopsis thaliana GN=PLDZETA1 PE=1 SV=1	I	Lipid transport and metabolism	PREDICTED: phospholipase D zeta 1-like [Malus domestica]
MD06G1105600	--	--	Cellular Component: intracellular membrane-bounded organelle (GO:0043231);; Cellular Component: cytoplasmic part (GO:0044444);;	--	--	--	--	S	Function unknown	PREDICTED: uncharacterized protein LOC103428275 [Malus domestica]
MD11G1071900	--	--	--	--	[R]	General function prediction only	SelT-like protein OS=Arabidopsis thaliana GN=At3g47300 PE=2 SV=2	O	Posttranslational modification, protein turnover, chaperones	PREDICTED: selT-like protein [Malus domestica]
MD16G1152800	[I]	Lipid transport and metabolism	Biological Process: metabolic process (GO:0008152);; Molecular Function: isomerase activity (GO:0016853);;	--	[I]	Lipid transport and metabolism	Probable enoyl-CoA hydratase 1, peroxisomal OS=Arabidopsis thaliana GN=ECHIA PE=1 SV=1	I	Lipid transport and metabolism	PREDICTED: probable enoyl-CoA hydratase 1, peroxisomal [Malus domestica]
MD02G1289800	[J]	Translation, ribosomal structure and biogenesis	Biological Process: RNA methylation (GO:0001510);; Molecular Function: structural constituent of ribosome (GO:0003735);; Cellular Component: vacuolar membrane (GO:0005774);; Cellular Component: Golgi apparatus (GO:0005794);; Biological Process: translation (GO:0006412);; Cellular Component: plasmodesma (GO:0009506);; Cellular Component: cytosolic small ribosomal subunit (GO:0022627);;	K02975|1.68185e-45|mdm:103407425|40S ribosomal protein S25-2; K02975 small subunit ribosomal protein S25e (A)	[J]	Translation, ribosomal structure and biogenesis	40S ribosomal protein S25-2 OS=Arabidopsis thaliana GN=RPS25B PE=3 SV=1	J	Translation, ribosomal structure and biogenesis	PREDICTED: 40S ribosomal protein S25-2 [Malus domestica]
MD02G1043000	--	--	--	--	[P]	Inorganic ion transport and metabolism	Protein tesmin/TSO1-like CXC 5 OS=Arabidopsis thaliana GN=TCX5 PE=1 SV=1	S	Function unknown	PREDICTED: protein tesmin/TSO1-like CXC 5 [Malus domestica]
MD15G1231200	--	--	--	--	[U]	Intracellular trafficking, secretion, and vesicular transport	--	S	Function unknown	PREDICTED: uncharacterized protein LOC103425029 isoform X1 [Malus domestica]
MD10G1069700	[O]	Posttranslational modification, protein turnover, chaperones	--	--	[O]	Posttranslational modification, protein turnover, chaperones	Chaperone protein dnaJ 10 OS=Arabidopsis thaliana GN=ATJ10 PE=2 SV=2	O	Posttranslational modification, protein turnover, chaperones	PREDICTED: chaperone protein dnaJ 10-like [Malus domestica]
MD16G1169000	--	--	Cellular Component: integral component of membrane (GO:0016021);; Molecular Function: transferase activity, transferring hexosyl groups (GO:0016758);;	K08238|0|mdm:103403759|CAMTA1; calmodulin binding transcription activator 1; K08238 xyloglucan 6-xylosyltransferase [EC:2.4.2.39] (A)	[GM]	--	Xyloglucan 6-xylosyltransferase 2 OS=Arabidopsis thaliana GN=XXT2 PE=1 SV=1	S	Function unknown	calmodulin binding transcription activator 1 [Malus domestica]
MD17G1218700	[CE]	--	Molecular Function: magnesium ion binding (GO:0000287);; Molecular Function: 3-isopropylmalate dehydrogenase activity (GO:0003862);; Cellular Component: cytoplasm (GO:0005737);; Biological Process: leucine biosynthetic process (GO:0009098);; Molecular Function: NAD binding (GO:0051287);; Biological Process: oxidation-reduction process (GO:0055114);;	K00052|0|mdm:103436054|3-isopropylmalate dehydrogenase 2, chloroplastic-like; K00052 3-isopropylmalate dehydrogenase [EC:1.1.1.85] (A)	[E]	Amino acid transport and metabolism	3-isopropylmalate dehydrogenase, chloroplastic OS=Brassica napus PE=2 SV=1	E	Amino acid transport and metabolism	PREDICTED: 3-isopropylmalate dehydrogenase 2, chloroplastic-like [Malus domestica]
MD01G1083800	--	--	--	--	[R]	General function prediction only	--	S	Function unknown	PREDICTED: uncharacterized protein LOC103415639 [Malus domestica]
MD13G1273200	--	--	Biological Process: very long-chain fatty acid metabolic process (GO:0000038);; Molecular Function: nucleotide binding (GO:0000166);; Molecular Function: iron ion binding (GO:0005506);; Cellular Component: plasma membrane (GO:0005886);; Biological Process: fatty acid biosynthetic process (GO:0006633);; Biological Process: cuticle hydrocarbon biosynthetic process (GO:0006723);; Biological Process:…	--	--	--	Protein ECERIFERUM 3 OS=Arabidopsis thaliana GN=CER3 PE=1 SV=1	S	Function unknown	PREDICTED: protein ECERIFERUM 3 [Prunus mume]
MD04G1210800	--	--	Cellular Component: plasma membrane (GO:0005886);; Biological Process: response to desiccation (GO:0009269);; Biological Process: response to cold (GO:0009409);; Cellular Component: chloroplast thylakoid membrane (GO:0009535);; Cellular Component: chloroplast stroma (GO:0009570);; Biological Process: response to fungus (GO:0009620);; Biological Process: response to salt stress (GO:0009651);; Cell…	K10525|2.32654e-175|mdm:103433988|allene oxide cyclase 2, chloroplastic-like; K10525 allene oxide cyclase [EC:5.3.99.6] (A)	--	--	Allene oxide cyclase, chloroplastic OS=Oryza sativa subsp. japonica GN=AOC PE=1 SV=1	S	Function unknown	PREDICTED: allene oxide cyclase 2, chloroplastic-like [Malus domestica]
MD14G1115200	--	--	--	--	[U]	Intracellular trafficking, secretion, and vesicular transport	Reticulon-like protein B2 OS=Arabidopsis thaliana GN=RTNLB2 PE=1 SV=1	U	Intracellular trafficking, secretion, and vesicular transport	PREDICTED: reticulon-like protein B2 [Malus domestica]
MD12G1183300	--	--	Molecular Function: DNA binding (GO:0003677);; Molecular Function: sequence-specific DNA binding transcription factor activity (GO:0003700);; Biological Process: regulation of transcription, DNA-templated (GO:0006355);; Biological Process: multicellular organismal development (GO:0007275);;	--	--	--	NAC domain-containing protein 86 OS=Arabidopsis thaliana GN=NAC086 PE=2 SV=1	S	Function unknown	PREDICTED: uncharacterized protein LOC108172847 [Malus domestica]
MD06G1067000	[G]	Carbohydrate transport and metabolism	Molecular Function: catalytic activity (GO:0003824);; Biological Process: carbohydrate metabolic process (GO:0005975);;	K00616|0|pxb:103935819|probable transaldolase; K00616 transaldolase [EC:2.2.1.2] (A)	[G]	Carbohydrate transport and metabolism	--	G	Carbohydrate transport and metabolism	PREDICTED: uncharacterized protein LOC103935816 [Pyrus x bretschneideri]
MD04G1174800	--	--	--	--	--	--	--	S	Function unknown	PREDICTED: uncharacterized protein LOC103433757 [Malus domestica]
MD05G1045000	[P]	Inorganic ion transport and metabolism	--	--	--	--	Potassium transporter 7 OS=Arabidopsis thaliana GN=POT7 PE=1 SV=2	P	Inorganic ion transport and metabolism	PREDICTED: potassium transporter 7-like isoform X1 [Malus domestica]
MD14G1156300	[O]	Posttranslational modification, protein turnover, chaperones	--	--	--	--	Chaperone protein dnaJ 49 OS=Arabidopsis thaliana GN=ATJ49 PE=2 SV=2	O	Posttranslational modification, protein turnover, chaperones	PREDICTED: uncharacterized protein LOC103454979 [Malus domestica]
MD15G1114900	--	--	--	--	--	--	--	S	Function unknown	PREDICTED: protein TolA-like [Malus domestica]
MD02G1290300	--	--	--	--	--	--	F-box protein SKIP5 OS=Arabidopsis thaliana GN=SKIP5 PE=1 SV=1	S	Function unknown	PREDICTED: F-box protein SKIP5 isoform X1 [Pyrus x bretschneideri]
MD06G1012200	[O]	Posttranslational modification, protein turnover, chaperones	Molecular Function: glutathione transferase activity (GO:0004364);;	K00799|2.73918e-159|mdm:103436762|glutathione S-transferase F13-like; K00799 glutathione S-transferase [EC:2.5.1.18] (A)	[O]	Posttranslational modification, protein turnover, chaperones	Glutathione S-transferase F13 OS=Arabidopsis thaliana GN=GSTF13 PE=3 SV=1	O	Posttranslational modification, protein turnover, chaperones	PREDICTED: glutathione S-transferase F13-like [Malus domestica]
MD13G1029500	--	--	--	--	--	--	Probable peroxygenase 4 OS=Arabidopsis thaliana GN=PXG4 PE=1 SV=1	S	Function unknown	PREDICTED: probable peroxygenase 4 [Malus domestica]
MD04G1217000	[R]	General function prediction only	--	K15361|0|mdm:103434135|WD repeat-containing protein 48 homolog; K15361 WD repeat-containing protein 48 (A)	[S]	Function unknown	Coatomer subunit alpha-2 OS=Arabidopsis thaliana GN=At2g21390 PE=2 SV=1	S	Function unknown	PREDICTED: WD repeat-containing protein 48 homolog [Malus domestica]
MD14G1076700	--	--	Cellular Component: nuclear pore (GO:0005643);; Biological Process: transport (GO:0006810);;	K14309|0|mdm:103420246|uncharacterized protein At2g41620-like; K14309 nuclear pore complex protein Nup93 (A)	[D]	Cell cycle control, cell division, chromosome partitioning	Nuclear pore complex protein NUP93A OS=Arabidopsis thaliana GN=NUP93A PE=1 SV=2	U	Intracellular trafficking, secretion, and vesicular transport	PREDICTED: nuclear pore complex protein NUP93A-like [Malus domestica]
MD01G1044400	--	--	--	K05752|5.58164e-56|pxb:103937635|protein BRICK 1; K05752 chromosome 3 open reading frame 10 (A)	--	--	Protein BRICK 1 OS=Arabidopsis thaliana GN=BRK1 PE=1 SV=1	S	Function unknown	protein BRICK 1 [Prunus persica]
MD05G1057800	--	--	--	--	--	--	--	S	Function unknown	uncharacterized protein LOC110768496 [Prunus avium]
MD17G1138200	--	--	--	--	--	--	--	S	Function unknown	PREDICTED: uncharacterized protein LOC103405173 [Malus domestica]
MD10G1041500	--	--	--	--	--	--	NAC domain-containing protein 17 OS=Arabidopsis thaliana GN=NAC017 PE=2 SV=1	S	Function unknown	PREDICTED: NAC domain-containing protein 17-like [Malus domestica]
MD03G1172000	--	--	--	--	--	--	--	S	Function unknown	PREDICTED: uncharacterized protein LOC103418956 [Malus domestica]
MD15G1399400	[J]	Translation, ribosomal structure and biogenesis	--	K15407|0|mdm:103402111|queuine tRNA-ribosyltransferase subunit QTRTD1-like; K15407 queuine tRNA-ribosyltransferase subunit QTRTD1 [EC:2.4.2.29] (A)	[A]	RNA processing and modification	--	J	Translation, ribosomal structure and biogenesis	PREDICTED: queuine tRNA-ribosyltransferase subunit QTRTD1-like [Malus domestica]
MD02G1002900	[RTKL]	--	Molecular Function: protein serine/threonine kinase activity (GO:0004674);; Molecular Function: protein serine/threonine/tyrosine kinase activity (GO:0004712);; Molecular Function: ATP binding (GO:0005524);; Biological Process: regulation of signal transduction (GO:0009966);; Biological Process: protein autophosphorylation (GO:0046777);;	--	[T]	Signal transduction mechanisms	Serine/threonine-protein kinase CTR1 OS=Arabidopsis thaliana GN=CTR1 PE=1 SV=1	T	Signal transduction mechanisms	PREDICTED: dual specificity protein kinase shkC-like [Malus domestica]
MD00G1041900	[BK]	--	--	K11649|0|mdm:103424685|SWI/SNF complex subunit SWI3C-like; K11649 SWI/SNF related-matrix-associated actin-dependent regulator of chromatin subfamily C (A)	[B]	Chromatin structure and dynamics	SWI/SNF complex subunit SWI3C OS=Arabidopsis thaliana GN=SWI3C PE=1 SV=1	BK	--	PREDICTED: SWI/SNF complex subunit SWI3C-like isoform X1 [Malus domestica]
MD02G1146200	--	--	--	--	[S]	Function unknown	Late embryogenesis abundant protein D-29 OS=Gossypium hirsutum PE=3 SV=1	S	Function unknown	PREDICTED: uncharacterized protein LOC103407118 [Malus domestica]
MD09G1287000	[S]	Function unknown	--	--	--	--	--	S	Function unknown	PREDICTED: uncharacterized protein LOC103953104 [Pyrus x bretschneideri]
MD11G1094800	[K]	Transcription	--	K03122|0|mdm:103447502|transcription initiation factor IIA large subunit; K03122 transcription initiation factor TFIIA large subunit (A)	[K]	Transcription	--	K	Transcription	PREDICTED: transcription initiation factor IIA large subunit [Malus domestica]
MD11G1139900	[KL]	--	--	K11642|0|mdm:103413039|helicase protein MOM1-like; K11642 chromodomain-helicase-DNA-binding protein 3 [EC:3.6.4.12] (A)	[R]	General function prediction only	Helicase protein MOM1 OS=Arabidopsis thaliana GN=MOM1 PE=1 SV=1	L	Replication, recombination and repair	PREDICTED: helicase protein MOM1-like isoform X2 [Malus domestica]
MD08G1244100	--	--	--	K03233|0|mdm:103428965|elongation factor 1-gamma-like; K03233 elongation factor 1-gamma (A)	[O]	Posttranslational modification, protein turnover, chaperones	Elongation factor 1-gamma OS=Prunus avium PE=2 SV=1	O	Posttranslational modification, protein turnover, chaperones	PREDICTED: LOW QUALITY PROTEIN: elongation factor 1-gamma-like [Malus domestica]
MD12G1216700	--	--	Molecular Function: calcium ion binding (GO:0005509);; Cellular Component: photosystem II oxygen evolving complex (GO:0009654);; Biological Process: photosynthesis (GO:0015979);; Cellular Component: extrinsic component of membrane (GO:0019898);;	--	--	--	PsbP domain-containing protein 7, chloroplastic OS=Arabidopsis thaliana GN=PPD7 PE=2 SV=1	S	Function unknown	PREDICTED: psbP domain-containing protein 7, chloroplastic [Malus domestica]
MD02G1184400	--	--	--	--	[K]	Transcription	BTB/POZ and TAZ domain-containing protein 4 OS=Arabidopsis thaliana GN=BT4 PE=1 SV=1	S	Function unknown	PREDICTED: BTB/POZ and TAZ domain-containing protein 4 [Malus domestica]
MD14G1217600	[OU]	--	--	K04773|0|mdm:103431205|serine protease SPPA, chloroplastic-like; K04773 protease IV [EC:3.4.21.-] (A)	--	--	Serine protease SPPA, chloroplastic OS=Arabidopsis thaliana GN=SPPA PE=2 SV=1	OU	--	PREDICTED: serine protease SPPA, chloroplastic-like [Malus domestica]
MD16G1167200	[O]	Posttranslational modification, protein turnover, chaperones	--	K08592|0|mdm:103425651|ubiquitin-like-specific protease ESD4; K08592 sentrin-specific protease 1 [EC:3.4.22.68] (A)	[O]	Posttranslational modification, protein turnover, chaperones	Ubiquitin-like-specific protease ESD4 OS=Arabidopsis thaliana GN=ESD4 PE=1 SV=1	O	Posttranslational modification, protein turnover, chaperones	PREDICTED: ubiquitin-like-specific protease ESD4 [Malus domestica]
MD16G1191300	--	--	Molecular Function: iron ion binding (GO:0005506);; Cellular Component: chloroplast (GO:0009507);; Biological Process: response to wounding (GO:0009611);; Molecular Function: linoleate 13S-lipoxygenase activity (GO:0016165);; Biological Process: oxylipin biosynthetic process (GO:0031408);; Biological Process: root development (GO:0048364);; Biological Process: response to other organism (GO:00517…	K15718|0|pxb:103956622|probable linoleate 9S-lipoxygenase 5; K15718 linoleate 9S-lipoxygenase [EC:1.13.11.58] (A)	--	--	Linoleate 9S-lipoxygenase 5, chloroplastic OS=Arabidopsis thaliana GN=LOX5 PE=2 SV=2	S	Function unknown	PREDICTED: probable linoleate 9S-lipoxygenase 5 [Pyrus x bretschneideri]
MD10G1319300	--	--	--	K16743|0|mdm:103446864|abnormal spindle-like microcephaly-associated protein homolog; K16743 abnormal spindle-like microcephaly-associated protein (A)	[Z]	Cytoskeleton	Protein OPAQUE1 OS=Zea mays GN=O1 PE=1 SV=1	Z	Cytoskeleton	PREDICTED: LOW QUALITY PROTEIN: abnormal spindle-like microcephaly-associated protein homolog [Pyrus x bretschneideri]
MD17G1234500	[O]	Posttranslational modification, protein turnover, chaperones	--	K03028|0|mdm:103405640|26S proteasome non-ATPase regulatory subunit 2 homolog A-like; K03028 26S proteasome regulatory subunit N1 (A)	[O]	Posttranslational modification, protein turnover, chaperones	26S proteasome non-ATPase regulatory subunit 2 homolog A OS=Arabidopsis thaliana GN=RPN1A PE=1 SV=2	O	Posttranslational modification, protein turnover, chaperones	PREDICTED: 26S proteasome non-ATPase regulatory subunit 2 homolog A-like [Malus domestica]
MD15G1427500	--	--	--	K11718|0|mdm:103402520|UDP-glucose:glycoprotein glucosyltransferase; K11718 UDP-glucose:glycoprotein glucosyltransferase [EC:2.4.1.-] (A)	[G]	Carbohydrate transport and metabolism	UDP-glucose:glycoprotein glucosyltransferase OS=Arabidopsis thaliana GN=UGGT PE=1 SV=1	O	Posttranslational modification, protein turnover, chaperones	PREDICTED: UDP-glucose:glycoprotein glucosyltransferase [Malus domestica]
MD12G1186700	--	--	Biological Process: MAPK cascade (GO:0000165);; Biological Process: respiratory burst involved in defense response (GO:0002679);; Biological Process: protein targeting to membrane (GO:0006612);; Biological Process: membrane fusion (GO:0006944);; Biological Process: systemic acquired resistance, salicylic acid mediated signaling pathway (GO:0009862);; Biological Process: jasmonic acid mediated sig…	--	--	--	MACPF domain-containing protein CAD1 OS=Arabidopsis thaliana GN=CAD1 PE=2 SV=1	S	Function unknown	PREDICTED: MACPF domain-containing protein CAD1-like [Malus domestica]
MD12G1032200	--	--	Biological Process: proteolysis (GO:0006508);; Molecular Function: serine-type peptidase activity (GO:0008236);;	K01285|0|mdm:103413500|lysosomal Pro-X carboxypeptidase-like; K01285 lysosomal Pro-X carboxypeptidase [EC:3.4.16.2] (A)	[OR]	--	Probable serine protease EDA2 OS=Arabidopsis thaliana GN=EDA2 PE=2 SV=2	S	Function unknown	PREDICTED: lysosomal Pro-X carboxypeptidase-like [Malus domestica]
MD14G1094100	[F]	Nucleotide transport and metabolism	--	--	--	--	Trihelix transcription factor ASIL2 OS=Arabidopsis thaliana GN=ASIL2 PE=2 SV=1	F	Nucleotide transport and metabolism	PREDICTED: uncharacterized protein LOC103454716 [Malus domestica]
MD05G1249500	[RTKL]	--	--	--	[T]	Signal transduction mechanisms	Serine/threonine-protein kinase EDR1 OS=Arabidopsis thaliana GN=EDR1 PE=1 SV=1	T	Signal transduction mechanisms	PREDICTED: uncharacterized protein LOC103435299 [Malus domestica]
MD11G1133400	[G]	Carbohydrate transport and metabolism	Molecular Function: beta-galactosidase activity (GO:0004565);; Cellular Component: cell wall (GO:0005618);; Biological Process: carbohydrate metabolic process (GO:0005975);; Molecular Function: carbohydrate binding (GO:0030246);; Molecular Function: cation binding (GO:0043169);;	--	[G]	Carbohydrate transport and metabolism	Beta-galactosidase 8 OS=Arabidopsis thaliana GN=BGAL8 PE=2 SV=2	G	Carbohydrate transport and metabolism	PREDICTED: beta-galactosidase 8-like [Malus domestica]
MD00G1149500	--	--	--	--	[S]	Function unknown	BAG-associated GRAM protein 1 OS=Arabidopsis thaliana GN=BAGP1 PE=1 SV=1	S	Function unknown	PREDICTED: BAG-associated GRAM protein 1 isoform X1 [Malus domestica]
MD15G1365300	[R]	General function prediction only	--	--	--	--	Katanin p80 WD40 repeat-containing subunit B1 homolog OS=Arabidopsis thaliana GN=At5g23430 PE=2 SV=3	S	Function unknown	PREDICTED: uncharacterized WD repeat-containing protein C2A9.03-like [Malus domestica]
MD04G1006300	[O]	Posttranslational modification, protein turnover, chaperones	Cellular Component: proteasome complex (GO:0000502);; Cellular Component: cytosol (GO:0005829);; Cellular Component: plasma membrane (GO:0005886);; Molecular Function: enzyme regulator activity (GO:0030234);; Biological Process: regulation of protein catabolic process (GO:0042176);; Biological Process: regulation of catalytic activity (GO:0050790);;	K03032|0|mdm:103443490|26S proteasome non-ATPase regulatory subunit 1 homolog A; K03032 26S proteasome regulatory subunit N2 (A)	[O]	Posttranslational modification, protein turnover, chaperones	26S proteasome non-ATPase regulatory subunit 1 homolog A OS=Arabidopsis thaliana GN=RPN2A PE=1 SV=1	O	Posttranslational modification, protein turnover, chaperones	PREDICTED: 26S proteasome non-ATPase regulatory subunit 1 homolog A [Malus domestica]
MD15G1153500	[RTKL]	--	Molecular Function: calmodulin-dependent protein kinase activity (GO:0004683);; Molecular Function: ATP binding (GO:0005524);; Biological Process: protein phosphorylation (GO:0006468);; Biological Process: signal transduction (GO:0007165);; Biological Process: multicellular organismal development (GO:0007275);; Biological Process: response to water deprivation (GO:0009414);; Biological Process: b…	--	[T]	Signal transduction mechanisms	CBL-interacting serine/threonine-protein kinase 6 OS=Arabidopsis thaliana GN=CIPK6 PE=1 SV=1	T	Signal transduction mechanisms	CBL-interacting serine/threonine-protein kinase 6-like [Malus domestica]
MD07G1186700	[R]	General function prediction only	--	--	[R]	General function prediction only	Ankyrin repeat-containing protein ITN1 OS=Arabidopsis thaliana GN=ITN1 PE=1 SV=1	S	Function unknown	PREDICTED: ankyrin repeat-containing protein ITN1-like [Pyrus x bretschneideri]
MD08G1220400	--	--	--	--	--	--	Uncharacterized protein At1g04910 OS=Arabidopsis thaliana GN=At1g04910 PE=2 SV=1	S	Function unknown	PREDICTED: uncharacterized protein At1g04910-like isoform X1 [Pyrus x bretschneideri]
MD03G1209000	--	--	--	--	--	--	--	S	Function unknown	PREDICTED: AP-5 complex subunit zeta-1 [Malus domestica]
MD03G1163500	[TZDR]	--	Molecular Function: calcium ion binding (GO:0005509);; Cellular Component: nucleus (GO:0005634);; Cellular Component: vacuolar membrane (GO:0005774);; Cellular Component: cytosol (GO:0005829);; Cellular Component: plasma membrane (GO:0005886);;	K02183|1.66723e-106|aly:ARALYDRAFT_481582|CAM2; calmodulin-2; K02183 calmodulin (A)	[T]	Signal transduction mechanisms	Calmodulin-related protein OS=Petunia hybrida GN=CAM53 PE=2 SV=2	DTZ	--	calmodulin-7-like [Hevea brasiliensis]
MD15G1038500	--	--	--	--	[D]	Cell cycle control, cell division, chromosome partitioning	--	S	Function unknown	PREDICTED: caldesmon-like [Malus domestica]
MD10G1332200	--	--	--	--	[S]	Function unknown	--	S	Function unknown	PREDICTED: ER membrane protein complex subunit 3-like [Malus domestica]
MD11G1247500	[R]	General function prediction only	--	--	--	--	Protein SPA1-RELATED 3 OS=Arabidopsis thaliana GN=SPA3 PE=1 SV=1	T	Signal transduction mechanisms	PREDICTED: protein SPA1-RELATED 3-like isoform X1 [Malus domestica]
MD05G1239900	--	--	--	--	[KT]	--	Protein FORGETTER 1 OS=Arabidopsis thaliana GN=FGT1 PE=1 SV=1	S	Function unknown	PREDICTED: protein strawberry notch isoform X1 [Pyrus x bretschneideri]
MD13G1141000	--	--	Cellular Component: integral component of membrane (GO:0016021);;	--	[GE]	--	Probable sugar phosphate/phosphate translocator At3g17430 OS=Arabidopsis thaliana GN=At3g17430 PE=1 SV=1	S	Function unknown	PREDICTED: probable sugar phosphate/phosphate translocator At3g17430 [Malus domestica]
MD02G1029300	--	--	Molecular Function: hydrolase activity, hydrolyzing O-glycosyl compounds (GO:0004553);; Biological Process: carbohydrate metabolic process (GO:0005975);;	--	--	--	Glucan endo-1,3-beta-glucosidase 14 OS=Arabidopsis thaliana GN=At2g27500 PE=1 SV=2	G	Carbohydrate transport and metabolism	PREDICTED: glucan endo-1,3-beta-glucosidase 14-like [Pyrus x bretschneideri]
MD10G1197900	[O]	Posttranslational modification, protein turnover, chaperones	Biological Process: response to stress (GO:0006950);;	K09534|0|mdm:103445763|dnaJ homolog subfamily C member 14; K09534 DnaJ homolog subfamily C member 14 (A)	[O]	Posttranslational modification, protein turnover, chaperones	Chaperone protein dnaJ 39 OS=Arabidopsis thaliana GN=ATJ39 PE=2 SV=2	O	Posttranslational modification, protein turnover, chaperones	PREDICTED: dnaJ homolog subfamily C member 14 [Malus domestica]
MD08G1005300	[J]	Translation, ribosomal structure and biogenesis	Biological Process: RNA modification (GO:0009451);; Biological Process: flower development (GO:0009908);; Biological Process: histone modification (GO:0016570);;	K07583|0|mdm:103440213|putative tRNA pseudouridine synthase Pus10; K07583 tRNA pseudouridine synthase 10 [EC:5.4.99.-] (A)	[J]	Translation, ribosomal structure and biogenesis	--	J	Translation, ribosomal structure and biogenesis	PREDICTED: putative tRNA pseudouridine synthase Pus10 [Malus domestica]
MD05G1156300	--	--	--	--	--	--	Protein FAR1-RELATED SEQUENCE 5 OS=Arabidopsis thaliana GN=FRS5 PE=2 SV=1	S	Function unknown	PREDICTED: protein FAR-RED IMPAIRED RESPONSE 1-like isoform X1 [Pyrus x bretschneideri]
MD07G1252300	[D]	Cell cycle control, cell division, chromosome partitioning	Biological Process: double-strand break repair via homologous recombination (GO:0000724);; Cellular Component: Smc5-Smc6 complex (GO:0030915);;	--	[L]	Replication, recombination and repair	Structural maintenance of chromosomes protein 6B OS=Arabidopsis thaliana GN=SMC6B PE=2 SV=1	D	Cell cycle control, cell division, chromosome partitioning	PREDICTED: structural maintenance of chromosomes protein 6B-like [Malus domestica]
MD13G1023200	--	--	--	--	--	--	MLP-like protein 328 OS=Arabidopsis thaliana GN=MLP328 PE=2 SV=1	S	Function unknown	PREDICTED: MLP-like protein 328 [Malus domestica]
MD01G1107300	[R]	General function prediction only	--	--	--	--	--	S	Function unknown	PREDICTED: uncharacterized protein LOC103406265 [Malus domestica]
MD08G1064700	--	--	Molecular Function: transporter activity (GO:0005215);; Cellular Component: mitochondrial inner membrane (GO:0005743);; Biological Process: mitochondrial transport (GO:0006839);; Cellular Component: integral component of membrane (GO:0016021);; Biological Process: transmembrane transport (GO:0055085);;	K15084|0|pxb:103927526|graves disease carrier protein-like; K15084 solute carrier family 25 (mitochondrial carrier protein), member 16 (A)	[C]	Energy production and conversion	Mitochondrial adenine nucleotide transporter ADNT1 OS=Arabidopsis thaliana GN=ADNT1 PE=1 SV=1	S	Function unknown	PREDICTED: graves disease carrier protein-like [Pyrus x bretschneideri]
MD09G1194300	--	--	--	--	--	--	--	S	Function unknown	PREDICTED: uncharacterized protein LOC103453558 [Malus domestica]
MD15G1133100	[G]	Carbohydrate transport and metabolism	Biological Process: metabolic process (GO:0008152);; Molecular Function: UTP-monosaccharide-1-phosphate uridylyltransferase activity (GO:0051748);;	K12447|0|mdm:103456258|UDP-sugar pyrophosphorylase; K12447 UDP-sugar pyrophosphorylase [EC:2.7.7.64] (A)	[M]	Cell wall/membrane/envelope biogenesis	UDP-sugar pyrophosphorylase OS=Cucumis melo GN=USP PE=1 SV=1	G	Carbohydrate transport and metabolism	PREDICTED: UDP-sugar pyrophosphorylase [Malus domestica]
MD14G1044400	[Q]	Secondary metabolites biosynthesis, transport and catabolism	Biological Process: etioplast organization (GO:0009662);; Biological Process: carotenoid biosynthetic process (GO:0016117);; Molecular Function: carotenoid isomerase activity (GO:0046608);;	K09835|0|mdm:103454192|prolycopene isomerase, chloroplastic; K09835 prolycopene isomerase [EC:5.2.1.13] (A)	[H]	Coenzyme transport and metabolism	Prolycopene isomerase, chloroplastic OS=Daucus carota GN=CRTISO PE=2 SV=1	Q	Secondary metabolites biosynthesis, transport and catabolism	prolycopene isomerase, chloroplastic [Malus domestica]
MD11G1257300	[R]	General function prediction only	Molecular Function: translation elongation factor activity (GO:0003746);; Biological Process: translational elongation (GO:0006414);;	--	[S]	Function unknown	Transcription elongation factor 1 homolog OS=Oryza sativa subsp. japonica GN=Os07g0631100 PE=3 SV=1	S	Function unknown	PREDICTED: transcription elongation factor 1 homolog [Malus domestica]
MD09G1148300	--	--	--	K03352|0|mdm:103443169|anaphase-promoting complex subunit 5; K03352 anaphase-promoting complex subunit 5 (A)	[DO]	--	Anaphase-promoting complex subunit 5 OS=Arabidopsis thaliana GN=APC5 PE=1 SV=1	O	Posttranslational modification, protein turnover, chaperones	PREDICTED: anaphase-promoting complex subunit 5 [Malus domestica]
MD10G1206600	[KL]	--	--	K11320|0|mdm:103445816|protein PHOTOPERIOD-INDEPENDENT EARLY FLOWERING 1; K11320 E1A-binding protein p400 [EC:3.6.4.-] (A)	[R]	General function prediction only	Protein PHOTOPERIOD-INDEPENDENT EARLY FLOWERING 1 OS=Arabidopsis thaliana GN=PIE1 PE=1 SV=1	L	Replication, recombination and repair	PREDICTED: protein PHOTOPERIOD-INDEPENDENT EARLY FLOWERING 1 isoform X1 [Malus domestica]
MD17G1006600	[C]	Energy production and conversion	--	K00411|0|mdm:103416934|cytochrome b-c1 complex subunit Rieske-4, mitochondrial-like; K00411 ubiquinol-cytochrome c reductase iron-sulfur subunit [EC:1.10.2.2] (A)	[C]	Energy production and conversion	Cytochrome b-c1 complex subunit Rieske-2, mitochondrial OS=Nicotiana tabacum PE=2 SV=1	C	Energy production and conversion	PREDICTED: cytochrome b-c1 complex subunit Rieske-4, mitochondrial-like [Malus domestica]
MD03G1252200	[H]	Coenzyme transport and metabolism	Molecular Function: trans-hexaprenyltranstransferase activity (GO:0000010);; Biological Process: isoprenoid biosynthetic process (GO:0008299);; Biological Process: photosynthesis (GO:0015979);;	K05356|0|mdm:103427372|probable solanesyl-diphosphate synthase 3, chloroplastic; K05356 all-trans-nonaprenyl-diphosphate synthase [EC:2.5.1.84 2.5.1.85] (A)	[H]	Coenzyme transport and metabolism	Solanesyl diphosphate synthase 2, chloroplastic OS=Arabidopsis thaliana GN=SPS2 PE=1 SV=1	H	Coenzyme transport and metabolism	PREDICTED: probable solanesyl-diphosphate synthase 3, chloroplastic [Malus domestica]
MD09G1080000	[R]	General function prediction only	--	--	[R]	General function prediction only	--	S	Function unknown	PREDICTED: EVI5-like protein [Malus domestica]
MD11G1280500	[I]	Lipid transport and metabolism	Molecular Function: biotin carboxylase activity (GO:0004075);; Molecular Function: methylcrotonoyl-CoA carboxylase activity (GO:0004485);; Molecular Function: ATP binding (GO:0005524);; Biological Process: leucine catabolic process (GO:0006552);; Biological Process: response to sucrose (GO:0009744);; Biological Process: response to fructose (GO:0009750);; Cellular Component: cytosolic ribosome (G…	K01968|0|mdm:103448970|methylcrotonoyl-CoA carboxylase subunit alpha, mitochondrial; K01968 3-methylcrotonyl-CoA carboxylase alpha subunit [EC:6.4.1.4] (A)	[IE]	--	Methylcrotonoyl-CoA carboxylase subunit alpha, mitochondrial OS=Glycine max GN=MCCA PE=1 SV=2	I	Lipid transport and metabolism	PREDICTED: methylcrotonoyl-CoA carboxylase subunit alpha, mitochondrial [Malus domestica]
MD14G1214800	--	--	Biological Process: polysaccharide biosynthetic process (GO:0000271);; Biological Process: polysaccharide catabolic process (GO:0000272);; Biological Process: starch metabolic process (GO:0005982);; Biological Process: glycolytic process (GO:0006096);; Biological Process: calcium ion transport (GO:0006816);; Biological Process: water transport (GO:0006833);; Biological Process: hyperosmotic respo…	--	--	--	Protein COBRA OS=Arabidopsis thaliana GN=COB PE=2 SV=1	S	Function unknown	PREDICTED: protein COBRA-like [Pyrus x bretschneideri]
MD13G1014300	--	--	Cellular Component: integral component of membrane (GO:0016021);;	--	[U]	Intracellular trafficking, secretion, and vesicular transport	Transmembrane 9 superfamily member 3 OS=Arabidopsis thaliana GN=TMN3 PE=2 SV=1	S	Function unknown	PREDICTED: transmembrane 9 superfamily member 3 [Malus domestica]
MD00G1171900	--	--	--	K13648|0|mdm:103404492|probable galacturonosyltransferase 14; K13648 alpha-1,4-galacturonosyltransferase [EC:2.4.1.43] (A)	--	--	Probable galacturonosyltransferase 14 OS=Arabidopsis thaliana GN=GAUT14 PE=2 SV=1	G	Carbohydrate transport and metabolism	PREDICTED: probable galacturonosyltransferase 14 isoform X2 [Malus domestica]
MD10G1057600	[G]	Carbohydrate transport and metabolism	--	--	[G]	Carbohydrate transport and metabolism	Phosphoglycerate mutase-like protein 1 OS=Arabidopsis thaliana GN=At5g64460 PE=2 SV=1	S	Function unknown	PREDICTED: phosphoglycerate mutase-like protein 1 isoform X1 [Pyrus x bretschneideri]
MD06G1138200	--	--	--	--	[P]	Inorganic ion transport and metabolism	Heavy metal-associated isoprenylated plant protein 7 OS=Arabidopsis thaliana GN=HIPP07 PE=1 SV=1	S	Function unknown	PREDICTED: heavy metal-associated isoprenylated plant protein 3-like isoform X3 [Pyrus x bretschneideri]
MD16G1013200	--	--	Biological Process: microtubule cytoskeleton organization (GO:0000226);; Biological Process: cytokinesis (GO:0000910);; Molecular Function: microtubule binding (GO:0008017);;	K16732|0|mdm:103444610|65-kDa microtubule-associated protein 6; K16732 protein regulator of cytokinesis 1 (A)	[DZ]	--	65-kDa microtubule-associated protein 6 OS=Arabidopsis thaliana GN=MAP65-6 PE=1 SV=1	S	Function unknown	PREDICTED: 65-kDa microtubule-associated protein 6 [Malus domestica]
MD17G1197700	--	--	--	--	--	--	--	S	Function unknown	PREDICTED: uncharacterized protein LOC103931287 isoform X2 [Pyrus x bretschneideri]
MD15G1363000	[J]	Translation, ribosomal structure and biogenesis	--	K02908|8.67653e-77|pxb:103938884|60S ribosomal protein L30-like; K02908 large subunit ribosomal protein L30e (A)	[J]	Translation, ribosomal structure and biogenesis	60S ribosomal protein L30 OS=Lupinus luteus GN=RPL30 PE=3 SV=1	J	Translation, ribosomal structure and biogenesis	PREDICTED: 60S ribosomal protein L30-like [Pyrus x bretschneideri]
MD05G1166200	[O]	Posttranslational modification, protein turnover, chaperones	Molecular Function: calmodulin binding (GO:0005516);; Cellular Component: cytosol (GO:0005829);; Biological Process: protein folding (GO:0006457);; Biological Process: N-terminal protein myristoylation (GO:0006499);; Biological Process: response to osmotic stress (GO:0006970);; Biological Process: response to high light intensity (GO:0009644);; Biological Process: seed germination (GO:0009845);; …	K09571|0|mdm:103435889|peptidyl-prolyl cis-trans isomerase FKBP62; K09571 FK506-binding protein 4/5 [EC:5.2.1.8] (A)	[O]	Posttranslational modification, protein turnover, chaperones	Peptidyl-prolyl cis-trans isomerase FKBP62 OS=Arabidopsis thaliana GN=FKBP62 PE=1 SV=2	O	Posttranslational modification, protein turnover, chaperones	PREDICTED: peptidyl-prolyl cis-trans isomerase FKBP62 [Malus domestica]
MD12G1083100	--	--	Biological Process: formation of translation preinitiation complex (GO:0001731);; Molecular Function: translation initiation factor activity (GO:0003743);; Cellular Component: eukaryotic translation initiation factor 3 complex (GO:0005852);; Cellular Component: plasma membrane (GO:0005886);; Biological Process: regulation of translational initiation (GO:0006446);; Cellular Component: COP9 signalo…	K03250|0|pper:PRUPE_ppa005923mg|hypothetical protein; K03250 translation initiation factor 3 subunit E (A)	[J]	Translation, ribosomal structure and biogenesis	Eukaryotic translation initiation factor 3 subunit E OS=Arabidopsis thaliana GN=TIF3E1 PE=1 SV=1	J	Translation, ribosomal structure and biogenesis	eukaryotic translation initiation factor 3 subunit E [Prunus avium]
MD09G1291500	--	--	--	--	[M]	Cell wall/membrane/envelope biogenesis	Pectin acetylesterase 3 OS=Arabidopsis thaliana GN=PAE3 PE=2 SV=1	S	Function unknown	PREDICTED: pectin acetylesterase 3 [Malus domestica]
MD04G1061500	[T]	Signal transduction mechanisms	--	K14165|0|mdm:103432998|putative dual specificity protein phosphatase DSP8; K14165 atypical dual specificity phosphatase [EC:3.1.3.16 3.1.3.48] (A)	[V]	Defense mechanisms	Putative dual specificity protein phosphatase DSP8 OS=Arabidopsis thaliana GN=DSP8 PE=2 SV=2	T	Signal transduction mechanisms	PREDICTED: putative dual specificity protein phosphatase DSP8 [Malus domestica]
MD02G1088500	[R]	General function prediction only	--	K15176|0|mdm:103418084|RNA polymerase-associated protein CTR9 homolog; K15176 RNA polymerase-associated protein CTR9 (A)	[P]	Inorganic ion transport and metabolism	Protein CTR9 homolog OS=Arabidopsis thaliana GN=VIP6 PE=1 SV=1	S	Function unknown	PREDICTED: protein CTR9 homolog [Malus domestica]
MD05G1276000	--	--	Molecular Function: nucleic acid binding (GO:0003676);; Cellular Component: nucleus (GO:0005634);; Biological Process: embryo development ending in seed dormancy (GO:0009793);; Biological Process: negative regulation of photomorphogenesis (GO:0010100);; Cellular Component: Cul4-RING E3 ubiquitin ligase complex (GO:0080008);;	K10610|0|pxb:103952395|DNA damage-binding protein 1-like; K10610 DNA damage-binding protein 1 (A)	[L]	Replication, recombination and repair	DNA damage-binding protein 1 OS=Solanum lycopersicum GN=DDB1 PE=1 SV=1	L	Replication, recombination and repair	PREDICTED: DNA damage-binding protein 1-like [Pyrus x bretschneideri]
MD01G1238900	--	--	--	--	--	--	--	S	Function unknown	PREDICTED: uncharacterized protein LOC103445016 isoform X2 [Malus domestica]
MD16G1061900	--	--	--	K15283|0|mdm:103402827|triose phosphate/phosphate translocator, chloroplastic-like; K15283 solute carrier family 35, member E1 (A)	[GE]	--	Triose phosphate/phosphate translocator, chloroplastic OS=Spinacia oleracea PE=1 SV=1	S	Function unknown	PREDICTED: triose phosphate/phosphate translocator, chloroplastic-like [Malus domestica]
MD04G1042800	[R]	General function prediction only	Molecular Function: nucleotide binding (GO:0000166);;	--	[J]	Translation, ribosomal structure and biogenesis	Probable tRNA modification GTPase MnmE OS=Cyanidium caldarium GN=mnmE PE=3 SV=1	S	Function unknown	uncharacterized protein LOC18777703 [Prunus persica]
MD04G1081900	[R]	General function prediction only	--	K09553|0|mdm:103433084|hsp70-Hsp90 organizing protein 3; K09553 stress-induced-phosphoprotein 1 (A)	[O]	Posttranslational modification, protein turnover, chaperones	Hsp70-Hsp90 organizing protein 1 OS=Arabidopsis thaliana GN=HOP1 PE=2 SV=1	S	Function unknown	PREDICTED: hsp70-Hsp90 organizing protein 3 [Malus domestica]
MD01G1045300	[G]	Carbohydrate transport and metabolism	--	--	--	--	Probable beta-D-xylosidase 6 OS=Arabidopsis thaliana GN=BXL6 PE=2 SV=1	G	Carbohydrate transport and metabolism	PREDICTED: probable beta-D-xylosidase 6 [Malus domestica]
MD02G1319100	--	--	--	K11000|0|mdm:103413515|callose synthase 1-like; K11000 callose synthase [EC:2.4.1.-] (A)	[M]	Cell wall/membrane/envelope biogenesis	Callose synthase 2 OS=Arabidopsis thaliana GN=CALS2 PE=2 SV=3	S	Function unknown	PREDICTED: callose synthase 1-like [Malus domestica]
MD10G1241500	--	--	Molecular Function: UDP-glucose 4-epimerase activity (GO:0003978);; Biological Process: galactose metabolic process (GO:0006012);; Biological Process: cellular metabolic process (GO:0044237);; Molecular Function: UDP-arabinose 4-epimerase activity (GO:0050373);; Molecular Function: coenzyme binding (GO:0050662);;	K12448|0|mdm:103446079|UDP-arabinose 4-epimerase 1; K12448 UDP-arabinose 4-epimerase [EC:5.1.3.5] (A)	[M]	Cell wall/membrane/envelope biogenesis	UDP-arabinose 4-epimerase 1 OS=Arabidopsis thaliana GN=MUR4 PE=1 SV=1	M	Cell wall/membrane/envelope biogenesis	PREDICTED: UDP-arabinose 4-epimerase 1 [Malus domestica]
MD07G1301500	--	--	--	--	--	--	--	S	Function unknown	PREDICTED: uncharacterized protein LOC103439963 isoform X1 [Malus domestica]
MD01G1068300	--	--	--	--	[G]	Carbohydrate transport and metabolism	Probable receptor-like protein kinase At5g24010 OS=Arabidopsis thaliana GN=At5g24010 PE=1 SV=1	S	Function unknown	PREDICTED: uncharacterized protein LOC103957435 [Pyrus x bretschneideri]
MD17G1139300	--	--	--	--	[D]	Cell cycle control, cell division, chromosome partitioning	Protein MEI2-like 2 OS=Oryza sativa subsp. japonica GN=ML2 PE=2 SV=1	S	Function unknown	PREDICTED: protein MEI2-like 2 isoform X1 [Malus domestica]
MD12G1060300	--	--	--	--	[T]	Signal transduction mechanisms	CDK5RAP3-like protein OS=Arabidopsis thaliana GN=At5g06830 PE=2 SV=2	S	Function unknown	PREDICTED: LOW QUALITY PROTEIN: CDK5RAP3-like protein [Malus domestica]
MD04G1244100	--	--	Molecular Function: metal ion binding (GO:0046872);;	--	[R]	General function prediction only	Zinc finger CCCH domain-containing protein ZFN-like OS=Pisum sativum PE=2 SV=1	S	Function unknown	PREDICTED: zinc finger CCCH domain-containing protein ZFN-like [Malus domestica]
MD10G1306300	--	--	Molecular Function: DNA binding (GO:0003677);; Molecular Function: sequence-specific DNA binding transcription factor activity (GO:0003700);; Cellular Component: nucleus (GO:0005634);; Biological Process: regulation of transcription, DNA-templated (GO:0006355);; Molecular Function: protein dimerization activity (GO:0046983);;	--	[K]	Transcription	MADS-box protein AGL24 OS=Arabidopsis thaliana GN=AGL24 PE=1 SV=1	K	Transcription	PREDICTED: MADS-box protein AGL24-like [Malus domestica]
MD13G1173900	[RTKL]	--	Molecular Function: protein serine/threonine kinase activity (GO:0004674);; Molecular Function: ATP binding (GO:0005524);; Biological Process: protein phosphorylation (GO:0006468);;	K08819|0|mdm:103452994|probable serine/threonine-protein kinase At1g54610; K08819 cyclin-dependent kinase 12/13 [EC:2.7.11.22 2.7.11.23] (A)	[D]	Cell cycle control, cell division, chromosome partitioning	Probable serine/threonine-protein kinase At1g54610 OS=Arabidopsis thaliana GN=At1g54610 PE=1 SV=1	T	Signal transduction mechanisms	PREDICTED: probable serine/threonine-protein kinase At1g54610 [Malus domestica]
MD16G1224400	[R]	General function prediction only	--	--	--	--	Protoporphyrinogen oxidase, chloroplastic/mitochondrial OS=Spinacia oleracea GN=POX2 PE=1 SV=1	M	Cell wall/membrane/envelope biogenesis	PREDICTED: uncharacterized protein LOC103403572 [Malus domestica]
MD15G1440400	[G]	Carbohydrate transport and metabolism	--	K17108|0|pxb:103933391|non-lysosomal glucosylceramidase-like; K17108 non-lysosomal glucosylceramidase [EC:3.2.1.45] (A)	[G]	Carbohydrate transport and metabolism	--	G	Carbohydrate transport and metabolism	PREDICTED: non-lysosomal glucosylceramidase-like isoform X3 [Pyrus x bretschneideri]
MD06G1147600	[RTKL]	--	--	K08818|0|mdm:103420302|cyclin-dependent kinase G-2-like; K08818 cell division cycle 2-like [EC:2.7.11.22] (A)	[R]	General function prediction only	Cyclin-dependent kinase G-2 OS=Oryza sativa subsp. japonica GN=CDKG-2 PE=2 SV=2	T	Signal transduction mechanisms	PREDICTED: cyclin-dependent kinase G-2-like [Malus domestica]
MD02G1003700	[I]	Lipid transport and metabolism	--	K17361|0|mdm:103446727|acyl-coenzyme A thioesterase 9, mitochondrial-like; K17361 acyl-coenzyme A thioesterase 9 [EC:3.1.2.-] (A)	[I]	Lipid transport and metabolism	--	S	Function unknown	PREDICTED: acyl-coenzyme A thioesterase 9, mitochondrial-like [Malus domestica]
MD13G1042400	--	--	Biological Process: fatty acid biosynthetic process (GO:0006633);; Cellular Component: membrane (GO:0016020);; Molecular Function: transferase activity, transferring acyl groups other than amino-acyl groups (GO:0016747);;	K15397|0|mdm:103451654|3-ketoacyl-CoA synthase 6-like; K15397 3-ketoacyl-CoA synthase [EC:2.3.1.199] (A)	--	--	3-ketoacyl-CoA synthase 6 OS=Arabidopsis thaliana GN=CUT1 PE=1 SV=1	I	Lipid transport and metabolism	PREDICTED: 3-ketoacyl-CoA synthase 6-like [Malus domestica]
MD05G1184900	--	--	Molecular Function: motor activity (GO:0003774);; Molecular Function: actin binding (GO:0003779);; Molecular Function: ATP binding (GO:0005524);; Cellular Component: peroxisome (GO:0005777);; Cellular Component: myosin complex (GO:0016459);; Molecular Function: Rab GTPase binding (GO:0017137);; Molecular Function: GTP-dependent protein binding (GO:0030742);; Biological Process: root hair elongati…	K10357|0|mdm:103428015|myosin-6-like; K10357 myosin V (A)	[Z]	Cytoskeleton	Myosin-6 OS=Arabidopsis thaliana GN=XI-2 PE=1 SV=1	Z	Cytoskeleton	PREDICTED: myosin-6-like isoform X1 [Malus domestica]
MD09G1022300	[J]	Translation, ribosomal structure and biogenesis	Molecular Function: translation elongation factor activity (GO:0003746);; Molecular Function: GTPase activity (GO:0003924);; Molecular Function: GTP binding (GO:0005525);; Biological Process: GTP catabolic process (GO:0006184);; Biological Process: translational elongation (GO:0006414);; Cellular Component: chloroplast (GO:0009507);;	K02358|0|mdm:103442203|elongation factor TuA, chloroplastic-like; K02358 elongation factor Tu (A)	[J]	Translation, ribosomal structure and biogenesis	Elongation factor Tu, chloroplastic OS=Glycine max GN=TUFB1 PE=3 SV=1	J	Translation, ribosomal structure and biogenesis	PREDICTED: elongation factor TuA, chloroplastic-like [Malus domestica]
MD05G1242400	[L]	Replication, recombination and repair	--	K02542|0|mdm:103435330|DNA replication licensing factor MCM6-like; K02542 DNA replication licensing factor MCM6 [EC:3.6.4.12] (A)	[L]	Replication, recombination and repair	DNA replication licensing factor MCM6 OS=Arabidopsis thaliana GN=MCM6 PE=1 SV=1	L	Replication, recombination and repair	PREDICTED: DNA replication licensing factor MCM6-like [Malus domestica]
MD04G1045400	--	--	--	--	--	--	--	S	Function unknown	PREDICTED: uncharacterized protein LOC103432754 [Malus domestica]
MD16G1062500	[F]	Nucleotide transport and metabolism	--	--	[R]	General function prediction only	Protein KTI12 homolog OS=Arabidopsis thaliana GN=KTI12 PE=1 SV=1	F	Nucleotide transport and metabolism	PREDICTED: protein KTI12 homolog isoform X1 [Malus domestica]
MD13G1065700	--	--	--	--	--	--	Nodulin-related protein 1 OS=Arabidopsis thaliana GN=NRP1 PE=1 SV=1	S	Function unknown	PREDICTED: sarcoplasmic reticulum histidine-rich calcium-binding protein-like [Malus domestica]
MD16G1120200	--	--	--	--	[R]	General function prediction only	RanBP2-type zinc finger protein At1g67325 OS=Arabidopsis thaliana GN=At1g67325 PE=1 SV=1	S	Function unknown	PREDICTED: ranBP2-type zinc finger protein At1g67325-like [Malus domestica]
MD15G1330500	[E]	Amino acid transport and metabolism	--	K00827|0|pxb:103928969|alanine--glyoxylate aminotransferase 2 homolog 1, mitochondrial; K00827 alanine-glyoxylate transaminase / (R)-3-amino-2-methylpropionate-pyruvate transaminase [EC:2.6.1.44 2.6.1.40] (A)	[E]	Amino acid transport and metabolism	Alanine--glyoxylate aminotransferase 2 homolog 1, mitochondrial OS=Arabidopsis thaliana GN=AGT2 PE=1 SV=1	E	Amino acid transport and metabolism	PREDICTED: alanine--glyoxylate aminotransferase 2 homolog 1, mitochondrial [Pyrus x bretschneideri]
MD11G1303900	[H]	Coenzyme transport and metabolism	Molecular Function: dephospho-CoA kinase activity (GO:0004140);; Molecular Function: ATP binding (GO:0005524);; Biological Process: coenzyme A biosynthetic process (GO:0015937);;	K00859|1.14958e-151|mdm:103430208|uncharacterized protein T05G5.5-like; K00859 dephospho-CoA kinase [EC:2.7.1.24] (A)	[H]	Coenzyme transport and metabolism	Dephospho-CoA kinase OS=Arabidopsis thaliana GN=COAE PE=2 SV=1	H	Coenzyme transport and metabolism	PREDICTED: dephospho-CoA kinase-like [Malus domestica]
MD16G1281400	[H]	Coenzyme transport and metabolism	--	K13941|0|mdm:103446277|folic acid synthesis protein fol1-like; K13941 2-amino-4-hydroxy-6-hydroxymethyldihydropteridine diphosphokinase / dihydropteroate synthase [EC:2.7.6.3 2.5.1.15] (A)	[H]	Coenzyme transport and metabolism	Folate synthesis bifunctional protein, mitochondrial OS=Pisum sativum GN=MitHPPK/DHPS PE=1 SV=1	H	Coenzyme transport and metabolism	PREDICTED: folate synthesis bifunctional protein, mitochondrial-like [Malus domestica]
MD16G1004600	[E]	Amino acid transport and metabolism	--	K01354|0|mdm:103403381|prolyl endopeptidase-like; K01354 oligopeptidase B [EC:3.4.21.83] (A)	[O]	Posttranslational modification, protein turnover, chaperones	--	E	Amino acid transport and metabolism	PREDICTED: protease 2 [Malus domestica]
MD00G1111900	[RTKL]	--	Biological Process: MAPK cascade (GO:0000165);; Molecular Function: MAP kinase activity (GO:0004707);; Molecular Function: ATP binding (GO:0005524);; Biological Process: protein phosphorylation (GO:0006468);;	K04371|0|mdm:103439212|mitogen-activated protein kinase homolog MMK2-like; K04371 mitogen-activated protein kinase 1/3 [EC:2.7.11.24] (A)	[T]	Signal transduction mechanisms	Mitogen-activated protein kinase homolog MMK2 OS=Medicago sativa GN=MMK2 PE=2 SV=1	T	Signal transduction mechanisms	PREDICTED: mitogen-activated protein kinase homolog MMK2 [Pyrus x bretschneideri]
MD09G1037400	--	--	--	--	--	--	Protein ALTERED XYLOGLUCAN 4-like OS=Arabidopsis thaliana GN=AXY4L PE=2 SV=1	S	Function unknown	PREDICTED: protein ALTERED XYLOGLUCAN 4-like isoform X1 [Malus domestica]
MD16G1001800	--	--	--	K17592|0|mdm:103403403|sacsin; K17592 sacsin (A)	--	--	--	S	Function unknown	PREDICTED: LOW QUALITY PROTEIN: sacsin [Malus domestica]
MD13G1023300	--	--	Biological Process: defense response (GO:0006952);; Biological Process: response to biotic stimulus (GO:0009607);;	--	--	--	MLP-like protein 329 OS=Arabidopsis thaliana GN=MLP329 PE=2 SV=1	S	Function unknown	PREDICTED: MLP-like protein 28 [Malus domestica]
MD14G1191800	--	--	Molecular Function: metal ion binding (GO:0046872);;	K16276|0|pxb:103935401|uncharacterized LOC103935401; K16276 zinc finger protein-like protein (A)	[R]	General function prediction only	Zinc finger protein BRUTUS-like At1g74770 OS=Arabidopsis thaliana GN=At1g74770 PE=2 SV=1	S	Function unknown	PREDICTED: uncharacterized protein LOC103935401 isoform X1 [Pyrus x bretschneideri]
MD05G1049700	[O]	Posttranslational modification, protein turnover, chaperones	Molecular Function: ATP binding (GO:0005524);; Cellular Component: mitochondrion (GO:0005739);; Biological Process: protein folding (GO:0006457);; Biological Process: response to stress (GO:0006950);; Molecular Function: unfolded protein binding (GO:0051082);;	K04043|0|mdm:103436566|heat shock 70 kDa protein, mitochondrial; K04043 molecular chaperone DnaK (A)	[O]	Posttranslational modification, protein turnover, chaperones	Heat shock 70 kDa protein, mitochondrial OS=Phaseolus vulgaris PE=2 SV=1	O	Posttranslational modification, protein turnover, chaperones	PREDICTED: heat shock 70 kDa protein, mitochondrial [Malus domestica]
MD03G1157000	--	--	--	K11886|0|pxb:103935501|proteasome-associated protein ECM29 homolog; K11886 proteasome component ECM29 (A)	[S]	Function unknown	--	S	Function unknown	PREDICTED: proteasome-associated protein ECM29 homolog isoform X2 [Pyrus x bretschneideri]
MD12G1233100	[RTKL]	--	--	K08819|0|mdm:103450991|probable serine/threonine-protein kinase At1g54610; K08819 cyclin-dependent kinase 12/13 [EC:2.7.11.22 2.7.11.23] (A)	[D]	Cell cycle control, cell division, chromosome partitioning	Probable serine/threonine-protein kinase At1g54610 OS=Arabidopsis thaliana GN=At1g54610 PE=1 SV=1	T	Signal transduction mechanisms	PREDICTED: probable serine/threonine-protein kinase At1g54610 isoform X2 [Malus domestica]
MD17G1003300	[I]	Lipid transport and metabolism	--	K01895|0|mdm:103416930|acetate--CoA ligase ACS, chloroplastic/glyoxysomal-like; K01895 acetyl-CoA synthetase [EC:6.2.1.1] (A)	[I]	Lipid transport and metabolism	Acetyl-coenzyme A synthetase, chloroplastic/glyoxysomal OS=Arabidopsis thaliana GN=ACS PE=1 SV=1	I	Lipid transport and metabolism	PREDICTED: acetyl-coenzyme A synthetase, chloroplastic/glyoxysomal-like isoform X1 [Malus domestica]
MD01G1069400	[O]	Posttranslational modification, protein turnover, chaperones	Molecular Function: metalloendopeptidase activity (GO:0004222);; Cellular Component: vacuole (GO:0005773);; Cellular Component: endoplasmic reticulum (GO:0005783);; Biological Process: proteolysis (GO:0006508);; Cellular Component: membrane (GO:0016020);; Biological Process: CAAX-box protein processing (GO:0071586);;	K06013|0|pxb:103941340|CAAX prenyl protease 1 homolog; K06013 STE24 endopeptidase [EC:3.4.24.84] (A)	[R]	General function prediction only	CAAX prenyl protease 1 homolog OS=Arabidopsis thaliana GN=FACE1 PE=1 SV=1	O	Posttranslational modification, protein turnover, chaperones	PREDICTED: CAAX prenyl protease 1 homolog [Pyrus x bretschneideri]
MD02G1300300	--	--	--	--	[I]	Lipid transport and metabolism	--	S	Function unknown	PREDICTED: protein PNS1-like [Malus domestica]
MD03G1000200	[Q]	Secondary metabolites biosynthesis, transport and catabolism	Molecular Function: copper ion binding (GO:0005507);; Molecular Function: oxidoreductase activity (GO:0016491);; Biological Process: oxidation-reduction process (GO:0055114);;	K00423|0|mdm:103437331|L-ascorbate oxidase homolog; K00423 L-ascorbate oxidase [EC:1.10.3.3] (A)	[Q]	Secondary metabolites biosynthesis, transport and catabolism	L-ascorbate oxidase homolog OS=Brassica napus GN=Bp10 PE=2 SV=1	Q	Secondary metabolites biosynthesis, transport and catabolism	PREDICTED: L-ascorbate oxidase homolog [Malus domestica]
MD11G1265400	--	--	--	--	--	--	IRK-interacting protein OS=Arabidopsis thaliana GN=IRKI PE=1 SV=1	S	Function unknown	PREDICTED: IRK-interacting protein-like [Malus domestica]
MD16G1281800	[G]	Carbohydrate transport and metabolism	--	--	--	--	Probable starch synthase 4, chloroplastic/amyloplastic OS=Arabidopsis thaliana GN=SS4 PE=2 SV=1	G	Carbohydrate transport and metabolism	probable starch synthase 4, chloroplastic/amyloplastic isoform X2 [Prunus persica]
MD00G1018600	--	--	Molecular Function: protein domain specific binding (GO:0019904);;	K06630|0|pxb:103941885|14-3-3-like protein 16R; K06630 14-3-3 protein epsilon (A)	[O]	Posttranslational modification, protein turnover, chaperones	14-3-3 protein 6 OS=Solanum lycopersicum GN=TFT6 PE=2 SV=2	T	Signal transduction mechanisms	PREDICTED: 14-3-3-like protein 16R [Pyrus x bretschneideri]
MD08G1248200	[E]	Amino acid transport and metabolism	--	--	[E]	Amino acid transport and metabolism	Protein NRT1/ PTR FAMILY 4.3 OS=Arabidopsis thaliana GN=NPF4.3 PE=2 SV=1	E	Amino acid transport and metabolism	PREDICTED: protein NRT1/ PTR FAMILY 4.3-like [Malus domestica]
MD07G1080300	--	--	--	--	--	--	B3 domain-containing protein Os04g0386900 OS=Oryza sativa subsp. japonica GN=Os04g0386900 PE=2 SV=3	S	Function unknown	PREDICTED: B3 domain-containing protein Os04g0386900-like [Malus domestica]
MD08G1158500	[U]	Intracellular trafficking, secretion, and vesicular transport	--	K03070|3.71543e-47|mdm:103441922|protein translocase subunit SECA2, chloroplastic; K03070 preprotein translocase subunit SecA (A)	--	--	Protein translocase subunit SECA2, chloroplastic OS=Arabidopsis thaliana GN=SECA2 PE=2 SV=1	U	Intracellular trafficking, secretion, and vesicular transport	PREDICTED: LOW QUALITY PROTEIN: protein translocase subunit SECA2, chloroplastic [Malus domestica]
MD14G1212000	--	--	--	--	--	--	--	S	Function unknown	PREDICTED: uncharacterized protein LOC103930651 [Pyrus x bretschneideri]
MD01G1049200	[U]	Intracellular trafficking, secretion, and vesicular transport	Molecular Function: GTP binding (GO:0005525);; Cellular Component: signal recognition particle, endoplasmic reticulum targeting (GO:0005786);; Biological Process: GTP catabolic process (GO:0006184);; Biological Process: rRNA processing (GO:0006364);; Biological Process: SRP-dependent cotranslational protein targeting to membrane (GO:0006614);; Cellular Component: chloroplast thylakoid (GO:0009534…	K03110|0|pxb:103965557|cell division protein FtsY homolog, chloroplastic-like; K03110 fused signal recognition particle receptor (A)	[U]	Intracellular trafficking, secretion, and vesicular transport	Cell division protein FtsY homolog, chloroplastic OS=Arabidopsis thaliana GN=CPFTSY PE=1 SV=2	U	Intracellular trafficking, secretion, and vesicular transport	PREDICTED: cell division protein FtsY homolog, chloroplastic-like [Pyrus x bretschneideri]
MD15G1317800	--	--	--	--	--	--	--	S	Function unknown	PREDICTED: uncharacterized protein LOC103401616 [Malus domestica]
MD01G1144300	--	--	Biological Process: response to stress (GO:0006950);;	K13993|7.86536e-36|mdm:103417894|18.1 kDa class I heat shock protein-like; K13993 HSP20 family protein (A)	[O]	Posttranslational modification, protein turnover, chaperones	18.1 kDa class I heat shock protein OS=Arabidopsis thaliana GN=HSP18.1 PE=1 SV=1	O	Posttranslational modification, protein turnover, chaperones	PREDICTED: 18.1 kDa class I heat shock protein-like [Malus domestica]
MD06G1137700	[J]	Translation, ribosomal structure and biogenesis	--	K02936|1.87074e-158|pxb:103936169|60S ribosomal protein L7a-like; K02936 large subunit ribosomal protein L7Ae (A)	[J]	Translation, ribosomal structure and biogenesis	60S ribosomal protein L7a-2 OS=Oryza sativa subsp. japonica GN=RPL7A-2 PE=2 SV=1	J	Translation, ribosomal structure and biogenesis	PREDICTED: 60S ribosomal protein L7a-1-like isoform X2 [Malus domestica]
MD15G1351000	[L]	Replication, recombination and repair	--	--	[L]	Replication, recombination and repair	Replication factor C subunit 1 OS=Oryza sativa subsp. japonica GN=RFC1 PE=2 SV=2	S	Function unknown	PREDICTED: uncharacterized protein LOC103424490 [Malus domestica]
MD00G1050700	--	--	--	K13210|0|pxb:103967991|far upstream element-binding protein 2-like; K13210 far upstream element-binding protein (A)	[A]	RNA processing and modification	Protein BTR1 OS=Arabidopsis thaliana GN=BTR1 PE=1 SV=1	S	Function unknown	PREDICTED: far upstream element-binding protein 2-like isoform X1 [Pyrus x bretschneideri]
MD10G1078200	--	--	Molecular Function: kinase activity (GO:0016301);; Molecular Function: phosphotransferase activity, alcohol group as acceptor (GO:0016773);; Biological Process: phosphatidylinositol phosphorylation (GO:0046854);; Biological Process: phosphatidylinositol-mediated signaling (GO:0048015);;	K00888|0|pxb:103963120|phosphatidylinositol 4-kinase alpha 1-like; K00888 phosphatidylinositol 4-kinase [EC:2.7.1.67] (A)	[T]	Signal transduction mechanisms	Phosphatidylinositol 4-kinase alpha 1 OS=Arabidopsis thaliana GN=PI4KA1 PE=1 SV=2	BDLTU	--	PREDICTED: phosphatidylinositol 4-kinase alpha 1-like [Pyrus x bretschneideri]
MD16G1227200	[E]	Amino acid transport and metabolism	--	K01703|0|mdm:103403601|3-isopropylmalate dehydratase large subunit; K01703 3-isopropylmalate/(R)-2-methylmalate dehydratase large subunit [EC:4.2.1.33 4.2.1.35] (A)	[E]	Amino acid transport and metabolism	3-isopropylmalate dehydratase large subunit, chloroplastic OS=Arabidopsis thaliana GN=IIL1 PE=1 SV=1	E	Amino acid transport and metabolism	PREDICTED: 3-isopropylmalate dehydratase large subunit [Malus domestica]
MD03G1079900	--	--	--	--	[T]	Signal transduction mechanisms	--	S	Function unknown	PREDICTED: trithorax group protein osa-like [Malus domestica]
MD08G1006800	[M]	Cell wall/membrane/envelope biogenesis	--	--	[M]	Cell wall/membrane/envelope biogenesis	Mechanosensitive ion channel protein 8 OS=Arabidopsis thaliana GN=MSL8 PE=2 SV=2	M	Cell wall/membrane/envelope biogenesis	mechanosensitive ion channel protein 8-like [Prunus avium]
MD02G1137500	[G]	Carbohydrate transport and metabolism	Molecular Function: beta-galactosidase activity (GO:0004565);; Biological Process: carbohydrate metabolic process (GO:0005975);; Molecular Function: carbohydrate binding (GO:0030246);;	--	[G]	Carbohydrate transport and metabolism	Beta-galactosidase 3 OS=Arabidopsis thaliana GN=BGAL3 PE=2 SV=1	G	Carbohydrate transport and metabolism	PREDICTED: beta-galactosidase 3 [Malus domestica]
MD03G1133300	--	--	--	--	[E]	Amino acid transport and metabolism	GABA transporter 1 OS=Arabidopsis thaliana GN=GAT1 PE=1 SV=1	E	Amino acid transport and metabolism	PREDICTED: GABA transporter 1-like [Malus domestica]
MD16G1251700	--	--	--	--	--	--	--	S	Function unknown	PREDICTED: uncharacterized protein LOC103450571 isoform X6 [Malus domestica]
MD12G1039700	--	--	--	--	--	--	--	S	Function unknown	PREDICTED: uncharacterized protein LOC103339528 [Prunus mume]
MD03G1208900	--	--	--	K15283|0|mdm:103407960|glucose-6-phosphate/phosphate translocator 1, chloroplastic-like; K15283 solute carrier family 35, member E1 (A)	[GE]	--	Glucose-6-phosphate/phosphate translocator 1, chloroplastic OS=Arabidopsis thaliana GN=GPT1 PE=2 SV=1	S	Function unknown	PREDICTED: glucose-6-phosphate/phosphate translocator 1, chloroplastic-like [Malus domestica]
MD09G1082200	--	--	--	--	--	--	--	S	Function unknown	PREDICTED: transmembrane protein 33 homolog [Malus domestica]
MD06G1037500	[G]	Carbohydrate transport and metabolism	Biological Process: maltose metabolic process (GO:0000023);; Molecular Function: trehalose-phosphatase activity (GO:0004805);; Biological Process: trehalose biosynthetic process (GO:0005992);; Molecular Function: transferase activity, transferring glycosyl groups (GO:0016757);; Biological Process: starch biosynthetic process (GO:0019252);; Biological Process: positive regulation of catalytic acti…	K16055|0|pxb:103960443|alpha,alpha-trehalose-phosphate synthase [UDP-forming] 5; K16055 trehalose 6-phosphate synthase/phosphatase [EC:2.4.1.15 3.1.3.12] (A)	[G]	Carbohydrate transport and metabolism	Alpha,alpha-trehalose-phosphate synthase [UDP-forming] 5 OS=Arabidopsis thaliana GN=TPS5 PE=1 SV=2	G	Carbohydrate transport and metabolism	PREDICTED: alpha,alpha-trehalose-phosphate synthase [UDP-forming] 5 [Pyrus x bretschneideri]
MD17G1217000	--	--	--	--	[R]	General function prediction only	--	S	Function unknown	PREDICTED: F-box/LRR-repeat protein 13 isoform X2 [Malus domestica]
MD15G1003800	--	--	Molecular Function: DNA binding (GO:0003677);; Cellular Component: nucleus (GO:0005634);; Molecular Function: oxidoreductase activity (GO:0016491);; Biological Process: histone deacetylation (GO:0016575);; Biological Process: root development (GO:0048364);; Biological Process: histone H3-K4 methylation (GO:0051568);; Biological Process: oxidation-reduction process (GO:0055114);;	K11450|0|mdm:103450327|lysine-specific histone demethylase 1 homolog 1-like; K11450 lysine-specific histone demethylase 1 [EC:1.-.-.-] (A)	[Q]	Secondary metabolites biosynthesis, transport and catabolism	Lysine-specific histone demethylase 1 homolog 1 OS=Arabidopsis thaliana GN=LDL1 PE=1 SV=1	S	Function unknown	PREDICTED: lysine-specific histone demethylase 1 homolog 1-like [Malus domestica]
MD14G1182200	--	--	Cellular Component: membrane (GO:0016020);;	--	--	--	CASP-like protein 4A3 OS=Arabidopsis thaliana GN=At2g36330 PE=2 SV=1	S	Function unknown	PREDICTED: CASP-like protein 4A3 [Pyrus x bretschneideri]
MD05G1082600	--	--	--	--	--	--	--	S	Function unknown	PREDICTED: uncharacterized protein LOC103937999 [Pyrus x bretschneideri]
MD05G1204100	--	--	Cellular Component: nucleosome (GO:0000786);; Molecular Function: DNA binding (GO:0003677);; Cellular Component: nucleolus (GO:0005730);; Cellular Component: mitochondrion (GO:0005739);; Biological Process: nucleosome assembly (GO:0006334);;	K11275|8.8595e-24|mdm:103419889|histone H1-like; K11275 histone H1/5 (A)	--	--	Histone H1.2 OS=Arabidopsis thaliana GN=At2g30620 PE=1 SV=1	S	Function unknown	PREDICTED: histone H1-like [Malus domestica]
MD16G1001600	[R]	General function prediction only	Molecular Function: organic cyclic compound binding (GO:0097159);; Molecular Function: heterocyclic compound binding (GO:1901363);;	K11294|1.41235e-177|mdm:103403401|nucleolin 1-like; K11294 nucleolin (A)	[K]	Transcription	Nucleolin 2 OS=Oryza sativa subsp. japonica GN=Os04g0620700 PE=2 SV=2	S	Function unknown	PREDICTED: nucleolin 1-like [Malus domestica]
MD01G1162300	--	--	--	--	--	--	--	S	Function unknown	PREDICTED: uncharacterized protein LOC103437828 [Malus domestica]
MD07G1119600	[E]	Amino acid transport and metabolism	Molecular Function: 3-phosphoshikimate 1-carboxyvinyltransferase activity (GO:0003866);; Biological Process: aromatic amino acid family biosynthetic process (GO:0009073);; Biological Process: chorismate biosynthetic process (GO:0009423);; Cellular Component: chloroplast (GO:0009507);; Biological Process: response to herbicide (GO:0009635);;	K00800|0|mdm:103428057|3-phosphoshikimate 1-carboxyvinyltransferase 2; K00800 3-phosphoshikimate 1-carboxyvinyltransferase [EC:2.5.1.19] (A)	[E]	Amino acid transport and metabolism	3-phosphoshikimate 1-carboxyvinyltransferase, chloroplastic OS=Petunia hybrida PE=1 SV=1	E	Amino acid transport and metabolism	PREDICTED: 3-phosphoshikimate 1-carboxyvinyltransferase 2 [Malus domestica]
MD14G1125200	[RTKL]	--	--	--	[T]	Signal transduction mechanisms	Serine/threonine-protein kinase BLUS1 OS=Arabidopsis thaliana GN=BLUS1 PE=1 SV=1	T	Signal transduction mechanisms	PREDICTED: serine/threonine-protein kinase BLUS1 isoform X1 [Malus domestica]
MD02G1118500	[T]	Signal transduction mechanisms	--	--	[I]	Lipid transport and metabolism	Phosphoinositide phosphatase SAC7 OS=Arabidopsis thaliana GN=SAC7 PE=2 SV=1	T	Signal transduction mechanisms	PREDICTED: phosphoinositide phosphatase SAC7 [Pyrus x bretschneideri]
MD09G1255900	--	--	--	--	[T]	Signal transduction mechanisms	--	S	Function unknown	PREDICTED: lisH domain and HEAT repeat-containing protein KIAA1468 [Malus domestica]
MD13G1261900	[O]	Posttranslational modification, protein turnover, chaperones	--	--	[O]	Posttranslational modification, protein turnover, chaperones	Protein SUPPRESSOR OF MAX2 1 OS=Arabidopsis thaliana GN=SMAX1 PE=1 SV=1	O	Posttranslational modification, protein turnover, chaperones	PREDICTED: protein SUPPRESSOR OF MAX2 1 [Pyrus x bretschneideri]
MD17G1031900	--	--	--	--	--	--	DNA (cytosine-5)-methyltransferase DRM2 OS=Oryza sativa subsp. japonica GN=DRM2 PE=1 SV=1	L	Replication, recombination and repair	PREDICTED: DNA (cytosine-5)-methyltransferase DRM2-like [Pyrus x bretschneideri]
MD11G1286000	--	--	--	--	--	--	--	--	--	PREDICTED: uncharacterized protein LOC103957243 [Pyrus x bretschneideri]
MD04G1225500	--	--	--	K16277|0|mdm:103434171|E3 ubiquitin protein ligase DRIP2-like; K16277 E3 ubiquitin-protein ligase DRIP [EC:6.3.2.19] (A)	[S]	Function unknown	E3 ubiquitin protein ligase DRIP2 OS=Arabidopsis thaliana GN=DRIP2 PE=1 SV=1	S	Function unknown	PREDICTED: E3 ubiquitin protein ligase DRIP2-like [Malus domestica]
MD15G1212500	--	--	--	--	--	--	--	S	Function unknown	PREDICTED: SH3 and multiple ankyrin repeat domains protein 1 [Malus domestica]
MD14G1227900	[R]	General function prediction only	--	K11866|0|mdm:103455508|AMSH-like ubiquitin thioesterase 1; K11866 STAM-binding protein [EC:3.4.19.12] (A)	[T]	Signal transduction mechanisms	AMSH-like ubiquitin thioesterase 1 OS=Arabidopsis thaliana GN=AMSH1 PE=2 SV=1	S	Function unknown	PREDICTED: AMSH-like ubiquitin thioesterase 1 [Malus domestica]
MD15G1021000	[OC]	--	Biological Process: glycerol ether metabolic process (GO:0006662);; Molecular Function: electron carrier activity (GO:0009055);; Molecular Function: protein disulfide oxidoreductase activity (GO:0015035);; Biological Process: cell redox homeostasis (GO:0045454);;	K03671|3.46591e-45|mdm:103450436|thioredoxin H-type 2-like; K03671 thioredoxin 1 (A)	[O]	Posttranslational modification, protein turnover, chaperones	Thioredoxin H-type 1 OS=Nicotiana tabacum PE=2 SV=1	O	Posttranslational modification, protein turnover, chaperones	PREDICTED: thioredoxin H-type 2-like [Malus domestica]
MD16G1154200	[C]	Energy production and conversion	--	--	--	--	--	C	Energy production and conversion	PREDICTED: uncharacterized protein LOC103403537 isoform X2 [Malus domestica]
MD12G1043900	--	--	--	--	--	--	--	S	Function unknown	PREDICTED: uncharacterized protein LOC103423226 isoform X1 [Malus domestica]
MD05G1250200	--	--	--	--	[GMW]	--	Probable arabinosyltransferase ARAD1 OS=Arabidopsis thaliana GN=ARAD1 PE=1 SV=1	S	Function unknown	PREDICTED: probable arabinosyltransferase ARAD1 [Malus domestica]
MD00G1085900	[R]	General function prediction only	Molecular Function: ubiquitin-protein transferase activity (GO:0004842);; Biological Process: ubiquitin-dependent protein catabolic process (GO:0006511);; Molecular Function: zinc ion binding (GO:0008270);; Biological Process: lateral root formation (GO:0010311);; Biological Process: negative regulation of ethylene biosynthetic process (GO:0010366);; Biological Process: brassinosteroid biosynthet…	--	--	--	Probable E3 ubiquitin-protein ligase XBOS32 OS=Oryza sativa subsp. japonica GN=XBOS32 PE=2 SV=2	S	Function unknown	PREDICTED: probable E3 ubiquitin-protein ligase XBOS32 [Pyrus x bretschneideri]
MD04G1205000	[E]	Amino acid transport and metabolism	Biological Process: cellular process (GO:0009987);; Molecular Function: hydrolase activity (GO:0016787);;	K01262|0|pxb:103965353|probable Xaa-Pro aminopeptidase P; K01262 Xaa-Pro aminopeptidase [EC:3.4.11.9] (A)	[E]	Amino acid transport and metabolism	--	E	Amino acid transport and metabolism	PREDICTED: probable Xaa-Pro aminopeptidase P [Pyrus x bretschneideri]
MD15G1283100	--	--	--	--	--	--	--	S	Function unknown	PREDICTED: uncharacterized protein LOC103401372 isoform X1 [Malus domestica]
MD09G1175500	--	--	--	--	[I]	Lipid transport and metabolism	Phosphoinositide phosphatase SAC2 OS=Arabidopsis thaliana GN=SAC2 PE=2 SV=1	T	Signal transduction mechanisms	PREDICTED: phosphoinositide phosphatase SAC2-like [Malus domestica]
MD14G1048000	--	--	--	--	[S]	Function unknown	Rhomboid-like protein 15 OS=Arabidopsis thaliana GN=RBL15 PE=1 SV=2	S	Function unknown	PREDICTED: rhomboid-like protein 15 isoform X3 [Malus domestica]
MD14G1230200	--	--	--	--	[O]	Posttranslational modification, protein turnover, chaperones	Probable E3 ubiquitin-protein ligase RHG1A OS=Arabidopsis thaliana GN=RHG1A PE=2 SV=1	O	Posttranslational modification, protein turnover, chaperones	PREDICTED: uncharacterized protein LOC103950620 [Pyrus x bretschneideri]
MD07G1305600	[R]	General function prediction only	--	K03363|0|mdm:103439996|cell division cycle 20.2, cofactor of APC complex-like; K03363 cell division cycle 20, cofactor of APC complex (A)	[DO]	--	Cell division cycle 20.1, cofactor of APC complex OS=Arabidopsis thaliana GN=CDC20-1 PE=1 SV=1	D	Cell cycle control, cell division, chromosome partitioning	PREDICTED: cell division cycle 20.2, cofactor of APC complex-like [Malus domestica]
MD15G1387600	--	--	--	--	[U]	Intracellular trafficking, secretion, and vesicular transport	BEACH domain-containing protein B OS=Arabidopsis thaliana GN=BCHB PE=4 SV=1	S	Function unknown	PREDICTED: BEACH domain-containing protein B isoform X1 [Malus domestica]
MD10G1183500	--	--	--	--	--	--	Rho-N domain-containing protein 1, chloroplastic OS=Arabidopsis thaliana GN=RHON1 PE=1 SV=1	S	Function unknown	PREDICTED: rho-N domain-containing protein 1, chloroplastic [Malus domestica]
MD10G1264000	[MG]	--	Molecular Function: nucleotide binding (GO:0000166);; Cellular Component: chloroplast thylakoid membrane (GO:0009535);; Cellular Component: chloroplast envelope (GO:0009941);; Biological Process: myo-inositol hexakisphosphate biosynthetic process (GO:0010264);; Cellular Component: plastoglobule (GO:0010287);;	--	[G]	Carbohydrate transport and metabolism	Uncharacterized protein At2g34460, chloroplastic OS=Arabidopsis thaliana GN=At2g34460 PE=2 SV=1	GM	--	PREDICTED: uncharacterized protein At2g34460, chloroplastic isoform X2 [Malus domestica]
MD14G1236800	[R]	General function prediction only	--	K14026|0|mdm:103455632|protein sel-1 homolog 2-like; K14026 SEL1 protein (A)	[MOT]	--	ERAD-associated E3 ubiquitin-protein ligase component HRD3A OS=Arabidopsis thaliana GN=HRD3A PE=1 SV=1	S	Function unknown	PREDICTED: ERAD-associated E3 ubiquitin-protein ligase component HRD3A-like [Malus domestica]
MD07G1042200	--	--	--	K13104|2.13595e-161|mdm:103410015|zinc finger protein 830-like; K13104 zinc finger protein 830 (A)	[S]	Function unknown	--	S	Function unknown	PREDICTED: LOW QUALITY PROTEIN: zinc finger protein 830-like [Malus domestica]
MD16G1227300	--	--	--	--	--	--	Mediator of RNA polymerase II transcription subunit 8 OS=Arabidopsis thaliana GN=MED8 PE=1 SV=1	S	Function unknown	mediator of RNA polymerase II transcription subunit 8 [Prunus persica]
MD02G1176000	--	--	Molecular Function: DNA binding (GO:0003677);; Molecular Function: sequence-specific DNA binding transcription factor activity (GO:0003700);; Cellular Component: nucleus (GO:0005634);; Biological Process: regulation of transcription, DNA-templated (GO:0006355);;	K09284|0|mdm:103445097|AHAP2, AP2D40; floral homeotic protein APETALA 2; K09284 AP2-like factor, euAP2 lineage (A)	--	--	Floral homeotic protein APETALA 2 OS=Arabidopsis thaliana GN=AP2 PE=1 SV=1	K	Transcription	floral homeotic protein APETALA 2 [Malus domestica]
MD13G1267300	[H]	Coenzyme transport and metabolism	Molecular Function: adenosylmethionine-8-amino-7-oxononanoate transaminase activity (GO:0004015);; Molecular Function: dethiobiotin synthase activity (GO:0004141);; Cellular Component: mitochondrion (GO:0005739);; Biological Process: DNA replication initiation (GO:0006270);; Biological Process: regulation of DNA replication (GO:0006275);; Biological Process: DNA methylation (GO:0006306);; Biologi…	K00833|0|mdm:103447394|bifunctional dethiobiotin synthetase/7,8-diamino-pelargonic acid aminotransferase, mitochondrial; K00833 adenosylmethionine-8-amino-7-oxononanoate aminotransferase [EC:2.6.1.62] (A)	[E]	Amino acid transport and metabolism	Bifunctional dethiobiotin synthetase/7,8-diamino-pelargonic acid aminotransferase, mitochondrial OS=Arabidopsis thaliana GN=BIO3-BIO1 PE=1 SV=1	E	Amino acid transport and metabolism	PREDICTED: bifunctional dethiobiotin synthetase/7,8-diamino-pelargonic acid aminotransferase, mitochondrial [Malus domestica]
MD13G1228800	[RTKL]	--	Molecular Function: protein serine/threonine kinase activity (GO:0004674);; Molecular Function: ATP binding (GO:0005524);; Biological Process: protein phosphorylation (GO:0006468);; Cellular Component: integral component of membrane (GO:0016021);;	--	--	--	Probable leucine-rich repeat receptor-like protein kinase At2g33170 OS=Arabidopsis thaliana GN=At2g33170 PE=2 SV=1	S	Function unknown	PREDICTED: probable leucine-rich repeat receptor-like protein kinase At2g33170 [Pyrus x bretschneideri]
MD06G1228200	--	--	Biological Process: maltose metabolic process (GO:0000023);; Biological Process: pentose-phosphate shunt (GO:0006098);; Cellular Component: chloroplast thylakoid membrane (GO:0009535);; Biological Process: chloroplast relocation (GO:0009902);; Biological Process: thylakoid membrane organization (GO:0010027);; Biological Process: cytochrome b6f complex assembly (GO:0010190);; Biological Process: p…	--	--	--	--	S	Function unknown	PREDICTED: uncharacterized protein LOC103438095 isoform X1 [Malus domestica]
MD03G1203100	[F]	Nucleotide transport and metabolism	--	K01952|0|pxb:103960355|probable phosphoribosylformylglycinamidine synthase, chloroplastic/mitochondrial; K01952 phosphoribosylformylglycinamidine synthase [EC:6.3.5.3] (A)	[F]	Nucleotide transport and metabolism	Probable phosphoribosylformylglycinamidine synthase, chloroplastic/mitochondrial OS=Arabidopsis thaliana GN=At1g74260 PE=2 SV=3	F	Nucleotide transport and metabolism	PREDICTED: probable phosphoribosylformylglycinamidine synthase, chloroplastic/mitochondrial [Pyrus x bretschneideri]
MD06G1160100	--	--	--	--	[S]	Function unknown	Probable Ufm1-specific protease OS=Arabidopsis thaliana GN=At3g48380 PE=1 SV=2	O	Posttranslational modification, protein turnover, chaperones	PREDICTED: probable Ufm1-specific protease [Malus domestica]
MD17G1269300	[RTKL]	--	Molecular Function: nucleotide binding (GO:0000166);; Molecular Function: protein kinase activity (GO:0004672);; Biological Process: metabolic process (GO:0008152);; Cellular Component: membrane (GO:0016020);; Molecular Function: oxidoreductase activity (GO:0016491);;	--	--	--	Probable inactive receptor kinase At1g48480 OS=Arabidopsis thaliana GN=RKL1 PE=2 SV=1	T	Signal transduction mechanisms	PREDICTED: probable inactive receptor kinase At1g48480 [Malus domestica]
MD06G1137600	--	--	--	K17046|0|mdm:103437514|protein DEK-like; K17046 protein DEK (A)	[B]	Chromatin structure and dynamics	--	S	Function unknown	PREDICTED: protein DEK-like isoform X2 [Malus domestica]
MD15G1003900	--	--	Biological Process: response to stress (GO:0006950);; Biological Process: response to water (GO:0009415);;	--	--	--	Dehydrin COR47 OS=Arabidopsis thaliana GN=COR47 PE=1 SV=2	--	--	dehydrin COR47-like [Malus domestica]
MD12G1063100	[M]	Cell wall/membrane/envelope biogenesis	Molecular Function: tetrahydrofolylpolyglutamate synthase activity (GO:0004326);; Molecular Function: ATP binding (GO:0005524);; Cellular Component: cytoplasm (GO:0005737);; Biological Process: regulation of cell shape (GO:0008360);; Molecular Function: UDP-N-acetylmuramoylalanine-D-glutamate ligase activity (GO:0008764);; Biological Process: tetrahydrofolylpolyglutamate biosynthetic process (GO:…	--	--	--	--	M	Cell wall/membrane/envelope biogenesis	PREDICTED: uncharacterized protein LOC103939821 [Pyrus x bretschneideri]
MD13G1170300	[O]	Posttranslational modification, protein turnover, chaperones	Biological Process: ubiquitin-dependent protein catabolic process (GO:0006511);; Cellular Component: cullin-RING ubiquitin ligase complex (GO:0031461);; Molecular Function: ubiquitin protein ligase binding (GO:0031625);;	K03347|0|mdm:103452934|cullin-1-like; K03347 cullin 1 (A)	[D]	Cell cycle control, cell division, chromosome partitioning	Cullin-1 OS=Arabidopsis thaliana GN=CUL1 PE=1 SV=1	O	Posttranslational modification, protein turnover, chaperones	PREDICTED: cullin-1-like [Malus domestica]
MD12G1066700	[I]	Lipid transport and metabolism	Molecular Function: 1-acylglycerol-3-phosphate O-acyltransferase activity (GO:0003841);; Cellular Component: endoplasmic reticulum (GO:0005783);; Biological Process: phosphatidylglycerol biosynthetic process (GO:0006655);;	K13523|0|mdm:103454364|1-acyl-sn-glycerol-3-phosphate acyltransferase 2; K13523 lysophosphatidic acid acyltransferase / lysophosphatidylinositol acyltransferase [EC:2.3.1.51 2.3.1.-] (A)	[I]	Lipid transport and metabolism	1-acyl-sn-glycerol-3-phosphate acyltransferase 2 OS=Arabidopsis thaliana GN=LPAT2 PE=1 SV=2	I	Lipid transport and metabolism	PREDICTED: 1-acyl-sn-glycerol-3-phosphate acyltransferase 2 [Malus domestica]
MD15G1379900	[RTKL]	--	Molecular Function: protein serine/threonine kinase activity (GO:0004674);; Molecular Function: ATP binding (GO:0005524);; Biological Process: protein phosphorylation (GO:0006468);;	--	[T]	Signal transduction mechanisms	Serine/threonine-protein kinase PEPKR2 OS=Arabidopsis thaliana GN=PEPKR2 PE=2 SV=1	T	Signal transduction mechanisms	PREDICTED: serine/threonine-protein kinase PEPKR2 [Malus domestica]
MD16G1251400	--	--	--	--	--	--	--	S	Function unknown	PREDICTED: uncharacterized protein LOC103418072 isoform X1 [Malus domestica]
MD01G1045900	--	--	--	--	--	--	--	S	Function unknown	PREDICTED: uncharacterized protein LOC103417568 [Malus domestica]
MD04G1148400	--	--	Molecular Function: voltage-gated potassium channel activity (GO:0005249);; Biological Process: potassium ion transport (GO:0006813);; Cellular Component: voltage-gated potassium channel complex (GO:0008076);; Biological Process: protein homooligomerization (GO:0051260);;	--	[R]	General function prediction only	BTB/POZ domain-containing protein At3g09030 OS=Arabidopsis thaliana GN=At3g09030 PE=2 SV=1	S	Function unknown	PREDICTED: BTB/POZ domain-containing protein At3g09030-like [Malus domestica]
MD17G1128600	--	--	--	--	--	--	--	S	Function unknown	PREDICTED: golgin subfamily B member 1 [Malus domestica]
MD11G1224500	[R]	General function prediction only	--	--	[T]	Signal transduction mechanisms	--	S	Function unknown	PREDICTED: TBC1 domain family member 15 [Malus domestica]
MD16G1176100	[IQ]	--	--	--	[CIQ]	--	Acyl carrier protein 1, chloroplastic OS=Casuarina glauca GN=ACP1 PE=2 SV=1	I	Lipid transport and metabolism	PREDICTED: acyl carrier protein 1, chloroplastic-like isoform X2 [Malus domestica]
MD01G1185900	--	--	--	--	--	--	Protein trichome birefringence-like 18 OS=Arabidopsis thaliana GN=TBL18 PE=2 SV=1	S	Function unknown	PREDICTED: protein YLS7 [Malus domestica]
MD08G1001300	[V]	Defense mechanisms	Molecular Function: ATP binding (GO:0005524);; Biological Process: ATP catabolic process (GO:0006200);; Cellular Component: membrane (GO:0016020);; Molecular Function: ATPase activity, coupled to transmembrane movement of substances (GO:0042626);;	--	[Q]	Secondary metabolites biosynthesis, transport and catabolism	ABC transporter G family member 14 OS=Arabidopsis thaliana GN=ABCG14 PE=2 SV=1	V	Defense mechanisms	PREDICTED: ABC transporter G family member 14-like isoform X2 [Malus domestica]
MD11G1027500	[G]	Carbohydrate transport and metabolism	Biological Process: carbohydrate metabolic process (GO:0005975);; Molecular Function: amygdalin beta-glucosidase activity (GO:0047668);;	K01188|0|mdm:103447126|beta-glucosidase 12-like; K01188 beta-glucosidase [EC:3.2.1.21] (A)	[G]	Carbohydrate transport and metabolism	Beta-glucosidase 12 OS=Oryza sativa subsp. indica GN=BGLU12 PE=3 SV=1	G	Carbohydrate transport and metabolism	PREDICTED: beta-glucosidase 12-like [Malus domestica]
MD00G1148300	[R]	General function prediction only	--	--	[R]	General function prediction only	Probable RNA-binding protein ARP1 OS=Arabidopsis thaliana GN=ARP1 PE=2 SV=1	S	Function unknown	PREDICTED: RNA-binding protein 24-A-like isoform X1 [Pyrus x bretschneideri]
MD05G1075500	--	--	Molecular Function: nucleic acid binding (GO:0003676);; Cellular Component: nucleus (GO:0005634);; Molecular Function: zinc ion binding (GO:0008270);;	K13220|2.92679e-130|pxb:103947763|RNA-binding protein 5; K13220 WW domain-binding protein 4 (A)	[A]	RNA processing and modification	Zinc finger protein ZOP1 OS=Arabidopsis thaliana GN=ZOP1 PE=1 SV=1	S	Function unknown	PREDICTED: zinc finger protein ZOP1 [Pyrus x bretschneideri]
MD07G1261100	[S]	Function unknown	--	--	--	--	Protein SUPPRESSOR OF npr1-1, CONSTITUTIVE 1 OS=Arabidopsis thaliana GN=SNC1 PE=1 SV=5	S	Function unknown	PREDICTED: TMV resistance protein N-like [Malus domestica]
MD15G1159800	--	--	Molecular Function: sequence-specific DNA binding transcription factor activity (GO:0003700);; Cellular Component: nucleus (GO:0005634);; Biological Process: regulation of transcription, DNA-templated (GO:0006355);; Molecular Function: sequence-specific DNA binding (GO:0043565);;	--	[K]	Transcription	Homeobox protein knotted-1-like 3 OS=Arabidopsis thaliana GN=KNAT3 PE=1 SV=1	K	Transcription	PREDICTED: homeobox protein knotted-1-like 13 isoform X1 [Pyrus x bretschneideri]
MD08G1187400	--	--	Molecular Function: protein domain specific binding (GO:0019904);;	K06630|0|mdm:103448635|14-3-3-like protein; K06630 14-3-3 protein epsilon (A)	[O]	Posttranslational modification, protein turnover, chaperones	14-3-3-like protein OS=Oenothera elata subsp. hookeri PE=2 SV=2	T	Signal transduction mechanisms	PREDICTED: 14-3-3-like protein [Malus domestica]
MD17G1191800	[OC]	--	--	K09580|0|mdm:103405456|protein disulfide isomerase-like 1-6; K09580 protein disulfide-isomerase A1 [EC:5.3.4.1] (A)	[O]	Posttranslational modification, protein turnover, chaperones	Protein disulfide isomerase-like 1-6 OS=Arabidopsis thaliana GN=PDIL1-6 PE=2 SV=1	O	Posttranslational modification, protein turnover, chaperones	PREDICTED: protein disulfide isomerase-like 1-6 [Malus domestica]
MD15G1130500	--	--	--	--	[S]	Function unknown	--	S	Function unknown	PREDICTED: neurochondrin [Malus domestica]
MD13G1193800	--	--	Biological Process: protein transport (GO:0015031);; Cellular Component: membrane (GO:0016020);; Biological Process: establishment of localization in cell (GO:0051649);;	--	--	--	Preprotein translocase subunit SECE1 OS=Arabidopsis thaliana GN=SECE1 PE=1 SV=1	U	Intracellular trafficking, secretion, and vesicular transport	PREDICTED: preprotein translocase subunit SECE1 [Pyrus x bretschneideri]
MD08G1206400	--	--	--	--	[K]	Transcription	MADS-box transcription factor 27 OS=Oryza sativa subsp. japonica GN=MADS27 PE=2 SV=2	K	Transcription	PREDICTED: MADS-box transcription factor 23-like isoform X2 [Malus domestica]
MD08G1244900	--	--	--	--	[UZ]	--	Vacuolar protein sorting-associated protein 52 A OS=Arabidopsis thaliana GN=VPS52 PE=1 SV=1	U	Intracellular trafficking, secretion, and vesicular transport	PREDICTED: vacuolar protein sorting-associated protein 52 A [Malus domestica]
MD15G1015100	--	--	--	--	--	--	Transcription factor RF2a OS=Oryza sativa subsp. japonica GN=RF2a PE=1 SV=1	K	Transcription	PREDICTED: transcription factor RF2a-like [Malus domestica]
MD01G1100600	[G]	Carbohydrate transport and metabolism	--	K01728|0|pxb:103958414|probable pectate lyase 13; K01728 pectate lyase [EC:4.2.2.2] (A)	--	--	Probable pectate lyase 12 OS=Arabidopsis thaliana GN=At3g53190 PE=2 SV=2	G	Carbohydrate transport and metabolism	PREDICTED: probable pectate lyase 12 [Malus domestica]
MD09G1111400	--	--	--	--	--	--	--	--	--	PREDICTED: uncharacterized protein LOC103421559 [Malus domestica]
MD00G1089100	[R]	General function prediction only	--	K06995|1.37007e-90|mdm:103429347|uncharacterized LOC103429347; K06995 (A)	--	--	--	S	Function unknown	PREDICTED: uncharacterized protein LOC103429347 [Malus domestica]
MD15G1243400	[O]	Posttranslational modification, protein turnover, chaperones	Molecular Function: threonine-type endopeptidase activity (GO:0004298);; Cellular Component: nucleus (GO:0005634);; Cellular Component: cytoplasm (GO:0005737);; Biological Process: ubiquitin-dependent protein catabolic process (GO:0006511);; Cellular Component: proteasome core complex, alpha-subunit complex (GO:0019773);;	K02731|7.78723e-162|pxb:103967790|proteasome subunit alpha type-7; K02731 20S proteasome subunit alpha 4 [EC:3.4.25.1] (A)	[O]	Posttranslational modification, protein turnover, chaperones	Proteasome subunit alpha type-7 OS=Cicer arietinum GN=PAD1 PE=2 SV=1	O	Posttranslational modification, protein turnover, chaperones	PREDICTED: proteasome subunit alpha type-7 [Malus domestica]
MD01G1212200	[R]	General function prediction only	--	--	[S]	Function unknown	U3 snoRNP-associated protein-like YAOH OS=Oryza sativa subsp. japonica GN=Os03g0625900 PE=2 SV=1	S	Function unknown	PREDICTED: WD repeat-containing protein 91 homolog [Malus domestica]
MD05G1187100	[V]	Defense mechanisms	--	--	[Q]	Secondary metabolites biosynthesis, transport and catabolism	Pleiotropic drug resistance protein 1 OS=Nicotiana tabacum GN=PDR1 PE=2 SV=1	V	Defense mechanisms	PREDICTED: pleiotropic drug resistance protein 1-like [Malus domestica]
MD15G1042400	--	--	--	--	--	--	L10-interacting MYB domain-containing protein OS=Arabidopsis thaliana GN=LIMYB PE=1 SV=1	S	Function unknown	PREDICTED: uncharacterized protein LOC103442253 [Malus domestica]
MD06G1077900	[J]	Translation, ribosomal structure and biogenesis	--	--	--	--	30S ribosomal protein S1, chloroplastic OS=Pyropia yezoensis GN=rps1 PE=3 SV=2	J	Translation, ribosomal structure and biogenesis	PREDICTED: uncharacterized protein LOC103437355 isoform X2 [Malus domestica]
MD14G1122500	--	--	Molecular Function: transferase activity, transferring glycosyl groups (GO:0016757);;	K08237|0|pxb:103943818|hydroquinone glucosyltransferase-like; K08237 hydroquinone glucosyltransferase [EC:2.4.1.218] (A)	[GC]	--	Hydroquinone glucosyltransferase OS=Rauvolfia serpentina GN=AS PE=1 SV=1	S	Function unknown	PREDICTED: hydroquinone glucosyltransferase-like [Pyrus x bretschneideri]
MD07G1132600	--	--	--	--	--	--	--	S	Function unknown	PREDICTED: uncharacterized protein LOC103941336 isoform X1 [Pyrus x bretschneideri]
MD07G1036600	--	--	--	--	--	--	Protein LNK2 OS=Arabidopsis thaliana GN=LNK2 PE=1 SV=1	S	Function unknown	PREDICTED: protein LNK2-like isoform X1 [Malus domestica]
MD06G1071100	--	--	Molecular Function: sequence-specific DNA binding transcription factor activity (GO:0003700);; Cellular Component: nucleus (GO:0005634);; Biological Process: regulation of transcription, DNA-templated (GO:0006355);; Molecular Function: sequence-specific DNA binding (GO:0043565);;	--	[K]	Transcription	Homeobox protein HD1 OS=Brassica napus GN=HD1 PE=2 SV=1	K	Transcription	PREDICTED: homeobox protein HD1-like [Pyrus x bretschneideri]
MD09G1279600	--	--	--	--	--	--	--	S	Function unknown	PREDICTED: uncharacterized protein LOC103956791 [Pyrus x bretschneideri]
MD05G1153300	[RTKL]	--	Molecular Function: protein kinase activity (GO:0004672);; Molecular Function: ATP binding (GO:0005524);; Biological Process: protein phosphorylation (GO:0006468);; Cellular Component: integral component of membrane (GO:0016021);;	--	--	--	Probably inactive leucine-rich repeat receptor-like protein kinase At5g48380 OS=Arabidopsis thaliana GN=At5g48380 PE=1 SV=1	T	Signal transduction mechanisms	PREDICTED: probably inactive leucine-rich repeat receptor-like protein kinase At5g48380 [Malus domestica]
MD04G1037200	[J]	Translation, ribosomal structure and biogenesis	--	K01870|0|mdm:103435434|probable isoleucine--tRNA ligase, cytoplasmic; K01870 isoleucyl-tRNA synthetase [EC:6.1.1.5] (A)	[J]	Translation, ribosomal structure and biogenesis	Isoleucine--tRNA ligase, cytoplasmic OS=Arabidopsis thaliana GN=At4g10320 PE=2 SV=1	J	Translation, ribosomal structure and biogenesis	PREDICTED: isoleucine--tRNA ligase, cytoplasmic [Malus domestica]
MD01G1113500	--	--	--	K14327|0|mdm:103417711|regulator of nonsense transcripts UPF2-like; K14327 regulator of nonsense transcripts 2 (A)	[A]	RNA processing and modification	Regulator of nonsense transcripts UPF2 OS=Arabidopsis thaliana GN=UPF2 PE=2 SV=1	S	Function unknown	PREDICTED: regulator of nonsense transcripts UPF2-like [Malus domestica]
MD08G1235100	--	--	Cellular Component: endoplasmic reticulum (GO:0005783);;	--	[S]	Function unknown	--	S	Function unknown	PREDICTED: LOW QUALITY PROTEIN: uncharacterized protein LOC103946303 [Pyrus x bretschneideri]
MD05G1087100	[T]	Signal transduction mechanisms	Molecular Function: protein tyrosine phosphatase activity (GO:0004725);; Biological Process: peptidyl-tyrosine dephosphorylation (GO:0035335);;	K01110|0|mdm:103405697|phosphatidylinositol 3,4,5-trisphosphate 3-phosphatase and dual-specificity protein phosphatase PTEN; K01110 phosphatidylinositol-3,4,5-trisphosphate 3-phosphatase and dual-specificity protein phosphatase PTEN [EC:3.1.3.16 3.1.3.48 3.1.3.67] (A)	[TR]	--	Phosphatidylinositol 3,4,5-trisphosphate 3-phosphatase and protein-tyrosine-phosphatase PTEN2A OS=Arabidopsis thaliana GN=PTEN2A PE=1 SV=1	T	Signal transduction mechanisms	PREDICTED: phosphatidylinositol 3,4,5-trisphosphate 3-phosphatase and protein-tyrosine-phosphatase PTEN2A [Malus domestica]
MD12G1064400	--	--	--	--	--	--	--	S	Function unknown	PREDICTED: uncharacterized protein LOC103420212 [Malus domestica]
MD16G1112700	[RTKL]	--	--	K08818|0|pxb:103949906|cyclin-dependent kinase G-2; K08818 cell division cycle 2-like [EC:2.7.11.22] (A)	[R]	General function prediction only	Cyclin-dependent kinase G-2 OS=Oryza sativa subsp. japonica GN=CDKG-2 PE=2 SV=2	T	Signal transduction mechanisms	PREDICTED: cyclin-dependent kinase G-2 [Pyrus x bretschneideri]
MD06G1085100	[M]	Cell wall/membrane/envelope biogenesis	--	--	--	--	--	M	Cell wall/membrane/envelope biogenesis	PREDICTED: uncharacterized protein LOC103938470 [Pyrus x bretschneideri]
MD08G1227800	--	--	--	--	--	--	--	S	Function unknown	PREDICTED: uncharacterized protein LOC103319093 isoform X1 [Prunus mume]
MD16G1213200	[KL]	--	Molecular Function: DNA binding (GO:0003677);; Molecular Function: helicase activity (GO:0004386);; Molecular Function: ATP binding (GO:0005524);; Molecular Function: zinc ion binding (GO:0008270);; Cellular Component: chloroplast envelope (GO:0009941);; Molecular Function: transferase activity (GO:0016740);;	K15505|0|mdm:103404038|putative SWI/SNF-related matrix-associated actin-dependent regulator of chromatin subfamily A member 3-like 3; K15505 DNA repair protein RAD5 [EC:3.6.4.-] (A)	[KL]	--	Putative SWI/SNF-related matrix-associated actin-dependent regulator of chromatin subfamily A member 3-like 3 OS=Arabidopsis thaliana GN=At5g43530 PE=3 SV=1	L	Replication, recombination and repair	PREDICTED: putative SWI/SNF-related matrix-associated actin-dependent regulator of chromatin subfamily A member 3-like 3 [Malus domestica]
MD12G1022300	--	--	--	--	--	--	Transcription factor HBP-1a OS=Triticum aestivum PE=2 SV=1	S	Function unknown	PREDICTED: uncharacterized protein LOC103963637 [Pyrus x bretschneideri]
MD10G1329100	[IQR]	--	Molecular Function: oxidoreductase activity (GO:0016491);; Biological Process: oxidation-reduction process (GO:0055114);;	K11147|3.69048e-142|mdm:103446766|tropinone reductase-like 3; K11147 dehydrogenase/reductase SDR family member 4 [EC:1.1.-.-] (A)	[R]	General function prediction only	Tropinone reductase-like 3 OS=Erythroxylum coca PE=2 SV=1	S	Function unknown	PREDICTED: tropinone reductase-like 3 [Malus domestica]
MD15G1201900	--	--	Biological Process: protein transport (GO:0015031);;	K12194|4.15658e-103|mdm:103400745|vacuolar protein sorting-associated protein 32 homolog 2-like; K12194 charged multivesicular body protein 4 (A)	[U]	Intracellular trafficking, secretion, and vesicular transport	Vacuolar protein sorting-associated protein 32 homolog 1 OS=Arabidopsis thaliana GN=VPS32.1 PE=1 SV=1	U	Intracellular trafficking, secretion, and vesicular transport	PREDICTED: vacuolar protein sorting-associated protein 32 homolog 2 [Malus domestica]
MD06G1029200	--	--	--	--	--	--	--	S	Function unknown	PREDICTED: uncharacterized protein LOC103437002 [Malus domestica]
MD16G1172600	--	--	--	--	[BDT]	--	Protein ALWAYS EARLY 3 OS=Arabidopsis thaliana GN=ALY3 PE=1 SV=1	S	Function unknown	PREDICTED: protein ALWAYS EARLY 3 [Malus domestica]
MD17G1180500	[O]	Posttranslational modification, protein turnover, chaperones	--	K04485|0|pxb:103930311|uncharacterized LOC103930311; K04485 DNA repair protein RadA/Sms (A)	--	--	--	O	Posttranslational modification, protein turnover, chaperones	PREDICTED: uncharacterized protein LOC103930311 [Pyrus x bretschneideri]
MD14G1012300	[V]	Defense mechanisms	Biological Process: drug transmembrane transport (GO:0006855);; Molecular Function: drug transmembrane transporter activity (GO:0015238);; Molecular Function: antiporter activity (GO:0015297);; Cellular Component: membrane (GO:0016020);;	K03327|0|mdm:103453920|protein TRANSPARENT TESTA 12-like; K03327 multidrug resistance protein, MATE family (A)	[R]	General function prediction only	Protein DETOXIFICATION 21 OS=Arabidopsis thaliana GN=DTX21 PE=1 SV=1	V	Defense mechanisms	PREDICTED: protein DETOXIFICATION 21-like [Malus domestica]
MD02G1056800	--	--	--	--	--	--	Transcription factor bHLH68 OS=Arabidopsis thaliana GN=BHLH68 PE=2 SV=2	K	Transcription	PREDICTED: transcription factor bHLH68-like isoform X1 [Pyrus x bretschneideri]
MD00G1078400	--	--	--	--	[Z]	Cytoskeleton	--	S	Function unknown	PREDICTED: IST1-like protein [Malus domestica]
MD00G1113700	--	--	--	--	--	--	F-box/kelch-repeat protein At5g42360 OS=Arabidopsis thaliana GN=At5g42360 PE=2 SV=1	S	Function unknown	PREDICTED: F-box/kelch-repeat protein At5g42360-like [Pyrus x bretschneideri]
MD11G1211400	[H]	Coenzyme transport and metabolism	Molecular Function: ATP binding (GO:0005524);; Biological Process: metabolic process (GO:0008152);; Molecular Function: Mo-molybdopterin cofactor sulfurase activity (GO:0008265);; Molecular Function: transferase activity (GO:0016740);;	K11996|0|mdm:103448372|adenylyltransferase and sulfurtransferase MOCS3; K11996 adenylyltransferase and sulfurtransferase (A)	[H]	Coenzyme transport and metabolism	Adenylyltransferase and sulfurtransferase MOCS3 OS=Arabidopsis thaliana GN=MOCS3 PE=2 SV=1	P	Inorganic ion transport and metabolism	PREDICTED: adenylyltransferase and sulfurtransferase MOCS3 [Malus domestica]
MD17G1268700	[E]	Amino acid transport and metabolism	Molecular Function: glutamate-ammonia ligase activity (GO:0004356);; Biological Process: glutamine biosynthetic process (GO:0006542);;	K01915|0|mdm:103417448|glutamine synthetase cytosolic isozyme; K01915 glutamine synthetase [EC:6.3.1.2] (A)	[E]	Amino acid transport and metabolism	Glutamine synthetase cytosolic isozyme OS=Medicago sativa PE=2 SV=1	E	Amino acid transport and metabolism	PREDICTED: glutamine synthetase cytosolic isozyme [Malus domestica]
MD02G1090100	--	--	Cellular Component: chloroplast (GO:0009507);;	--	--	--	Uncharacterized protein At1g04910 OS=Arabidopsis thaliana GN=At1g04910 PE=2 SV=1	S	Function unknown	PREDICTED: uncharacterized protein At1g04910-like [Pyrus x bretschneideri]
MD07G1124600	[I]	Lipid transport and metabolism	Molecular Function: phospholipase D activity (GO:0004630);; Biological Process: metabolic process (GO:0008152);; Molecular Function: N-acylphosphatidylethanolamine-specific phospholipase D activity (GO:0070290);;	K01115|0|mdm:103439116|phospholipase D gamma 1-like; K01115 phospholipase D1/2 [EC:3.1.4.4] (A)	[I]	Lipid transport and metabolism	Phospholipase D beta 1 OS=Arabidopsis thaliana GN=PLDBETA1 PE=1 SV=4	I	Lipid transport and metabolism	PREDICTED: phospholipase D gamma 1-like [Malus domestica]
MD11G1149500	--	--	--	--	--	--	Increased DNA methylation 1 OS=Arabidopsis thaliana GN=IDM1 PE=1 SV=1	S	Function unknown	PREDICTED: uncharacterized protein LOC103448037 isoform X1 [Malus domestica]
MD12G1044100	--	--	--	--	[R]	General function prediction only	Putative pentatricopeptide repeat-containing protein At5g06400, mitochondrial OS=Arabidopsis thaliana GN=At5g06400 PE=3 SV=1	S	Function unknown	PREDICTED: putative pentatricopeptide repeat-containing protein At5g06400, mitochondrial [Malus domestica]
MD00G1156200	[G]	Carbohydrate transport and metabolism	Biological Process: carbohydrate metabolic process (GO:0005975);; Molecular Function: glycogen phosphorylase activity (GO:0008184);; Molecular Function: pyridoxal phosphate binding (GO:0030170);;	K00688|0|pxb:103951000|alpha-1,4 glucan phosphorylase L isozyme, chloroplastic/amyloplastic-like; K00688 starch phosphorylase [EC:2.4.1.1] (A)	[G]	Carbohydrate transport and metabolism	Alpha-1,4 glucan phosphorylase L isozyme, chloroplastic/amyloplastic OS=Ipomoea batatas PE=2 SV=1	G	Carbohydrate transport and metabolism	PREDICTED: alpha-1,4 glucan phosphorylase L isozyme, chloroplastic/amyloplastic-like [Pyrus x bretschneideri]
MD00G1170900	--	--	--	--	[R]	General function prediction only	Pentatricopeptide repeat-containing protein At2g35030, mitochondrial OS=Arabidopsis thaliana GN=PCMP-E15 PE=2 SV=1	S	Function unknown	PREDICTED: pentatricopeptide repeat-containing protein At2g35030, mitochondrial [Malus domestica]
MD02G1308700	--	--	--	--	[R]	General function prediction only	Histone-lysine N-methyltransferase ATX3 OS=Arabidopsis thaliana GN=ATX3 PE=2 SV=2	S	Function unknown	PREDICTED: uncharacterized protein LOC103413091 [Malus domestica]
MD14G1028500	[G]	Carbohydrate transport and metabolism	--	K01193|0|pmum:103341753|beta-fructofuranosidase, insoluble isoenzyme 1-like; K01193 beta-fructofuranosidase [EC:3.2.1.26] (A)	[G]	Carbohydrate transport and metabolism	Beta-fructofuranosidase, insoluble isoenzyme 1 OS=Daucus carota GN=INV1 PE=1 SV=1	G	Carbohydrate transport and metabolism	PREDICTED: beta-fructofuranosidase, insoluble isoenzyme 1-like [Pyrus x bretschneideri]
MD15G1267200	[E]	Amino acid transport and metabolism	Molecular Function: aminopeptidase activity (GO:0004177);; Cellular Component: cytosol (GO:0005829);; Cellular Component: plasma membrane (GO:0005886);; Biological Process: protein N-linked glycosylation (GO:0006487);; Biological Process: lipid transport (GO:0006869);; Biological Process: intra-Golgi vesicle-mediated transport (GO:0006891);; Biological Process: auxin polar transport (GO:0009926);…	K01262|0|mdm:103401223|probable Xaa-Pro aminopeptidase P; K01262 Xaa-Pro aminopeptidase [EC:3.4.11.9] (A)	[E]	Amino acid transport and metabolism	--	E	Amino acid transport and metabolism	PREDICTED: probable Xaa-Pro aminopeptidase P [Malus domestica]
MD04G1168300	--	--	--	--	--	--	Protein SCAR2 OS=Arabidopsis thaliana GN=SCAR2 PE=1 SV=1	S	Function unknown	PREDICTED: LOW QUALITY PROTEIN: protein SCAR2-like [Malus domestica]
MD17G1131000	--	--	--	K15210|0|pxb:103955513|snRNA-activating protein complex subunit-like; K15210 snRNA-activating protein complex subunit 3 (A)	[K]	Transcription	snRNA-activating protein complex subunit OS=Arabidopsis thaliana GN=SRD2 PE=1 SV=1	S	Function unknown	PREDICTED: snRNA-activating protein complex subunit-like [Pyrus x bretschneideri]
MD01G1152500	--	--	Biological Process: lipid metabolic process (GO:0006629);; Molecular Function: hydrolase activity, acting on ester bonds (GO:0016788);;	--	[I]	Lipid transport and metabolism	GDSL esterase/lipase CPRD49 OS=Arabidopsis thaliana GN=CPRD49 PE=2 SV=1	E	Amino acid transport and metabolism	PREDICTED: GDSL esterase/lipase CPRD49 isoform X2 [Malus domestica]
MD03G1219600	--	--	--	--	--	--	--	S	Function unknown	PREDICTED: uncharacterized protein LOC103430128 [Malus domestica]
MD13G1121000	--	--	Cellular Component: nuclear envelope (GO:0005635);; Biological Process: protein import into nucleus (GO:0006606);; Biological Process: lipid transport (GO:0006869);; Biological Process: intra-Golgi vesicle-mediated transport (GO:0006891);; Molecular Function: Ran GTPase binding (GO:0008536);; Molecular Function: protein transporter activity (GO:0008565);; Biological Process: lithium ion transport…	--	[U]	Intracellular trafficking, secretion, and vesicular transport	Nuclear transport factor 2 OS=Arabidopsis thaliana GN=NTF2 PE=1 SV=1	U	Intracellular trafficking, secretion, and vesicular transport	PREDICTED: nuclear transport factor 2-like [Malus domestica]
MD01G1185700	--	--	--	--	--	--	AT-hook motif nuclear-localized protein 1 OS=Arabidopsis thaliana GN=AHL1 PE=1 SV=1	S	Function unknown	PREDICTED: AT-hook motif nuclear-localized protein 7-like [Malus domestica]
MD17G1182800	[A]	RNA processing and modification	--	K14376|0|mdm:103430288|poly(A) polymerase type 3-like; K14376 poly(A) polymerase [EC:2.7.7.19] (A)	[A]	RNA processing and modification	Nuclear poly(A) polymerase 4 OS=Arabidopsis thaliana GN=PAPS4 PE=1 SV=1	A	RNA processing and modification	PREDICTED: nuclear poly(A) polymerase 4-like isoform X2 [Malus domestica]
MD04G1005500	[T]	Signal transduction mechanisms	Molecular Function: myosin heavy chain kinase activity (GO:0016905);;	--	[R]	General function prediction only	Transcriptional corepressor LEUNIG_HOMOLOG OS=Arabidopsis thaliana GN=LUH PE=1 SV=1	K	Transcription	PREDICTED: transcriptional corepressor LEUNIG_HOMOLOG-like isoform X3 [Malus domestica]
MD12G1107400	[G]	Carbohydrate transport and metabolism	Molecular Function: transporter activity (GO:0005215);; Biological Process: transport (GO:0006810);; Cellular Component: integral component of membrane (GO:0016021);;	K09873|4.22619e-132|mdm:103413676|aquaporin TIP1-1-like; K09873 aquaporin TIP (A)	[G]	Carbohydrate transport and metabolism	Aquaporin TIP1-1 OS=Arabidopsis thaliana GN=TIP1-1 PE=1 SV=1	G	Carbohydrate transport and metabolism	aquaporin TIP1 [Malus prunifolia]
MD03G1121600	[KL]	--	--	K11642|0|mdm:103423147|helicase protein MOM1-like; K11642 chromodomain-helicase-DNA-binding protein 3 [EC:3.6.4.12] (A)	[R]	General function prediction only	Helicase protein MOM1 OS=Arabidopsis thaliana GN=MOM1 PE=1 SV=1	L	Replication, recombination and repair	PREDICTED: helicase protein MOM1-like [Malus domestica]
MD08G1043100	--	--	Molecular Function: catalytic activity (GO:0003824);; Molecular Function: calcium ion binding (GO:0005509);; Biological Process: metabolic process (GO:0008152);;	K06268|2.19664e-178|mdm:103440590|calcineurin B-like protein 10; K06268 serine/threonine-protein phosphatase 2B regulatory subunit (A)	[T]	Signal transduction mechanisms	Calcineurin B-like protein 10 OS=Arabidopsis thaliana GN=CBL10 PE=1 SV=1	DTZ	--	PREDICTED: calcineurin B-like protein 10 [Malus domestica]
MD03G1170900	[R]	General function prediction only	--	--	[JD]	--	--	S	Function unknown	PREDICTED: uncharacterized protein LOC103426964 isoform X1 [Malus domestica]
MD05G1110700	--	--	--	--	--	--	Uncharacterized protein At3g49720 OS=Arabidopsis thaliana GN=At3g49720 PE=2 SV=1	S	Function unknown	PREDICTED: uncharacterized protein At3g49720-like [Malus domestica]
MD15G1373800	[J]	Translation, ribosomal structure and biogenesis	--	K01875|0|pxb:103962155|serine--tRNA ligase, mitochondrial-like; K01875 seryl-tRNA synthetase [EC:6.1.1.11] (A)	[J]	Translation, ribosomal structure and biogenesis	Serine--tRNA ligase, chloroplastic/mitochondrial OS=Arabidopsis thaliana GN=OVA7 PE=2 SV=1	J	Translation, ribosomal structure and biogenesis	PREDICTED: serine--tRNA ligase, chloroplastic/mitochondrial-like [Pyrus x bretschneideri]
MD11G1125700	--	--	Molecular Function: metal ion binding (GO:0046872);;	--	[O]	Posttranslational modification, protein turnover, chaperones	ATP-dependent RNA helicase DEAH11, chloroplastic OS=Arabidopsis thaliana GN=At4g01020 PE=3 SV=1	S	Function unknown	PREDICTED: uncharacterized protein LOC103934299 [Pyrus x bretschneideri]
MD14G1201100	[C]	Energy production and conversion	Biological Process: photosynthesis (GO:0015979);; Biological Process: chlorophyll biosynthetic process (GO:0015995);; Molecular Function: oxidoreductase activity, acting on the CH-CH group of donors, NAD or NADP as acceptor (GO:0016628);; Molecular Function: geranylgeranyl reductase activity (GO:0045550);; Biological Process: oxidation-reduction process (GO:0055114);;	K10960|0|mdm:103424544|geranylgeranyl diphosphate reductase, chloroplastic-like; K10960 geranylgeranyl reductase [EC:1.3.1.83] (A)	--	--	Geranylgeranyl diphosphate reductase, chloroplastic OS=Nicotiana tabacum GN=CHLP PE=2 SV=1	C	Energy production and conversion	PREDICTED: geranylgeranyl diphosphate reductase, chloroplastic-like [Malus domestica]
MD06G1071200	--	--	--	--	[S]	Function unknown	--	S	Function unknown	PREDICTED: protein FAM63B-like isoform X1 [Malus domestica]
MD14G1166400	[R]	General function prediction only	Molecular Function: myosin heavy chain kinase activity (GO:0016905);;	K17890|0|mdm:103455055|protein tipD-like; K17890 autophagy-related protein 16, animal type (A)	[R]	General function prediction only	Autophagy-related protein 16 OS=Arabidopsis thaliana GN=ATG16 PE=2 SV=1	S	Function unknown	PREDICTED: autophagy-related protein 16-like [Malus domestica]
MD17G1170400	--	--	--	--	--	--	--	S	Function unknown	PREDICTED: uncharacterized protein LOC103401755 isoform X2 [Malus domestica]
MD05G1325800	--	--	Molecular Function: inositol hexakisphosphate binding (GO:0000822);; Biological Process: auxin-activated signaling pathway (GO:0009734);;	K14485|0|mdm:103427835|protein TRANSPORT INHIBITOR RESPONSE 1-like; K14485 transport inhibitor response 1 (A)	[R]	General function prediction only	Protein TRANSPORT INHIBITOR RESPONSE 1 OS=Arabidopsis thaliana GN=TIR1 PE=1 SV=2	S	Function unknown	PREDICTED: protein TRANSPORT INHIBITOR RESPONSE 1-like [Malus domestica]
MD09G1151600	--	--	--	--	[D]	Cell cycle control, cell division, chromosome partitioning	Protein MEI2-like 2 OS=Oryza sativa subsp. japonica GN=ML2 PE=2 SV=1	S	Function unknown	PREDICTED: protein MEI2-like 2 isoform X1 [Pyrus x bretschneideri]
MD02G1115000	--	--	--	--	--	--	--	S	Function unknown	PREDICTED: uncharacterized protein LOC103454614 [Malus domestica]
MD05G1269300	--	--	--	--	--	--	--	S	Function unknown	PREDICTED: uncharacterized protein LOC103952353 [Pyrus x bretschneideri]
MD17G1060400	--	--	--	--	[T]	Signal transduction mechanisms	Nuclear transport factor 2 OS=Oryza sativa subsp. japonica GN=NTF2 PE=2 SV=1	S	Function unknown	PREDICTED: ras GTPase-activating protein-binding protein 2-like [Malus domestica]
MD12G1120600	[O]	Posttranslational modification, protein turnover, chaperones	Cellular Component: nucleus (GO:0005634);; Cellular Component: cytoplasm (GO:0005737);;	K08770|0|sot:102587932|polyubiquitin-A-like; K08770 ubiquitin C (A)	[OR]	--	Polyubiquitin OS=Petroselinum crispum GN=PCUBI4-2 PE=3 SV=1	O	Posttranslational modification, protein turnover, chaperones	polyubiquitin [Sesamum indicum]
MD16G1036500	[I]	Lipid transport and metabolism	Molecular Function: catalytic activity (GO:0003824);; Cellular Component: plasma membrane (GO:0005886);; Biological Process: response to stress (GO:0006950);; Biological Process: metabolic process (GO:0008152);;	--	[I]	Lipid transport and metabolism	Lipid phosphate phosphatase 1 OS=Arabidopsis thaliana GN=LPP1 PE=2 SV=2	I	Lipid transport and metabolism	PREDICTED: lipid phosphate phosphatase 1 isoform X1 [Malus domestica]
MD11G1285000	--	--	Biological Process: regulation of cyclin-dependent protein serine/threonine kinase activity (GO:0000079);; Molecular Function: kinase activity (GO:0016301);; Molecular Function: protein kinase binding (GO:0019901);;	--	[R]	General function prediction only	Cyclin-P3-1 OS=Oryza sativa subsp. japonica GN=CYCP3-1 PE=3 SV=1	S	Function unknown	PREDICTED: cyclin-P3-1 [Malus domestica]
MD10G1096200	[K]	Transcription	Molecular Function: DNA binding (GO:0003677);; Molecular Function: DNA-directed RNA polymerase activity (GO:0003899);; Biological Process: transcription, DNA-templated (GO:0006351);; Molecular Function: protein dimerization activity (GO:0046983);;	K03011|0|pxb:103942049|DNA-directed RNA polymerases II, IV and V subunit 3-like; K03011 DNA-directed RNA polymerase II subunit RPB3 (A)	[K]	Transcription	DNA-directed RNA polymerases II, IV and V subunit 3 OS=Arabidopsis thaliana GN=NRPB3 PE=1 SV=1	K	Transcription	PREDICTED: DNA-directed RNA polymerases II, IV and V subunit 3-like [Pyrus x bretschneideri]
MD17G1134800	[ER]	--	Molecular Function: 4-hydroxyphenylpyruvate dioxygenase activity (GO:0003868);; Biological Process: aromatic amino acid family metabolic process (GO:0009072);; Molecular Function: metal ion binding (GO:0046872);; Biological Process: oxidation-reduction process (GO:0055114);;	K00457|0|mdm:103417220|4-hydroxyphenylpyruvate dioxygenase-like; K00457 4-hydroxyphenylpyruvate dioxygenase [EC:1.13.11.27] (A)	[E]	Amino acid transport and metabolism	4-hydroxyphenylpyruvate dioxygenase OS=Arabidopsis thaliana GN=HPD PE=1 SV=2	E	Amino acid transport and metabolism	PREDICTED: 4-hydroxyphenylpyruvate dioxygenase-like [Malus domestica]
MD16G1004000	[R]	General function prediction only	--	K12606|0|mdm:103403393|cell differentiation protein RCD1 homolog; K12606 CCR4-NOT transcription complex subunit 9 (A)	[R]	General function prediction only	--	S	Function unknown	PREDICTED: cell differentiation protein RCD1 homolog isoform X1 [Malus domestica]
MD16G1159400	[TK]	--	Molecular Function: phosphorelay response regulator activity (GO:0000156);; Biological Process: phosphorelay signal transduction system (GO:0000160);; Molecular Function: DNA binding (GO:0003677);; Molecular Function: chromatin binding (GO:0003682);; Biological Process: regulation of transcription, DNA-templated (GO:0006355);; Molecular Function: kinase activity (GO:0016301);; Biological Process:…	K14491|0|mdm:103403691|two-component response regulator ARR1-like; K14491 two-component response regulator ARR-B family (A)	[K]	Transcription	Two-component response regulator ARR1 OS=Arabidopsis thaliana GN=ARR1 PE=1 SV=2	T	Signal transduction mechanisms	PREDICTED: two-component response regulator ARR1-like isoform X2 [Malus domestica]
MD07G1222400	[O]	Posttranslational modification, protein turnover, chaperones	--	--	[O]	Posttranslational modification, protein turnover, chaperones	Protein SMAX1-LIKE 7 OS=Arabidopsis thaliana GN=SMXL7 PE=1 SV=1	O	Posttranslational modification, protein turnover, chaperones	PREDICTED: protein SMAX1-LIKE 7-like [Malus domestica]
MD09G1065800	--	--	--	--	--	--	--	S	Function unknown	PREDICTED: uncharacterized protein LOC103955695 isoform X5 [Pyrus x bretschneideri]
MD10G1218800	--	--	Biological Process: microtubule cytoskeleton organization (GO:0000226);; Cellular Component: nuclear pore (GO:0005643);; Cellular Component: nucleolus (GO:0005730);; Cellular Component: cytosol (GO:0005829);; Biological Process: protein import into nucleus (GO:0006606);; Cellular Component: plasmodesma (GO:0009506);; Cellular Component: chloroplast (GO:0009507);; Biological Process: negative regu…	K09291|0|mdm:103446019|nuclear-pore anchor-like; K09291 nucleoprotein TPR (A)	[S]	Function unknown	Nuclear-pore anchor OS=Arabidopsis thaliana GN=NUA PE=1 SV=1	U	Intracellular trafficking, secretion, and vesicular transport	PREDICTED: LOW QUALITY PROTEIN: nuclear-pore anchor-like [Malus domestica]
MD04G1023500	--	--	--	--	--	--	Transcription factor bHLH78 OS=Arabidopsis thaliana GN=BHLH78 PE=1 SV=1	K	Transcription	PREDICTED: transcription factor bHLH77 [Malus domestica]
MD11G1093000	[I]	Lipid transport and metabolism	Molecular Function: C-4 methylsterol oxidase activity (GO:0000254);; Molecular Function: iron ion binding (GO:0005506);; Biological Process: fatty acid biosynthetic process (GO:0006633);; Cellular Component: integral component of membrane (GO:0016021);; Biological Process: oxidation-reduction process (GO:0055114);;	K14424|0|mdm:103447498|methylsterol monooxygenase 2-2; K14424 4-alpha-methyl-delta7-sterol-4alpha-methyl oxidase [EC:1.14.13.72] (A)	[I]	Lipid transport and metabolism	Methylsterol monooxygenase 2-2 OS=Arabidopsis thaliana GN=SMO2-2 PE=2 SV=1	I	Lipid transport and metabolism	PREDICTED: methylsterol monooxygenase 2-2 [Malus domestica]
MD03G1274300	--	--	--	K14015|0|mdm:103432482|NPL4-like protein 2; K14015 nuclear protein localization protein 4 homolog (A)	[YU]	--	NPL4-like protein 2 OS=Arabidopsis thaliana GN=At2g47970 PE=1 SV=1	Y	Nuclear structure	PREDICTED: NPL4-like protein 2 [Malus domestica]
MD07G1169900	[Z]	Cytoskeleton	--	--	[Z]	Cytoskeleton	Kinesin-like protein KIN-UC OS=Arabidopsis thaliana GN=KINUC PE=1 SV=2	Z	Cytoskeleton	PREDICTED: armadillo repeat-containing kinesin-like protein 1 isoform X1 [Malus domestica]
MD11G1131400	--	--	--	--	--	--	--	S	Function unknown	PREDICTED: uncharacterized protein LOC103422849 [Malus domestica]
MD10G1300800	--	--	--	--	--	--	--	S	Function unknown	PREDICTED: uncharacterized protein LOC103446457 [Malus domestica]
MD11G1046500	--	--	--	--	--	--	--	S	Function unknown	PREDICTED: uncharacterized protein LOC103422751 [Malus domestica]
MD17G1145400	[R]	General function prediction only	--	--	[R]	General function prediction only	--	S	Function unknown	PREDICTED: uncharacterized protein LOC103405309 [Malus domestica]
MD16G1089100	[J]	Translation, ribosomal structure and biogenesis	Molecular Function: threonine-tRNA ligase activity (GO:0004829);; Molecular Function: ATP binding (GO:0005524);; Cellular Component: cytoplasm (GO:0005737);; Biological Process: threonyl-tRNA aminoacylation (GO:0006435);;	K01868|0|mdm:103402989|threonine--tRNA ligase, mitochondrial-like; K01868 threonyl-tRNA synthetase [EC:6.1.1.3] (A)	[J]	Translation, ribosomal structure and biogenesis	Threonine--tRNA ligase, mitochondrial 1 OS=Arabidopsis thaliana GN=THRRS PE=1 SV=3	J	Translation, ribosomal structure and biogenesis	PREDICTED: threonine--tRNA ligase, mitochondrial 1-like [Malus domestica]
MD03G1157200	[E]	Amino acid transport and metabolism	Molecular Function: hydroxymethylglutaryl-CoA lyase activity (GO:0004419);; Biological Process: metabolic process (GO:0008152);;	K01640|0|pxb:103935502|hydroxymethylglutaryl-CoA lyase, mitochondrial; K01640 hydroxymethylglutaryl-CoA lyase [EC:4.1.3.4] (A)	[CE]	--	Hydroxymethylglutaryl-CoA lyase, mitochondrial OS=Arabidopsis thaliana GN=HMGCL PE=1 SV=2	E	Amino acid transport and metabolism	PREDICTED: hydroxymethylglutaryl-CoA lyase, mitochondrial [Pyrus x bretschneideri]
MD00G1102700	--	--	--	--	[P]	Inorganic ion transport and metabolism	Heavy metal-associated isoprenylated plant protein 3 OS=Arabidopsis thaliana GN=HIPP03 PE=1 SV=1	S	Function unknown	PREDICTED: heavy metal-associated isoprenylated plant protein 3 [Malus domestica]
MD13G1040100	[T]	Signal transduction mechanisms	Biological Process: response to stress (GO:0006950);;	--	--	--	Universal stress protein A-like protein OS=Arabidopsis thaliana GN=At3g01520 PE=1 SV=2	T	Signal transduction mechanisms	PREDICTED: universal stress protein A-like protein [Malus domestica]
MD10G1327600	--	--	--	--	[R]	General function prediction only	--	S	Function unknown	PREDICTED: uncharacterized protein LOC103446756 [Malus domestica]
MD17G1091300	--	--	Molecular Function: lyase activity (GO:0016829);; Molecular Function: metal ion binding (GO:0046872);;	--	--	--	Probable terpene synthase 9 OS=Ricinus communis GN=TPS9 PE=3 SV=1	--	--	PREDICTED: probable terpene synthase 9 [Malus domestica]
MD09G1054400	[T]	Signal transduction mechanisms	--	--	[U]	Intracellular trafficking, secretion, and vesicular transport	Phosphate transporter PHO1 homolog 9 OS=Arabidopsis thaliana GN=PHO1-H9 PE=2 SV=1	T	Signal transduction mechanisms	PREDICTED: phosphate transporter PHO1 homolog 9-like [Malus domestica]
MD02G1121800	--	--	Molecular Function: zinc ion binding (GO:0008270);;	K18932|0|mdm:103455778|protein S-acyltransferase 10-like; K18932 palmitoyltransferase [EC:2.3.1.225] (A)	--	--	Protein S-acyltransferase 10 OS=Arabidopsis thaliana GN=PAT10 PE=1 SV=1	S	Function unknown	PREDICTED: protein S-acyltransferase 10-like [Malus domestica]
MD06G1073700	--	--	--	K05293|0|mdm:103437156|phosphatidylinositol glycan anchor biosynthesis class U protein-like; K05293 phosphatidylinositol glycan, class U (A)	[R]	General function prediction only	--	S	Function unknown	PREDICTED: phosphatidylinositol glycan anchor biosynthesis class U protein-like isoform X1 [Malus domestica]
MD14G1165500	--	--	--	--	[R]	General function prediction only	Zinc finger CCCH domain-containing protein 67 OS=Arabidopsis thaliana GN=At5g63260 PE=2 SV=2	S	Function unknown	PREDICTED: zinc finger CCCH domain-containing protein 67-like [Malus domestica]
MD05G1032800	--	--	Cellular Component: chloroplast thylakoid (GO:0009534);; Biological Process: response to light intensity (GO:0009642);;	--	--	--	Light-harvesting complex-like protein OHP2, chloroplastic OS=Arabidopsis thaliana GN=OHP2 PE=2 SV=1	S	Function unknown	PREDICTED: probable basic-leucine zipper transcription factor R [Malus domestica]
MD06G1037400	[V]	Defense mechanisms	Molecular Function: ATP binding (GO:0005524);; Biological Process: ATP catabolic process (GO:0006200);; Cellular Component: integral component of membrane (GO:0016021);; Molecular Function: ATPase activity, coupled to transmembrane movement of substances (GO:0042626);; Biological Process: transmembrane transport (GO:0055085);;	K05658|0|mdm:103436917|ABC transporter B family member 2-like; K05658 ATP-binding cassette, subfamily B (MDR/TAP), member 1 [EC:3.6.3.44] (A)	[Q]	Secondary metabolites biosynthesis, transport and catabolism	ABC transporter B family member 2 OS=Arabidopsis thaliana GN=ABCB2 PE=1 SV=3	V	Defense mechanisms	PREDICTED: ABC transporter B family member 2-like [Malus domestica]
MD17G1242600	--	--	Cellular Component: extracellular region (GO:0005576);; Biological Process: sexual reproduction (GO:0019953);;	--	--	--	Expansin-B3 OS=Arabidopsis thaliana GN=EXPB3 PE=2 SV=2	G	Carbohydrate transport and metabolism	PREDICTED: expansin-B3-like [Malus domestica]
MD16G1047200	--	--	--	K15168|0|pxb:103947186|mediator of RNA polymerase II transcription subunit 25-like; K15168 mediator of RNA polymerase II transcription subunit 25 (A)	--	--	Mediator of RNA polymerase II transcription subunit 25 OS=Arabidopsis thaliana GN=MED25 PE=1 SV=1	K	Transcription	PREDICTED: mediator of RNA polymerase II transcription subunit 25 isoform X2 [Pyrus x bretschneideri]
MD16G1276300	--	--	Cellular Component: cytosol (GO:0005829);; Biological Process: intracellular protein transport (GO:0006886);; Biological Process: vesicle-mediated transport (GO:0016192);; Cellular Component: clathrin vesicle coat (GO:0030125);; Cellular Component: clathrin adaptor complex (GO:0030131);; Cellular Component: clathrin coat of coated pit (GO:0030132);;	K11826|0|mdm:103403996|AP-2 complex subunit mu; K11826 AP-2 complex subunit mu-1 (A)	[U]	Intracellular trafficking, secretion, and vesicular transport	AP-2 complex subunit mu OS=Arabidopsis thaliana GN=AP2M PE=1 SV=1	U	Intracellular trafficking, secretion, and vesicular transport	PREDICTED: AP-2 complex subunit mu isoform X1 [Malus domestica]
MD01G1090900	--	--	--	K12133|0|mdm:103406243|protein LHY-like; K12133 MYB-related transcription factor LHY (A)	[O]	Posttranslational modification, protein turnover, chaperones	Protein LHY OS=Arabidopsis thaliana GN=LHY PE=1 SV=2	K	Transcription	PREDICTED: protein LHY-like [Malus domestica]
MD07G1200400	--	--	--	--	--	--	Telomere repeat-binding protein 4 OS=Arabidopsis thaliana GN=TRP4 PE=1 SV=1	K	Transcription	PREDICTED: telomere repeat-binding protein 3-like [Malus domestica]
MD16G1014900	[T]	Signal transduction mechanisms	--	K14489|0|mdm:103422017|histidine kinase 4-like; K14489 arabidopsis histidine kinase 2/3/4 (cytokinin receptor) [EC:2.7.13.3] (A)	[T]	Signal transduction mechanisms	Histidine kinase 4 OS=Arabidopsis thaliana GN=AHK4 PE=1 SV=1	T	Signal transduction mechanisms	histidine kinase 4-like [Malus domestica]
MD04G1033500	--	--	Molecular Function: transferase activity, transferring glycosyl groups (GO:0016757);;	--	[GC]	--	UDP-glycosyltransferase 92A1 OS=Arabidopsis thaliana GN=UGT92A1 PE=2 SV=1	S	Function unknown	PREDICTED: UDP-glycosyltransferase 92A1-like [Malus domestica]
MD04G1002300	--	--	Cellular Component: nucleus (GO:0005634);; Cellular Component: cytosol (GO:0005829);; Cellular Component: plasma membrane (GO:0005886);;	--	--	--	--	S	Function unknown	PREDICTED: uncharacterized protein LOC103965049 [Pyrus x bretschneideri]
MD10G1056800	[O]	Posttranslational modification, protein turnover, chaperones	Molecular Function: ATP binding (GO:0005524);; Cellular Component: mitochondrion (GO:0005739);; Biological Process: protein folding (GO:0006457);; Biological Process: response to stress (GO:0006950);; Molecular Function: unfolded protein binding (GO:0051082);;	K04043|0|mdm:103429530|heat shock 70 kDa protein, mitochondrial; K04043 molecular chaperone DnaK (A)	[O]	Posttranslational modification, protein turnover, chaperones	Heat shock 70 kDa protein, mitochondrial OS=Phaseolus vulgaris PE=2 SV=1	O	Posttranslational modification, protein turnover, chaperones	PREDICTED: heat shock 70 kDa protein, mitochondrial [Malus domestica]
MD17G1053400	--	--	Biological Process: intracellular protein transport (GO:0006886);; Cellular Component: membrane (GO:0016020);; Biological Process: vesicle-mediated transport (GO:0016192);;	K08493|1.15417e-143|mdm:103404468|vesicle transport v-SNARE 13; K08493 vesicle transport through interaction with t-SNAREs 1 (A)	[U]	Intracellular trafficking, secretion, and vesicular transport	Vesicle transport v-SNARE 13 OS=Arabidopsis thaliana GN=VTI13 PE=2 SV=1	U	Intracellular trafficking, secretion, and vesicular transport	PREDICTED: vesicle transport v-SNARE 13 [Malus domestica]
MD10G1304800	--	--	--	K15601|0|mdm:103446492|uncharacterized LOC103446492; K15601 lysine-specific demethylase 3 [EC:1.14.11.-] (A)	[K]	Transcription	Lysine-specific demethylase JMJ25 OS=Arabidopsis thaliana GN=JMJ25 PE=1 SV=1	S	Function unknown	PREDICTED: lysine-specific demethylase JMJ25-like [Malus domestica]
MD06G1185800	--	--	--	--	--	--	Ubiquitin carboxyl-terminal hydrolase 23 OS=Arabidopsis thaliana GN=UBP23 PE=2 SV=2	O	Posttranslational modification, protein turnover, chaperones	PREDICTED: uncharacterized protein LOC103958773 isoform X1 [Pyrus x bretschneideri]
MD10G1323700	[E]	Amino acid transport and metabolism	Molecular Function: aminomethyltransferase activity (GO:0004047);; Biological Process: glycine catabolic process (GO:0006546);; Biological Process: pattern specification process (GO:0007389);; Biological Process: regulation of cell size (GO:0008361);; Molecular Function: transaminase activity (GO:0008483);; Cellular Component: chloroplast thylakoid (GO:0009534);; Cellular Component: chloroplast s…	K00605|0|mdm:103446734|aminomethyltransferase, mitochondrial; K00605 aminomethyltransferase [EC:2.1.2.10] (A)	[E]	Amino acid transport and metabolism	Aminomethyltransferase, mitochondrial OS=Solanum tuberosum GN=GDCST PE=2 SV=1	E	Amino acid transport and metabolism	PREDICTED: aminomethyltransferase, mitochondrial [Malus domestica]
MD14G1081800	--	--	--	K03860|0|mdm:103454552|N-acetylglucosaminyl-phosphatidylinositol biosynthetic protein gpi1-like; K03860 phosphatidylinositol glycan, class Q (A)	[MO]	--	--	S	Function unknown	PREDICTED: phosphatidylinositol N-acetylglucosaminyltransferase subunit GPI1-like isoform X2 [Malus domestica]
MD08G1010800	--	--	--	K10401|0|pmum:103321383|kinesin-like protein KIF22-A; K10401 kinesin family member 18/19 (A)	[Z]	Cytoskeleton	Kinesin-like protein KIN-6 OS=Arabidopsis thaliana GN=KIN6 PE=3 SV=2	Z	Cytoskeleton	hypothetical protein PRUPE_1G363400 [Prunus persica]
MD15G1020900	[OC]	--	Biological Process: glycerol ether metabolic process (GO:0006662);; Molecular Function: electron carrier activity (GO:0009055);; Molecular Function: protein disulfide oxidoreductase activity (GO:0015035);; Biological Process: cell redox homeostasis (GO:0045454);;	K03671|9.65625e-60|mdm:103450437|thioredoxin H1-like; K03671 thioredoxin 1 (A)	[O]	Posttranslational modification, protein turnover, chaperones	Thioredoxin H-type OS=Ricinus communis PE=3 SV=1	O	Posttranslational modification, protein turnover, chaperones	PREDICTED: thioredoxin H1-like [Malus domestica]
MD10G1104300	[R]	General function prediction only	--	K02180|0|mdm:103445038|mitotic checkpoint protein BUB3.2; K02180 cell cycle arrest protein BUB3 (A)	[D]	Cell cycle control, cell division, chromosome partitioning	Mitotic checkpoint protein BUB3.2 OS=Arabidopsis thaliana GN=BUB3.2 PE=2 SV=1	S	Function unknown	PREDICTED: mitotic checkpoint protein BUB3.2 [Malus domestica]
MD12G1132900	[R]	General function prediction only	--	--	[R]	General function prediction only	Ankyrin repeat-containing protein At5g02620 OS=Arabidopsis thaliana GN=At5g02620 PE=1 SV=1	S	Function unknown	PREDICTED: ankyrin repeat-containing protein At5g02620-like [Malus domestica]
MD10G1208700	[RTKL]	--	Molecular Function: protein kinase activity (GO:0004672);;	--	[T]	Signal transduction mechanisms	Serine/threonine-protein kinase CTR1 OS=Arabidopsis thaliana GN=CTR1 PE=1 SV=1	T	Signal transduction mechanisms	PREDICTED: uncharacterized protein LOC103445865 isoform X1 [Malus domestica]
MD07G1165300	[RTKL]	--	Molecular Function: protein kinase C activity (GO:0004697);; Molecular Function: ATP binding (GO:0005524);; Biological Process: protein phosphorylation (GO:0006468);;	K06276|0|mdm:103439475|3-phosphoinositide-dependent protein kinase 1-like; K06276 3-phosphoinositide dependent protein kinase-1 [EC:2.7.11.1] (A)	[T]	Signal transduction mechanisms	3-phosphoinositide-dependent protein kinase 1 OS=Arabidopsis thaliana GN=PDPK1 PE=1 SV=1	T	Signal transduction mechanisms	PREDICTED: 3-phosphoinositide-dependent protein kinase 1 [Malus domestica]
MD12G1049400	[J]	Translation, ribosomal structure and biogenesis	Molecular Function: structural constituent of ribosome (GO:0003735);; Cellular Component: ribosome (GO:0005840);; Biological Process: translation (GO:0006412);;	K02979|1.45601e-19|sly:101258605|40S ribosomal protein S28; K02979 small subunit ribosomal protein S28e (A)	[J]	Translation, ribosomal structure and biogenesis	40S ribosomal protein S28 OS=Zea mays GN=RPS28 PE=3 SV=1	J	Translation, ribosomal structure and biogenesis	PREDICTED: 40S ribosomal protein S28 [Fragaria vesca subsp. vesca]
MD05G1315100	[R]	General function prediction only	--	K12837|0|mdm:103434776|splicing factor U2af large subunit B-like; K12837 splicing factor U2AF 65 kDa subunit (A)	[A]	RNA processing and modification	Splicing factor U2af large subunit B OS=Nicotiana plumbaginifolia GN=U2AF65B PE=2 SV=1	S	Function unknown	PREDICTED: splicing factor U2af large subunit B-like isoform X3 [Pyrus x bretschneideri]
MD16G1037700	--	--	--	--	--	--	--	S	Function unknown	PREDICTED: uncharacterized protein LOC103402657 [Malus domestica]
MD07G1060900	[G]	Carbohydrate transport and metabolism	--	K05349|0|mdm:103438774|lysosomal beta glucosidase; K05349 beta-glucosidase [EC:3.2.1.21] (A)	--	--	Beta-xylosidase/alpha-L-arabinofuranosidase 2 OS=Medicago sativa subsp. varia GN=Xyl2 PE=2 SV=1	G	Carbohydrate transport and metabolism	PREDICTED: beta-glucosidase BoGH3B [Malus domestica]
MD11G1151500	--	--	--	--	[S]	Function unknown	--	S	Function unknown	PREDICTED: syndetin-like isoform X1 [Pyrus x bretschneideri]
MD04G1037800	--	--	Cellular Component: Golgi membrane (GO:0000139);; Molecular Function: sugar:proton symporter activity (GO:0005351);; Biological Process: carbohydrate transport (GO:0008643);; Cellular Component: integral component of membrane (GO:0016021);;	--	[G]	Carbohydrate transport and metabolism	CMP-sialic acid transporter 3 OS=Arabidopsis thaliana GN=UTR6 PE=2 SV=1	EG	--	PREDICTED: CMP-sialic acid transporter 3 [Malus domestica]
MD05G1185500	[R]	General function prediction only	--	--	[S]	Function unknown	COMPASS-like H3K4 histone methylase component WDR5A OS=Arabidopsis thaliana GN=WDR5A PE=1 SV=1	S	Function unknown	PREDICTED: WD repeat-containing protein 26 [Malus domestica]
MD03G1052500	--	--	--	--	[T]	Signal transduction mechanisms	Putative disease resistance protein RGA3 OS=Solanum bulbocastanum GN=RGA3 PE=2 SV=2	S	Function unknown	PREDICTED: putative disease resistance protein RGA1 [Pyrus x bretschneideri]
MD05G1071900	[IM]	--	Biological Process: isopentenyl diphosphate biosynthetic process, methylerythritol 4-phosphate pathway (GO:0019288);; Biological Process: oxidation-reduction process (GO:0055114);;	K03527|0|mdm:103425754|4-hydroxy-3-methylbut-2-enyl diphosphate reductase, chloroplastic; K03527 4-hydroxy-3-methylbut-2-enyl diphosphate reductase [EC:1.17.1.2] (A)	--	--	4-hydroxy-3-methylbut-2-enyl diphosphate reductase, chloroplastic OS=Arabidopsis thaliana GN=ISPH PE=2 SV=1	I	Lipid transport and metabolism	PREDICTED: 4-hydroxy-3-methylbut-2-enyl diphosphate reductase, chloroplastic [Malus domestica]
MD15G1443200	--	--	--	K12839|0|mdm:103425380|survival of motor neuron-related-splicing factor 30-like; K12839 survival of motor neuron-related-splicing factor 30 (A)	[A]	RNA processing and modification	--	A	RNA processing and modification	PREDICTED: survival of motor neuron-related-splicing factor 30-like [Malus domestica]
MD07G1162700	--	--	--	--	--	--	Protein NTM1-like 9 OS=Arabidopsis thaliana GN=NTL9 PE=1 SV=1	--	--	PREDICTED: NAC domain-containing protein 68-like [Malus domestica]
MD09G1082900	--	--	--	--	--	--	Protein CROWDED NUCLEI 1 OS=Arabidopsis thaliana GN=CRWN1 PE=1 SV=1	S	Function unknown	PREDICTED: protein CROWDED NUCLEI 1 [Malus domestica]
MD06G1055600	--	--	--	K10624|0|mdm:103428211|uncharacterized LOC103428211; K10624 E3 ubiquitin-protein ligase RBBP6 [EC:6.3.2.19] (A)	[O]	Posttranslational modification, protein turnover, chaperones	E3 ubiquitin ligase PQT3-like OS=Arabidopsis thaliana GN=At5g47430 PE=1 SV=1	S	Function unknown	PREDICTED: uncharacterized protein LOC103428211 [Malus domestica]
MD11G1184600	--	--	--	--	--	--	Pentatricopeptide repeat-containing protein At1g62350 OS=Arabidopsis thaliana GN=At1g62350 PE=2 SV=1	S	Function unknown	PREDICTED: pentatricopeptide repeat-containing protein At1g62350 [Pyrus x bretschneideri]
MD14G1219800	[K]	Transcription	--	--	[K]	Transcription	Protein Dr1 homolog OS=Arabidopsis thaliana GN=DR1 PE=2 SV=1	K	Transcription	PREDICTED: protein Dr1 homolog [Malus domestica]
MD10G1189000	--	--	--	--	--	--	--	S	Function unknown	PREDICTED: YTH domain-containing family protein 2-like [Nelumbo nucifera]
MD03G1005700	[K]	Transcription	Biological Process: RNA splicing, via endonucleolytic cleavage and ligation (GO:0000394);; Cellular Component: transcription factor TFIID complex (GO:0005669);; Biological Process: transcription initiation from RNA polymerase II promoter (GO:0006367);;	K03132|1.28796e-101|mdm:103418657|transcription initiation factor TFIID subunit 7-like; K03132 transcription initiation factor TFIID subunit 7 (A)	[K]	Transcription	Transcription initiation factor TFIID subunit 7 OS=Arabidopsis thaliana GN=TAF7 PE=1 SV=1	K	Transcription	PREDICTED: transcription initiation factor TFIID subunit 7-like [Malus domestica]
MD14G1239300	[F]	Nucleotide transport and metabolism	Molecular Function: dihydroorotate oxidase activity (GO:0004158);; Biological Process: 'de novo' pyrimidine nucleobase biosynthetic process (GO:0006207);; Biological Process: uracil catabolic process (GO:0006212);; Biological Process: UMP biosynthetic process (GO:0006222);; Cellular Component: chloroplast stroma (GO:0009570);; Molecular Function: dihydropyrimidine dehydrogenase (NADP+) activity (…	K00207|0|pxb:103950551|dihydropyrimidine dehydrogenase [NADP(+)]-like; K00207 dihydropyrimidine dehydrogenase (NADP+) [EC:1.3.1.2] (A)	[F]	Nucleotide transport and metabolism	Dihydropyrimidine dehydrogenase (NADP(+)), chloroplastic OS=Arabidopsis thaliana GN=PYD1 PE=1 SV=1	F	Nucleotide transport and metabolism	PREDICTED: dihydropyrimidine dehydrogenase (NADP(+)), chloroplastic-like [Pyrus x bretschneideri]
Apple_newGene_35266	--	--	--	--	--	--	Disease resistance protein RPS4 {ECO:0000303|PubMed:10571887} OS=Arabidopsis thaliana (Mouse-ear cress) PE=1 SV=1	T	Signal transduction mechanisms	PREDICTED: putative disease resistance protein At4g11170 [Malus domestica]
MD01G1203100	[O]	Posttranslational modification, protein turnover, chaperones	--	K01280|0|pxb:103932208|tripeptidyl-peptidase 2-like; K01280 tripeptidyl-peptidase II [EC:3.4.14.10] (A)	[O]	Posttranslational modification, protein turnover, chaperones	Tripeptidyl-peptidase 2 OS=Arabidopsis thaliana GN=TPP2 PE=1 SV=1	O	Posttranslational modification, protein turnover, chaperones	PREDICTED: tripeptidyl-peptidase 2-like isoform X1 [Pyrus x bretschneideri]
MD04G1196800	--	--	Biological Process: formation of translation preinitiation complex (GO:0001731);; Molecular Function: translation initiation factor activity (GO:0003743);; Cellular Component: cytosol (GO:0005829);; Cellular Component: eukaryotic translation initiation factor 3 complex (GO:0005852);; Cellular Component: plasma membrane (GO:0005886);; Biological Process: regulation of translational initiation (GO:…	K03254|0|mdm:103433891|eukaryotic translation initiation factor 3 subunit A-like; K03254 translation initiation factor 3 subunit A (A)	[J]	Translation, ribosomal structure and biogenesis	Eukaryotic translation initiation factor 3 subunit A OS=Arabidopsis thaliana GN=TIF3A1 PE=1 SV=1	J	Translation, ribosomal structure and biogenesis	PREDICTED: eukaryotic translation initiation factor 3 subunit A-like [Malus domestica]
MD03G1187000	[J]	Translation, ribosomal structure and biogenesis	Molecular Function: RNA binding (GO:0003723);; Molecular Function: structural constituent of ribosome (GO:0003735);; Cellular Component: ribosome (GO:0005840);; Biological Process: translation (GO:0006412);;	K02946|2.98832e-119|mdm:103418971|30S ribosomal protein S10, chloroplastic-like; K02946 small subunit ribosomal protein S10 (A)	[J]	Translation, ribosomal structure and biogenesis	30S ribosomal protein S10, chloroplastic OS=Mesembryanthemum crystallinum GN=RPS10 PE=2 SV=1	J	Translation, ribosomal structure and biogenesis	PREDICTED: 30S ribosomal protein S10, chloroplastic-like [Malus domestica]
MD14G1203800	--	--	--	--	[O]	Posttranslational modification, protein turnover, chaperones	NEP1-interacting protein-like 2 OS=Arabidopsis thaliana GN=ATL24 PE=1 SV=2	O	Posttranslational modification, protein turnover, chaperones	PREDICTED: NEP1-interacting protein-like 2 isoform X2 [Malus domestica]
MD14G1209100	--	--	--	--	--	--	AT-rich interactive domain-containing protein 2 OS=Arabidopsis thaliana GN=ARID2 PE=2 SV=1	S	Function unknown	PREDICTED: uncharacterized protein LOC103455401 [Malus domestica]
MD04G1013100	--	--	--	--	--	--	--	S	Function unknown	PREDICTED: uncharacterized protein LOC103411601 [Malus domestica]
MD01G1147700	--	--	--	--	--	--	--	S	Function unknown	PREDICTED: formin-like protein 20 [Malus domestica]
MD05G1040100	[R]	General function prediction only	--	K07019|0|pxb:103940445|embryogenesis-associated protein EMB8-like; K07019 (A)	[R]	General function prediction only	Embryogenesis-associated protein EMB8 OS=Picea glauca GN=EMB8 PE=2 SV=1	S	Function unknown	PREDICTED: embryogenesis-associated protein EMB8-like isoform X2 [Pyrus x bretschneideri]
MD16G1249500	--	--	--	--	--	--	--	S	Function unknown	PREDICTED: uncharacterized protein LOC103418081 [Malus domestica]
MD01G1038800	--	--	--	K10703|1.47165e-142|pxb:103954176|very-long-chain (3R)-3-hydroxyacyl-CoA dehydratase PASTICCINO 2A; K10703 very-long-chain (3R)-3-hydroxyacyl-CoA dehydratase [EC:4.2.1.134] (A)	[R]	General function prediction only	Very-long-chain (3R)-3-hydroxyacyl-CoA dehydratase PASTICCINO 2A OS=Oryza sativa subsp. japonica GN=PAS2A PE=2 SV=2	S	Function unknown	PREDICTED: very-long-chain (3R)-3-hydroxyacyl-CoA dehydratase PASTICCINO 2A [Pyrus x bretschneideri]
MD15G1442300	--	--	Molecular Function: nucleic acid binding (GO:0003676);;	--	[A]	RNA processing and modification	Zinc finger CCCH domain-containing protein 5 OS=Arabidopsis thaliana GN=At1g10320 PE=2 SV=2	S	Function unknown	PREDICTED: zinc finger CCCH domain-containing protein 5 isoform X1 [Malus domestica]
MD03G1090000	--	--	--	--	[I]	Lipid transport and metabolism	Oxysterol-binding protein-related protein 3C OS=Arabidopsis thaliana GN=ORP3C PE=2 SV=1	S	Function unknown	PREDICTED: oxysterol-binding protein-related protein 3C isoform X1 [Malus domestica]
MD01G1220800	[T]	Signal transduction mechanisms	Molecular Function: protein serine/threonine phosphatase activity (GO:0004722);; Biological Process: protein dephosphorylation (GO:0006470);; Molecular Function: metal ion binding (GO:0046872);;	K14497|0|mdm:103443860|probable protein phosphatase 2C 51; K14497 protein phosphatase 2C [EC:3.1.3.16] (A)	[T]	Signal transduction mechanisms	Probable protein phosphatase 2C 8 OS=Oryza sativa subsp. japonica GN=Os01g0656200 PE=2 SV=1	T	Signal transduction mechanisms	PREDICTED: probable protein phosphatase 2C 51 isoform X1 [Malus domestica]
MD12G1256600	--	--	Molecular Function: DNA binding (GO:0003677);;	--	[R]	General function prediction only	Protein CHROMATIN REMODELING 4 OS=Arabidopsis thaliana GN=CHR4 PE=2 SV=1	S	Function unknown	PREDICTED: uncharacterized protein LOC103414019 [Malus domestica]
MD08G1217300	--	--	Molecular Function: oxidoreductase activity, acting on the CH-OH group of donors, NAD or NADP as acceptor (GO:0016616);; Molecular Function: NAD binding (GO:0051287);; Biological Process: oxidation-reduction process (GO:0055114);;	--	[C]	Energy production and conversion	D-3-phosphoglycerate dehydrogenase 2, chloroplastic OS=Arabidopsis thaliana GN=PGDH2 PE=1 SV=2	E	Amino acid transport and metabolism	PREDICTED: hydroxypyruvate reductase [Malus domestica]
MD09G1196700	--	--	--	--	[D]	Cell cycle control, cell division, chromosome partitioning	Anoctamin-like protein At1g73020 OS=Arabidopsis thaliana GN=At1g73020 PE=1 SV=1	S	Function unknown	PREDICTED: anoctamin-like protein At1g73020 isoform X1 [Malus domestica]
MD10G1056900	--	--	--	K02331|0|pxb:103957828|DNA polymerase V; K02331 DNA polymerase phi [EC:2.7.7.7] (A)	[K]	Transcription	--	S	Function unknown	PREDICTED: DNA polymerase V [Pyrus x bretschneideri]
MD02G1213500	--	--	--	K13199|6.96653e-150|mdm:103407234|plasminogen activator inhibitor 1 RNA-binding protein-like; K13199 plasminogen activator inhibitor 1 RNA-binding protein (A)	[R]	General function prediction only	RGG repeats nuclear RNA binding protein A OS=Arabidopsis thaliana GN=RGGA PE=1 SV=1	S	Function unknown	PREDICTED: plasminogen activator inhibitor 1 RNA-binding protein-like [Malus domestica]
MD02G1188800	--	--	--	--	--	--	--	S	Function unknown	PREDICTED: uncharacterized protein LOC103415376 [Malus domestica]
MD09G1178000	--	--	--	--	--	--	--	S	Function unknown	PREDICTED: uncharacterized protein LOC103443662 [Malus domestica]
MD16G1011700	--	--	Cellular Component: integral component of membrane (GO:0016021);;	--	[U]	Intracellular trafficking, secretion, and vesicular transport	Transmembrane 9 superfamily member 3 OS=Arabidopsis thaliana GN=TMN3 PE=2 SV=1	S	Function unknown	PREDICTED: transmembrane 9 superfamily member 3 [Malus domestica]
MD17G1113200	[O]	Posttranslational modification, protein turnover, chaperones	Molecular Function: ATP binding (GO:0005524);; Biological Process: protein folding (GO:0006457);; Biological Process: response to stress (GO:0006950);; Molecular Function: unfolded protein binding (GO:0051082);;	K09487|0|mdm:103405004|heat shock protein 90-1-like; K09487 heat shock protein 90kDa beta (A)	[O]	Posttranslational modification, protein turnover, chaperones	Heat shock protein 90-6, mitochondrial OS=Arabidopsis thaliana GN=HSP90-6 PE=2 SV=1	O	Posttranslational modification, protein turnover, chaperones	PREDICTED: heat shock protein 90-6, mitochondrial-like [Malus domestica]
Apple_newGene_9051	--	--	Molecular Function: DNA binding (GO:0003677);; Molecular Function: RNA binding (GO:0003723);; Molecular Function: RNA-directed DNA polymerase activity (GO:0003964);; Biological Process: RNA-dependent DNA replication (GO:0006278);; Biological Process: cellulose microfibril organization (GO:0010215);; Biological Process: cell growth (GO:0016049);; Cellular Component: anchored component of membrane …	--	--	--	--	R	General function prediction only	T4.14 [Malus x robusta]
MD15G1150400	[J]	Translation, ribosomal structure and biogenesis	Molecular Function: translation initiation factor activity (GO:0003743);; Biological Process: translational initiation (GO:0006413);;	K02520|7.3133e-124|pxb:103956002|translation initiation factor IF-3, chloroplastic; K02520 translation initiation factor IF-3 (A)	--	--	Translation initiation factor IF3-2, chloroplastic OS=Arabidopsis thaliana GN=IF3-2 PE=2 SV=1	J	Translation, ribosomal structure and biogenesis	PREDICTED: translation initiation factor IF-3-like [Malus domestica]
MD06G1217700	[R]	General function prediction only	--	K11866|0|mdm:103438009|AMSH-like ubiquitin thioesterase 1; K11866 STAM-binding protein [EC:3.4.19.12] (A)	[T]	Signal transduction mechanisms	AMSH-like ubiquitin thioesterase 1 OS=Arabidopsis thaliana GN=AMSH1 PE=2 SV=1	S	Function unknown	PREDICTED: AMSH-like ubiquitin thioesterase 1 isoform X1 [Malus domestica]
MD06G1043400	--	--	--	--	--	--	--	S	Function unknown	PREDICTED: uncharacterized protein LOC103436947 [Malus domestica]
MD13G1054900	--	--	--	--	[S]	Function unknown	--	O	Posttranslational modification, protein turnover, chaperones	PREDICTED: uncharacterized protein LOC103451722 [Malus domestica]
MD09G1109300	--	--	--	--	[G]	Carbohydrate transport and metabolism	Probable beta-1,3-galactosyltransferase 2 OS=Arabidopsis thaliana GN=B3GALT2 PE=2 SV=1	S	Function unknown	PREDICTED: probable beta-1,3-galactosyltransferase 2 isoform X2 [Malus domestica]
MD10G1224100	--	--	--	--	--	--	Plasma membrane-associated cation-binding protein 1 OS=Arabidopsis thaliana GN=PCAP1 PE=1 SV=1	S	Function unknown	PREDICTED: plasma membrane-associated cation-binding protein 1 [Malus domestica]
MD16G1103000	[E]	Amino acid transport and metabolism	--	K14272|0|mdm:103403075|glutamate--glyoxylate aminotransferase 2; K14272 glutamate--glyoxylate aminotransferase [EC:2.6.1.4 2.6.1.2 2.6.1.44 2.6.1.-] (A)	[E]	Amino acid transport and metabolism	Glutamate--glyoxylate aminotransferase 2 OS=Arabidopsis thaliana GN=GGAT2 PE=1 SV=1	E	Amino acid transport and metabolism	PREDICTED: glutamate--glyoxylate aminotransferase 2 [Malus domestica]
MD03G1055800	[I]	Lipid transport and metabolism	--	K00645|0|mdm:103447290|malonyl-CoA-acyl carrier protein transacylase, mitochondrial; K00645 [acyl-carrier-protein] S-malonyltransferase [EC:2.3.1.39] (A)	[I]	Lipid transport and metabolism	--	I	Lipid transport and metabolism	PREDICTED: malonyl CoA-acyl carrier protein transacylase [Malus domestica]
MD00G1191800	[O]	Posttranslational modification, protein turnover, chaperones	Molecular Function: thioredoxin-disulfide reductase activity (GO:0004791);; Molecular Function: enzyme activator activity (GO:0008047);; Cellular Component: chloroplast stroma (GO:0009570);; Biological Process: thylakoid membrane organization (GO:0010027);; Biological Process: regulation of chlorophyll biosynthetic process (GO:0010380);; Biological Process: regulation of starch biosynthetic proce…	K00384|0|mdm:103449765|NADPH-dependent thioredoxin reductase 3; K00384 thioredoxin reductase (NADPH) [EC:1.8.1.9] (A)	[O]	Posttranslational modification, protein turnover, chaperones	NADPH-dependent thioredoxin reductase 3 OS=Arabidopsis thaliana GN=NTRC PE=1 SV=2	O	Posttranslational modification, protein turnover, chaperones	PREDICTED: NADPH-dependent thioredoxin reductase 3 [Malus domestica]
MD11G1239700	--	--	Cellular Component: chloroplast (GO:0009507);;	K13348|4.68906e-128|mdm:103448811|uncharacterized LOC103448811; K13348 protein Mpv17 (A)	[R]	General function prediction only	--	S	Function unknown	PREDICTED: protein SYM1-like isoform X1 [Malus domestica]
MD06G1058300	[K]	Transcription	Biological Process: RNA splicing (GO:0008380);; Cellular Component: small nuclear ribonucleoprotein complex (GO:0030532);;	K11096|1.11206e-45|pmum:103340048|small nuclear ribonucleoprotein Sm D2-like; K11096 small nuclear ribonucleoprotein D2 (A)	[A]	RNA processing and modification	Sm-like protein LSM3B OS=Arabidopsis thaliana GN=LSM3B PE=1 SV=1	K	Transcription	PREDICTED: small nuclear ribonucleoprotein Sm D2 [Beta vulgaris subsp. vulgaris]
MD08G1200900	--	--	--	--	[K]	Transcription	GATA transcription factor 24 OS=Arabidopsis thaliana GN=GATA24 PE=2 SV=2	K	Transcription	PREDICTED: GATA transcription factor 24-like [Malus domestica]
MD08G1060500	--	--	--	--	--	--	CST complex subunit CTC1 OS=Arabidopsis thaliana GN=CTC1 PE=1 SV=2	S	Function unknown	PREDICTED: CST complex subunit CTC1 [Malus domestica]
MD07G1012900	[J]	Translation, ribosomal structure and biogenesis	--	K05539|0|pxb:103945890|tRNA-dihydrouridine(20a/20b) synthase [NAD(P)+]; K05539 tRNA-dihydrouridine synthase A [EC:1.-.-.-] (A)	[J]	Translation, ribosomal structure and biogenesis	--	J	Translation, ribosomal structure and biogenesis	PREDICTED: uncharacterized protein LOC103945890 isoform X1 [Pyrus x bretschneideri]
MD03G1282000	--	--	--	--	--	--	--	S	Function unknown	PREDICTED: uncharacterized protein LOC103432706 [Malus domestica]
MD07G1226500	[P]	Inorganic ion transport and metabolism	Biological Process: iron ion transport (GO:0006826);; Biological Process: cellular iron ion homeostasis (GO:0006879);; Biological Process: response to oxidative stress (GO:0006979);; Molecular Function: ferric iron binding (GO:0008199);; Biological Process: response to abscisic acid (GO:0009737);; Molecular Function: oxidoreductase activity (GO:0016491);; Biological Process: oxidation-reduction p…	K00522|1.32256e-154|mdm:103427486|ferritin-3, chloroplastic-like; K00522 ferritin heavy chain [EC:1.16.3.2] (A)	[P]	Inorganic ion transport and metabolism	Ferritin-3, chloroplastic OS=Glycine max PE=2 SV=1	P	Inorganic ion transport and metabolism	PREDICTED: LOW QUALITY PROTEIN: ferritin-3, chloroplastic-like [Malus domestica]
MD13G1006200	--	--	--	--	[R]	General function prediction only	Protection of telomeres protein 1a OS=Arabidopsis thaliana GN=POT1A PE=1 SV=1	S	Function unknown	PREDICTED: protection of telomeres protein 1b-like isoform X1 [Malus domestica]
MD10G1045800	--	--	--	--	--	--	--	S	Function unknown	PREDICTED: uncharacterized protein LOC103444835 [Malus domestica]
MD07G1141400	[P]	Inorganic ion transport and metabolism	--	--	[P]	Inorganic ion transport and metabolism	K(+) efflux antiporter 2, chloroplastic OS=Arabidopsis thaliana GN=KEA2 PE=1 SV=2	P	Inorganic ion transport and metabolism	PREDICTED: K(+) efflux antiporter 2, chloroplastic [Pyrus x bretschneideri]
MD16G1191200	--	--	--	--	--	--	Protein TIME FOR COFFEE OS=Arabidopsis thaliana GN=TIC PE=1 SV=2	S	Function unknown	PREDICTED: LOW QUALITY PROTEIN: protein TIME FOR COFFEE-like [Malus domestica]
MD09G1290500	[M]	Cell wall/membrane/envelope biogenesis	Molecular Function: polygalacturonase activity (GO:0004650);; Cellular Component: extracellular region (GO:0005576);; Cellular Component: vacuole (GO:0005773);; Biological Process: carbohydrate metabolic process (GO:0005975);;	--	--	--	Probable polygalacturonase OS=Vitis vinifera GN=GSVIVT00026920001 PE=1 SV=1	M	Cell wall/membrane/envelope biogenesis	PREDICTED: probable polygalacturonase [Malus domestica]
MD09G1236500	--	--	Molecular Function: cysteamine dioxygenase activity (GO:0047800);; Biological Process: oxidation-reduction process (GO:0055114);;	K10712|8.63056e-178|mdm:103444075|2-aminoethanethiol dioxygenase; K10712 cysteamine dioxygenase [EC:1.13.11.19] (A)	[S]	Function unknown	Plant cysteine oxidase 4 OS=Arabidopsis thaliana GN=PCO4 PE=1 SV=2	S	Function unknown	PREDICTED: plant cysteine oxidase 4 [Malus domestica]
MD13G1095100	--	--	Molecular Function: zinc ion binding (GO:0008270);;	--	[O]	Posttranslational modification, protein turnover, chaperones	Probable BOI-related E3 ubiquitin-protein ligase 3 OS=Arabidopsis thaliana GN=BRG3 PE=1 SV=1	S	Function unknown	PREDICTED: probable BOI-related E3 ubiquitin-protein ligase 3 [Malus domestica]
MD10G1332000	[B]	Chromatin structure and dynamics	--	K15223|0|mdm:103422526|uncharacterized LOC103422526; K15223 upstream activation factor subunit UAF30 (A)	[K]	Transcription	--	B	Chromatin structure and dynamics	PREDICTED: alpha/beta-gliadin A-V-like [Pyrus x bretschneideri]
MD07G1110200	[F]	Nucleotide transport and metabolism	Molecular Function: nucleoside diphosphate kinase activity (GO:0004550);; Molecular Function: ATP binding (GO:0005524);; Cellular Component: vacuolar membrane (GO:0005774);; Cellular Component: peroxisome (GO:0005777);; Cellular Component: cytosol (GO:0005829);; Cellular Component: plasma membrane (GO:0005886);; Biological Process: nucleoside diphosphate phosphorylation (GO:0006165);; Biological …	K00940|1.21208e-104|pxb:103962247|nucleoside diphosphate kinase 1; K00940 nucleoside-diphosphate kinase [EC:2.7.4.6] (A)	[F]	Nucleotide transport and metabolism	Nucleoside diphosphate kinase 1 OS=Pisum sativum GN=NDPK1 PE=2 SV=1	F	Nucleotide transport and metabolism	PREDICTED: nucleoside diphosphate kinase 1 [Malus domestica]
MD12G1156300	--	--	--	--	--	--	--	S	Function unknown	PREDICTED: uncharacterized protein LOC103450507 [Malus domestica]
MD03G1208100	--	--	--	--	[M]	Cell wall/membrane/envelope biogenesis	Chloroplastic lipocalin OS=Arabidopsis thaliana GN=CHL PE=1 SV=1	M	Cell wall/membrane/envelope biogenesis	PREDICTED: LOW QUALITY PROTEIN: chloroplastic lipocalin-like [Malus domestica]
MD11G1191800	[J]	Translation, ribosomal structure and biogenesis	Molecular Function: RNA binding (GO:0003723);; Molecular Function: structural constituent of ribosome (GO:0003735);; Biological Process: translation (GO:0006412);; Cellular Component: small ribosomal subunit (GO:0015935);;	K02981|8.66999e-166|pxb:103955906|40S ribosomal protein S2-4-like; K02981 small subunit ribosomal protein S2e (A)	[J]	Translation, ribosomal structure and biogenesis	40S ribosomal protein S2-4 OS=Arabidopsis thaliana GN=RPS2D PE=2 SV=1	J	Translation, ribosomal structure and biogenesis	PREDICTED: 40S ribosomal protein S2-4-like [Pyrus x bretschneideri]
MD13G1072400	[J]	Translation, ribosomal structure and biogenesis	Molecular Function: structural constituent of ribosome (GO:0003735);; Cellular Component: ribosome (GO:0005840);; Biological Process: translation (GO:0006412);;	K02915|3.0455e-63|pxb:103950827|60S ribosomal protein L34; K02915 large subunit ribosomal protein L34e (A)	[J]	Translation, ribosomal structure and biogenesis	60S ribosomal protein L34 OS=Pisum sativum GN=RPL34 PE=2 SV=1	J	Translation, ribosomal structure and biogenesis	PREDICTED: 60S ribosomal protein L34-like [Malus domestica]
MD04G1086100	--	--	--	--	[I]	Lipid transport and metabolism	Oxysterol-binding protein-related protein 2A OS=Arabidopsis thaliana GN=ORP2A PE=2 SV=1	S	Function unknown	PREDICTED: oxysterol-binding protein-related protein 2A-like isoform X2 [Malus domestica]
MD14G1073100	--	--	--	--	[S]	Function unknown	--	S	Function unknown	PREDICTED: transposon Tf2-1 polyprotein [Malus domestica]
MD10G1259300	[OU]	--	Molecular Function: protein disulfide isomerase activity (GO:0003756);; Cellular Component: endoplasmic reticulum membrane (GO:0005789);; Biological Process: protein folding (GO:0006457);; Molecular Function: oxidoreductase activity, acting on a sulfur group of donors, disulfide as acceptor (GO:0016671);; Molecular Function: flavin adenine dinucleotide binding (GO:0050660);; Biological Process: o…	K10950|0|mdm:103419721|endoplasmic reticulum oxidoreductin-1-like; K10950 ERO1-like protein alpha [EC:1.8.4.-] (A)	[OU]	--	Endoplasmic reticulum oxidoreductin-1 OS=Arabidopsis thaliana GN=AERO1 PE=1 SV=1	OU	--	PREDICTED: endoplasmic reticulum oxidoreductin-1-like [Malus domestica]
MD16G1250100	--	--	Molecular Function: sequence-specific DNA binding transcription factor activity (GO:0003700);; Cellular Component: nucleus (GO:0005634);; Biological Process: regulation of transcription, DNA-templated (GO:0006355);; Molecular Function: sequence-specific DNA binding (GO:0043565);;	K09338|5.72933e-21|pper:PRUPE_ppa001405mg|hypothetical protein; K09338 homeobox-leucine zipper protein (A)	--	--	Homeobox-leucine zipper protein ATHB-15 OS=Arabidopsis thaliana GN=ATHB-15 PE=1 SV=1	K	Transcription	homeobox-leucine zipper protein ATHB-15 [Prunus avium]
MD05G1299200	--	--	--	--	--	--	Protein MALE DISCOVERER 1 OS=Arabidopsis thaliana GN=MDIS1 PE=1 SV=1	T	Signal transduction mechanisms	PREDICTED: protein MALE DISCOVERER 1-like isoform X3 [Pyrus x bretschneideri]
MD06G1203100	--	--	--	--	--	--	--	S	Function unknown	PREDICTED: uncharacterized protein LOC103937834 isoform X1 [Pyrus x bretschneideri]
MD12G1043000	--	--	--	--	--	--	--	S	Function unknown	PREDICTED: uncharacterized protein LOC103449577 [Malus domestica]
MD06G1216300	--	--	--	--	--	--	--	S	Function unknown	PREDICTED: uncharacterized protein LOC103428317 [Malus domestica]
MD04G1126500	--	--	Molecular Function: DNA binding (GO:0003677);; Biological Process: regulation of transcription, DNA-templated (GO:0006355);;	--	--	--	Dof zinc finger protein DOF2.4 OS=Arabidopsis thaliana GN=DOF2.4 PE=2 SV=1	S	Function unknown	PREDICTED: dof zinc finger protein DOF2.4-like [Pyrus x bretschneideri]
MD17G1163800	--	--	--	--	--	--	--	S	Function unknown	PREDICTED: uncharacterized protein LOC103405381 [Malus domestica]
MD08G1247700	--	--	Molecular Function: DNA binding (GO:0003677);; Molecular Function: sequence-specific DNA binding transcription factor activity (GO:0003700);; Cellular Component: nucleus (GO:0005634);; Biological Process: DNA methylation (GO:0006306);; Biological Process: methylation-dependent chromatin silencing (GO:0006346);; Biological Process: cell-cell signaling (GO:0007267);; Biological Process: virus induc…	K14486|0|mdm:103441991|auxin response factor 1; K14486 auxin response factor (A)	--	--	Auxin response factor 1 OS=Arabidopsis thaliana GN=ARF1 PE=1 SV=2	K	Transcription	PREDICTED: auxin response factor 1 [Malus domestica]
MD11G1103200	--	--	--	--	--	--	--	--	--	PREDICTED: uncharacterized protein LOC103944648 isoform X1 [Pyrus x bretschneideri]
MD07G1160600	[P]	Inorganic ion transport and metabolism	Cellular Component: vacuolar membrane (GO:0005774);; Cellular Component: plasma membrane (GO:0005886);; Biological Process: response to metal ion (GO:0010038);; Cellular Component: integral component of membrane (GO:0016021);; Biological Process: metal ion transport (GO:0030001);; Molecular Function: metal ion transmembrane transporter activity (GO:0046873);; Biological Process: transmembrane tra…	K14689|0|mdm:103439450|metal tolerance protein 1; K14689 solute carrier family 30 (zinc transporter), member 2 (A)	[P]	Inorganic ion transport and metabolism	Metal tolerance protein 1 OS=Arabidopsis thaliana GN=MTP1 PE=1 SV=2	P	Inorganic ion transport and metabolism	PREDICTED: LOW QUALITY PROTEIN: metal tolerance protein 1 [Malus domestica]
MD10G1090700	[R]	General function prediction only	--	--	[R]	General function prediction only	Polyadenylate-binding protein RBP47B OS=Arabidopsis thaliana GN=RBP47B PE=2 SV=1	S	Function unknown	PREDICTED: polyadenylate-binding protein RBP47 [Malus domestica]
MD10G1135300	--	--	--	--	--	--	TMV resistance protein N OS=Nicotiana glutinosa GN=N PE=1 SV=1	S	Function unknown	PREDICTED: TMV resistance protein N-like [Pyrus x bretschneideri]
MD03G1276700	--	--	--	K14485|0|mdm:103432494|protein TRANSPORT INHIBITOR RESPONSE 1-like; K14485 transport inhibitor response 1 (A)	[R]	General function prediction only	Protein TRANSPORT INHIBITOR RESPONSE 1 OS=Arabidopsis thaliana GN=TIR1 PE=1 SV=2	S	Function unknown	PREDICTED: protein TRANSPORT INHIBITOR RESPONSE 1-like [Malus domestica]
MD03G1222300	[O]	Posttranslational modification, protein turnover, chaperones	--	--	--	--	Peptidyl-prolyl cis-trans isomerase CYP37, chloroplastic OS=Arabidopsis thaliana GN=CYP37 PE=1 SV=3	O	Posttranslational modification, protein turnover, chaperones	PREDICTED: peptidyl-prolyl cis-trans isomerase CYP37, chloroplastic isoform X1 [Malus domestica]
MD09G1145500	[RTKL]	--	--	--	--	--	Wall-associated receptor kinase-like 2 OS=Arabidopsis thaliana GN=WAKL2 PE=2 SV=1	T	Signal transduction mechanisms	PREDICTED: LOW QUALITY PROTEIN: wall-associated receptor kinase-like 22 [Malus domestica]
MD16G1165600	[V]	Defense mechanisms	Biological Process: drug transmembrane transport (GO:0006855);; Molecular Function: drug transmembrane transporter activity (GO:0015238);; Molecular Function: antiporter activity (GO:0015297);; Cellular Component: membrane (GO:0016020);;	K03327|0|mdm:103403737|MATE efflux family protein 5; K03327 multidrug resistance protein, MATE family (A)	[R]	General function prediction only	Protein DETOXIFICATION 55 OS=Arabidopsis thaliana GN=DTX55 PE=2 SV=1	V	Defense mechanisms	PREDICTED: protein DETOXIFICATION 55 [Malus domestica]
MD16G1001500	[O]	Posttranslational modification, protein turnover, chaperones	--	--	[O]	Posttranslational modification, protein turnover, chaperones	Katanin p60 ATPase-containing subunit A1 OS=Arabidopsis thaliana GN=AAA1 PE=1 SV=1	O	Posttranslational modification, protein turnover, chaperones	PREDICTED: uncharacterized protein LOC103403400 isoform X2 [Malus domestica]
MD04G1012800	--	--	--	--	--	--	--	S	Function unknown	PREDICTED: uncharacterized protein LOC103963523 [Pyrus x bretschneideri]
MD14G1246000	[S]	Function unknown	Biological Process: transmembrane transport (GO:0055085);;	--	--	--	Probable metal-nicotianamine transporter YSL8 OS=Arabidopsis thaliana GN=YSL8 PE=1 SV=2	S	Function unknown	PREDICTED: probable metal-nicotianamine transporter YSL7 [Malus domestica]
MD05G1309700	--	--	Molecular Function: DNA binding (GO:0003677);; Molecular Function: protein kinase activity (GO:0004672);; Molecular Function: ATP binding (GO:0005524);; Biological Process: regulation of transcription, DNA-templated (GO:0006355);; Biological Process: protein phosphorylation (GO:0006468);; Biological Process: ethylene biosynthetic process (GO:0009693);;	--	--	--	NAC domain-containing protein 73 OS=Arabidopsis thaliana GN=NAC073 PE=2 SV=1	S	Function unknown	PREDICTED: NAC domain-containing protein 73 [Malus domestica]
MD04G1038500	[RTKL]	--	Molecular Function: protein tyrosine kinase activity (GO:0004713);; Molecular Function: ATP binding (GO:0005524);; Cellular Component: plasma membrane (GO:0005886);; Biological Process: protein phosphorylation (GO:0006468);;	K13436|0|pxb:103929928|PTI1-like tyrosine-protein kinase 3; K13436 pto-interacting protein 1 [EC:2.7.11.1] (A)	[T]	Signal transduction mechanisms	PTI1-like tyrosine-protein kinase 3 OS=Arabidopsis thaliana GN=PTI13 PE=1 SV=1	T	Signal transduction mechanisms	PREDICTED: PTI1-like tyrosine-protein kinase 3 isoform X2 [Malus domestica]
MD11G1246700	--	--	--	K10581|0|mdm:103413292|probable ubiquitin-conjugating enzyme E2 26; K10581 ubiquitin-conjugating enzyme E2 O [EC:6.3.2.19] (A)	[O]	Posttranslational modification, protein turnover, chaperones	Putative ubiquitin-conjugating enzyme E2 38 OS=Arabidopsis thaliana GN=UBC38 PE=3 SV=2	O	Posttranslational modification, protein turnover, chaperones	PREDICTED: probable ubiquitin-conjugating enzyme E2 25 isoform X1 [Malus domestica]
MD08G1003700	[O]	Posttranslational modification, protein turnover, chaperones	Molecular Function: metalloendopeptidase activity (GO:0004222);; Molecular Function: ATP binding (GO:0005524);; Biological Process: proteolysis (GO:0006508);; Cellular Component: membrane (GO:0016020);; Molecular Function: nucleoside-triphosphatase activity (GO:0017111);; Biological Process: protein catabolic process (GO:0030163);;	K03798|0|mdm:103440202|ATP-dependent zinc metalloprotease FTSH, chloroplastic; K03798 cell division protease FtsH [EC:3.4.24.-] (A)	[O]	Posttranslational modification, protein turnover, chaperones	ATP-dependent zinc metalloprotease FTSH, chloroplastic OS=Nicotiana tabacum GN=FTSH PE=2 SV=2	O	Posttranslational modification, protein turnover, chaperones	PREDICTED: ATP-dependent zinc metalloprotease FTSH, chloroplastic [Malus domestica]
MD00G1017300	--	--	Biological Process: fatty acid biosynthetic process (GO:0006633);; Cellular Component: chloroplast (GO:0009507);; Molecular Function: acyl-[acyl-carrier-protein] desaturase activity (GO:0045300);; Molecular Function: transition metal ion binding (GO:0046914);; Biological Process: oxidation-reduction process (GO:0055114);;	K03921|0|mdm:103434298|acyl-[acyl-carrier-protein] desaturase, chloroplastic; K03921 acyl-[acyl-carrier-protein] desaturase [EC:1.14.19.2] (A)	--	--	Stearoyl-[acyl-carrier-protein] 9-desaturase, chloroplastic OS=Ricinus communis PE=1 SV=1	I	Lipid transport and metabolism	PREDICTED: stearoyl-[acyl-carrier-protein] 9-desaturase, chloroplastic [Malus domestica]
MD14G1213700	--	--	--	--	--	--	--	S	Function unknown	PREDICTED: uncharacterized protein LOC103930487 isoform X2 [Pyrus x bretschneideri]
MD03G1199100	[BK]	--	--	K11723|0|pxb:103951374|uncharacterized LOC103951374; K11723 bromodomain-containing protein 7/9 (A)	--	--	Histone acetyltransferase GCN5 OS=Oryza sativa subsp. japonica GN=GCN5 PE=2 SV=1	BK	--	PREDICTED: uncharacterized protein LOC103951374 [Pyrus x bretschneideri]
MD02G1012500	[F]	Nucleotide transport and metabolism	Molecular Function: adenylate kinase activity (GO:0004017);; Molecular Function: ATP binding (GO:0005524);; Biological Process: DNA-templated transcription, elongation (GO:0006354);; Cellular Component: chloroplast thylakoid membrane (GO:0009535);; Cellular Component: chloroplast envelope (GO:0009941);; Biological Process: photosynthesis (GO:0015979);; Biological Process: nucleotide phosphorylati…	K00939|0|pxb:103933874|adenylate kinase 5, chloroplastic-like; K00939 adenylate kinase [EC:2.7.4.3] (A)	[F]	Nucleotide transport and metabolism	Adenylate kinase 5, chloroplastic OS=Arabidopsis thaliana GN=At5g35170 PE=1 SV=1	F	Nucleotide transport and metabolism	PREDICTED: adenylate kinase 5, chloroplastic isoform X2 [Malus domestica]
MD12G1249600	--	--	--	--	--	--	Myb family transcription factor PHL13 OS=Arabidopsis thaliana GN=PHL13 PE=2 SV=1	K	Transcription	PREDICTED: protein PHR1-LIKE 1 isoform X1 [Malus domestica]
MD12G1184100	[E]	Amino acid transport and metabolism	--	K00827|0|mdm:103450725|alanine--glyoxylate aminotransferase 2 homolog 2, mitochondrial-like; K00827 alanine-glyoxylate transaminase / (R)-3-amino-2-methylpropionate-pyruvate transaminase [EC:2.6.1.44 2.6.1.40] (A)	[E]	Amino acid transport and metabolism	Alanine--glyoxylate aminotransferase 2 homolog 2, mitochondrial OS=Arabidopsis thaliana GN=AGT3 PE=1 SV=2	E	Amino acid transport and metabolism	PREDICTED: alanine--glyoxylate aminotransferase 2 homolog 2, mitochondrial-like [Malus domestica]
MD12G1227700	[R]	General function prediction only	--	--	[R]	General function prediction only	Haloacid dehalogenase-like hydrolase domain-containing protein Sgpp OS=Arabidopsis thaliana GN=SGPP PE=1 SV=2	S	Function unknown	PREDICTED: haloacid dehalogenase-like hydrolase domain-containing protein Sgpp isoform X2 [Malus domestica]
MD07G1112800	[DK]	--	Cellular Component: membrane (GO:0016020);;	K12604|5.52319e-130|pxb:103940468|CCR4-NOT transcription complex subunit 1-like; K12604 CCR4-NOT transcription complex subunit 1 (A)	[K]	Transcription	--	K	Transcription	PREDICTED: CCR4-NOT transcription complex subunit 1-like isoform X2 [Pyrus x bretschneideri]
MD14G1192600	--	--	Molecular Function: ATP binding (GO:0005524);; Biological Process: ATP catabolic process (GO:0006200);; Biological Process: ATP biosynthetic process (GO:0006754);; Biological Process: cation transport (GO:0006812);; Cellular Component: integral component of membrane (GO:0016021);; Molecular Function: cation-transporting ATPase activity (GO:0019829);; Molecular Function: metal ion binding (GO:0046…	K01535|0|pxb:103935396|ATPase 11, plasma membrane-type-like; K01535 H+-transporting ATPase [EC:3.6.3.6] (A)	[P]	Inorganic ion transport and metabolism	ATPase 11, plasma membrane-type OS=Arabidopsis thaliana GN=AHA11 PE=1 SV=1	P	Inorganic ion transport and metabolism	PREDICTED: ATPase 11, plasma membrane-type-like [Pyrus x bretschneideri]
MD02G1152800	[E]	Amino acid transport and metabolism	Molecular Function: aminopeptidase activity (GO:0004177);; Cellular Component: cytosol (GO:0005829);; Cellular Component: plasma membrane (GO:0005886);; Biological Process: protein N-linked glycosylation (GO:0006487);; Biological Process: lipid transport (GO:0006869);; Biological Process: intra-Golgi vesicle-mediated transport (GO:0006891);; Biological Process: auxin polar transport (GO:0009926);…	K01262|0|pxb:103963181|probable Xaa-Pro aminopeptidase P; K01262 Xaa-Pro aminopeptidase [EC:3.4.11.9] (A)	[E]	Amino acid transport and metabolism	--	E	Amino acid transport and metabolism	PREDICTED: probable Xaa-Pro aminopeptidase P [Pyrus x bretschneideri]
MD08G1178700	--	--	Cellular Component: extracellular space (GO:0005615);; Biological Process: calcium ion transport (GO:0006816);; Biological Process: Golgi organization (GO:0007030);; Biological Process: response to salt stress (GO:0009651);; Biological Process: cysteine biosynthetic process (GO:0019344);; Biological Process: cell wall biogenesis (GO:0042546);;	--	--	--	Protein DOWNSTREAM OF FLC OS=Arabidopsis thaliana GN=DFC PE=2 SV=1	S	Function unknown	PREDICTED: protein DOWNSTREAM OF FLC-like [Malus domestica]
MD15G1096500	[EH]	--	--	K18482|0|pxb:103957470|branched-chain-amino-acid aminotransferase-like protein 3, chloroplastic; K18482 4-amino-4-deoxychorismate lyase [EC:4.1.3.38] (A)	[E]	Amino acid transport and metabolism	D-amino-acid transaminase, chloroplastic OS=Arabidopsis thaliana GN=DAAT PE=1 SV=1	E	Amino acid transport and metabolism	PREDICTED: D-amino-acid transaminase, chloroplastic [Pyrus x bretschneideri]
MD11G1270500	[M]	Cell wall/membrane/envelope biogenesis	Molecular Function: nucleotide binding (GO:0000166);; Cellular Component: cytosol (GO:0005829);; Molecular Function: dTDP-glucose 4,6-dehydratase activity (GO:0008460);; Molecular Function: dTDP-4-dehydrorhamnose reductase activity (GO:0008831);; Cellular Component: plasmodesma (GO:0009506);; Biological Process: response to sucrose (GO:0009744);; Biological Process: response to UV-B (GO:0010224);…	K12450|0|pxb:103965391|probable rhamnose biosynthetic enzyme 1; K12450 UDP-glucose 4,6-dehydratase [EC:4.2.1.76] (A)	[G]	Carbohydrate transport and metabolism	Trifunctional UDP-glucose 4,6-dehydratase/UDP-4-keto-6-deoxy-D-glucose 3,5-epimerase/UDP-4-keto-L-rhamnose-reductase RHM1 OS=Arabidopsis thaliana GN=RHM1 PE=1 SV=1	M	Cell wall/membrane/envelope biogenesis	PREDICTED: trifunctional UDP-glucose 4,6-dehydratase/UDP-4-keto-6-deoxy-D-glucose 3,5-epimerase/UDP-4-keto-L-rhamnose-reductase RHM1 isoform X1 [Pyrus x bretschneideri]
MD12G1220300	--	--	--	--	--	--	--	S	Function unknown	PREDICTED: uncharacterized protein LOC103450953 isoform X1 [Malus domestica]
MD06G1002700	--	--	--	--	[S]	Function unknown	Protein PIN-LIKES 3 OS=Arabidopsis thaliana GN=PILS3 PE=2 SV=1	S	Function unknown	PREDICTED: protein PIN-LIKES 3-like [Malus domestica]
MD12G1120400	--	--	Molecular Function: SNAP receptor activity (GO:0005484);; Biological Process: intracellular protein transport (GO:0006886);; Cellular Component: membrane (GO:0016020);;	K08506|1.68834e-179|mdm:103450064|syntaxin-71-like; K08506 syntaxin of plants SYP7 (A)	--	--	Syntaxin-71 OS=Arabidopsis thaliana GN=SYP71 PE=1 SV=1	U	Intracellular trafficking, secretion, and vesicular transport	PREDICTED: syntaxin-71-like [Malus domestica]
MD10G1219100	--	--	--	--	[R]	General function prediction only	30-kDa cleavage and polyadenylation specificity factor 30 OS=Arabidopsis thaliana GN=CPSF30 PE=1 SV=1	S	Function unknown	PREDICTED: YTH domain-containing family protein 2-like isoform X2 [Malus domestica]
MD07G1145800	--	--	--	K14684|0|pxb:103966433|mitochondrial adenine nucleotide transporter ADNT1-like; K14684 solute carrier family 25 (mitochondrial phosphate transporter), member 23/24/25/41 (A)	[C]	Energy production and conversion	Mitochondrial adenine nucleotide transporter ADNT1 OS=Arabidopsis thaliana GN=ADNT1 PE=1 SV=1	S	Function unknown	PREDICTED: mitochondrial adenine nucleotide transporter ADNT1-like [Pyrus x bretschneideri]
MD08G1015600	--	--	Molecular Function: methyltransferase activity (GO:0008168);; Biological Process: methylation (GO:0032259);;	--	--	--	--	S	Function unknown	PREDICTED: uncharacterized protein LOC103420870 [Malus domestica]
MD10G1342200	--	--	--	--	[R]	General function prediction only	--	S	Function unknown	PREDICTED: uncharacterized protein LOC103414554 isoform X1 [Malus domestica]
MD05G1120100	[O]	Posttranslational modification, protein turnover, chaperones	Molecular Function: serine-type endopeptidase activity (GO:0004252);; Cellular Component: extracellular region (GO:0005576);; Biological Process: proteolysis (GO:0006508);; Molecular Function: identical protein binding (GO:0042802);; Biological Process: negative regulation of catalytic activity (GO:0043086);;	--	--	--	Subtilisin-like protease SBT1.6 OS=Arabidopsis thaliana GN=SBT1.6 PE=2 SV=1	O	Posttranslational modification, protein turnover, chaperones	PREDICTED: subtilisin-like protease SBT1.6 [Malus domestica]
MD13G1245500	[J]	Translation, ribosomal structure and biogenesis	Molecular Function: RNA binding (GO:0003723);;	K17943|0|mdm:103453792|pumilio homolog 6, chloroplastic; K17943 pumilio RNA-binding family (A)	[J]	Translation, ribosomal structure and biogenesis	Pumilio homolog 6, chloroplastic OS=Arabidopsis thaliana GN=APUM6 PE=1 SV=1	J	Translation, ribosomal structure and biogenesis	PREDICTED: pumilio homolog 6, chloroplastic [Malus domestica]
MD15G1006700	--	--	--	--	[O]	Posttranslational modification, protein turnover, chaperones	Thioredoxin-like protein CDSP32, chloroplastic OS=Arabidopsis thaliana GN=CDSP32 PE=1 SV=1	O	Posttranslational modification, protein turnover, chaperones	PREDICTED: thioredoxin-like protein CDSP32, chloroplastic [Malus domestica]
MD13G1063400	--	--	--	--	[R]	General function prediction only	Pentatricopeptide repeat-containing protein At1g26460, mitochondrial OS=Arabidopsis thaliana GN=At1g26460 PE=1 SV=1	S	Function unknown	PREDICTED: pentatricopeptide repeat-containing protein At1g26460, mitochondrial-like [Malus domestica]
MD07G1034400	--	--	--	--	--	--	--	--	--	PREDICTED: proline-rich protein 4-like [Pyrus x bretschneideri]
MD07G1194200	--	--	--	--	--	--	--	S	Function unknown	PREDICTED: uncharacterized protein LOC103939111 isoform X2 [Pyrus x bretschneideri]
MD10G1097200	[R]	General function prediction only	Molecular Function: zinc ion binding (GO:0008270);; Molecular Function: oxidoreductase activity (GO:0016491);; Biological Process: oxidation-reduction process (GO:0055114);;	K00083|0|mdm:103425085|probable cinnamyl alcohol dehydrogenase 1; K00083 cinnamyl-alcohol dehydrogenase [EC:1.1.1.195] (A)	[Q]	Secondary metabolites biosynthesis, transport and catabolism	Probable cinnamyl alcohol dehydrogenase 2 OS=Eucalyptus gunnii GN=CAD2 PE=2 SV=1	C	Energy production and conversion	PREDICTED: probable cinnamyl alcohol dehydrogenase 1 [Malus domestica]
MD09G1028200	--	--	--	--	--	--	Protein RST1 OS=Arabidopsis thaliana GN=RST1 PE=2 SV=2	S	Function unknown	PREDICTED: protein RST1-like [Malus domestica]
MD07G1200200	--	--	Biological Process: gene silencing by RNA (GO:0031047);;	--	--	--	Protein INVOLVED IN DE NOVO 2 OS=Arabidopsis thaliana GN=IDN2 PE=1 SV=1	S	Function unknown	PREDICTED: protein INVOLVED IN DE NOVO 2 [Malus domestica]
MD01G1069200	--	--	--	--	--	--	Protein BPS1, chloroplastic OS=Arabidopsis thaliana GN=BPS1 PE=2 SV=1	S	Function unknown	PREDICTED: protein BPS1, chloroplastic-like [Malus domestica]
MD09G1181200	[Q]	Secondary metabolites biosynthesis, transport and catabolism	Molecular Function: monooxygenase activity (GO:0004497);; Molecular Function: iron ion binding (GO:0005506);; Molecular Function: electron carrier activity (GO:0009055);; Molecular Function: oxidoreductase activity, acting on paired donors, with incorporation or reduction of molecular oxygen (GO:0016705);; Molecular Function: heme binding (GO:0020037);; Biological Process: oxidation-reduction pro…	--	[Q]	Secondary metabolites biosynthesis, transport and catabolism	Cytochrome P450 71A1 OS=Persea americana GN=CYP71A1 PE=1 SV=2	Q	Secondary metabolites biosynthesis, transport and catabolism	PREDICTED: cytochrome P450 71A1-like [Pyrus x bretschneideri]
MD17G1027400	--	--	--	--	--	--	--	--	--	PREDICTED: uncharacterized protein LOC103404285 [Malus domestica]
MD09G1193900	[G]	Carbohydrate transport and metabolism	Molecular Function: beta-galactosidase activity (GO:0004565);; Biological Process: carbohydrate metabolic process (GO:0005975);; Molecular Function: carbohydrate binding (GO:0030246);;	--	[G]	Carbohydrate transport and metabolism	Beta-galactosidase 1 OS=Arabidopsis thaliana GN=BGAL1 PE=2 SV=1	G	Carbohydrate transport and metabolism	PREDICTED: beta-galactosidase 1 [Malus domestica]
MD10G1289100	--	--	--	--	--	--	Homeobox-DDT domain protein RLT1 OS=Arabidopsis thaliana GN=RLT1 PE=1 SV=1	K	Transcription	PREDICTED: homeobox-DDT domain protein RLT1 isoform X2 [Malus domestica]
MD03G1203900	[R]	General function prediction only	--	--	[G]	Carbohydrate transport and metabolism	Purple acid phosphatase 18 OS=Arabidopsis thaliana GN=PAP18 PE=2 SV=1	S	Function unknown	PREDICTED: purple acid phosphatase 18-like [Malus domestica]
MD03G1214100	[MG]	--	Molecular Function: catalytic activity (GO:0003824);; Biological Process: cellular metabolic process (GO:0044237);; Molecular Function: coenzyme binding (GO:0050662);;	--	[V]	Defense mechanisms	Putative anthocyanidin reductase OS=Ginkgo biloba PE=2 SV=1	M	Cell wall/membrane/envelope biogenesis	PREDICTED: dihydroflavonol-4-reductase-like isoform X1 [Malus domestica]
MD01G1111300	[BK]	--	--	--	[K]	Transcription	Transcription factor GTE1 OS=Arabidopsis thaliana GN=GTE1 PE=2 SV=1	BK	--	PREDICTED: transcription factor GTE1-like [Malus domestica]
MD10G1080000	[GEPR]	--	Cellular Component: integral component of membrane (GO:0016021);; Molecular Function: substrate-specific transmembrane transporter activity (GO:0022891);; Biological Process: transmembrane transport (GO:0055085);;	--	[R]	General function prediction only	Polyol transporter 5 OS=Arabidopsis thaliana GN=PLT5 PE=1 SV=2	G	Carbohydrate transport and metabolism	PREDICTED: putative polyol transporter 1 [Malus domestica]
MD11G1181200	[H]	Coenzyme transport and metabolism	Biological Process: Mo-molybdopterin cofactor biosynthetic process (GO:0006777);;	K15376|0|pxb:103964869|molybdopterin biosynthesis protein CNX1-like; K15376 gephyrin [EC:2.10.1.1 2.7.7.75] (A)	[H]	Coenzyme transport and metabolism	Molybdopterin biosynthesis protein CNX1 OS=Arabidopsis thaliana GN=CNX1 PE=1 SV=2	H	Coenzyme transport and metabolism	PREDICTED: molybdopterin biosynthesis protein CNX1-like [Pyrus x bretschneideri]
MD10G1264300	--	--	--	--	[R]	General function prediction only	High mobility group B protein 14 OS=Arabidopsis thaliana GN=HMGB14 PE=2 SV=2	B	Chromatin structure and dynamics	PREDICTED: high mobility group B protein 14-like isoform X2 [Malus domestica]
MD16G1253800	[G]	Carbohydrate transport and metabolism	Biological Process: carbohydrate metabolic process (GO:0005975);; Molecular Function: isomerase activity (GO:0016853);; Molecular Function: carbohydrate binding (GO:0030246);;	K01792|0|pxb:103949362|putative glucose-6-phosphate 1-epimerase; K01792 glucose-6-phosphate 1-epimerase [EC:5.1.3.15] (A)	[G]	Carbohydrate transport and metabolism	Putative glucose-6-phosphate 1-epimerase OS=Cenchrus ciliaris PE=2 SV=1	G	Carbohydrate transport and metabolism	PREDICTED: putative glucose-6-phosphate 1-epimerase [Pyrus x bretschneideri]
MD02G1067100	--	--	--	K01301|0|mdm:103406790|probable glutamate carboxypeptidase 2; K01301 N-acetylated-alpha-linked acidic dipeptidase [EC:3.4.17.21] (A)	[OPR]	--	Probable glutamate carboxypeptidase LAMP1 OS=Arabidopsis thaliana GN=LAMP1 PE=2 SV=1	S	Function unknown	PREDICTED: probable glutamate carboxypeptidase 2 [Malus domestica]
MD09G1036800	--	--	--	--	--	--	WAT1-related protein At5g40230 OS=Arabidopsis thaliana GN=At5g40230 PE=3 SV=1	S	Function unknown	PREDICTED: uncharacterized protein LOC103936434 [Pyrus x bretschneideri]
MD14G1000100	--	--	--	--	[R]	General function prediction only	--	S	Function unknown	uncharacterized protein LOC18776201 [Prunus persica]
MD05G1030500	[O]	Posttranslational modification, protein turnover, chaperones	Cellular Component: cell wall (GO:0005618);; Cellular Component: mitochondrial respiratory chain complex I (GO:0005747);; Cellular Component: vacuole (GO:0005773);; Cellular Component: plasma membrane (GO:0005886);; Biological Process: response to stress (GO:0006950);; Cellular Component: chloroplast (GO:0009507);;	K17081|0|pxb:103965257|prohibitin-1, mitochondrial-like; K17081 prohibitin 2 (A)	[O]	Posttranslational modification, protein turnover, chaperones	Prohibitin-1, mitochondrial OS=Arabidopsis thaliana GN=PHB1 PE=1 SV=1	O	Posttranslational modification, protein turnover, chaperones	PREDICTED: prohibitin-1, mitochondrial-like [Pyrus x bretschneideri]
MD12G1095800	[L]	Replication, recombination and repair	Molecular Function: DNA binding (GO:0003677);; Molecular Function: DNA topoisomerase type II (ATP-hydrolyzing) activity (GO:0003918);; Molecular Function: ATP binding (GO:0005524);; Cellular Component: chromosome (GO:0005694);; Cellular Component: mitochondrion (GO:0005739);; Biological Process: DNA topological change (GO:0006265);; Cellular Component: chloroplast (GO:0009507);;	K02470|0|pmum:103339188|DNA gyrase subunit B, chloroplastic/mitochondrial; K02470 DNA gyrase subunit B [EC:5.99.1.3] (A)	[B]	Chromatin structure and dynamics	DNA gyrase subunit B, chloroplastic/mitochondrial OS=Nicotiana benthamiana GN=GYRB PE=2 SV=1	L	Replication, recombination and repair	DNA gyrase subunit B, chloroplastic/mitochondrial-like [Prunus avium]
MD09G1121600	--	--	--	K18834|0|mdm:103442976|WRKY transcription factor 1-like; K18834 WRKY transcription factor 1 (A)	--	--	WRKY transcription factor 1 OS=Arabidopsis thaliana GN=WRKY1 PE=1 SV=1	K	Transcription	PREDICTED: WRKY transcription factor 1-like [Malus domestica]
MD11G1071500	--	--	--	--	--	--	Increased DNA methylation 1 OS=Arabidopsis thaliana GN=IDM1 PE=1 SV=1	S	Function unknown	PREDICTED: uncharacterized protein LOC103429947 [Malus domestica]
MD11G1183900	[TZDR]	--	--	K02183|1.02682e-103|brp:103864746|calmodulin-7-like; K02183 calmodulin (A)	[T]	Signal transduction mechanisms	Calmodulin OS=Lilium longiflorum PE=2 SV=2	DTZ	--	hypothetical protein CDL15_Pgr003035 [Punica granatum]
MD08G1168300	[M]	Cell wall/membrane/envelope biogenesis	--	--	--	--	--	M	Cell wall/membrane/envelope biogenesis	PREDICTED: uncharacterized protein LOC103936485 [Pyrus x bretschneideri]
MD12G1240900	[MG]	--	Cellular Component: cytosol (GO:0005829);; Biological Process: nucleotide-sugar metabolic process (GO:0009225);; Biological Process: L-ascorbic acid biosynthetic process (GO:0019853);; Molecular Function: GDP-mannose 3,5-epimerase activity (GO:0047918);; Molecular Function: NAD binding (GO:0051287);;	K10046|0|mdm:103430505|GDP-mannose 3,5-epimerase 2; K10046 GDP-D-mannose 3', 5'-epimerase [EC:5.1.3.18 5.1.3.-] (A)	[GM]	--	GDP-mannose 3,5-epimerase 1 OS=Oryza sativa subsp. indica GN=OsI_032456 PE=2 SV=1	M	Cell wall/membrane/envelope biogenesis	PREDICTED: GDP-mannose 3,5-epimerase 2 [Pyrus x bretschneideri]
MD10G1323000	[EH]	--	Molecular Function: oxidoreductase activity, acting on a sulfur group of donors, disulfide as acceptor (GO:0016671);; Biological Process: sulfate reduction (GO:0019419);; Biological Process: cell redox homeostasis (GO:0045454);;	K05907|0|mdm:103409471|5'-adenylylsulfate reductase 3, chloroplastic-like; K05907 adenylyl-sulfate reductase (glutathione) [EC:1.8.4.9] (A)	[E]	Amino acid transport and metabolism	5&apos;-adenylylsulfate reductase 3, chloroplastic OS=Arabidopsis thaliana GN=APR3 PE=2 SV=2	P	Inorganic ion transport and metabolism	PREDICTED: 5&apos;-adenylylsulfate reductase 3, chloroplastic-like [Malus domestica]
MD11G1279000	--	--	Biological Process: primary metabolic process (GO:0044238);; Biological Process: cellular macromolecule metabolic process (GO:0044260);;	K06692|5.69806e-140|pxb:103931510|uncharacterized LOC103931510; K06692 26S proteasome non-ATPase regulatory subunit 5 (A)	[O]	Posttranslational modification, protein turnover, chaperones	--	O	Posttranslational modification, protein turnover, chaperones	PREDICTED: uncharacterized protein LOC103448954 [Malus domestica]
MD13G1125000	--	--	Molecular Function: DNA binding (GO:0003677);; Biological Process: regulation of transcription, DNA-templated (GO:0006355);;	--	--	--	NAC domain-containing protein 83 OS=Arabidopsis thaliana GN=NAC083 PE=1 SV=1	K	Transcription	PREDICTED: NAC domain-containing protein 83-like [Malus domestica]
MD05G1000300	[S]	Function unknown	--	--	--	--	Uncharacterized protein ycf45 OS=Porphyra purpurea GN=ycf45 PE=3 SV=1	S	Function unknown	PREDICTED: uncharacterized protein ycf45 [Malus domestica]
MD14G1176600	--	--	--	--	--	--	--	S	Function unknown	PREDICTED: uncharacterized protein LOC103415230 isoform X1 [Malus domestica]
MD11G1260600	--	--	--	--	--	--	Increased DNA methylation 1 OS=Arabidopsis thaliana GN=IDM1 PE=1 SV=1	S	Function unknown	PREDICTED: increased DNA methylation 1-like [Pyrus x bretschneideri]
MD13G1203600	[E]	Amino acid transport and metabolism	--	K01303|0|pxb:103929772|acylamino-acid-releasing enzyme-like; K01303 acylaminoacyl-peptidase [EC:3.4.19.1] (A)	[O]	Posttranslational modification, protein turnover, chaperones	Acylamino-acid-releasing enzyme OS=Arabidopsis thaliana GN=AARE PE=1 SV=1	E	Amino acid transport and metabolism	PREDICTED: LOW QUALITY PROTEIN: acylamino-acid-releasing enzyme-like [Malus domestica]
MD02G1283400	--	--	--	--	[K]	Transcription	Trihelix transcription factor ASIL2 OS=Arabidopsis thaliana GN=ASIL2 PE=2 SV=1	K	Transcription	PREDICTED: trihelix transcription factor ASIL2-like [Malus domestica]
MD00G1001400	[RTKL]	--	--	K08829|0|pxb:103955563|cyclin-dependent kinase F-4; K08829 male germ cell-associated kinase [EC:2.7.11.22] (A)	[T]	Signal transduction mechanisms	Cyclin-dependent kinase F-4 OS=Oryza sativa subsp. japonica GN=CDKF-4 PE=2 SV=1	T	Signal transduction mechanisms	PREDICTED: cyclin-dependent kinase F-4 [Pyrus x bretschneideri]
MD15G1227600	[O]	Posttranslational modification, protein turnover, chaperones	--	K00384|0|pxb:103950195|thioredoxin reductase NTRB-like; K00384 thioredoxin reductase (NADPH) [EC:1.8.1.9] (A)	[O]	Posttranslational modification, protein turnover, chaperones	Thioredoxin reductase 2 OS=Arabidopsis thaliana GN=NTR2 PE=2 SV=2	O	Posttranslational modification, protein turnover, chaperones	PREDICTED: thioredoxin reductase NTRB-like isoform X1 [Pyrus x bretschneideri]
MD11G1119700	[RTKL]	--	Molecular Function: phosphorelay sensor kinase activity (GO:0000155);; Biological Process: phosphorelay signal transduction system (GO:0000160);; Molecular Function: protein serine/threonine kinase activity (GO:0004674);; Molecular Function: ATP binding (GO:0005524);; Cellular Component: vacuole (GO:0005773);; Biological Process: regulation of transcription, DNA-templated (GO:0006355);; Biologica…	--	--	--	Phototropin-1 OS=Arabidopsis thaliana GN=PHOT1 PE=1 SV=1	T	Signal transduction mechanisms	putative LOV domain-containing protein [Amelanchier canadensis]
MD05G1249100	--	--	--	--	--	--	Protein FAR-RED IMPAIRED RESPONSE 1 OS=Arabidopsis thaliana GN=FAR1 PE=1 SV=1	S	Function unknown	PREDICTED: protein FAR-RED IMPAIRED RESPONSE 1-like isoform X1 [Malus domestica]
MD04G1150900	--	--	--	--	--	--	--	S	Function unknown	PREDICTED: endochitinase A-like [Malus domestica]
MD01G1079500	--	--	--	--	--	--	--	S	Function unknown	PREDICTED: uncharacterized protein LOC103414221 isoform X2 [Malus domestica]
MD09G1117900	[K]	Transcription	Cellular Component: nucleus (GO:0005634);; Biological Process: DNA-templated transcription, initiation (GO:0006352);; Molecular Function: protein heterodimerization activity (GO:0046982);; Biological Process: regulation of sequence-specific DNA binding transcription factor activity (GO:0051090);;	K03131|0|pxb:103955030|transcription initiation factor TFIID subunit 6-like; K03131 transcription initiation factor TFIID subunit 6 (A)	[K]	Transcription	Transcription initiation factor TFIID subunit 6 OS=Arabidopsis thaliana GN=TAF6 PE=1 SV=1	K	Transcription	PREDICTED: transcription initiation factor TFIID subunit 6-like isoform X2 [Pyrus x bretschneideri]
MD08G1248300	--	--	--	K12839|0|pxb:103946409|survival of motor neuron-related-splicing factor 30-like; K12839 survival of motor neuron-related-splicing factor 30 (A)	[A]	RNA processing and modification	--	A	RNA processing and modification	PREDICTED: survival of motor neuron-related-splicing factor 30-like isoform X1 [Pyrus x bretschneideri]
MD12G1129500	[P]	Inorganic ion transport and metabolism	--	--	--	--	Thylakoid membrane protein TERC, chloroplastic OS=Arabidopsis thaliana GN=TERC PE=1 SV=1	P	Inorganic ion transport and metabolism	PREDICTED: thylakoid membrane protein TERC, chloroplastic-like isoform X1 [Malus domestica]
MD06G1201900	[R]	General function prediction only	--	K18663|0|mdm:103437877|activating signal cointegrator 1 complex subunit 3; K18663 activating signal cointegrator complex subunit 3 [EC:3.6.4.12] (A)	[A]	RNA processing and modification	DExH-box ATP-dependent RNA helicase DExH14 OS=Arabidopsis thaliana GN=BRR2C PE=2 SV=1	L	Replication, recombination and repair	PREDICTED: DExH-box ATP-dependent RNA helicase DExH14 [Malus domestica]
MD17G1029800	--	--	--	--	--	--	Protein RST1 OS=Arabidopsis thaliana GN=RST1 PE=2 SV=2	S	Function unknown	PREDICTED: protein RST1-like [Malus domestica]
MD12G1244700	--	--	--	--	--	--	F-box protein At5g03970 OS=Arabidopsis thaliana GN=At5g03970 PE=2 SV=1	S	Function unknown	PREDICTED: F-box protein At5g03970 isoform X2 [Malus domestica]
MD03G1159900	[G]	Carbohydrate transport and metabolism	--	--	[R]	General function prediction only	Protein STRICTOSIDINE SYNTHASE-LIKE 3 OS=Arabidopsis thaliana GN=SSL3 PE=2 SV=1	G	Carbohydrate transport and metabolism	PREDICTED: protein STRICTOSIDINE SYNTHASE-LIKE 3-like [Pyrus x bretschneideri]
MD03G1117500	[OC]	--	Molecular Function: protein disulfide isomerase activity (GO:0003756);; Molecular Function: dolichyl-diphosphooligosaccharide-protein glycotransferase activity (GO:0004579);; Cellular Component: mitochondrion (GO:0005739);; Cellular Component: vacuolar membrane (GO:0005774);; Cellular Component: endoplasmic reticulum (GO:0005783);; Cellular Component: plasma membrane (GO:0005886);; Biological Pro…	K09580|0|mdm:103418849|protein disulfide isomerase-like 1-4; K09580 protein disulfide-isomerase A1 [EC:5.3.4.1] (A)	[O]	Posttranslational modification, protein turnover, chaperones	Protein disulfide isomerase-like 1-4 OS=Arabidopsis thaliana GN=PDIL1-4 PE=1 SV=1	O	Posttranslational modification, protein turnover, chaperones	PREDICTED: protein disulfide isomerase-like 1-4 [Malus domestica]
MD13G1221800	--	--	Molecular Function: nucleotide binding (GO:0000166);; Molecular Function: nucleic acid binding (GO:0003676);; Cellular Component: intracellular (GO:0005622);; Biological Process: transport (GO:0006810);;	--	[T]	Signal transduction mechanisms	--	S	Function unknown	PREDICTED: putative G3BP-like protein [Pyrus x bretschneideri]
MD06G1198000	--	--	--	--	--	--	Formin-like protein 20 OS=Arabidopsis thaliana GN=FH20 PE=2 SV=3	S	Function unknown	PREDICTED: formin-like protein 20 isoform X1 [Malus domestica]
MD00G1093300	--	--	--	--	--	--	Pentatricopeptide repeat-containing protein At4g18975, chloroplastic OS=Arabidopsis thaliana GN=At4g18975 PE=2 SV=2	S	Function unknown	PREDICTED: pentatricopeptide repeat-containing protein At4g18975, chloroplastic-like [Malus domestica]
MD11G1259300	[BK]	--	--	--	[K]	Transcription	Transcription factor GTE4 OS=Arabidopsis thaliana GN=GTE4 PE=2 SV=1	BK	--	PREDICTED: transcription factor GTE4 isoform X1 [Malus domestica]
MD15G1262500	--	--	--	--	--	--	--	--	--	hypothetical protein PRUPE_1G537800 [Prunus persica]
MD02G1124600	[S]	Function unknown	--	--	[S]	Function unknown	--	S	Function unknown	PREDICTED: pre-rRNA-processing protein esf1-like [Malus domestica]
MD02G1008300	--	--	Molecular Function: ubiquitin thiolesterase activity (GO:0004221);; Biological Process: ubiquitin-dependent protein catabolic process (GO:0006511);; Molecular Function: cysteine-type peptidase activity (GO:0008234);;	K11855|0|mdm:103447020|ubiquitin carboxyl-terminal hydrolase 23; K11855 ubiquitin carboxyl-terminal hydrolase 36/42 [EC:3.4.19.12] (A)	[O]	Posttranslational modification, protein turnover, chaperones	Ubiquitin carboxyl-terminal hydrolase 23 OS=Arabidopsis thaliana GN=UBP23 PE=2 SV=2	O	Posttranslational modification, protein turnover, chaperones	PREDICTED: ubiquitin carboxyl-terminal hydrolase 23 [Malus domestica]
MD07G1254500	[G]	Carbohydrate transport and metabolism	Molecular Function: sucrose alpha-glucosidase activity (GO:0004575);; Biological Process: carbohydrate metabolic process (GO:0005975);;	K01193|0|mdm:103439640|beta-fructofuranosidase, soluble isoenzyme I-like; K01193 beta-fructofuranosidase [EC:3.2.1.26] (A)	[G]	Carbohydrate transport and metabolism	Acid beta-fructofuranosidase 1, vacuolar OS=Rosa hybrid cultivar PE=1 SV=1	G	Carbohydrate transport and metabolism	PREDICTED: beta-fructofuranosidase, soluble isoenzyme I-like [Malus domestica]
MD12G1047000	[E]	Amino acid transport and metabolism	Cellular Component: integral component of membrane (GO:0016021);;	K14209|0|mdm:103449605|proton-coupled amino acid transporter 3; K14209 solute carrier family 36 (proton-coupled amino acid transporter) (A)	[E]	Amino acid transport and metabolism	Amino acid transporter ANT1 OS=Arabidopsis thaliana GN=ANT1 PE=1 SV=1	E	Amino acid transport and metabolism	PREDICTED: amino acid transporter ANT1 [Malus domestica]
MD08G1197400	[O]	Posttranslational modification, protein turnover, chaperones	--	K08596|0|pxb:103964953|probable ubiquitin-like-specific protease 2B; K08596 sentrin-specific protease 7 [EC:3.4.22.68] (A)	[O]	Posttranslational modification, protein turnover, chaperones	Probable ubiquitin-like-specific protease 2B OS=Arabidopsis thaliana GN=ULP2B PE=1 SV=3	O	Posttranslational modification, protein turnover, chaperones	PREDICTED: probable ubiquitin-like-specific protease 2B isoform X2 [Pyrus x bretschneideri]
MD11G1035700	--	--	--	--	--	--	GBF-interacting protein 1 OS=Arabidopsis thaliana GN=GIP1 PE=1 SV=1	S	Function unknown	PREDICTED: GBF-interacting protein 1-like isoform X2 [Malus domestica]
MD13G1020100	--	--	Biological Process: cytoskeleton organization (GO:0007010);; Molecular Function: microtubule binding (GO:0008017);;	--	--	--	Microtubule-associated protein 70-1 OS=Arabidopsis thaliana GN=MAP70.1 PE=1 SV=1	S	Function unknown	PREDICTED: microtubule-associated protein 70-1-like [Malus domestica]
MD15G1319800	[K]	Transcription	Molecular Function: transcription regulatory region sequence-specific DNA binding (GO:0000976);; Molecular Function: sequence-specific DNA binding transcription factor activity (GO:0003700);; Cellular Component: nucleus (GO:0005634);; Biological Process: regulation of transcription, DNA-templated (GO:0006355);;	K09338|0|mdm:103401624|homeobox-leucine zipper protein ATHB-6-like; K09338 homeobox-leucine zipper protein (A)	[K]	Transcription	Homeobox-leucine zipper protein ATHB-6 OS=Arabidopsis thaliana GN=ATHB-6 PE=1 SV=1	K	Transcription	PREDICTED: homeobox-leucine zipper protein ATHB-6-like [Malus domestica]
MD07G1214000	--	--	--	--	--	--	--	S	Function unknown	PREDICTED: uncharacterized protein LOC103942508 [Pyrus x bretschneideri]
MD17G1035500	--	--	--	--	--	--	Methyl-CpG-binding domain-containing protein 9 OS=Arabidopsis thaliana GN=MBD9 PE=2 SV=1	S	Function unknown	PREDICTED: methyl-CpG-binding domain-containing protein 9 [Pyrus x bretschneideri]
MD09G1000300	--	--	--	K15436|0|mdm:103442063|transportin-3; K15436 transportin-3 (A)	[YU]	--	Transportin MOS14 OS=Arabidopsis thaliana GN=MOS14 PE=1 SV=1	U	Intracellular trafficking, secretion, and vesicular transport	PREDICTED: importin-13 isoform X2 [Malus domestica]
MD16G1187800	[KL]	--	--	K11647|0|mdm:103445899|nuclear protein STH1/NPS1-like; K11647 SWI/SNF-related matrix-associated actin-dependent regulator of chromatin subfamily A member 2/4 [EC:3.6.4.-] (A)	[BK]	--	Probable ATP-dependent DNA helicase CHR12 OS=Arabidopsis thaliana GN=CHR12 PE=2 SV=1	L	Replication, recombination and repair	PREDICTED: probable ATP-dependent DNA helicase CHR12 isoform X2 [Malus domestica]
MD07G1307000	[YU]	--	Cellular Component: nucleus (GO:0005634);; Biological Process: intracellular protein transport (GO:0006886);; Molecular Function: Ran GTPase binding (GO:0008536);;	K14290|0|mdm:103420803|exportin-1-like; K14290 exportin-1 (A)	[YU]	--	Protein EXPORTIN 1A OS=Arabidopsis thaliana GN=XPO1 PE=1 SV=1	U	Intracellular trafficking, secretion, and vesicular transport	PREDICTED: protein EXPORTIN 1A-like [Malus domestica]
MD10G1168300	--	--	Molecular Function: zinc ion binding (GO:0008270);;	--	--	--	--	S	Function unknown	PREDICTED: uncharacterized protein LOC103450907 isoform X1 [Malus domestica]
MD07G1173400	--	--	Molecular Function: dolichyl-diphosphooligosaccharide-protein glycotransferase activity (GO:0004579);; Cellular Component: endoplasmic reticulum (GO:0005783);; Cellular Component: plasma membrane (GO:0005886);; Biological Process: protein glycosylation (GO:0006486);; Cellular Component: plant-type cell wall (GO:0009505);; Cellular Component: integral component of membrane (GO:0016021);;	K12666|0|pxb:103936646|dolichyl-diphosphooligosaccharide--protein glycosyltransferase subunit 1B; K12666 oligosaccharyltransferase complex subunit alpha (ribophorin I) (A)	[O]	Posttranslational modification, protein turnover, chaperones	Dolichyl-diphosphooligosaccharide--protein glycosyltransferase subunit 1B OS=Arabidopsis thaliana GN=OST1B PE=1 SV=1	S	Function unknown	PREDICTED: dolichyl-diphosphooligosaccharide--protein glycosyltransferase subunit 1B [Pyrus x bretschneideri]
MD10G1102000	[T]	Signal transduction mechanisms	Molecular Function: protein serine/threonine phosphatase activity (GO:0004722);; Biological Process: protein dephosphorylation (GO:0006470);; Biological Process: protein targeting to membrane (GO:0006612);; Biological Process: membrane fusion (GO:0006944);; Biological Process: response to chitin (GO:0010200);; Biological Process: regulation of plant-type hypersensitive response (GO:0010363);; Bio…	K01102|0|mdm:103453170|probable protein phosphatase 2C 63; K01102 pyruvate dehydrogenase phosphatase [EC:3.1.3.43] (A)	[T]	Signal transduction mechanisms	Probable protein phosphatase 2C 63 OS=Arabidopsis thaliana GN=At4g33920 PE=2 SV=1	T	Signal transduction mechanisms	PREDICTED: probable protein phosphatase 2C 63 [Malus domestica]
MD16G1240200	--	--	Molecular Function: phospholipase A2 activity (GO:0004623);; Cellular Component: vacuole (GO:0005773);; Cellular Component: Golgi apparatus (GO:0005794);; Biological Process: phospholipid metabolic process (GO:0006644);; Biological Process: lipid catabolic process (GO:0016042);;	K01047|5.32599e-111|mdm:103404077|phospholipase A2-alpha; K01047 secretory phospholipase A2 [EC:3.1.1.4] (A)	--	--	Phospholipase A2-alpha OS=Arabidopsis thaliana GN=PLA2-ALPHA PE=1 SV=1	I	Lipid transport and metabolism	PREDICTED: phospholipase A2-alpha [Malus domestica]
MD11G1305800	[L]	Replication, recombination and repair	Molecular Function: organic cyclic compound binding (GO:0097159);; Molecular Function: heterocyclic compound binding (GO:1901363);;	K10858|0|mdm:103449151|DNA mismatch repair protein PMS1; K10858 DNA mismatch repair protein PMS2 (A)	[L]	Replication, recombination and repair	DNA mismatch repair protein PMS1 OS=Arabidopsis thaliana GN=PMS1 PE=1 SV=1	L	Replication, recombination and repair	PREDICTED: DNA mismatch repair protein PMS1 isoform X1 [Malus domestica]
MD08G1194600	[Z]	Cytoskeleton	--	--	[Z]	Cytoskeleton	Myosin-4 OS=Arabidopsis thaliana GN=VIII-B PE=3 SV=1	Z	Cytoskeleton	PREDICTED: myosin-2-like isoform X1 [Malus domestica]
MD03G1038300	--	--	--	--	--	--	--	--	--	PREDICTED: uncharacterized protein LOC108171868 [Malus domestica]
MD10G1342300	--	--	--	--	[R]	General function prediction only	--	S	Function unknown	PREDICTED: uncharacterized protein LOC103410859 [Malus domestica]
MD05G1179700	--	--	--	--	[R]	General function prediction only	Pentatricopeptide repeat-containing protein At5g48910 OS=Arabidopsis thaliana GN=PCMP-H38 PE=2 SV=1	S	Function unknown	PREDICTED: pentatricopeptide repeat-containing protein At5g48910 [Malus domestica]
MD01G1165900	[P]	Inorganic ion transport and metabolism	--	K03549|0|mdm:103417793|potassium transporter 2-like; K03549 KUP system potassium uptake protein (A)	--	--	Potassium transporter 2 OS=Arabidopsis thaliana GN=POT2 PE=1 SV=2	P	Inorganic ion transport and metabolism	PREDICTED: potassium transporter 2-like [Malus domestica]
MD15G1405900	--	--	Molecular Function: transporter activity (GO:0005215);; Cellular Component: intracellular (GO:0005622);; Biological Process: transport (GO:0006810);; Cellular Component: integral component of membrane (GO:0016021);;	--	[I]	Lipid transport and metabolism	Patellin-3 OS=Arabidopsis thaliana GN=PATL3 PE=1 SV=2	S	Function unknown	PREDICTED: patellin-3-like [Malus domestica]
MD17G1085700	--	--	--	K00901|9.78398e-154|mdm:103404756|diacylglycerol kinase 5; K00901 diacylglycerol kinase (ATP) [EC:2.7.1.107] (A)	[IT]	--	Diacylglycerol kinase 5 OS=Arabidopsis thaliana GN=DGK5 PE=2 SV=1	I	Lipid transport and metabolism	PREDICTED: LOW QUALITY PROTEIN: diacylglycerol kinase 5 [Malus domestica]
MD09G1285000	[S]	Function unknown	--	K09008|1.47821e-118|mdm:103444276|NADH dehydrogenase [ubiquinone] 1 alpha subcomplex assembly factor 3-like; K09008 NADH dehydrogenase [ubiquinone] 1 alpha subcomplex assembly factor 3 (A)	[S]	Function unknown	--	S	Function unknown	PREDICTED: NADH dehydrogenase [ubiquinone] 1 alpha subcomplex assembly factor 3-like isoform X1 [Malus domestica]
MD13G1026500	[Q]	Secondary metabolites biosynthesis, transport and catabolism	--	--	--	--	Multicopper oxidase LPR2 OS=Arabidopsis thaliana GN=LPR2 PE=2 SV=1	Q	Secondary metabolites biosynthesis, transport and catabolism	PREDICTED: multicopper oxidase LPR2-like [Pyrus x bretschneideri]
MD14G1201800	[H]	Coenzyme transport and metabolism	--	--	[H]	Coenzyme transport and metabolism	--	H	Coenzyme transport and metabolism	PREDICTED: putative lipoate-protein ligase A isoform X1 [Pyrus x bretschneideri]
MD13G1096700	[P]	Inorganic ion transport and metabolism	Cellular Component: plasma membrane (GO:0005886);; Cellular Component: integral component of membrane (GO:0016021);; Biological Process: transmembrane transport (GO:0055085);;	K02575|0|mdm:103452006|high affinity nitrate transporter 2.5; K02575 MFS transporter, NNP family, nitrate/nitrite transporter (A)	--	--	High affinity nitrate transporter 2.5 OS=Arabidopsis thaliana GN=NRT2.5 PE=1 SV=1	P	Inorganic ion transport and metabolism	PREDICTED: high affinity nitrate transporter 2.5 [Malus domestica]
MD15G1133900	[C]	Energy production and conversion	Molecular Function: 3-methyl-2-oxobutanoate dehydrogenase (2-methylpropanoyl-transferring) activity (GO:0003863);; Biological Process: metabolic process (GO:0008152);;	K00166|0|mdm:103415518|2-oxoisovalerate dehydrogenase subunit alpha 2, mitochondrial-like; K00166 2-oxoisovalerate dehydrogenase E1 component alpha subunit [EC:1.2.4.4] (A)	[C]	Energy production and conversion	2-oxoisovalerate dehydrogenase subunit alpha 2, mitochondrial OS=Arabidopsis thaliana GN=At5g09300 PE=1 SV=1	C	Energy production and conversion	PREDICTED: 2-oxoisovalerate dehydrogenase subunit alpha 2, mitochondrial-like [Malus domestica]
MD04G1100500	--	--	Molecular Function: SNAP receptor activity (GO:0005484);; Biological Process: intracellular protein transport (GO:0006886);; Cellular Component: membrane (GO:0016020);;	K08506|0|mdm:103419294|syntaxin-71-like; K08506 syntaxin of plants SYP7 (A)	--	--	Syntaxin-71 OS=Arabidopsis thaliana GN=SYP71 PE=1 SV=1	U	Intracellular trafficking, secretion, and vesicular transport	PREDICTED: syntaxin-71-like [Malus domestica]
MD10G1296100	--	--	--	--	[O]	Posttranslational modification, protein turnover, chaperones	--	S	Function unknown	PREDICTED: uncharacterized protein LOC103446429 [Malus domestica]
MD04G1072900	[P]	Inorganic ion transport and metabolism	Biological Process: superoxide metabolic process (GO:0006801);; Molecular Function: superoxide dismutase copper chaperone activity (GO:0016532);; Biological Process: metal ion transport (GO:0030001);; Biological Process: oxidation-reduction process (GO:0055114);;	K04569|0|mdm:103429462|copper chaperone for superoxide dismutase, chloroplastic/cytosolic-like; K04569 copper chaperone for superoxide dismutase (A)	[P]	Inorganic ion transport and metabolism	Copper chaperone for superoxide dismutase, chloroplastic/cytosolic OS=Arabidopsis thaliana GN=CCS PE=1 SV=1	S	Function unknown	PREDICTED: copper chaperone for superoxide dismutase, chloroplastic/cytosolic-like isoform X1 [Malus domestica]
MD07G1126000	--	--	--	K17362|6.90504e-112|pxb:103932705|acyl-coenzyme A thioesterase 13-like; K17362 acyl-coenzyme A thioesterase 13 [EC:3.1.2.-] (A)	[R]	General function prediction only	--	Q	Secondary metabolites biosynthesis, transport and catabolism	PREDICTED: acyl-coenzyme A thioesterase 13-like [Pyrus x bretschneideri]
MD16G1042400	--	--	--	--	--	--	--	S	Function unknown	PREDICTED: uncharacterized protein LOC103402697 [Malus domestica]
MD06G1045800	--	--	--	--	--	--	HMG-Y-related protein A OS=Zea mays GN=HMGIY2 PE=1 SV=1	S	Function unknown	PREDICTED: putative leucine-rich repeat-containing protein DDB_G0290503 isoform X1 [Pyrus x bretschneideri]
MD13G1243400	--	--	--	--	[T]	Signal transduction mechanisms	Oxysterol-binding protein-related protein 4B OS=Arabidopsis thaliana GN=ORP4B PE=2 SV=2	S	Function unknown	PREDICTED: oxysterol-binding protein-related protein 4B-like [Malus domestica]
MD10G1033400	--	--	--	--	--	--	--	S	Function unknown	PREDICTED: uncharacterized protein LOC108866886 [Pyrus x bretschneideri]
MD09G1209300	[K]	Transcription	Molecular Function: sequence-specific DNA binding transcription factor activity (GO:0003700);; Cellular Component: nucleus (GO:0005634);; Biological Process: regulation of transcription, DNA-templated (GO:0006355);; Biological Process: epidermal cell fate specification (GO:0009957);; Biological Process: negative regulation of trichoblast fate specification (GO:0010062);; Molecular Function: seque…	K09338|0|mdm:103443792|homeobox-leucine zipper protein GLABRA 2-like; K09338 homeobox-leucine zipper protein (A)	--	--	Homeobox-leucine zipper protein GLABRA 2 OS=Arabidopsis thaliana GN=GL2 PE=2 SV=3	K	Transcription	PREDICTED: homeobox-leucine zipper protein GLABRA 2-like [Malus domestica]
MD09G1286100	[I]	Lipid transport and metabolism	--	K01897|0|pxb:103953111|long chain acyl-CoA synthetase 1; K01897 long-chain acyl-CoA synthetase [EC:6.2.1.3] (A)	[I]	Lipid transport and metabolism	Long chain acyl-CoA synthetase 1 OS=Arabidopsis thaliana GN=LACS1 PE=2 SV=1	I	Lipid transport and metabolism	PREDICTED: long chain acyl-CoA synthetase 1 isoform X2 [Pyrus x bretschneideri]
MD15G1329300	--	--	--	--	[S]	Function unknown	Protein CELLULOSE SYNTHASE INTERACTIVE 1 OS=Arabidopsis thaliana GN=CSI1 PE=1 SV=1	S	Function unknown	PREDICTED: uncharacterized protein LOC103959269 isoform X2 [Pyrus x bretschneideri]
MD12G1024000	[R]	General function prediction only	--	--	--	--	--	S	Function unknown	PREDICTED: uncharacterized protein LOC103449455 [Malus domestica]
MD02G1241600	--	--	--	--	--	--	--	S	Function unknown	PREDICTED: uncharacterized protein LOC103408193 isoform X1 [Malus domestica]
MD05G1163400	--	--	--	--	--	--	EPIDERMAL PATTERNING FACTOR-like protein 9 OS=Arabidopsis thaliana GN=EPFL9 PE=1 SV=1	S	Function unknown	PREDICTED: EPIDERMAL PATTERNING FACTOR-like protein 9 isoform X1 [Malus domestica]
MD06G1239200	--	--	--	K11982|0|mdm:103409886|E3 ubiquitin-protein ligase RING1-like; K11982 E3 ubiquitin-protein ligase RNF115/126 [EC:6.3.2.19] (A)	[O]	Posttranslational modification, protein turnover, chaperones	E3 ubiquitin-protein ligase RING1-like OS=Arabidopsis thaliana GN=At3g19950 PE=1 SV=1	O	Posttranslational modification, protein turnover, chaperones	PREDICTED: E3 ubiquitin-protein ligase RING1-like [Malus domestica]
MD10G1062500	[E]	Amino acid transport and metabolism	Biological Process: arginine catabolic process (GO:0006527);; Biological Process: spermidine biosynthetic process (GO:0008295);; Molecular Function: arginine decarboxylase activity (GO:0008792);;	K01583|0|mdm:103422167|arginine decarboxylase-like; K01583 arginine decarboxylase [EC:4.1.1.19] (A)	--	--	Arginine decarboxylase OS=Pisum sativum PE=2 SV=1	E	Amino acid transport and metabolism	PREDICTED: arginine decarboxylase-like [Malus domestica]
MD17G1001400	--	--	--	--	--	--	Squamosa promoter-binding-like protein 13B OS=Arabidopsis thaliana GN=SPL13B PE=3 SV=1	S	Function unknown	PREDICTED: teosinte glume architecture 1-like isoform X2 [Malus domestica]
MD03G1071900	--	--	Biological Process: mitotic cell cycle (GO:0000278);; Biological Process: cytokinesis by cell plate formation (GO:0000911);; Biological Process: DNA methylation (GO:0006306);; Biological Process: methylation-dependent chromatin silencing (GO:0006346);; Biological Process: leaf morphogenesis (GO:0009965);; Cellular Component: actin cytoskeleton (GO:0015629);; Biological Process: RNA interference (…	--	[Z]	Cytoskeleton	Villin-1 OS=Arabidopsis thaliana GN=VLN1 PE=2 SV=2	S	Function unknown	PREDICTED: villin-1 [Malus domestica]
MD07G1294300	[R]	General function prediction only	--	--	[I]	Lipid transport and metabolism	Acyl-CoA-binding domain-containing protein 2 OS=Arabidopsis thaliana GN=ACBP2 PE=1 SV=1	I	Lipid transport and metabolism	PREDICTED: acyl-CoA-binding domain-containing protein 1-like isoform X2 [Malus domestica]
MD05G1128900	--	--	--	K12271|0|pxb:103942461|signal recognition particle 43 kDa protein, chloroplastic; K12271 signal recognition particle 43 kDa protein (A)	[R]	General function prediction only	Signal recognition particle 43 kDa protein, chloroplastic OS=Arabidopsis thaliana GN=CAO PE=1 SV=2	S	Function unknown	PREDICTED: signal recognition particle 43 kDa protein, chloroplastic [Pyrus x bretschneideri]
MD02G1316000	[J]	Translation, ribosomal structure and biogenesis	--	K03232|8.71773e-135|mdm:103413381|elongation factor 1-delta-like; K03232 elongation factor 1-beta (A)	[K]	Transcription	Elongation factor 1-delta 2 OS=Arabidopsis thaliana GN=At2g18110 PE=1 SV=1	J	Translation, ribosomal structure and biogenesis	PREDICTED: elongation factor 1-delta-like [Malus domestica]
MD15G1187200	--	--	--	--	--	--	FRIGIDA-like protein 4a OS=Arabidopsis thaliana GN=FRL4A PE=2 SV=1	S	Function unknown	PREDICTED: FRIGIDA-like protein 4a [Malus domestica]
MD06G1143300	[O]	Posttranslational modification, protein turnover, chaperones	--	--	[O]	Posttranslational modification, protein turnover, chaperones	Katanin p60 ATPase-containing subunit A1 OS=Arabidopsis thaliana GN=AAA1 PE=1 SV=1	O	Posttranslational modification, protein turnover, chaperones	PREDICTED: uncharacterized protein LOC103437552 isoform X3 [Malus domestica]
MD02G1023000	--	--	--	--	--	--	--	S	Function unknown	PREDICTED: uncharacterized protein LOC103447844 [Malus domestica]
MD04G1079000	[U]	Intracellular trafficking, secretion, and vesicular transport	Biological Process: vesicle docking involved in exocytosis (GO:0006904);;	K15292|0|mdm:103408299|SNARE-interacting protein KEULE-like; K15292 syntaxin-binding protein 1 (A)	[U]	Intracellular trafficking, secretion, and vesicular transport	SNARE-interacting protein KEULE OS=Arabidopsis thaliana GN=KEU PE=1 SV=2	U	Intracellular trafficking, secretion, and vesicular transport	PREDICTED: SNARE-interacting protein KEULE-like [Malus domestica]
MD16G1159500	--	--	Biological Process: signal transduction (GO:0007165);; Biological Process: cellular response to light stimulus (GO:0071482);;	--	--	--	Protein DEHYDRATION-INDUCED 19 homolog 4 OS=Arabidopsis thaliana GN=DI19-4 PE=1 SV=1	S	Function unknown	PREDICTED: protein DEHYDRATION-INDUCED 19 homolog 4 [Malus domestica]
MD10G1111800	[Z]	Cytoskeleton	Molecular Function: GTPase activity (GO:0003924);; Molecular Function: structural constituent of cytoskeleton (GO:0005200);; Molecular Function: GTP binding (GO:0005525);; Cellular Component: cytoplasm (GO:0005737);; Cellular Component: microtubule (GO:0005874);; Biological Process: GTP catabolic process (GO:0006184);; Biological Process: microtubule-based process (GO:0007017);; Biological Proces…	K07374|0|mtr:MTR_4g097830|Tubulin alpha-5 chain; K07374 tubulin alpha (A)	[Z]	Cytoskeleton	Tubulin alpha-1 chain OS=Pisum sativum GN=TUBA1 PE=3 SV=1	Z	Cytoskeleton	hypothetical protein B456_009G224800 [Gossypium raimondii]
MD06G1086400	[E]	Amino acid transport and metabolism	Cellular Component: mitochondrion (GO:0005739);; Cellular Component: vacuole (GO:0005773);; Cellular Component: cytosol (GO:0005829);; Cellular Component: plasma membrane (GO:0005886);; Biological Process: proteolysis (GO:0006508);; Molecular Function: metallopeptidase activity (GO:0008237);; Molecular Function: zinc ion binding (GO:0008270);; Cellular Component: chloroplast stroma (GO:0009570);;…	K01256|0|mdm:103454768|puromycin-sensitive aminopeptidase; K01256 aminopeptidase N [EC:3.4.11.2] (A)	[EO]	--	Puromycin-sensitive aminopeptidase OS=Arabidopsis thaliana GN=MPA1 PE=2 SV=1	E	Amino acid transport and metabolism	puromycin-sensitive aminopeptidase isoform X1 [Herrania umbratica]
MD17G1053700	[RTKL]	--	Molecular Function: protein serine/threonine kinase activity (GO:0004674);; Molecular Function: ATP binding (GO:0005524);; Biological Process: protein phosphorylation (GO:0006468);;	K07198|0|mdm:103404469|SNF1-related protein kinase catalytic subunit alpha KIN10; K07198 5'-AMP-activated protein kinase, catalytic alpha subunit [EC:2.7.11.11] (A)	[T]	Signal transduction mechanisms	SNF1-related protein kinase catalytic subunit alpha KIN10 OS=Arabidopsis thaliana GN=KIN10 PE=1 SV=2	T	Signal transduction mechanisms	PREDICTED: SNF1-related protein kinase catalytic subunit alpha KIN10 isoform X1 [Malus domestica]
MD11G1214500	--	--	Molecular Function: Rab GTPase activator activity (GO:0005097);; Biological Process: positive regulation of Rab GTPase activity (GO:0032851);;	K18270|0|mdm:103448388|rab3 GTPase-activating protein catalytic subunit-like; K18270 Rab3 GTPase-activating protein catalytic subunit (A)	[S]	Function unknown	--	S	Function unknown	PREDICTED: rab3 GTPase-activating protein catalytic subunit-like isoform X1 [Malus domestica]
MD12G1216600	--	--	Molecular Function: sequence-specific DNA binding transcription factor activity (GO:0003700);; Biological Process: regulation of transcription, DNA-templated (GO:0006355);; Molecular Function: zinc ion binding (GO:0008270);;	K15601|0|mdm:103450924|uncharacterized LOC103450924; K15601 lysine-specific demethylase 3 [EC:1.14.11.-] (A)	[K]	Transcription	Lysine-specific demethylase JMJ25 OS=Arabidopsis thaliana GN=JMJ25 PE=1 SV=1	S	Function unknown	PREDICTED: LOW QUALITY PROTEIN: lysine-specific demethylase JMJ25 [Pyrus x bretschneideri]
MD03G1045600	[R]	General function prediction only	--	K13342|0|pxb:103967553|peroxisome biogenesis protein 5-like; K13342 peroxin-5 (A)	[R]	General function prediction only	Peroxisome biogenesis protein 5 OS=Arabidopsis thaliana GN=PEX5 PE=1 SV=1	O	Posttranslational modification, protein turnover, chaperones	PREDICTED: peroxisome biogenesis protein 5-like isoform X2 [Pyrus x bretschneideri]
MD10G1045200	--	--	--	--	--	--	Protein ROOT PRIMORDIUM DEFECTIVE 1 OS=Arabidopsis thaliana GN=RPD1 PE=1 SV=1	S	Function unknown	PREDICTED: protein ROOT PRIMORDIUM DEFECTIVE 1-like [Malus domestica]
MD11G1054300	--	--	--	--	--	--	Single myb histone 5 OS=Zea mays GN=SMH5 PE=2 SV=1	K	Transcription	PREDICTED: uncharacterized protein LOC103422645 [Malus domestica]
MD05G1197300	--	--	Molecular Function: nucleic acid binding (GO:0003676);; Molecular Function: zinc ion binding (GO:0008270);;	K12819|0|pxb:103946051|pre-mRNA-splicing factor SLU7-A-like; K12819 pre-mRNA-processing factor SLU7 (A)	[A]	RNA processing and modification	Pre-mRNA-splicing factor SLU7-A OS=Arabidopsis thaliana GN=At1g65660 PE=1 SV=2	A	RNA processing and modification	PREDICTED: pre-mRNA-splicing factor SLU7-A-like [Pyrus x bretschneideri]
MD05G1089900	[R]	General function prediction only	--	K00083|0|mdm:103420099|cinnamyl alcohol dehydrogenase 1; K00083 cinnamyl-alcohol dehydrogenase [EC:1.1.1.195] (A)	[Q]	Secondary metabolites biosynthesis, transport and catabolism	Cinnamyl alcohol dehydrogenase 1 OS=Ocimum basilicum GN=CAD1 PE=1 SV=1	C	Energy production and conversion	PREDICTED: cinnamyl alcohol dehydrogenase 1 [Malus domestica]
MD17G1149700	--	--	--	--	--	--	Cysteine proteinase inhibitor OS=Vigna unguiculata PE=1 SV=1	--	--	PREDICTED: uncharacterized protein LOC103419317 [Malus domestica]
MD15G1412900	[J]	Translation, ribosomal structure and biogenesis	--	K02996|0|mdm:103416334|28S ribosomal protein S9, mitochondrial-like; K02996 small subunit ribosomal protein S9 (A)	[J]	Translation, ribosomal structure and biogenesis	30S ribosomal protein S9, chloroplastic OS=Gracilaria tenuistipitata var. liui GN=rps9 PE=3 SV=1	J	Translation, ribosomal structure and biogenesis	PREDICTED: 28S ribosomal protein S9, mitochondrial-like [Pyrus x bretschneideri]
MD02G1000900	[O]	Posttranslational modification, protein turnover, chaperones	Molecular Function: Rab GDP-dissociation inhibitor activity (GO:0005093);; Biological Process: protein transport (GO:0015031);;	K17255|0|mdm:103417935|guanosine nucleotide diphosphate dissociation inhibitor 2; K17255 Rab GDP dissociation inhibitor (A)	[O]	Posttranslational modification, protein turnover, chaperones	Guanosine nucleotide diphosphate dissociation inhibitor 2 OS=Arabidopsis thaliana GN=GDI2 PE=2 SV=1	O	Posttranslational modification, protein turnover, chaperones	PREDICTED: guanosine nucleotide diphosphate dissociation inhibitor 2 [Malus domestica]
MD15G1178600	--	--	--	K15397|0|pxb:103963004|3-ketoacyl-CoA synthase 11; K15397 3-ketoacyl-CoA synthase [EC:2.3.1.199] (A)	--	--	3-ketoacyl-CoA synthase 11 OS=Arabidopsis thaliana GN=KCS11 PE=1 SV=1	I	Lipid transport and metabolism	PREDICTED: 3-ketoacyl-CoA synthase 11 [Pyrus x bretschneideri]
MD07G1062300	[O]	Posttranslational modification, protein turnover, chaperones	Molecular Function: ATP binding (GO:0005524);; Cellular Component: plasma membrane (GO:0005886);; Biological Process: protein folding (GO:0006457);; Biological Process: response to heat (GO:0009408);; Molecular Function: heat shock protein binding (GO:0031072);; Molecular Function: metal ion binding (GO:0046872);; Molecular Function: unfolded protein binding (GO:0051082);;	K09503|0|mdm:103438785|dnaJ protein homolog; K09503 DnaJ homolog subfamily A member 2 (A)	[O]	Posttranslational modification, protein turnover, chaperones	DnaJ protein homolog OS=Cucumis sativus GN=DNAJ1 PE=2 SV=1	O	Posttranslational modification, protein turnover, chaperones	PREDICTED: dnaJ protein homolog [Malus domestica]
MD05G1192400	--	--	Molecular Function: phosphatidylcholine-sterol O-acyltransferase activity (GO:0004607);; Biological Process: leaf senescence (GO:0010150);; Biological Process: sterol catabolic process (GO:0016127);; Biological Process: sterol esterification (GO:0034434);; Cellular Component: intracellular membrane-bounded organelle (GO:0043231);; Molecular Function: phosphatidylethanolamine-sterol O-acyltransfer…	--	[I]	Lipid transport and metabolism	Phospholipid--sterol O-acyltransferase OS=Arabidopsis thaliana GN=PSAT PE=2 SV=2	S	Function unknown	PREDICTED: phospholipid--sterol O-acyltransferase-like isoform X2 [Malus domestica]
MD10G1192900	--	--	Cellular Component: nucleus (GO:0005634);; Biological Process: regulation of transcription, DNA-templated (GO:0006355);; Biological Process: auxin-activated signaling pathway (GO:0009734);; Molecular Function: protein dimerization activity (GO:0046983);;	K14484|3.16387e-155|mdm:103445717|AUX/IAA7.1; auxin-induced protein AUX28-like; K14484 auxin-responsive protein IAA (A)	--	--	Auxin-induced protein AUX28 OS=Glycine max GN=AUX28 PE=2 SV=1	K	Transcription	PREDICTED: auxin-induced protein AUX28 [Malus domestica]
MD05G1044900	[P]	Inorganic ion transport and metabolism	Molecular Function: copper-exporting ATPase activity (GO:0004008);; Molecular Function: ATP binding (GO:0005524);; Cellular Component: integral component of membrane (GO:0016021);; Molecular Function: metal ion binding (GO:0046872);; Biological Process: copper ion export (GO:0060003);;	K01533|0|mdm:103436541|copper-transporting ATPase PAA1, chloroplastic; K01533 Cu2+-exporting ATPase [EC:3.6.3.4] (A)	[P]	Inorganic ion transport and metabolism	Copper-transporting ATPase PAA1, chloroplastic OS=Arabidopsis thaliana GN=PAA1 PE=2 SV=1	P	Inorganic ion transport and metabolism	PREDICTED: copper-transporting ATPase PAA1, chloroplastic [Malus domestica]
MD12G1209300	--	--	--	--	[K]	Transcription	Methyl-CpG-binding domain-containing protein 9 OS=Arabidopsis thaliana GN=MBD9 PE=2 SV=1	S	Function unknown	PREDICTED: uncharacterized protein LOC103450876 [Malus domestica]
MD13G1045700	--	--	Molecular Function: binding (GO:0005488);;	--	--	--	Transcription factor HHO3 OS=Arabidopsis thaliana GN=HHO3 PE=2 SV=1	K	Transcription	PREDICTED: myb family transcription factor EFM [Pyrus x bretschneideri]
MD05G1341400	[O]	Posttranslational modification, protein turnover, chaperones	Cellular Component: nucleus (GO:0005634);; Cellular Component: cytoplasm (GO:0005737);; Biological Process: cellular protein modification process (GO:0006464);; Biological Process: aging (GO:0007568);; Biological Process: response to salicylic acid (GO:0009751);;	K08770|0|sly:101256039|polyubiquitin; K08770 ubiquitin C (A)	[OR]	--	Polyubiquitin 10 OS=Arabidopsis thaliana GN=UBQ10 PE=2 SV=2	O	Posttranslational modification, protein turnover, chaperones	polyubiquitin [Prunus persica]
MD10G1280800	[R]	General function prediction only	--	K12741|0|mdm:103446324|UBP1-associated protein 2C-like; K12741 heterogeneous nuclear ribonucleoprotein A1/A3 (A)	[R]	General function prediction only	UBP1-associated protein 2C OS=Arabidopsis thaliana GN=UBA2C PE=2 SV=1	S	Function unknown	PREDICTED: UBP1-associated protein 2C [Malus domestica]
MD03G1037300	[Z]	Cytoskeleton	--	K10406|0|mdm:103416754|kinesin KP1; K10406 kinesin family member C2/C3 (A)	[Z]	Cytoskeleton	Kinesin-like protein KIN-14F OS=Arabidopsis thaliana GN=KIN14F PE=1 SV=2	Z	Cytoskeleton	PREDICTED: LOW QUALITY PROTEIN: kinesin KP1 [Malus domestica]
MD15G1339500	[S]	Function unknown	--	--	--	--	Protein LIKE COV 2 OS=Arabidopsis thaliana GN=LCV2 PE=2 SV=1	S	Function unknown	PREDICTED: protein LIKE COV 2-like [Malus domestica]
MD08G1070000	[M]	Cell wall/membrane/envelope biogenesis	--	--	[M]	Cell wall/membrane/envelope biogenesis	Mechanosensitive ion channel protein 10 OS=Arabidopsis thaliana GN=MSL10 PE=1 SV=1	M	Cell wall/membrane/envelope biogenesis	PREDICTED: mechanosensitive ion channel protein 10-like [Malus domestica]
MD01G1164000	[T]	Signal transduction mechanisms	Biological Process: maltose metabolic process (GO:0000023);; Biological Process: starch catabolic process (GO:0005983);; Biological Process: protein dephosphorylation (GO:0006470);; Molecular Function: protein tyrosine/serine/threonine phosphatase activity (GO:0008138);; Cellular Component: chloroplast (GO:0009507);; Biological Process: starch biosynthetic process (GO:0019252);; Biological Proces…	--	[V]	Defense mechanisms	Phosphoglucan phosphatase LSF2, chloroplastic OS=Arabidopsis thaliana GN=LSF2 PE=1 SV=1	T	Signal transduction mechanisms	PREDICTED: phosphoglucan phosphatase LSF2, chloroplastic [Malus domestica]
MD11G1028600	--	--	--	K13100|0|mdm:103447131|pre-mRNA-splicing factor CWC22 homolog; K13100 pre-mRNA-splicing factor CWC22 (A)	[R]	General function prediction only	--	S	Function unknown	PREDICTED: pre-mRNA-splicing factor CWC22 homolog [Malus domestica]
MD08G1010400	[V]	Defense mechanisms	Molecular Function: ATP binding (GO:0005524);; Biological Process: ATP catabolic process (GO:0006200);; Molecular Function: xenobiotic-transporting ATPase activity (GO:0008559);; Molecular Function: peptide-transporting ATPase activity (GO:0015440);; Cellular Component: integral component of membrane (GO:0016021);; Biological Process: transmembrane transport (GO:0055085);;	K05658|0|mdm:103450365|ABC transporter B family member 13-like; K05658 ATP-binding cassette, subfamily B (MDR/TAP), member 1 [EC:3.6.3.44] (A)	[Q]	Secondary metabolites biosynthesis, transport and catabolism	ABC transporter B family member 13 OS=Arabidopsis thaliana GN=ABCB13 PE=3 SV=1	V	Defense mechanisms	PREDICTED: ABC transporter B family member 13-like [Malus domestica]
MD08G1179600	[L]	Replication, recombination and repair	Cellular Component: nucleus (GO:0005634);; Cellular Component: plasmodesma (GO:0009506);;	K10706|3.03945e-31|mdm:103410900|helicase SEN1-like; K10706 senataxin [EC:3.6.4.-] (A)	[A]	RNA processing and modification	Regulator of nonsense transcripts 1 homolog OS=Arabidopsis thaliana GN=UPF1 PE=1 SV=2	L	Replication, recombination and repair	PREDICTED: helicase SEN1-like [Malus domestica]
MD10G1232800	--	--	--	--	--	--	--	S	Function unknown	PREDICTED: uncharacterized protein LOC103420629 isoform X1 [Malus domestica]
MD07G1157800	[R]	General function prediction only	Molecular Function: nucleotide binding (GO:0000166);; Molecular Function: nucleic acid binding (GO:0003676);;	K13161|0|pxb:103956369|heterogeneous nuclear ribonucleoprotein R; K13161 heterogeneous nuclear ribonucleoprotein R (A)	[A]	RNA processing and modification	Polyadenylate-binding protein 5 OS=Arabidopsis thaliana GN=PAB5 PE=1 SV=3	S	Function unknown	PREDICTED: heterogeneous nuclear ribonucleoprotein R isoform X1 [Pyrus x bretschneideri]
MD05G1263900	[J]	Translation, ribosomal structure and biogenesis	Molecular Function: structural constituent of ribosome (GO:0003735);; Cellular Component: ribosome (GO:0005840);; Biological Process: translation (GO:0006412);;	K02938|9.91819e-162|pper:PRUPE_ppa010183mg|hypothetical protein; K02938 large subunit ribosomal protein L8e (A)	[J]	Translation, ribosomal structure and biogenesis	60S ribosomal protein L8-3 OS=Arabidopsis thaliana GN=RPL8C PE=2 SV=2	J	Translation, ribosomal structure and biogenesis	60S ribosomal protein L8-3 [Prunus persica]
MD01G1147200	--	--	--	--	--	--	--	S	Function unknown	PREDICTED: uncharacterized protein LOC103444847 [Malus domestica]
MD09G1019100	[C]	Energy production and conversion	--	K00235|0|mdm:103429000|succinate dehydrogenase [ubiquinone] iron-sulfur subunit 2, mitochondrial-like; K00235 succinate dehydrogenase (ubiquinone) iron-sulfur subunit [EC:1.3.5.1] (A)	[C]	Energy production and conversion	Succinate dehydrogenase [ubiquinone] iron-sulfur subunit 2, mitochondrial OS=Arabidopsis thaliana GN=SDH2-2 PE=1 SV=2	C	Energy production and conversion	PREDICTED: succinate dehydrogenase [ubiquinone] iron-sulfur subunit 2, mitochondrial-like [Malus domestica]
MD01G1060600	--	--	--	--	[K]	Transcription	Mediator of RNA polymerase II transcription subunit 12 OS=Arabidopsis thaliana GN=MED12 PE=1 SV=1	K	Transcription	PREDICTED: mediator of RNA polymerase II transcription subunit 12-like [Pyrus x bretschneideri]
MD11G1258100	--	--	--	--	--	--	--	--	--	PREDICTED: uncharacterized protein LOC103448735 isoform X2 [Malus domestica]
MD08G1128700	--	--	--	K11507|8.75371e-86|pxb:103957547|centromere protein O-like; K11507 centromere protein O (A)	--	--	--	S	Function unknown	PREDICTED: centromere protein O-like isoform X1 [Pyrus x bretschneideri]
MD09G1022200	--	--	--	--	--	--	GDSL esterase/lipase At5g14450 OS=Arabidopsis thaliana GN=At5g14450 PE=2 SV=1	S	Function unknown	PREDICTED: GDSL esterase/lipase At5g14450-like [Malus domestica]
MD17G1276600	--	--	--	--	--	--	TMV resistance protein N OS=Nicotiana glutinosa GN=N PE=1 SV=1	S	Function unknown	PREDICTED: TMV resistance protein N-like [Malus domestica]
MD03G1130200	[J]	Translation, ribosomal structure and biogenesis	--	K02890|7.62343e-139|pxb:103955535|uncharacterized LOC103955535; K02890 large subunit ribosomal protein L22 (A)	[J]	Translation, ribosomal structure and biogenesis	--	J	Translation, ribosomal structure and biogenesis	PREDICTED: uncharacterized protein LOC108171517 [Malus domestica]
MD16G1049500	--	--	--	--	--	--	Protein CHUP1, chloroplastic OS=Arabidopsis thaliana GN=CHUP1 PE=1 SV=1	S	Function unknown	PREDICTED: protein CHUP1, chloroplastic [Pyrus x bretschneideri]
MD07G1257700	--	--	--	K14823|3.90049e-179|mdm:103439664|probable rRNA-processing protein EBP2 homolog; K14823 rRNA-processing protein EBP2 (A)	[A]	RNA processing and modification	Probable rRNA-processing protein EBP2 homolog OS=Arabidopsis thaliana GN=EBP2 PE=1 SV=1	S	Function unknown	PREDICTED: probable rRNA-processing protein EBP2 homolog [Malus domestica]
MD09G1056500	[RTKL]	--	--	K08819|0|mdm:103411208|probable serine/threonine-protein kinase At1g54610; K08819 cyclin-dependent kinase 12/13 [EC:2.7.11.22 2.7.11.23] (A)	[D]	Cell cycle control, cell division, chromosome partitioning	Probable serine/threonine-protein kinase At1g09600 OS=Arabidopsis thaliana GN=At1g09600 PE=3 SV=1	T	Signal transduction mechanisms	PREDICTED: probable serine/threonine-protein kinase At1g54610 isoform X1 [Malus domestica]
MD05G1055500	[R]	General function prediction only	--	K07071|0|pxb:103937082|epimerase family protein SDR39U1-like; K07071 (A)	[F]	Nucleotide transport and metabolism	Epimerase family protein SDR39U1 homolog, chloroplastic OS=Arabidopsis thaliana GN=GC1 PE=2 SV=2	S	Function unknown	PREDICTED: epimerase family protein SDR39U1 homolog, chloroplastic-like [Pyrus x bretschneideri]
MD03G1214700	--	--	--	--	--	--	Chitin-inducible gibberellin-responsive protein 1 OS=Oryza sativa subsp. japonica GN=CIGR1 PE=2 SV=1	K	Transcription	PREDICTED: chitin-inducible gibberellin-responsive protein 1-like [Malus domestica]
MD06G1058200	[M]	Cell wall/membrane/envelope biogenesis	--	--	[G]	Carbohydrate transport and metabolism	Putative glucuronosyltransferase PGSIP8 OS=Arabidopsis thaliana GN=PGSIP8 PE=2 SV=1	O	Posttranslational modification, protein turnover, chaperones	PREDICTED: putative glucuronosyltransferase PGSIP8 [Malus domestica]
MD16G1162200	--	--	Molecular Function: carboxylic ester hydrolase activity (GO:0004091);; Molecular Function: triglyceride lipase activity (GO:0004806);; Biological Process: lipid catabolic process (GO:0016042);;	--	[IOT]	--	--	S	Function unknown	PREDICTED: uncharacterized protein LOC103403714 [Malus domestica]
MD05G1016500	[U]	Intracellular trafficking, secretion, and vesicular transport	Cellular Component: trans-Golgi network (GO:0005802);; Biological Process: protein targeting to membrane (GO:0006612);; Biological Process: protein targeting to vacuole (GO:0006623);; Biological Process: calcium ion transport (GO:0006816);; Biological Process: nucleotide transport (GO:0006862);; Biological Process: cellular zinc ion homeostasis (GO:0006882);; Biological Process: ER to Golgi vesic…	K12479|0|mdm:103437229|vacuolar protein sorting-associated protein 45 homolog; K12479 vacuolar protein sorting-associated protein 45 (A)	[U]	Intracellular trafficking, secretion, and vesicular transport	Vacuolar protein sorting-associated protein 45 homolog OS=Arabidopsis thaliana GN=VPS45 PE=1 SV=2	U	Intracellular trafficking, secretion, and vesicular transport	PREDICTED: vacuolar protein sorting-associated protein 45 homolog isoform X1 [Malus domestica]
MD16G1269000	--	--	--	--	[T]	Signal transduction mechanisms	Vacuolar protein sorting-associated protein 55 homolog OS=Arabidopsis thaliana GN=At1g32410 PE=2 SV=1	U	Intracellular trafficking, secretion, and vesicular transport	PREDICTED: vacuolar protein sorting-associated protein 55 homolog [Malus domestica]
MD15G1063600	[S]	Function unknown	Cellular Component: membrane (GO:0016020);;	--	[R]	General function prediction only	CSC1-like protein RXW8 OS=Arabidopsis thaliana GN=RXW8 PE=2 SV=1	S	Function unknown	PREDICTED: CSC1-like protein RXW8 isoform X2 [Pyrus x bretschneideri]
Apple_newGene_32886	--	--	--	--	--	--	Putative ribonuclease H protein At1g65750 GN=At1g65750 OS=Arabidopsis thaliana (Mouse-ear cress) PE=3 SV=1	R	General function prediction only	PREDICTED: uncharacterized protein LOC103437216 isoform X1 [Malus domestica]
MD03G1174600	--	--	--	K08064|0|mdm:103431670|nuclear transcription factor Y subunit A-1-like; K08064 nuclear transcription factor Y, alpha (A)	[K]	Transcription	Nuclear transcription factor Y subunit A-1 OS=Arabidopsis thaliana GN=NFYA1 PE=2 SV=1	K	Transcription	PREDICTED: nuclear transcription factor Y subunit A-1-like isoform X1 [Malus domestica]
MD14G1152400	--	--	--	K17046|0|pxb:103949978|protein DEK; K17046 protein DEK (A)	[B]	Chromatin structure and dynamics	--	S	Function unknown	PREDICTED: protein DEK isoform X2 [Pyrus x bretschneideri]
MD01G1116700	[RTKL]	--	--	--	--	--	Wall-associated receptor kinase 5 OS=Arabidopsis thaliana GN=WAK5 PE=2 SV=1	T	Signal transduction mechanisms	PREDICTED: uncharacterized protein LOC103936744 [Pyrus x bretschneideri]
MD05G1085000	[A]	RNA processing and modification	--	K10661|0|mdm:103428221|probable E3 ubiquitin ligase SUD1; K10661 E3 ubiquitin-protein ligase MARCH6 [EC:6.3.2.19] (A)	[A]	RNA processing and modification	Probable E3 ubiquitin ligase SUD1 OS=Arabidopsis thaliana GN=SUD1 PE=1 SV=1	O	Posttranslational modification, protein turnover, chaperones	PREDICTED: probable E3 ubiquitin ligase SUD1 [Malus domestica]
MD17G1057400	[R]	General function prediction only	Molecular Function: metalloendopeptidase activity (GO:0004222);; Cellular Component: cell wall (GO:0005618);; Cellular Component: nucleolus (GO:0005730);; Cellular Component: mitochondrial outer membrane (GO:0005741);; Cellular Component: mitochondrial respiratory chain complex III (GO:0005750);; Cellular Component: mitochondrial intermembrane space (GO:0005758);; Cellular Component: mitochondria…	K17732|0|pxb:103950992|probable mitochondrial-processing peptidase subunit beta; K17732 mitochondrial-processing peptidase subunit beta [EC:3.4.24.64] (A)	[O]	Posttranslational modification, protein turnover, chaperones	Probable mitochondrial-processing peptidase subunit beta, mitochondrial OS=Arabidopsis thaliana GN=At3g02090 PE=1 SV=2	O	Posttranslational modification, protein turnover, chaperones	PREDICTED: probable mitochondrial-processing peptidase subunit beta, mitochondrial isoform X1 [Pyrus x bretschneideri]
MD06G1082000	--	--	Molecular Function: protein kinase activity (GO:0004672);; Molecular Function: ATP binding (GO:0005524);; Biological Process: protein phosphorylation (GO:0006468);;	K14500|0|pper:PRUPE_ppa004862mg|hypothetical protein; K14500 BR-signaling kinase [EC:2.7.11.1] (A)	--	--	Probable serine/threonine-protein kinase At5g41260 OS=Arabidopsis thaliana GN=At5g41260 PE=1 SV=1	T	Signal transduction mechanisms	probable serine/threonine-protein kinase At5g41260 [Prunus persica]
MD15G1364900	[L]	Replication, recombination and repair	--	K10706|0|mdm:103439081|uncharacterized LOC103439081; K10706 senataxin [EC:3.6.4.-] (A)	[A]	RNA processing and modification	Probable helicase MAGATAMA 3 OS=Arabidopsis thaliana GN=MAA3 PE=2 SV=1	L	Replication, recombination and repair	PREDICTED: uncharacterized protein LOC103439081 [Malus domestica]
MD12G1193700	[O]	Posttranslational modification, protein turnover, chaperones	Molecular Function: zinc ion binding (GO:0008270);;	--	[S]	Function unknown	ERAD-associated E3 ubiquitin-protein ligase HRD1B OS=Arabidopsis thaliana GN=HRD1B PE=2 SV=1	S	Function unknown	PREDICTED: RING finger and transmembrane domain-containing protein 2-like [Pyrus x bretschneideri]
MD11G1110600	[R]	General function prediction only	--	--	--	--	Putative E3 ubiquitin-protein ligase XBAT31 OS=Arabidopsis thaliana GN=XBAT31 PE=2 SV=1	S	Function unknown	PREDICTED: putative E3 ubiquitin-protein ligase XBAT31 [Malus domestica]
MD13G1148300	--	--	Biological Process: metabolic process (GO:0008152);; Molecular Function: glycopeptide alpha-N-acetylgalactosaminidase activity (GO:0033926);;	--	--	--	Alkaline/neutral invertase C, mitochondrial OS=Arabidopsis thaliana GN=INVC PE=1 SV=1	S	Function unknown	PREDICTED: alkaline/neutral invertase A, mitochondrial [Pyrus x bretschneideri]
MD08G1128400	--	--	--	--	[O]	Posttranslational modification, protein turnover, chaperones	Probable E3 ubiquitin-protein ligase HIP1 OS=Oryza sativa subsp. japonica GN=HIP1 PE=1 SV=2	O	Posttranslational modification, protein turnover, chaperones	PREDICTED: E3 ubiquitin-protein ligase RNF6-like [Malus domestica]
MD15G1336300	--	--	--	--	--	--	TSL-kinase interacting protein 1 OS=Arabidopsis thaliana GN=TKI1 PE=1 SV=2	S	Function unknown	PREDICTED: TSL-kinase interacting protein 1 isoform X1 [Malus domestica]
MD03G1292300	[C]	Energy production and conversion	Molecular Function: fumarate hydratase activity (GO:0004333);; Cellular Component: mitochondrion (GO:0005739);; Cellular Component: cytosol (GO:0005829);; Biological Process: tricarboxylic acid cycle (GO:0006099);; Biological Process: fumarate metabolic process (GO:0006106);; Biological Process: response to oxidative stress (GO:0006979);; Biological Process: response to salt stress (GO:0009651);;…	K01679|0|mdm:103408134|fumarate hydratase 1, mitochondrial; K01679 fumarate hydratase, class II [EC:4.2.1.2] (A)	[C]	Energy production and conversion	Fumarate hydratase 1, mitochondrial OS=Arabidopsis thaliana GN=FUM1 PE=1 SV=2	C	Energy production and conversion	PREDICTED: fumarate hydratase 1, mitochondrial [Malus domestica]
MD00G1107800	--	--	Molecular Function: DNA binding (GO:0003677);; Biological Process: rRNA processing (GO:0006364);; Biological Process: unsaturated fatty acid biosynthetic process (GO:0006636);; Biological Process: response to light stimulus (GO:0009416);; Cellular Component: chloroplast thylakoid membrane (GO:0009535);; Cellular Component: chloroplast inner membrane (GO:0009706);; Biological Process: thylakoid me…	K04035|0|pxb:103938880|magnesium-protoporphyrin IX monomethyl ester [oxidative] cyclase, chloroplastic-like; K04035 magnesium-protoporphyrin IX monomethyl ester (oxidative) cyclase [EC:1.14.13.81] (A)	--	--	Magnesium-protoporphyrin IX monomethyl ester [oxidative] cyclase, chloroplastic OS=Arabidopsis thaliana GN=CRD1 PE=1 SV=2	H	Coenzyme transport and metabolism	PREDICTED: magnesium-protoporphyrin IX monomethyl ester [oxidative] cyclase, chloroplastic-like isoform X1 [Pyrus x bretschneideri]
MD16G1121200	--	--	--	--	[S]	Function unknown	Calmodulin-binding transcription activator 4 OS=Arabidopsis thaliana GN=CMTA4 PE=1 SV=1	K	Transcription	PREDICTED: calmodulin-binding transcription activator 4 [Pyrus x bretschneideri]
MD05G1001600	--	--	--	K01528|0|mdm:103455061|dynamin-2A-like; K01528 dynamin GTPase [EC:3.6.5.5] (A)	[UR]	--	Dynamin-2B OS=Arabidopsis thaliana GN=DRP2B PE=1 SV=2	S	Function unknown	PREDICTED: dynamin-2A-like [Malus domestica]
MD08G1242000	[J]	Translation, ribosomal structure and biogenesis	Molecular Function: structural constituent of ribosome (GO:0003735);; Cellular Component: ribosome (GO:0005840);; Biological Process: translation (GO:0006412);;	K02925|0|mdm:103441961|60S ribosomal protein L3-2-like; K02925 large subunit ribosomal protein L3e (A)	[J]	Translation, ribosomal structure and biogenesis	60S ribosomal protein L3-2 OS=Arabidopsis thaliana GN=ARP2 PE=2 SV=4	J	Translation, ribosomal structure and biogenesis	PREDICTED: 60S ribosomal protein L3-2-like [Malus domestica]
MD14G1242400	--	--	--	K02325|0|pxb:103946881|DNA polymerase epsilon subunit 2; K02325 DNA polymerase epsilon subunit 2 [EC:2.7.7.7] (A)	[L]	Replication, recombination and repair	DNA polymerase epsilon subunit B OS=Arabidopsis thaliana GN=DPB2 PE=1 SV=1	L	Replication, recombination and repair	PREDICTED: DNA polymerase epsilon subunit B [Pyrus x bretschneideri]
MD11G1082400	[R]	General function prediction only	--	--	[K]	Transcription	Serine/arginine-rich splicing factor SR45a OS=Arabidopsis thaliana GN=SR45A PE=1 SV=1	S	Function unknown	serine/arginine-rich splicing factor SR45a isoform X2 [Prunus persica]
MD13G1093500	--	--	--	--	--	--	--	S	Function unknown	uncharacterized protein LOC110753244 isoform X1 [Prunus avium]
MD09G1234500	[O]	Posttranslational modification, protein turnover, chaperones	Molecular Function: metalloendopeptidase activity (GO:0004222);; Molecular Function: ATP binding (GO:0005524);; Biological Process: proteolysis (GO:0006508);; Cellular Component: membrane (GO:0016020);; Molecular Function: nucleoside-triphosphatase activity (GO:0017111);; Biological Process: protein catabolic process (GO:0030163);;	K03798|0|pxb:103955130|ATP-dependent zinc metalloprotease FTSH 2, chloroplastic; K03798 cell division protease FtsH [EC:3.4.24.-] (A)	[O]	Posttranslational modification, protein turnover, chaperones	ATP-dependent zinc metalloprotease FTSH 2, chloroplastic OS=Arabidopsis thaliana GN=FTSH2 PE=1 SV=1	O	Posttranslational modification, protein turnover, chaperones	PREDICTED: ATP-dependent zinc metalloprotease FTSH 2, chloroplastic [Pyrus x bretschneideri]
MD10G1039200	--	--	--	--	--	--	TMV resistance protein N OS=Nicotiana glutinosa GN=N PE=1 SV=1	S	Function unknown	PREDICTED: TMV resistance protein N-like [Pyrus x bretschneideri]
MD05G1177500	--	--	Cellular Component: thylakoid (GO:0009579);; Cellular Component: chloroplast part (GO:0044434);;	--	--	--	Uncharacterized protein At4g13200, chloroplastic OS=Arabidopsis thaliana GN=At4g13200 PE=2 SV=2	S	Function unknown	PREDICTED: uncharacterized protein At4g13200, chloroplastic [Malus domestica]
MD15G1162500	[R]	General function prediction only	Molecular Function: zinc ion binding (GO:0008270);;	--	[R]	General function prediction only	Protein S-acyltransferase 24 OS=Arabidopsis thaliana GN=PAT24 PE=2 SV=1	S	Function unknown	PREDICTED: protein S-acyltransferase 24-like [Malus domestica]
MD15G1098200	[U]	Intracellular trafficking, secretion, and vesicular transport	Biological Process: intracellular protein transport (GO:0006886);; Molecular Function: protein transporter activity (GO:0008565);; Biological Process: vesicle-mediated transport (GO:0016192);; Cellular Component: clathrin adaptor complex (GO:0030131);;	--	[U]	Intracellular trafficking, secretion, and vesicular transport	Beta-adaptin-like protein A OS=Arabidopsis thaliana GN=BETAA-AD PE=1 SV=1	U	Intracellular trafficking, secretion, and vesicular transport	PREDICTED: beta-adaptin-like protein A [Malus domestica]
MD06G1023400	[S]	Function unknown	Cellular Component: membrane (GO:0016020);;	--	[R]	General function prediction only	CSC1-like protein At1g32090 OS=Arabidopsis thaliana GN=At1g32090 PE=1 SV=1	S	Function unknown	PREDICTED: CSC1-like protein At1g32090 [Malus domestica]
MD05G1250500	--	--	--	K05750|0|mdm:103435289|protein NAP1; K05750 NCK-associated protein 1 (A)	[R]	General function prediction only	Protein NAP1 OS=Arabidopsis thaliana GN=NAP1 PE=1 SV=2	S	Function unknown	PREDICTED: protein NAP1 [Malus domestica]
MD16G1026800	[O]	Posttranslational modification, protein turnover, chaperones	--	K04078|8.46058e-63|pxb:103943018|10 kDa chaperonin-like; K04078 chaperonin GroES (A)	[O]	Posttranslational modification, protein turnover, chaperones	10 kDa chaperonin, mitochondrial OS=Arabidopsis thaliana GN=CPN10 PE=1 SV=1	O	Posttranslational modification, protein turnover, chaperones	PREDICTED: 10 kDa chaperonin-like [Malus domestica]
MD05G1128600	[RTKL]	--	Molecular Function: nucleotide binding (GO:0000166);; Molecular Function: protein kinase activity (GO:0004672);;	--	--	--	Receptor-like cytosolic serine/threonine-protein kinase RBK1 OS=Arabidopsis thaliana GN=RBK1 PE=1 SV=1	T	Signal transduction mechanisms	PREDICTED: PTI1-like tyrosine-protein kinase 1 [Malus domestica]
MD12G1040200	[RTKL]	--	Biological Process: activation of MAPKK activity (GO:0000186);; Molecular Function: MAP kinase kinase kinase activity (GO:0004709);; Molecular Function: ATP binding (GO:0005524);; Cellular Component: integral component of membrane (GO:0016021);;	--	--	--	Receptor protein kinase TMK1 OS=Arabidopsis thaliana GN=TMK1 PE=1 SV=1	T	Signal transduction mechanisms	PREDICTED: receptor protein kinase TMK1-like [Malus domestica]
MD10G1269300	--	--	Cellular Component: plasma membrane (GO:0005886);; Biological Process: carbohydrate transport (GO:0008643);; Cellular Component: integral component of membrane (GO:0016021);;	K15382|2.02984e-157|mdm:103429662|bidirectional sugar transporter SWEET2a-like; K15382 solute carrier family 50 (sugar transporter) (A)	[R]	General function prediction only	Bidirectional sugar transporter SWEET2a OS=Oryza sativa subsp. japonica GN=SWEET2A PE=2 SV=1	U	Intracellular trafficking, secretion, and vesicular transport	PREDICTED: bidirectional sugar transporter SWEET2a-like [Malus domestica]
MD15G1155400	--	--	Cellular Component: integral component of membrane (GO:0016021);; Biological Process: vesicle-mediated transport (GO:0016192);;	K08516|4.41673e-148|pxb:103949105|VAMP-like protein YKT61; K08516 synaptobrevin homolog YKT6 (A)	[U]	Intracellular trafficking, secretion, and vesicular transport	VAMP-like protein YKT61 OS=Arabidopsis thaliana GN=YKT61 PE=2 SV=1	U	Intracellular trafficking, secretion, and vesicular transport	PREDICTED: VAMP-like protein YKT61 [Malus domestica]
MD01G1207500	[R]	General function prediction only	--	--	--	--	Polyadenylate-binding protein 6 OS=Arabidopsis thaliana GN=PAB6 PE=2 SV=1	S	Function unknown	PREDICTED: probable RNA-binding protein 18 [Malus domestica]
MD10G1292700	--	--	--	K14409|0|mdm:103446392|protein SMG7L (A)	[A]	RNA processing and modification	Protein SMG7L OS=Arabidopsis thaliana GN=SMG7L PE=2 SV=1	S	Function unknown	PREDICTED: protein SMG7L [Malus domestica]
MD14G1044900	--	--	--	--	--	--	--	S	Function unknown	PREDICTED: protein downstream neighbor of Son-like isoform X1 [Malus domestica]
MD03G1150700	[R]	General function prediction only	Biological Process: nitrogen compound metabolic process (GO:0006807);; Molecular Function: hydrolase activity, acting on carbon-nitrogen (but not peptide) bonds (GO:0016810);;	K13035|0|mdm:103424813|bifunctional nitrilase/nitrile hydratase NIT4B; K13035 beta-cyano-L-alanine hydratase/nitrilase [EC:3.5.5.4 4.2.1.65] (A)	[E]	Amino acid transport and metabolism	Bifunctional nitrilase/nitrile hydratase NIT4B OS=Nicotiana tabacum GN=NIT4B PE=2 SV=1	S	Function unknown	PREDICTED: bifunctional nitrilase/nitrile hydratase NIT4B [Malus domestica]
MD16G1094400	[OC]	--	Biological Process: cell redox homeostasis (GO:0045454);; Molecular Function: protein-disulfide reductase activity (GO:0047134);; Biological Process: oxidation-reduction process (GO:0055114);;	K17609|0|mdm:103403022|probable nucleoredoxin 1; K17609 nucleoredoxin [EC:1.8.1.8] (A)	[R]	General function prediction only	Probable nucleoredoxin 1 OS=Arabidopsis thaliana GN=At1g60420 PE=1 SV=1	O	Posttranslational modification, protein turnover, chaperones	PREDICTED: probable nucleoredoxin 1 [Malus domestica]
MD09G1064500	--	--	--	--	--	--	F-box protein At5g39250 OS=Arabidopsis thaliana GN=At5g39250 PE=2 SV=1	S	Function unknown	PREDICTED: F-box protein At5g39250-like [Pyrus x bretschneideri]
MD11G1302000	--	--	--	--	--	--	Homeobox protein LUMINIDEPENDENS OS=Arabidopsis thaliana GN=LD PE=1 SV=2	K	Transcription	PREDICTED: homeobox protein LUMINIDEPENDENS-like isoform X1 [Malus domestica]
MD12G1159600	[I]	Lipid transport and metabolism	Molecular Function: acetyl-CoA carboxylase activity (GO:0003989);; Biological Process: fatty acid biosynthetic process (GO:0006633);; Cellular Component: acetyl-CoA carboxylase complex (GO:0009317);; Molecular Function: transferase activity (GO:0016740);;	K01962|0|mdm:103450531|acetyl-coenzyme A carboxylase carboxyl transferase subunit alpha, chloroplastic-like; K01962 acetyl-CoA carboxylase carboxyl transferase subunit alpha [EC:6.4.1.2] (A)	--	--	Acetyl-coenzyme A carboxylase carboxyl transferase subunit alpha, chloroplastic OS=Arabidopsis thaliana GN=CAC3 PE=1 SV=1	I	Lipid transport and metabolism	PREDICTED: acetyl-coenzyme A carboxylase carboxyl transferase subunit alpha, chloroplastic-like [Malus domestica]
MD01G1206800	--	--	Biological Process: regulation of transcription, DNA-templated (GO:0006355);;	--	--	--	Scarecrow-like protein 8 OS=Arabidopsis thaliana GN=SCL8 PE=2 SV=1	S	Function unknown	PREDICTED: scarecrow-like protein 8 [Malus domestica]
MD01G1065800	[KL]	--	Molecular Function: DNA binding (GO:0003677);; Molecular Function: chromatin binding (GO:0003682);; Molecular Function: helicase activity (GO:0004386);; Molecular Function: ATP binding (GO:0005524);; Cellular Component: nucleus (GO:0005634);; Cellular Component: cytosol (GO:0005829);; Biological Process: regulation of transcription, DNA-templated (GO:0006355);; Biological Process: organ boundary …	K11647|0|mdm:103405393|ATP-dependent helicase BRM; K11647 SWI/SNF-related matrix-associated actin-dependent regulator of chromatin subfamily A member 2/4 [EC:3.6.4.-] (A)	[BK]	--	ATP-dependent helicase BRM OS=Arabidopsis thaliana GN=BRM PE=1 SV=1	L	Replication, recombination and repair	PREDICTED: ATP-dependent helicase BRM isoform X1 [Malus domestica]
MD08G1059200	--	--	Molecular Function: sequence-specific DNA binding transcription factor activity (GO:0003700);; Cellular Component: nucleus (GO:0005634);; Biological Process: regulation of transcription, DNA-templated (GO:0006355);; Molecular Function: metal ion binding (GO:0046872);;	--	--	--	Zinc finger protein 3 OS=Arabidopsis thaliana GN=ZFP3 PE=2 SV=1	S	Function unknown	PREDICTED: zinc finger protein 1-like [Malus domestica]
MD11G1183500	[E]	Amino acid transport and metabolism	Molecular Function: hydroxymethylglutaryl-CoA lyase activity (GO:0004419);; Biological Process: metabolic process (GO:0008152);;	K01640|0|mdm:103448176|hydroxymethylglutaryl-CoA lyase, mitochondrial; K01640 hydroxymethylglutaryl-CoA lyase [EC:4.1.3.4] (A)	[CE]	--	Hydroxymethylglutaryl-CoA lyase, mitochondrial OS=Arabidopsis thaliana GN=HMGCL PE=1 SV=2	E	Amino acid transport and metabolism	PREDICTED: hydroxymethylglutaryl-CoA lyase, mitochondrial [Malus domestica]
MD13G1129600	--	--	--	--	--	--	--	S	Function unknown	PREDICTED: uncharacterized protein LOC103452483 isoform X1 [Malus domestica]
MD06G1001600	--	--	--	--	--	--	Proton pump-interactor 1 OS=Arabidopsis thaliana GN=PPI1 PE=1 SV=2	S	Function unknown	PREDICTED: titin homolog [Malus domestica]
MD11G1189800	[J]	Translation, ribosomal structure and biogenesis	--	K03678|0|mdm:103422431|protein RRP45A-like; K03678 exosome complex component RRP45 (A)	[J]	Translation, ribosomal structure and biogenesis	Exosome complex component RRP45B OS=Arabidopsis thaliana GN=RRP45B PE=2 SV=1	J	Translation, ribosomal structure and biogenesis	PREDICTED: exosome complex component RRP45A-like isoform X2 [Malus domestica]
MD15G1096900	[E]	Amino acid transport and metabolism	--	K14454|0|mdm:103424713|aspartate aminotransferase, cytoplasmic; K14454 aspartate aminotransferase, cytoplasmic [EC:2.6.1.1] (A)	[E]	Amino acid transport and metabolism	Aspartate aminotransferase 3, chloroplastic OS=Arabidopsis thaliana GN=ASP3 PE=1 SV=1	E	Amino acid transport and metabolism	PREDICTED: aspartate aminotransferase, cytoplasmic [Malus domestica]
MD13G1236100	--	--	--	--	--	--	--	S	Function unknown	PREDICTED: uncharacterized protein LOC103933773 [Pyrus x bretschneideri]
MD02G1022200	[RTKL]	--	Molecular Function: protein kinase activity (GO:0004672);; Biological Process: signal transduction (GO:0007165);; Biological Process: cellular metabolic process (GO:0044237);; Biological Process: innate immune response (GO:0045087);; Biological Process: cellular response to organic substance (GO:0071310);; Biological Process: organic substance metabolic process (GO:0071704);;	--	[T]	Signal transduction mechanisms	Calmodulin-binding receptor-like cytoplasmic kinase 3 OS=Arabidopsis thaliana GN=CRCK3 PE=2 SV=1	T	Signal transduction mechanisms	PREDICTED: calmodulin-binding receptor-like cytoplasmic kinase 3 [Malus domestica]
MD06G1226900	[R]	General function prediction only	--	--	[R]	General function prediction only	Protein C2-DOMAIN ABA-RELATED 4 OS=Arabidopsis thaliana GN=CAR4 PE=1 SV=1	S	Function unknown	PREDICTED: protein C2-DOMAIN ABA-RELATED 4-like [Pyrus x bretschneideri]
MD16G1117600	--	--	--	--	[R]	General function prediction only	F-box/kelch-repeat protein At1g67480 OS=Arabidopsis thaliana GN=At1g67480 PE=2 SV=1	S	Function unknown	PREDICTED: F-box/kelch-repeat protein At1g67480 [Malus domestica]
MD15G1106500	--	--	--	--	--	--	--	S	Function unknown	PREDICTED: uncharacterized protein LOC103957536 isoform X2 [Pyrus x bretschneideri]
MD07G1005900	[J]	Translation, ribosomal structure and biogenesis	Molecular Function: translation elongation factor activity (GO:0003746);; Cellular Component: eukaryotic translation elongation factor 1 complex (GO:0005853);; Biological Process: translational elongation (GO:0006414);;	K03232|2.39951e-134|mdm:103420440|elongation factor 1-delta-like; K03232 elongation factor 1-beta (A)	[K]	Transcription	Elongation factor 1-delta 2 OS=Arabidopsis thaliana GN=At2g18110 PE=1 SV=1	J	Translation, ribosomal structure and biogenesis	PREDICTED: elongation factor 1-delta-like [Malus domestica]
MD04G1052000	--	--	Molecular Function: sequence-specific DNA binding transcription factor activity (GO:0003700);; Biological Process: regulation of transcription, DNA-templated (GO:0006355);; Molecular Function: zinc ion binding (GO:0008270);; Molecular Function: sequence-specific DNA binding (GO:0043565);;	--	[K]	Transcription	GATA transcription factor 26 OS=Arabidopsis thaliana GN=GATA26 PE=2 SV=1	K	Transcription	PREDICTED: GATA transcription factor 26-like [Malus domestica]
MD09G1085700	[R]	General function prediction only	--	--	[T]	Signal transduction mechanisms	RHOMBOID-like protein 9, chloroplastic OS=Arabidopsis thaliana GN=RBL9 PE=2 SV=1	S	Function unknown	PREDICTED: RHOMBOID-like protein 9, chloroplastic isoform X2 [Malus domestica]
MD17G1277500	--	--	Molecular Function: carboxypeptidase activity (GO:0004180);; Cellular Component: vacuolar membrane (GO:0005774);; Cellular Component: endoplasmic reticulum (GO:0005783);; Cellular Component: Golgi apparatus (GO:0005794);; Biological Process: protein glycosylation (GO:0006486);; Biological Process: N-terminal protein myristoylation (GO:0006499);; Cellular Component: plant-type cell wall (GO:000950…	--	[O]	Posttranslational modification, protein turnover, chaperones	--	S	Function unknown	PREDICTED: nodal modulator 1 [Malus domestica]
MD14G1192000	--	--	--	--	--	--	Ubiquitin carboxyl-terminal hydrolase 23 OS=Arabidopsis thaliana GN=UBP23 PE=2 SV=2	O	Posttranslational modification, protein turnover, chaperones	PREDICTED: uncharacterized protein LOC103935400 isoform X2 [Pyrus x bretschneideri]
MD04G1217700	[RTKL]	--	--	--	[T]	Signal transduction mechanisms	Serine/threonine-protein kinase EDR1 OS=Arabidopsis thaliana GN=EDR1 PE=1 SV=1	T	Signal transduction mechanisms	PREDICTED: serine/threonine-protein kinase EDR1-like, partial [Malus domestica]
MD07G1301800	--	--	Molecular Function: DNA binding (GO:0003677);; Biological Process: regulation of transcription, DNA-templated (GO:0006355);;	--	--	--	NAC domain-containing protein 91 OS=Arabidopsis thaliana GN=NAC091 PE=1 SV=1	S	Function unknown	uncharacterized LOC103439966 [Malus domestica]
MD03G1217200	[O]	Posttranslational modification, protein turnover, chaperones	--	K11836|0|mdm:103429936|ubiquitin carboxyl-terminal hydrolase 14-like; K11836 ubiquitin carboxyl-terminal hydrolase 5/13 [EC:3.4.19.12] (A)	[O]	Posttranslational modification, protein turnover, chaperones	Ubiquitin carboxyl-terminal hydrolase 14 OS=Arabidopsis thaliana GN=UBP14 PE=1 SV=1	O	Posttranslational modification, protein turnover, chaperones	PREDICTED: ubiquitin carboxyl-terminal hydrolase 14-like [Malus domestica]
MD15G1090600	--	--	--	K14484|0|mdm:103415456|auxin-responsive protein IAA2-like; K14484 auxin-responsive protein IAA (A)	--	--	Auxin-responsive protein IAA26 OS=Arabidopsis thaliana GN=IAA26 PE=1 SV=2	--	--	auxin [Malus zumi]
MD01G1083400	--	--	Molecular Function: DNA binding (GO:0003677);; Cellular Component: nucleus (GO:0005634);; Biological Process: regulation of transcription, DNA-templated (GO:0006355);; Biological Process: auxin-activated signaling pathway (GO:0009734);; Molecular Function: protein dimerization activity (GO:0046983);;	K14486|0|mdm:103416152|auxin response factor 18-like; K14486 auxin response factor (A)	--	--	Auxin response factor 18 OS=Arabidopsis thaliana GN=ARF18 PE=2 SV=1	K	Transcription	PREDICTED: auxin response factor 18-like isoform X1 [Malus domestica]
MD09G1046500	--	--	Molecular Function: ATP binding (GO:0005524);;	K14399|0|mdm:103421492|protein CLP1 homolog; K14399 polyribonucleotide 5'-hydroxyl-kinase [EC:2.7.1.78] (A)	[A]	RNA processing and modification	Protein CLP1 homolog OS=Arabidopsis thaliana GN=CLPS3 PE=1 SV=1	A	RNA processing and modification	PREDICTED: protein CLP1 homolog isoform X1 [Malus domestica]
MD10G1334300	[RTKL]	--	--	--	--	--	Probable LRR receptor-like serine/threonine-protein kinase At1g53430 OS=Arabidopsis thaliana GN=At1g53430 PE=1 SV=1	T	Signal transduction mechanisms	PREDICTED: probable LRR receptor-like serine/threonine-protein kinase At1g53440 isoform X2 [Malus domestica]
MD16G1248700	--	--	Molecular Function: sequence-specific DNA binding transcription factor activity (GO:0003700);; Cellular Component: nucleus (GO:0005634);; Biological Process: regulation of transcription, DNA-templated (GO:0006355);; Molecular Function: zinc ion binding (GO:0008270);; Molecular Function: sequence-specific DNA binding (GO:0043565);;	--	[R]	General function prediction only	Pathogenesis-related homeodomain protein OS=Arabidopsis thaliana GN=PRH PE=2 SV=1	S	Function unknown	PREDICTED: pathogenesis-related homeodomain protein-like [Malus domestica]
MD15G1164900	[M]	Cell wall/membrane/envelope biogenesis	Biological Process: sucrose biosynthetic process (GO:0005986);; Molecular Function: sucrose-phosphate synthase activity (GO:0046524);;	K00696|0|mdm:103400066|probable sucrose-phosphate synthase 1; K00696 sucrose-phosphate synthase [EC:2.4.1.14] (A)	[M]	Cell wall/membrane/envelope biogenesis	Probable sucrose-phosphate synthase 1 OS=Citrus unshiu GN=SPS1 PE=2 SV=1	M	Cell wall/membrane/envelope biogenesis	PREDICTED: probable sucrose-phosphate synthase 1 [Malus domestica]
MD15G1223900	--	--	--	K13109|0|mdm:103400894|protein Red-like; K13109 IK cytokine (A)	[T]	Signal transduction mechanisms	Suppressor of mec-8 and unc-52 protein homolog 2 OS=Arabidopsis thaliana GN=SMU2 PE=1 SV=1	S	Function unknown	PREDICTED: suppressor of mec-8 and unc-52 protein homolog 2-like [Malus domestica]
MD11G1048100	[T]	Signal transduction mechanisms	--	--	[T]	Signal transduction mechanisms	Probable protein phosphatase 2C 18 OS=Arabidopsis thaliana GN=At1g79630 PE=2 SV=1	T	Signal transduction mechanisms	PREDICTED: probable protein phosphatase 2C 6 [Malus domestica]
MD07G1070900	--	--	--	--	--	--	--	S	Function unknown	PREDICTED: uncharacterized protein At2g27730, mitochondrial-like [Malus domestica]
MD06G1062300	--	--	--	--	[I]	Lipid transport and metabolism	Oxysterol-binding protein-related protein 2A OS=Arabidopsis thaliana GN=ORP2A PE=2 SV=1	S	Function unknown	PREDICTED: oxysterol-binding protein-related protein 2A-like isoform X4 [Malus domestica]
MD12G1257000	[Q]	Secondary metabolites biosynthesis, transport and catabolism	Molecular Function: iron ion binding (GO:0005506);; Molecular Function: electron carrier activity (GO:0009055);; Molecular Function: heme binding (GO:0020037);; Biological Process: oxidation-reduction process (GO:0055114);; Molecular Function: aromatase activity (GO:0070330);;	K15747|0|mdm:103451121|protein LUTEIN DEFICIENT 5, chloroplastic; K15747 beta-ring hydroxylase [EC:1.14.-.-] (A)	[QI]	--	Protein LUTEIN DEFICIENT 5, chloroplastic OS=Arabidopsis thaliana GN=CYP97A3 PE=1 SV=1	Q	Secondary metabolites biosynthesis, transport and catabolism	PREDICTED: protein LUTEIN DEFICIENT 5, chloroplastic isoform X1 [Pyrus x bretschneideri]
MD06G1035700	[R]	General function prediction only	--	--	[R]	General function prediction only	RNA-binding protein CP33, chloroplastic OS=Arabidopsis thaliana GN=CP33 PE=2 SV=1	S	Function unknown	PREDICTED: 29 kDa ribonucleoprotein A, chloroplastic [Malus domestica]
MD12G1053000	[LKJ]	--	Molecular Function: nucleic acid binding (GO:0003676);; Molecular Function: ATP binding (GO:0005524);; Molecular Function: ATP-dependent helicase activity (GO:0008026);;	K11594|0|mdm:103449657|DEAD-box ATP-dependent RNA helicase 37-like; K11594 ATP-dependent RNA helicase DDX3X [EC:3.6.4.13] (A)	[A]	RNA processing and modification	DEAD-box ATP-dependent RNA helicase 37 OS=Arabidopsis thaliana GN=RH37 PE=2 SV=2	L	Replication, recombination and repair	PREDICTED: DEAD-box ATP-dependent RNA helicase 37-like [Malus domestica]
MD15G1382300	--	--	--	--	--	--	--	S	Function unknown	PREDICTED: uncharacterized protein LOC103401973 isoform X1 [Malus domestica]
MD15G1134900	--	--	--	--	--	--	F-box protein At5g39450 OS=Arabidopsis thaliana GN=At5g39450 PE=2 SV=1	S	Function unknown	PREDICTED: F-box protein At5g39450-like [Malus domestica]
MD14G1090600	[L]	Replication, recombination and repair	Molecular Function: DNA binding (GO:0003677);; Molecular Function: DNA topoisomerase type II (ATP-hydrolyzing) activity (GO:0003918);; Molecular Function: ATP binding (GO:0005524);; Cellular Component: chromosome (GO:0005694);; Cellular Component: mitochondrion (GO:0005739);; Biological Process: DNA topological change (GO:0006265);; Cellular Component: chloroplast (GO:0009507);;	K02470|0|pper:PRUPE_ppa001942mg|hypothetical protein; K02470 DNA gyrase subunit B [EC:5.99.1.3] (A)	[B]	Chromatin structure and dynamics	DNA gyrase subunit B, chloroplastic/mitochondrial OS=Nicotiana benthamiana GN=GYRB PE=2 SV=1	L	Replication, recombination and repair	DNA gyrase subunit B, chloroplastic/mitochondrial-like [Prunus avium]
MD04G1129900	[K]	Transcription	--	--	[J]	Translation, ribosomal structure and biogenesis	Ribonuclease II, chloroplastic/mitochondrial OS=Arabidopsis thaliana GN=RNR1 PE=2 SV=1	K	Transcription	PREDICTED: ribonuclease II, chloroplastic/mitochondrial-like [Pyrus x bretschneideri]
MD16G1219000	[C]	Energy production and conversion	Cellular Component: cytoplasm (GO:0005737);; Biological Process: tricarboxylic acid cycle (GO:0006099);; Biological Process: malate metabolic process (GO:0006108);; Molecular Function: L-malate dehydrogenase activity (GO:0030060);; Biological Process: cellular carbohydrate metabolic process (GO:0044262);;	K00025|0|mdm:103426025|malate dehydrogenase; K00025 malate dehydrogenase [EC:1.1.1.37] (A)	[C]	Energy production and conversion	Malate dehydrogenase OS=Nicotiana tabacum GN=MD1 PE=1 SV=1	C	Energy production and conversion	PREDICTED: malate dehydrogenase-like [Malus domestica]
MD12G1096900	[G]	Carbohydrate transport and metabolism	Molecular Function: magnesium ion binding (GO:0000287);; Molecular Function: pyruvate kinase activity (GO:0004743);; Cellular Component: plasma membrane (GO:0005886);; Biological Process: glycolytic process (GO:0006096);; Biological Process: phosphorylation (GO:0016310);; Molecular Function: potassium ion binding (GO:0030955);; Biological Process: response to cadmium ion (GO:0046686);;	K00873|0|mdm:103449915|pyruvate kinase, cytosolic isozyme-like; K00873 pyruvate kinase [EC:2.7.1.40] (A)	[G]	Carbohydrate transport and metabolism	Pyruvate kinase 1, cytosolic OS=Oryza sativa subsp. japonica GN=Os11g0148500 PE=1 SV=1	G	Carbohydrate transport and metabolism	PREDICTED: pyruvate kinase 1, cytosolic [Malus domestica]
MD13G1009600	--	--	--	--	--	--	Tobamovirus multiplication protein 3 OS=Arabidopsis thaliana GN=TOM3 PE=1 SV=2	S	Function unknown	PREDICTED: tobamovirus multiplication protein 3-like [Malus domestica]
MD04G1185100	--	--	Biological Process: regulation of transcription, DNA-templated (GO:0006355);; Molecular Function: protein dimerization activity (GO:0046983);;	K12126|0|mdm:103433823|transcription factor PIF3; K12126 phytochrome-interacting factor 3 (A)	--	--	Transcription factor PIF3 OS=Arabidopsis thaliana GN=PIF3 PE=1 SV=1	K	Transcription	PREDICTED: transcription factor PIF3 isoform X1 [Malus domestica]
MD10G1261800	--	--	--	K04507|1.81007e-148|mdm:103446185|calcyclin-binding protein-like; K04507 calcyclin binding protein (A)	[T]	Signal transduction mechanisms	--	S	Function unknown	PREDICTED: calcyclin-binding protein-like [Malus domestica]
MD14G1121300	[R]	General function prediction only	Cellular Component: intracellular (GO:0005622);; Biological Process: RNA processing (GO:0006396);;	K12869|0|pxb:103928867|crooked neck-like protein 1; K12869 crooked neck (A)	[D]	Cell cycle control, cell division, chromosome partitioning	Cleavage stimulation factor subunit 77 OS=Arabidopsis thaliana GN=CSTF77 PE=1 SV=1	A	RNA processing and modification	PREDICTED: crooked neck-like protein 1 [Pyrus x bretschneideri]
MD02G1244400	[L]	Replication, recombination and repair	--	K10754|0|mdm:103438855|replication factor C subunit 1; K10754 replication factor C subunit 1 (A)	[L]	Replication, recombination and repair	Replication factor C subunit 1 OS=Arabidopsis thaliana GN=RFC1 PE=2 SV=1	S	Function unknown	PREDICTED: replication factor C subunit 1 [Malus domestica]
MD17G1197800	--	--	--	K10803|0|mdm:103405499|DNA repair protein XRCC1; K10803 DNA-repair protein XRCC1 (A)	[L]	Replication, recombination and repair	DNA-repair protein XRCC1 OS=Arabidopsis thaliana GN=XRCC1 PE=1 SV=1	L	Replication, recombination and repair	PREDICTED: DNA-repair protein XRCC1 [Malus domestica]
MD02G1315400	--	--	Molecular Function: nucleic acid binding (GO:0003676);;	K13096|4.4357e-176|mdm:103413335|SURP and G-patch domain-containing protein 1-like protein; K13096 splicing factor 4 (A)	[R]	General function prediction only	SURP and G-patch domain-containing protein 1-like protein OS=Arabidopsis thaliana GN=At3g52120 PE=2 SV=1	S	Function unknown	PREDICTED: SURP and G-patch domain-containing protein 1-like protein isoform X1 [Malus domestica]
MD09G1032200	--	--	--	--	--	--	--	S	Function unknown	PREDICTED: uncharacterized protein LOC103442251 [Malus domestica]
MD03G1094800	[T]	Signal transduction mechanisms	--	--	[T]	Signal transduction mechanisms	Probable protein phosphatase 2C 4 OS=Arabidopsis thaliana GN=PLL5 PE=2 SV=1	T	Signal transduction mechanisms	PREDICTED: probable protein phosphatase 2C 23 [Pyrus x bretschneideri]
MD11G1212700	[G]	Carbohydrate transport and metabolism	--	--	[G]	Carbohydrate transport and metabolism	1,4-alpha-glucan-branching enzyme 3, chloroplastic/amyloplastic OS=Arabidopsis thaliana GN=SBE3 PE=1 SV=1	G	Carbohydrate transport and metabolism	PREDICTED: 1,4-alpha-glucan-branching enzyme 3, chloroplastic/amyloplastic [Pyrus x bretschneideri]
MD02G1094300	[C]	Energy production and conversion	Biological Process: response to superoxide (GO:0000303);; Molecular Function: 3-chloroallyl aldehyde dehydrogenase activity (GO:0004028);; Molecular Function: aldehyde dehydrogenase (NAD) activity (GO:0004029);; Cellular Component: cytosol (GO:0005829);; Biological Process: cellular aldehyde metabolic process (GO:0006081);; Biological Process: response to auxin (GO:0009733);; Biological Process: …	K14085|0|pxb:103929705|aldehyde dehydrogenase family 7 member A1; K14085 aldehyde dehydrogenase family 7 member A1 [EC:1.2.1.31 1.2.1.8 1.2.1.3] (A)	[C]	Energy production and conversion	Aldehyde dehydrogenase family 7 member A1 OS=Malus domestica PE=1 SV=3	C	Energy production and conversion	PREDICTED: aldehyde dehydrogenase family 7 member A1 [Pyrus x bretschneideri]
MD16G1067200	[O]	Posttranslational modification, protein turnover, chaperones	--	K03036|0|mdm:103402861|26S proteasome non-ATPase regulatory subunit 11 homolog; K03036 26S proteasome regulatory subunit N6 (A)	[O]	Posttranslational modification, protein turnover, chaperones	26S proteasome non-ATPase regulatory subunit 11 homolog OS=Arabidopsis thaliana GN=RPN6 PE=1 SV=1	O	Posttranslational modification, protein turnover, chaperones	PREDICTED: 26S proteasome non-ATPase regulatory subunit 11 homolog [Malus domestica]
MD16G1255400	[H]	Coenzyme transport and metabolism	Molecular Function: prenyltransferase activity (GO:0004659);; Cellular Component: integral component of membrane (GO:0016021);;	K09833|0|mdm:103453843|homogentisate phytyltransferase 1, chloroplastic-like; K09833 homogentisate phytyltransferase / homogentisate geranylgeranyltransferase [EC:2.5.1.115 2.5.1.116] (A)	--	--	Homogentisate phytyltransferase 1, chloroplastic OS=Arabidopsis thaliana GN=HPT1 PE=1 SV=1	H	Coenzyme transport and metabolism	uncharacterized protein LOC103453843 [Malus domestica]
MD10G1338400	--	--	--	K07199|0|mdm:103446812|SNF1-related protein kinase regulatory subunit beta-2; K07199 5'-AMP-activated protein kinase, regulatory beta subunit (A)	[G]	Carbohydrate transport and metabolism	SNF1-related protein kinase regulatory subunit beta-2 OS=Arabidopsis thaliana GN=KINB2 PE=1 SV=1	S	Function unknown	PREDICTED: SNF1-related protein kinase regulatory subunit beta-2 isoform X2 [Malus domestica]
MD09G1222500	--	--	--	--	--	--	--	--	--	PREDICTED: uncharacterized protein LOC105350109 [Fragaria vesca subsp. vesca]
MD16G1106700	[U]	Intracellular trafficking, secretion, and vesicular transport	--	K03217|0|mdm:103425510|ALBINO3-like protein 1, chloroplastic; K03217 YidC/Oxa1 family membrane protein insertase (A)	[OU]	--	ALBINO3-like protein 1, chloroplastic OS=Arabidopsis thaliana GN=ALB3L1 PE=2 SV=3	U	Intracellular trafficking, secretion, and vesicular transport	PREDICTED: ALBINO3-like protein 1, chloroplastic [Malus domestica]
MD09G1233800	[GER]	--	Biological Process: purine nucleobase transport (GO:0006863);; Cellular Component: integral component of membrane (GO:0016021);;	K15280|0|mdm:103444054|probable sugar phosphate/phosphate translocator At1g06470; K15280 solute carrier family 35, member C2 (A)	[S]	Function unknown	Probable sugar phosphate/phosphate translocator At1g06470 OS=Arabidopsis thaliana GN=At1g06470 PE=2 SV=1	EG	--	PREDICTED: probable sugar phosphate/phosphate translocator At1g06470 [Malus domestica]
MD07G1232800	--	--	Molecular Function: DNA binding (GO:0003677);; Cellular Component: nucleus (GO:0005634);; Molecular Function: zinc ion binding (GO:0008270);; Biological Process: chloroplast organization (GO:0009658);; Biological Process: myo-inositol hexakisphosphate biosynthetic process (GO:0010264);; Biological Process: positive regulation of transcription, DNA-templated (GO:0045893);;	--	--	--	--	S	Function unknown	PREDICTED: uncharacterized protein LOC103432914 [Malus domestica]
MD17G1038800	--	--	--	--	[K]	Transcription	--	S	Function unknown	PREDICTED: uncharacterized protein LOC103404360 [Malus domestica]
MD05G1023700	--	--	--	--	[S]	Function unknown	--	S	Function unknown	PREDICTED: protein FAM188A-like [Malus domestica]
MD10G1261500	[O]	Posttranslational modification, protein turnover, chaperones	Biological Process: protein polyubiquitination (GO:0000209);; Biological Process: mitotic cell cycle (GO:0000278);; Cellular Component: cytosol (GO:0005829);; Biological Process: DNA repair (GO:0006281);; Biological Process: RNA processing (GO:0006396);; Biological Process: ubiquitin-dependent protein catabolic process (GO:0006511);; Biological Process: sister chromatid cohesion (GO:0007062);; Bi…	K10609|0|pxb:103951281|cullin-4; K10609 cullin 4 (A)	[D]	Cell cycle control, cell division, chromosome partitioning	Cullin-4 OS=Arabidopsis thaliana GN=CUL4 PE=1 SV=1	O	Posttranslational modification, protein turnover, chaperones	PREDICTED: cullin-4 [Pyrus x bretschneideri]
MD16G1095400	[M]	Cell wall/membrane/envelope biogenesis	Molecular Function: polygalacturonase activity (GO:0004650);; Cellular Component: extracellular region (GO:0005576);; Biological Process: carbohydrate metabolic process (GO:0005975);;	--	--	--	Polygalacturonase At1g48100 OS=Arabidopsis thaliana GN=At1g48100 PE=2 SV=1	M	Cell wall/membrane/envelope biogenesis	PREDICTED: polygalacturonase At1g48100-like [Malus domestica]
MD13G1029800	--	--	--	K14011|0|pxb:103943065|UBX domain-containing protein 6; K14011 UBX domain-containing protein 6 (A)	[O]	Posttranslational modification, protein turnover, chaperones	Plant UBX domain-containing protein 2 OS=Arabidopsis thaliana GN=PUX2 PE=1 SV=2	S	Function unknown	PREDICTED: plant UBX domain-containing protein 2 [Pyrus x bretschneideri]
MD10G1156300	[O]	Posttranslational modification, protein turnover, chaperones	Biological Process: protein folding (GO:0006457);;	K09571|0|pxb:103961387|peptidyl-prolyl cis-trans isomerase FKBP62-like; K09571 FK506-binding protein 4/5 [EC:5.2.1.8] (A)	[O]	Posttranslational modification, protein turnover, chaperones	Peptidyl-prolyl cis-trans isomerase FKBP62 OS=Arabidopsis thaliana GN=FKBP62 PE=1 SV=2	O	Posttranslational modification, protein turnover, chaperones	PREDICTED: peptidyl-prolyl cis-trans isomerase FKBP62-like [Pyrus x bretschneideri]
MD14G1121800	--	--	--	--	--	--	Protein trichome birefringence-like 23 OS=Arabidopsis thaliana GN=TBL23 PE=2 SV=1	S	Function unknown	PREDICTED: protein trichome birefringence-like 23 [Pyrus x bretschneideri]
MD14G1064600	--	--	--	--	--	--	--	S	Function unknown	PREDICTED: uncharacterized protein LOC103936952 [Pyrus x bretschneideri]
MD02G1206000	[J]	Translation, ribosomal structure and biogenesis	Molecular Function: aminopeptidase activity (GO:0004177);; Biological Process: proteolysis (GO:0006508);; Molecular Function: metalloexopeptidase activity (GO:0008235);; Biological Process: cellular process (GO:0009987);; Molecular Function: metal ion binding (GO:0046872);;	K01265|0|mdm:103405975|methionine aminopeptidase 1A-like; K01265 methionyl aminopeptidase [EC:3.4.11.18] (A)	[O]	Posttranslational modification, protein turnover, chaperones	Methionine aminopeptidase 1A OS=Arabidopsis thaliana GN=MAP1A PE=1 SV=1	J	Translation, ribosomal structure and biogenesis	PREDICTED: methionine aminopeptidase 1A-like [Malus domestica]
MD00G1000600	--	--	Biological Process: photosynthesis, light reaction (GO:0019684);; Biological Process: regulation of protein dephosphorylation (GO:0035304);;	--	--	--	Protein LOW PSII ACCUMULATION 3, chloroplastic OS=Arabidopsis thaliana GN=LPA3 PE=1 SV=1	S	Function unknown	PREDICTED: protein LOW PSII ACCUMULATION 3, chloroplastic [Prunus mume]
MD04G1136900	[RTKL]	--	Molecular Function: protein serine/threonine kinase activity (GO:0004674);; Molecular Function: ATP binding (GO:0005524);; Biological Process: protein phosphorylation (GO:0006468);;	K08269|0|mdm:103433464|serine/threonine-protein kinase ATG1-like; K08269 serine/threonine-protein kinase ULK/ATG1 [EC:2.7.11.1] (A)	[OUT]	--	Serine/threonine-protein kinase ATG1c OS=Arabidopsis thaliana GN=ATG1C PE=2 SV=1	T	Signal transduction mechanisms	PREDICTED: serine/threonine-protein kinase ATG1c-like [Malus domestica]
MD17G1187800	--	--	Biological Process: cell morphogenesis (GO:0000902);; Biological Process: protein targeting to vacuole (GO:0006623);; Biological Process: tRNA processing (GO:0008033);; Cellular Component: membrane (GO:0016020);; Biological Process: cell growth (GO:0016049);; Molecular Function: hydrolase activity (GO:0016787);; Biological Process: Golgi vesicle transport (GO:0048193);;	--	--	--	VHS domain-containing protein At3g16270 OS=Arabidopsis thaliana GN=At3g16270 PE=1 SV=1	S	Function unknown	PREDICTED: VHS domain-containing protein At3g16270 [Malus domestica]
MD06G1132600	--	--	--	--	--	--	Coiled-coil domain-containing protein SCD2 OS=Arabidopsis thaliana GN=SCD2 PE=1 SV=1	S	Function unknown	PREDICTED: coiled-coil domain-containing protein SCD2-like isoform X2 [Malus domestica]
MD02G1032700	[V]	Defense mechanisms	--	--	[Q]	Secondary metabolites biosynthesis, transport and catabolism	Pleiotropic drug resistance protein 1 OS=Nicotiana tabacum GN=PDR1 PE=2 SV=1	V	Defense mechanisms	PREDICTED: pleiotropic drug resistance protein 1-like [Malus domestica]
MD03G1118200	--	--	Biological Process: calcium ion transport (GO:0006816);; Biological Process: cellular zinc ion homeostasis (GO:0006882);; Biological Process: response to nematode (GO:0009624);;	--	[S]	Function unknown	Vacuolar fusion protein MON1 homolog OS=Arabidopsis thaliana GN=MON1 PE=1 SV=2	U	Intracellular trafficking, secretion, and vesicular transport	PREDICTED: protein SAND-like [Malus domestica]
MD03G1161700	[D]	Cell cycle control, cell division, chromosome partitioning	Molecular Function: ATP binding (GO:0005524);; Cellular Component: chromosome (GO:0005694);; Biological Process: chromosome organization (GO:0051276);;	K06669|0|mdm:103425575|structural maintenance of chromosomes protein 3-like; K06669 structural maintenance of chromosome 3 (chondroitin sulfate proteoglycan 6) (A)	[D]	Cell cycle control, cell division, chromosome partitioning	Structural maintenance of chromosomes protein 3 OS=Arabidopsis thaliana GN=SMC3 PE=2 SV=1	D	Cell cycle control, cell division, chromosome partitioning	PREDICTED: structural maintenance of chromosomes protein 3-like [Malus domestica]
MD11G1211000	[O]	Posttranslational modification, protein turnover, chaperones	--	K12160|1.54534e-67|pxb:103926988|small ubiquitin-related modifier 1; K12160 small ubiquitin-related modifier (A)	[O]	Posttranslational modification, protein turnover, chaperones	Small ubiquitin-related modifier 2 OS=Arabidopsis thaliana GN=SUMO2 PE=1 SV=1	O	Posttranslational modification, protein turnover, chaperones	PREDICTED: small ubiquitin-related modifier 1 [Malus domestica]
MD14G1236000	[QR]	--	Molecular Function: phosphoethanolamine N-methyltransferase activity (GO:0000234);; Biological Process: phosphatidylcholine biosynthetic process (GO:0006656);; Biological Process: methylation (GO:0032259);;	K05929|0|mdm:103424613|phosphoethanolamine N-methyltransferase 1; K05929 phosphoethanolamine N-methyltransferase [EC:2.1.1.103] (A)	[IR]	--	Phosphoethanolamine N-methyltransferase 1 OS=Arabidopsis thaliana GN=NMT1 PE=1 SV=1	S	Function unknown	PREDICTED: phosphoethanolamine N-methyltransferase 1 [Malus domestica]
MD03G1210100	[H]	Coenzyme transport and metabolism	Cellular Component: mitochondrion (GO:0005739);; Cellular Component: cytosol (GO:0005829);; Biological Process: cellular response to DNA damage stimulus (GO:0006974);; Molecular Function: zinc ion binding (GO:0008270);; Biological Process: thiamine biosynthetic process (GO:0009228);; Biological Process: response to cold (GO:0009409);; Cellular Component: chloroplast stroma (GO:0009570);; Cellular…	K03146|0|pxb:103948770|thiamine thiazole synthase, chloroplastic-like; K03146 thiamine thiazole synthase (A)	[R]	General function prediction only	Thiamine thiazole synthase, chloroplastic OS=Citrus sinensis GN=THI1 PE=2 SV=1	H	Coenzyme transport and metabolism	PREDICTED: LOW QUALITY PROTEIN: thiamine thiazole synthase, chloroplastic [Malus domestica]
MD16G1000100	--	--	Molecular Function: nucleotide binding (GO:0000166);; Molecular Function: nucleic acid binding (GO:0003676);; Molecular Function: zinc ion binding (GO:0008270);;	--	[R]	General function prediction only	Transcription initiation factor TFIID subunit 15 OS=Arabidopsis thaliana GN=TAF15 PE=1 SV=1	S	Function unknown	PREDICTED: transcription initiation factor TFIID subunit 15-like [Malus domestica]
MD09G1129800	--	--	--	--	--	--	GBF-interacting protein 1 OS=Arabidopsis thaliana GN=GIP1 PE=1 SV=1	S	Function unknown	PREDICTED: GBF-interacting protein 1-like isoform X2 [Malus domestica]
MD06G1029300	[G]	Carbohydrate transport and metabolism	--	K00873|0|mdm:103436870|pyruvate kinase isozyme G, chloroplastic; K00873 pyruvate kinase [EC:2.7.1.40] (A)	[G]	Carbohydrate transport and metabolism	Pyruvate kinase isozyme G, chloroplastic OS=Nicotiana tabacum PE=2 SV=1	G	Carbohydrate transport and metabolism	PREDICTED: pyruvate kinase isozyme G, chloroplastic [Malus domestica]
MD08G1147100	--	--	Molecular Function: double-stranded DNA binding (GO:0003690);; Molecular Function: sequence-specific DNA binding transcription factor activity (GO:0003700);; Cellular Component: nucleus (GO:0005634);; Biological Process: regulation of transcription, DNA-templated (GO:0006355);; Biological Process: response to abscisic acid (GO:0009737);; Biological Process: gibberellic acid mediated signaling pat…	K16241|1.75073e-84|mdm:103450118|HY5; transcription factor HY5; K16241 transcription factor HY5 (A)	[K]	Transcription	Transcription factor HY5 OS=Arabidopsis thaliana GN=HY5 PE=1 SV=1	K	Transcription	transcription factor HY5 [Malus domestica]
MD17G1119500	--	--	Cellular Component: intracellular (GO:0005622);; Molecular Function: zinc ion binding (GO:0008270);;	--	--	--	Zinc finger protein CONSTANS-LIKE 9 OS=Arabidopsis thaliana GN=COL9 PE=2 SV=1	S	Function unknown	zinc finger protein CONSTANS-LIKE 9-like [Malus domestica]
MD03G1116100	[I]	Lipid transport and metabolism	Molecular Function: ATP binding (GO:0005524);; Cellular Component: mitochondrial matrix (GO:0005759);; Biological Process: leucine catabolic process (GO:0006552);; Molecular Function: isovaleryl-CoA dehydrogenase activity (GO:0008470);; Biological Process: response to sucrose (GO:0009744);; Biological Process: response to fructose (GO:0009750);; Molecular Function: flavin adenine dinucleotide bin…	K00253|0|pxb:103938725|isovaleryl-CoA dehydrogenase, mitochondrial; K00253 isovaleryl-CoA dehydrogenase [EC:1.3.8.4] (A)	[EI]	--	Isovaleryl-CoA dehydrogenase, mitochondrial OS=Solanum tuberosum GN=IVD PE=1 SV=2	I	Lipid transport and metabolism	PREDICTED: isovaleryl-CoA dehydrogenase, mitochondrial [Pyrus x bretschneideri]
MD07G1171600	--	--	--	--	[TO]	--	--	O	Posttranslational modification, protein turnover, chaperones	PREDICTED: OTU domain-containing protein DDB_G0284757-like isoform X1 [Malus domestica]
MD09G1192900	[O]	Posttranslational modification, protein turnover, chaperones	Molecular Function: ATP binding (GO:0005524);; Cellular Component: cytoplasm (GO:0005737);; Biological Process: protein refolding (GO:0042026);;	K04077|0|mdm:103453565|chaperonin CPN60-like 2, mitochondrial; K04077 chaperonin GroEL (A)	[O]	Posttranslational modification, protein turnover, chaperones	Chaperonin CPN60-like 2, mitochondrial OS=Arabidopsis thaliana GN=At3g13860 PE=1 SV=2	O	Posttranslational modification, protein turnover, chaperones	PREDICTED: chaperonin CPN60-like 2, mitochondrial [Malus domestica]
MD17G1189500	--	--	Cellular Component: peroxisome (GO:0005777);; Cellular Component: cytosol (GO:0005829);; Biological Process: fatty acid beta-oxidation (GO:0006635);; Molecular Function: zinc ion binding (GO:0008270);; Biological Process: photomorphogenesis (GO:0009640);; Biological Process: protein import into peroxisome matrix (GO:0016558);;	K06664|0|mdm:103405436|peroxisome biogenesis protein 2; K06664 peroxin-2 (A)	[O]	Posttranslational modification, protein turnover, chaperones	Peroxisome biogenesis protein 2 OS=Arabidopsis thaliana GN=PEX2 PE=1 SV=1	O	Posttranslational modification, protein turnover, chaperones	PREDICTED: peroxisome biogenesis protein 2 [Malus domestica]
MD03G1143400	--	--	--	--	--	--	--	S	Function unknown	PREDICTED: uncharacterized protein LOC103446586 [Malus domestica]
MD12G1206900	[T]	Signal transduction mechanisms	Biological Process: response to stress (GO:0006950);;	--	--	--	Universal stress protein A-like protein OS=Arabidopsis thaliana GN=At3g01520 PE=1 SV=2	S	Function unknown	PREDICTED: universal stress protein Slr1101-like [Malus domestica]
MD15G1166400	--	--	--	K12607|0|mdm:103400075|CCR4-NOT transcription complex subunit 10-like; K12607 CCR4-NOT transcription complex subunit 10 (A)	[R]	General function prediction only	--	K	Transcription	PREDICTED: CCR4-NOT transcription complex subunit 10-like [Malus domestica]
MD12G1168500	--	--	--	--	--	--	--	S	Function unknown	PREDICTED: uncharacterized protein LOC103452935 [Malus domestica]
MD05G1033400	--	--	--	K12124|0|mdm:103448893|protein GIGANTEA-like; K12124 GIGANTEA (A)	--	--	Protein GIGANTEA OS=Arabidopsis thaliana GN=GI PE=1 SV=2	S	Function unknown	PREDICTED: protein GIGANTEA-like [Malus domestica]
MD09G1076900	--	--	--	--	[R]	General function prediction only	FHA domain-containing protein DDL OS=Arabidopsis thaliana GN=DDL PE=1 SV=1	T	Signal transduction mechanisms	PREDICTED: kanadaptin-like [Malus domestica]
MD16G1003900	[O]	Posttranslational modification, protein turnover, chaperones	--	K00587|7.2066e-142|mdm:103403394|protein-S-isoprenylcysteine O-methyltransferase A-like; K00587 protein-S-isoprenylcysteine O-methyltransferase [EC:2.1.1.100] (A)	[O]	Posttranslational modification, protein turnover, chaperones	Protein-S-isoprenylcysteine O-methyltransferase B OS=Arabidopsis thaliana GN=ICMTB PE=1 SV=1	O	Posttranslational modification, protein turnover, chaperones	PREDICTED: protein-S-isoprenylcysteine O-methyltransferase A-like isoform X3 [Malus domestica]
MD03G1001800	--	--	Biological Process: RNA splicing, via endonucleolytic cleavage and ligation (GO:0000394);; Molecular Function: calmodulin binding (GO:0005516);; Cellular Component: endoplasmic reticulum (GO:0005783);; Biological Process: N-glycan processing (GO:0006491);; Biological Process: methionine biosynthetic process (GO:0009086);; Biological Process: cellulose biosynthetic process (GO:0030244);; Biologica…	K08288|0|mdm:103414660|glucosidase 2 subunit beta-like; K08288 protein kinase C substrate 80K-H (A)	[T]	Signal transduction mechanisms	Glucosidase 2 subunit beta OS=Arabidopsis thaliana GN=PSL4 PE=2 SV=1	O	Posttranslational modification, protein turnover, chaperones	PREDICTED: glucosidase 2 subunit beta-like [Malus domestica]
MD14G1134100	[O]	Posttranslational modification, protein turnover, chaperones	Molecular Function: ATP binding (GO:0005524);; Biological Process: response to stress (GO:0006950);;	K09490|0|pxb:103935935|luminal-binding protein 5; K09490 heat shock 70kDa protein 5 (A)	[O]	Posttranslational modification, protein turnover, chaperones	Luminal-binding protein 5 OS=Nicotiana tabacum GN=BIP5 PE=2 SV=1	O	Posttranslational modification, protein turnover, chaperones	PREDICTED: luminal-binding protein 5 [Malus domestica]
MD01G1182700	[A]	RNA processing and modification	--	--	[A]	RNA processing and modification	--	A	RNA processing and modification	PREDICTED: luc7-like protein 3 [Malus domestica]
MD01G1048800	--	--	--	--	[R]	General function prediction only	Elicitor-responsive protein 3 OS=Oryza sativa subsp. japonica GN=ERG3 PE=1 SV=1	S	Function unknown	PREDICTED: elicitor-responsive protein 3-like [Malus domestica]
MD03G1171100	[O]	Posttranslational modification, protein turnover, chaperones	--	K09527|0|pxb:103963816|uncharacterized LOC103963816; K09527 DnaJ homolog subfamily C member 7 (A)	[O]	Posttranslational modification, protein turnover, chaperones	TPR repeat-containing thioredoxin TTL4 OS=Arabidopsis thaliana GN=TTL4 PE=2 SV=1	O	Posttranslational modification, protein turnover, chaperones	PREDICTED: uncharacterized protein LOC103426979 isoform X2 [Malus domestica]
MD01G1110800	--	--	--	K04650|0|mdm:103432458|uncharacterized LOC103432458; K04650 nuclear receptor co-repressor 1 (A)	[K]	Transcription	--	K	Transcription	PREDICTED: uncharacterized protein LOC103432458 isoform X2 [Malus domestica]
MD03G1141100	--	--	--	K18213|0|mdm:103419666|proteinaceous RNase P 2-like; K18213 proteinaceous RNase P [EC:3.1.26.5] (A)	[R]	General function prediction only	Proteinaceous RNase P 2 OS=Arabidopsis thaliana GN=PRORP2 PE=1 SV=1	V	Defense mechanisms	PREDICTED: proteinaceous RNase P 2-like isoform X1 [Malus domestica]
MD01G1139500	--	--	--	K10523|0|pxb:103935799|BTB/POZ and MATH domain-containing protein 3-like; K10523 speckle-type POZ protein (A)	[DR]	--	BTB/POZ and MATH domain-containing protein 3 OS=Arabidopsis thaliana GN=BPM3 PE=1 SV=1	S	Function unknown	PREDICTED: BTB/POZ and MATH domain-containing protein 3-like isoform X1 [Pyrus x bretschneideri]
MD08G1049700	[T]	Signal transduction mechanisms	--	K17506|0|mdm:103449062|probable protein phosphatase 2C 59; K17506 protein phosphatase 1L [EC:3.1.3.16] (A)	[T]	Signal transduction mechanisms	Probable protein phosphatase 2C 59 OS=Arabidopsis thaliana GN=WIN2 PE=1 SV=1	T	Signal transduction mechanisms	PREDICTED: probable protein phosphatase 2C 59 [Malus domestica]
MD08G1186900	[J]	Translation, ribosomal structure and biogenesis	Molecular Function: structural constituent of ribosome (GO:0003735);; Cellular Component: ribosome (GO:0005840);; Biological Process: translation (GO:0006412);;	K02991|6.05455e-147|mdm:103448627|40S ribosomal protein S6; K02991 small subunit ribosomal protein S6e (A)	[J]	Translation, ribosomal structure and biogenesis	40S ribosomal protein S6 OS=Asparagus officinalis GN=rps6 PE=2 SV=1	J	Translation, ribosomal structure and biogenesis	PREDICTED: 40S ribosomal protein S6 [Malus domestica]
MD03G1199000	[E]	Amino acid transport and metabolism	--	K01759|0|mdm:103428562|putative lactoylglutathione lyase; K01759 lactoylglutathione lyase [EC:4.4.1.5] (A)	[G]	Carbohydrate transport and metabolism	Putative lactoylglutathione lyase OS=Brassica oleracea var. gemmifera PE=2 SV=1	E	Amino acid transport and metabolism	PREDICTED: putative lactoylglutathione lyase isoform X1 [Malus domestica]
MD05G1275500	[V]	Defense mechanisms	Molecular Function: ATP binding (GO:0005524);; Biological Process: ATP catabolic process (GO:0006200);; Cellular Component: integral component of membrane (GO:0016021);; Molecular Function: ATPase activity, coupled to transmembrane movement of substances (GO:0042626);; Biological Process: transmembrane transport (GO:0055085);;	--	[Q]	Secondary metabolites biosynthesis, transport and catabolism	ABC transporter C family member 2 OS=Arabidopsis thaliana GN=ABCC2 PE=1 SV=2	V	Defense mechanisms	PREDICTED: ABC transporter C family member 2-like [Pyrus x bretschneideri]
MD02G1172600	[R]	General function prediction only	Molecular Function: nucleotide binding (GO:0000166);; Molecular Function: nucleic acid binding (GO:0003676);;	K14411|0|mdm:103403113|heterogeneous nuclear ribonucleoprotein A/B; K14411 RNA-binding protein Musashi (A)	[R]	General function prediction only	Heterogeneous nuclear ribonucleoprotein 1 OS=Arabidopsis thaliana GN=RNP1 PE=1 SV=1	S	Function unknown	PREDICTED: heterogeneous nuclear ribonucleoprotein A/B [Malus domestica]
MD01G1154700	--	--	--	K04646|0|mdm:103437458|clathrin heavy chain 1; K04646 clathrin heavy chain (A)	[U]	Intracellular trafficking, secretion, and vesicular transport	Clathrin heavy chain 1 OS=Arabidopsis thaliana GN=CHC1 PE=1 SV=1	U	Intracellular trafficking, secretion, and vesicular transport	PREDICTED: clathrin heavy chain 1 [Malus domestica]
MD02G1096100	--	--	--	K13464|0|mdm:103451320|protein TIFY 10A; K13464 jasmonate ZIM domain-containing protein (A)	--	--	Protein TIFY 10A OS=Arabidopsis thaliana GN=TIFY10A PE=1 SV=1	S	Function unknown	PREDICTED: protein TIFY 10A [Malus domestica]
MD05G1361800	--	--	--	K11267|0|mdm:103434402|sister chromatid cohesion protein PDS5 homolog A-like; K11267 sister chromatid cohesion protein PDS5 (A)	[D]	Cell cycle control, cell division, chromosome partitioning	DNA mismatch repair protein MSH6 OS=Arabidopsis thaliana GN=MSH6 PE=1 SV=2	S	Function unknown	PREDICTED: sister chromatid cohesion protein PDS5 homolog A-like isoform X1 [Malus domestica]
MD15G1155100	--	--	--	--	[S]	Function unknown	--	S	Function unknown	PREDICTED: protein RTF2 homolog [Malus domestica]
MD14G1054000	--	--	Cellular Component: cell part (GO:0044464);;	--	--	--	--	S	Function unknown	uncharacterized protein LOC18770244 [Prunus persica]
MD10G1328100	[R]	General function prediction only	Biological Process: ethylene biosynthetic process (GO:0009693);; Molecular Function: 1-aminocyclopropane-1-carboxylate oxidase activity (GO:0009815);; Biological Process: fruit ripening (GO:0009835);; Molecular Function: oxidoreductase activity, acting on paired donors, with incorporation or reduction of molecular oxygen, 2-oxoglutarate as one donor, and incorporation of one atom each of oxygen i…	K05933|0|pxb:103948231|ACO, PbACO1; 1-aminocyclopropane-1-carboxylate oxidase 1 (EC:1.14.17.4); K05933 aminocyclopropanecarboxylate oxidase [EC:1.14.17.4] (A)	[QR]	--	1-aminocyclopropane-1-carboxylate oxidase 1 OS=Malus domestica PE=1 SV=1	S	Function unknown	RecName: Full=1-aminocyclopropane-1-carboxylate oxidase 1; Short=ACC oxidase 1; AltName: Full=Ethylene-forming enzyme; Short=EFE; AltName: Full=PAE12; AltName: Full=Protein AP4
MD00G1159300	--	--	Molecular Function: aspartic-type endopeptidase activity (GO:0004190);; Biological Process: proteolysis (GO:0006508);; Biological Process: lipid metabolic process (GO:0006629);;	K08245|0|pxb:103951388|aspartic proteinase A1-like; K08245 phytepsin [EC:3.4.23.40] (A)	[O]	Posttranslational modification, protein turnover, chaperones	Aspartic proteinase A1 OS=Arabidopsis thaliana GN=APA1 PE=1 SV=1	O	Posttranslational modification, protein turnover, chaperones	PREDICTED: aspartic proteinase A1-like [Pyrus x bretschneideri]
MD04G1227000	--	--	--	K13162|0|mdm:103434184|poly(rC)-binding protein 1; K13162 poly(rC)-binding protein 2/3/4 (A)	[AR]	--	Flowering locus K homology domain OS=Arabidopsis thaliana GN=FLK PE=1 SV=1	S	Function unknown	PREDICTED: flowering locus K homology domain isoform X1 [Malus domestica]
MD14G1137500	--	--	--	--	--	--	Protein BRANCHLESS TRICHOME OS=Arabidopsis thaliana GN=BLT PE=1 SV=1	S	Function unknown	PREDICTED: protein BRANCHLESS TRICHOME-like [Malus domestica]
MD10G1164000	[RTKL]	--	Biological Process: activation of MAPKK activity (GO:0000186);; Molecular Function: MAP kinase kinase kinase activity (GO:0004709);; Molecular Function: ATP binding (GO:0005524);; Biological Process: glucuronoxylan metabolic process (GO:0010413);; Biological Process: xylan biosynthetic process (GO:0045492);;	--	--	--	Probable LRR receptor-like serine/threonine-protein kinase At5g48740 OS=Arabidopsis thaliana GN=At5g48740 PE=2 SV=1	T	Signal transduction mechanisms	PREDICTED: probable LRR receptor-like serine/threonine-protein kinase At5g48740 [Malus domestica]
MD03G1272700	[RTKL]	--	Molecular Function: protein serine/threonine kinase activity (GO:0004674);; Molecular Function: ATP binding (GO:0005524);; Biological Process: protein phosphorylation (GO:0006468);;	--	[T]	Signal transduction mechanisms	Receptor-like cytosolic serine/threonine-protein kinase RBK2 OS=Arabidopsis thaliana GN=RBK2 PE=1 SV=1	T	Signal transduction mechanisms	PREDICTED: receptor-like cytosolic serine/threonine-protein kinase RBK2 [Malus domestica]
MD07G1077300	[Q]	Secondary metabolites biosynthesis, transport and catabolism	--	K00142|0|pxb:103951690|putative acyl-activating enzyme 19; K00142 acyl-CoA synthetase [EC:6.2.1.-] (A)	[Q]	Secondary metabolites biosynthesis, transport and catabolism	Putative acyl-activating enzyme 19 OS=Arabidopsis thaliana GN=At5g35930 PE=2 SV=1	Q	Secondary metabolites biosynthesis, transport and catabolism	PREDICTED: putative acyl-activating enzyme 19 isoform X1 [Pyrus x bretschneideri]
MD02G1226500	--	--	Molecular Function: nucleotide binding (GO:0000166);;	--	[UR]	--	Dynamin-related protein 1E OS=Arabidopsis thaliana GN=DRP1E PE=1 SV=1	S	Function unknown	PREDICTED: dynamin-related protein 1E-like [Malus domestica]
MD02G1067200	--	--	--	K01301|0|mdm:103426730|probable glutamate carboxypeptidase 2; K01301 N-acetylated-alpha-linked acidic dipeptidase [EC:3.4.17.21] (A)	[OPR]	--	Probable glutamate carboxypeptidase LAMP1 OS=Arabidopsis thaliana GN=LAMP1 PE=2 SV=1	S	Function unknown	PREDICTED: probable glutamate carboxypeptidase 2, partial [Malus domestica]
MD03G1003300	[J]	Translation, ribosomal structure and biogenesis	Molecular Function: nucleic acid binding (GO:0003676);; Molecular Function: lysine-tRNA ligase activity (GO:0004824);; Molecular Function: ATP binding (GO:0005524);; Cellular Component: mitochondrion (GO:0005739);; Biological Process: rRNA processing (GO:0006364);; Biological Process: lysyl-tRNA aminoacylation (GO:0006430);; Cellular Component: chloroplast (GO:0009507);; Biological Process: chlor…	K04567|0|mdm:103414768|probable lysine--tRNA ligase, cytoplasmic; K04567 lysyl-tRNA synthetase, class II [EC:6.1.1.6] (A)	[J]	Translation, ribosomal structure and biogenesis	Lysine--tRNA ligase, chloroplastic/mitochondrial OS=Arabidopsis thaliana GN=OVA5 PE=2 SV=1	J	Translation, ribosomal structure and biogenesis	PREDICTED: lysine--tRNA ligase, chloroplastic/mitochondrial-like [Malus domestica]
MD13G1094100	[M]	Cell wall/membrane/envelope biogenesis	Molecular Function: polygalacturonase activity (GO:0004650);; Cellular Component: extracellular region (GO:0005576);; Biological Process: carbohydrate metabolic process (GO:0005975);;	--	--	--	Polygalacturonase At1g48100 OS=Arabidopsis thaliana GN=At1g48100 PE=2 SV=1	M	Cell wall/membrane/envelope biogenesis	PREDICTED: polygalacturonase At1g48100 [Malus domestica]
MD08G1051800	--	--	--	K17065|0|mdm:103440559|dynamin-related protein 3A-like; K17065 dynamin 1-like protein [EC:3.6.5.5] (A)	[UR]	--	Dynamin-related protein 3A OS=Arabidopsis thaliana GN=DRP3A PE=1 SV=2	S	Function unknown	PREDICTED: dynamin-related protein 3A-like isoform X5 [Malus domestica]
MD03G1039300	[O]	Posttranslational modification, protein turnover, chaperones	Molecular Function: serine-type endopeptidase activity (GO:0004252);; Biological Process: proteolysis (GO:0006508);; Molecular Function: identical protein binding (GO:0042802);; Biological Process: negative regulation of catalytic activity (GO:0043086);;	--	--	--	Subtilisin-like protease SBT5.4 OS=Arabidopsis thaliana GN=SBT5.4 PE=1 SV=1	O	Posttranslational modification, protein turnover, chaperones	PREDICTED: subtilisin-like protease SBT5.4 [Malus domestica]
MD03G1001300	[Z]	Cytoskeleton	--	K10406|0|mdm:103414609|kinesin-like protein Klp68D; K10406 kinesin family member C2/C3 (A)	[Z]	Cytoskeleton	Kinesin-like protein KIN-14T OS=Arabidopsis thaliana GN=KIN14T PE=3 SV=1	Z	Cytoskeleton	PREDICTED: kinesin-like protein Klp68D isoform X1 [Malus domestica]
MD16G1279500	--	--	Biological Process: translational initiation (GO:0006413);; Cellular Component: translation preinitiation complex (GO:0070993);;	K03245|2.12774e-118|mdm:103401542|eukaryotic translation initiation factor 3 subunit J-like; K03245 translation initiation factor 3 subunit J (A)	[J]	Translation, ribosomal structure and biogenesis	--	J	Translation, ribosomal structure and biogenesis	PREDICTED: eukaryotic translation initiation factor 3 subunit J-A-like [Malus domestica]
MD07G1080500	--	--	--	--	--	--	--	S	Function unknown	PREDICTED: uncharacterized protein LOC103438899 [Malus domestica]
MD04G1003800	[I]	Lipid transport and metabolism	Molecular Function: acetyl-CoA C-acyltransferase activity (GO:0003988);; Biological Process: metabolic process (GO:0008152);;	K07513|0|mdm:103443506|3-ketoacyl-CoA thiolase 2, peroxisomal; K07513 acetyl-CoA acyltransferase 1 [EC:2.3.1.16] (A)	[I]	Lipid transport and metabolism	3-ketoacyl-CoA thiolase 2, peroxisomal OS=Arabidopsis thaliana GN=PED1 PE=1 SV=2	I	Lipid transport and metabolism	PREDICTED: 3-ketoacyl-CoA thiolase 2, peroxisomal [Malus domestica]
MD15G1033000	[R]	General function prediction only	--	--	[R]	General function prediction only	Haloacid dehalogenase-like hydrolase domain-containing protein Sgpp OS=Arabidopsis thaliana GN=SGPP PE=1 SV=2	S	Function unknown	PREDICTED: haloacid dehalogenase-like hydrolase domain-containing protein Sgpp isoform X1 [Malus domestica]
MD16G1209600	--	--	Biological Process: response to abiotic stimulus (GO:0009628);; Biological Process: cell differentiation (GO:0030154);; Biological Process: macromolecule localization (GO:0033036);; Biological Process: primary metabolic process (GO:0044238);; Biological Process: cellular macromolecule metabolic process (GO:0044260);; Biological Process: single organism reproductive process (GO:0044702);; Biologic…	--	[S]	Function unknown	Zinc finger CCCH domain-containing protein 59 OS=Oryza sativa subsp. japonica GN=Os09g0364000 PE=2 SV=1	S	Function unknown	PREDICTED: CWF19-like protein 2 [Pyrus x bretschneideri]
MD10G1331000	--	--	Molecular Function: nucleic acid binding (GO:0003676);; Biological Process: transcription, DNA-templated (GO:0006351);; Cellular Component: thylakoid (GO:0009579);; Cellular Component: membrane part (GO:0044425);;	K03138|0|mdm:103446770|transcription initiation factor IIF subunit alpha-like; K03138 transcription initiation factor TFIIF subunit alpha (A)	[K]	Transcription	Transcription initiation factor IIF subunit alpha OS=Arabidopsis thaliana GN=RAP74 PE=1 SV=1	K	Transcription	PREDICTED: transcription initiation factor IIF subunit alpha-like [Malus domestica]
MD08G1097400	--	--	Molecular Function: metal ion binding (GO:0046872);;	K10635|0|mdm:103441105|E3 ubiquitin-protein ligase arkadia-like; K10635 E3 ubiquitin-protein ligase Arkadia [EC:6.3.2.19] (A)	[O]	Posttranslational modification, protein turnover, chaperones	Probable E3 ubiquitin-protein ligase RHG1A OS=Arabidopsis thaliana GN=RHG1A PE=2 SV=1	O	Posttranslational modification, protein turnover, chaperones	PREDICTED: probable E3 ubiquitin-protein ligase RHG1A isoform X2 [Malus domestica]
MD00G1085100	[F]	Nucleotide transport and metabolism	--	K01937|0|pxb:103953284|CTP synthase-like; K01937 CTP synthase [EC:6.3.4.2] (A)	[F]	Nucleotide transport and metabolism	--	F	Nucleotide transport and metabolism	PREDICTED: CTP synthase-like [Pyrus x bretschneideri]
MD05G1058800	--	--	Biological Process: proteolysis (GO:0006508);; Molecular Function: cysteine-type peptidase activity (GO:0008234);;	K01373|0|mdm:103445116|cysteine proteinase RD19a; K01373 cathepsin F [EC:3.4.22.41] (A)	[O]	Posttranslational modification, protein turnover, chaperones	Cysteine protease RD19A OS=Arabidopsis thaliana GN=RD19A PE=1 SV=1	O	Posttranslational modification, protein turnover, chaperones	PREDICTED: cysteine protease RD19A [Malus domestica]
MD13G1131800	[E]	Amino acid transport and metabolism	--	--	[E]	Amino acid transport and metabolism	Protein NRT1/ PTR FAMILY 6.1 OS=Arabidopsis thaliana GN=NPF6.1 PE=2 SV=1	E	Amino acid transport and metabolism	PREDICTED: protein NRT1/ PTR FAMILY 6.1-like [Malus domestica]
MD15G1143600	--	--	--	--	[U]	Intracellular trafficking, secretion, and vesicular transport	Type I inositol polyphosphate 5-phosphatase 12 OS=Arabidopsis thaliana GN=IP5P12 PE=1 SV=2	T	Signal transduction mechanisms	PREDICTED: type I inositol polyphosphate 5-phosphatase 12-like isoform X2 [Pyrus x bretschneideri]
MD05G1066000	--	--	--	K15032|0|mdm:103430817|uncharacterized LOC103430817; K15032 mTERF domain-containing protein, mitochondrial (A)	[KR]	--	Transcription termination factor MTERF2, chloroplastic OS=Arabidopsis thaliana GN=MTERF2 PE=3 SV=1	S	Function unknown	PREDICTED: transcription termination factor MTERF2, chloroplastic-like [Malus domestica]
MD15G1434000	--	--	--	--	[S]	Function unknown	Uncharacterized protein At5g49945 OS=Arabidopsis thaliana GN=At5g49945 PE=2 SV=1	S	Function unknown	PREDICTED: uncharacterized protein At5g49945-like [Malus domestica]
MD14G1134300	--	--	Molecular Function: transporter activity (GO:0005215);; Molecular Function: ATP binding (GO:0005524);; Cellular Component: cytosol (GO:0005829);; Biological Process: gluconeogenesis (GO:0006094);; Biological Process: glycolytic process (GO:0006096);; Biological Process: ATP catabolic process (GO:0006200);; Biological Process: mRNA export from nucleus (GO:0006406);; Biological Process: protein imp…	K06158|0|mdm:103452587|ABC transporter F family member 3-like; K06158 ATP-binding cassette, subfamily F, member 3 (A)	[EJ]	--	ABC transporter F family member 3 OS=Arabidopsis thaliana GN=ABCF3 PE=1 SV=1	S	Function unknown	PREDICTED: ABC transporter F family member 3-like [Pyrus x bretschneideri]
MD02G1267400	--	--	--	--	[O]	Posttranslational modification, protein turnover, chaperones	Ubiquitin carboxyl-terminal hydrolase 12 OS=Arabidopsis thaliana GN=UBP12 PE=2 SV=2	O	Posttranslational modification, protein turnover, chaperones	PREDICTED: MATH domain and coiled-coil domain-containing protein At3g58370-like [Malus domestica]
MD14G1210400	--	--	--	--	--	--	--	S	Function unknown	PREDICTED: uncharacterized protein LOC103424558 [Malus domestica]
MD14G1231500	[O]	Posttranslational modification, protein turnover, chaperones	Molecular Function: ATP binding (GO:0005524);; Cellular Component: cytoplasm (GO:0005737);; Biological Process: protein folding (GO:0006457);; Molecular Function: unfolded protein binding (GO:0051082);;	K09496|0|mdm:103424774|T-complex protein 1 subunit delta-like; K09496 T-complex protein 1 subunit delta (A)	[O]	Posttranslational modification, protein turnover, chaperones	T-complex protein 1 subunit delta OS=Arabidopsis thaliana GN=CCT4 PE=1 SV=1	O	Posttranslational modification, protein turnover, chaperones	T-complex protein 1 subunit delta [Malus domestica]
MD15G1276200	--	--	--	--	[S]	Function unknown	Autophagy-related protein 101 OS=Arabidopsis thaliana GN=ATG101 PE=1 SV=1	S	Function unknown	PREDICTED: autophagy-related protein 101-like [Malus domestica]
MD15G1223800	--	--	Molecular Function: phosphoric ester hydrolase activity (GO:0042578);;	--	[I]	Lipid transport and metabolism	Phosphoinositide phosphatase SAC3 OS=Arabidopsis thaliana GN=SAC3 PE=2 SV=1	T	Signal transduction mechanisms	PREDICTED: phosphoinositide phosphatase SAC3 [Malus domestica]
MD07G1286900	--	--	--	--	--	--	Uncharacterized protein At4g00950 OS=Arabidopsis thaliana GN=At4g00950 PE=2 SV=1	S	Function unknown	PREDICTED: uncharacterized protein At4g00950-like [Malus domestica]
MD07G1005600	--	--	--	--	--	--	--	S	Function unknown	PREDICTED: uncharacterized protein LOC103420438 [Malus domestica]
MD03G1103300	[K]	Transcription	--	K12605|0|mdm:103421615|probable NOT transcription complex subunit VIP2; K12605 CCR4-NOT transcription complex subunit 2 (A)	[KDR]	--	Probable NOT transcription complex subunit VIP2 (Fragment) OS=Nicotiana benthamiana GN=VIP2 PE=1 SV=1	K	Transcription	PREDICTED: probable NOT transcription complex subunit VIP2 isoform X2 [Malus domestica]
MD05G1192500	--	--	Molecular Function: Rho GDP-dissociation inhibitor activity (GO:0005094);; Cellular Component: cytoplasm (GO:0005737);;	K12462|9.62974e-155|mdm:103419930|rho GDP-dissociation inhibitor 1-like; K12462 Rho GDP-dissociation inhibitor (A)	[T]	Signal transduction mechanisms	Rho GDP-dissociation inhibitor 1 OS=Arabidopsis thaliana GN=GDI1 PE=1 SV=1	O	Posttranslational modification, protein turnover, chaperones	PREDICTED: rho GDP-dissociation inhibitor 1-like [Malus domestica]
MD15G1381000	[RTKL]	--	--	--	[T]	Signal transduction mechanisms	Serine/threonine-protein kinase-like protein At1g28390 OS=Arabidopsis thaliana GN=At1g28390 PE=2 SV=1	T	Signal transduction mechanisms	PREDICTED: serine/threonine-protein kinase-like protein At1g28390 [Malus domestica]
MD08G1002600	--	--	--	--	--	--	--	S	Function unknown	PREDICTED: uncharacterized protein LOC103440179 [Malus domestica]
MD08G1236100	--	--	--	--	[T]	Signal transduction mechanisms	--	S	Function unknown	PREDICTED: uncharacterized protein LOC103441936 [Malus domestica]
MD06G1015700	[J]	Translation, ribosomal structure and biogenesis	Molecular Function: RNA binding (GO:0003723);; Molecular Function: structural constituent of ribosome (GO:0003735);; Cellular Component: endosome (GO:0005768);; Cellular Component: Golgi apparatus (GO:0005794);; Cellular Component: trans-Golgi network (GO:0005802);; Cellular Component: ribosome (GO:0005840);; Biological Process: translation (GO:0006412);; Biological Process: pyrimidine ribonucleo…	K02988|0|mdm:103424423|uncharacterized LOC103424423; K02988 small subunit ribosomal protein S5 (A)	[J]	Translation, ribosomal structure and biogenesis	30S ribosomal protein S5, chloroplastic OS=Rhodomonas salina GN=rps5 PE=3 SV=1	J	Translation, ribosomal structure and biogenesis	PREDICTED: uncharacterized protein LOC103424423 [Malus domestica]
MD17G1077800	--	--	--	--	[R]	General function prediction only	--	S	Function unknown	PREDICTED: uncharacterized protein LOC103404720 isoform X1 [Malus domestica]
MD15G1335500	[E]	Amino acid transport and metabolism	--	K13832|0|mdm:103436731|bifunctional 3-dehydroquinate dehydratase/shikimate dehydrogenase, chloroplastic-like; K13832 3-dehydroquinate dehydratase / shikimate dehydrogenase [EC:4.2.1.10 1.1.1.25] (A)	[E]	Amino acid transport and metabolism	Bifunctional 3-dehydroquinate dehydratase/shikimate dehydrogenase, chloroplastic OS=Arabidopsis thaliana GN=EMB3004 PE=1 SV=1	E	Amino acid transport and metabolism	PREDICTED: bifunctional 3-dehydroquinate dehydratase/shikimate dehydrogenase, chloroplastic-like [Malus domestica]
MD02G1265200	--	--	--	--	--	--	--	S	Function unknown	PREDICTED: uncharacterized protein LOC103946145 [Pyrus x bretschneideri]
MD12G1078600	--	--	--	--	[G]	Carbohydrate transport and metabolism	Beta-glucuronosyltransferase GlcAT14C OS=Arabidopsis thaliana GN=GLCAT14C PE=2 SV=1	S	Function unknown	PREDICTED: beta-glucuronosyltransferase GlcAT14C-like isoform X1 [Pyrus x bretschneideri]
MD01G1071200	--	--	Cellular Component: exocyst (GO:0000145);; Cellular Component: plasma membrane (GO:0005886);; Biological Process: exocytosis (GO:0006887);; Biological Process: actin filament organization (GO:0007015);; Cellular Component: plasmodesma (GO:0009506);; Biological Process: vesicle docking (GO:0048278);;	--	[U]	Intracellular trafficking, secretion, and vesicular transport	Exocyst complex component SEC10b OS=Arabidopsis thaliana GN=SEC10b PE=1 SV=1	U	Intracellular trafficking, secretion, and vesicular transport	PREDICTED: exocyst complex component SEC10-like [Pyrus x bretschneideri]
MD03G1224000	--	--	--	K14820|0|pxb:103935531|ribosome biogenesis protein BRX1-like; K14820 ribosome biogenesis protein BRX1 (A)	[J]	Translation, ribosomal structure and biogenesis	Ribosome biogenesis protein BRX1 homolog 1 OS=Arabidopsis thaliana GN=BRIX1-1 PE=2 SV=1	J	Translation, ribosomal structure and biogenesis	PREDICTED: ribosome biogenesis protein BRX1-like [Pyrus x bretschneideri]
MD03G1158600	--	--	Molecular Function: acetylglucosaminyltransferase activity (GO:0008375);; Cellular Component: membrane (GO:0016020);;	--	--	--	--	S	Function unknown	PREDICTED: uncharacterized protein LOC103407859 [Malus domestica]
MD10G1311700	--	--	Molecular Function: calcium ion binding (GO:0005509);; Cellular Component: photosystem II oxygen evolving complex (GO:0009654);; Biological Process: photosynthesis (GO:0015979);; Cellular Component: extrinsic component of membrane (GO:0019898);;	K08901|5.23555e-97|pxb:103956260|oxygen-evolving enhancer protein 3-2, chloroplastic; K08901 photosystem II oxygen-evolving enhancer protein 3 (A)	--	--	Oxygen-evolving enhancer protein 3, chloroplastic OS=Spinacia oleracea GN=PSBQ PE=1 SV=1	S	Function unknown	PREDICTED: oxygen-evolving enhancer protein 3-2, chloroplastic [Pyrus x bretschneideri]
MD15G1171000	--	--	--	--	--	--	Methyl-CpG-binding domain-containing protein 10 OS=Arabidopsis thaliana GN=MBD10 PE=1 SV=1	S	Function unknown	PREDICTED: methyl-CpG-binding domain-containing protein 11-like [Malus domestica]
MD17G1213700	[U]	Intracellular trafficking, secretion, and vesicular transport	Molecular Function: GTPase activity (GO:0003924);; Molecular Function: GTP binding (GO:0005525);; Biological Process: GTP catabolic process (GO:0006184);; Biological Process: SRP-dependent cotranslational protein targeting to membrane (GO:0006614);; Molecular Function: 7S RNA binding (GO:0008312);; Cellular Component: signal recognition particle (GO:0048500);;	K03106|0|mdm:103437288|signal recognition particle 54 kDa protein 2; K03106 signal recognition particle subunit SRP54 (A)	[U]	Intracellular trafficking, secretion, and vesicular transport	Signal recognition particle 54 kDa protein 2 OS=Solanum lycopersicum PE=2 SV=1	U	Intracellular trafficking, secretion, and vesicular transport	PREDICTED: signal recognition particle 54 kDa protein 2 [Malus domestica]
MD09G1267600	--	--	--	--	--	--	Late embryogenesis abundant protein ECP63 OS=Arabidopsis thaliana GN=ECP63 PE=2 SV=1	S	Function unknown	PREDICTED: embryonic protein DC-8-like isoform X1 [Malus domestica]
MD03G1103200	--	--	Biological Process: glucuronoxylan metabolic process (GO:0010413);; Biological Process: xylan biosynthetic process (GO:0045492);;	--	[S]	Function unknown	E3 UFM1-protein ligase 1 homolog OS=Arabidopsis thaliana GN=At3g46220 PE=1 SV=1	O	Posttranslational modification, protein turnover, chaperones	PREDICTED: E3 UFM1-protein ligase 1 homolog [Malus domestica]
MD08G1113400	--	--	Molecular Function: metal ion binding (GO:0046872);;	--	--	--	--	S	Function unknown	PREDICTED: mitogen-activated protein kinase kinase kinase 1 [Malus domestica]
MD15G1042300	--	--	--	K12842|0|pxb:103949714|U2 snRNP-associated SURP motif-containing protein-like; K12842 U2-associated protein SR140 (A)	[R]	General function prediction only	Protein RRC1 OS=Arabidopsis thaliana GN=RRC1 PE=1 SV=1	S	Function unknown	PREDICTED: protein RRC1-like isoform X4 [Malus domestica]
MD12G1206600	--	--	Molecular Function: inorganic diphosphatase activity (GO:0004427);; Molecular Function: hydrogen-translocating pyrophosphatase activity (GO:0009678);; Biological Process: proton transport (GO:0015992);; Cellular Component: membrane (GO:0016020);; Molecular Function: 2-alkenal reductase [NAD(P)] activity (GO:0032440);; Biological Process: oxidation-reduction process (GO:0055114);;	K01507|0|mdm:103423547|pyrophosphate-energized vacuolar membrane proton pump 1; K01507 inorganic pyrophosphatase [EC:3.6.1.1] (A)	--	--	Pyrophosphate-energized vacuolar membrane proton pump 1 OS=Arabidopsis thaliana GN=AVP1 PE=1 SV=1	C	Energy production and conversion	PREDICTED: pyrophosphate-energized vacuolar membrane proton pump 1 [Malus domestica]
MD15G1323700	[R]	General function prediction only	Molecular Function: GTP binding (GO:0005525);; Cellular Component: mitochondrion (GO:0005739);; Biological Process: small GTPase mediated signal transduction (GO:0007264);; Biological Process: protein transport (GO:0015031);;	K07893|2.15691e-150|pxb:103932608|ras-related protein RABH1e; K07893 Ras-related protein Rab-6A (A)	[U]	Intracellular trafficking, secretion, and vesicular transport	Ras-related protein RABH1e OS=Arabidopsis thaliana GN=RABH1E PE=2 SV=1	S	Function unknown	PREDICTED: ras-related protein RABH1e [Pyrus x bretschneideri]
MD13G1027300	[V]	Defense mechanisms	Molecular Function: ATP binding (GO:0005524);; Biological Process: ATP catabolic process (GO:0006200);; Cellular Component: chloroplast envelope (GO:0009941);; Cellular Component: membrane (GO:0016020);; Molecular Function: ATPase activity, coupled to transmembrane movement of substances (GO:0042626);;	--	[Q]	Secondary metabolites biosynthesis, transport and catabolism	ABC transporter G family member 7 OS=Arabidopsis thaliana GN=ABCG7 PE=2 SV=1	V	Defense mechanisms	PREDICTED: ABC transporter G family member 7 [Malus domestica]
MD11G1237500	[U]	Intracellular trafficking, secretion, and vesicular transport	Biological Process: regulation of ARF GTPase activity (GO:0032312);; Cellular Component: intracellular membrane-bounded organelle (GO:0043231);; Cellular Component: cytoplasmic part (GO:0044444);; Molecular Function: metal ion binding (GO:0046872);;	K12486|0|pxb:103934428|probable ADP-ribosylation factor GTPase-activating protein AGD5; K12486 stromal membrane-associated protein (A)	[T]	Signal transduction mechanisms	Probable ADP-ribosylation factor GTPase-activating protein AGD5 OS=Arabidopsis thaliana GN=AGD5 PE=1 SV=1	U	Intracellular trafficking, secretion, and vesicular transport	PREDICTED: probable ADP-ribosylation factor GTPase-activating protein AGD5 [Pyrus x bretschneideri]
MD08G1230300	[T]	Signal transduction mechanisms	--	K00889|0|mdm:103441898|phosphatidylinositol 4-phosphate 5-kinase 8-like; K00889 1-phosphatidylinositol-4-phosphate 5-kinase [EC:2.7.1.68] (A)	[T]	Signal transduction mechanisms	Phosphatidylinositol 4-phosphate 5-kinase 8 OS=Arabidopsis thaliana GN=PIP5K8 PE=1 SV=1	T	Signal transduction mechanisms	PREDICTED: phosphatidylinositol 4-phosphate 5-kinase 8-like isoform X1 [Pyrus x bretschneideri]
MD10G1286100	--	--	Biological Process: very long-chain fatty acid metabolic process (GO:0000038);; Molecular Function: carboxylic ester hydrolase activity (GO:0004091);; Biological Process: cuticle development (GO:0042335);;	--	--	--	GDSL esterase/lipase At5g45950 OS=Arabidopsis thaliana GN=At5g45950 PE=2 SV=1	S	Function unknown	PREDICTED: GDSL esterase/lipase At5g45950-like [Malus domestica]
MD12G1046400	--	--	--	--	--	--	Myosin-binding protein 7 OS=Arabidopsis thaliana GN=MYOB7 PE=1 SV=1	S	Function unknown	PREDICTED: myosin-binding protein 7 [Malus domestica]
MD13G1185200	--	--	Molecular Function: sequence-specific DNA binding transcription factor activity (GO:0003700);; Biological Process: regulation of transcription, DNA-templated (GO:0006355);; Cellular Component: CCAAT-binding factor complex (GO:0016602);; Molecular Function: sequence-specific DNA binding (GO:0043565);; Molecular Function: protein heterodimerization activity (GO:0046982);;	--	[K]	Transcription	Nuclear transcription factor Y subunit C-9 OS=Arabidopsis thaliana GN=NFYC9 PE=1 SV=1	K	Transcription	PREDICTED: nuclear transcription factor Y subunit C-3-like [Malus domestica]
MD14G1148700	[O]	Posttranslational modification, protein turnover, chaperones	--	K03696|0|mdm:103454896|ATP-dependent Clp protease ATP-binding subunit clpA homolog CD4B, chloroplastic; K03696 ATP-dependent Clp protease ATP-binding subunit ClpC (A)	[O]	Posttranslational modification, protein turnover, chaperones	Chaperone protein ClpC, chloroplastic OS=Pisum sativum PE=2 SV=1	O	Posttranslational modification, protein turnover, chaperones	PREDICTED: ATP-dependent Clp protease ATP-binding subunit ClpA homolog CD4B, chloroplastic [Malus domestica]
MD10G1300600	[RTKL]	--	--	--	--	--	Protein STRUBBELIG-RECEPTOR FAMILY 1 OS=Arabidopsis thaliana GN=SRF1 PE=2 SV=2	T	Signal transduction mechanisms	PREDICTED: protein STRUBBELIG-RECEPTOR FAMILY 3-like [Malus domestica]
MD05G1004100	[L]	Replication, recombination and repair	--	--	--	--	Transcriptional activator DEMETER OS=Arabidopsis thaliana GN=DME PE=1 SV=2	L	Replication, recombination and repair	PREDICTED: DEMETER-like protein 2 [Malus domestica]
MD01G1028300	[R]	General function prediction only	--	--	--	--	Hsp70-Hsp90 organizing protein 1 OS=Arabidopsis thaliana GN=HOP1 PE=2 SV=1	S	Function unknown	PREDICTED: uncharacterized protein LOC103932141 isoform X1 [Pyrus x bretschneideri]
MD17G1259300	[R]	General function prediction only	--	K08869|0|mdm:103427683|uncharacterized aarF domain-containing protein kinase At5g05200, chloroplastic-like; K08869 aarF domain-containing kinase (A)	[R]	General function prediction only	Uncharacterized aarF domain-containing protein kinase At5g05200, chloroplastic OS=Arabidopsis thaliana GN=At5g05200 PE=2 SV=1	S	Function unknown	PREDICTED: uncharacterized protein slr0889-like [Malus domestica]
MD17G1152400	--	--	Molecular Function: DNA binding (GO:0003677);; Molecular Function: sequence-specific DNA binding transcription factor activity (GO:0003700);; Cellular Component: nucleus (GO:0005634);; Biological Process: regulation of transcription, DNA-templated (GO:0006355);;	K09286|0|mdm:103403137|AP2D11; ethylene-responsive transcription factor RAP2-12-like; K09286 EREBP-like factor (A)	--	--	Ethylene-responsive transcription factor RAP2-12 OS=Arabidopsis thaliana GN=RAP2-12 PE=1 SV=1	K	Transcription	ethylene-responsive transcription factor RAP2-12-like [Malus domestica]
MD03G1250300	[G]	Carbohydrate transport and metabolism	--	K16055|0|mdm:103431945|alpha,alpha-trehalose-phosphate synthase [UDP-forming] 1-like; K16055 trehalose 6-phosphate synthase/phosphatase [EC:2.4.1.15 3.1.3.12] (A)	[G]	Carbohydrate transport and metabolism	Alpha,alpha-trehalose-phosphate synthase [UDP-forming] 1 OS=Arabidopsis thaliana GN=TPS1 PE=1 SV=1	G	Carbohydrate transport and metabolism	PREDICTED: alpha,alpha-trehalose-phosphate synthase [UDP-forming] 1-like isoform X1 [Malus domestica]
MD10G1223800	[RTKL]	--	Molecular Function: protein serine/threonine kinase activity (GO:0004674);; Molecular Function: ATP binding (GO:0005524);; Biological Process: protein phosphorylation (GO:0006468);; Cellular Component: integral component of membrane (GO:0016021);;	--	--	--	Leucine-rich repeat receptor-like serine/threonine-protein kinase BAM3 OS=Arabidopsis thaliana GN=BAM3 PE=2 SV=3	S	Function unknown	PREDICTED: leucine-rich repeat receptor-like serine/threonine-protein kinase BAM3 [Malus domestica]
MD06G1014600	--	--	--	--	--	--	Cadmium-induced protein AS8 OS=Arabidopsis thaliana GN=At4g19070 PE=2 SV=1	S	Function unknown	PREDICTED: cadmium-induced protein AS8-like [Malus domestica]
MD09G1088000	--	--	--	--	[R]	General function prediction only	--	S	Function unknown	PREDICTED: uncharacterized protein LOC103947825 [Pyrus x bretschneideri]
MD16G1265000	--	--	Cellular Component: intracellular (GO:0005622);; Molecular Function: zinc ion binding (GO:0008270);;	--	[K]	Transcription	Zinc finger protein CONSTANS-LIKE 5 OS=Arabidopsis thaliana GN=COL5 PE=2 SV=2	K	Transcription	PREDICTED: zinc finger protein CONSTANS-LIKE 5 isoform X1 [Malus domestica]
MD08G1242200	--	--	--	--	--	--	MACPF domain-containing protein At4g24290 OS=Arabidopsis thaliana GN=At4g24290 PE=2 SV=1	S	Function unknown	PREDICTED: MACPF domain-containing protein At4g24290-like isoform X2 [Malus domestica]
MD03G1165200	--	--	--	--	--	--	Protein CLT3, chloroplastic OS=Arabidopsis thaliana GN=CLT3 PE=2 SV=1	S	Function unknown	PREDICTED: protein CLT1, chloroplastic-like [Pyrus x bretschneideri]
MD06G1121900	[O]	Posttranslational modification, protein turnover, chaperones	Molecular Function: ubiquitin thiolesterase activity (GO:0004221);; Biological Process: ubiquitin-dependent protein catabolic process (GO:0006511);; Molecular Function: cysteine-type peptidase activity (GO:0008234);;	K11835|0|mdm:103437445|ubiquitin carboxyl-terminal hydrolase 9-like; K11835 ubiquitin carboxyl-terminal hydrolase 4/11/15 [EC:3.4.19.12] (A)	[O]	Posttranslational modification, protein turnover, chaperones	Ubiquitin carboxyl-terminal hydrolase 9 OS=Arabidopsis thaliana GN=UBP9 PE=2 SV=1	O	Posttranslational modification, protein turnover, chaperones	PREDICTED: ubiquitin carboxyl-terminal hydrolase 9-like [Malus domestica]
MD08G1248400	[O]	Posttranslational modification, protein turnover, chaperones	--	K03544|0|pxb:103946410|ATP-dependent Clp protease ATP-binding subunit clpX-like, mitochondrial; K03544 ATP-dependent Clp protease ATP-binding subunit ClpX (A)	[O]	Posttranslational modification, protein turnover, chaperones	CLP protease regulatory subunit CLPX2, mitochondrial OS=Arabidopsis thaliana GN=CLPX2 PE=3 SV=1	O	Posttranslational modification, protein turnover, chaperones	PREDICTED: CLP protease regulatory subunit CLPX2, mitochondrial [Pyrus x bretschneideri]
MD09G1075900	--	--	--	--	--	--	Transcription factor BIM2 OS=Arabidopsis thaliana GN=BIM2 PE=1 SV=1	K	Transcription	PREDICTED: transcription factor BIM2-like [Malus domestica]
MD15G1146400	--	--	Molecular Function: calcium ion binding (GO:0005509);;	K17800|0|mdm:103446648|LETM1 and EF-hand domain-containing protein 1, mitochondrial; K17800 LETM1 and EF-hand domain-containing protein 1, mitochondrial (A)	[S]	Function unknown	--	S	Function unknown	PREDICTED: LETM1 and EF-hand domain-containing protein 1, mitochondrial isoform X1 [Malus domestica]
MD17G1241700	[O]	Posttranslational modification, protein turnover, chaperones	--	K14571|0|mdm:103405666|cell division control protein 48 homolog C-like; K14571 ribosome biogenesis ATPase (A)	[O]	Posttranslational modification, protein turnover, chaperones	Cell division control protein 48 homolog C OS=Arabidopsis thaliana GN=CDC48C PE=2 SV=2	O	Posttranslational modification, protein turnover, chaperones	PREDICTED: cell division control protein 48 homolog C-like isoform X1 [Pyrus x bretschneideri]
MD13G1162100	[R]	General function prediction only	--	--	[R]	General function prediction only	Topless-related protein 2 OS=Arabidopsis thaliana GN=TPR2 PE=1 SV=2	K	Transcription	PREDICTED: topless-related protein 2-like [Malus domestica]
MD17G1051900	[E]	Amino acid transport and metabolism	Molecular Function: catalytic activity (GO:0003824);; Biological Process: metabolic process (GO:0008152);; Molecular Function: pyridoxal phosphate binding (GO:0030170);;	K01739|0|mdm:103432045|cystathionine gamma-synthase, chloroplastic-like; K01739 cystathionine gamma-synthase [EC:2.5.1.48] (A)	[E]	Amino acid transport and metabolism	Cystathionine gamma-synthase 1, chloroplastic OS=Arabidopsis thaliana GN=CGS1 PE=1 SV=3	E	Amino acid transport and metabolism	PREDICTED: cystathionine gamma-synthase 1, chloroplastic-like [Malus domestica]
MD03G1244400	--	--	--	--	[S]	Function unknown	--	O	Posttranslational modification, protein turnover, chaperones	hypothetical protein CISIN_1g033388mg [Citrus sinensis]
MD05G1199700	--	--	--	K10727|0|pxb:103946036|CDT1-like protein a, chloroplastic; K10727 chromatin licensing and DNA replication factor 1 (A)	[L]	Replication, recombination and repair	CDT1-like protein a, chloroplastic OS=Arabidopsis thaliana GN=CDT1A PE=1 SV=1	L	Replication, recombination and repair	PREDICTED: CDT1-like protein a, chloroplastic [Pyrus x bretschneideri]
MD05G1122800	--	--	--	--	--	--	--	S	Function unknown	PREDICTED: uncharacterized protein LOC103410604 [Malus domestica]
MD11G1200600	--	--	--	K17046|1.36717e-168|pxb:103946257|DNA ligase 1-like; K17046 protein DEK (A)	[B]	Chromatin structure and dynamics	--	S	Function unknown	PREDICTED: DNA ligase 1-like [Pyrus x bretschneideri]
MD13G1078100	--	--	Molecular Function: nucleic acid binding (GO:0003676);; Molecular Function: zinc ion binding (GO:0008270);; Molecular Function: heat shock protein binding (GO:0031072);; Molecular Function: unfolded protein binding (GO:0051082);;	--	--	--	--	S	Function unknown	PREDICTED: uncharacterized protein LOC103950864 isoform X2 [Pyrus x bretschneideri]
MD17G1157000	--	--	--	--	[K]	Transcription	Histone acetyltransferase HAC12 OS=Arabidopsis thaliana GN=HAC12 PE=3 SV=2	B	Chromatin structure and dynamics	PREDICTED: histone acetyltransferase HAC1-like [Malus domestica]
MD01G1218500	--	--	Molecular Function: metal ion binding (GO:0046872);;	K15601|0|mdm:103443682|uncharacterized LOC103443682; K15601 lysine-specific demethylase 3 [EC:1.14.11.-] (A)	[K]	Transcription	Lysine-specific demethylase JMJ25 OS=Arabidopsis thaliana GN=JMJ25 PE=1 SV=1	S	Function unknown	PREDICTED: uncharacterized protein LOC103443682 [Malus domestica]
MD15G1139900	[RTKL]	--	--	--	--	--	Probable LRR receptor-like serine/threonine-protein kinase At5g63710 OS=Arabidopsis thaliana GN=At5g63710 PE=2 SV=1	T	Signal transduction mechanisms	PREDICTED: LOW QUALITY PROTEIN: probable LRR receptor-like serine/threonine-protein kinase At5g63710 [Malus domestica]
MD12G1181800	--	--	--	--	--	--	Protein SCAR2 OS=Arabidopsis thaliana GN=SCAR2 PE=1 SV=1	S	Function unknown	PREDICTED: protein SCAR2-like isoform X2 [Malus domestica]
MD17G1264400	[M]	Cell wall/membrane/envelope biogenesis	--	--	--	--	--	S	Function unknown	PREDICTED: probable endopeptidase p60 [Malus domestica]
MD00G1066300	--	--	Molecular Function: nucleotide binding (GO:0000166);; Molecular Function: RNA binding (GO:0003723);; Cellular Component: nucleus (GO:0005634);; Biological Process: mRNA processing (GO:0006397);;	K14948|0|mdm:103447022|polypyrimidine tract-binding protein homolog 3-like; K14948 polypyrimidine tract-binding protein 2 (A)	[A]	RNA processing and modification	Polypyrimidine tract-binding protein homolog 3 OS=Arabidopsis thaliana GN=At1g43190 PE=2 SV=1	S	Function unknown	PREDICTED: polypyrimidine tract-binding protein homolog 3 [Malus domestica]
MD10G1007800	[LKJ]	--	Molecular Function: nucleic acid binding (GO:0003676);; Molecular Function: RNA helicase activity (GO:0003724);; Molecular Function: ATP binding (GO:0005524);; Cellular Component: mitochondrion (GO:0005739);; Molecular Function: ATP-dependent helicase activity (GO:0008026);; Biological Process: plasmodesma organization (GO:0009663);; Biological Process: embryo development ending in seed dormancy …	--	[J]	Translation, ribosomal structure and biogenesis	DEAD-box ATP-dependent RNA helicase 47B OS=Oryza sativa subsp. japonica GN=Os03g0219700 PE=2 SV=1	L	Replication, recombination and repair	PREDICTED: DEAD-box ATP-dependent RNA helicase 47B [Malus domestica]
MD10G1025600	--	--	Molecular Function: hydrolase activity (GO:0016787);;	--	[R]	General function prediction only	Tubby-like F-box protein 8 OS=Oryza sativa subsp. japonica GN=TULP8 PE=2 SV=1	S	Function unknown	PREDICTED: tubby-like F-box protein 8 [Pyrus x bretschneideri]
MD09G1196000	--	--	--	--	--	--	--	S	Function unknown	PREDICTED: dentin sialophosphoprotein-like [Malus domestica]
MD03G1055400	--	--	--	K15113|0|mdm:103418739|mitoferrin-like; K15113 solute carrier family 25 (mitochondrial iron transporter), member 28/37 (A)	[C]	Energy production and conversion	Probable S-adenosylmethionine carrier 2, chloroplastic OS=Arabidopsis thaliana GN=SAMC2 PE=2 SV=1	O	Posttranslational modification, protein turnover, chaperones	PREDICTED: mitoferrin-like [Malus domestica]
MD09G1027400	--	--	--	--	--	--	--	--	--	PREDICTED: LOW QUALITY PROTEIN: uncharacterized protein LOC103442693 [Malus domestica]
MD05G1268400	[C]	Energy production and conversion	Molecular Function: UDP-N-acetylmuramate dehydrogenase activity (GO:0008762);; Molecular Function: flavin adenine dinucleotide binding (GO:0050660);; Biological Process: oxidation-reduction process (GO:0055114);;	--	--	--	Berberine bridge enzyme-like 15 OS=Arabidopsis thaliana GN=MEE23 PE=1 SV=1	C	Energy production and conversion	PREDICTED: LOW QUALITY PROTEIN: flavin-dependent oxidoreductase FOX1-like [Malus domestica]
MD02G1218200	--	--	--	K10696|0|mdm:103428241|E3 ubiquitin-protein ligase BRE1-like 1; K10696 E3 ubiquitin-protein ligase BRE1 [EC:6.3.2.19] (A)	[O]	Posttranslational modification, protein turnover, chaperones	E3 ubiquitin-protein ligase BRE1-like 1 OS=Arabidopsis thaliana GN=HUB1 PE=1 SV=1	K	Transcription	PREDICTED: LOW QUALITY PROTEIN: E3 ubiquitin-protein ligase BRE1-like 1 [Malus domestica]
MD03G1109800	[C]	Energy production and conversion	Cellular Component: vacuolar proton-transporting V-type ATPase, V0 domain (GO:0000220);; Cellular Component: endosome (GO:0005768);; Cellular Component: trans-Golgi network (GO:0005802);; Biological Process: ATP catabolic process (GO:0006200);; Cellular Component: trans-Golgi network transport vesicle membrane (GO:0012510);; Molecular Function: hydrogen ion transmembrane transporter activity (GO:…	K02154|0|mdm:103421945|vacuolar proton ATPase a1; K02154 V-type H+-transporting ATPase subunit a (A)	[C]	Energy production and conversion	V-type proton ATPase subunit a1 OS=Arabidopsis thaliana GN=VHA-a1 PE=2 SV=1	C	Energy production and conversion	PREDICTED: V-type proton ATPase subunit a1 [Malus domestica]
MD06G1210000	--	--	Molecular Function: DNA binding (GO:0003677);; Molecular Function: protein dimerization activity (GO:0046983);;	--	[L]	Replication, recombination and repair	Zinc finger BED domain-containing protein RICESLEEPER 3 OS=Oryza sativa subsp. japonica GN=Os05g0583200 PE=2 SV=1	S	Function unknown	PREDICTED: zinc finger BED domain-containing protein DAYSLEEPER [Malus domestica]
MD03G1159500	--	--	--	--	--	--	--	S	Function unknown	PREDICTED: uncharacterized protein LOC103448122 isoform X2 [Malus domestica]
MD14G1097400	--	--	--	--	--	--	Uncharacterized protein At3g50808 OS=Arabidopsis thaliana GN=At3g50808 PE=4 SV=1	S	Function unknown	PREDICTED: uncharacterized protein LOC103454734 [Malus domestica]
MD03G1173900	[RTKL]	--	--	K13412|0|mdm:103402122|calcium-dependent protein kinase 8-like; K13412 calcium-dependent protein kinase [EC:2.7.11.1] (A)	[T]	Signal transduction mechanisms	Calcium-dependent protein kinase 8 OS=Arabidopsis thaliana GN=CPK8 PE=1 SV=1	T	Signal transduction mechanisms	PREDICTED: calcium-dependent protein kinase 8-like isoform X1 [Malus domestica]
Apple_newGene_45510	--	--	--	--	--	--	--	S	Function unknown	hypothetical protein AGABI2DRAFT_187811 [Agaricus bisporus var. bisporus H97]
MD04G1176200	[RTKL]	--	--	--	[R]	General function prediction only	Serine/threonine-protein kinase STN8, chloroplastic OS=Arabidopsis thaliana GN=STN8 PE=2 SV=1	T	Signal transduction mechanisms	PREDICTED: LOW QUALITY PROTEIN: serine/threonine-protein kinase STN8, chloroplastic [Malus domestica]
MD10G1100500	--	--	--	--	[R]	General function prediction only	Homeobox protein HAT3.1 OS=Arabidopsis thaliana GN=HAT3.1 PE=2 SV=3	S	Function unknown	PREDICTED: homeobox protein HAT3.1-like isoform X1 [Malus domestica]
MD11G1082500	[L]	Replication, recombination and repair	--	K12599|0|mdm:103447447|putative ATP-dependent RNA helicase C550.03c; K12599 antiviral helicase SKI2 [EC:3.6.4.-] (A)	[A]	RNA processing and modification	DExH-box ATP-dependent RNA helicase DExH11 OS=Arabidopsis thaliana GN=SKI2 PE=1 SV=1	L	Replication, recombination and repair	PREDICTED: DExH-box ATP-dependent RNA helicase DExH11-like isoform X1 [Malus domestica]
MD05G1021200	[RTKL]	--	Molecular Function: protein serine/threonine kinase activity (GO:0004674);; Molecular Function: protein tyrosine kinase activity (GO:0004713);; Molecular Function: ATP binding (GO:0005524);; Biological Process: protein phosphorylation (GO:0006468);; Molecular Function: amino acid binding (GO:0016597);;	--	[T]	Signal transduction mechanisms	Serine/threonine-protein kinase STY17 OS=Arabidopsis thaliana GN=STY17 PE=1 SV=1	T	Signal transduction mechanisms	PREDICTED: serine/threonine-protein kinase STY8-like isoform X1 [Malus domestica]
MD14G1213100	--	--	Biological Process: primary metabolic process (GO:0044238);; Biological Process: cellular macromolecule metabolic process (GO:0044260);;	--	--	--	Zinc finger CCCH domain-containing protein 38 OS=Arabidopsis thaliana GN=At3g18640 PE=2 SV=1	S	Function unknown	PREDICTED: uncharacterized protein LOC103424566 [Malus domestica]
MD07G1174700	[G]	Carbohydrate transport and metabolism	Molecular Function: transporter activity (GO:0005215);; Biological Process: transport (GO:0006810);; Cellular Component: integral component of membrane (GO:0016021);;	K09872|0|mdm:103428693|probable aquaporin PIP2-5; K09872 aquaporin PIP (A)	[G]	Carbohydrate transport and metabolism	Probable aquaporin PIP2-5 OS=Arabidopsis thaliana GN=PIP2-5 PE=1 SV=1	G	Carbohydrate transport and metabolism	PREDICTED: probable aquaporin PIP2-5 [Malus domestica]
MD05G1199600	--	--	--	K17907|0|pxb:103946037|autophagy-related protein 9-like; K17907 autophagy-related protein 9 (A)	[R]	General function prediction only	Autophagy-related protein 9 OS=Arabidopsis thaliana GN=ATG9 PE=2 SV=1	U	Intracellular trafficking, secretion, and vesicular transport	PREDICTED: autophagy-related protein 9-like [Pyrus x bretschneideri]
MD08G1089400	--	--	Molecular Function: aspartic-type endopeptidase activity (GO:0004190);; Cellular Component: endosome (GO:0005768);; Cellular Component: Golgi apparatus (GO:0005794);; Cellular Component: trans-Golgi network (GO:0005802);; Biological Process: proteolysis (GO:0006508);;	--	[O]	Posttranslational modification, protein turnover, chaperones	Aspartic proteinase-like protein 2 OS=Arabidopsis thaliana GN=At1g65240 PE=1 SV=2	O	Posttranslational modification, protein turnover, chaperones	PREDICTED: aspartic proteinase-like protein 2 [Malus domestica]
MD11G1184700	--	--	--	--	[T]	Signal transduction mechanisms	Rho GTPase-activating protein 7 OS=Arabidopsis thaliana GN=ROPGAP7 PE=2 SV=1	S	Function unknown	PREDICTED: rho GTPase-activating protein 7 isoform X3 [Malus domestica]
MD06G1034700	--	--	--	K11855|0|mdm:103436899|ubiquitin carboxyl-terminal hydrolase 20; K11855 ubiquitin carboxyl-terminal hydrolase 36/42 [EC:3.4.19.12] (A)	[O]	Posttranslational modification, protein turnover, chaperones	Ubiquitin carboxyl-terminal hydrolase 21 OS=Arabidopsis thaliana GN=UBP21 PE=2 SV=1	O	Posttranslational modification, protein turnover, chaperones	PREDICTED: ubiquitin carboxyl-terminal hydrolase 20 [Malus domestica]
MD16G1157500	[C]	Energy production and conversion	--	K00382|0|mdm:103403556|dihydrolipoyl dehydrogenase 2, chloroplastic; K00382 dihydrolipoamide dehydrogenase [EC:1.8.1.4] (A)	[C]	Energy production and conversion	Dihydrolipoyl dehydrogenase 2, chloroplastic OS=Arabidopsis thaliana GN=LPD2 PE=2 SV=2	C	Energy production and conversion	PREDICTED: dihydrolipoyl dehydrogenase 2, chloroplastic isoform X2 [Malus domestica]
MD11G1042100	[R]	General function prediction only	Molecular Function: nucleotide binding (GO:0000166);; Biological Process: production of ta-siRNAs involved in RNA interference (GO:0010267);; Cellular Component: Cul4-RING E3 ubiquitin ligase complex (GO:0080008);;	K12880|0|mdm:103412744|THO complex subunit 3; K12880 THO complex subunit 3 (A)	[S]	Function unknown	THO complex subunit 3 OS=Arabidopsis thaliana GN=THO3 PE=1 SV=1	S	Function unknown	PREDICTED: THO complex subunit 3 [Malus domestica]
MD07G1296100	--	--	Cellular Component: multivesicular body (GO:0005771);; Biological Process: vacuolar transport (GO:0007034);; Cellular Component: retromer complex (GO:0030904);;	K18466|0|mdm:103439913|vacuolar protein sorting-associated protein 26A; K18466 vacuolar protein sorting-associated protein 26 (A)	[U]	Intracellular trafficking, secretion, and vesicular transport	Vacuolar protein sorting-associated protein 26A OS=Arabidopsis thaliana GN=VPS26A PE=2 SV=1	U	Intracellular trafficking, secretion, and vesicular transport	PREDICTED: vacuolar protein sorting-associated protein 26A [Malus domestica]
MD13G1085000	--	--	--	--	--	--	Protein WVD2-like 7 OS=Arabidopsis thaliana GN=WDL7 PE=2 SV=1	S	Function unknown	PREDICTED: protein WVD2-like 7 [Malus domestica]
MD15G1372700	--	--	Cellular Component: cytosol (GO:0005829);; Biological Process: regulation of transcription, DNA-templated (GO:0006355);; Biological Process: cell surface receptor signaling pathway (GO:0007166);; Biological Process: response to chitin (GO:0010200);; Molecular Function: transferase activity, transferring glycosyl groups (GO:0016757);; Molecular Function: transferase activity, transferring phosphor…	--	[BT]	--	F-box protein At1g78280 OS=Arabidopsis thaliana GN=At1g78280 PE=2 SV=3	S	Function unknown	PREDICTED: F-box protein At1g78280-like [Malus domestica]
MD10G1228200	[E]	Amino acid transport and metabolism	--	K02083|0|mdm:103446000|allantoate deiminase; K02083 allantoate deiminase [EC:3.5.3.9] (A)	--	--	Allantoate deiminase 2 OS=Glycine max GN=AAH2 PE=1 SV=1	E	Amino acid transport and metabolism	PREDICTED: allantoate deiminase [Malus domestica]
MD10G1138300	[V]	Defense mechanisms	--	--	[R]	General function prediction only	Protein DETOXIFICATION 45, chloroplastic OS=Arabidopsis thaliana GN=DTX45 PE=2 SV=2	V	Defense mechanisms	PREDICTED: protein DETOXIFICATION 45, chloroplastic-like [Pyrus x bretschneideri]
MD09G1163300	--	--	Cellular Component: plasma membrane (GO:0005886);;	--	--	--	Uncharacterized membrane protein At1g16860 OS=Arabidopsis thaliana GN=At1g16860 PE=1 SV=1	S	Function unknown	PREDICTED: uncharacterized membrane protein At1g16860-like [Malus domestica]
MD03G1003500	--	--	--	--	--	--	--	S	Function unknown	PREDICTED: uncharacterized protein LOC103414791 [Malus domestica]
MD17G1042600	--	--	--	K11644|0|pxb:103928458|paired amphipathic helix protein Sin3-like 2; K11644 paired amphipathic helix protein Sin3a (A)	[B]	Chromatin structure and dynamics	Paired amphipathic helix protein Sin3-like 2 OS=Arabidopsis thaliana GN=SNL2 PE=1 SV=2	B	Chromatin structure and dynamics	PREDICTED: LOW QUALITY PROTEIN: paired amphipathic helix protein Sin3-like 2 [Pyrus x bretschneideri]
MD14G1117900	[G]	Carbohydrate transport and metabolism	Molecular Function: phosphogluconate dehydrogenase (decarboxylating) activity (GO:0004616);; Cellular Component: mitochondrion (GO:0005739);; Biological Process: pentose-phosphate shunt (GO:0006098);; Cellular Component: chloroplast (GO:0009507);; Biological Process: response to salt stress (GO:0009651);; Biological Process: response to sucrose (GO:0009744);; Biological Process: response to gluco…	K00033|0|pxb:103927289|6-phosphogluconate dehydrogenase, decarboxylating 2, chloroplastic-like; K00033 6-phosphogluconate dehydrogenase [EC:1.1.1.44 1.1.1.343] (A)	[G]	Carbohydrate transport and metabolism	6-phosphogluconate dehydrogenase, decarboxylating 2, chloroplastic OS=Arabidopsis thaliana GN=At5g41670 PE=1 SV=1	G	Carbohydrate transport and metabolism	PREDICTED: 6-phosphogluconate dehydrogenase, decarboxylating 2, chloroplastic [Pyrus x bretschneideri]
MD06G1042600	[L]	Replication, recombination and repair	--	K14326|0|mdm:103409468|regulator of nonsense transcripts 1 homolog; K14326 regulator of nonsense transcripts 1 [EC:3.6.4.-] (A)	[A]	RNA processing and modification	Regulator of nonsense transcripts 1 homolog OS=Arabidopsis thaliana GN=UPF1 PE=1 SV=2	L	Replication, recombination and repair	PREDICTED: regulator of nonsense transcripts 1 homolog isoform X1 [Malus domestica]
MD16G1219900	[R]	General function prediction only	Molecular Function: metal ion binding (GO:0046872);;	--	--	--	Probable E3 ubiquitin-protein ligase XBOS34 OS=Oryza sativa subsp. japonica GN=XBOS34 PE=2 SV=1	S	Function unknown	PREDICTED: putative E3 ubiquitin-protein ligase XBAT35 isoform X1 [Pyrus x bretschneideri]
MD15G1153000	--	--	--	--	--	--	Formin-like protein 13 OS=Arabidopsis thaliana GN=FH13 PE=2 SV=3	S	Function unknown	PREDICTED: formin-like protein 18 [Malus domestica]
MD15G1384500	--	--	Molecular Function: DNA binding (GO:0003677);; Molecular Function: sequence-specific DNA binding transcription factor activity (GO:0003700);; Cellular Component: nucleus (GO:0005634);; Biological Process: regulation of transcription, DNA-templated (GO:0006355);; Molecular Function: protein dimerization activity (GO:0046983);;	--	[K]	Transcription	MADS-box protein AGL24 OS=Arabidopsis thaliana GN=AGL24 PE=1 SV=1	K	Transcription	dormancy-associated MADS box 1 protein [Malus domestica]
MD10G1142100	[GEPR]	--	Biological Process: carbohydrate transport (GO:0008643);; Cellular Component: integral component of membrane (GO:0016021);; Molecular Function: substrate-specific transmembrane transporter activity (GO:0022891);; Molecular Function: 2-alkenal reductase [NAD(P)] activity (GO:0032440);; Biological Process: transmembrane transport (GO:0055085);; Biological Process: oxidation-reduction process (GO:00…	--	[R]	General function prediction only	Monosaccharide-sensing protein 2 OS=Arabidopsis thaliana GN=MSSP2 PE=1 SV=2	G	Carbohydrate transport and metabolism	PREDICTED: monosaccharide-sensing protein 2-like [Malus domestica]
MD15G1386100	[P]	Inorganic ion transport and metabolism	Molecular Function: NADPH-hemoprotein reductase activity (GO:0003958);; Molecular Function: iron ion binding (GO:0005506);; Cellular Component: endoplasmic reticulum membrane (GO:0005789);; Molecular Function: FMN binding (GO:0010181);; Biological Process: oxidation-reduction process (GO:0055114);;	K00327|0|mdm:103401995|NADPH--cytochrome P450 reductase; K00327 NADPH-ferrihemoprotein reductase [EC:1.6.2.4] (A)	[C]	Energy production and conversion	NADPH--cytochrome P450 reductase OS=Vigna radiata var. radiata PE=1 SV=1	P	Inorganic ion transport and metabolism	PREDICTED: NADPH--cytochrome P450 reductase [Malus domestica]
MD00G1148100	[G]	Carbohydrate transport and metabolism	Molecular Function: hydrolase activity, hydrolyzing O-glycosyl compounds (GO:0004553);; Biological Process: carbohydrate metabolic process (GO:0005975);; Molecular Function: carbohydrate binding (GO:0030246);;	K01187|0|pxb:103935166|neutral alpha-glucosidase C; K01187 alpha-glucosidase [EC:3.2.1.20] (A)	[GMO]	--	Probable glucan 1,3-alpha-glucosidase OS=Oryza sativa subsp. japonica GN=Os03g0216600 PE=3 SV=1	G	Carbohydrate transport and metabolism	PREDICTED: uncharacterized protein LOC103935166 [Pyrus x bretschneideri]
MD04G1216600	[J]	Translation, ribosomal structure and biogenesis	--	K14565|0|mdm:103434134|probable nucleolar protein 5-2; K14565 nucleolar protein 58 (A)	[AJ]	--	Probable nucleolar protein 5-2 OS=Arabidopsis thaliana GN=NOP5-2 PE=1 SV=1	J	Translation, ribosomal structure and biogenesis	PREDICTED: probable nucleolar protein 5-2 [Malus domestica]
MD08G1041700	--	--	Molecular Function: transporter activity (GO:0005215);; Cellular Component: membrane (GO:0016020);; Biological Process: transmembrane transport (GO:0055085);;	K14611|0|mdm:103440477|nucleobase-ascorbate transporter 3-like; K14611 solute carrier family 23 (nucleobase transporter), member 1/2 (A)	[F]	Nucleotide transport and metabolism	Nucleobase-ascorbate transporter 3 OS=Arabidopsis thaliana GN=NAT3 PE=2 SV=2	F	Nucleotide transport and metabolism	PREDICTED: nucleobase-ascorbate transporter 3-like [Malus domestica]
MD02G1189200	--	--	--	--	--	--	Putative phytosulfokines 4 OS=Arabidopsis thaliana GN=PSK4 PE=3 SV=1	S	Function unknown	PREDICTED: phytosulfokines 3 [Pyrus x bretschneideri]
MD13G1093300	[OC]	--	Molecular Function: isomerase activity (GO:0016853);; Biological Process: cell redox homeostasis (GO:0045454);; Molecular Function: protein-disulfide reductase activity (GO:0047134);; Biological Process: oxidation-reduction process (GO:0055114);;	K17609|0|mdm:103451976|probable nucleoredoxin 1; K17609 nucleoredoxin [EC:1.8.1.8] (A)	[R]	General function prediction only	Probable nucleoredoxin 1 OS=Arabidopsis thaliana GN=At1g60420 PE=1 SV=1	O	Posttranslational modification, protein turnover, chaperones	PREDICTED: probable nucleoredoxin 1 [Malus domestica]
MD11G1005100	[Z]	Cytoskeleton	Molecular Function: GTPase activity (GO:0003924);; Molecular Function: structural constituent of cytoskeleton (GO:0005200);; Molecular Function: GTP binding (GO:0005525);; Cellular Component: microtubule (GO:0005874);; Biological Process: GTP catabolic process (GO:0006184);; Biological Process: microtubule-based process (GO:0007017);; Biological Process: protein polymerization (GO:0051258);;	K07374|0|pxb:103931424|tubulin alpha-3 chain-like; K07374 tubulin alpha (A)	[Z]	Cytoskeleton	Tubulin alpha-5 chain OS=Arabidopsis thaliana GN=TUBA5 PE=1 SV=2	Z	Cytoskeleton	PREDICTED: tubulin alpha-3 chain [Malus domestica]
MD01G1165200	--	--	--	--	[L]	Replication, recombination and repair	--	L	Replication, recombination and repair	PREDICTED: uncharacterized protein LOC103437981 isoform X3 [Malus domestica]
MD13G1180700	[R]	General function prediction only	--	--	[R]	General function prediction only	--	S	Function unknown	PREDICTED: uncharacterized protein LOC103453051 [Malus domestica]
MD05G1135400	--	--	--	--	--	--	Protein EXORDIUM-like 5 OS=Arabidopsis thaliana GN=EXL5 PE=2 SV=1	S	Function unknown	PREDICTED: protein EXORDIUM-like 5 [Ricinus communis]
MD00G1181800	--	--	Biological Process: transport (GO:0006810);; Cellular Component: integral component of membrane (GO:0016021);;	K13354|0|pmum:103332446|peroxisomal nicotinamide adenine dinucleotide carrier-like; K13354 solute carrier family 25 (peroxisomal adenine nucleotide transporter), member 17 (A)	[C]	Energy production and conversion	Peroxisomal nicotinamide adenine dinucleotide carrier OS=Arabidopsis thaliana GN=PXN PE=1 SV=1	S	Function unknown	PREDICTED: peroxisomal nicotinamide adenine dinucleotide carrier-like [Pyrus x bretschneideri]
MD17G1010000	--	--	--	--	[S]	Function unknown	--	S	Function unknown	PREDICTED: uncharacterized protein LOC103404161 [Malus domestica]
MD01G1108500	[G]	Carbohydrate transport and metabolism	Molecular Function: transporter activity (GO:0005215);; Biological Process: transport (GO:0006810);; Cellular Component: integral component of membrane (GO:0016021);;	K09872|0|mdm:103431283|probable aquaporin PIP2-5; K09872 aquaporin PIP (A)	[G]	Carbohydrate transport and metabolism	Probable aquaporin PIP2-5 OS=Arabidopsis thaliana GN=PIP2-5 PE=1 SV=1	G	Carbohydrate transport and metabolism	PREDICTED: probable aquaporin PIP2-5 [Malus domestica]
MD14G1219700	--	--	--	K13123|0|pxb:103930029|G patch domain-containing protein 1; K13123 G patch domain-containing protein 1 (A)	[A]	RNA processing and modification	G patch domain-containing protein TGH OS=Arabidopsis thaliana GN=TGH PE=1 SV=1	S	Function unknown	PREDICTED: LOW QUALITY PROTEIN: G patch domain-containing protein TGH [Pyrus x bretschneideri]
MD05G1241100	[C]	Energy production and conversion	Molecular Function: magnesium ion binding (GO:0000287);; Molecular Function: isocitrate dehydrogenase (NADP+) activity (GO:0004450);; Biological Process: tricarboxylic acid cycle (GO:0006099);; Biological Process: isocitrate metabolic process (GO:0006102);; Molecular Function: NAD binding (GO:0051287);;	K00031|0|mdm:103435343|isocitrate dehydrogenase [NADP]-like; K00031 isocitrate dehydrogenase [EC:1.1.1.42] (A)	[C]	Energy production and conversion	Isocitrate dehydrogenase [NADP] OS=Nicotiana tabacum PE=2 SV=1	C	Energy production and conversion	PREDICTED: isocitrate dehydrogenase [NADP]-like isoform X2 [Malus domestica]
MD16G1033300	--	--	Cellular Component: cytosol (GO:0005829);; Cellular Component: plasmodesma (GO:0009506);;	K12200|0|mdm:103402624|ALG-2 interacting protein X; K12200 programmed cell death 6-interacting protein (A)	[R]	General function prediction only	--	S	Function unknown	PREDICTED: ALG-2 interacting protein X [Malus domestica]
MD13G1182100	--	--	--	--	--	--	Mediator of RNA polymerase II transcription subunit 33A OS=Arabidopsis thaliana GN=MED33A PE=1 SV=1	S	Function unknown	PREDICTED: mediator of RNA polymerase II transcription subunit 33A-like [Malus domestica]
MD11G1184200	[P]	Inorganic ion transport and metabolism	Molecular Function: isomerase activity (GO:0016853);;	--	[H]	Coenzyme transport and metabolism	Rhodanese-like/PpiC domain-containing protein 12, chloroplastic OS=Arabidopsis thaliana GN=At5g19370 PE=1 SV=1	O	Posttranslational modification, protein turnover, chaperones	PREDICTED: rhodanese-like/PpiC domain-containing protein 12, chloroplastic [Prunus mume]
MD07G1040400	--	--	--	--	--	--	--	S	Function unknown	PREDICTED: uncharacterized protein LOC108867585 [Pyrus x bretschneideri]
MD02G1069600	[S]	Function unknown	--	--	--	--	Putative disease resistance protein RGA4 OS=Solanum bulbocastanum GN=RGA4 PE=2 SV=1	S	Function unknown	PREDICTED: putative disease resistance protein RGA3 [Malus domestica]
MD09G1211800	--	--	--	--	--	--	--	S	Function unknown	PREDICTED: putative uncharacterized protein DDB_G0290521 [Malus domestica]
MD10G1120300	[J]	Translation, ribosomal structure and biogenesis	--	--	[J]	Translation, ribosomal structure and biogenesis	Glutamyl-tRNA(Gln) amidotransferase subunit A, chloroplastic/mitochondrial OS=Zea mays GN=GATA PE=2 SV=1	J	Translation, ribosomal structure and biogenesis	PREDICTED: putative amidase C869.01 isoform X1 [Malus domestica]
MD06G1203900	--	--	Molecular Function: glycogenin glucosyltransferase activity (GO:0008466);; Molecular Function: intramolecular transferase activity (GO:0016866);; Biological Process: cellulose biosynthetic process (GO:0030244);;	K13379|0|mdm:103437908|alpha-1,4-glucan-protein synthase [UDP-forming] 2; K13379 reversibly glycosylated polypeptide / UDP-arabinopyranose mutase [EC:2.4.1.- 5.4.99.30] (A)	--	--	Alpha-1,4-glucan-protein synthase [UDP-forming] 2 OS=Solanum tuberosum GN=UPTG2 PE=1 SV=1	O	Posttranslational modification, protein turnover, chaperones	PREDICTED: alpha-1,4-glucan-protein synthase [UDP-forming] 2 [Malus domestica]
MD17G1068900	[G]	Carbohydrate transport and metabolism	--	K00033|0|mdm:103404670|6-phosphogluconate dehydrogenase, decarboxylating 3; K00033 6-phosphogluconate dehydrogenase [EC:1.1.1.44 1.1.1.343] (A)	[G]	Carbohydrate transport and metabolism	6-phosphogluconate dehydrogenase, decarboxylating 3 OS=Arabidopsis thaliana GN=At3g02360 PE=2 SV=1	G	Carbohydrate transport and metabolism	PREDICTED: 6-phosphogluconate dehydrogenase, decarboxylating 3 [Malus domestica]
MD14G1218000	[E]	Amino acid transport and metabolism	Molecular Function: protein-arginine deiminase activity (GO:0004668);; Biological Process: putrescine biosynthetic process (GO:0009446);; Biological Process: embryo development ending in seed dormancy (GO:0009793);; Molecular Function: agmatine deiminase activity (GO:0047632);;	K10536|0|pxb:103930164|agmatine deiminase-like; K10536 agmatine deiminase [EC:3.5.3.12] (A)	--	--	Agmatine deiminase OS=Arabidopsis thaliana GN=AIH PE=1 SV=2	E	Amino acid transport and metabolism	PREDICTED: agmatine deiminase-like [Pyrus x bretschneideri]
MD09G1064200	[I]	Lipid transport and metabolism	--	K02160|1.79607e-152|mdm:103442406|biotin carboxyl carrier protein of acetyl-CoA carboxylase 2, chloroplastic; K02160 acetyl-CoA carboxylase biotin carboxyl carrier protein (A)	--	--	Biotin carboxyl carrier protein of acetyl-CoA carboxylase 2, chloroplastic OS=Arabidopsis thaliana GN=BCCP2 PE=2 SV=1	I	Lipid transport and metabolism	PREDICTED: biotin carboxyl carrier protein of acetyl-CoA carboxylase 2, chloroplastic [Malus domestica]
MD02G1096700	--	--	Molecular Function: DNA binding (GO:0003677);; Cellular Component: nucleus (GO:0005634);; Biological Process: regulation of transcription, DNA-templated (GO:0006355);; Biological Process: auxin-activated signaling pathway (GO:0009734);; Molecular Function: protein dimerization activity (GO:0046983);;	--	--	--	Auxin response factor 19 OS=Arabidopsis thaliana GN=ARF19 PE=1 SV=2	K	Transcription	PREDICTED: auxin response factor 7-like [Malus domestica]
MD15G1072600	--	--	--	--	--	--	--	--	--	PREDICTED: acyl-CoA-binding domain-containing protein 3-like [Malus domestica]
MD08G1194100	[G]	Carbohydrate transport and metabolism	Biological Process: maltose metabolic process (GO:0000023);; Biological Process: polysaccharide catabolic process (GO:0000272);; Molecular Function: glucose-6-phosphate isomerase activity (GO:0004347);; Cellular Component: cytosol (GO:0005829);; Biological Process: gluconeogenesis (GO:0006094);; Biological Process: glycolytic process (GO:0006096);; Cellular Component: chloroplast stroma (GO:00095…	K01810|0|mdm:103441653|glucose-6-phosphate isomerase 1, chloroplastic-like; K01810 glucose-6-phosphate isomerase [EC:5.3.1.9] (A)	[G]	Carbohydrate transport and metabolism	Glucose-6-phosphate isomerase 1, chloroplastic OS=Arabidopsis thaliana GN=PGI1 PE=1 SV=1	G	Carbohydrate transport and metabolism	PREDICTED: glucose-6-phosphate isomerase 1, chloroplastic-like [Malus domestica]
MD02G1284000	[O]	Posttranslational modification, protein turnover, chaperones	--	K08675|0|mdm:103411212|lon protease homolog 1, mitochondrial-like; K08675 Lon-like ATP-dependent protease [EC:3.4.21.-] (A)	[O]	Posttranslational modification, protein turnover, chaperones	Lon protease homolog, mitochondrial OS=Oryza sativa subsp. indica GN=OsI_27415 PE=2 SV=1	O	Posttranslational modification, protein turnover, chaperones	PREDICTED: lon protease homolog 1, mitochondrial-like [Malus domestica]
MD10G1004400	--	--	--	--	--	--	--	S	Function unknown	PREDICTED: uncharacterized protein LOC103429422 [Malus domestica]
MD16G1097800	[G]	Carbohydrate transport and metabolism	--	K08244|0|mdm:103403045|alpha-glucan water dikinase 1, chloroplastic-like; K08244 alpha-glucan, water dikinase [EC:2.7.9.4] (A)	--	--	Alpha-glucan water dikinase, chloroplastic OS=Citrus reticulata GN=R1 PE=2 SV=1	S	Function unknown	PREDICTED: alpha-glucan water dikinase 1, chloroplastic-like isoform X1 [Malus domestica]
Apple_newGene_29122	--	--	Molecular Function: DNA binding (GO:0003677);; Molecular Function: sequence-specific DNA binding transcription factor activity (GO:0003700);; Cellular Component: nucleus (GO:0005634);; Biological Process: regulation of transcription, DNA-templated (GO:0006355);;	--	--	--	Ethylene-responsive transcription factor RAP2-3 OS=Arabidopsis thaliana (Mouse-ear cress) PE=1 SV=2	K	Transcription	AP2 domain class transcription factor [Malus domestica]
MD03G1292100	[J]	Translation, ribosomal structure and biogenesis	Molecular Function: structural constituent of ribosome (GO:0003735);; Cellular Component: ribosome (GO:0005840);; Biological Process: translation (GO:0006412);;	K02885|1.86756e-120|mdm:103408132|60S ribosomal protein L19-3-like; K02885 large subunit ribosomal protein L19e (A)	[J]	Translation, ribosomal structure and biogenesis	60S ribosomal protein L19-1 OS=Arabidopsis thaliana GN=RPL19A PE=2 SV=1	J	Translation, ribosomal structure and biogenesis	PREDICTED: 60S ribosomal protein L19-3-like [Malus domestica]
MD10G1011000	--	--	Biological Process: regulation of transcription, DNA-templated (GO:0006355);;	--	--	--	Scarecrow-like protein 1 OS=Arabidopsis thaliana GN=SCL1 PE=2 SV=1	S	Function unknown	PREDICTED: scarecrow-like protein 1 [Malus domestica]
MD14G1173000	[BQ]	--	Cellular Component: nucleus (GO:0005634);; Biological Process: regulation of transcription, DNA-templated (GO:0006355);; Molecular Function: NAD-dependent histone deacetylase activity (H3-K14 specific) (GO:0032041);; Molecular Function: NAD-dependent histone deacetylase activity (H3-K9 specific) (GO:0046969);; Molecular Function: NAD-dependent histone deacetylase activity (H4-K16 specific) (GO:00…	K06067|0|mdm:103415224|histone deacetylase 6-like; K06067 histone deacetylase 1/2 [EC:3.5.1.98] (A)	[B]	Chromatin structure and dynamics	Histone deacetylase 6 OS=Arabidopsis thaliana GN=HDA6 PE=1 SV=1	BQ	--	PREDICTED: histone deacetylase 6-like isoform X1 [Malus domestica]
MD04G1040400	[RTKL]	--	--	K16196|0|pxb:103953603|probable serine/threonine-protein kinase GCN2; K16196 eukaryotic translation initiation factor 2-alpha kinase 4 [EC:2.7.11.1] (A)	[J]	Translation, ribosomal structure and biogenesis	eIF-2-alpha kinase GCN2 OS=Arabidopsis thaliana GN=GCN2 PE=2 SV=2	J	Translation, ribosomal structure and biogenesis	PREDICTED: eIF-2-alpha kinase GCN2 [Pyrus x bretschneideri]
MD12G1031800	--	--	--	--	[S]	Function unknown	--	S	Function unknown	PREDICTED: uncharacterized protein LOC103449498 [Malus domestica]
MD11G1001000	--	--	--	--	--	--	Nuclear pore complex protein NUP214 OS=Arabidopsis thaliana GN=NUP214 PE=1 SV=1	S	Function unknown	PREDICTED: nuclear pore complex protein NUP214 [Malus domestica]
MD01G1190700	[S]	Function unknown	--	--	--	--	Protein SUPPRESSOR OF npr1-1, CONSTITUTIVE 1 OS=Arabidopsis thaliana GN=SNC1 PE=1 SV=5	S	Function unknown	PREDICTED: disease resistance-like protein CSA1 [Pyrus x bretschneideri]
[truncated: 2,439 more rows]
