# Supplementary material for: Expression Characteristics in Roots, Phloem, Leaves, Flowers and Fruits of Apple circRNA
Source: Genes (Basel). 2022 Apr 18;13(4):712. doi: 10.3390/genes13040712 (PMC9030095; doi:10.3390/genes13040712)
Supplement: Supplementary file 1 [file genes-13-00712-s001.zip › Table S9.xlsx]

## Sheet: sheet 1
Table S9 Targets prediction in circRNAs for miRNA
miRNA_ID	Target	type	Flower	Phloem	Leaf	Root	Fruit	geneLength	gene_id
mdm-miR172a	Chr00:15360704|15361191	exon	0	0	304.144	0	0	300	MD00G1076400
mdm-miR171f	Chr00:15611952|15612116	exon	0	578.333	0	0	0	164	MD00G1078400
mdm-miR160a	Chr00:18744403|18744580	exon	546.976	0	0	0	0	177	MD00G1090900
mdm-miR1511	Chr00:4463124|4512033	intergenic_region	2.83001	0	17.1995	0	0	48909	n/a
mdm-miR7120a	Chr00:6748729|6749665	exon	0	0	398.238	84.9125	190.921	936	MD00G1039200
mdm-miR7120a	Chr00:6748729|6751911	intergenic_region	30.4257	0	0	0	0	3182	n/a
mdm-miR159c	Chr00:814895|824208	intergenic_region	0	0	0	0	200.672	9313	n/a
mdm-miR3627a	Chr01:16171091|16204711	intergenic_region	0	0	0	4.57335	0	33620	n/a
mdm-miR7125	Chr01:16726071|16816501	intergenic_region	0	0	0	0.821386	0	90430	n/a
mdm-miR171o	Chr01:17783278|17785127	exon	229.541	0	0	0	0	804	MD01G1072600
mdm-miR172a	Chr01:20773826|20845894	intergenic_region	2.36491	0	5.15688	0.735214	0	72068	n/a
mdm-miR172a	Chr01:20780434|20826822	intergenic_region	1.98921	2.49981	1.96696	2.40185	0	46388	n/a
mdm-miR172a	Chr01:20780434|20878427	intergenic_region	0	1.16271	0	0	0	97993	n/a
mdm-miR172a	Chr01:20781321|20827613	intergenic_region	0	38.6693	43.4018	29.7806	0	46292	n/a
mdm-miR172a	Chr01:20782434|20828279	intergenic_region	0	0	0	4.05049	0	45845	n/a
mdm-miR172a	Chr01:21162287|21214009	intergenic_region	4.06863	28.9368	10.0824	9.90442	10.5322	51722	n/a
mdm-miR156aa	Chr01:22950169|23000795	intergenic_region	3.36654	0	11.0774	0	0	50626	n/a
mdm-miR396f	Chr01:23040641|23086307	intergenic_region	0	11.4299	30.0509	0	0	45666	n/a
mdm-miR1511	Chr01:23157455|23211183	intergenic_region	17.1745	0	0	2.76496	0	53728	n/a
mdm-miR156ad	Chr01:23467476|23491416	intergenic_region	7.11923	34.2301	9.52832	5.76488	0	23940	n/a
mdm-miR171a	Chr01:24630212|24723522	intergenic_region	6.7711	4.42608	4.40032	0	0	93310	n/a
mdm-miR391	Chr01:25914990|25925094	intergenic_region	0	0	18.3903	0	0	10104	n/a
mdm-miR7124a	Chr01:27381080|27387550	intergenic_region	88.3396	234.551	81.6317	57.4018	9.47047	6470	n/a
mdm-miR7124a	Chr01:27382002|27388581	intergenic_region	0	324.534	0	0	0	6579	n/a
mdm-miR171g	Chr01:27862338|27920944	intergenic_region	0	2.63821	0	17.1678	1.04552	58606	n/a
mdm-miR171g	Chr01:27862349|27920944	intergenic_region	0	15.7988	0	84.4599	10.7762	58595	n/a
mdm-miR171g	Chr01:27862387|27920944	intergenic_region	0	1.32021	4.75056	8.25969	2.0928	58557	n/a
mdm-miR171g	Chr01:27863191|27921821	intergenic_region	0	0	0	0	9.29313	58630	n/a
mdm-miR171g	Chr01:27863854|27921821	intergenic_region	0	2.61899	0	2.88574	0	57967	n/a
mdm-miR171g	Chr01:27864102|27921821	intergenic_region	0	0	0	8.60257	0	57719	n/a
mdm-miR1511	Chr01:27874126|27951720	intergenic_region	0	0	0	1.91453	0	77594	n/a
mdm-miR156ad	Chr01:27955024|27993092	intergenic_region	63.2818	86.7911	64.6545	73.2853	71.5455	38068	n/a
mdm-miR156ad	Chr01:27955214|27993150	intergenic_region	0	0	0	0	62.0744	37936	n/a
mdm-miR1511	Chr01:28303728|28375275	intergenic_region	9.8151	26.2972	93.675	8.72638	3.66993	71547	n/a
mdm-miR169e	Chr01:28802765|28882551	intergenic_region	0	0	0	0	0.746591	79786	n/a
mdm-miR7126	Chr01:30563611|30565736	exon	0	0	0	63.323	50.7822	1173	MD01G1212200
mdm-miR156aa	Chr01:30564019|30584622	intergenic_region	0	0	0	2.841	0	20603	n/a
mdm-miR162a	Chr01:30955994|31005215	intergenic_region	0	13.6401	0	10.7479	0	49221	n/a
mdm-miR162a	Chr01:30957206|31007243	intergenic_region	0	0	5.60391	0	0	50037	n/a
mdm-miR1511	Chr01:32266675|32283069	intergenic_region	0	0	7.55624	0	0	16394	n/a
mdm-miR164a	Chr01:32457910|32471620	intergenic_region	0	491.671	0	283.5	0	13710	n/a
mdm-miR164a	Chr01:32468532|32479579	intergenic_region	0	0	0	0	210.773	11047	n/a
mdm-miR156t	Chr02:12203360|12210314	intergenic_region	0	272.366	0	0	0	6954	n/a
mdm-miR156t	Chr02:12203528|12210501	intergenic_region	0	0	0	0	8.78732	6973	n/a
mdm-miR156t	Chr02:12203646|12210619	intergenic_region	1559.62	1434.01	1743.43	936.335	1913.04	6973	n/a
mdm-miR156t	Chr02:12203932|12210910	intergenic_region	0	16.6181	0	0	114.879	6978	n/a
mdm-miR156t	Chr02:12204594|12211630	intergenic_region	295.082	0	225.832	174.188	0	7036	n/a
mdm-miR156t	Chr02:12205065|12219229	intergenic_region	0	0	0	0	53.4128	14164	n/a
mdm-miR156t	Chr02:12205065|12219238	intergenic_region	0	23.4222	0	0	0	14173	n/a
mdm-miR7122a	Chr02:13581506|13583167	intron	0	34.2978	0	0	0	1661	MD02G1161700
mdm-miR156ad	Chr02:1414474|1439751	intergenic_region	0	0	0	2.09619	0	25277	n/a
mdm-miR171o	Chr02:17754975|17810547	intergenic_region	93.0296	0	0	0	0	55572	n/a
mdm-miR167a	Chr02:18770856|18856902	intergenic_region	0	20.3921	0	0	51.4805	86046	n/a
mdm-miR169e	Chr02:20212691|20212843	exon	0	1017.2	0	0	0	152	MD02G1203100
mdm-miR156a	Chr02:2240672|2253520	intergenic_region	0	0	0	9.11164	0	12848	n/a
mdm-miR159c	Chr02:28225750|28248402	intergenic_region	0	63.4992	0	76.7316	0	22652	n/a
mdm-miR156ad	Chr02:30310246|30403956	intergenic_region	0	0	0	6.40355	0	93710	n/a
mdm-miR156ad	Chr02:30311907|30404274	intergenic_region	8.15594	3.8545	5.48125	2.18196	10.0659	92367	n/a
mdm-miR156ad	Chr02:30540588|30586354	intergenic_region	0	0	1.99369	0	0	45766	n/a
mdm-miR164a	Chr02:31360308|31404547	intergenic_region	0	2.62124	0	11.3893	0	44239	n/a
mdm-miR164a	Chr02:31360483|31404191	intergenic_region	0	0	0	4.49676	0	43708	n/a
mdm-miR164a	Chr02:31360537|31404777	intergenic_region	0	1.74746	0	15.3081	0	44240	n/a
mdm-miR164a	Chr02:31360797|31405037	intergenic_region	2.56833	6.94407	2.06246	8.51243	0	44240	n/a
mdm-miR164a	Chr02:31364293|31392613	intergenic_region	6.01816	5.45957	0	0	0	28320	n/a
mdm-miR164a	Chr02:31366499|31401832	intergenic_region	38.7913	11.2863	24.4477	21.7836	23.9919	35333	n/a
mdm-miR164a	Chr02:31367895|31403292	intergenic_region	0	0	3.86656	12.8844	0	35397	n/a
mdm-miR171c	Chr02:31595258|31603644	intergenic_region	52.6027	122.893	27.201	22.1141	0	8386	n/a
mdm-miR162a	Chr02:31783074|31800852	intergenic_region	0	0	0	129.52	0	17778	n/a
mdm-miR162a	Chr02:31783351|31801020	intergenic_region	67.9113	196.78	68.769	0	0	17669	n/a
mdm-miR396b	Chr02:32119229|32131999	intergenic_region	18.9535	0	0	0	0	12770	n/a
mdm-miR156a	Chr02:3284077|3352367	intergenic_region	118.544	6.46481	371.546	0	1.78361	68290	n/a
mdm-miR156a	Chr02:3284077|3352374	intergenic_region	1.35109	0	5.44139	0	0	68297	n/a
mdm-miR156a	Chr02:3289985|3364703	intergenic_region	1.29574	0	0	0	0	74718	n/a
mdm-miR477b	Chr02:3348217|3384556	intergenic_region	2.53929	0	7.71631	4.83226	0	36339	n/a
mdm-miR166a	Chr02:35452745|35460296	intergenic_region	0	29.0993	0	7.01701	0	7551	n/a
mdm-miR166a	Chr02:35452921|35460472	intergenic_region	0	70.3686	0	7.01701	0	7551	n/a
mdm-miR166a	Chr02:35453387|35460938	intergenic_region	0	0	24.1672	0	0	7551	n/a
mdm-miR172a	Chr02:35612916|35623283	intergenic_region	0	0	0	28.1103	71.8234	10367	n/a
mdm-miR171a	Chr02:35643532|35660206	intergenic_region	0	0	0	0	394.759	16674	n/a
mdm-miR5225a	Chr02:35690968|35783690	intergenic_region	0	0.614402	0	0	0	92722	n/a
mdm-miR5225a	Chr02:35719121|35742554	intergenic_region	5.90676	0	0	0	0	23433	n/a
mdm-miR827	Chr02:36543404|36590142	intergenic_region	0	3.4824	0	0	0	46738	n/a
mdm-miR171f	Chr02:37176460|37224849	intergenic_region	660.758	416.177	0	310.877	0	48389	n/a
mdm-miR396b	Chr02:4261528|4343053	exon	5.41681	0	0	0	0	17035	Apple_newGene_21821
mdm-miR1511	Chr02:4890119|4914867	intergenic_region	37.4663	94.6641	31.1281	86.4487	21.2109	24748	n/a
mdm-miR1511	Chr02:4890589|4915471	intergenic_region	0	3.81186	0	0	0	24882	n/a
mdm-miR396b	Chr02:5205455|5233799	intergenic_region	0	16.1179	0	0	0	28344	n/a
mdm-miR396b	Chr02:5209514|5241259	intergenic_region	0	4.48165	0	0	0	31745	n/a
mdm-miR167a	Chr02:5383557|5401747	intergenic_region	7.98362	0	0	0	0	18190	n/a
mdm-miR171a	Chr02:545875|548210	intergenic_region	0	0	0	136.405	0	2335	n/a
mdm-miR171a	Chr02:545895|548210	intergenic_region	0	0	0	64.171	0	2315	n/a
mdm-miR172i	Chr02:5494413|5499654	intergenic_region	129.308	985.639	0	161.757	617.366	5241	n/a
mdm-miR156ad	Chr02:5997995|6018120	intergenic_region	0	0	6.80073	0	0	20125	n/a
mdm-miR156ad	Chr02:5999413|6019712	intergenic_region	134.339	196.86	176.688	179.329	103.366	20299	n/a
mdm-miR1511	Chr02:7314511|7411893	intergenic_region	0	0.973964	0	0	0	97382	n/a
mdm-miR172a	Chr02:7830434|7855661	intergenic_region	0	170.474	0	126.181	0	25227	n/a
mdm-miR172a	Chr02:7830840|7855979	intergenic_region	44.2885	77.9909	0	84.3044	0	25139	n/a
mdm-miR172a	Chr02:7831219|7856466	intergenic_region	0	116.173	0	95.5413	0	25247	n/a
mdm-miR172a	Chr02:7832914|7861169	intergenic_region	0	0	0	2.0716	0	28255	n/a
mdm-miR156ad	Chr02:8007497|8021718	intergenic_region	0	16.0238	0	30.2387	0	14221	n/a
mdm-miR156ad	Chr02:8010385|8023151	intergenic_region	0	0	0	4.15051	0	12766	n/a
mdm-miR1511	Chr02:8107118|8200400	intergenic_region	0	13.26	0	0	23.3188	93282	n/a
mdm-miR171a	Chr02:821945|824753	exon	0	0	0	105.011	0	1061	MD02G1012900
mdm-miR7127a	Chr02:8485528|8543472	intergenic_region	0	0	0	141.026	528.684	57944	n/a
mdm-miR7127a	Chr02:8486132|8544082	intergenic_region	0	0	0	0	100.221	57950	n/a
mdm-miR7127a	Chr02:8487795|8545746	intergenic_region	53.342	0	0	31.4795	122.437	57951	n/a
mdm-miR7127a	Chr02:8487968|8545907	intergenic_region	324.082	0	0	77.5611	257.437	57939	n/a
mdm-miR7127a	Chr02:8488249|8546281	intergenic_region	0	0	0	5.99277	0	58032	n/a
mdm-miR7127a	Chr02:8488542|8546465	intergenic_region	0	0	0	17.1791	44.735	57923	n/a
mdm-miR7127a	Chr02:8488977|8546934	intergenic_region	0	0	0	19.6939	64.7506	57957	n/a
mdm-miR156a	Chr02:868489|929465	intergenic_region	0	10.7442	0	14.3429	0	60976	n/a
mdm-miR1511	Chr02:962365|989332	intergenic_region	0	0	0	0	26.9182	26967	n/a
mdm-miR164b	Chr03:1030036|1094488	intergenic_region	0	0.883892	0	0	0	64452	n/a
mdm-miR535b	Chr03:11306579|11309687	exon	0	0	34.1223	0	0	2674	MD03G1121600
mdm-miR482a-3p	Chr03:1226434|1277176	intergenic_region	6.54374	31.9814	7.90145	12.9796	3.0189	50742	n/a
mdm-miR156ab	Chr03:1227295|1228996	exon	0	228.946	0	0	0	1013	MD03G1015400
mdm-miR482a-3p	Chr03:1231747|1277938	intergenic_region	0	2.46665	0	1.72064	0	46191	n/a
mdm-miR482a-3p	Chr03:1259550|1276955	intergenic_region	0	0	0	17.0705	0	17405	n/a
mdm-miR156ad	Chr03:12690287|12773948	intergenic_region	2.71627	0	0	0	0	83661	n/a
mdm-miR535b	Chr03:12811510|12811953	exon	0	0	0	0	179.689	341	MD03G1130200
mdm-miR156ab	Chr03:137389|137563	exon	556.406	0	0	0	0	174	MD03G1001800
mdm-miR156ad	Chr03:1377274|1443567	intergenic_region	0	1.28902	0	0	0	66293	n/a
mdm-miR156ad	Chr03:1377367|1443660	intergenic_region	2.78386	10.6121	10.2946	3.91786	0.898548	66293	n/a
mdm-miR167b	Chr03:2040880|2078717	intergenic_region	0	8.60324	0	0	0	37837	n/a
mdm-miR3627a	Chr03:2089800|2131827	intergenic_region	0	0	0	1.89112	0	42027	n/a
mdm-miR3627a	Chr03:2090789|2133103	intergenic_region	0	0	0	1.38331	1.40775	42314	n/a
mdm-miR3627a	Chr03:2094887|2137408	intergenic_region	0	6.05835	0	4.818	1.44103	42521	n/a
mdm-miR3627a	Chr03:2100832|2152541	intergenic_region	0	13.4535	0	4.92229	0	51709	n/a
mdm-miR396a	Chr03:22369724|22385034	intergenic_region	0	16.7346	0	14.5681	0	15310	n/a
mdm-miR396a	Chr03:22369749|22385058	intergenic_region	0	0	8.09177	0	0	15309	n/a
mdm-miR535a	Chr03:24828369|24914226	intergenic_region	0	0.663529	0	0	0	85857	n/a
mdm-miR535a	Chr03:24869329|24913998	intergenic_region	0	0	0	2.49428	0	44669	n/a
mdm-miR535a	Chr03:24882205|24927824	intergenic_region	0	0	0	0	5.22304	45619	n/a
mdm-miR156aa	Chr03:26297306|26324247	intergenic_region	0	0	6.93869	0	0	26941	n/a
mdm-miR7126	Chr03:26310297|26336750	intergenic_region	0	0	0	40.9268	0	26453	n/a
mdm-miR7126	Chr03:26310772|26336846	intergenic_region	0	0	0	119.654	0	26074	n/a
mdm-miR164a	Chr03:2637516|2697073	intergenic_region	14.2449	13.5886	15.488	0	15.7606	59557	n/a
mdm-miR164a	Chr03:2640942|2700345	intergenic_region	0	0.959019	0	0	0	59403	n/a
mdm-miR156ad	Chr03:2746962|2755122	exon	40.1966	0	118.141	0	0	5739	MD03G1034300
mdm-miR156ad	Chr03:2746979|2755047	exon	0	0	16.1578	0	0	5647	MD03G1034300
mdm-miR171i	Chr03:27601103|27612581	intergenic_region	0	0	0	0	77.8456	11478	n/a
mdm-miR171i	Chr03:27601489|27613328	intergenic_region	0	0	0	0	89.165	11839	n/a
mdm-miR171i	Chr03:27604102|27615621	intergenic_region	0	0	63.3688	0	0	11519	n/a
mdm-miR482d	Chr03:31052836|31064477	intergenic_region	166.312	1156.29	145.161	524.516	61.8225	11641	n/a
mdm-miR1511	Chr03:31862713|31915300	intergenic_region	0	0	0	1.51136	3.86036	52587	n/a
mdm-miR171a	Chr03:36074784|36122075	intergenic_region	0	2.40928	0	1.68062	0	47291	n/a
mdm-miR171a	Chr03:36078451|36126044	intergenic_region	0	94.9759	0	59.5037	0	47593	n/a
mdm-miR159a	Chr03:36305540|36311119	exon	0	57.2915	0	107.456	0	5182	MD03G1282700
mdm-miR172a	Chr03:36596334|36622026	intergenic_region	0	3.00901	0	3.4174	0	25692	n/a
mdm-miR172a	Chr03:36604088|36623687	intergenic_region	0	0	0	28.4241	0	19599	n/a
mdm-miR7126	Chr03:36800734|36808778	intergenic_region	0	38.4423	0	0	0	8044	n/a
mdm-miR159a	Chr03:37007126|37021931	intergenic_region	0	0	111.859	0	0	14805	n/a
mdm-miR482d	Chr03:37063183|37063650	exon	0	0	730.216	0	159.568	384	MD03G1294400
mdm-miR171m	Chr03:3854591|3949531	intergenic_region	21.8102	57.7507	15.404	53.7504	4.89264	94940	n/a
mdm-miR171m	Chr03:3945110|3956427	intergenic_region	56.8686	5.0339	66.8256	9.84509	37.5233	11317	n/a
mdm-miR171m	Chr03:3945121|3956241	intergenic_region	0	0	33.42	0	5.51025	11120	n/a
mdm-miR171m	Chr03:3945121|3956427	intergenic_region	235.745	8.38905	147.82	0	124.287	11306	n/a
mdm-miR171m	Chr03:3945121|3957131	intergenic_region	0	0	15.565	0	0	12010	n/a
mdm-miR171m	Chr03:3945131|3956427	intergenic_region	10.0587	0	0	0	5.27332	11296	n/a
mdm-miR162a	Chr03:5085991|5103422	intergenic_region	5.55417	22.0592	10.7243	13.1137	0	17431	n/a
mdm-miR162a	Chr03:5086357|5103783	intergenic_region	0	0	24.8806	0	0	17426	n/a
mdm-miR162a	Chr03:5086833|5103422	intergenic_region	172.574	183.089	210.457	130.15	120.242	16589	n/a
mdm-miR162a	Chr03:5087498|5104146	intergenic_region	0	0	8.22109	0	9.75515	16648	n/a
mdm-miR159a	Chr03:8046395|8069300	intergenic_region	0	0	0	7.07608	0	22905	n/a
mdm-miR482a-5p	Chr03:8958587|8976746	intergenic_region	0	0	7.53702	0	0	18159	n/a
mdm-miR172a	Chr03:9398433|9428603	intergenic_region	284.34	0	275.1	0	0	30170	n/a
mdm-miR162a	Chr04:1458387|1511433	intergenic_region	0	0	0	2.49714	0	53046	n/a
mdm-miR162a	Chr04:1459522|1512534	intergenic_region	0	0	0	1.10415	0	53012	n/a
mdm-miR162a	Chr04:1459581|1512313	intergenic_region	0	0	0	8.03845	0	52732	n/a
mdm-miR162a	Chr04:1464398|1515359	intergenic_region	0	2.63488	0	2.49727	0	50961	n/a
mdm-miR162a	Chr04:1470615|1529754	intergenic_region	0	20.0474	0	25.6929	0	59139	n/a
mdm-miR1511	Chr04:17511858|17540994	intergenic_region	552.402	167.648	0	132.592	147.711	29136	n/a
mdm-miR319a	Chr04:21368712|21428227	intergenic_region	0	0	2.08144	0	0	59515	n/a
mdm-miR477a	Chr04:24365452|24384110	intergenic_region	0	9.15992	4.8903	17.0707	0	18658	n/a
mdm-miR477a	Chr04:24365910|24384618	intergenic_region	0	0	0	11.9111	0	18708	n/a
mdm-miR156ad	Chr04:2788156|2878235	intergenic_region	0	0	0	3.23516	0	90079	n/a
mdm-miR399a	Chr04:29123475|29157507	intergenic_region	73.1426	0	97.5422	0	21.7513	34032	n/a
mdm-miR156ad	Chr04:3096853|3140035	intergenic_region	0	18.6104	0	0	0	43182	n/a
mdm-miR156ad	Chr04:3097075|3140948	intergenic_region	0	10.2768	0	4.90195	0	43873	n/a
mdm-miR156ad	Chr04:3097166|3140929	intergenic_region	0	7.00204	0	0	0	43763	n/a
mdm-miR395a	Chr04:3103132|3145653	intergenic_region	0	0	0	141.099	0	42521	n/a
mdm-miR395a	Chr04:3104508|3147085	intergenic_region	0	12.7551	0	3.99159	0	42577	n/a
mdm-miR395a	Chr04:3114414|3148842	intergenic_region	0	4.13239	0	0	0	34428	n/a
mdm-miR395a	Chr04:3115225|3149634	intergenic_region	0	24.9208	0	12.0327	0	34409	n/a
mdm-miR1511	Chr04:31323435|31382228	intergenic_region	96.7208	6.82525	576.1	0	1.5633	58793	n/a
mdm-miR156ad	Chr04:3879583|3961011	intergenic_region	0	1.16479	0	0	0	81428	n/a
mdm-miR167b	Chr04:3912161|3971202	intergenic_region	0	0	0	0.897434	0	59041	n/a
mdm-miR7126	Chr04:439393|501213	intergenic_region	0	131.93	0	0	0	61820	n/a
mdm-miR171a	Chr04:6232453|6246599	intergenic_region	12.0482	0	0	0	0	14146	n/a
mdm-miR477a	Chr05:15867678|15869644	exon	0	102.094	0	0	0	1116	MD05G1074600
mdm-miR156ab	Chr05:21336905|21380732	intergenic_region	0	0	22.612	52.1948	0	43827	n/a
mdm-miR1511	Chr05:21821886|21853409	intergenic_region	0	4.90483	0	0	0	31523	n/a
mdm-miR156p	Chr05:22123264|22128805	exon	0	0	82.3123	0	0	2217	MD05G1107800
mdm-miR156aa	Chr05:22911295|22972237	intergenic_region	0	0	41.922	0	0	60942	n/a
mdm-miR156ad	Chr05:24825574|24885274	intergenic_region	0	0	0	1.47068	0	59700	n/a
mdm-miR156aa	Chr05:27303257|27394950	intergenic_region	0	0	0	0	125.705	91693	n/a
mdm-miR535a	Chr05:28453544|28466519	intergenic_region	13.1356	0	0	0	0	12975	n/a
mdm-miR2111a	Chr05:29494507|29495627	exon	0	0	0	91.6012	0	639	MD05G1165800
mdm-miR399d	Chr05:32485471|32510183	intergenic_region	0	0	0	0	6.09522	24712	n/a
mdm-miR535a	Chr05:34439559|34472366	intergenic_region	0	11.9215	0	17.7975	0	32807	n/a
mdm-miR1511	Chr05:34731941|34812265	intergenic_region	1.14879	0	2.31332	0	5.25756	80324	n/a
mdm-miR391	Chr05:3583374|3588106	exon	0	0	0	73.6932	0	719	MD05G1021200
mdm-miR391	Chr05:3587710|3588106	exon	0	0	0	372.033	0	236	MD05G1021200
mdm-miR7120a	Chr05:36214536|36268376	intergenic_region	3.59639	0	0	0	0	53840	n/a
mdm-miR7120a	Chr05:36221550|36275677	intergenic_region	1.78866	0	0	0	0	54127	n/a
mdm-miR7120a	Chr05:36223206|36277248	intergenic_region	18.8105	0	0	0	0	54042	n/a
mdm-miR172a	Chr05:36460138|36473167	intergenic_region	0	0	0	6.10009	0	13029	n/a
mdm-miR172a	Chr05:36516345|36572931	intergenic_region	10.5983	0	25.5565	0	20.573	56586	n/a
mdm-miR172a	Chr05:36519798|36577616	intergenic_region	0	0	0	5.78108	0	57818	n/a
mdm-miR167b	Chr05:36800517|36848995	intergenic_region	0	0	0	0	1.84313	48478	n/a
mdm-miR167b	Chr05:36802434|36850954	intergenic_region	1.99536	0	0	0	0	48520	n/a
mdm-miR1511	Chr05:39947590|39967655	intergenic_region	0	0	0	7.29295	0	20065	n/a
mdm-miR169e	Chr05:43378067|43447108	intergenic_region	0	3.3592	0	0	0	69041	n/a
mdm-miR395a	Chr05:44092469|44095265	exon	0	0	0	53.8246	0	1380	MD05G1310200
mdm-miR319a	Chr05:44489630|44519006	intergenic_region	0	0	48.4949	0	0	29376	n/a
mdm-miR319a	Chr05:44490587|44520085	intergenic_region	33.7439	0	37.3441	0	25.3167	29498	n/a
mdm-miR319a	Chr05:44494456|44587724	intergenic_region	0	17.3053	0	22.5583	0	93268	n/a
mdm-miR171a	Chr05:45610488|45626542	intergenic_region	0	0	0	6.94013	0	16054	n/a
mdm-miR167b	Chr05:45610619|45679387	intergenic_region	0	3.44806	0	2.4325	0	68768	n/a
mdm-miR171a	Chr05:45612195|45632173	intergenic_region	0	0	0	3.71798	0	19978	n/a
mdm-miR3627a	Chr05:45800353|45810556	intergenic_region	0	0	0	0	6.00548	10203	n/a
mdm-miR171j	Chr05:46079300|46090952	intergenic_region	22.5463	18.1586	248.54	72.677	0	11652	n/a
mdm-miR1511	Chr05:46081864|46100074	intergenic_region	0	6.25685	0	0	0	18210	n/a
mdm-miR395a	Chr05:46571604|46605695	intergenic_region	209.264	201.816	347.063	171.112	199.779	34091	n/a
mdm-miR166a	Chr05:46610748|46630480	intergenic_region	0	0	0	0	14.4033	19732	n/a
mdm-miR156ad	Chr05:7388516|7484072	intergenic_region	0	7.44432	0	0	0	95556	n/a
mdm-miR396c	Chr06:1184144|1210797	intergenic_region	0	0	0	0	1019.39	26653	n/a
mdm-miR396c	Chr06:1184730|1211394	intergenic_region	19.4593	4.34898	49.5059	14.7216	707.854	26664	n/a
mdm-miR156ad	Chr06:19223917|19262585	intergenic_region	0	0	0	0	4.19995	38668	n/a
mdm-miR1511	Chr06:20911957|21005923	intergenic_region	0	0	0	0	16.4191	93966	n/a
mdm-miR164a	Chr06:24689498|24734731	intergenic_region	0	1.88917	0	0	0	45233	n/a
mdm-miR164a	Chr06:24689664|24734087	intergenic_region	0	122.47	0	124.046	0	44423	n/a
mdm-miR164a	Chr06:24690652|24735063	intergenic_region	0	20.2887	0	11.9307	0	44411	n/a
mdm-miR156ad	Chr06:25459412|25535842	intergenic_region	0	12.6713	0	0	0	76430	n/a
mdm-miR169e	Chr06:2915842|2953152	intergenic_region	0	0	4.89108	0	0	37310	n/a
mdm-miR171i	Chr06:29221153|29277059	intergenic_region	0	0	3.84789	0.947759	20.1104	55906	n/a
mdm-miR164a	Chr06:30040401|30055168	intergenic_region	160.626	415.532	67.9674	109.004	78.8383	14767	n/a
mdm-miR535b	Chr06:30045028|30058857	intergenic_region	0	0	0	48.3405	0	13829	n/a
mdm-miR7124a	Chr06:30076873|30077937	intron	0	0	0	69.8101	0	1064	MD06G1159200
mdm-miR535a	Chr06:30831370|30927553	intergenic_region	6.86158	0	11.5802	0	5.03548	96183	n/a
mdm-miR535a	Chr06:30849907|30875465	intergenic_region	11.1142	0	14.5845	0	10.2736	25558	n/a
mdm-miR172i	Chr06:31528205|31617589	intergenic_region	0	3.18334	0	0	0	89384	n/a
mdm-miR482a-5p	Chr06:31903862|31941695	intergenic_region	15.1074	6.27146	0	2.10076	0	37833	n/a
mdm-miR482a-5p	Chr06:31923998|31940969	intergenic_region	0	0	0	3.12212	0	16971	n/a
mdm-miR482a-5p	Chr06:31937422|31940969	intergenic_region	0	0	0	0	22.8931	3547	n/a
mdm-miR171o	Chr06:3683303|3742011	intergenic_region	0	0	686.173	0	0	58708	n/a
mdm-miR1511	Chr06:379010|408463	intergenic_region	140.984	0	0	0	0	29453	n/a
mdm-miR1511	Chr06:380845|410393	intergenic_region	154.747	0	320.439	0	182.875	29548	n/a
mdm-miR1511	Chr06:390643|432822	intergenic_region	0	0	0	2.0816	0	42179	n/a
mdm-miR159a	Chr06:3961004|3966256	intergenic_region	0	1221.73	0	0	0	5252	n/a
mdm-miR156ad	Chr07:11399203|11476229	intergenic_region	0	1.1094	0	0.759915	0	77026	n/a
mdm-miR156a	Chr07:11672452|11768750	intergenic_region	0	0	0	0	0.927862	96298	n/a
mdm-miR396b	Chr07:11884798|11946915	intergenic_region	0	0	0	1.41346	0	62117	n/a
mdm-miR172i	Chr07:12121993|12212301	intergenic_region	0	0.630826	0	0	0	90308	n/a
mdm-miR172i	Chr07:12123734|12149615	intergenic_region	0	3.66472	0	0	0	25881	n/a
mdm-miR7123a	Chr07:14961657|15025748	intergenic_region	21.2477	12.0484	9.37509	8.74555	30.1303	64091	n/a
mdm-miR1511	Chr07:1752265|1819061	intergenic_region	0	0.852875	0	0	0	66796	n/a
mdm-miR1511	Chr07:1752543|1770180	intergenic_region	0	0	0	24.8908	0	17637	n/a
mdm-miR1511	Chr07:1752870|1819617	intergenic_region	0	0	0	3.34153	1.21656	66747	n/a
mdm-miR7126	Chr07:21771436|21781927	exon	0	0	0	0	21.0077	5798	MD07G1149400
mdm-miR162a	Chr07:2443337|2481759	intergenic_region	6.00407	0	0	0	0	38422	n/a
mdm-miR162a	Chr07:2587170|2630814	intergenic_region	41.0323	2.17319	72.4228	10.2058	4.15567	43644	n/a
mdm-miR171o	Chr07:27662155|27699160	intergenic_region	0	0	194.488	0	139.09	37005	n/a
mdm-miR399i	Chr07:27689475|27699160	intergenic_region	0	122.414	0	0	0	9685	n/a
mdm-miR159c	Chr07:2900025|2998060	intergenic_region	1.48133	0	0	0	0	98035	n/a
mdm-miR535b	Chr07:31240514|31292113	intergenic_region	19.8329	0	11.6231	0	0	51599	n/a
mdm-miR535b	Chr07:31240514|31292222	intergenic_region	5.0059	0	5.98925	0	0	51708	n/a
mdm-miR7122a	Chr07:31292222|31383524	intergenic_region	12.6775	0	4.89099	0	1.9853	91302	n/a
mdm-miR7122a	Chr07:31302234|31380043	intergenic_region	0	22.7832	0	25.0329	0	77809	n/a
mdm-miR172a	Chr07:31926622|31937403	intergenic_region	0	0	0	27.0309	0	10781	n/a
mdm-miR172a	Chr07:31926743|31937129	intergenic_region	168.807	0	0	0	0	10386	n/a
mdm-miR172a	Chr07:31927858|31938249	intergenic_region	0	4066.17	0	5576.04	0	10391	n/a
mdm-miR7124a	Chr07:3247616|3306470	intergenic_region	0	0	0	0	5.06061	58854	n/a
mdm-miR391	Chr07:32605533|32623002	intergenic_region	0	46.3277	0	49.7768	0	17469	n/a
mdm-miR482d	Chr07:32614354|32651635	intergenic_region	0	2.5441	0	0	0	37281	n/a
mdm-miR482d	Chr07:32615615|32683767	intergenic_region	0	1.39169	0	0	0	68152	n/a
mdm-miR482d	Chr07:32617025|32685656	intergenic_region	0	1.24511	0	0	0	68631	n/a
mdm-miR1511	Chr07:34935797|35021108	intergenic_region	2.4135	1.00166	1.06954	1.74134	0	85311	n/a
mdm-miR1511	Chr07:35941855|35963627	intergenic_region	0	2.6166	0	0	0	21772	n/a
mdm-miR399a	Chr07:4824513|4852092	intergenic_region	5.26568	0	0	0	0	27579	n/a
mdm-miR156a	Chr07:5192241|5276163	intergenic_region	3.46088	0	0	0	0	83922	n/a
mdm-miR156a	Chr07:5196281|5282733	intergenic_region	0	1.99133	0	2.85425	0	86452	n/a
mdm-miR167b	Chr07:827205|857909	intergenic_region	0	6.17813	0	0	0	30704	n/a
mdm-miR171i	Chr08:12108963|12175813	intergenic_region	0	0	6.4359	0	0	66850	n/a
mdm-miR396b	Chr08:1434066|1464936	intergenic_region	0	0	0	2.40615	0	30870	n/a
mdm-miR156a	Chr08:24981969|25023512	intergenic_region	21.3746	0	29.0345	0	27.0196	41543	n/a
mdm-miR828a	Chr08:26167274|26198783	intergenic_region	12.0743	0	16.068	0	11.6206	31509	n/a
mdm-miR828a	Chr08:26167439|26198125	intergenic_region	0	3.77896	0	0	0	30686	n/a
mdm-miR828a	Chr08:26167641|26198114	intergenic_region	7.45728	0	0	0	0	30473	n/a
mdm-miR828a	Chr08:26167641|26198125	intergenic_region	0	105.949	0	100.908	14.6554	30484	n/a
mdm-miR7120a	Chr08:26170040|26209930	intergenic_region	0	2.85629	0	0	0	39890	n/a
mdm-miR7120a	Chr08:26170728|26210531	intergenic_region	0	19.192	0	27.2137	0	39803	n/a
mdm-miR7120a	Chr08:26180615|26213262	intergenic_region	373.446	653.503	224.627	584.777	202.685	32647	n/a
mdm-miR162a	Chr08:26197770|26211509	intergenic_region	0	0	0	13.8944	0	13739	n/a
mdm-miR7120a	Chr08:26197770|26213960	intergenic_region	0	8.79688	0	14.0849	0	16190	n/a
mdm-miR171o	Chr08:26356932|26363729	exon	0	0	38.8931	0	0	2346	MD08G1203800
mdm-miR171o	Chr08:26359956|26363729	exon	0	130.462	0	0	0	1310	MD08G1203800
mdm-miR172a	Chr08:26468048|26542478	intergenic_region	0	6.23196	0	0	0	74430	n/a
mdm-miR172a	Chr08:26468048|26543467	intergenic_region	0	1.13304	0	0	0	75419	n/a
mdm-miR172a	Chr08:26468314|26543609	intergenic_region	11.6258	37.7396	11.1722	0	0	75295	n/a
mdm-miR172a	Chr08:26468801|26544081	intergenic_region	6.41238	38.7564	13.9285	2.5358	0	75280	n/a
mdm-miR172a	Chr08:26469488|26544892	intergenic_region	0	20.0206	3.71868	0	0	75404	n/a
mdm-miR172a	Chr08:26470957|26545934	intergenic_region	0	4.93879	0	0	0	74977	n/a
mdm-miR172a	Chr08:26472735|26546625	intergenic_region	0	2.61563	0	1.43417	0	73890	n/a
mdm-miR159c	Chr08:26544793|26643692	intergenic_region	0	0	1.87884	0	0	98899	n/a
mdm-miR172a	Chr08:27695024|27714255	intergenic_region	0	0	17.6276	0	0	19231	n/a
mdm-miR1511	Chr08:29829667|29874944	intergenic_region	0	0	0	0	3.58689	45277	n/a
mdm-miR1511	Chr08:29829793|29875349	intergenic_region	0	0	0	0	13.3685	45556	n/a
mdm-miR1511	Chr08:29830628|29875437	intergenic_region	77.3858	0	0	0	8838.64	44809	n/a
mdm-miR7120a	Chr08:29876242|29903527	intergenic_region	0	0	0	0	3.27474	27285	n/a
mdm-miR156ad	Chr08:3340012|3349116	intergenic_region	504.103	0	130.29	0	275.939	9104	n/a
mdm-miR408b	Chr08:3404238|3445356	intergenic_region	2.24416	0	0	0	0	41118	n/a
mdm-miR408b	Chr08:3404281|3445399	intergenic_region	0	0	3.32858	0	0	41118	n/a
mdm-miR408b	Chr08:3416554|3459483	intergenic_region	0	0	4.32844	0	0	42929	n/a
mdm-miR319a	Chr08:4382657|4429858	intergenic_region	0	0	0	0	9.73612	47201	n/a
mdm-miR1511	Chr08:6911884|6938780	intergenic_region	0	12.3481	0	15.5759	0	26896	n/a
mdm-miR1511	Chr08:6914339|6941861	intergenic_region	0	0	13.5844	0	0	27522	n/a
mdm-miR159c	Chr08:7751216|7770967	intergenic_region	0	0	0	26.672	0	19751	n/a
mdm-miR7120a	Chr08:9023957|9118666	intergenic_region	2.39941	0	2.89022	0	0	94709	n/a
mdm-miR408b	Chr09:10043944|10063637	intergenic_region	0	6.81847	15.7829	12.4069	0	19693	n/a
mdm-miR408b	Chr09:10046332|10111386	intergenic_region	0	1.31357	0	0	0	65054	n/a
mdm-miR1511	Chr09:10716985|10745746	intergenic_region	0	0	0	2.7634	0	28761	n/a
mdm-miR1511	Chr09:10718586|10742875	intergenic_region	0	3.18282	0	0	0	24289	n/a
mdm-miR1511	Chr09:10718586|10742880	intergenic_region	0	50.4342	0	18.5487	0	24294	n/a
mdm-miR1511	Chr09:10718586|10742887	intergenic_region	0	479.638	32.4643	51.7712	0	24301	n/a
mdm-miR1511	Chr09:10718586|10743013	intergenic_region	0	7.91209	0	8.80432	0	24427	n/a
mdm-miR162a	Chr09:10902823|10928033	intergenic_region	5.4904	0	0	0	4.7257	25210	n/a
mdm-miR162a	Chr09:10903445|10928571	intergenic_region	0	76.9198	70.6792	0	75.5987	25126	n/a
mdm-miR159c	Chr09:11055811|11075290	intergenic_region	0	2.92462	0	0	0	19479	n/a
mdm-miR171o	Chr09:11269817|11270477	exon	0	0	0	343.028	0	371	MD09G1145000
mdm-miR408b	Chr09:1198090|1199010	exon	0	0	134.649	0	0	920	MD09G1019800
mdm-miR156a	Chr09:13870114|13935299	intergenic_region	0	0	0	32.1074	0	65185	n/a
mdm-miR1511	Chr09:14856638|14886052	intergenic_region	21.7258	56.4053	0	154.21	51.3357	29414	n/a
mdm-miR1511	Chr09:14857345|14886977	intergenic_region	0	0	0	147.644	0	29632	n/a
mdm-miR159a	Chr09:15963472|15964206	exon	0	0	0	138.063	0	538	MD09G1184300
mdm-miR535b	Chr09:17205939|17206544	exon	398.415	0	0	0	0	243	MD09G1192900
mdm-miR172a	Chr09:17939216|17968190	intergenic_region	0	0	0	6.40053	0	28974	n/a
mdm-miR1511	Chr09:18210012|18262440	intergenic_region	5.3667	0	1.74035	0	0	52428	n/a
mdm-miR396a	Chr09:18294873|18308308	intergenic_region	11835.4	0	5910.4	0	0	13435	n/a
mdm-miR159c	Chr09:1953846|1954080	exon	0	0	0	250.142	0	234	MD09G1032200
mdm-miR156aa	Chr09:20862297|20893042	intergenic_region	15.7009	0	0	0	0	30745	n/a
mdm-miR156aa	Chr09:20862297|20893047	intergenic_region	0	0	0	0	1.99265	30750	n/a
mdm-miR156a	Chr09:20862297|20959225	intergenic_region	0	0	0	0	0.921831	96928	n/a
mdm-miR156aa	Chr09:20863617|20894962	intergenic_region	254.644	302.532	0	100.839	144.429	31345	n/a
mdm-miR156a	Chr09:20864133|20961709	intergenic_region	0	0	0	0	25.9451	97576	n/a
mdm-miR156a	Chr09:20865852|20963360	intergenic_region	0	0	0	0	59.3837	97508	n/a
mdm-miR156a	Chr09:20895094|20961140	intergenic_region	117.845	0	0	0	0	66046	n/a
mdm-miR7124a	Chr09:2344794|2380643	intergenic_region	0	368.321	0	316.296	0	35849	n/a
mdm-miR7124a	Chr09:2345513|2382179	intergenic_region	0	0	369.948	592.877	0	36666	n/a
mdm-miR7124a	Chr09:2347006|2362409	intergenic_region	0	0	0	12.4	0	15403	n/a
mdm-miR7124a	Chr09:2347006|2383968	intergenic_region	9.22214	312.792	23.5209	442.932	15.9981	36962	n/a
mdm-miR7124a	Chr09:2361540|2383099	intergenic_region	0	0	0	9.58957	0	21559	n/a
mdm-miR156ad	Chr09:2472407|2489506	intergenic_region	0	173.997	0	180.938	0	17099	n/a
mdm-miR156ad	Chr09:2477815|2500540	intergenic_region	0	0	0	2.33159	12.8226	22725	n/a
mdm-miR156aa	Chr09:28594910|28644519	intergenic_region	0	45.9341	0	0	0	49609	n/a
mdm-miR156ad	Chr09:29859807|29862379	exon	0	0	0	0	53.4211	2294	MD09G1236600
mdm-miR156ad	Chr09:32764903|32800901	intergenic_region	0	0	3.44122	0	0	35998	n/a
mdm-miR156ad	Chr09:32765658|32801276	intergenic_region	0	0	0	0	30553	35618	n/a
mdm-miR171o	Chr09:34347433|34412591	intergenic_region	0	3.0601	0	0	0	65158	n/a
mdm-miR535a	Chr09:34810600|34906342	intergenic_region	8.69704	20.8612	11.9395	6.37733	1.27998	95742	n/a
mdm-miR396a	Chr09:35208008|35306837	intergenic_region	3.42867	11.0752	0	0.804198	0	98829	n/a
mdm-miR396a	Chr09:35216344|35314004	intergenic_region	0	6.72858	2.33573	0	0	97660	n/a
mdm-miR3627a	Chr09:35425345|35456372	intergenic_region	0	0	0	7.11029	0	31027	n/a
mdm-miR156ad	Chr09:35989095|36005591	intergenic_region	0	5.18022	0	0	0	16496	n/a
mdm-miR159a	Chr09:36523408|36523827	exon	0	0	296.244	0	0	308	MD09G1286700
mdm-miR162a	Chr09:37057630|37068915	intergenic_region	0	0	8.08535	0	0	11285	n/a
mdm-miR482a-5p	Chr09:5191681|5226302	intergenic_region	6494.8	597.016	40.1748	2187.43	6.46075	34621	n/a
mdm-miR156ad	Chr09:5191681|5291345	intergenic_region	53.4276	0	0	0	0	99664	n/a
mdm-miR482a-5p	Chr09:5192137|5227202	intergenic_region	12.7097	0	0	0	0	35065	n/a
mdm-miR156ad	Chr09:5226776|5291345	intergenic_region	0	0	0	22.2098	0	64569	n/a
mdm-miR156ad	Chr09:5227531|5293453	intergenic_region	2.58539	0	0	0	0	65922	n/a
mdm-miR477a	Chr09:6185330|6256316	intergenic_region	0	0	0	2.61593	0	70986	n/a
mdm-miR477a	Chr09:6185376|6256316	intergenic_region	0	3.51651	0	2.47533	0	70940	n/a
mdm-miR156a	Chr09:7983096|8028049	intergenic_region	6.31898	0	58.2185	0	0	44953	n/a
mdm-miR396c	Chr09:8747352|8747572	exon	1291.17	431.121	849.706	0	0	220	MD09G1114800
mdm-miR7126	Chr09:9332040|9350168	intergenic_region	10.1804	0	0	0	0	18128	n/a
mdm-miR7126	Chr09:9333615|9353369	intergenic_region	129.06	79.7889	51.5962	55.25	174.776	19754	n/a
mdm-miR7126	Chr09:9333615|9353563	intergenic_region	0	0	18.6861	0	0	19948	n/a
mdm-miR1511	Chr09:9847986|9873231	intergenic_region	0	0	0	0	48.5434	25245	n/a
mdm-miR396a	Chr10:11671120|11732233	intergenic_region	39.6048	0	0	0	8.63666	61113	n/a
mdm-miR396a	Chr10:11671120|11753534	intergenic_region	88.5616	6.56687	19.3748	0	0	82414	n/a
mdm-miR396c	Chr10:12047047|12047750	exon	0	0	381.77	0	0	239	MD10G1081900
mdm-miR396c	Chr10:12047047|12048207	exon	0	0	0	167.293	0	444	MD10G1081900
mdm-miR396c	Chr10:12047047|12048525	exon	0	0	371.631	0	0	500	MD10G1081900
mdm-miR169e	Chr10:13141457|13175171	intergenic_region	34.4598	0	0	28.6413	0	33714	n/a
mdm-miR169e	Chr10:13145160|13178530	intergenic_region	0	2.84227	0	0	0	33370	n/a
mdm-miR1511	Chr10:1743380|1840716	intergenic_region	47.6167	26.2228	53.5187	16.5705	13.921	97336	n/a
mdm-miR535b	Chr10:1873558|1904549	intergenic_region	0	10.1103	0	0	4.80522	30991	n/a
mdm-miR535b	Chr10:1873558|1921462	intergenic_region	0	1.78384	0	9.37488	0	47904	n/a
mdm-miR167b	Chr10:2171771|2216818	intergenic_region	0	0	0	7.54545	0	45047	n/a
mdm-miR482b	Chr10:21815848|21821847	intergenic_region	0	0	0	14.6357	0	5999	n/a
mdm-miR477a	Chr10:22162232|22237793	intergenic_region	1.28128	0	0	0	0	75561	n/a
mdm-miR319a	Chr10:24006422|24018906	intergenic_region	0	0	14.974	0	21.8135	12484	n/a
mdm-miR319a	Chr10:24006422|24018915	intergenic_region	16.8444	0	7.30354	0	0	12493	n/a
mdm-miR319a	Chr10:24006422|24019163	intergenic_region	28.9696	0	0	0	9.61839	12741	n/a
mdm-miR408a	Chr10:2563653|2574537	intergenic_region	0	51.9651	0	116.519	0	10884	n/a
mdm-miR156ad	Chr10:26678211|26707309	intergenic_region	0	0	38.546	0	0	29098	n/a
mdm-miR164b	Chr10:27461608|27509417	intergenic_region	0	0	58.2993	0	0	47809	n/a
mdm-miR164b	Chr10:27462184|27509996	intergenic_region	0	0	0	0	39.0876	47812	n/a
mdm-miR1511	Chr10:2752169|2820922	intergenic_region	0	2.24885	0	1.156	0	68753	n/a
mdm-miR1511	Chr10:2802993|2820916	intergenic_region	0	0	0	2.95628	0	17923	n/a
mdm-miR1511	Chr10:2802998|2820922	intergenic_region	0	0	0	3.26563	0	17924	n/a
mdm-miR7126	Chr10:3011660|3013003	exon	0	0	0	0	119.767	678	MD10G1024100
mdm-miR408b	Chr10:32021067|32056798	intergenic_region	0	2.65446	2.55361	0	0	35731	n/a
mdm-miR171a	Chr10:32108152|32151179	intergenic_region	0	0	0	2.72077	0	43027	n/a
mdm-miR156ad	Chr10:33586653|33685151	intergenic_region	0	0.578373	0	0	0	98498	n/a
mdm-miR393d	Chr10:33600887|33606401	intergenic_region	0	0	0	70.7862	0	5514	n/a
mdm-miR171o	Chr10:34718899|34755597	intergenic_region	0	0	35.6572	0	0	36698	n/a
mdm-miR172i	Chr10:34724230|34761064	intergenic_region	0	0	0	25.4257	0	36834	n/a
mdm-miR156t	Chr10:39461722|39511397	intergenic_region	224.697	0	14.9625	0	0	49675	n/a
mdm-miR156t	Chr10:39462916|39512577	intergenic_region	261.188	0	19.3658	0	0	49661	n/a
mdm-miR395a	Chr10:39796933|39828439	intergenic_region	0	0	0	17.698	0	31506	n/a
mdm-miR395a	Chr10:39798366|39830008	intergenic_region	0	0	0	1.84986	0	31642	n/a
mdm-miR156a	Chr10:40132275|40139896	intergenic_region	18.1621	0	66.725	0	0	7621	n/a
mdm-miR164a	Chr10:40755855|40756590	exon	0	0	0	0	356.931	455	MD10G1328100
mdm-miR319a	Chr10:41060498|41137024	intergenic_region	0	0	0	1.14732	0	76526	n/a
mdm-miR156ad	Chr10:4486623|4557651	intergenic_region	3.19938	12.4027	8.44369	9.42039	0	71028	n/a
mdm-miR156ad	Chr10:4503221|4566194	intergenic_region	0	52.8555	0	12.0835	0	62973	n/a
mdm-miR168a	Chr10:6857496|6858910	exon	0	0	0	82.1658	0	904	MD10G1051700
mdm-miR159a	Chr10:9001472|9001630	exon	0	0	1443.72	0	0	158	MD10G1065800
mdm-miR477b	Chr11:11634744|11719550	intergenic_region	1.3398	0	0	0	0	84806	n/a
mdm-miR171o	Chr11:11843726|11843888	exon	0	0	0	0	501.246	162	MD11G1130600
mdm-miR858	Chr11:12236906|12241479	exon	0	35.1008	0	0	0	1623	MD11G1133400
mdm-miR477a	Chr11:1422288|1443134	intergenic_region	0	11.3747	0	0	0	20846	n/a
mdm-miR159c	Chr11:14452616|14453703	exon	190.258	0	0	0	0	485	MD11G1151700
mdm-miR156a	Chr11:1679471|1735533	intergenic_region	64.2259	0	0	0	10.094	56062	n/a
mdm-miR156a	Chr11:1679797|1735868	intergenic_region	179.152	139.944	249.889	140.677	75.9153	56071	n/a
mdm-miR156a	Chr11:1680015|1736078	intergenic_region	46.6141	72.6171	0	0	0	56063	n/a
mdm-miR156a	Chr11:1681609|1737768	intergenic_region	30.2136	0	0	0	0	56159	n/a
mdm-miR156a	Chr11:1710608|1755310	intergenic_region	0	11.4663	0	21.6248	0	44702	n/a
mdm-miR319c	Chr11:22248049|22249316	exon	111.175	0	0	0	0	830	MD11G1181200
mdm-miR164a	Chr11:2396503|2417608	intergenic_region	0	0	0	0	43.7477	21105	n/a
mdm-miR164a	Chr11:2396885|2418141	intergenic_region	0	10.7205	0	0	0	21256	n/a
mdm-miR156a	Chr11:2667181|2760235	intergenic_region	2.55225	2.24368	0.98054	2.94019	0	93054	n/a
mdm-miR1511	Chr11:2740244|2804024	intergenic_region	0	6.9936	0	3.1235	0	63780	n/a
mdm-miR1511	Chr11:2763807|2816700	intergenic_region	0	5.9238	0	0	0	52893	n/a
mdm-miR159a	Chr11:30797696|30798343	exon	0	0	0	0	395.316	155	MD11G1210600
mdm-miR156ad	Chr11:31791852|31811729	intergenic_region	4.87069	0	0	0	0	19877	n/a
mdm-miR2111a	Chr11:36046761|36084974	intergenic_region	4.46011	0	2.38775	0	0	38213	n/a
mdm-miR159a	Chr11:3620429|3620941	exon	0	298.26	0	0	0	318	MD11G1042100
mdm-miR858	Chr11:37737860|37743964	intergenic_region	0	0	0	0	9.75876	6104	n/a
mdm-miR159a	Chr11:38217458|38218448	exon	0	86.1844	0	0	0	897	MD11G1267200
mdm-miR7124a	Chr11:38348100|38446755	intergenic_region	0.935334	0	0	0	0	98655	n/a
mdm-miR7124a	Chr11:38354166|38451712	intergenic_region	67.4935	0	18.24	0	0	97546	n/a
mdm-miR1511	Chr11:39079883|39090521	intergenic_region	0	168.423	281.084	74.8749	11.3594	10638	n/a
mdm-miR395a	Chr11:39107122|39141386	intergenic_region	72.076	0	108.398	0	9.76404	34264	n/a
mdm-miR2118a	Chr11:39878866|39888023	intergenic_region	0	16.8849	0	0	6.50513	9157	n/a
mdm-miR858	Chr11:40419400|40445690	intergenic_region	0	31.7284	0	0	0	26290	n/a
mdm-miR858	Chr11:40419658|40445929	intergenic_region	0	14.7135	0	0	0	26271	n/a
mdm-miR858	Chr11:40419658|40462533	intergenic_region	0	8.49387	0	0	0	42875	n/a
mdm-miR858	Chr11:40421088|40474906	intergenic_region	0	39.633	0	6.86332	0	53818	n/a
mdm-miR7123a	Chr11:41262269|41273109	intergenic_region	0	0	0	0	274.225	10840	n/a
mdm-miR7123a	Chr11:41267478|41268566	exon	0	0	0	0	102.294	599	MD11G1293300
mdm-miR169a	Chr11:41797904|41828936	intergenic_region	0	0	0	25.1169	0	31032	n/a
mdm-miR7124a	Chr11:42022358|42031240	intergenic_region	44.7737	83.3812	241.531	0	0	8882	n/a
mdm-miR7124a	Chr11:42023804|42032739	intergenic_region	36.1459	197.37	335.534	160.933	30.7765	8935	n/a
mdm-miR2118a	Chr11:42372632|42440407	intergenic_region	31.9842	0	0	0	0	67775	n/a
mdm-miR169c	Chr11:42441886|42525619	intergenic_region	5.51009	0	0	0	1.4228	83733	n/a
mdm-miR535a	Chr11:42579408|42599692	intergenic_region	8.4024	32.5212	0	13.2148	0	20284	n/a
mdm-miR7123a	Chr11:4304609|4373879	intergenic_region	0	0	0	1.69	0	69270	n/a
mdm-miR156aa	Chr11:5519296|5544846	intergenic_region	0	0	0	0	4.7964	25550	n/a
mdm-miR156ad	Chr11:5521319|5554909	intergenic_region	0	0	0	0	199.875	33590	n/a
mdm-miR156ad	Chr11:5523168|5572050	intergenic_region	0	8.03279	0	0	0	48882	n/a
mdm-miR156ad	Chr11:5530414|5554809	intergenic_region	0	11.0915	0	2.17198	0	24395	n/a
mdm-miR156ad	Chr11:5531285|5555482	intergenic_region	0	0	0	168.122	0	24197	n/a
mdm-miR156ad	Chr11:5532485|5556354	intergenic_region	19.8227	0	105.976	0	17.7597	23869	n/a
mdm-miR156ad	Chr11:5533285|5572050	intergenic_region	0	4.40877	0	0	0	38765	n/a
mdm-miR7122a	Chr11:5741036|5815049	intergenic_region	86.5895	0	63.1873	0	37.0083	74013	n/a
mdm-miR156ad	Chr11:5974815|6024064	intergenic_region	20.438	0	37.6859	0	6.99545	49249	n/a
mdm-miR156a	Chr11:599540|606512	intergenic_region	20.8293	149.053	0	12.5932	21.6043	6972	n/a
mdm-miR156a	Chr11:632755|686146	intergenic_region	41.2292	47.1588	56.4573	21.1511	25.1852	53391	n/a
mdm-miR156a	Chr11:632765|686146	intergenic_region	0	1.44822	0	0	0	53381	n/a
mdm-miR3627a	Chr11:6487319|6510709	intergenic_region	0	0	0	9.52688	0	23390	n/a
mdm-miR482b	Chr11:6662819|6705282	intergenic_region	2.67581	0	0	0	0	42463	n/a
mdm-miR396a	Chr11:7015956|7016654	exon	0	0	0	270.334	0	196	MD11G1082500
mdm-miR7120a	Chr11:7073712|7091073	intergenic_region	0	4.92212	0	0	0	17361	n/a
mdm-miR7120a	Chr11:7074026|7092939	intergenic_region	10.2379	123.431	6.54983	42.9581	16.1989	18913	n/a
mdm-miR7120a	Chr11:7074047|7092798	intergenic_region	6.05956	0	4.86604	0	0	18751	n/a
mdm-miR7120a	Chr11:7075111|7093866	intergenic_region	0	0	0	90.5072	0	18755	n/a
mdm-miR159c	Chr11:7369066|7467526	intergenic_region	0	19.0002	0	13.2373	0	98460	n/a
mdm-miR172a	Chr11:7930750|7945135	intergenic_region	0	5.37417	36.4833	15.4907	14.4933	14385	n/a
mdm-miR172a	Chr11:9505702|9528255	intergenic_region	0	3.42781	0	0	0	22553	n/a
mdm-miR7126	Chr12:10952268|10995635	intergenic_region	0	4.45658	0	2.69943	0	43367	n/a
mdm-miR7120a	Chr12:1492847|1513826	intergenic_region	4.61484	0	0	0	0	20979	n/a
mdm-miR535b	Chr12:20144729|20144897	exon	0	0	737.363	0	0	168	MD12G1126000
mdm-miR396c	Chr12:20174898|20227203	intergenic_region	0	0	67.6066	0	9.15281	52305	n/a
mdm-miR169c	Chr12:20179517|20249215	intergenic_region	22.6446	0	6.22069	0	0	69698	n/a
mdm-miR169c	Chr12:20180679|20246090	intergenic_region	0	0	0	3.24015	0	65411	n/a
mdm-miR169c	Chr12:20182055|20247188	intergenic_region	0	18.3677	0	0	0	65133	n/a
mdm-miR1511	Chr12:2062327|2107517	intergenic_region	0	0	0	6.57472	0	45190	n/a
mdm-miR159a	Chr12:23820547|23867159	intergenic_region	0	0	2.65762	0	0	46612	n/a
mdm-miR171a	Chr12:26023957|26037465	intergenic_region	10.7508	0	0	0	0	13508	n/a
mdm-miR7120a	Chr12:27461193|27476054	intergenic_region	0	3.83343	0	13.7855	0	14861	n/a
mdm-miR7120a	Chr12:27461571|27476305	intergenic_region	0	13.1172	0	0	0	14734	n/a
mdm-miR7120a	Chr12:27466876|27476920	intergenic_region	83.2451	0	0	0	0	10044	n/a
mdm-miR393a	Chr12:27979410|27979566	exon	0	0	0	750.425	0	156	MD12G1198800
mdm-miR172a	Chr12:28480657|28483417	intergenic_region	33.4331	0	0	0	0	2760	n/a
mdm-miR172a	Chr12:28480657|28483687	intergenic_region	0	0	30.1133	0	0	3030	n/a
mdm-miR397a	Chr12:28714615|28716377	exon	0	0	0	0	72.4665	822	MD12G1206900
mdm-miR156ad	Chr12:29289575|29343565	intergenic_region	0	1.75674	0	1.37577	0	53990	n/a
mdm-miR162a	Chr12:29505585|29530653	intergenic_region	0	4.54513	0	0	0	25068	n/a
mdm-miR1511	Chr12:30123586|30166066	intergenic_region	0	0	0	11.7121	0	42480	n/a
mdm-miR159a	Chr12:30870685|30893494	intergenic_region	0	0	0	4.64601	4.02959	22809	n/a
mdm-miR159a	Chr12:30883943|30891256	intergenic_region	0	0	25.5621	0	0	7313	n/a
mdm-miR159a	Chr12:30886223|30899028	intergenic_region	0	9.05593	0	12.4136	0	12805	n/a
mdm-miR172a	Chr12:31220764|31230772	intergenic_region	28.383	417.721	0	460.191	90.9849	10008	n/a
mdm-miR156a	Chr12:31230507|31264265	intergenic_region	9.46505	258.035	120.352	222.91	346.091	33758	n/a
mdm-miR398a	Chr12:32089492|32116617	intergenic_region	0	0	0	2.15791	0	27125	n/a
mdm-miR171a	Chr12:32230348|32252920	intergenic_region	0	0	0	0	15.1119	22572	n/a
mdm-miR171c	Chr12:32230756|32280792	intergenic_region	0	24.2746	0	3.17684	0	50036	n/a
mdm-miR171a	Chr12:32232526|32256815	intergenic_region	0	0	0	0	8.58356	24289	n/a
mdm-miR171c	Chr12:32232526|32283202	intergenic_region	0	12.3659	0	13.1917	0	50676	n/a
mdm-miR156a	Chr12:32232526|32321691	intergenic_region	0	2.55565	0	0	0	89165	n/a
mdm-miR535b	Chr12:32254802|32272048	intergenic_region	0	3.30329	0	0	0	17246	n/a
mdm-miR535b	Chr12:32255815|32292805	intergenic_region	0	6.16043	0	0	0	36990	n/a
mdm-miR535b	Chr12:32257011|32274217	intergenic_region	0	4.96646	0	0	0	17206	n/a
mdm-miR159c	Chr12:32343028|32352450	intergenic_region	0	0	0	0	6.50329	9422	n/a
mdm-miR156ad	Chr12:4271835|4293087	intergenic_region	8.01968	0	0	0	0	21252	n/a
mdm-miR535b	Chr12:5321107|5358533	intergenic_region	41.6517	0	7.31388	0	41.1646	37426	n/a
mdm-miR5225c	Chr12:5507390|5535379	intergenic_region	0	54.8321	12.5758	29.3057	3.28382	27989	n/a
mdm-miR5225c	Chr12:5509882|5537825	intergenic_region	0	44.6985	0	2.09474	0	27943	n/a
mdm-miR156ad	Chr12:584451|592651	intergenic_region	0	103.705	0	0	0	8200	n/a
mdm-miR172l	Chr12:7853291|7855489	exon	152.065	80.9502	0	0	0	955	MD12G1066600
mdm-miR482b	Chr12:7918072|7919133	exon	0	0	0	116.606	0	637	MD12G1066800
mdm-miR172a	Chr12:862094|863170	exon	559.623	0	0	112.781	0	519	MD12G1008000
mdm-miR828a	Chr13:11065166|11152437	intergenic_region	0	184.863	0	83.659	0	87271	n/a
mdm-miR828a	Chr13:11124017|11151106	intergenic_region	0	2.10302	0	0	0	27089	n/a
mdm-miR396a	Chr13:28915418|28917114	exon	57.0842	0	0	0	120.135	1696	MD13G1257100
mdm-miR858	Chr13:7519879|7537276	intergenic_region	0	179.971	0	0	0	17397	n/a
mdm-miR535b	Chr14:1672165|1701196	intergenic_region	0	96.3411	3.14296	52.4253	2.11064	29031	n/a
mdm-miR535b	Chr14:1672728|1701770	intergenic_region	0	69.6366	0	0	0	29042	n/a
mdm-miR535b	Chr14:1673084|1701985	intergenic_region	0	9.85582	0	0	0	28901	n/a
mdm-miR535b	Chr14:1674641|1703765	intergenic_region	0	4.89018	0	0	0	29124	n/a
mdm-miR535b	Chr14:1674796|1703770	intergenic_region	10.0243	0	0	0	0	28974	n/a
mdm-miR172l	Chr14:18174433|18202556	intergenic_region	0	0	0	20.7247	14.4369	28123	n/a
mdm-miR172a	Chr14:18176401|18229441	intergenic_region	145.113	0	0	0	86.0654	53040	n/a
mdm-miR172a	Chr14:18203306|18228195	intergenic_region	0	0	0	15.2865	0	24889	n/a
mdm-miR172l	Chr14:18235979|18238795	exon	0	0	0	0	101.186	1605	MD14G1113000
mdm-miR172a	Chr14:23563790|23578423	intergenic_region	0	0	0	5.07605	0	14633	n/a
mdm-miR397a	Chr14:25894429|25902683	intergenic_region	0	28.7458	22.1088	0	11.1353	8254	n/a
mdm-miR162a	Chr14:27855659|27891351	intergenic_region	9.07936	25.9452	7.66921	8.40774	0	35692	n/a
mdm-miR162a	Chr14:27856915|27892471	intergenic_region	11.1846	0	0	0	0	35556	n/a
mdm-miR162a	Chr14:27871972|27889166	intergenic_region	113.064	0	96.426	0	90.7838	17194	n/a
mdm-miR171a	Chr14:2928713|2933742	intergenic_region	0	175.172	0	22.1549	0	5029	n/a
mdm-miR156a	Chr14:30426729|30453536	intergenic_region	0	131.215	1628.2	0	27.4289	26807	n/a
mdm-miR159c	Chr14:31807577|31807758	exon	0	314.744	0	0	0	181	MD14G1238900
mdm-miR171a	Chr14:6415955|6422790	intergenic_region	0	13.8766	0	0	0	6835	n/a
mdm-miR162a	Chr14:7423187|7463471	intergenic_region	0	2.87859	0	0	0	40284	n/a
mdm-miR393a	Chr14:759922|762654	exon	221.524	0	0	0	0	2733	MD14G1007200
mdm-miR172i	Chr14:9148152|9165140	intergenic_region	0	73.12	0	13.2924	117.754	16988	n/a
mdm-miR396b	Chr15:10036686|10064531	intergenic_region	0	0	3.27682	0	0	27845	n/a
mdm-miR172a	Chr15:10848353|10853630	intergenic_region	68.9907	0	215.778	0	118.133	5277	n/a
mdm-miR164b	Chr15:1730367|1774720	intergenic_region	0	0	0	18.5168	0	44353	n/a
mdm-miR482b	Chr15:2478966|2486030	intergenic_region	0	557.21	0	0	0	7064	n/a
mdm-miR482b	Chr15:2481338|2493691	intergenic_region	0	0	0	736.586	0	12353	n/a
mdm-miR156ad	Chr15:27191276|27192061	intron	0	72.5715	0	0	0	785	MD15G1293600
mdm-miR477a	Chr15:34495858|34527067	intergenic_region	0	4.95418	0	0	0	31209	n/a
mdm-miR535b	Chr15:36463302|36465901	exon	0	0	0	155.881	0	751	MD15G1330500
mdm-miR172i	Chr15:37593355|37601680	intergenic_region	0	0	0	0	7.15525	8325	n/a
mdm-miR156ad	Chr15:41249981|41329918	intergenic_region	0	0	0	0	1.14979	79937	n/a
mdm-miR156ad	Chr15:41250316|41330614	intergenic_region	1.41502	0	0	0	0	80298	n/a
mdm-miR172d	Chr15:41329708|41345420	intergenic_region	2053.93	181.067	943.234	0	781.622	15712	n/a
mdm-miR172d	Chr15:41330444|41345420	intergenic_region	0	0	0	0	5.42213	14976	n/a
mdm-miR172d	Chr15:41332138|41349727	intergenic_region	0	0	21.1286	4.22297	0	17589	n/a
mdm-miR1511	Chr15:41841005|41914332	intergenic_region	0	0	6.37335	6.36148	0	73327	n/a
mdm-miR1511	Chr15:46185837|46223521	intergenic_region	0	19.5399	0	11.2051	0	37684	n/a
mdm-miR477a	Chr15:473999|497315	intergenic_region	0	61.4709	0	24.5095	0	23316	n/a
mdm-miR535b	Chr15:50024231|50025329	exon	0	0	399.603	0	0	310	MD15G1399400
mdm-miR171a	Chr15:50232609|50268320	intergenic_region	0	0	0	0	9.09545	35711	n/a
mdm-miR171a	Chr15:50753091|50776899	intergenic_region	0	0	13.5534	0	0	23808	n/a
mdm-miR171a	Chr15:50753944|50777758	intergenic_region	0	2.39223	0	0	0	23814	n/a
mdm-miR172l	Chr15:51235394|51299792	intergenic_region	0	9.00348	0	31.6487	0	64398	n/a
mdm-miR172l	Chr15:51271129|51296179	intergenic_region	9.39033	0	14.7027	10.922	0	25050	n/a
mdm-miR164b	Chr15:51607417|51648590	intergenic_region	0	17.4053	0	12.8943	0	41173	n/a
mdm-miR156ad	Chr15:52456155|52456605	exon	0	0	0	544.559	0	341	MD15G1423200
mdm-miR156t	Chr15:53048018|53086402	intergenic_region	4.92627	4.45253	7.21807	0	3.10377	38384	n/a
mdm-miR156t	Chr15:53053157|53087549	intergenic_region	0	6.89452	0	3.08126	0	34392	n/a
mdm-miR172a	Chr15:54077583|54082518	intergenic_region	0	0	81.921	48.9475	12.4162	4935	n/a
mdm-miR169e	Chr15:5911300|5919459	intergenic_region	0	0	0	40.9671	0	8159	n/a
mdm-miR167a	Chr15:7110101|7200216	intergenic_region	1.61152	0	94.6602	0	0	90115	n/a
mdm-miR482d	Chr15:7860605|7920865	intergenic_region	3.06257	9.6486	5.13927	0	0	60260	n/a
mdm-miR172i	Chr15:952194|1045365	intergenic_region	0	0	0	1.99305	0	93171	n/a
mdm-miR167b	Chr16:10347354|10371280	intergenic_region	0	9.52414	0	0	0	23926	n/a
mdm-miR167b	Chr16:10348540|10372674	intergenic_region	0	3.54077	0	0	0	24134	n/a
mdm-miR535b	Chr16:11267911|11350971	intergenic_region	4.10388	0	0	0	0	83060	n/a
mdm-miR535b	Chr16:11281066|11360563	intergenic_region	0	0	9.18205	0	24.962	79497	n/a
mdm-miR535b	Chr16:11282607|11362069	intergenic_region	0	0	4.59305	0	0	79462	n/a
mdm-miR535b	Chr16:11296515|11372926	intergenic_region	0	0	0	0	7.79567	76411	n/a
mdm-miR156aa	Chr16:11309853|11381674	intergenic_region	39.8287	20.6233	0	0	0	71821	n/a
mdm-miR156aa	Chr16:11310656|11382354	intergenic_region	0	0	0	17.6117	0	71698	n/a
mdm-miR7125	Chr16:11542773|11549164	intergenic_region	0	0	0	0	116.507	6391	n/a
mdm-miR7126	Chr16:11994397|11999299	intergenic_region	0	0	0	11.9407	0	4902	n/a
mdm-miR7120a	Chr16:14069762|14146112	intergenic_region	203.825	171.813	186.456	158.289	139.684	76350	n/a
mdm-miR172a	Chr16:15351492|15373764	intergenic_region	57.6531	0	0	0	284.694	22272	n/a
mdm-miR167b	Chr16:15626891|15631408	intergenic_region	0	0	0	0	128.869	4517	n/a
mdm-miR156a	Chr16:16079478|16080208	exon	252.118	0	0	0	0	549	MD16G1186300
mdm-miR319a	Chr16:1771744|1829401	intergenic_region	0	0	0	0	8706.54	57657	n/a
mdm-miR319a	Chr16:1771744|1855954	intergenic_region	12.0717	7.10332	0	0	1624.4	84210	n/a
mdm-miR156aa	Chr16:19424439|19486220	intergenic_region	254.505	70.4849	35.2765	15.5104	0	61781	n/a
mdm-miR156aa	Chr16:19426565|19487929	intergenic_region	1354.12	0	0	0	0	61364	n/a
mdm-miR156aa	Chr16:19427301|19488701	intergenic_region	9987.62	121.814	403.461	0	0	61400	n/a
mdm-miR156aa	Chr16:19427656|19489135	intergenic_region	4.09954	0	0	0	0	61479	n/a
mdm-miR156aa	Chr16:19427701|19489181	intergenic_region	68.1929	0	0	0	0	61480	n/a
mdm-miR7126	Chr16:22424581|22428936	intergenic_region	39.1353	0	56.8895	24.3331	0	4355	n/a
mdm-miR7124a	Chr16:38705760|38706006	intron	0	0	0	0	484.288	246	MD16G1282700
mdm-miR167b	Chr16:3935931|4007784	intergenic_region	0	43.8175	72.7414	46.2106	0	71853	n/a
mdm-miR7122a	Chr16:5772998|5789430	intergenic_region	0	50.4892	0	0	0	16432	n/a
mdm-miR7122a	Chr16:5773085|5789517	intergenic_region	0	0	15.0775	0	5.59341	16432	n/a
mdm-miR7122a	Chr16:5773884|5790293	intergenic_region	0	73.1173	0	11.3166	0	16409	n/a
mdm-miR7122a	Chr16:5774543|5790953	intergenic_region	11.5229	44.8243	42.1083	8.07212	0	16410	n/a
mdm-miR7122a	Chr16:5782987|5793303	intergenic_region	337.831	460.972	529.6	323.632	32.2548	10316	n/a
mdm-miR7122a	Chr16:7154805|7154973	intron	0	0	0	348.412	0	168	MD16G1102300
mdm-miR535b	Chr17:10635211|10667222	intergenic_region	0	608.508	0	796.256	0	32011	n/a
mdm-miR535b	Chr17:10635463|10667592	intergenic_region	25.6418	28.5301	2.8399	32.5406	9.53562	32129	n/a
mdm-miR535b	Chr17:10637154|10685824	intergenic_region	0	1.17051	0	8.44788	0	48670	n/a
mdm-miR535b	Chr17:10638520|10687189	intergenic_region	4.66921	1.17053	3.84095	0	0	48669	n/a
mdm-miR535b	Chr17:10639152|10687189	intergenic_region	0	0	0	9.83757	0	48037	n/a
mdm-miR395a	Chr17:14900486|14938412	intergenic_region	2.55273	4.00293	4.81164	27.149	1.61562	37926	n/a
mdm-miR396c	Chr17:15075864|15079654	exon	0	0	157.86	0	0	578	MD17G1156800
mdm-miR482b	Chr17:1815159|1877319	intergenic_region	3.7112	1.24368	5.97886	4.10357	3.3952	62160	n/a
mdm-miR482b	Chr17:1833957|1877576	intergenic_region	3.32933	0	9.56619	0	0	43619	n/a
mdm-miR391	Chr17:28605413|28689442	intergenic_region	0	0	18.2206	0	0	84029	n/a
mdm-miR156t	Chr17:28653567|28744487	intergenic_region	2.66209	0	127.339	0	5.70966	90920	n/a
mdm-miR156t	Chr17:28653811|28745675	intergenic_region	0	0	69.0208	0	9.98078	91864	n/a
mdm-miR164a	Chr17:28747966|28760545	intergenic_region	0	0	0	4.21221	0	12579	n/a
mdm-miR1511	Chr17:29681770|29695849	intergenic_region	0	0	0	7.91369	0	14079	n/a
mdm-miR1511	Chr17:29681770|29701399	intergenic_region	4.70097	11.6727	63.942	0	8.68883	19629	n/a
mdm-miR1511	Chr17:29681770|29701402	intergenic_region	0	4.35274	0	2.69893	0	19632	n/a
mdm-miR1511	Chr17:29681770|29701464	intergenic_region	30.4302	12.5247	66.0475	0	76.1482	19694	n/a
mdm-miR1511	Chr17:29681770|29701556	intergenic_region	0	0	0	5.63109	0	19786	n/a
mdm-miR1511	Chr17:29686140|29695849	intergenic_region	183.912	19.5379	42.6329	77.0712	0	9709	n/a
mdm-miR172l	Chr17:32635930|32639418	intergenic_region	1028.99	552.272	1224.57	450.148	228.372	3488	n/a
mdm-miR7122a	Chr17:33668625|33750365	intergenic_region	0	0	0	0.972328	0	81740	n/a
mdm-miR7122a	Chr17:33670251|33751637	intergenic_region	0	0	2.24223	0	0	81386	n/a
mdm-miR156ad	Chr17:33675991|33709709	intergenic_region	6.8417	0	0	0	0	33718	n/a
mdm-miR156ad	Chr17:3477303|3497377	intergenic_region	0	0	0	0	12.1354	20074	n/a
mdm-miR159a	Chr17:4219563|4219720	exon	0	362.857	0	0	0	157	MD17G1054600
mdm-miR167b	Chr17:5112775|5184546	intergenic_region	0	0	0	1.10738	0	71771	n/a
mdm-miR167b	Chr17:5113052|5169977	intergenic_region	0	0	0	2.57063	0	56925	n/a
mdm-miR167b	Chr17:5113052|5184823	intergenic_region	0	0	0	0	2.83889	71771	n/a
mdm-miR156a	Chr17:6296154|6327108	intergenic_region	0	0	32.4247	0	0	30954	n/a
mdm-miR156p	Chr17:6388069|6451249	intergenic_region	0	1.50121	34.7773	0	0	63180	n/a
mdm-miR156aa	Chr17:6430123|6449860	intergenic_region	0	2.88639	0	0	0	19737	n/a
mdm-miR156aa	Chr17:6430776|6452001	intergenic_region	0	0	120.368	0	0	21225	n/a
mdm-miR858	Chr17:8455803|8470841	intergenic_region	0	0	0	0	10.7996	15038	n/a
mdm-miR858	Chr17:8456475|8471431	intergenic_region	110.159	0	0	0	0	14956	n/a
mdm-miR399e	Chr17:8467374|8515771	intergenic_region	0	0	0	2.30214	0	48397	n/a
