# Supplementary material for: Expression Characteristics in Roots, Phloem, Leaves, Flowers and Fruits of Apple circRNA
Source: Genes (Basel). 2022 Apr 18;13(4):712. doi: 10.3390/genes13040712 (PMC9030095; doi:10.3390/genes13040712)
Supplement: Supplementary file 1 [file genes-13-00712-s001.zip › Table S10.xlsx]

## Sheet: Sheet1
Table S10 Interactions between circRNAs and miRNAs
Code	miRNA	Target
1	mdm-miR172a	Chr00:15360703|15361191
2	mdm-miR172b	Chr00:15360703|15361191
3	mdm-miR172c	Chr00:15360703|15361191
4	mdm-miR172d	Chr00:15360703|15361191
5	mdm-miR172e	Chr00:15360703|15361191
6	mdm-miR172f	Chr00:15360703|15361191
7	mdm-miR172g	Chr00:15360703|15361191
8	mdm-miR172h	Chr00:15360703|15361191
9	mdm-miR171f	Chr00:15611951|15612116
10	mdm-miR171g	Chr00:15611951|15612116
11	mdm-miR171h	Chr00:15611951|15612116
12	mdm-miR171m	Chr00:15611951|15612116
13	mdm-miR171n	Chr00:15611951|15612116
14	mdm-miR160a	Chr00:18744402|18744580
15	mdm-miR160b	Chr00:18744402|18744580
16	mdm-miR160c	Chr00:18744402|18744580
17	mdm-miR160d	Chr00:18744402|18744580
18	mdm-miR160e	Chr00:18744402|18744580
19	mdm-miR1511	Chr00:4463123|4512033
20	mdm-miR167b	Chr00:4463123|4512033
21	mdm-miR167c	Chr00:4463123|4512033
22	mdm-miR167d	Chr00:4463123|4512033
23	mdm-miR167e	Chr00:4463123|4512033
24	mdm-miR167f	Chr00:4463123|4512033
25	mdm-miR167g	Chr00:4463123|4512033
26	mdm-miR7120a	Chr00:6748728|6749665
27	mdm-miR7120b	Chr00:6748728|6749665
28	mdm-miR7120a	Chr00:6748728|6751911
29	mdm-miR7120b	Chr00:6748728|6751911
30	mdm-miR159c	Chr00:814894|824208
31	mdm-miR3627a	Chr01:16171090|16204711
32	mdm-miR3627b	Chr01:16171090|16204711
33	mdm-miR3627c	Chr01:16171090|16204711
34	mdm-miR7125	Chr01:16726070|16816501
35	mdm-miR171o	Chr01:17783277|17785127
36	mdm-miR172a	Chr01:20773825|20845894
37	mdm-miR172b	Chr01:20773825|20845894
38	mdm-miR172c	Chr01:20773825|20845894
39	mdm-miR172l	Chr01:20773825|20845894
40	mdm-miR172m	Chr01:20773825|20845894
41	mdm-miR172n	Chr01:20773825|20845894
42	mdm-miR172o	Chr01:20773825|20845894
43	mdm-miR172a	Chr01:20780433|20826822
44	mdm-miR172b	Chr01:20780433|20826822
45	mdm-miR172c	Chr01:20780433|20826822
46	mdm-miR172l	Chr01:20780433|20826822
47	mdm-miR172m	Chr01:20780433|20826822
48	mdm-miR172n	Chr01:20780433|20826822
49	mdm-miR172o	Chr01:20780433|20826822
50	mdm-miR172a	Chr01:20780433|20878427
51	mdm-miR172b	Chr01:20780433|20878427
52	mdm-miR172c	Chr01:20780433|20878427
53	mdm-miR172l	Chr01:20780433|20878427
54	mdm-miR172m	Chr01:20780433|20878427
55	mdm-miR172n	Chr01:20780433|20878427
56	mdm-miR172o	Chr01:20780433|20878427
57	mdm-miR172a	Chr01:20781320|20827613
58	mdm-miR172b	Chr01:20781320|20827613
59	mdm-miR172c	Chr01:20781320|20827613
60	mdm-miR172l	Chr01:20781320|20827613
61	mdm-miR172m	Chr01:20781320|20827613
62	mdm-miR172n	Chr01:20781320|20827613
63	mdm-miR172o	Chr01:20781320|20827613
64	mdm-miR172a	Chr01:20782433|20828279
65	mdm-miR172b	Chr01:20782433|20828279
66	mdm-miR172c	Chr01:20782433|20828279
67	mdm-miR172l	Chr01:20782433|20828279
68	mdm-miR172m	Chr01:20782433|20828279
69	mdm-miR172n	Chr01:20782433|20828279
70	mdm-miR172o	Chr01:20782433|20828279
71	mdm-miR172a	Chr01:21162286|21214009
72	mdm-miR172b	Chr01:21162286|21214009
73	mdm-miR172c	Chr01:21162286|21214009
74	mdm-miR172d	Chr01:21162286|21214009
75	mdm-miR172e	Chr01:21162286|21214009
76	mdm-miR172f	Chr01:21162286|21214009
77	mdm-miR172g	Chr01:21162286|21214009
78	mdm-miR172h	Chr01:21162286|21214009
79	mdm-miR156aa	Chr01:22950168|23000795
80	mdm-miR156ab	Chr01:22950168|23000795
81	mdm-miR156ac	Chr01:22950168|23000795
82	mdm-miR156p	Chr01:22950168|23000795
83	mdm-miR156q	Chr01:22950168|23000795
84	mdm-miR156r	Chr01:22950168|23000795
85	mdm-miR156s	Chr01:22950168|23000795
86	mdm-miR156x	Chr01:22950168|23000795
87	mdm-miR156y	Chr01:22950168|23000795
88	mdm-miR156z	Chr01:22950168|23000795
89	mdm-miR396f	Chr01:23040640|23086307
90	mdm-miR396g	Chr01:23040640|23086307
91	mdm-miR408b	Chr01:23040640|23086307
92	mdm-miR408c	Chr01:23040640|23086307
93	mdm-miR408d	Chr01:23040640|23086307
94	mdm-miR1511	Chr01:23157454|23211183
95	mdm-miR171o	Chr01:23157454|23211183
96	mdm-miR156ad	Chr01:23467475|23491416
97	mdm-miR156ae	Chr01:23467475|23491416
98	mdm-miR171a	Chr01:24630211|24723522
99	mdm-miR171b	Chr01:24630211|24723522
100	mdm-miR399a	Chr01:24630211|24723522
101	mdm-miR399b	Chr01:24630211|24723522
102	mdm-miR399c	Chr01:24630211|24723522
103	mdm-miR391	Chr01:25914989|25925094
104	mdm-miR7124a	Chr01:27381079|27387550
105	mdm-miR7124b	Chr01:27381079|27387550
106	mdm-miR7124a	Chr01:27382001|27388581
107	mdm-miR7124b	Chr01:27382001|27388581
108	mdm-miR171g	Chr01:27862337|27920944
109	mdm-miR171h	Chr01:27862337|27920944
110	mdm-miR171g	Chr01:27862348|27920944
111	mdm-miR171h	Chr01:27862348|27920944
112	mdm-miR171g	Chr01:27862386|27920944
113	mdm-miR171h	Chr01:27862386|27920944
114	mdm-miR171g	Chr01:27863190|27921821
115	mdm-miR171h	Chr01:27863190|27921821
116	mdm-miR171g	Chr01:27863853|27921821
117	mdm-miR171h	Chr01:27863853|27921821
118	mdm-miR171g	Chr01:27864101|27921821
119	mdm-miR171h	Chr01:27864101|27921821
120	mdm-miR1511	Chr01:27874125|27951720
121	mdm-miR171g	Chr01:27874125|27951720
122	mdm-miR171h	Chr01:27874125|27951720
123	mdm-miR535a	Chr01:27874125|27951720
124	mdm-miR156ad	Chr01:27955023|27993092
125	mdm-miR156ae	Chr01:27955023|27993092
126	mdm-miR156ad	Chr01:27955213|27993150
127	mdm-miR156ae	Chr01:27955213|27993150
128	mdm-miR1511	Chr01:28303727|28375275
129	mdm-miR169e	Chr01:28802764|28882551
130	mdm-miR169f	Chr01:28802764|28882551
131	mdm-miR477a	Chr01:28802764|28882551
132	mdm-miR7128	Chr01:28802764|28882551
133	mdm-miR7126	Chr01:30563610|30565736
134	mdm-miR156aa	Chr01:30564018|30584622
135	mdm-miR156ab	Chr01:30564018|30584622
136	mdm-miR156ac	Chr01:30564018|30584622
137	mdm-miR156p	Chr01:30564018|30584622
138	mdm-miR156q	Chr01:30564018|30584622
139	mdm-miR156r	Chr01:30564018|30584622
140	mdm-miR156s	Chr01:30564018|30584622
141	mdm-miR156x	Chr01:30564018|30584622
142	mdm-miR156y	Chr01:30564018|30584622
143	mdm-miR156z	Chr01:30564018|30584622
144	mdm-miR162a	Chr01:30955993|31005215
145	mdm-miR162b	Chr01:30955993|31005215
146	mdm-miR162a	Chr01:30957205|31007243
147	mdm-miR162b	Chr01:30957205|31007243
148	mdm-miR1511	Chr01:32266674|32283069
149	mdm-miR164a	Chr01:32457909|32471620
150	mdm-miR164b	Chr01:32457909|32471620
151	mdm-miR164c	Chr01:32457909|32471620
152	mdm-miR164d	Chr01:32457909|32471620
153	mdm-miR164e	Chr01:32457909|32471620
154	mdm-miR164f	Chr01:32457909|32471620
155	mdm-miR164a	Chr01:32468531|32479579
156	mdm-miR164b	Chr01:32468531|32479579
157	mdm-miR164c	Chr01:32468531|32479579
158	mdm-miR164d	Chr01:32468531|32479579
159	mdm-miR164e	Chr01:32468531|32479579
160	mdm-miR164f	Chr01:32468531|32479579
161	mdm-miR156t	Chr02:12203359|12210314
162	mdm-miR156u	Chr02:12203359|12210314
163	mdm-miR156v	Chr02:12203359|12210314
164	mdm-miR156w	Chr02:12203359|12210314
165	mdm-miR156t	Chr02:12203527|12210501
166	mdm-miR156u	Chr02:12203527|12210501
167	mdm-miR156v	Chr02:12203527|12210501
168	mdm-miR156w	Chr02:12203527|12210501
169	mdm-miR156t	Chr02:12203645|12210619
170	mdm-miR156u	Chr02:12203645|12210619
171	mdm-miR156v	Chr02:12203645|12210619
172	mdm-miR156w	Chr02:12203645|12210619
173	mdm-miR156t	Chr02:12203931|12210910
174	mdm-miR156u	Chr02:12203931|12210910
175	mdm-miR156v	Chr02:12203931|12210910
176	mdm-miR156w	Chr02:12203931|12210910
177	mdm-miR156t	Chr02:12204593|12211630
178	mdm-miR156u	Chr02:12204593|12211630
179	mdm-miR156v	Chr02:12204593|12211630
180	mdm-miR156w	Chr02:12204593|12211630
181	mdm-miR156t	Chr02:12205064|12219229
182	mdm-miR156u	Chr02:12205064|12219229
183	mdm-miR156v	Chr02:12205064|12219229
184	mdm-miR156w	Chr02:12205064|12219229
185	mdm-miR156t	Chr02:12205064|12219238
186	mdm-miR156u	Chr02:12205064|12219238
187	mdm-miR156v	Chr02:12205064|12219238
188	mdm-miR156w	Chr02:12205064|12219238
189	mdm-miR7122a	Chr02:13581505|13583167
190	mdm-miR7122b	Chr02:13581505|13583167
191	mdm-miR156ad	Chr02:1414473|1439751
192	mdm-miR156ae	Chr02:1414473|1439751
193	mdm-miR171o	Chr02:17754974|17810547
194	mdm-miR167a	Chr02:18770855|18856902
195	mdm-miR169e	Chr02:20212690|20212843
196	mdm-miR169f	Chr02:20212690|20212843
197	mdm-miR156a	Chr02:2240671|2253520
198	mdm-miR156aa	Chr02:2240671|2253520
199	mdm-miR156b	Chr02:2240671|2253520
200	mdm-miR156c	Chr02:2240671|2253520
201	mdm-miR156d	Chr02:2240671|2253520
202	mdm-miR156e	Chr02:2240671|2253520
203	mdm-miR156f	Chr02:2240671|2253520
204	mdm-miR156g	Chr02:2240671|2253520
205	mdm-miR156h	Chr02:2240671|2253520
206	mdm-miR156i	Chr02:2240671|2253520
207	mdm-miR156j	Chr02:2240671|2253520
208	mdm-miR156k	Chr02:2240671|2253520
209	mdm-miR156l	Chr02:2240671|2253520
210	mdm-miR156m	Chr02:2240671|2253520
211	mdm-miR156n	Chr02:2240671|2253520
212	mdm-miR156o	Chr02:2240671|2253520
213	mdm-miR156t	Chr02:2240671|2253520
214	mdm-miR156u	Chr02:2240671|2253520
215	mdm-miR156v	Chr02:2240671|2253520
216	mdm-miR156w	Chr02:2240671|2253520
217	mdm-miR156x	Chr02:2240671|2253520
218	mdm-miR156y	Chr02:2240671|2253520
219	mdm-miR156z	Chr02:2240671|2253520
220	mdm-miR159c	Chr02:28225749|28248402
221	mdm-miR156ad	Chr02:30310245|30403956
222	mdm-miR156ae	Chr02:30310245|30403956
223	mdm-miR396f	Chr02:30310245|30403956
224	mdm-miR396g	Chr02:30310245|30403956
225	mdm-miR7120a	Chr02:30310245|30403956
226	mdm-miR7120b	Chr02:30310245|30403956
227	mdm-miR156ad	Chr02:30311906|30404274
228	mdm-miR156ae	Chr02:30311906|30404274
229	mdm-miR396f	Chr02:30311906|30404274
230	mdm-miR396g	Chr02:30311906|30404274
231	mdm-miR7120a	Chr02:30311906|30404274
232	mdm-miR7120b	Chr02:30311906|30404274
233	mdm-miR156ad	Chr02:30540587|30586354
234	mdm-miR156ae	Chr02:30540587|30586354
235	mdm-miR535b	Chr02:30540587|30586354
236	mdm-miR535c	Chr02:30540587|30586354
237	mdm-miR164a	Chr02:31360307|31404547
238	mdm-miR172a	Chr02:31360307|31404547
239	mdm-miR172b	Chr02:31360307|31404547
240	mdm-miR172c	Chr02:31360307|31404547
241	mdm-miR172d	Chr02:31360307|31404547
242	mdm-miR172e	Chr02:31360307|31404547
243	mdm-miR172f	Chr02:31360307|31404547
244	mdm-miR172g	Chr02:31360307|31404547
245	mdm-miR172h	Chr02:31360307|31404547
246	mdm-miR393d	Chr02:31360307|31404547
247	mdm-miR393e	Chr02:31360307|31404547
248	mdm-miR393f	Chr02:31360307|31404547
249	mdm-miR164a	Chr02:31360482|31404191
250	mdm-miR172a	Chr02:31360482|31404191
251	mdm-miR172b	Chr02:31360482|31404191
252	mdm-miR172c	Chr02:31360482|31404191
253	mdm-miR172d	Chr02:31360482|31404191
254	mdm-miR172e	Chr02:31360482|31404191
255	mdm-miR172f	Chr02:31360482|31404191
256	mdm-miR172g	Chr02:31360482|31404191
257	mdm-miR172h	Chr02:31360482|31404191
258	mdm-miR393d	Chr02:31360482|31404191
259	mdm-miR393e	Chr02:31360482|31404191
260	mdm-miR393f	Chr02:31360482|31404191
261	mdm-miR164a	Chr02:31360536|31404777
262	mdm-miR172a	Chr02:31360536|31404777
263	mdm-miR172b	Chr02:31360536|31404777
264	mdm-miR172c	Chr02:31360536|31404777
265	mdm-miR172d	Chr02:31360536|31404777
266	mdm-miR172e	Chr02:31360536|31404777
267	mdm-miR172f	Chr02:31360536|31404777
268	mdm-miR172g	Chr02:31360536|31404777
269	mdm-miR172h	Chr02:31360536|31404777
270	mdm-miR393d	Chr02:31360536|31404777
271	mdm-miR393e	Chr02:31360536|31404777
272	mdm-miR393f	Chr02:31360536|31404777
273	mdm-miR164a	Chr02:31360796|31405037
274	mdm-miR172a	Chr02:31360796|31405037
275	mdm-miR172b	Chr02:31360796|31405037
276	mdm-miR172c	Chr02:31360796|31405037
277	mdm-miR172d	Chr02:31360796|31405037
278	mdm-miR172e	Chr02:31360796|31405037
279	mdm-miR172f	Chr02:31360796|31405037
280	mdm-miR172g	Chr02:31360796|31405037
281	mdm-miR172h	Chr02:31360796|31405037
282	mdm-miR393d	Chr02:31360796|31405037
283	mdm-miR393e	Chr02:31360796|31405037
284	mdm-miR393f	Chr02:31360796|31405037
285	mdm-miR164a	Chr02:31364292|31392613
286	mdm-miR393d	Chr02:31364292|31392613
287	mdm-miR393e	Chr02:31364292|31392613
288	mdm-miR393f	Chr02:31364292|31392613
289	mdm-miR164a	Chr02:31366498|31401832
290	mdm-miR393d	Chr02:31366498|31401832
291	mdm-miR393e	Chr02:31366498|31401832
292	mdm-miR393f	Chr02:31366498|31401832
293	mdm-miR164a	Chr02:31367894|31403292
294	mdm-miR172a	Chr02:31367894|31403292
295	mdm-miR172b	Chr02:31367894|31403292
296	mdm-miR172c	Chr02:31367894|31403292
297	mdm-miR172d	Chr02:31367894|31403292
298	mdm-miR172e	Chr02:31367894|31403292
299	mdm-miR172f	Chr02:31367894|31403292
300	mdm-miR172g	Chr02:31367894|31403292
301	mdm-miR172h	Chr02:31367894|31403292
302	mdm-miR393d	Chr02:31367894|31403292
303	mdm-miR393e	Chr02:31367894|31403292
304	mdm-miR393f	Chr02:31367894|31403292
305	mdm-miR171c	Chr02:31595257|31603644
306	mdm-miR171d	Chr02:31595257|31603644
307	mdm-miR171e	Chr02:31595257|31603644
308	mdm-miR162a	Chr02:31783073|31800852
309	mdm-miR162b	Chr02:31783073|31800852
310	mdm-miR162a	Chr02:31783350|31801020
311	mdm-miR162b	Chr02:31783350|31801020
312	mdm-miR396b	Chr02:32119228|32131999
313	mdm-miR156a	Chr02:3284076|3352367
314	mdm-miR156ad	Chr02:3284076|3352367
315	mdm-miR156ae	Chr02:3284076|3352367
316	mdm-miR156b	Chr02:3284076|3352367
317	mdm-miR156c	Chr02:3284076|3352367
318	mdm-miR156d	Chr02:3284076|3352367
319	mdm-miR156e	Chr02:3284076|3352367
320	mdm-miR156f	Chr02:3284076|3352367
321	mdm-miR156g	Chr02:3284076|3352367
322	mdm-miR156h	Chr02:3284076|3352367
323	mdm-miR156i	Chr02:3284076|3352367
324	mdm-miR156j	Chr02:3284076|3352367
325	mdm-miR156k	Chr02:3284076|3352367
326	mdm-miR156l	Chr02:3284076|3352367
327	mdm-miR156m	Chr02:3284076|3352367
328	mdm-miR156n	Chr02:3284076|3352367
329	mdm-miR156o	Chr02:3284076|3352367
330	mdm-miR171a	Chr02:3284076|3352367
331	mdm-miR171b	Chr02:3284076|3352367
332	mdm-miR156a	Chr02:3284076|3352374
333	mdm-miR156ad	Chr02:3284076|3352374
334	mdm-miR156ae	Chr02:3284076|3352374
335	mdm-miR156b	Chr02:3284076|3352374
336	mdm-miR156c	Chr02:3284076|3352374
337	mdm-miR156d	Chr02:3284076|3352374
338	mdm-miR156e	Chr02:3284076|3352374
339	mdm-miR156f	Chr02:3284076|3352374
340	mdm-miR156g	Chr02:3284076|3352374
341	mdm-miR156h	Chr02:3284076|3352374
342	mdm-miR156i	Chr02:3284076|3352374
343	mdm-miR156j	Chr02:3284076|3352374
344	mdm-miR156k	Chr02:3284076|3352374
345	mdm-miR156l	Chr02:3284076|3352374
346	mdm-miR156m	Chr02:3284076|3352374
347	mdm-miR156n	Chr02:3284076|3352374
348	mdm-miR156o	Chr02:3284076|3352374
349	mdm-miR171a	Chr02:3284076|3352374
350	mdm-miR171b	Chr02:3284076|3352374
351	mdm-miR156a	Chr02:3289984|3364703
352	mdm-miR156ad	Chr02:3289984|3364703
353	mdm-miR156ae	Chr02:3289984|3364703
354	mdm-miR156b	Chr02:3289984|3364703
355	mdm-miR156c	Chr02:3289984|3364703
356	mdm-miR156d	Chr02:3289984|3364703
357	mdm-miR156e	Chr02:3289984|3364703
358	mdm-miR156f	Chr02:3289984|3364703
359	mdm-miR156g	Chr02:3289984|3364703
360	mdm-miR156h	Chr02:3289984|3364703
361	mdm-miR156i	Chr02:3289984|3364703
362	mdm-miR156j	Chr02:3289984|3364703
363	mdm-miR156k	Chr02:3289984|3364703
364	mdm-miR156l	Chr02:3289984|3364703
365	mdm-miR156m	Chr02:3289984|3364703
366	mdm-miR156n	Chr02:3289984|3364703
367	mdm-miR156o	Chr02:3289984|3364703
368	mdm-miR171a	Chr02:3289984|3364703
369	mdm-miR171b	Chr02:3289984|3364703
370	mdm-miR477b	Chr02:3348216|3384556
371	mdm-miR166a	Chr02:35452744|35460296
372	mdm-miR166b	Chr02:35452744|35460296
373	mdm-miR166c	Chr02:35452744|35460296
374	mdm-miR166d	Chr02:35452744|35460296
375	mdm-miR166e	Chr02:35452744|35460296
376	mdm-miR166f	Chr02:35452744|35460296
377	mdm-miR166g	Chr02:35452744|35460296
378	mdm-miR166h	Chr02:35452744|35460296
379	mdm-miR166i	Chr02:35452744|35460296
380	mdm-miR166a	Chr02:35452920|35460472
381	mdm-miR166b	Chr02:35452920|35460472
382	mdm-miR166c	Chr02:35452920|35460472
383	mdm-miR166d	Chr02:35452920|35460472
384	mdm-miR166e	Chr02:35452920|35460472
385	mdm-miR166f	Chr02:35452920|35460472
386	mdm-miR166g	Chr02:35452920|35460472
387	mdm-miR166h	Chr02:35452920|35460472
388	mdm-miR166i	Chr02:35452920|35460472
389	mdm-miR166a	Chr02:35453386|35460938
390	mdm-miR166b	Chr02:35453386|35460938
391	mdm-miR166c	Chr02:35453386|35460938
392	mdm-miR166d	Chr02:35453386|35460938
393	mdm-miR166e	Chr02:35453386|35460938
394	mdm-miR166f	Chr02:35453386|35460938
395	mdm-miR166g	Chr02:35453386|35460938
396	mdm-miR166h	Chr02:35453386|35460938
397	mdm-miR166i	Chr02:35453386|35460938
398	mdm-miR172a	Chr02:35612915|35623283
399	mdm-miR172b	Chr02:35612915|35623283
400	mdm-miR172c	Chr02:35612915|35623283
401	mdm-miR171a	Chr02:35643531|35660206
402	mdm-miR171b	Chr02:35643531|35660206
403	mdm-miR5225a	Chr02:35690967|35783690
404	mdm-miR5225b	Chr02:35690967|35783690
405	mdm-miR5225a	Chr02:35719120|35742554
406	mdm-miR5225b	Chr02:35719120|35742554
407	mdm-miR827	Chr02:36543403|36590142
408	mdm-miR171f	Chr02:37176459|37224849
409	mdm-miR171g	Chr02:37176459|37224849
410	mdm-miR171h	Chr02:37176459|37224849
411	mdm-miR396b	Chr02:4261527|4343053
412	mdm-miR1511	Chr02:4890118|4914867
413	mdm-miR1511	Chr02:4890588|4915471
414	mdm-miR396b	Chr02:5205454|5233799
415	mdm-miR396b	Chr02:5209513|5241259
416	mdm-miR167a	Chr02:5383556|5401747
417	mdm-miR171a	Chr02:545874|548210
418	mdm-miR171b	Chr02:545874|548210
419	mdm-miR171a	Chr02:545894|548210
420	mdm-miR171b	Chr02:545894|548210
421	mdm-miR172i	Chr02:5494412|5499654
422	mdm-miR172j	Chr02:5494412|5499654
423	mdm-miR172k	Chr02:5494412|5499654
424	mdm-miR172l	Chr02:5494412|5499654
425	mdm-miR156ad	Chr02:5997994|6018120
426	mdm-miR156ae	Chr02:5997994|6018120
427	mdm-miR156ad	Chr02:5999412|6019712
428	mdm-miR156ae	Chr02:5999412|6019712
429	mdm-miR1511	Chr02:7314510|7411893
430	mdm-miR156a	Chr02:7314510|7411893
431	mdm-miR156b	Chr02:7314510|7411893
432	mdm-miR156c	Chr02:7314510|7411893
433	mdm-miR156d	Chr02:7314510|7411893
434	mdm-miR156e	Chr02:7314510|7411893
435	mdm-miR156f	Chr02:7314510|7411893
436	mdm-miR156g	Chr02:7314510|7411893
437	mdm-miR156h	Chr02:7314510|7411893
438	mdm-miR156i	Chr02:7314510|7411893
439	mdm-miR156j	Chr02:7314510|7411893
440	mdm-miR156k	Chr02:7314510|7411893
441	mdm-miR156l	Chr02:7314510|7411893
442	mdm-miR156m	Chr02:7314510|7411893
443	mdm-miR156n	Chr02:7314510|7411893
444	mdm-miR156o	Chr02:7314510|7411893
445	mdm-miR172a	Chr02:7830433|7855661
446	mdm-miR172b	Chr02:7830433|7855661
447	mdm-miR172c	Chr02:7830433|7855661
448	mdm-miR172a	Chr02:7830839|7855979
449	mdm-miR172b	Chr02:7830839|7855979
450	mdm-miR172c	Chr02:7830839|7855979
451	mdm-miR172a	Chr02:7831218|7856466
452	mdm-miR172b	Chr02:7831218|7856466
453	mdm-miR172c	Chr02:7831218|7856466
454	mdm-miR172a	Chr02:7832913|7861169
455	mdm-miR172b	Chr02:7832913|7861169
456	mdm-miR172c	Chr02:7832913|7861169
457	mdm-miR156ad	Chr02:8007496|8021718
458	mdm-miR156ae	Chr02:8007496|8021718
459	mdm-miR156ad	Chr02:8010384|8023151
460	mdm-miR156ae	Chr02:8010384|8023151
461	mdm-miR1511	Chr02:8107117|8200400
462	mdm-miR477a	Chr02:8107117|8200400
463	mdm-miR171a	Chr02:821944|824753
464	mdm-miR171b	Chr02:821944|824753
465	mdm-miR7127a	Chr02:8485527|8543472
466	mdm-miR7127b	Chr02:8485527|8543472
467	mdm-miR7127a	Chr02:8486131|8544082
468	mdm-miR7127b	Chr02:8486131|8544082
469	mdm-miR7127a	Chr02:8487794|8545746
470	mdm-miR7127b	Chr02:8487794|8545746
471	mdm-miR7127a	Chr02:8487967|8545907
472	mdm-miR7127b	Chr02:8487967|8545907
473	mdm-miR7127a	Chr02:8488248|8546281
474	mdm-miR7127b	Chr02:8488248|8546281
475	mdm-miR7127a	Chr02:8488541|8546465
476	mdm-miR7127b	Chr02:8488541|8546465
477	mdm-miR7127a	Chr02:8488976|8546934
478	mdm-miR7127b	Chr02:8488976|8546934
479	mdm-miR156a	Chr02:868488|929465
480	mdm-miR156b	Chr02:868488|929465
481	mdm-miR156c	Chr02:868488|929465
482	mdm-miR156d	Chr02:868488|929465
483	mdm-miR156e	Chr02:868488|929465
484	mdm-miR156f	Chr02:868488|929465
485	mdm-miR156g	Chr02:868488|929465
486	mdm-miR156h	Chr02:868488|929465
487	mdm-miR156i	Chr02:868488|929465
488	mdm-miR156j	Chr02:868488|929465
489	mdm-miR156k	Chr02:868488|929465
490	mdm-miR156l	Chr02:868488|929465
491	mdm-miR156m	Chr02:868488|929465
492	mdm-miR156n	Chr02:868488|929465
493	mdm-miR156o	Chr02:868488|929465
494	mdm-miR1511	Chr02:962364|989332
495	mdm-miR164b	Chr03:1030035|1094488
496	mdm-miR164c	Chr03:1030035|1094488
497	mdm-miR164d	Chr03:1030035|1094488
498	mdm-miR164e	Chr03:1030035|1094488
499	mdm-miR164f	Chr03:1030035|1094488
500	mdm-miR482d	Chr03:1030035|1094488
501	mdm-miR535b	Chr03:11306578|11309687
502	mdm-miR535c	Chr03:11306578|11309687
503	mdm-miR482a-3p	Chr03:1226433|1277176
504	mdm-miR156ab	Chr03:1227294|1228996
505	mdm-miR156ac	Chr03:1227294|1228996
506	mdm-miR482a-3p	Chr03:1231746|1277938
507	mdm-miR482a-3p	Chr03:1259549|1276955
508	mdm-miR156ad	Chr03:12690286|12773948
509	mdm-miR156ae	Chr03:12690286|12773948
510	mdm-miR167b	Chr03:12690286|12773948
511	mdm-miR167c	Chr03:12690286|12773948
512	mdm-miR167d	Chr03:12690286|12773948
513	mdm-miR167e	Chr03:12690286|12773948
514	mdm-miR167f	Chr03:12690286|12773948
515	mdm-miR167g	Chr03:12690286|12773948
516	mdm-miR535b	Chr03:12690286|12773948
517	mdm-miR535c	Chr03:12690286|12773948
518	mdm-miR535b	Chr03:12811509|12811953
519	mdm-miR535c	Chr03:12811509|12811953
520	mdm-miR156ab	Chr03:137388|137563
521	mdm-miR156ac	Chr03:137388|137563
522	mdm-miR156ad	Chr03:1377273|1443567
523	mdm-miR156ae	Chr03:1377273|1443567
524	mdm-miR156ad	Chr03:1377366|1443660
525	mdm-miR156ae	Chr03:1377366|1443660
526	mdm-miR167b	Chr03:2040879|2078717
527	mdm-miR167c	Chr03:2040879|2078717
528	mdm-miR167d	Chr03:2040879|2078717
529	mdm-miR167e	Chr03:2040879|2078717
530	mdm-miR167f	Chr03:2040879|2078717
531	mdm-miR167g	Chr03:2040879|2078717
532	mdm-miR167h	Chr03:2040879|2078717
533	mdm-miR167i	Chr03:2040879|2078717
534	mdm-miR167j	Chr03:2040879|2078717
535	mdm-miR3627a	Chr03:2089799|2131827
536	mdm-miR3627b	Chr03:2089799|2131827
537	mdm-miR3627c	Chr03:2089799|2131827
538	mdm-miR3627a	Chr03:2090788|2133103
539	mdm-miR3627b	Chr03:2090788|2133103
540	mdm-miR3627c	Chr03:2090788|2133103
541	mdm-miR3627a	Chr03:2094886|2137408
542	mdm-miR3627b	Chr03:2094886|2137408
543	mdm-miR3627c	Chr03:2094886|2137408
544	mdm-miR3627a	Chr03:2100831|2152541
545	mdm-miR3627b	Chr03:2100831|2152541
546	mdm-miR3627c	Chr03:2100831|2152541
547	mdm-miR7120a	Chr03:2100831|2152541
548	mdm-miR7120b	Chr03:2100831|2152541
549	mdm-miR396a	Chr03:22369723|22385034
550	mdm-miR396c	Chr03:22369723|22385034
551	mdm-miR396d	Chr03:22369723|22385034
552	mdm-miR396e	Chr03:22369723|22385034
553	mdm-miR398a	Chr03:22369723|22385034
554	mdm-miR398b	Chr03:22369723|22385034
555	mdm-miR398c	Chr03:22369723|22385034
556	mdm-miR396a	Chr03:22369748|22385058
557	mdm-miR396c	Chr03:22369748|22385058
558	mdm-miR396d	Chr03:22369748|22385058
559	mdm-miR396e	Chr03:22369748|22385058
560	mdm-miR398a	Chr03:22369748|22385058
561	mdm-miR398b	Chr03:22369748|22385058
562	mdm-miR398c	Chr03:22369748|22385058
563	mdm-miR535a	Chr03:24828368|24914226
564	mdm-miR535a	Chr03:24869328|24913998
565	mdm-miR535a	Chr03:24882204|24927824
566	mdm-miR156aa	Chr03:26297305|26324247
567	mdm-miR156p	Chr03:26297305|26324247
568	mdm-miR156q	Chr03:26297305|26324247
569	mdm-miR156r	Chr03:26297305|26324247
570	mdm-miR156s	Chr03:26297305|26324247
571	mdm-miR156x	Chr03:26297305|26324247
572	mdm-miR156y	Chr03:26297305|26324247
573	mdm-miR156z	Chr03:26297305|26324247
574	mdm-miR7126	Chr03:26310296|26336750
575	mdm-miR7126	Chr03:26310771|26336846
576	mdm-miR164a	Chr03:2637515|2697073
577	mdm-miR164a	Chr03:2640941|2700345
578	mdm-miR156ad	Chr03:2746961|2755122
579	mdm-miR156ae	Chr03:2746961|2755122
580	mdm-miR482b	Chr03:2746961|2755122
581	mdm-miR482c	Chr03:2746961|2755122
582	mdm-miR156ad	Chr03:2746978|2755047
583	mdm-miR156ae	Chr03:2746978|2755047
584	mdm-miR482b	Chr03:2746978|2755047
585	mdm-miR482c	Chr03:2746978|2755047
586	mdm-miR171i	Chr03:27601102|27612581
587	mdm-miR171j	Chr03:27601102|27612581
588	mdm-miR171k	Chr03:27601102|27612581
589	mdm-miR171l	Chr03:27601102|27612581
590	mdm-miR171i	Chr03:27601488|27613328
591	mdm-miR171j	Chr03:27601488|27613328
592	mdm-miR171k	Chr03:27601488|27613328
593	mdm-miR171l	Chr03:27601488|27613328
594	mdm-miR171i	Chr03:27604101|27615621
595	mdm-miR171j	Chr03:27604101|27615621
596	mdm-miR171k	Chr03:27604101|27615621
597	mdm-miR171l	Chr03:27604101|27615621
598	mdm-miR482d	Chr03:31052835|31064477
599	mdm-miR1511	Chr03:31862712|31915300
600	mdm-miR156t	Chr03:31862712|31915300
601	mdm-miR156u	Chr03:31862712|31915300
602	mdm-miR156v	Chr03:31862712|31915300
603	mdm-miR156w	Chr03:31862712|31915300
604	mdm-miR7120a	Chr03:31862712|31915300
605	mdm-miR7120b	Chr03:31862712|31915300
606	mdm-miR171a	Chr03:36074783|36122075
607	mdm-miR171b	Chr03:36074783|36122075
608	mdm-miR393a	Chr03:36074783|36122075
609	mdm-miR393b	Chr03:36074783|36122075
610	mdm-miR393c	Chr03:36074783|36122075
611	mdm-miR171a	Chr03:36078450|36126044
612	mdm-miR171b	Chr03:36078450|36126044
613	mdm-miR393a	Chr03:36078450|36126044
614	mdm-miR393b	Chr03:36078450|36126044
615	mdm-miR393c	Chr03:36078450|36126044
616	mdm-miR399e	Chr03:36078450|36126044
617	mdm-miR399f	Chr03:36078450|36126044
618	mdm-miR399g	Chr03:36078450|36126044
619	mdm-miR399h	Chr03:36078450|36126044
620	mdm-miR159a	Chr03:36305539|36311119
621	mdm-miR159b	Chr03:36305539|36311119
622	mdm-miR172a	Chr03:36596333|36622026
623	mdm-miR172b	Chr03:36596333|36622026
624	mdm-miR172c	Chr03:36596333|36622026
625	mdm-miR172d	Chr03:36596333|36622026
626	mdm-miR172e	Chr03:36596333|36622026
627	mdm-miR172f	Chr03:36596333|36622026
628	mdm-miR172g	Chr03:36596333|36622026
629	mdm-miR172h	Chr03:36596333|36622026
630	mdm-miR172i	Chr03:36596333|36622026
631	mdm-miR172j	Chr03:36596333|36622026
632	mdm-miR172k	Chr03:36596333|36622026
633	mdm-miR172a	Chr03:36604087|36623687
634	mdm-miR172b	Chr03:36604087|36623687
635	mdm-miR172c	Chr03:36604087|36623687
636	mdm-miR172d	Chr03:36604087|36623687
637	mdm-miR172e	Chr03:36604087|36623687
638	mdm-miR172f	Chr03:36604087|36623687
639	mdm-miR172g	Chr03:36604087|36623687
640	mdm-miR172h	Chr03:36604087|36623687
641	mdm-miR172i	Chr03:36604087|36623687
642	mdm-miR172j	Chr03:36604087|36623687
643	mdm-miR172k	Chr03:36604087|36623687
644	mdm-miR7126	Chr03:36800733|36808778
645	mdm-miR159a	Chr03:37007125|37021931
646	mdm-miR159b	Chr03:37007125|37021931
647	mdm-miR482d	Chr03:37063182|37063650
648	mdm-miR171m	Chr03:3854590|3949531
649	mdm-miR171n	Chr03:3854590|3949531
650	mdm-miR171m	Chr03:3945109|3956427
651	mdm-miR171n	Chr03:3945109|3956427
652	mdm-miR171m	Chr03:3945120|3956241
653	mdm-miR171n	Chr03:3945120|3956241
654	mdm-miR171m	Chr03:3945120|3956427
655	mdm-miR171n	Chr03:3945120|3956427
656	mdm-miR171m	Chr03:3945120|3957131
657	mdm-miR171n	Chr03:3945120|3957131
658	mdm-miR171m	Chr03:3945130|3956427
659	mdm-miR171n	Chr03:3945130|3956427
660	mdm-miR162a	Chr03:5085990|5103422
661	mdm-miR162b	Chr03:5085990|5103422
662	mdm-miR162a	Chr03:5086356|5103783
663	mdm-miR162b	Chr03:5086356|5103783
664	mdm-miR162a	Chr03:5086832|5103422
665	mdm-miR162b	Chr03:5086832|5103422
666	mdm-miR162a	Chr03:5087497|5104146
667	mdm-miR162b	Chr03:5087497|5104146
668	mdm-miR159a	Chr03:8046394|8069300
669	mdm-miR159b	Chr03:8046394|8069300
670	mdm-miR482a-5p	Chr03:8958586|8976746
671	mdm-miR172a	Chr03:9398432|9428603
672	mdm-miR172b	Chr03:9398432|9428603
673	mdm-miR172c	Chr03:9398432|9428603
674	mdm-miR172d	Chr03:9398432|9428603
675	mdm-miR172e	Chr03:9398432|9428603
676	mdm-miR172f	Chr03:9398432|9428603
677	mdm-miR172g	Chr03:9398432|9428603
678	mdm-miR172h	Chr03:9398432|9428603
679	mdm-miR172i	Chr03:9398432|9428603
680	mdm-miR172j	Chr03:9398432|9428603
681	mdm-miR172k	Chr03:9398432|9428603
682	mdm-miR162a	Chr04:1458386|1511433
683	mdm-miR162b	Chr04:1458386|1511433
684	mdm-miR171a	Chr04:1458386|1511433
685	mdm-miR171b	Chr04:1458386|1511433
686	mdm-miR162a	Chr04:1459521|1512534
687	mdm-miR162b	Chr04:1459521|1512534
688	mdm-miR171a	Chr04:1459521|1512534
689	mdm-miR171b	Chr04:1459521|1512534
690	mdm-miR162a	Chr04:1459580|1512313
691	mdm-miR162b	Chr04:1459580|1512313
692	mdm-miR171a	Chr04:1459580|1512313
693	mdm-miR171b	Chr04:1459580|1512313
694	mdm-miR162a	Chr04:1464397|1515359
695	mdm-miR162b	Chr04:1464397|1515359
696	mdm-miR171a	Chr04:1464397|1515359
697	mdm-miR171b	Chr04:1464397|1515359
698	mdm-miR162a	Chr04:1470614|1529754
699	mdm-miR162b	Chr04:1470614|1529754
700	mdm-miR171a	Chr04:1470614|1529754
701	mdm-miR171b	Chr04:1470614|1529754
702	mdm-miR1511	Chr04:17511857|17540994
703	mdm-miR319a	Chr04:21368711|21428227
704	mdm-miR319b	Chr04:21368711|21428227
705	mdm-miR477a	Chr04:24365451|24384110
706	mdm-miR477a	Chr04:24365909|24384618
707	mdm-miR156ad	Chr04:2788155|2878235
708	mdm-miR156ae	Chr04:2788155|2878235
709	mdm-miR159c	Chr04:2788155|2878235
710	mdm-miR399a	Chr04:29123474|29157507
711	mdm-miR399b	Chr04:29123474|29157507
712	mdm-miR399c	Chr04:29123474|29157507
713	mdm-miR156ad	Chr04:3096852|3140035
714	mdm-miR156ae	Chr04:3096852|3140035
715	mdm-miR395a	Chr04:3096852|3140035
716	mdm-miR395b	Chr04:3096852|3140035
717	mdm-miR395c	Chr04:3096852|3140035
718	mdm-miR395d	Chr04:3096852|3140035
719	mdm-miR395e	Chr04:3096852|3140035
720	mdm-miR395f	Chr04:3096852|3140035
721	mdm-miR395g	Chr04:3096852|3140035
722	mdm-miR395h	Chr04:3096852|3140035
723	mdm-miR395i	Chr04:3096852|3140035
724	mdm-miR156ad	Chr04:3097074|3140948
725	mdm-miR156ae	Chr04:3097074|3140948
726	mdm-miR395a	Chr04:3097074|3140948
727	mdm-miR395b	Chr04:3097074|3140948
728	mdm-miR395c	Chr04:3097074|3140948
729	mdm-miR395d	Chr04:3097074|3140948
730	mdm-miR395e	Chr04:3097074|3140948
731	mdm-miR395f	Chr04:3097074|3140948
732	mdm-miR395g	Chr04:3097074|3140948
733	mdm-miR395h	Chr04:3097074|3140948
734	mdm-miR395i	Chr04:3097074|3140948
735	mdm-miR156ad	Chr04:3097165|3140929
736	mdm-miR156ae	Chr04:3097165|3140929
737	mdm-miR395a	Chr04:3097165|3140929
738	mdm-miR395b	Chr04:3097165|3140929
739	mdm-miR395c	Chr04:3097165|3140929
740	mdm-miR395d	Chr04:3097165|3140929
741	mdm-miR395e	Chr04:3097165|3140929
742	mdm-miR395f	Chr04:3097165|3140929
743	mdm-miR395g	Chr04:3097165|3140929
744	mdm-miR395h	Chr04:3097165|3140929
745	mdm-miR395i	Chr04:3097165|3140929
746	mdm-miR395a	Chr04:3103131|3145653
747	mdm-miR395b	Chr04:3103131|3145653
748	mdm-miR395c	Chr04:3103131|3145653
749	mdm-miR395d	Chr04:3103131|3145653
750	mdm-miR395e	Chr04:3103131|3145653
751	mdm-miR395f	Chr04:3103131|3145653
752	mdm-miR395g	Chr04:3103131|3145653
753	mdm-miR395h	Chr04:3103131|3145653
754	mdm-miR395i	Chr04:3103131|3145653
755	mdm-miR395a	Chr04:3104507|3147085
756	mdm-miR395b	Chr04:3104507|3147085
757	mdm-miR395c	Chr04:3104507|3147085
758	mdm-miR395d	Chr04:3104507|3147085
759	mdm-miR395e	Chr04:3104507|3147085
760	mdm-miR395f	Chr04:3104507|3147085
761	mdm-miR395g	Chr04:3104507|3147085
762	mdm-miR395h	Chr04:3104507|3147085
763	mdm-miR395i	Chr04:3104507|3147085
764	mdm-miR395a	Chr04:3114413|3148842
765	mdm-miR395b	Chr04:3114413|3148842
766	mdm-miR395c	Chr04:3114413|3148842
767	mdm-miR395d	Chr04:3114413|3148842
768	mdm-miR395e	Chr04:3114413|3148842
769	mdm-miR395f	Chr04:3114413|3148842
770	mdm-miR395g	Chr04:3114413|3148842
771	mdm-miR395h	Chr04:3114413|3148842
772	mdm-miR395i	Chr04:3114413|3148842
773	mdm-miR395a	Chr04:3115224|3149634
774	mdm-miR395b	Chr04:3115224|3149634
775	mdm-miR395c	Chr04:3115224|3149634
776	mdm-miR395d	Chr04:3115224|3149634
777	mdm-miR395e	Chr04:3115224|3149634
778	mdm-miR395f	Chr04:3115224|3149634
779	mdm-miR395g	Chr04:3115224|3149634
780	mdm-miR395h	Chr04:3115224|3149634
781	mdm-miR395i	Chr04:3115224|3149634
782	mdm-miR1511	Chr04:31323434|31382228
783	mdm-miR156ad	Chr04:31323434|31382228
784	mdm-miR156ae	Chr04:31323434|31382228
785	mdm-miR482a-3p	Chr04:31323434|31382228
786	mdm-miR156ad	Chr04:3879582|3961011
787	mdm-miR156ae	Chr04:3879582|3961011
788	mdm-miR167b	Chr04:3879582|3961011
789	mdm-miR167c	Chr04:3879582|3961011
790	mdm-miR167d	Chr04:3879582|3961011
791	mdm-miR167e	Chr04:3879582|3961011
792	mdm-miR167f	Chr04:3879582|3961011
793	mdm-miR167g	Chr04:3879582|3961011
794	mdm-miR167b	Chr04:3912160|3971202
795	mdm-miR167c	Chr04:3912160|3971202
796	mdm-miR167d	Chr04:3912160|3971202
797	mdm-miR167e	Chr04:3912160|3971202
798	mdm-miR167f	Chr04:3912160|3971202
799	mdm-miR167g	Chr04:3912160|3971202
800	mdm-miR7126	Chr04:439392|501213
801	mdm-miR827	Chr04:439392|501213
802	mdm-miR171a	Chr04:6232452|6246599
803	mdm-miR171b	Chr04:6232452|6246599
804	mdm-miR171c	Chr04:6232452|6246599
805	mdm-miR171d	Chr04:6232452|6246599
806	mdm-miR171e	Chr04:6232452|6246599
807	mdm-miR477a	Chr05:15867677|15869644
808	mdm-miR156ab	Chr05:21336904|21380732
809	mdm-miR156ac	Chr05:21336904|21380732
810	mdm-miR7127a	Chr05:21336904|21380732
811	mdm-miR7127b	Chr05:21336904|21380732
812	mdm-miR1511	Chr05:21821885|21853409
813	mdm-miR3627a	Chr05:21821885|21853409
814	mdm-miR3627b	Chr05:21821885|21853409
815	mdm-miR3627c	Chr05:21821885|21853409
816	mdm-miR156p	Chr05:22123263|22128805
817	mdm-miR156q	Chr05:22123263|22128805
818	mdm-miR156r	Chr05:22123263|22128805
819	mdm-miR156s	Chr05:22123263|22128805
820	mdm-miR156aa	Chr05:22911294|22972237
821	mdm-miR156ab	Chr05:22911294|22972237
822	mdm-miR156ac	Chr05:22911294|22972237
823	mdm-miR156p	Chr05:22911294|22972237
824	mdm-miR156q	Chr05:22911294|22972237
825	mdm-miR156r	Chr05:22911294|22972237
826	mdm-miR156s	Chr05:22911294|22972237
827	mdm-miR156x	Chr05:22911294|22972237
828	mdm-miR156y	Chr05:22911294|22972237
829	mdm-miR156z	Chr05:22911294|22972237
830	mdm-miR171a	Chr05:22911294|22972237
831	mdm-miR171b	Chr05:22911294|22972237
832	mdm-miR172a	Chr05:22911294|22972237
833	mdm-miR172b	Chr05:22911294|22972237
834	mdm-miR172c	Chr05:22911294|22972237
835	mdm-miR172m	Chr05:22911294|22972237
836	mdm-miR172n	Chr05:22911294|22972237
837	mdm-miR172o	Chr05:22911294|22972237
838	mdm-miR156ad	Chr05:24825573|24885274
839	mdm-miR156ae	Chr05:24825573|24885274
840	mdm-miR156aa	Chr05:27303256|27394950
841	mdm-miR156ad	Chr05:27303256|27394950
842	mdm-miR156ae	Chr05:27303256|27394950
843	mdm-miR156p	Chr05:27303256|27394950
844	mdm-miR156q	Chr05:27303256|27394950
845	mdm-miR156r	Chr05:27303256|27394950
846	mdm-miR156s	Chr05:27303256|27394950
847	mdm-miR156t	Chr05:27303256|27394950
848	mdm-miR156u	Chr05:27303256|27394950
849	mdm-miR156v	Chr05:27303256|27394950
850	mdm-miR156w	Chr05:27303256|27394950
851	mdm-miR156x	Chr05:27303256|27394950
852	mdm-miR156y	Chr05:27303256|27394950
853	mdm-miR156z	Chr05:27303256|27394950
854	mdm-miR535a	Chr05:28453543|28466519
855	mdm-miR535b	Chr05:28453543|28466519
856	mdm-miR535c	Chr05:28453543|28466519
857	mdm-miR535d	Chr05:28453543|28466519
858	mdm-miR2111a	Chr05:29494506|29495627
859	mdm-miR2111b	Chr05:29494506|29495627
860	mdm-miR399d	Chr05:32485470|32510183
861	mdm-miR535a	Chr05:34439558|34472366
862	mdm-miR535d	Chr05:34439558|34472366
863	mdm-miR1511	Chr05:34731940|34812265
864	mdm-miR156aa	Chr05:34731940|34812265
865	mdm-miR156x	Chr05:34731940|34812265
866	mdm-miR156y	Chr05:34731940|34812265
867	mdm-miR156z	Chr05:34731940|34812265
868	mdm-miR391	Chr05:3583373|3588106
869	mdm-miR391	Chr05:3587709|3588106
870	mdm-miR7120a	Chr05:36214535|36268376
871	mdm-miR7120b	Chr05:36214535|36268376
872	mdm-miR7120a	Chr05:36221549|36275677
873	mdm-miR7120b	Chr05:36221549|36275677
874	mdm-miR7120a	Chr05:36223205|36277248
875	mdm-miR7120b	Chr05:36223205|36277248
876	mdm-miR172a	Chr05:36460137|36473167
877	mdm-miR172b	Chr05:36460137|36473167
878	mdm-miR172c	Chr05:36460137|36473167
879	mdm-miR172d	Chr05:36460137|36473167
880	mdm-miR172e	Chr05:36460137|36473167
881	mdm-miR172f	Chr05:36460137|36473167
882	mdm-miR172g	Chr05:36460137|36473167
883	mdm-miR172h	Chr05:36460137|36473167
884	mdm-miR172i	Chr05:36460137|36473167
885	mdm-miR172j	Chr05:36460137|36473167
886	mdm-miR172k	Chr05:36460137|36473167
887	mdm-miR172l	Chr05:36460137|36473167
888	mdm-miR172m	Chr05:36460137|36473167
889	mdm-miR172n	Chr05:36460137|36473167
890	mdm-miR172o	Chr05:36460137|36473167
891	mdm-miR172a	Chr05:36516344|36572931
892	mdm-miR172b	Chr05:36516344|36572931
893	mdm-miR172c	Chr05:36516344|36572931
894	mdm-miR172d	Chr05:36516344|36572931
895	mdm-miR172e	Chr05:36516344|36572931
896	mdm-miR172f	Chr05:36516344|36572931
897	mdm-miR172g	Chr05:36516344|36572931
898	mdm-miR172h	Chr05:36516344|36572931
899	mdm-miR172l	Chr05:36516344|36572931
900	mdm-miR172m	Chr05:36516344|36572931
901	mdm-miR172n	Chr05:36516344|36572931
902	mdm-miR172o	Chr05:36516344|36572931
903	mdm-miR172a	Chr05:36519797|36577616
904	mdm-miR172b	Chr05:36519797|36577616
905	mdm-miR172c	Chr05:36519797|36577616
906	mdm-miR172d	Chr05:36519797|36577616
907	mdm-miR172e	Chr05:36519797|36577616
908	mdm-miR172f	Chr05:36519797|36577616
909	mdm-miR172g	Chr05:36519797|36577616
910	mdm-miR172h	Chr05:36519797|36577616
911	mdm-miR172l	Chr05:36519797|36577616
912	mdm-miR172m	Chr05:36519797|36577616
913	mdm-miR172n	Chr05:36519797|36577616
914	mdm-miR172o	Chr05:36519797|36577616
915	mdm-miR167b	Chr05:36800516|36848995
916	mdm-miR167c	Chr05:36800516|36848995
917	mdm-miR167d	Chr05:36800516|36848995
918	mdm-miR167e	Chr05:36800516|36848995
919	mdm-miR167f	Chr05:36800516|36848995
920	mdm-miR167g	Chr05:36800516|36848995
921	mdm-miR167b	Chr05:36802433|36850954
922	mdm-miR167c	Chr05:36802433|36850954
923	mdm-miR167d	Chr05:36802433|36850954
924	mdm-miR167e	Chr05:36802433|36850954
925	mdm-miR167f	Chr05:36802433|36850954
926	mdm-miR167g	Chr05:36802433|36850954
927	mdm-miR1511	Chr05:39947589|39967655
928	mdm-miR169e	Chr05:43378066|43447108
929	mdm-miR169f	Chr05:43378066|43447108
930	mdm-miR408b	Chr05:43378066|43447108
931	mdm-miR408c	Chr05:43378066|43447108
932	mdm-miR408d	Chr05:43378066|43447108
933	mdm-miR395a	Chr05:44092468|44095265
934	mdm-miR395b	Chr05:44092468|44095265
935	mdm-miR395c	Chr05:44092468|44095265
936	mdm-miR395d	Chr05:44092468|44095265
937	mdm-miR395e	Chr05:44092468|44095265
938	mdm-miR395f	Chr05:44092468|44095265
939	mdm-miR395g	Chr05:44092468|44095265
940	mdm-miR395h	Chr05:44092468|44095265
941	mdm-miR395i	Chr05:44092468|44095265
942	mdm-miR319a	Chr05:44489629|44519006
943	mdm-miR319b	Chr05:44489629|44519006
944	mdm-miR7120a	Chr05:44489629|44519006
945	mdm-miR7120b	Chr05:44489629|44519006
946	mdm-miR319a	Chr05:44490586|44520085
947	mdm-miR319b	Chr05:44490586|44520085
948	mdm-miR7120a	Chr05:44490586|44520085
949	mdm-miR7120b	Chr05:44490586|44520085
950	mdm-miR319a	Chr05:44494455|44587724
951	mdm-miR319b	Chr05:44494455|44587724
952	mdm-miR7120a	Chr05:44494455|44587724
953	mdm-miR7120b	Chr05:44494455|44587724
954	mdm-miR171a	Chr05:45610487|45626542
955	mdm-miR171b	Chr05:45610487|45626542
956	mdm-miR167b	Chr05:45610618|45679387
957	mdm-miR167c	Chr05:45610618|45679387
958	mdm-miR167d	Chr05:45610618|45679387
959	mdm-miR167e	Chr05:45610618|45679387
960	mdm-miR167f	Chr05:45610618|45679387
961	mdm-miR167g	Chr05:45610618|45679387
962	mdm-miR171a	Chr05:45610618|45679387
963	mdm-miR171b	Chr05:45610618|45679387
964	mdm-miR172a	Chr05:45610618|45679387
965	mdm-miR172b	Chr05:45610618|45679387
966	mdm-miR172c	Chr05:45610618|45679387
967	mdm-miR172l	Chr05:45610618|45679387
968	mdm-miR172m	Chr05:45610618|45679387
969	mdm-miR172n	Chr05:45610618|45679387
970	mdm-miR172o	Chr05:45610618|45679387
971	mdm-miR171a	Chr05:45612194|45632173
972	mdm-miR171b	Chr05:45612194|45632173
973	mdm-miR3627a	Chr05:45800352|45810556
974	mdm-miR3627b	Chr05:45800352|45810556
975	mdm-miR3627c	Chr05:45800352|45810556
976	mdm-miR171j	Chr05:46079299|46090952
977	mdm-miR171k	Chr05:46079299|46090952
978	mdm-miR171l	Chr05:46079299|46090952
979	mdm-miR1511	Chr05:46081863|46100074
980	mdm-miR395a	Chr05:46571603|46605695
981	mdm-miR395b	Chr05:46571603|46605695
982	mdm-miR395c	Chr05:46571603|46605695
983	mdm-miR395d	Chr05:46571603|46605695
984	mdm-miR395e	Chr05:46571603|46605695
985	mdm-miR395f	Chr05:46571603|46605695
986	mdm-miR395g	Chr05:46571603|46605695
987	mdm-miR395h	Chr05:46571603|46605695
988	mdm-miR395i	Chr05:46571603|46605695
989	mdm-miR166a	Chr05:46610747|46630480
990	mdm-miR166b	Chr05:46610747|46630480
991	mdm-miR166c	Chr05:46610747|46630480
992	mdm-miR166d	Chr05:46610747|46630480
993	mdm-miR166e	Chr05:46610747|46630480
994	mdm-miR166f	Chr05:46610747|46630480
995	mdm-miR166g	Chr05:46610747|46630480
996	mdm-miR166h	Chr05:46610747|46630480
997	mdm-miR166i	Chr05:46610747|46630480
998	mdm-miR395a	Chr05:46610747|46630480
999	mdm-miR395b	Chr05:46610747|46630480
1000	mdm-miR395c	Chr05:46610747|46630480
1001	mdm-miR395d	Chr05:46610747|46630480
1002	mdm-miR395e	Chr05:46610747|46630480
1003	mdm-miR395f	Chr05:46610747|46630480
1004	mdm-miR395g	Chr05:46610747|46630480
1005	mdm-miR395h	Chr05:46610747|46630480
1006	mdm-miR395i	Chr05:46610747|46630480
1007	mdm-miR535a	Chr05:46610747|46630480
1008	mdm-miR535d	Chr05:46610747|46630480
1009	mdm-miR156ad	Chr05:7388515|7484072
1010	mdm-miR156ae	Chr05:7388515|7484072
1011	mdm-miR164b	Chr05:7388515|7484072
1012	mdm-miR164c	Chr05:7388515|7484072
1013	mdm-miR164d	Chr05:7388515|7484072
1014	mdm-miR164e	Chr05:7388515|7484072
1015	mdm-miR164f	Chr05:7388515|7484072
1016	mdm-miR172a	Chr05:7388515|7484072
1017	mdm-miR172b	Chr05:7388515|7484072
1018	mdm-miR172c	Chr05:7388515|7484072
1019	mdm-miR172m	Chr05:7388515|7484072
1020	mdm-miR172n	Chr05:7388515|7484072
1021	mdm-miR172o	Chr05:7388515|7484072
1022	mdm-miR399d	Chr05:7388515|7484072
1023	mdm-miR399i	Chr05:7388515|7484072
1024	mdm-miR399j	Chr05:7388515|7484072
1025	mdm-miR7127a	Chr05:7388515|7484072
1026	mdm-miR7127b	Chr05:7388515|7484072
1027	mdm-miR396c	Chr06:1184143|1210797
1028	mdm-miR396d	Chr06:1184143|1210797
1029	mdm-miR396e	Chr06:1184143|1210797
1030	mdm-miR396c	Chr06:1184729|1211394
1031	mdm-miR396d	Chr06:1184729|1211394
1032	mdm-miR396e	Chr06:1184729|1211394
1033	mdm-miR156ad	Chr06:19223916|19262585
1034	mdm-miR156ae	Chr06:19223916|19262585
1035	mdm-miR1511	Chr06:20911956|21005923
1036	mdm-miR156ad	Chr06:20911956|21005923
1037	mdm-miR156ae	Chr06:20911956|21005923
1038	mdm-miR397a	Chr06:20911956|21005923
1039	mdm-miR397b	Chr06:20911956|21005923
1040	mdm-miR164a	Chr06:24689497|24734731
1041	mdm-miR7126	Chr06:24689497|24734731
1042	mdm-miR164a	Chr06:24689663|24734087
1043	mdm-miR7126	Chr06:24689663|24734087
1044	mdm-miR164a	Chr06:24690651|24735063
1045	mdm-miR7126	Chr06:24690651|24735063
1046	mdm-miR156ad	Chr06:25459411|25535842
1047	mdm-miR156ae	Chr06:25459411|25535842
1048	mdm-miR477a	Chr06:25459411|25535842
1049	mdm-miR169e	Chr06:2915841|2953152
1050	mdm-miR169f	Chr06:2915841|2953152
1051	mdm-miR171i	Chr06:29221152|29277059
1052	mdm-miR171j	Chr06:29221152|29277059
1053	mdm-miR171k	Chr06:29221152|29277059
1054	mdm-miR171l	Chr06:29221152|29277059
1055	mdm-miR535b	Chr06:29221152|29277059
1056	mdm-miR535c	Chr06:29221152|29277059
1057	mdm-miR164a	Chr06:30040400|30055168
1058	mdm-miR535b	Chr06:30040400|30055168
1059	mdm-miR535c	Chr06:30040400|30055168
1060	mdm-miR535b	Chr06:30045027|30058857
1061	mdm-miR535c	Chr06:30045027|30058857
1062	mdm-miR7124a	Chr06:30076872|30077937
1063	mdm-miR7124b	Chr06:30076872|30077937
1064	mdm-miR535a	Chr06:30831369|30927553
1065	mdm-miR535b	Chr06:30831369|30927553
1066	mdm-miR535c	Chr06:30831369|30927553
1067	mdm-miR7120a	Chr06:30831369|30927553
1068	mdm-miR7120b	Chr06:30831369|30927553
1069	mdm-miR535a	Chr06:30849906|30875465
1070	mdm-miR535b	Chr06:30849906|30875465
1071	mdm-miR535c	Chr06:30849906|30875465
1072	mdm-miR7120a	Chr06:30849906|30875465
1073	mdm-miR7120b	Chr06:30849906|30875465
1074	mdm-miR172i	Chr06:31528204|31617589
1075	mdm-miR172j	Chr06:31528204|31617589
1076	mdm-miR172k	Chr06:31528204|31617589
1077	mdm-miR172l	Chr06:31528204|31617589
1078	mdm-miR172m	Chr06:31528204|31617589
1079	mdm-miR172n	Chr06:31528204|31617589
1080	mdm-miR172o	Chr06:31528204|31617589
1081	mdm-miR482a-5p	Chr06:31903861|31941695
1082	mdm-miR482a-5p	Chr06:31923997|31940969
1083	mdm-miR482a-5p	Chr06:31937421|31940969
1084	mdm-miR171o	Chr06:3683302|3742011
1085	mdm-miR7122a	Chr06:3683302|3742011
1086	mdm-miR7122b	Chr06:3683302|3742011
1087	mdm-miR7124a	Chr06:3683302|3742011
1088	mdm-miR7124b	Chr06:3683302|3742011
1089	mdm-miR1511	Chr06:379009|408463
1090	mdm-miR1511	Chr06:380844|410393
1091	mdm-miR1511	Chr06:390642|432822
1092	mdm-miR159a	Chr06:3961003|3966256
1093	mdm-miR159b	Chr06:3961003|3966256
1094	mdm-miR156ad	Chr07:11399202|11476229
1095	mdm-miR156ae	Chr07:11399202|11476229
1096	mdm-miR399i	Chr07:11399202|11476229
1097	mdm-miR399j	Chr07:11399202|11476229
1098	mdm-miR535b	Chr07:11399202|11476229
1099	mdm-miR535c	Chr07:11399202|11476229
1100	mdm-miR156a	Chr07:11672451|11768750
1101	mdm-miR156aa	Chr07:11672451|11768750
1102	mdm-miR156ab	Chr07:11672451|11768750
1103	mdm-miR156ac	Chr07:11672451|11768750
1104	mdm-miR156ad	Chr07:11672451|11768750
1105	mdm-miR156ae	Chr07:11672451|11768750
1106	mdm-miR156b	Chr07:11672451|11768750
1107	mdm-miR156c	Chr07:11672451|11768750
1108	mdm-miR156d	Chr07:11672451|11768750
1109	mdm-miR156e	Chr07:11672451|11768750
1110	mdm-miR156f	Chr07:11672451|11768750
1111	mdm-miR156g	Chr07:11672451|11768750
1112	mdm-miR156h	Chr07:11672451|11768750
1113	mdm-miR156i	Chr07:11672451|11768750
1114	mdm-miR156j	Chr07:11672451|11768750
1115	mdm-miR156k	Chr07:11672451|11768750
1116	mdm-miR156l	Chr07:11672451|11768750
1117	mdm-miR156m	Chr07:11672451|11768750
1118	mdm-miR156n	Chr07:11672451|11768750
1119	mdm-miR156o	Chr07:11672451|11768750
1120	mdm-miR156t	Chr07:11672451|11768750
1121	mdm-miR156u	Chr07:11672451|11768750
1122	mdm-miR156v	Chr07:11672451|11768750
1123	mdm-miR156w	Chr07:11672451|11768750
1124	mdm-miR156x	Chr07:11672451|11768750
1125	mdm-miR156y	Chr07:11672451|11768750
1126	mdm-miR156z	Chr07:11672451|11768750
1127	mdm-miR396b	Chr07:11884797|11946915
1128	mdm-miR396c	Chr07:11884797|11946915
1129	mdm-miR396d	Chr07:11884797|11946915
1130	mdm-miR396e	Chr07:11884797|11946915
1131	mdm-miR172i	Chr07:12121992|12212301
1132	mdm-miR172j	Chr07:12121992|12212301
1133	mdm-miR172k	Chr07:12121992|12212301
1134	mdm-miR477b	Chr07:12121992|12212301
1135	mdm-miR172i	Chr07:12123733|12149615
1136	mdm-miR172j	Chr07:12123733|12149615
1137	mdm-miR172k	Chr07:12123733|12149615
1138	mdm-miR477b	Chr07:12123733|12149615
1139	mdm-miR7123a	Chr07:14961656|15025748
1140	mdm-miR7123b	Chr07:14961656|15025748
1141	mdm-miR1511	Chr07:1752264|1819061
1142	mdm-miR156a	Chr07:1752264|1819061
1143	mdm-miR156b	Chr07:1752264|1819061
1144	mdm-miR156c	Chr07:1752264|1819061
1145	mdm-miR156d	Chr07:1752264|1819061
1146	mdm-miR156e	Chr07:1752264|1819061
1147	mdm-miR156f	Chr07:1752264|1819061
1148	mdm-miR156g	Chr07:1752264|1819061
1149	mdm-miR156h	Chr07:1752264|1819061
1150	mdm-miR156i	Chr07:1752264|1819061
1151	mdm-miR156j	Chr07:1752264|1819061
1152	mdm-miR156k	Chr07:1752264|1819061
1153	mdm-miR156l	Chr07:1752264|1819061
1154	mdm-miR156m	Chr07:1752264|1819061
1155	mdm-miR156n	Chr07:1752264|1819061
1156	mdm-miR156o	Chr07:1752264|1819061
1157	mdm-miR172a	Chr07:1752264|1819061
1158	mdm-miR172b	Chr07:1752264|1819061
1159	mdm-miR172c	Chr07:1752264|1819061
1160	mdm-miR172d	Chr07:1752264|1819061
1161	mdm-miR172e	Chr07:1752264|1819061
1162	mdm-miR172f	Chr07:1752264|1819061
1163	mdm-miR172g	Chr07:1752264|1819061
1164	mdm-miR172h	Chr07:1752264|1819061
1165	mdm-miR172l	Chr07:1752264|1819061
1166	mdm-miR172m	Chr07:1752264|1819061
1167	mdm-miR172n	Chr07:1752264|1819061
1168	mdm-miR172o	Chr07:1752264|1819061
1169	mdm-miR395a	Chr07:1752264|1819061
1170	mdm-miR395b	Chr07:1752264|1819061
1171	mdm-miR395c	Chr07:1752264|1819061
1172	mdm-miR395d	Chr07:1752264|1819061
1173	mdm-miR395e	Chr07:1752264|1819061
1174	mdm-miR395f	Chr07:1752264|1819061
1175	mdm-miR395g	Chr07:1752264|1819061
1176	mdm-miR395h	Chr07:1752264|1819061
1177	mdm-miR395i	Chr07:1752264|1819061
1178	mdm-miR7126	Chr07:1752264|1819061
1179	mdm-miR1511	Chr07:1752542|1770180
1180	mdm-miR172a	Chr07:1752542|1770180
1181	mdm-miR172b	Chr07:1752542|1770180
1182	mdm-miR172c	Chr07:1752542|1770180
1183	mdm-miR172d	Chr07:1752542|1770180
1184	mdm-miR172e	Chr07:1752542|1770180
1185	mdm-miR172f	Chr07:1752542|1770180
1186	mdm-miR172g	Chr07:1752542|1770180
1187	mdm-miR172h	Chr07:1752542|1770180
1188	mdm-miR172l	Chr07:1752542|1770180
1189	mdm-miR172m	Chr07:1752542|1770180
1190	mdm-miR172n	Chr07:1752542|1770180
1191	mdm-miR172o	Chr07:1752542|1770180
1192	mdm-miR1511	Chr07:1752869|1819617
1193	mdm-miR156a	Chr07:1752869|1819617
1194	mdm-miR156b	Chr07:1752869|1819617
1195	mdm-miR156c	Chr07:1752869|1819617
1196	mdm-miR156d	Chr07:1752869|1819617
1197	mdm-miR156e	Chr07:1752869|1819617
1198	mdm-miR156f	Chr07:1752869|1819617
1199	mdm-miR156g	Chr07:1752869|1819617
1200	mdm-miR156h	Chr07:1752869|1819617
1201	mdm-miR156i	Chr07:1752869|1819617
1202	mdm-miR156j	Chr07:1752869|1819617
1203	mdm-miR156k	Chr07:1752869|1819617
1204	mdm-miR156l	Chr07:1752869|1819617
1205	mdm-miR156m	Chr07:1752869|1819617
1206	mdm-miR156n	Chr07:1752869|1819617
1207	mdm-miR156o	Chr07:1752869|1819617
1208	mdm-miR172a	Chr07:1752869|1819617
1209	mdm-miR172b	Chr07:1752869|1819617
1210	mdm-miR172c	Chr07:1752869|1819617
1211	mdm-miR172d	Chr07:1752869|1819617
1212	mdm-miR172e	Chr07:1752869|1819617
1213	mdm-miR172f	Chr07:1752869|1819617
1214	mdm-miR172g	Chr07:1752869|1819617
1215	mdm-miR172h	Chr07:1752869|1819617
1216	mdm-miR172l	Chr07:1752869|1819617
1217	mdm-miR172m	Chr07:1752869|1819617
1218	mdm-miR172n	Chr07:1752869|1819617
1219	mdm-miR172o	Chr07:1752869|1819617
1220	mdm-miR395a	Chr07:1752869|1819617
1221	mdm-miR395b	Chr07:1752869|1819617
1222	mdm-miR395c	Chr07:1752869|1819617
1223	mdm-miR395d	Chr07:1752869|1819617
1224	mdm-miR395e	Chr07:1752869|1819617
1225	mdm-miR395f	Chr07:1752869|1819617
1226	mdm-miR395g	Chr07:1752869|1819617
1227	mdm-miR395h	Chr07:1752869|1819617
1228	mdm-miR395i	Chr07:1752869|1819617
1229	mdm-miR7126	Chr07:1752869|1819617
1230	mdm-miR7126	Chr07:21771435|21781927
1231	mdm-miR162a	Chr07:2443336|2481759
1232	mdm-miR162b	Chr07:2443336|2481759
1233	mdm-miR162a	Chr07:2587169|2630814
1234	mdm-miR162b	Chr07:2587169|2630814
1235	mdm-miR171o	Chr07:27662154|27699160
1236	mdm-miR399i	Chr07:27662154|27699160
1237	mdm-miR399j	Chr07:27662154|27699160
1238	mdm-miR399i	Chr07:27689474|27699160
1239	mdm-miR399j	Chr07:27689474|27699160
1240	mdm-miR159c	Chr07:2900024|2998060
1241	mdm-miR408b	Chr07:2900024|2998060
1242	mdm-miR408c	Chr07:2900024|2998060
1243	mdm-miR408d	Chr07:2900024|2998060
1244	mdm-miR535b	Chr07:31240513|31292113
1245	mdm-miR535c	Chr07:31240513|31292113
1246	mdm-miR7127a	Chr07:31240513|31292113
1247	mdm-miR7127b	Chr07:31240513|31292113
1248	mdm-miR535b	Chr07:31240513|31292222
1249	mdm-miR535c	Chr07:31240513|31292222
1250	mdm-miR7127a	Chr07:31240513|31292222
1251	mdm-miR7127b	Chr07:31240513|31292222
1252	mdm-miR7122a	Chr07:31292221|31383524
1253	mdm-miR7122b	Chr07:31292221|31383524
1254	mdm-miR7122a	Chr07:31302233|31380043
1255	mdm-miR7122b	Chr07:31302233|31380043
1256	mdm-miR172a	Chr07:31926621|31937403
1257	mdm-miR172b	Chr07:31926621|31937403
1258	mdm-miR172c	Chr07:31926621|31937403
1259	mdm-miR172d	Chr07:31926621|31937403
1260	mdm-miR172e	Chr07:31926621|31937403
1261	mdm-miR172f	Chr07:31926621|31937403
1262	mdm-miR172g	Chr07:31926621|31937403
1263	mdm-miR172h	Chr07:31926621|31937403
1264	mdm-miR172i	Chr07:31926621|31937403
1265	mdm-miR172j	Chr07:31926621|31937403
1266	mdm-miR172k	Chr07:31926621|31937403
1267	mdm-miR172l	Chr07:31926621|31937403
1268	mdm-miR172m	Chr07:31926621|31937403
1269	mdm-miR172n	Chr07:31926621|31937403
1270	mdm-miR172o	Chr07:31926621|31937403
1271	mdm-miR172a	Chr07:31926742|31937129
1272	mdm-miR172b	Chr07:31926742|31937129
1273	mdm-miR172c	Chr07:31926742|31937129
1274	mdm-miR172d	Chr07:31926742|31937129
1275	mdm-miR172e	Chr07:31926742|31937129
1276	mdm-miR172f	Chr07:31926742|31937129
1277	mdm-miR172g	Chr07:31926742|31937129
1278	mdm-miR172h	Chr07:31926742|31937129
1279	mdm-miR172i	Chr07:31926742|31937129
1280	mdm-miR172j	Chr07:31926742|31937129
1281	mdm-miR172k	Chr07:31926742|31937129
1282	mdm-miR172l	Chr07:31926742|31937129
1283	mdm-miR172m	Chr07:31926742|31937129
1284	mdm-miR172n	Chr07:31926742|31937129
1285	mdm-miR172o	Chr07:31926742|31937129
1286	mdm-miR172a	Chr07:31927857|31938249
1287	mdm-miR172b	Chr07:31927857|31938249
1288	mdm-miR172c	Chr07:31927857|31938249
1289	mdm-miR172d	Chr07:31927857|31938249
1290	mdm-miR172e	Chr07:31927857|31938249
1291	mdm-miR172f	Chr07:31927857|31938249
1292	mdm-miR172g	Chr07:31927857|31938249
1293	mdm-miR172h	Chr07:31927857|31938249
1294	mdm-miR172i	Chr07:31927857|31938249
1295	mdm-miR172j	Chr07:31927857|31938249
1296	mdm-miR172k	Chr07:31927857|31938249
1297	mdm-miR172l	Chr07:31927857|31938249
1298	mdm-miR172m	Chr07:31927857|31938249
1299	mdm-miR172n	Chr07:31927857|31938249
1300	mdm-miR172o	Chr07:31927857|31938249
1301	mdm-miR7124a	Chr07:3247615|3306470
1302	mdm-miR7124b	Chr07:3247615|3306470
1303	mdm-miR391	Chr07:32605532|32623002
1304	mdm-miR482d	Chr07:32614353|32651635
1305	mdm-miR535d	Chr07:32614353|32651635
1306	mdm-miR482d	Chr07:32615614|32683767
1307	mdm-miR535d	Chr07:32615614|32683767
1308	mdm-miR482d	Chr07:32617024|32685656
1309	mdm-miR535d	Chr07:32617024|32685656
1310	mdm-miR1511	Chr07:34935796|35021108
1311	mdm-miR159c	Chr07:34935796|35021108
1312	mdm-miR397a	Chr07:34935796|35021108
1313	mdm-miR397b	Chr07:34935796|35021108
1314	mdm-miR1511	Chr07:35941854|35963627
1315	mdm-miR171a	Chr07:35941854|35963627
1316	mdm-miR171b	Chr07:35941854|35963627
1317	mdm-miR399a	Chr07:4824512|4852092
1318	mdm-miR399b	Chr07:4824512|4852092
1319	mdm-miR399c	Chr07:4824512|4852092
1320	mdm-miR156a	Chr07:5192240|5276163
1321	mdm-miR156b	Chr07:5192240|5276163
1322	mdm-miR156c	Chr07:5192240|5276163
1323	mdm-miR156d	Chr07:5192240|5276163
1324	mdm-miR156e	Chr07:5192240|5276163
1325	mdm-miR156f	Chr07:5192240|5276163
1326	mdm-miR156g	Chr07:5192240|5276163
1327	mdm-miR156h	Chr07:5192240|5276163
1328	mdm-miR156i	Chr07:5192240|5276163
1329	mdm-miR156j	Chr07:5192240|5276163
1330	mdm-miR156k	Chr07:5192240|5276163
1331	mdm-miR156l	Chr07:5192240|5276163
1332	mdm-miR156m	Chr07:5192240|5276163
1333	mdm-miR156n	Chr07:5192240|5276163
1334	mdm-miR156o	Chr07:5192240|5276163
1335	mdm-miR156t	Chr07:5192240|5276163
1336	mdm-miR156u	Chr07:5192240|5276163
1337	mdm-miR156v	Chr07:5192240|5276163
1338	mdm-miR156w	Chr07:5192240|5276163
1339	mdm-miR7126	Chr07:5192240|5276163
1340	mdm-miR156a	Chr07:5196280|5282733
1341	mdm-miR156b	Chr07:5196280|5282733
1342	mdm-miR156c	Chr07:5196280|5282733
1343	mdm-miR156d	Chr07:5196280|5282733
1344	mdm-miR156e	Chr07:5196280|5282733
1345	mdm-miR156f	Chr07:5196280|5282733
1346	mdm-miR156g	Chr07:5196280|5282733
1347	mdm-miR156h	Chr07:5196280|5282733
1348	mdm-miR156i	Chr07:5196280|5282733
1349	mdm-miR156j	Chr07:5196280|5282733
1350	mdm-miR156k	Chr07:5196280|5282733
1351	mdm-miR156l	Chr07:5196280|5282733
1352	mdm-miR156m	Chr07:5196280|5282733
1353	mdm-miR156n	Chr07:5196280|5282733
1354	mdm-miR156o	Chr07:5196280|5282733
1355	mdm-miR156t	Chr07:5196280|5282733
1356	mdm-miR156u	Chr07:5196280|5282733
1357	mdm-miR156v	Chr07:5196280|5282733
1358	mdm-miR156w	Chr07:5196280|5282733
1359	mdm-miR7126	Chr07:5196280|5282733
1360	mdm-miR167b	Chr07:827204|857909
1361	mdm-miR167c	Chr07:827204|857909
1362	mdm-miR167d	Chr07:827204|857909
1363	mdm-miR167e	Chr07:827204|857909
1364	mdm-miR167f	Chr07:827204|857909
1365	mdm-miR167g	Chr07:827204|857909
1366	mdm-miR171i	Chr08:12108962|12175813
1367	mdm-miR482b	Chr08:12108962|12175813
1368	mdm-miR396b	Chr08:1434065|1464936
1369	mdm-miR156a	Chr08:24981968|25023512
1370	mdm-miR156aa	Chr08:24981968|25023512
1371	mdm-miR156ad	Chr08:24981968|25023512
1372	mdm-miR156ae	Chr08:24981968|25023512
1373	mdm-miR156b	Chr08:24981968|25023512
1374	mdm-miR156c	Chr08:24981968|25023512
1375	mdm-miR156d	Chr08:24981968|25023512
1376	mdm-miR156e	Chr08:24981968|25023512
1377	mdm-miR156f	Chr08:24981968|25023512
1378	mdm-miR156g	Chr08:24981968|25023512
1379	mdm-miR156h	Chr08:24981968|25023512
1380	mdm-miR156i	Chr08:24981968|25023512
1381	mdm-miR156j	Chr08:24981968|25023512
1382	mdm-miR156k	Chr08:24981968|25023512
1383	mdm-miR156l	Chr08:24981968|25023512
1384	mdm-miR156m	Chr08:24981968|25023512
1385	mdm-miR156n	Chr08:24981968|25023512
1386	mdm-miR156o	Chr08:24981968|25023512
1387	mdm-miR156p	Chr08:24981968|25023512
1388	mdm-miR156q	Chr08:24981968|25023512
1389	mdm-miR156r	Chr08:24981968|25023512
1390	mdm-miR156s	Chr08:24981968|25023512
1391	mdm-miR156t	Chr08:24981968|25023512
1392	mdm-miR156u	Chr08:24981968|25023512
1393	mdm-miR156v	Chr08:24981968|25023512
1394	mdm-miR156w	Chr08:24981968|25023512
1395	mdm-miR156x	Chr08:24981968|25023512
1396	mdm-miR156y	Chr08:24981968|25023512
1397	mdm-miR156z	Chr08:24981968|25023512
1398	mdm-miR162a	Chr08:24981968|25023512
1399	mdm-miR162b	Chr08:24981968|25023512
1400	mdm-miR828a	Chr08:26167273|26198783
1401	mdm-miR828b	Chr08:26167273|26198783
1402	mdm-miR828a	Chr08:26167438|26198125
1403	mdm-miR828b	Chr08:26167438|26198125
1404	mdm-miR828a	Chr08:26167640|26198114
1405	mdm-miR828b	Chr08:26167640|26198114
1406	mdm-miR828a	Chr08:26167640|26198125
1407	mdm-miR828b	Chr08:26167640|26198125
1408	mdm-miR7120a	Chr08:26170039|26209930
1409	mdm-miR7120b	Chr08:26170039|26209930
1410	mdm-miR828a	Chr08:26170039|26209930
1411	mdm-miR828b	Chr08:26170039|26209930
1412	mdm-miR7120a	Chr08:26170727|26210531
1413	mdm-miR7120b	Chr08:26170727|26210531
1414	mdm-miR828a	Chr08:26170727|26210531
1415	mdm-miR828b	Chr08:26170727|26210531
1416	mdm-miR7120a	Chr08:26180614|26213262
1417	mdm-miR7120b	Chr08:26180614|26213262
1418	mdm-miR162a	Chr08:26197769|26211509
1419	mdm-miR162b	Chr08:26197769|26211509
1420	mdm-miR7120a	Chr08:26197769|26211509
1421	mdm-miR7120b	Chr08:26197769|26211509
1422	mdm-miR7120a	Chr08:26197769|26213960
1423	mdm-miR7120b	Chr08:26197769|26213960
1424	mdm-miR171o	Chr08:26356931|26363729
1425	mdm-miR171o	Chr08:26359955|26363729
1426	mdm-miR172a	Chr08:26468047|26542478
1427	mdm-miR172b	Chr08:26468047|26542478
1428	mdm-miR172c	Chr08:26468047|26542478
1429	mdm-miR172d	Chr08:26468047|26542478
1430	mdm-miR172e	Chr08:26468047|26542478
1431	mdm-miR172f	Chr08:26468047|26542478
1432	mdm-miR172g	Chr08:26468047|26542478
1433	mdm-miR172h	Chr08:26468047|26542478
1434	mdm-miR172a	Chr08:26468047|26543467
1435	mdm-miR172b	Chr08:26468047|26543467
1436	mdm-miR172c	Chr08:26468047|26543467
1437	mdm-miR172d	Chr08:26468047|26543467
1438	mdm-miR172e	Chr08:26468047|26543467
1439	mdm-miR172f	Chr08:26468047|26543467
1440	mdm-miR172g	Chr08:26468047|26543467
1441	mdm-miR172h	Chr08:26468047|26543467
1442	mdm-miR172a	Chr08:26468313|26543609
1443	mdm-miR172b	Chr08:26468313|26543609
1444	mdm-miR172c	Chr08:26468313|26543609
1445	mdm-miR172d	Chr08:26468313|26543609
1446	mdm-miR172e	Chr08:26468313|26543609
1447	mdm-miR172f	Chr08:26468313|26543609
1448	mdm-miR172g	Chr08:26468313|26543609
1449	mdm-miR172h	Chr08:26468313|26543609
1450	mdm-miR172a	Chr08:26468800|26544081
1451	mdm-miR172b	Chr08:26468800|26544081
1452	mdm-miR172c	Chr08:26468800|26544081
1453	mdm-miR172d	Chr08:26468800|26544081
1454	mdm-miR172e	Chr08:26468800|26544081
1455	mdm-miR172f	Chr08:26468800|26544081
1456	mdm-miR172g	Chr08:26468800|26544081
1457	mdm-miR172h	Chr08:26468800|26544081
1458	mdm-miR172a	Chr08:26469487|26544892
1459	mdm-miR172b	Chr08:26469487|26544892
1460	mdm-miR172c	Chr08:26469487|26544892
1461	mdm-miR172d	Chr08:26469487|26544892
1462	mdm-miR172e	Chr08:26469487|26544892
1463	mdm-miR172f	Chr08:26469487|26544892
1464	mdm-miR172g	Chr08:26469487|26544892
1465	mdm-miR172h	Chr08:26469487|26544892
1466	mdm-miR172a	Chr08:26470956|26545934
1467	mdm-miR172b	Chr08:26470956|26545934
1468	mdm-miR172c	Chr08:26470956|26545934
1469	mdm-miR172d	Chr08:26470956|26545934
1470	mdm-miR172e	Chr08:26470956|26545934
1471	mdm-miR172f	Chr08:26470956|26545934
1472	mdm-miR172g	Chr08:26470956|26545934
1473	mdm-miR172h	Chr08:26470956|26545934
1474	mdm-miR172a	Chr08:26472734|26546625
1475	mdm-miR172b	Chr08:26472734|26546625
1476	mdm-miR172c	Chr08:26472734|26546625
1477	mdm-miR172d	Chr08:26472734|26546625
1478	mdm-miR172e	Chr08:26472734|26546625
1479	mdm-miR172f	Chr08:26472734|26546625
1480	mdm-miR172g	Chr08:26472734|26546625
1481	mdm-miR172h	Chr08:26472734|26546625
1482	mdm-miR159c	Chr08:26544792|26643692
1483	mdm-miR167b	Chr08:26544792|26643692
1484	mdm-miR167c	Chr08:26544792|26643692
1485	mdm-miR167d	Chr08:26544792|26643692
1486	mdm-miR167e	Chr08:26544792|26643692
1487	mdm-miR167f	Chr08:26544792|26643692
1488	mdm-miR167g	Chr08:26544792|26643692
1489	mdm-miR7120a	Chr08:26544792|26643692
1490	mdm-miR7120b	Chr08:26544792|26643692
1491	mdm-miR172a	Chr08:27695023|27714255
1492	mdm-miR172b	Chr08:27695023|27714255
1493	mdm-miR172c	Chr08:27695023|27714255
1494	mdm-miR172d	Chr08:27695023|27714255
1495	mdm-miR172e	Chr08:27695023|27714255
1496	mdm-miR172f	Chr08:27695023|27714255
1497	mdm-miR172g	Chr08:27695023|27714255
1498	mdm-miR172h	Chr08:27695023|27714255
1499	mdm-miR172i	Chr08:27695023|27714255
1500	mdm-miR172j	Chr08:27695023|27714255
1501	mdm-miR172k	Chr08:27695023|27714255
1502	mdm-miR1511	Chr08:29829666|29874944
1503	mdm-miR2111a	Chr08:29829666|29874944
1504	mdm-miR2111b	Chr08:29829666|29874944
1505	mdm-miR7120a	Chr08:29829666|29874944
1506	mdm-miR7120b	Chr08:29829666|29874944
1507	mdm-miR1511	Chr08:29829792|29875349
1508	mdm-miR2111a	Chr08:29829792|29875349
1509	mdm-miR2111b	Chr08:29829792|29875349
1510	mdm-miR7120a	Chr08:29829792|29875349
1511	mdm-miR7120b	Chr08:29829792|29875349
1512	mdm-miR1511	Chr08:29830627|29875437
1513	mdm-miR2111a	Chr08:29830627|29875437
1514	mdm-miR2111b	Chr08:29830627|29875437
1515	mdm-miR7120a	Chr08:29876241|29903527
1516	mdm-miR7120b	Chr08:29876241|29903527
1517	mdm-miR156ad	Chr08:3340011|3349116
1518	mdm-miR156ae	Chr08:3340011|3349116
1519	mdm-miR408b	Chr08:3404237|3445356
1520	mdm-miR408c	Chr08:3404237|3445356
1521	mdm-miR408d	Chr08:3404237|3445356
1522	mdm-miR408b	Chr08:3404280|3445399
1523	mdm-miR408c	Chr08:3404280|3445399
1524	mdm-miR408d	Chr08:3404280|3445399
1525	mdm-miR408b	Chr08:3416553|3459483
1526	mdm-miR408c	Chr08:3416553|3459483
1527	mdm-miR408d	Chr08:3416553|3459483
1528	mdm-miR319a	Chr08:4382656|4429858
1529	mdm-miR319b	Chr08:4382656|4429858
1530	mdm-miR396a	Chr08:4382656|4429858
1531	mdm-miR396b	Chr08:4382656|4429858
1532	mdm-miR482b	Chr08:4382656|4429858
1533	mdm-miR1511	Chr08:6911883|6938780
1534	mdm-miR7128	Chr08:6911883|6938780
1535	mdm-miR1511	Chr08:6914338|6941861
1536	mdm-miR7128	Chr08:6914338|6941861
1537	mdm-miR159c	Chr08:7751215|7770967
1538	mdm-miR482b	Chr08:7751215|7770967
1539	mdm-miR7120a	Chr08:9023956|9118666
1540	mdm-miR7120b	Chr08:9023956|9118666
1541	mdm-miR408b	Chr09:10043943|10063637
1542	mdm-miR408c	Chr09:10043943|10063637
1543	mdm-miR408d	Chr09:10043943|10063637
1544	mdm-miR7120a	Chr09:10043943|10063637
1545	mdm-miR7120b	Chr09:10043943|10063637
1546	mdm-miR408b	Chr09:10046331|10111386
1547	mdm-miR408c	Chr09:10046331|10111386
1548	mdm-miR408d	Chr09:10046331|10111386
1549	mdm-miR7120a	Chr09:10046331|10111386
1550	mdm-miR7120b	Chr09:10046331|10111386
1551	mdm-miR1511	Chr09:10716984|10745746
1552	mdm-miR1511	Chr09:10718585|10742875
1553	mdm-miR1511	Chr09:10718585|10742880
1554	mdm-miR1511	Chr09:10718585|10742887
1555	mdm-miR1511	Chr09:10718585|10743013
1556	mdm-miR162a	Chr09:10902822|10928033
1557	mdm-miR162b	Chr09:10902822|10928033
1558	mdm-miR162a	Chr09:10903444|10928571
1559	mdm-miR162b	Chr09:10903444|10928571
1560	mdm-miR159c	Chr09:11055810|11075290
1561	mdm-miR171o	Chr09:11269816|11270477
1562	mdm-miR408b	Chr09:1198089|1199010
1563	mdm-miR408c	Chr09:1198089|1199010
1564	mdm-miR408d	Chr09:1198089|1199010
1565	mdm-miR156a	Chr09:13870113|13935299
1566	mdm-miR156ad	Chr09:13870113|13935299
1567	mdm-miR156ae	Chr09:13870113|13935299
1568	mdm-miR156b	Chr09:13870113|13935299
1569	mdm-miR156c	Chr09:13870113|13935299
1570	mdm-miR156d	Chr09:13870113|13935299
1571	mdm-miR156e	Chr09:13870113|13935299
1572	mdm-miR156f	Chr09:13870113|13935299
1573	mdm-miR156g	Chr09:13870113|13935299
1574	mdm-miR156h	Chr09:13870113|13935299
1575	mdm-miR156i	Chr09:13870113|13935299
1576	mdm-miR156j	Chr09:13870113|13935299
1577	mdm-miR156k	Chr09:13870113|13935299
1578	mdm-miR156l	Chr09:13870113|13935299
1579	mdm-miR156m	Chr09:13870113|13935299
1580	mdm-miR156n	Chr09:13870113|13935299
1581	mdm-miR156o	Chr09:13870113|13935299
1582	mdm-miR156t	Chr09:13870113|13935299
1583	mdm-miR156u	Chr09:13870113|13935299
1584	mdm-miR156v	Chr09:13870113|13935299
1585	mdm-miR156w	Chr09:13870113|13935299
1586	mdm-miR828a	Chr09:13870113|13935299
1587	mdm-miR828b	Chr09:13870113|13935299
1588	mdm-miR1511	Chr09:14856637|14886052
1589	mdm-miR1511	Chr09:14857344|14886977
1590	mdm-miR159a	Chr09:15963471|15964206
1591	mdm-miR159b	Chr09:15963471|15964206
1592	mdm-miR535b	Chr09:17205938|17206544
1593	mdm-miR535c	Chr09:17205938|17206544
1594	mdm-miR172a	Chr09:17939215|17968190
1595	mdm-miR172b	Chr09:17939215|17968190
1596	mdm-miR172c	Chr09:17939215|17968190
1597	mdm-miR172d	Chr09:17939215|17968190
1598	mdm-miR172e	Chr09:17939215|17968190
1599	mdm-miR172f	Chr09:17939215|17968190
1600	mdm-miR172g	Chr09:17939215|17968190
1601	mdm-miR172h	Chr09:17939215|17968190
1602	mdm-miR172i	Chr09:17939215|17968190
1603	mdm-miR172j	Chr09:17939215|17968190
1604	mdm-miR172k	Chr09:17939215|17968190
1605	mdm-miR1511	Chr09:18210011|18262440
1606	mdm-miR396a	Chr09:18210011|18262440
1607	mdm-miR396b	Chr09:18210011|18262440
1608	mdm-miR396c	Chr09:18210011|18262440
1609	mdm-miR396d	Chr09:18210011|18262440
1610	mdm-miR396e	Chr09:18210011|18262440
1611	mdm-miR396f	Chr09:18210011|18262440
1612	mdm-miR396g	Chr09:18210011|18262440
1613	mdm-miR396a	Chr09:18294872|18308308
1614	mdm-miR396b	Chr09:18294872|18308308
1615	mdm-miR396c	Chr09:18294872|18308308
1616	mdm-miR396d	Chr09:18294872|18308308
1617	mdm-miR396e	Chr09:18294872|18308308
1618	mdm-miR396f	Chr09:18294872|18308308
1619	mdm-miR396g	Chr09:18294872|18308308
1620	mdm-miR159c	Chr09:1953845|1954080
1621	mdm-miR156aa	Chr09:20862296|20893042
1622	mdm-miR156ab	Chr09:20862296|20893042
1623	mdm-miR156ac	Chr09:20862296|20893042
1624	mdm-miR156p	Chr09:20862296|20893042
1625	mdm-miR156q	Chr09:20862296|20893042
1626	mdm-miR156r	Chr09:20862296|20893042
1627	mdm-miR156s	Chr09:20862296|20893042
1628	mdm-miR156x	Chr09:20862296|20893042
1629	mdm-miR156y	Chr09:20862296|20893042
1630	mdm-miR156z	Chr09:20862296|20893042
1631	mdm-miR156aa	Chr09:20862296|20893047
1632	mdm-miR156ab	Chr09:20862296|20893047
1633	mdm-miR156ac	Chr09:20862296|20893047
1634	mdm-miR156p	Chr09:20862296|20893047
1635	mdm-miR156q	Chr09:20862296|20893047
1636	mdm-miR156r	Chr09:20862296|20893047
1637	mdm-miR156s	Chr09:20862296|20893047
1638	mdm-miR156x	Chr09:20862296|20893047
1639	mdm-miR156y	Chr09:20862296|20893047
1640	mdm-miR156z	Chr09:20862296|20893047
1641	mdm-miR156a	Chr09:20862296|20959225
1642	mdm-miR156aa	Chr09:20862296|20959225
1643	mdm-miR156ab	Chr09:20862296|20959225
1644	mdm-miR156ac	Chr09:20862296|20959225
1645	mdm-miR156ad	Chr09:20862296|20959225
1646	mdm-miR156ae	Chr09:20862296|20959225
1647	mdm-miR156b	Chr09:20862296|20959225
1648	mdm-miR156c	Chr09:20862296|20959225
1649	mdm-miR156d	Chr09:20862296|20959225
1650	mdm-miR156e	Chr09:20862296|20959225
1651	mdm-miR156f	Chr09:20862296|20959225
1652	mdm-miR156g	Chr09:20862296|20959225
1653	mdm-miR156h	Chr09:20862296|20959225
1654	mdm-miR156i	Chr09:20862296|20959225
1655	mdm-miR156j	Chr09:20862296|20959225
1656	mdm-miR156k	Chr09:20862296|20959225
1657	mdm-miR156l	Chr09:20862296|20959225
1658	mdm-miR156m	Chr09:20862296|20959225
1659	mdm-miR156n	Chr09:20862296|20959225
1660	mdm-miR156o	Chr09:20862296|20959225
1661	mdm-miR156p	Chr09:20862296|20959225
1662	mdm-miR156q	Chr09:20862296|20959225
1663	mdm-miR156r	Chr09:20862296|20959225
1664	mdm-miR156s	Chr09:20862296|20959225
1665	mdm-miR156x	Chr09:20862296|20959225
1666	mdm-miR156y	Chr09:20862296|20959225
1667	mdm-miR156z	Chr09:20862296|20959225
1668	mdm-miR156aa	Chr09:20863616|20894962
1669	mdm-miR156ab	Chr09:20863616|20894962
1670	mdm-miR156ac	Chr09:20863616|20894962
1671	mdm-miR156p	Chr09:20863616|20894962
1672	mdm-miR156q	Chr09:20863616|20894962
1673	mdm-miR156r	Chr09:20863616|20894962
1674	mdm-miR156s	Chr09:20863616|20894962
1675	mdm-miR156x	Chr09:20863616|20894962
1676	mdm-miR156y	Chr09:20863616|20894962
1677	mdm-miR156z	Chr09:20863616|20894962
1678	mdm-miR156a	Chr09:20864132|20961709
1679	mdm-miR156ad	Chr09:20864132|20961709
1680	mdm-miR156ae	Chr09:20864132|20961709
1681	mdm-miR156b	Chr09:20864132|20961709
1682	mdm-miR156c	Chr09:20864132|20961709
1683	mdm-miR156d	Chr09:20864132|20961709
1684	mdm-miR156e	Chr09:20864132|20961709
1685	mdm-miR156f	Chr09:20864132|20961709
1686	mdm-miR156g	Chr09:20864132|20961709
1687	mdm-miR156h	Chr09:20864132|20961709
1688	mdm-miR156i	Chr09:20864132|20961709
1689	mdm-miR156j	Chr09:20864132|20961709
1690	mdm-miR156k	Chr09:20864132|20961709
1691	mdm-miR156l	Chr09:20864132|20961709
1692	mdm-miR156m	Chr09:20864132|20961709
1693	mdm-miR156n	Chr09:20864132|20961709
1694	mdm-miR156o	Chr09:20864132|20961709
1695	mdm-miR156a	Chr09:20865851|20963360
1696	mdm-miR156ad	Chr09:20865851|20963360
1697	mdm-miR156ae	Chr09:20865851|20963360
1698	mdm-miR156b	Chr09:20865851|20963360
1699	mdm-miR156c	Chr09:20865851|20963360
1700	mdm-miR156d	Chr09:20865851|20963360
1701	mdm-miR156e	Chr09:20865851|20963360
1702	mdm-miR156f	Chr09:20865851|20963360
1703	mdm-miR156g	Chr09:20865851|20963360
1704	mdm-miR156h	Chr09:20865851|20963360
1705	mdm-miR156i	Chr09:20865851|20963360
1706	mdm-miR156j	Chr09:20865851|20963360
1707	mdm-miR156k	Chr09:20865851|20963360
1708	mdm-miR156l	Chr09:20865851|20963360
1709	mdm-miR156m	Chr09:20865851|20963360
1710	mdm-miR156n	Chr09:20865851|20963360
1711	mdm-miR156o	Chr09:20865851|20963360
1712	mdm-miR156a	Chr09:20895093|20961140
1713	mdm-miR156ad	Chr09:20895093|20961140
1714	mdm-miR156ae	Chr09:20895093|20961140
1715	mdm-miR156b	Chr09:20895093|20961140
1716	mdm-miR156c	Chr09:20895093|20961140
1717	mdm-miR156d	Chr09:20895093|20961140
1718	mdm-miR156e	Chr09:20895093|20961140
1719	mdm-miR156f	Chr09:20895093|20961140
1720	mdm-miR156g	Chr09:20895093|20961140
1721	mdm-miR156h	Chr09:20895093|20961140
1722	mdm-miR156i	Chr09:20895093|20961140
1723	mdm-miR156j	Chr09:20895093|20961140
1724	mdm-miR156k	Chr09:20895093|20961140
1725	mdm-miR156l	Chr09:20895093|20961140
1726	mdm-miR156m	Chr09:20895093|20961140
1727	mdm-miR156n	Chr09:20895093|20961140
1728	mdm-miR156o	Chr09:20895093|20961140
1729	mdm-miR7124a	Chr09:2344793|2380643
1730	mdm-miR7124b	Chr09:2344793|2380643
1731	mdm-miR7124a	Chr09:2345512|2382179
1732	mdm-miR7124b	Chr09:2345512|2382179
1733	mdm-miR7124a	Chr09:2347005|2362409
1734	mdm-miR7124b	Chr09:2347005|2362409
1735	mdm-miR7124a	Chr09:2347005|2383968
1736	mdm-miR7124b	Chr09:2347005|2383968
1737	mdm-miR7124a	Chr09:2361539|2383099
1738	mdm-miR7124b	Chr09:2361539|2383099
1739	mdm-miR156ad	Chr09:2472406|2489506
1740	mdm-miR156ae	Chr09:2472406|2489506
1741	mdm-miR156ad	Chr09:2477814|2500540
1742	mdm-miR156ae	Chr09:2477814|2500540
1743	mdm-miR156aa	Chr09:28594909|28644519
1744	mdm-miR156ab	Chr09:28594909|28644519
1745	mdm-miR156ac	Chr09:28594909|28644519
1746	mdm-miR156x	Chr09:28594909|28644519
1747	mdm-miR156y	Chr09:28594909|28644519
1748	mdm-miR156z	Chr09:28594909|28644519
1749	mdm-miR319c	Chr09:28594909|28644519
1750	mdm-miR156ad	Chr09:29859806|29862379
1751	mdm-miR156ae	Chr09:29859806|29862379
1752	mdm-miR156ad	Chr09:32764902|32800901
1753	mdm-miR156ae	Chr09:32764902|32800901
1754	mdm-miR156t	Chr09:32764902|32800901
1755	mdm-miR156u	Chr09:32764902|32800901
1756	mdm-miR156v	Chr09:32764902|32800901
1757	mdm-miR156w	Chr09:32764902|32800901
1758	mdm-miR156ad	Chr09:32765657|32801276
1759	mdm-miR156ae	Chr09:32765657|32801276
1760	mdm-miR156t	Chr09:32765657|32801276
1761	mdm-miR156u	Chr09:32765657|32801276
1762	mdm-miR156v	Chr09:32765657|32801276
1763	mdm-miR156w	Chr09:32765657|32801276
1764	mdm-miR171o	Chr09:34347432|34412591
1765	mdm-miR535a	Chr09:34810599|34906342
1766	mdm-miR7122a	Chr09:34810599|34906342
1767	mdm-miR7122b	Chr09:34810599|34906342
1768	mdm-miR396a	Chr09:35208007|35306837
1769	mdm-miR7125	Chr09:35208007|35306837
1770	mdm-miR858	Chr09:35208007|35306837
1771	mdm-miR396a	Chr09:35216343|35314004
1772	mdm-miR7125	Chr09:35216343|35314004
1773	mdm-miR858	Chr09:35216343|35314004
1774	mdm-miR3627a	Chr09:35425344|35456372
1775	mdm-miR3627b	Chr09:35425344|35456372
1776	mdm-miR3627c	Chr09:35425344|35456372
1777	mdm-miR156ad	Chr09:35989094|36005591
1778	mdm-miR156ae	Chr09:35989094|36005591
1779	mdm-miR159a	Chr09:36523407|36523827
1780	mdm-miR159b	Chr09:36523407|36523827
1781	mdm-miR162a	Chr09:37057629|37068915
1782	mdm-miR162b	Chr09:37057629|37068915
1783	mdm-miR482a-5p	Chr09:5191680|5226302
1784	mdm-miR7127a	Chr09:5191680|5226302
1785	mdm-miR7127b	Chr09:5191680|5226302
1786	mdm-miR858	Chr09:5191680|5226302
1787	mdm-miR156ad	Chr09:5191680|5291345
1788	mdm-miR156ae	Chr09:5191680|5291345
1789	mdm-miR482a-5p	Chr09:5191680|5291345
1790	mdm-miR7127a	Chr09:5191680|5291345
1791	mdm-miR7127b	Chr09:5191680|5291345
1792	mdm-miR7128	Chr09:5191680|5291345
1793	mdm-miR858	Chr09:5191680|5291345
1794	mdm-miR482a-5p	Chr09:5192136|5227202
1795	mdm-miR7127a	Chr09:5192136|5227202
1796	mdm-miR7127b	Chr09:5192136|5227202
1797	mdm-miR858	Chr09:5192136|5227202
1798	mdm-miR156ad	Chr09:5226775|5291345
1799	mdm-miR156ae	Chr09:5226775|5291345
1800	mdm-miR7128	Chr09:5226775|5291345
1801	mdm-miR156ad	Chr09:5227530|5293453
1802	mdm-miR156ae	Chr09:5227530|5293453
1803	mdm-miR7128	Chr09:5227530|5293453
1804	mdm-miR477a	Chr09:6185329|6256316
1805	mdm-miR477a	Chr09:6185375|6256316
1806	mdm-miR156a	Chr09:7983095|8028049
1807	mdm-miR156b	Chr09:7983095|8028049
1808	mdm-miR156c	Chr09:7983095|8028049
1809	mdm-miR156d	Chr09:7983095|8028049
1810	mdm-miR156e	Chr09:7983095|8028049
1811	mdm-miR156f	Chr09:7983095|8028049
1812	mdm-miR156g	Chr09:7983095|8028049
1813	mdm-miR156h	Chr09:7983095|8028049
1814	mdm-miR156i	Chr09:7983095|8028049
1815	mdm-miR156j	Chr09:7983095|8028049
1816	mdm-miR156k	Chr09:7983095|8028049
1817	mdm-miR156l	Chr09:7983095|8028049
1818	mdm-miR156m	Chr09:7983095|8028049
1819	mdm-miR156n	Chr09:7983095|8028049
1820	mdm-miR156o	Chr09:7983095|8028049
1821	mdm-miR396b	Chr09:7983095|8028049
1822	mdm-miR396f	Chr09:7983095|8028049
1823	mdm-miR396g	Chr09:7983095|8028049
1824	mdm-miR7126	Chr09:7983095|8028049
1825	mdm-miR396c	Chr09:8747351|8747572
1826	mdm-miR396d	Chr09:8747351|8747572
1827	mdm-miR396e	Chr09:8747351|8747572
1828	mdm-miR7126	Chr09:9332039|9350168
1829	mdm-miR7126	Chr09:9333614|9353369
1830	mdm-miR7126	Chr09:9333614|9353563
1831	mdm-miR1511	Chr09:9847985|9873231
1832	mdm-miR396a	Chr10:11671119|11732233
1833	mdm-miR482d	Chr10:11671119|11732233
1834	mdm-miR396a	Chr10:11671119|11753534
1835	mdm-miR482d	Chr10:11671119|11753534
1836	mdm-miR396c	Chr10:12047046|12047750
1837	mdm-miR396d	Chr10:12047046|12047750
1838	mdm-miR396e	Chr10:12047046|12047750
1839	mdm-miR396c	Chr10:12047046|12048207
1840	mdm-miR396d	Chr10:12047046|12048207
1841	mdm-miR396e	Chr10:12047046|12048207
1842	mdm-miR396c	Chr10:12047046|12048525
1843	mdm-miR396d	Chr10:12047046|12048525
1844	mdm-miR396e	Chr10:12047046|12048525
1845	mdm-miR169e	Chr10:13141456|13175171
1846	mdm-miR169f	Chr10:13141456|13175171
1847	mdm-miR169e	Chr10:13145159|13178530
1848	mdm-miR169f	Chr10:13145159|13178530
1849	mdm-miR1511	Chr10:1743379|1840716
1850	mdm-miR7120a	Chr10:1743379|1840716
1851	mdm-miR7120b	Chr10:1743379|1840716
1852	mdm-miR535b	Chr10:1873557|1904549
1853	mdm-miR535c	Chr10:1873557|1904549
1854	mdm-miR535b	Chr10:1873557|1921462
1855	mdm-miR535c	Chr10:1873557|1921462
1856	mdm-miR167b	Chr10:2171770|2216818
1857	mdm-miR167c	Chr10:2171770|2216818
1858	mdm-miR167d	Chr10:2171770|2216818
1859	mdm-miR167e	Chr10:2171770|2216818
1860	mdm-miR167f	Chr10:2171770|2216818
1861	mdm-miR167g	Chr10:2171770|2216818
1862	mdm-miR482c	Chr10:2171770|2216818
1863	mdm-miR482b	Chr10:21815847|21821847
1864	mdm-miR477a	Chr10:22162231|22237793
1865	mdm-miR535b	Chr10:22162231|22237793
1866	mdm-miR535c	Chr10:22162231|22237793
1867	mdm-miR319a	Chr10:24006421|24018906
1868	mdm-miR319b	Chr10:24006421|24018906
1869	mdm-miR319a	Chr10:24006421|24018915
1870	mdm-miR319b	Chr10:24006421|24018915
1871	mdm-miR319a	Chr10:24006421|24019163
1872	mdm-miR319b	Chr10:24006421|24019163
1873	mdm-miR408a	Chr10:2563652|2574537
1874	mdm-miR156ad	Chr10:26678210|26707309
1875	mdm-miR156ae	Chr10:26678210|26707309
1876	mdm-miR164b	Chr10:27461607|27509417
1877	mdm-miR164c	Chr10:27461607|27509417
1878	mdm-miR164d	Chr10:27461607|27509417
1879	mdm-miR164e	Chr10:27461607|27509417
1880	mdm-miR164f	Chr10:27461607|27509417
1881	mdm-miR169e	Chr10:27461607|27509417
1882	mdm-miR169f	Chr10:27461607|27509417
1883	mdm-miR164b	Chr10:27462183|27509996
1884	mdm-miR164c	Chr10:27462183|27509996
1885	mdm-miR164d	Chr10:27462183|27509996
1886	mdm-miR164e	Chr10:27462183|27509996
1887	mdm-miR164f	Chr10:27462183|27509996
1888	mdm-miR169e	Chr10:27462183|27509996
1889	mdm-miR169f	Chr10:27462183|27509996
1890	mdm-miR1511	Chr10:2752168|2820922
1891	mdm-miR482c	Chr10:2752168|2820922
1892	mdm-miR1511	Chr10:2802992|2820916
1893	mdm-miR482c	Chr10:2802992|2820916
1894	mdm-miR1511	Chr10:2802997|2820922
1895	mdm-miR482c	Chr10:2802997|2820922
1896	mdm-miR7126	Chr10:3011659|3013003
1897	mdm-miR408b	Chr10:32021066|32056798
1898	mdm-miR408c	Chr10:32021066|32056798
1899	mdm-miR408d	Chr10:32021066|32056798
1900	mdm-miR171a	Chr10:32108151|32151179
1901	mdm-miR171b	Chr10:32108151|32151179
1902	mdm-miR319c	Chr10:32108151|32151179
1903	mdm-miR156ad	Chr10:33586652|33685151
1904	mdm-miR156ae	Chr10:33586652|33685151
1905	mdm-miR393d	Chr10:33586652|33685151
1906	mdm-miR393e	Chr10:33586652|33685151
1907	mdm-miR393f	Chr10:33586652|33685151
1908	mdm-miR393d	Chr10:33600886|33606401
1909	mdm-miR393e	Chr10:33600886|33606401
1910	mdm-miR393f	Chr10:33600886|33606401
1911	mdm-miR171o	Chr10:34718898|34755597
1912	mdm-miR172i	Chr10:34718898|34755597
1913	mdm-miR172j	Chr10:34718898|34755597
1914	mdm-miR172k	Chr10:34718898|34755597
1915	mdm-miR172i	Chr10:34724229|34761064
1916	mdm-miR172j	Chr10:34724229|34761064
1917	mdm-miR172k	Chr10:34724229|34761064
1918	mdm-miR156t	Chr10:39461721|39511397
1919	mdm-miR156u	Chr10:39461721|39511397
1920	mdm-miR156v	Chr10:39461721|39511397
1921	mdm-miR156w	Chr10:39461721|39511397
1922	mdm-miR156t	Chr10:39462915|39512577
1923	mdm-miR156u	Chr10:39462915|39512577
1924	mdm-miR156v	Chr10:39462915|39512577
1925	mdm-miR156w	Chr10:39462915|39512577
1926	mdm-miR395a	Chr10:39796932|39828439
1927	mdm-miR395b	Chr10:39796932|39828439
1928	mdm-miR395c	Chr10:39796932|39828439
1929	mdm-miR395d	Chr10:39796932|39828439
1930	mdm-miR395e	Chr10:39796932|39828439
1931	mdm-miR395f	Chr10:39796932|39828439
1932	mdm-miR395g	Chr10:39796932|39828439
1933	mdm-miR395h	Chr10:39796932|39828439
1934	mdm-miR395i	Chr10:39796932|39828439
1935	mdm-miR395a	Chr10:39798365|39830008
1936	mdm-miR395b	Chr10:39798365|39830008
1937	mdm-miR395c	Chr10:39798365|39830008
1938	mdm-miR395d	Chr10:39798365|39830008
1939	mdm-miR395e	Chr10:39798365|39830008
1940	mdm-miR395f	Chr10:39798365|39830008
1941	mdm-miR395g	Chr10:39798365|39830008
1942	mdm-miR395h	Chr10:39798365|39830008
1943	mdm-miR395i	Chr10:39798365|39830008
1944	mdm-miR156a	Chr10:40132274|40139896
1945	mdm-miR156b	Chr10:40132274|40139896
1946	mdm-miR156c	Chr10:40132274|40139896
1947	mdm-miR156d	Chr10:40132274|40139896
1948	mdm-miR156e	Chr10:40132274|40139896
1949	mdm-miR156f	Chr10:40132274|40139896
1950	mdm-miR156g	Chr10:40132274|40139896
1951	mdm-miR156h	Chr10:40132274|40139896
1952	mdm-miR156i	Chr10:40132274|40139896
1953	mdm-miR156j	Chr10:40132274|40139896
1954	mdm-miR156k	Chr10:40132274|40139896
1955	mdm-miR156l	Chr10:40132274|40139896
1956	mdm-miR156m	Chr10:40132274|40139896
1957	mdm-miR156n	Chr10:40132274|40139896
1958	mdm-miR156o	Chr10:40132274|40139896
1959	mdm-miR164a	Chr10:40755854|40756590
1960	mdm-miR319a	Chr10:41060497|41137024
1961	mdm-miR319b	Chr10:41060497|41137024
1962	mdm-miR394a	Chr10:41060497|41137024
1963	mdm-miR394b	Chr10:41060497|41137024
1964	mdm-miR7123a	Chr10:41060497|41137024
1965	mdm-miR7123b	Chr10:41060497|41137024
1966	mdm-miR156ad	Chr10:4486622|4557651
1967	mdm-miR156ae	Chr10:4486622|4557651
1968	mdm-miR156ad	Chr10:4503220|4566194
1969	mdm-miR156ae	Chr10:4503220|4566194
1970	mdm-miR168a	Chr10:6857495|6858910
1971	mdm-miR168b	Chr10:6857495|6858910
1972	mdm-miR159a	Chr10:9001471|9001630
1973	mdm-miR159b	Chr10:9001471|9001630
1974	mdm-miR477b	Chr11:11634743|11719550
1975	mdm-miR171o	Chr11:11843725|11843888
1976	mdm-miR858	Chr11:12236905|12241479
1977	mdm-miR477a	Chr11:1422287|1443134
1978	mdm-miR159c	Chr11:14452615|14453703
1979	mdm-miR156a	Chr11:1679470|1735533
1980	mdm-miR156aa	Chr11:1679470|1735533
1981	mdm-miR156ab	Chr11:1679470|1735533
1982	mdm-miR156ac	Chr11:1679470|1735533
1983	mdm-miR156b	Chr11:1679470|1735533
1984	mdm-miR156c	Chr11:1679470|1735533
1985	mdm-miR156d	Chr11:1679470|1735533
1986	mdm-miR156e	Chr11:1679470|1735533
1987	mdm-miR156f	Chr11:1679470|1735533
1988	mdm-miR156g	Chr11:1679470|1735533
1989	mdm-miR156h	Chr11:1679470|1735533
1990	mdm-miR156i	Chr11:1679470|1735533
1991	mdm-miR156j	Chr11:1679470|1735533
1992	mdm-miR156k	Chr11:1679470|1735533
1993	mdm-miR156l	Chr11:1679470|1735533
1994	mdm-miR156m	Chr11:1679470|1735533
1995	mdm-miR156n	Chr11:1679470|1735533
1996	mdm-miR156o	Chr11:1679470|1735533
1997	mdm-miR156x	Chr11:1679470|1735533
1998	mdm-miR156y	Chr11:1679470|1735533
[truncated: 1,082 more rows]
