# Supplementary material for: Expression Characteristics in Roots, Phloem, Leaves, Flowers and Fruits of Apple circRNA
Source: Genes (Basel). 2022 Apr 18;13(4):712. doi: 10.3390/genes13040712 (PMC9030095; doi:10.3390/genes13040712)
Supplement: Supplementary file 1 [file genes-13-00712-s001.zip › Table S11.xlsx]

## Sheet: Table S11-1
Table S11-1 Interactions between circRNAs and miRNAs in all five tissues
Code	miRNA	Target
1	mdm-miR172a	Chr01:21162287|21214009
2	mdm-miR172b	Chr01:21162287|21214009
3	mdm-miR172c	Chr01:21162287|21214009
4	mdm-miR172d	Chr01:21162287|21214009
5	mdm-miR172e	Chr01:21162287|21214009
6	mdm-miR172f	Chr01:21162287|21214009
7	mdm-miR172g	Chr01:21162287|21214009
8	mdm-miR172h	Chr01:21162287|21214009
9	mdm-miR7124a	Chr01:27381080|27387550
10	mdm-miR7124b	Chr01:27381080|27387550
11	mdm-miR156ad	Chr01:27955024|27993092
12	mdm-miR156ae	Chr01:27955024|27993092
13	mdm-miR1511	Chr01:28303728|28375275
14	mdm-miR156t	Chr02:12203646|12210619
15	mdm-miR156u	Chr02:12203646|12210619
16	mdm-miR156v	Chr02:12203646|12210619
17	mdm-miR156w	Chr02:12203646|12210619
18	mdm-miR156ad	Chr02:30311907|30404274
19	mdm-miR156ae	Chr02:30311907|30404274
20	mdm-miR396f	Chr02:30311907|30404274
21	mdm-miR396g	Chr02:30311907|30404274
22	mdm-miR7120a	Chr02:30311907|30404274
23	mdm-miR7120b	Chr02:30311907|30404274
24	mdm-miR164a	Chr02:31366499|31401832
25	mdm-miR393d	Chr02:31366499|31401832
26	mdm-miR393e	Chr02:31366499|31401832
27	mdm-miR393f	Chr02:31366499|31401832
28	mdm-miR1511	Chr02:4890119|4914867
29	mdm-miR156ad	Chr02:5999413|6019712
30	mdm-miR156ae	Chr02:5999413|6019712
31	mdm-miR482a-3p	Chr03:1226434|1277176
32	mdm-miR156ad	Chr03:1377367|1443660
33	mdm-miR156ae	Chr03:1377367|1443660
34	mdm-miR482d	Chr03:31052836|31064477
35	mdm-miR171m	Chr03:3854591|3949531
36	mdm-miR171n	Chr03:3854591|3949531
37	mdm-miR171m	Chr03:3945110|3956427
38	mdm-miR171n	Chr03:3945110|3956427
39	mdm-miR162a	Chr03:5086833|5103422
40	mdm-miR162b	Chr03:5086833|5103422
41	mdm-miR395a	Chr05:46571604|46605695
42	mdm-miR395b	Chr05:46571604|46605695
43	mdm-miR395c	Chr05:46571604|46605695
44	mdm-miR395d	Chr05:46571604|46605695
45	mdm-miR395e	Chr05:46571604|46605695
46	mdm-miR395f	Chr05:46571604|46605695
47	mdm-miR395g	Chr05:46571604|46605695
48	mdm-miR395h	Chr05:46571604|46605695
49	mdm-miR395i	Chr05:46571604|46605695
50	mdm-miR396c	Chr06:1184730|1211394
51	mdm-miR396d	Chr06:1184730|1211394
52	mdm-miR396e	Chr06:1184730|1211394
53	mdm-miR164a	Chr06:30040401|30055168
54	mdm-miR535b	Chr06:30040401|30055168
55	mdm-miR535c	Chr06:30040401|30055168
56	mdm-miR7123a	Chr07:14961657|15025748
57	mdm-miR7123b	Chr07:14961657|15025748
58	mdm-miR162a	Chr07:2587170|2630814
59	mdm-miR162b	Chr07:2587170|2630814
60	mdm-miR7120a	Chr08:26180615|26213262
61	mdm-miR7120b	Chr08:26180615|26213262
62	mdm-miR7124a	Chr09:2347006|2383968
63	mdm-miR7124b	Chr09:2347006|2383968
64	mdm-miR535a	Chr09:34810600|34906342
65	mdm-miR7122a	Chr09:34810600|34906342
66	mdm-miR7122b	Chr09:34810600|34906342
67	mdm-miR482a-5p	Chr09:5191681|5226302
68	mdm-miR7127a	Chr09:5191681|5226302
69	mdm-miR7127b	Chr09:5191681|5226302
70	mdm-miR858	Chr09:5191681|5226302
71	mdm-miR7126	Chr09:9333615|9353369
72	mdm-miR1511	Chr10:1743380|1840716
73	mdm-miR7120a	Chr10:1743380|1840716
74	mdm-miR7120b	Chr10:1743380|1840716
75	mdm-miR156a	Chr11:1679797|1735868
76	mdm-miR156aa	Chr11:1679797|1735868
77	mdm-miR156ab	Chr11:1679797|1735868
78	mdm-miR156ac	Chr11:1679797|1735868
79	mdm-miR156b	Chr11:1679797|1735868
80	mdm-miR156c	Chr11:1679797|1735868
81	mdm-miR156d	Chr11:1679797|1735868
82	mdm-miR156e	Chr11:1679797|1735868
83	mdm-miR156f	Chr11:1679797|1735868
84	mdm-miR156g	Chr11:1679797|1735868
85	mdm-miR156h	Chr11:1679797|1735868
86	mdm-miR156i	Chr11:1679797|1735868
87	mdm-miR156j	Chr11:1679797|1735868
88	mdm-miR156k	Chr11:1679797|1735868
89	mdm-miR156l	Chr11:1679797|1735868
90	mdm-miR156m	Chr11:1679797|1735868
91	mdm-miR156n	Chr11:1679797|1735868
92	mdm-miR156o	Chr11:1679797|1735868
93	mdm-miR156x	Chr11:1679797|1735868
94	mdm-miR156y	Chr11:1679797|1735868
95	mdm-miR156z	Chr11:1679797|1735868
96	mdm-miR7124a	Chr11:42023804|42032739
97	mdm-miR7124b	Chr11:42023804|42032739
98	mdm-miR156a	Chr11:632755|686146
99	mdm-miR156b	Chr11:632755|686146
100	mdm-miR156c	Chr11:632755|686146
101	mdm-miR156d	Chr11:632755|686146
102	mdm-miR156e	Chr11:632755|686146
103	mdm-miR156f	Chr11:632755|686146
104	mdm-miR156g	Chr11:632755|686146
105	mdm-miR156h	Chr11:632755|686146
106	mdm-miR156i	Chr11:632755|686146
107	mdm-miR156j	Chr11:632755|686146
108	mdm-miR156k	Chr11:632755|686146
109	mdm-miR156l	Chr11:632755|686146
110	mdm-miR156m	Chr11:632755|686146
111	mdm-miR156n	Chr11:632755|686146
112	mdm-miR156o	Chr11:632755|686146
113	mdm-miR395a	Chr11:632755|686146
114	mdm-miR395b	Chr11:632755|686146
115	mdm-miR395c	Chr11:632755|686146
116	mdm-miR395d	Chr11:632755|686146
117	mdm-miR395e	Chr11:632755|686146
118	mdm-miR395f	Chr11:632755|686146
119	mdm-miR395g	Chr11:632755|686146
120	mdm-miR395h	Chr11:632755|686146
121	mdm-miR395i	Chr11:632755|686146
122	mdm-miR7120a	Chr11:7074026|7092939
123	mdm-miR7120b	Chr11:7074026|7092939
124	mdm-miR156a	Chr12:31230507|31264265
125	mdm-miR156b	Chr12:31230507|31264265
126	mdm-miR156c	Chr12:31230507|31264265
127	mdm-miR156d	Chr12:31230507|31264265
128	mdm-miR156e	Chr12:31230507|31264265
129	mdm-miR156f	Chr12:31230507|31264265
130	mdm-miR156g	Chr12:31230507|31264265
131	mdm-miR156h	Chr12:31230507|31264265
132	mdm-miR156i	Chr12:31230507|31264265
133	mdm-miR156j	Chr12:31230507|31264265
134	mdm-miR156k	Chr12:31230507|31264265
135	mdm-miR156l	Chr12:31230507|31264265
136	mdm-miR156m	Chr12:31230507|31264265
137	mdm-miR156n	Chr12:31230507|31264265
138	mdm-miR156o	Chr12:31230507|31264265
139	mdm-miR172a	Chr12:31230507|31264265
140	mdm-miR172b	Chr12:31230507|31264265
141	mdm-miR172c	Chr12:31230507|31264265
142	mdm-miR172m	Chr12:31230507|31264265
143	mdm-miR172n	Chr12:31230507|31264265
144	mdm-miR172o	Chr12:31230507|31264265
145	mdm-miR7120a	Chr16:14069762|14146112
146	mdm-miR7120b	Chr16:14069762|14146112
147	mdm-miR7122a	Chr16:5782987|5793303
148	mdm-miR7122b	Chr16:5782987|5793303
149	mdm-miR535b	Chr17:10635463|10667592
150	mdm-miR535c	Chr17:10635463|10667592
151	mdm-miR395a	Chr17:14900486|14938412
152	mdm-miR395b	Chr17:14900486|14938412
153	mdm-miR395c	Chr17:14900486|14938412
154	mdm-miR395d	Chr17:14900486|14938412
155	mdm-miR395e	Chr17:14900486|14938412
156	mdm-miR395f	Chr17:14900486|14938412
157	mdm-miR395g	Chr17:14900486|14938412
158	mdm-miR395h	Chr17:14900486|14938412
159	mdm-miR395i	Chr17:14900486|14938412
160	mdm-miR535b	Chr17:14900486|14938412
161	mdm-miR535c	Chr17:14900486|14938412
162	mdm-miR482b	Chr17:1815159|1877319
163	mdm-miR172l	Chr17:32635930|32639418

## Sheet: Table S11-2
Table S11-2 Interactions between circRNAs and miRNAs in roots only
Code	miRNA	Target
1	mdm-miR3627a	Chr01:16171091|16204711
2	mdm-miR3627b	Chr01:16171091|16204711
3	mdm-miR3627c	Chr01:16171091|16204711
4	mdm-miR172a	Chr01:20782434|20828279
5	mdm-miR172b	Chr01:20782434|20828279
6	mdm-miR172c	Chr01:20782434|20828279
7	mdm-miR172l	Chr01:20782434|20828279
8	mdm-miR172m	Chr01:20782434|20828279
9	mdm-miR172n	Chr01:20782434|20828279
10	mdm-miR172o	Chr01:20782434|20828279
11	mdm-miR171g	Chr01:27864102|27921821
12	mdm-miR171h	Chr01:27864102|27921821
13	mdm-miR1511	Chr01:27874126|27951720
14	mdm-miR171g	Chr01:27874126|27951720
15	mdm-miR171h	Chr01:27874126|27951720
16	mdm-miR535a	Chr01:27874126|27951720
17	mdm-miR156aa	Chr01:30564019|30584622
18	mdm-miR156ab	Chr01:30564019|30584622
19	mdm-miR156ac	Chr01:30564019|30584622
20	mdm-miR156p	Chr01:30564019|30584622
21	mdm-miR156q	Chr01:30564019|30584622
22	mdm-miR156r	Chr01:30564019|30584622
23	mdm-miR156s	Chr01:30564019|30584622
24	mdm-miR156x	Chr01:30564019|30584622
25	mdm-miR156y	Chr01:30564019|30584622
26	mdm-miR156z	Chr01:30564019|30584622
27	mdm-miR156ad	Chr02:1414474|1439751
28	mdm-miR156ae	Chr02:1414474|1439751
29	mdm-miR156a	Chr02:2240672|2253520
30	mdm-miR156aa	Chr02:2240672|2253520
31	mdm-miR156b	Chr02:2240672|2253520
32	mdm-miR156c	Chr02:2240672|2253520
33	mdm-miR156d	Chr02:2240672|2253520
34	mdm-miR156e	Chr02:2240672|2253520
35	mdm-miR156f	Chr02:2240672|2253520
36	mdm-miR156g	Chr02:2240672|2253520
37	mdm-miR156h	Chr02:2240672|2253520
38	mdm-miR156i	Chr02:2240672|2253520
39	mdm-miR156j	Chr02:2240672|2253520
40	mdm-miR156k	Chr02:2240672|2253520
41	mdm-miR156l	Chr02:2240672|2253520
42	mdm-miR156m	Chr02:2240672|2253520
43	mdm-miR156n	Chr02:2240672|2253520
44	mdm-miR156o	Chr02:2240672|2253520
45	mdm-miR156t	Chr02:2240672|2253520
46	mdm-miR156u	Chr02:2240672|2253520
47	mdm-miR156v	Chr02:2240672|2253520
48	mdm-miR156w	Chr02:2240672|2253520
49	mdm-miR156x	Chr02:2240672|2253520
50	mdm-miR156y	Chr02:2240672|2253520
51	mdm-miR156z	Chr02:2240672|2253520
52	mdm-miR156ad	Chr02:30310246|30403956
53	mdm-miR156ae	Chr02:30310246|30403956
54	mdm-miR396f	Chr02:30310246|30403956
55	mdm-miR396g	Chr02:30310246|30403956
56	mdm-miR7120a	Chr02:30310246|30403956
57	mdm-miR7120b	Chr02:30310246|30403956
58	mdm-miR164a	Chr02:31360483|31404191
59	mdm-miR172a	Chr02:31360483|31404191
60	mdm-miR172b	Chr02:31360483|31404191
61	mdm-miR172c	Chr02:31360483|31404191
62	mdm-miR172d	Chr02:31360483|31404191
63	mdm-miR172e	Chr02:31360483|31404191
64	mdm-miR172f	Chr02:31360483|31404191
65	mdm-miR172g	Chr02:31360483|31404191
66	mdm-miR172h	Chr02:31360483|31404191
67	mdm-miR393d	Chr02:31360483|31404191
68	mdm-miR393e	Chr02:31360483|31404191
69	mdm-miR393f	Chr02:31360483|31404191
70	mdm-miR162a	Chr02:31783074|31800852
71	mdm-miR162b	Chr02:31783074|31800852
72	mdm-miR171a	Chr02:545875|548210
73	mdm-miR171b	Chr02:545875|548210
74	mdm-miR171a	Chr02:545895|548210
75	mdm-miR171b	Chr02:545895|548210
76	mdm-miR172a	Chr02:7832914|7861169
77	mdm-miR172b	Chr02:7832914|7861169
78	mdm-miR172c	Chr02:7832914|7861169
79	mdm-miR156ad	Chr02:8010385|8023151
80	mdm-miR156ae	Chr02:8010385|8023151
81	mdm-miR171a	Chr02:821945|824753
82	mdm-miR171b	Chr02:821945|824753
83	mdm-miR7127a	Chr02:8488249|8546281
84	mdm-miR7127b	Chr02:8488249|8546281
85	mdm-miR3627a	Chr03:2089800|2131827
86	mdm-miR3627b	Chr03:2089800|2131827
87	mdm-miR3627c	Chr03:2089800|2131827
88	mdm-miR172a	Chr03:36604088|36623687
89	mdm-miR172b	Chr03:36604088|36623687
90	mdm-miR172c	Chr03:36604088|36623687
91	mdm-miR172d	Chr03:36604088|36623687
92	mdm-miR172e	Chr03:36604088|36623687
93	mdm-miR172f	Chr03:36604088|36623687
94	mdm-miR172g	Chr03:36604088|36623687
95	mdm-miR172h	Chr03:36604088|36623687
96	mdm-miR172i	Chr03:36604088|36623687
97	mdm-miR172j	Chr03:36604088|36623687
98	mdm-miR172k	Chr03:36604088|36623687
99	mdm-miR159a	Chr03:8046395|8069300
100	mdm-miR159b	Chr03:8046395|8069300
101	mdm-miR162a	Chr04:1458387|1511433
102	mdm-miR162b	Chr04:1458387|1511433
103	mdm-miR171a	Chr04:1458387|1511433
104	mdm-miR171b	Chr04:1458387|1511433
105	mdm-miR162a	Chr04:1459522|1512534
106	mdm-miR162b	Chr04:1459522|1512534
107	mdm-miR171a	Chr04:1459522|1512534
108	mdm-miR171b	Chr04:1459522|1512534
109	mdm-miR162a	Chr04:1459581|1512313
110	mdm-miR162b	Chr04:1459581|1512313
111	mdm-miR171a	Chr04:1459581|1512313
112	mdm-miR171b	Chr04:1459581|1512313
113	mdm-miR156ad	Chr04:2788156|2878235
114	mdm-miR156ae	Chr04:2788156|2878235
115	mdm-miR159c	Chr04:2788156|2878235
116	mdm-miR395a	Chr04:3103132|3145653
117	mdm-miR395b	Chr04:3103132|3145653
118	mdm-miR395c	Chr04:3103132|3145653
119	mdm-miR395d	Chr04:3103132|3145653
120	mdm-miR395e	Chr04:3103132|3145653
121	mdm-miR395f	Chr04:3103132|3145653
122	mdm-miR395g	Chr04:3103132|3145653
123	mdm-miR395h	Chr04:3103132|3145653
124	mdm-miR395i	Chr04:3103132|3145653
125	mdm-miR167b	Chr04:3912161|3971202
126	mdm-miR167c	Chr04:3912161|3971202
127	mdm-miR167d	Chr04:3912161|3971202
128	mdm-miR167e	Chr04:3912161|3971202
129	mdm-miR167f	Chr04:3912161|3971202
130	mdm-miR167g	Chr04:3912161|3971202
131	mdm-miR156ad	Chr05:24825574|24885274
132	mdm-miR156ae	Chr05:24825574|24885274
133	mdm-miR2111a	Chr05:29494507|29495627
134	mdm-miR2111b	Chr05:29494507|29495627
135	mdm-miR172a	Chr05:36460138|36473167
136	mdm-miR172b	Chr05:36460138|36473167
137	mdm-miR172c	Chr05:36460138|36473167
138	mdm-miR172d	Chr05:36460138|36473167
139	mdm-miR172e	Chr05:36460138|36473167
140	mdm-miR172f	Chr05:36460138|36473167
141	mdm-miR172g	Chr05:36460138|36473167
142	mdm-miR172h	Chr05:36460138|36473167
143	mdm-miR172i	Chr05:36460138|36473167
144	mdm-miR172j	Chr05:36460138|36473167
145	mdm-miR172k	Chr05:36460138|36473167
146	mdm-miR172l	Chr05:36460138|36473167
147	mdm-miR172m	Chr05:36460138|36473167
148	mdm-miR172n	Chr05:36460138|36473167
149	mdm-miR172o	Chr05:36460138|36473167
150	mdm-miR172a	Chr05:36519798|36577616
151	mdm-miR172b	Chr05:36519798|36577616
152	mdm-miR172c	Chr05:36519798|36577616
153	mdm-miR172d	Chr05:36519798|36577616
154	mdm-miR172e	Chr05:36519798|36577616
155	mdm-miR172f	Chr05:36519798|36577616
156	mdm-miR172g	Chr05:36519798|36577616
157	mdm-miR172h	Chr05:36519798|36577616
158	mdm-miR172l	Chr05:36519798|36577616
159	mdm-miR172m	Chr05:36519798|36577616
160	mdm-miR172n	Chr05:36519798|36577616
161	mdm-miR172o	Chr05:36519798|36577616
162	mdm-miR395a	Chr05:44092469|44095265
163	mdm-miR395b	Chr05:44092469|44095265
164	mdm-miR395c	Chr05:44092469|44095265
165	mdm-miR395d	Chr05:44092469|44095265
166	mdm-miR395e	Chr05:44092469|44095265
167	mdm-miR395f	Chr05:44092469|44095265
168	mdm-miR395g	Chr05:44092469|44095265
169	mdm-miR395h	Chr05:44092469|44095265
170	mdm-miR395i	Chr05:44092469|44095265
171	mdm-miR171a	Chr05:45610488|45626542
172	mdm-miR171b	Chr05:45610488|45626542
173	mdm-miR171a	Chr05:45612195|45632173
174	mdm-miR171b	Chr05:45612195|45632173
175	mdm-miR535b	Chr06:30045028|30058857
176	mdm-miR535c	Chr06:30045028|30058857
177	mdm-miR7124a	Chr06:30076873|30077937
178	mdm-miR7124b	Chr06:30076873|30077937
179	mdm-miR396b	Chr07:11884798|11946915
180	mdm-miR396c	Chr07:11884798|11946915
181	mdm-miR396d	Chr07:11884798|11946915
182	mdm-miR396e	Chr07:11884798|11946915
183	mdm-miR1511	Chr07:1752543|1770180
184	mdm-miR172a	Chr07:1752543|1770180
185	mdm-miR172b	Chr07:1752543|1770180
186	mdm-miR172c	Chr07:1752543|1770180
187	mdm-miR172d	Chr07:1752543|1770180
188	mdm-miR172e	Chr07:1752543|1770180
189	mdm-miR172f	Chr07:1752543|1770180
190	mdm-miR172g	Chr07:1752543|1770180
191	mdm-miR172h	Chr07:1752543|1770180
192	mdm-miR172l	Chr07:1752543|1770180
193	mdm-miR172m	Chr07:1752543|1770180
194	mdm-miR172n	Chr07:1752543|1770180
195	mdm-miR172o	Chr07:1752543|1770180
196	mdm-miR172a	Chr07:31926622|31937403
197	mdm-miR172b	Chr07:31926622|31937403
198	mdm-miR172c	Chr07:31926622|31937403
199	mdm-miR172d	Chr07:31926622|31937403
200	mdm-miR172e	Chr07:31926622|31937403
201	mdm-miR172f	Chr07:31926622|31937403
202	mdm-miR172g	Chr07:31926622|31937403
203	mdm-miR172h	Chr07:31926622|31937403
204	mdm-miR172i	Chr07:31926622|31937403
205	mdm-miR172j	Chr07:31926622|31937403
206	mdm-miR172k	Chr07:31926622|31937403
207	mdm-miR172l	Chr07:31926622|31937403
208	mdm-miR172m	Chr07:31926622|31937403
209	mdm-miR172n	Chr07:31926622|31937403
210	mdm-miR172o	Chr07:31926622|31937403
211	mdm-miR162a	Chr08:26197770|26211509
212	mdm-miR162b	Chr08:26197770|26211509
213	mdm-miR7120a	Chr08:26197770|26211509
214	mdm-miR7120b	Chr08:26197770|26211509
215	mdm-miR159c	Chr08:7751216|7770967
216	mdm-miR482b	Chr08:7751216|7770967
217	mdm-miR156a	Chr09:13870114|13935299
218	mdm-miR156ad	Chr09:13870114|13935299
219	mdm-miR156ae	Chr09:13870114|13935299
220	mdm-miR156b	Chr09:13870114|13935299
221	mdm-miR156c	Chr09:13870114|13935299
222	mdm-miR156d	Chr09:13870114|13935299
223	mdm-miR156e	Chr09:13870114|13935299
224	mdm-miR156f	Chr09:13870114|13935299
225	mdm-miR156g	Chr09:13870114|13935299
226	mdm-miR156h	Chr09:13870114|13935299
227	mdm-miR156i	Chr09:13870114|13935299
228	mdm-miR156j	Chr09:13870114|13935299
229	mdm-miR156k	Chr09:13870114|13935299
230	mdm-miR156l	Chr09:13870114|13935299
231	mdm-miR156m	Chr09:13870114|13935299
232	mdm-miR156n	Chr09:13870114|13935299
233	mdm-miR156o	Chr09:13870114|13935299
234	mdm-miR156t	Chr09:13870114|13935299
235	mdm-miR156u	Chr09:13870114|13935299
236	mdm-miR156v	Chr09:13870114|13935299
237	mdm-miR156w	Chr09:13870114|13935299
238	mdm-miR828a	Chr09:13870114|13935299
239	mdm-miR828b	Chr09:13870114|13935299
240	mdm-miR159a	Chr09:15963472|15964206
241	mdm-miR159b	Chr09:15963472|15964206
242	mdm-miR172a	Chr09:17939216|17968190
243	mdm-miR172b	Chr09:17939216|17968190
244	mdm-miR172c	Chr09:17939216|17968190
245	mdm-miR172d	Chr09:17939216|17968190
246	mdm-miR172e	Chr09:17939216|17968190
247	mdm-miR172f	Chr09:17939216|17968190
248	mdm-miR172g	Chr09:17939216|17968190
249	mdm-miR172h	Chr09:17939216|17968190
250	mdm-miR172i	Chr09:17939216|17968190
251	mdm-miR172j	Chr09:17939216|17968190
252	mdm-miR172k	Chr09:17939216|17968190
253	mdm-miR7124a	Chr09:2347006|2362409
254	mdm-miR7124b	Chr09:2347006|2362409
255	mdm-miR7124a	Chr09:2361540|2383099
256	mdm-miR7124b	Chr09:2361540|2383099
257	mdm-miR3627a	Chr09:35425345|35456372
258	mdm-miR3627b	Chr09:35425345|35456372
259	mdm-miR3627c	Chr09:35425345|35456372
260	mdm-miR156ad	Chr09:5226776|5291345
261	mdm-miR156ae	Chr09:5226776|5291345
262	mdm-miR7128	Chr09:5226776|5291345
263	mdm-miR396c	Chr10:12047047|12048207
264	mdm-miR396d	Chr10:12047047|12048207
265	mdm-miR396e	Chr10:12047047|12048207
266	mdm-miR167b	Chr10:2171771|2216818
267	mdm-miR167c	Chr10:2171771|2216818
268	mdm-miR167d	Chr10:2171771|2216818
269	mdm-miR167e	Chr10:2171771|2216818
270	mdm-miR167f	Chr10:2171771|2216818
271	mdm-miR167g	Chr10:2171771|2216818
272	mdm-miR482c	Chr10:2171771|2216818
273	mdm-miR1511	Chr10:2802993|2820916
274	mdm-miR482c	Chr10:2802993|2820916
275	mdm-miR1511	Chr10:2802998|2820922
276	mdm-miR482c	Chr10:2802998|2820922
277	mdm-miR171a	Chr10:32108152|32151179
278	mdm-miR171b	Chr10:32108152|32151179
279	mdm-miR319c	Chr10:32108152|32151179
280	mdm-miR393d	Chr10:33600887|33606401
281	mdm-miR393e	Chr10:33600887|33606401
282	mdm-miR393f	Chr10:33600887|33606401
283	mdm-miR172i	Chr10:34724230|34761064
284	mdm-miR172j	Chr10:34724230|34761064
285	mdm-miR172k	Chr10:34724230|34761064
286	mdm-miR395a	Chr10:39796933|39828439
287	mdm-miR395b	Chr10:39796933|39828439
288	mdm-miR395c	Chr10:39796933|39828439
289	mdm-miR395d	Chr10:39796933|39828439
290	mdm-miR395e	Chr10:39796933|39828439
291	mdm-miR395f	Chr10:39796933|39828439
292	mdm-miR395g	Chr10:39796933|39828439
293	mdm-miR395h	Chr10:39796933|39828439
294	mdm-miR395i	Chr10:39796933|39828439
295	mdm-miR395a	Chr10:39798366|39830008
296	mdm-miR395b	Chr10:39798366|39830008
297	mdm-miR395c	Chr10:39798366|39830008
298	mdm-miR395d	Chr10:39798366|39830008
299	mdm-miR395e	Chr10:39798366|39830008
300	mdm-miR395f	Chr10:39798366|39830008
301	mdm-miR395g	Chr10:39798366|39830008
302	mdm-miR395h	Chr10:39798366|39830008
303	mdm-miR395i	Chr10:39798366|39830008
304	mdm-miR319a	Chr10:41060498|41137024
305	mdm-miR319b	Chr10:41060498|41137024
306	mdm-miR394a	Chr10:41060498|41137024
307	mdm-miR394b	Chr10:41060498|41137024
308	mdm-miR7123a	Chr10:41060498|41137024
309	mdm-miR7123b	Chr10:41060498|41137024
310	mdm-miR168a	Chr10:6857496|6858910
311	mdm-miR168b	Chr10:6857496|6858910
312	mdm-miR169a	Chr11:41797904|41828936
313	mdm-miR172l	Chr11:41797904|41828936
314	mdm-miR172m	Chr11:41797904|41828936
315	mdm-miR172n	Chr11:41797904|41828936
316	mdm-miR172o	Chr11:41797904|41828936
317	mdm-miR7123a	Chr11:4304609|4373879
318	mdm-miR7123b	Chr11:4304609|4373879
319	mdm-miR827	Chr11:4304609|4373879
320	mdm-miR156ad	Chr11:5531285|5555482
321	mdm-miR156ae	Chr11:5531285|5555482
322	mdm-miR482b	Chr11:5531285|5555482
323	mdm-miR3627a	Chr11:6487319|6510709
324	mdm-miR3627b	Chr11:6487319|6510709
325	mdm-miR3627c	Chr11:6487319|6510709
326	mdm-miR7120a	Chr11:7075111|7093866
327	mdm-miR7120b	Chr11:7075111|7093866
328	mdm-miR169c	Chr12:20180679|20246090
329	mdm-miR169d	Chr12:20180679|20246090
330	mdm-miR396c	Chr12:20180679|20246090
331	mdm-miR396d	Chr12:20180679|20246090
332	mdm-miR396e	Chr12:20180679|20246090
333	mdm-miR1511	Chr12:2062327|2107517
334	mdm-miR156a	Chr12:2062327|2107517
335	mdm-miR156aa	Chr12:2062327|2107517
336	mdm-miR156ab	Chr12:2062327|2107517
337	mdm-miR156ac	Chr12:2062327|2107517
338	mdm-miR156b	Chr12:2062327|2107517
339	mdm-miR156c	Chr12:2062327|2107517
340	mdm-miR156d	Chr12:2062327|2107517
341	mdm-miR156e	Chr12:2062327|2107517
342	mdm-miR156f	Chr12:2062327|2107517
343	mdm-miR156g	Chr12:2062327|2107517
344	mdm-miR156h	Chr12:2062327|2107517
345	mdm-miR156i	Chr12:2062327|2107517
346	mdm-miR156j	Chr12:2062327|2107517
347	mdm-miR156k	Chr12:2062327|2107517
348	mdm-miR156l	Chr12:2062327|2107517
349	mdm-miR156m	Chr12:2062327|2107517
350	mdm-miR156n	Chr12:2062327|2107517
351	mdm-miR156o	Chr12:2062327|2107517
352	mdm-miR156t	Chr12:2062327|2107517
353	mdm-miR156u	Chr12:2062327|2107517
354	mdm-miR156v	Chr12:2062327|2107517
355	mdm-miR156w	Chr12:2062327|2107517
356	mdm-miR156x	Chr12:2062327|2107517
357	mdm-miR156y	Chr12:2062327|2107517
358	mdm-miR156z	Chr12:2062327|2107517
359	mdm-miR393a	Chr12:27979410|27979566
360	mdm-miR393b	Chr12:27979410|27979566
361	mdm-miR393c	Chr12:27979410|27979566
362	mdm-miR172a	Chr14:18203306|18228195
363	mdm-miR172b	Chr14:18203306|18228195
364	mdm-miR172c	Chr14:18203306|18228195
365	mdm-miR172a	Chr14:23563790|23578423
366	mdm-miR172b	Chr14:23563790|23578423
367	mdm-miR172c	Chr14:23563790|23578423
368	mdm-miR164b	Chr15:1730367|1774720
369	mdm-miR164c	Chr15:1730367|1774720
370	mdm-miR164d	Chr15:1730367|1774720
371	mdm-miR164e	Chr15:1730367|1774720
372	mdm-miR164f	Chr15:1730367|1774720
373	mdm-miR535b	Chr15:36463302|36465901
374	mdm-miR535c	Chr15:36463302|36465901
375	mdm-miR156ad	Chr15:52456155|52456605
376	mdm-miR156ae	Chr15:52456155|52456605
377	mdm-miR169e	Chr15:5911300|5919459
378	mdm-miR169f	Chr15:5911300|5919459
379	mdm-miR172i	Chr15:952194|1045365
380	mdm-miR172j	Chr15:952194|1045365
381	mdm-miR172k	Chr15:952194|1045365
382	mdm-miR396f	Chr15:952194|1045365
383	mdm-miR396g	Chr15:952194|1045365
384	mdm-miR156aa	Chr16:11310656|11382354
385	mdm-miR156ab	Chr16:11310656|11382354
386	mdm-miR156ac	Chr16:11310656|11382354
387	mdm-miR156p	Chr16:11310656|11382354
388	mdm-miR156q	Chr16:11310656|11382354
389	mdm-miR156r	Chr16:11310656|11382354
390	mdm-miR156s	Chr16:11310656|11382354
391	mdm-miR156x	Chr16:11310656|11382354
392	mdm-miR156y	Chr16:11310656|11382354
393	mdm-miR156z	Chr16:11310656|11382354
394	mdm-miR535b	Chr16:11310656|11382354
395	mdm-miR535c	Chr16:11310656|11382354
396	mdm-miR7128	Chr16:11310656|11382354
397	mdm-miR7122a	Chr16:7154805|7154973
398	mdm-miR7122b	Chr16:7154805|7154973
399	mdm-miR535b	Chr17:10639152|10687189
400	mdm-miR535c	Chr17:10639152|10687189
401	mdm-miR164a	Chr17:28747966|28760545
402	mdm-miR171o	Chr17:28747966|28760545
403	mdm-miR1511	Chr17:29681770|29701556
404	mdm-miR395a	Chr17:29681770|29701556
405	mdm-miR395b	Chr17:29681770|29701556
406	mdm-miR395c	Chr17:29681770|29701556
407	mdm-miR395d	Chr17:29681770|29701556
408	mdm-miR395e	Chr17:29681770|29701556
409	mdm-miR395f	Chr17:29681770|29701556
410	mdm-miR395g	Chr17:29681770|29701556
411	mdm-miR395h	Chr17:29681770|29701556
412	mdm-miR395i	Chr17:29681770|29701556
413	mdm-miR7122a	Chr17:33668625|33750365
414	mdm-miR7122b	Chr17:33668625|33750365
415	mdm-miR167b	Chr17:5112775|5184546
416	mdm-miR167c	Chr17:5112775|5184546
417	mdm-miR167d	Chr17:5112775|5184546
418	mdm-miR167e	Chr17:5112775|5184546
419	mdm-miR167f	Chr17:5112775|5184546
420	mdm-miR167g	Chr17:5112775|5184546
421	mdm-miR167b	Chr17:5113052|5169977
422	mdm-miR167c	Chr17:5113052|5169977
423	mdm-miR167d	Chr17:5113052|5169977
424	mdm-miR167e	Chr17:5113052|5169977
425	mdm-miR167f	Chr17:5113052|5169977
426	mdm-miR167g	Chr17:5113052|5169977
427	mdm-miR399e	Chr17:8467374|8515771
428	mdm-miR399f	Chr17:8467374|8515771
429	mdm-miR399g	Chr17:8467374|8515771
430	mdm-miR399h	Chr17:8467374|8515771
431	mdm-miR477a	Chr17:8467374|8515771

## Sheet: Table S11-3
Table S11-3 Interactions between circRNAs and miRNAs in phloem only
Code	miRNA	Target
1	mdm-miR171f	Chr00:15611952|15612116
2	mdm-miR171g	Chr00:15611952|15612116
3	mdm-miR171h	Chr00:15611952|15612116
4	mdm-miR171m	Chr00:15611952|15612116
5	mdm-miR171n	Chr00:15611952|15612116
6	mdm-miR172a	Chr01:20780434|20878427
7	mdm-miR172b	Chr01:20780434|20878427
8	mdm-miR172c	Chr01:20780434|20878427
9	mdm-miR172l	Chr01:20780434|20878427
10	mdm-miR172m	Chr01:20780434|20878427
11	mdm-miR172n	Chr01:20780434|20878427
12	mdm-miR172o	Chr01:20780434|20878427
13	mdm-miR7124a	Chr01:27382002|27388581
14	mdm-miR7124b	Chr01:27382002|27388581
15	mdm-miR156t	Chr02:12203360|12210314
16	mdm-miR156u	Chr02:12203360|12210314
17	mdm-miR156v	Chr02:12203360|12210314
18	mdm-miR156w	Chr02:12203360|12210314
19	mdm-miR156t	Chr02:12205065|12219238
20	mdm-miR156u	Chr02:12205065|12219238
21	mdm-miR156v	Chr02:12205065|12219238
22	mdm-miR156w	Chr02:12205065|12219238
23	mdm-miR7122a	Chr02:13581506|13583167
24	mdm-miR7122b	Chr02:13581506|13583167
25	mdm-miR169e	Chr02:20212691|20212843
26	mdm-miR169f	Chr02:20212691|20212843
27	mdm-miR5225a	Chr02:35690968|35783690
28	mdm-miR5225b	Chr02:35690968|35783690
29	mdm-miR1511	Chr02:7314511|7411893
30	mdm-miR156a	Chr02:7314511|7411893
31	mdm-miR156b	Chr02:7314511|7411893
32	mdm-miR156c	Chr02:7314511|7411893
33	mdm-miR156d	Chr02:7314511|7411893
34	mdm-miR156e	Chr02:7314511|7411893
35	mdm-miR156f	Chr02:7314511|7411893
36	mdm-miR156g	Chr02:7314511|7411893
37	mdm-miR156h	Chr02:7314511|7411893
38	mdm-miR156i	Chr02:7314511|7411893
39	mdm-miR156j	Chr02:7314511|7411893
40	mdm-miR156k	Chr02:7314511|7411893
41	mdm-miR156l	Chr02:7314511|7411893
42	mdm-miR156m	Chr02:7314511|7411893
43	mdm-miR156n	Chr02:7314511|7411893
44	mdm-miR156o	Chr02:7314511|7411893
45	mdm-miR164b	Chr03:1030036|1094488
46	mdm-miR164c	Chr03:1030036|1094488
47	mdm-miR164d	Chr03:1030036|1094488
48	mdm-miR164e	Chr03:1030036|1094488
49	mdm-miR164f	Chr03:1030036|1094488
50	mdm-miR482d	Chr03:1030036|1094488
51	mdm-miR156ab	Chr03:1227295|1228996
52	mdm-miR156ac	Chr03:1227295|1228996
53	mdm-miR156ad	Chr03:1377274|1443567
54	mdm-miR156ae	Chr03:1377274|1443567
55	mdm-miR167b	Chr03:2040880|2078717
56	mdm-miR167c	Chr03:2040880|2078717
57	mdm-miR167d	Chr03:2040880|2078717
58	mdm-miR167e	Chr03:2040880|2078717
59	mdm-miR167f	Chr03:2040880|2078717
60	mdm-miR167g	Chr03:2040880|2078717
61	mdm-miR167h	Chr03:2040880|2078717
62	mdm-miR167i	Chr03:2040880|2078717
63	mdm-miR167j	Chr03:2040880|2078717
64	mdm-miR156ad	Chr04:3096853|3140035
65	mdm-miR156ae	Chr04:3096853|3140035
66	mdm-miR395a	Chr04:3096853|3140035
67	mdm-miR395b	Chr04:3096853|3140035
68	mdm-miR395c	Chr04:3096853|3140035
69	mdm-miR395d	Chr04:3096853|3140035
70	mdm-miR395e	Chr04:3096853|3140035
71	mdm-miR395f	Chr04:3096853|3140035
72	mdm-miR395g	Chr04:3096853|3140035
73	mdm-miR395h	Chr04:3096853|3140035
74	mdm-miR395i	Chr04:3096853|3140035
75	mdm-miR156ad	Chr04:3097166|3140929
76	mdm-miR156ae	Chr04:3097166|3140929
77	mdm-miR395a	Chr04:3097166|3140929
78	mdm-miR395b	Chr04:3097166|3140929
79	mdm-miR395c	Chr04:3097166|3140929
80	mdm-miR395d	Chr04:3097166|3140929
81	mdm-miR395e	Chr04:3097166|3140929
82	mdm-miR395f	Chr04:3097166|3140929
83	mdm-miR395g	Chr04:3097166|3140929
84	mdm-miR395h	Chr04:3097166|3140929
85	mdm-miR395i	Chr04:3097166|3140929
86	mdm-miR395a	Chr04:3114414|3148842
87	mdm-miR395b	Chr04:3114414|3148842
88	mdm-miR395c	Chr04:3114414|3148842
89	mdm-miR395d	Chr04:3114414|3148842
90	mdm-miR395e	Chr04:3114414|3148842
91	mdm-miR395f	Chr04:3114414|3148842
92	mdm-miR395g	Chr04:3114414|3148842
93	mdm-miR395h	Chr04:3114414|3148842
94	mdm-miR395i	Chr04:3114414|3148842
95	mdm-miR156ad	Chr04:3879583|3961011
96	mdm-miR156ae	Chr04:3879583|3961011
97	mdm-miR167b	Chr04:3879583|3961011
98	mdm-miR167c	Chr04:3879583|3961011
99	mdm-miR167d	Chr04:3879583|3961011
100	mdm-miR167e	Chr04:3879583|3961011
101	mdm-miR167f	Chr04:3879583|3961011
102	mdm-miR167g	Chr04:3879583|3961011
103	mdm-miR7126	Chr04:439393|501213
104	mdm-miR827	Chr04:439393|501213
105	mdm-miR1511	Chr05:21821886|21853409
106	mdm-miR3627a	Chr05:21821886|21853409
107	mdm-miR3627b	Chr05:21821886|21853409
108	mdm-miR3627c	Chr05:21821886|21853409
109	mdm-miR169e	Chr05:43378067|43447108
110	mdm-miR169f	Chr05:43378067|43447108
111	mdm-miR408b	Chr05:43378067|43447108
112	mdm-miR408c	Chr05:43378067|43447108
113	mdm-miR408d	Chr05:43378067|43447108
114	mdm-miR156ad	Chr05:7388516|7484072
115	mdm-miR156ae	Chr05:7388516|7484072
116	mdm-miR164b	Chr05:7388516|7484072
117	mdm-miR164c	Chr05:7388516|7484072
118	mdm-miR164d	Chr05:7388516|7484072
119	mdm-miR164e	Chr05:7388516|7484072
120	mdm-miR164f	Chr05:7388516|7484072
121	mdm-miR172a	Chr05:7388516|7484072
122	mdm-miR172b	Chr05:7388516|7484072
123	mdm-miR172c	Chr05:7388516|7484072
124	mdm-miR172m	Chr05:7388516|7484072
125	mdm-miR172n	Chr05:7388516|7484072
126	mdm-miR172o	Chr05:7388516|7484072
127	mdm-miR399d	Chr05:7388516|7484072
128	mdm-miR399i	Chr05:7388516|7484072
129	mdm-miR399j	Chr05:7388516|7484072
130	mdm-miR7127a	Chr05:7388516|7484072
131	mdm-miR7127b	Chr05:7388516|7484072
132	mdm-miR164a	Chr06:24689498|24734731
133	mdm-miR7126	Chr06:24689498|24734731
134	mdm-miR156ad	Chr06:25459412|25535842
135	mdm-miR156ae	Chr06:25459412|25535842
136	mdm-miR477a	Chr06:25459412|25535842
137	mdm-miR172i	Chr06:31528205|31617589
138	mdm-miR172j	Chr06:31528205|31617589
139	mdm-miR172k	Chr06:31528205|31617589
140	mdm-miR172l	Chr06:31528205|31617589
141	mdm-miR172m	Chr06:31528205|31617589
142	mdm-miR172n	Chr06:31528205|31617589
143	mdm-miR172o	Chr06:31528205|31617589
144	mdm-miR159a	Chr06:3961004|3966256
145	mdm-miR159b	Chr06:3961004|3966256
146	mdm-miR172i	Chr07:12121993|12212301
147	mdm-miR172j	Chr07:12121993|12212301
148	mdm-miR172k	Chr07:12121993|12212301
149	mdm-miR477b	Chr07:12121993|12212301
150	mdm-miR172i	Chr07:12123734|12149615
151	mdm-miR172j	Chr07:12123734|12149615
152	mdm-miR172k	Chr07:12123734|12149615
153	mdm-miR477b	Chr07:12123734|12149615
154	mdm-miR1511	Chr07:1752265|1819061
155	mdm-miR156a	Chr07:1752265|1819061
156	mdm-miR156b	Chr07:1752265|1819061
157	mdm-miR156c	Chr07:1752265|1819061
158	mdm-miR156d	Chr07:1752265|1819061
159	mdm-miR156e	Chr07:1752265|1819061
160	mdm-miR156f	Chr07:1752265|1819061
161	mdm-miR156g	Chr07:1752265|1819061
162	mdm-miR156h	Chr07:1752265|1819061
163	mdm-miR156i	Chr07:1752265|1819061
164	mdm-miR156j	Chr07:1752265|1819061
165	mdm-miR156k	Chr07:1752265|1819061
166	mdm-miR156l	Chr07:1752265|1819061
167	mdm-miR156m	Chr07:1752265|1819061
168	mdm-miR156n	Chr07:1752265|1819061
169	mdm-miR156o	Chr07:1752265|1819061
170	mdm-miR172a	Chr07:1752265|1819061
171	mdm-miR172b	Chr07:1752265|1819061
172	mdm-miR172c	Chr07:1752265|1819061
173	mdm-miR172d	Chr07:1752265|1819061
174	mdm-miR172e	Chr07:1752265|1819061
175	mdm-miR172f	Chr07:1752265|1819061
176	mdm-miR172g	Chr07:1752265|1819061
177	mdm-miR172h	Chr07:1752265|1819061
178	mdm-miR172l	Chr07:1752265|1819061
179	mdm-miR172m	Chr07:1752265|1819061
180	mdm-miR172n	Chr07:1752265|1819061
181	mdm-miR172o	Chr07:1752265|1819061
182	mdm-miR395a	Chr07:1752265|1819061
183	mdm-miR395b	Chr07:1752265|1819061
184	mdm-miR395c	Chr07:1752265|1819061
185	mdm-miR395d	Chr07:1752265|1819061
186	mdm-miR395e	Chr07:1752265|1819061
187	mdm-miR395f	Chr07:1752265|1819061
188	mdm-miR395g	Chr07:1752265|1819061
189	mdm-miR395h	Chr07:1752265|1819061
190	mdm-miR395i	Chr07:1752265|1819061
191	mdm-miR7126	Chr07:1752265|1819061
192	mdm-miR399i	Chr07:27689475|27699160
193	mdm-miR399j	Chr07:27689475|27699160
194	mdm-miR482d	Chr07:32614354|32651635
195	mdm-miR535d	Chr07:32614354|32651635
196	mdm-miR482d	Chr07:32615615|32683767
197	mdm-miR535d	Chr07:32615615|32683767
198	mdm-miR482d	Chr07:32617025|32685656
199	mdm-miR535d	Chr07:32617025|32685656
200	mdm-miR1511	Chr07:35941855|35963627
201	mdm-miR171a	Chr07:35941855|35963627
202	mdm-miR171b	Chr07:35941855|35963627
203	mdm-miR167b	Chr07:827205|857909
204	mdm-miR167c	Chr07:827205|857909
205	mdm-miR167d	Chr07:827205|857909
206	mdm-miR167e	Chr07:827205|857909
207	mdm-miR167f	Chr07:827205|857909
208	mdm-miR167g	Chr07:827205|857909
209	mdm-miR828a	Chr08:26167439|26198125
210	mdm-miR828b	Chr08:26167439|26198125
211	mdm-miR7120a	Chr08:26170040|26209930
212	mdm-miR7120b	Chr08:26170040|26209930
213	mdm-miR828a	Chr08:26170040|26209930
214	mdm-miR828b	Chr08:26170040|26209930
215	mdm-miR172a	Chr08:26468048|26542478
216	mdm-miR172b	Chr08:26468048|26542478
217	mdm-miR172c	Chr08:26468048|26542478
218	mdm-miR172d	Chr08:26468048|26542478
219	mdm-miR172e	Chr08:26468048|26542478
220	mdm-miR172f	Chr08:26468048|26542478
221	mdm-miR172g	Chr08:26468048|26542478
222	mdm-miR172h	Chr08:26468048|26542478
223	mdm-miR172a	Chr08:26468048|26543467
224	mdm-miR172b	Chr08:26468048|26543467
225	mdm-miR172c	Chr08:26468048|26543467
226	mdm-miR172d	Chr08:26468048|26543467
227	mdm-miR172e	Chr08:26468048|26543467
228	mdm-miR172f	Chr08:26468048|26543467
229	mdm-miR172g	Chr08:26468048|26543467
230	mdm-miR172h	Chr08:26468048|26543467
231	mdm-miR172a	Chr08:26470957|26545934
232	mdm-miR172b	Chr08:26470957|26545934
233	mdm-miR172c	Chr08:26470957|26545934
234	mdm-miR172d	Chr08:26470957|26545934
235	mdm-miR172e	Chr08:26470957|26545934
236	mdm-miR172f	Chr08:26470957|26545934
237	mdm-miR172g	Chr08:26470957|26545934
238	mdm-miR172h	Chr08:26470957|26545934
239	mdm-miR408b	Chr09:10046332|10111386
240	mdm-miR408c	Chr09:10046332|10111386
241	mdm-miR408d	Chr09:10046332|10111386
242	mdm-miR7120a	Chr09:10046332|10111386
243	mdm-miR7120b	Chr09:10046332|10111386
244	mdm-miR156aa	Chr09:28594910|28644519
245	mdm-miR156ab	Chr09:28594910|28644519
246	mdm-miR156ac	Chr09:28594910|28644519
247	mdm-miR156x	Chr09:28594910|28644519
248	mdm-miR156y	Chr09:28594910|28644519
249	mdm-miR156z	Chr09:28594910|28644519
250	mdm-miR319c	Chr09:28594910|28644519
251	mdm-miR156ad	Chr09:35989095|36005591
252	mdm-miR156ae	Chr09:35989095|36005591
253	mdm-miR169e	Chr10:13145160|13178530
254	mdm-miR169f	Chr10:13145160|13178530
255	mdm-miR156ad	Chr10:33586653|33685151
256	mdm-miR156ae	Chr10:33586653|33685151
257	mdm-miR393d	Chr10:33586653|33685151
258	mdm-miR393e	Chr10:33586653|33685151
259	mdm-miR393f	Chr10:33586653|33685151
260	mdm-miR164a	Chr11:2396885|2418141
261	mdm-miR172a	Chr11:2396885|2418141
262	mdm-miR172b	Chr11:2396885|2418141
263	mdm-miR172c	Chr11:2396885|2418141
264	mdm-miR172i	Chr11:2396885|2418141
265	mdm-miR172j	Chr11:2396885|2418141
266	mdm-miR172k	Chr11:2396885|2418141
267	mdm-miR172l	Chr11:2396885|2418141
268	mdm-miR172m	Chr11:2396885|2418141
269	mdm-miR172n	Chr11:2396885|2418141
270	mdm-miR172o	Chr11:2396885|2418141
271	mdm-miR1511	Chr11:2763807|2816700
272	mdm-miR171g	Chr11:2763807|2816700
273	mdm-miR171h	Chr11:2763807|2816700
274	mdm-miR159a	Chr11:3620429|3620941
275	mdm-miR159b	Chr11:3620429|3620941
276	mdm-miR159a	Chr11:38217458|38218448
277	mdm-miR159b	Chr11:38217458|38218448
278	mdm-miR156ad	Chr11:5523168|5572050
279	mdm-miR156ae	Chr11:5523168|5572050
280	mdm-miR482b	Chr11:5523168|5572050
281	mdm-miR156ad	Chr11:5533285|5572050
282	mdm-miR156ae	Chr11:5533285|5572050
283	mdm-miR482b	Chr11:5533285|5572050
284	mdm-miR156a	Chr11:632765|686146
285	mdm-miR156b	Chr11:632765|686146
286	mdm-miR156c	Chr11:632765|686146
287	mdm-miR156d	Chr11:632765|686146
288	mdm-miR156e	Chr11:632765|686146
289	mdm-miR156f	Chr11:632765|686146
290	mdm-miR156g	Chr11:632765|686146
291	mdm-miR156h	Chr11:632765|686146
292	mdm-miR156i	Chr11:632765|686146
293	mdm-miR156j	Chr11:632765|686146
294	mdm-miR156k	Chr11:632765|686146
295	mdm-miR156l	Chr11:632765|686146
296	mdm-miR156m	Chr11:632765|686146
297	mdm-miR156n	Chr11:632765|686146
298	mdm-miR156o	Chr11:632765|686146
299	mdm-miR395a	Chr11:632765|686146
300	mdm-miR395b	Chr11:632765|686146
301	mdm-miR395c	Chr11:632765|686146
302	mdm-miR395d	Chr11:632765|686146
303	mdm-miR395e	Chr11:632765|686146
304	mdm-miR395f	Chr11:632765|686146
305	mdm-miR395g	Chr11:632765|686146
306	mdm-miR395h	Chr11:632765|686146
307	mdm-miR395i	Chr11:632765|686146
308	mdm-miR7120a	Chr11:7073712|7091073
309	mdm-miR7120b	Chr11:7073712|7091073
310	mdm-miR172a	Chr11:9505702|9528255
311	mdm-miR172b	Chr11:9505702|9528255
312	mdm-miR172c	Chr11:9505702|9528255
313	mdm-miR172d	Chr11:9505702|9528255
314	mdm-miR172e	Chr11:9505702|9528255
315	mdm-miR172f	Chr11:9505702|9528255
316	mdm-miR172g	Chr11:9505702|9528255
317	mdm-miR172h	Chr11:9505702|9528255
318	mdm-miR172i	Chr11:9505702|9528255
319	mdm-miR172j	Chr11:9505702|9528255
320	mdm-miR172k	Chr11:9505702|9528255
321	mdm-miR172m	Chr11:9505702|9528255
322	mdm-miR172n	Chr11:9505702|9528255
323	mdm-miR172o	Chr11:9505702|9528255
324	mdm-miR169c	Chr12:20182055|20247188
325	mdm-miR169d	Chr12:20182055|20247188
326	mdm-miR396c	Chr12:20182055|20247188
327	mdm-miR396d	Chr12:20182055|20247188
328	mdm-miR396e	Chr12:20182055|20247188
329	mdm-miR7120a	Chr12:27461571|27476305
330	mdm-miR7120b	Chr12:27461571|27476305
331	mdm-miR162a	Chr12:29505585|29530653
332	mdm-miR162b	Chr12:29505585|29530653
333	mdm-miR156a	Chr12:32232526|32321691
334	mdm-miR156b	Chr12:32232526|32321691
335	mdm-miR156c	Chr12:32232526|32321691
336	mdm-miR156d	Chr12:32232526|32321691
337	mdm-miR156e	Chr12:32232526|32321691
338	mdm-miR156f	Chr12:32232526|32321691
339	mdm-miR156g	Chr12:32232526|32321691
340	mdm-miR156h	Chr12:32232526|32321691
341	mdm-miR156i	Chr12:32232526|32321691
342	mdm-miR156j	Chr12:32232526|32321691
343	mdm-miR156k	Chr12:32232526|32321691
344	mdm-miR156l	Chr12:32232526|32321691
345	mdm-miR156m	Chr12:32232526|32321691
346	mdm-miR156n	Chr12:32232526|32321691
347	mdm-miR156o	Chr12:32232526|32321691
348	mdm-miR171c	Chr12:32232526|32321691
349	mdm-miR171d	Chr12:32232526|32321691
350	mdm-miR171e	Chr12:32232526|32321691
351	mdm-miR535b	Chr12:32232526|32321691
352	mdm-miR535c	Chr12:32232526|32321691
353	mdm-miR535b	Chr12:32254802|32272048
354	mdm-miR535c	Chr12:32254802|32272048
355	mdm-miR535b	Chr12:32255815|32292805
356	mdm-miR535c	Chr12:32255815|32292805
357	mdm-miR535b	Chr12:32257011|32274217
358	mdm-miR535c	Chr12:32257011|32274217
359	mdm-miR156ad	Chr12:584451|592651
360	mdm-miR156ae	Chr12:584451|592651
361	mdm-miR828a	Chr13:11124017|11151106
362	mdm-miR828b	Chr13:11124017|11151106
363	mdm-miR535b	Chr14:1672728|1701770
364	mdm-miR535c	Chr14:1672728|1701770
365	mdm-miR7123a	Chr14:1672728|1701770
366	mdm-miR7123b	Chr14:1672728|1701770
367	mdm-miR535b	Chr14:1673084|1701985
368	mdm-miR535c	Chr14:1673084|1701985
369	mdm-miR7123a	Chr14:1673084|1701985
370	mdm-miR7123b	Chr14:1673084|1701985
371	mdm-miR535b	Chr14:1674641|1703765
372	mdm-miR535c	Chr14:1674641|1703765
373	mdm-miR7123a	Chr14:1674641|1703765
374	mdm-miR7123b	Chr14:1674641|1703765
375	mdm-miR171a	Chr14:6415955|6422790
376	mdm-miR171b	Chr14:6415955|6422790
377	mdm-miR162a	Chr14:7423187|7463471
378	mdm-miR162b	Chr14:7423187|7463471
379	mdm-miR535b	Chr14:7423187|7463471
380	mdm-miR535c	Chr14:7423187|7463471
381	mdm-miR156ad	Chr15:27191276|27192061
382	mdm-miR156ae	Chr15:27191276|27192061
383	mdm-miR171a	Chr15:50753944|50777758
384	mdm-miR171b	Chr15:50753944|50777758
385	mdm-miR167b	Chr16:10347354|10371280
386	mdm-miR167c	Chr16:10347354|10371280
387	mdm-miR167d	Chr16:10347354|10371280
388	mdm-miR167e	Chr16:10347354|10371280
389	mdm-miR167f	Chr16:10347354|10371280
390	mdm-miR167g	Chr16:10347354|10371280
391	mdm-miR171a	Chr16:10347354|10371280
392	mdm-miR171b	Chr16:10347354|10371280
393	mdm-miR167b	Chr16:10348540|10372674
394	mdm-miR167c	Chr16:10348540|10372674
395	mdm-miR167d	Chr16:10348540|10372674
396	mdm-miR167e	Chr16:10348540|10372674
397	mdm-miR167f	Chr16:10348540|10372674
398	mdm-miR167g	Chr16:10348540|10372674
399	mdm-miR171a	Chr16:10348540|10372674
400	mdm-miR171b	Chr16:10348540|10372674
401	mdm-miR7122a	Chr16:5772998|5789430
402	mdm-miR7122b	Chr16:5772998|5789430
403	mdm-miR159a	Chr17:4219563|4219720
404	mdm-miR159b	Chr17:4219563|4219720
405	mdm-miR319a	Chr17:4219563|4219720
406	mdm-miR319b	Chr17:4219563|4219720
407	mdm-miR156aa	Chr17:6430123|6449860
408	mdm-miR156p	Chr17:6430123|6449860
409	mdm-miR156q	Chr17:6430123|6449860
410	mdm-miR156r	Chr17:6430123|6449860
411	mdm-miR156s	Chr17:6430123|6449860
412	mdm-miR156x	Chr17:6430123|6449860
413	mdm-miR156y	Chr17:6430123|6449860
414	mdm-miR156z	Chr17:6430123|6449860

## Sheet: Table S11-4
Table S9 Interactions between circRNAs and miRNAs in leaves only
Code	miRNA	Target
1	mdm-miR1511	Chr08:6914339|6941861
2	mdm-miR156a	Chr17:6296154|6327108
3	mdm-miR156aa	Chr17:6430776|6452001
4	mdm-miR156aa	Chr03:26297306|26324247
5	mdm-miR156aa	Chr05:22911295|22972237
6	mdm-miR156ab	Chr05:22911295|22972237
7	mdm-miR156ac	Chr05:22911295|22972237
8	mdm-miR156ad	Chr10:26678211|26707309
9	mdm-miR156ad	Chr02:5997995|6018120
10	mdm-miR156ad	Chr03:2746979|2755047
11	mdm-miR156ad	Chr09:32764903|32800901
12	mdm-miR156ad	Chr17:6296154|6327108
13	mdm-miR156ad	Chr02:30540588|30586354
14	mdm-miR156ae	Chr03:2746979|2755047
15	mdm-miR156ae	Chr17:6296154|6327108
16	mdm-miR156ae	Chr02:30540588|30586354
17	mdm-miR156ae	Chr09:32764903|32800901
18	mdm-miR156ae	Chr02:5997995|6018120
19	mdm-miR156ae	Chr10:26678211|26707309
20	mdm-miR156b	Chr17:6296154|6327108
21	mdm-miR156c	Chr17:6296154|6327108
22	mdm-miR156d	Chr17:6296154|6327108
23	mdm-miR156e	Chr17:6296154|6327108
24	mdm-miR156f	Chr17:6296154|6327108
25	mdm-miR156g	Chr17:6296154|6327108
26	mdm-miR156h	Chr17:6296154|6327108
27	mdm-miR156i	Chr17:6296154|6327108
28	mdm-miR156j	Chr17:6296154|6327108
29	mdm-miR156k	Chr17:6296154|6327108
30	mdm-miR156l	Chr17:6296154|6327108
31	mdm-miR156m	Chr17:6296154|6327108
32	mdm-miR156n	Chr17:6296154|6327108
33	mdm-miR156o	Chr17:6296154|6327108
34	mdm-miR156p	Chr05:22911295|22972237
35	mdm-miR156p	Chr03:26297306|26324247
36	mdm-miR156p	Chr17:6430776|6452001
37	mdm-miR156p	Chr05:22123264|22128805
38	mdm-miR156q	Chr17:6430776|6452001
39	mdm-miR156q	Chr05:22911295|22972237
40	mdm-miR156q	Chr03:26297306|26324247
41	mdm-miR156q	Chr05:22123264|22128805
42	mdm-miR156r	Chr05:22123264|22128805
43	mdm-miR156r	Chr17:6430776|6452001
44	mdm-miR156r	Chr05:22911295|22972237
45	mdm-miR156r	Chr03:26297306|26324247
46	mdm-miR156s	Chr05:22123264|22128805
47	mdm-miR156s	Chr05:22911295|22972237
48	mdm-miR156s	Chr03:26297306|26324247
49	mdm-miR156s	Chr17:6430776|6452001
50	mdm-miR156t	Chr09:32764903|32800901
51	mdm-miR156u	Chr09:32764903|32800901
52	mdm-miR156v	Chr09:32764903|32800901
53	mdm-miR156w	Chr09:32764903|32800901
54	mdm-miR156x	Chr17:6430776|6452001
55	mdm-miR156x	Chr05:22911295|22972237
56	mdm-miR156x	Chr03:26297306|26324247
57	mdm-miR156y	Chr17:6430776|6452001
58	mdm-miR156y	Chr03:26297306|26324247
59	mdm-miR156y	Chr05:22911295|22972237
60	mdm-miR156z	Chr05:22911295|22972237
61	mdm-miR156z	Chr03:26297306|26324247
62	mdm-miR156z	Chr17:6430776|6452001
63	mdm-miR159a	Chr12:23820547|23867159
64	mdm-miR159a	Chr09:36523408|36523827
65	mdm-miR159a	Chr12:30883943|30891256
66	mdm-miR159a	Chr10:9001472|9001630
67	mdm-miR159a	Chr03:37007126|37021931
68	mdm-miR159b	Chr12:23820547|23867159
69	mdm-miR159b	Chr09:36523408|36523827
70	mdm-miR159b	Chr12:30883943|30891256
71	mdm-miR159b	Chr10:9001472|9001630
72	mdm-miR159b	Chr03:37007126|37021931
73	mdm-miR159c	Chr08:26544793|26643692
74	mdm-miR162a	Chr01:30957206|31007243
75	mdm-miR162a	Chr03:5086357|5103783
76	mdm-miR162a	Chr09:37057630|37068915
77	mdm-miR162b	Chr01:30957206|31007243
78	mdm-miR162b	Chr03:5086357|5103783
79	mdm-miR162b	Chr09:37057630|37068915
80	mdm-miR164b	Chr10:27461608|27509417
81	mdm-miR164c	Chr10:27461608|27509417
82	mdm-miR164d	Chr10:27461608|27509417
83	mdm-miR164e	Chr10:27461608|27509417
84	mdm-miR164f	Chr10:27461608|27509417
85	mdm-miR166a	Chr02:35453387|35460938
86	mdm-miR166b	Chr02:35453387|35460938
87	mdm-miR166c	Chr02:35453387|35460938
88	mdm-miR166d	Chr02:35453387|35460938
89	mdm-miR166e	Chr02:35453387|35460938
90	mdm-miR166f	Chr02:35453387|35460938
91	mdm-miR166g	Chr02:35453387|35460938
92	mdm-miR166h	Chr02:35453387|35460938
93	mdm-miR166i	Chr02:35453387|35460938
94	mdm-miR167b	Chr08:26544793|26643692
95	mdm-miR167c	Chr08:26544793|26643692
96	mdm-miR167d	Chr08:26544793|26643692
97	mdm-miR167e	Chr08:26544793|26643692
98	mdm-miR167f	Chr08:26544793|26643692
99	mdm-miR167g	Chr08:26544793|26643692
100	mdm-miR169e	Chr10:27461608|27509417
101	mdm-miR169e	Chr06:2915842|2953152
102	mdm-miR169f	Chr06:2915842|2953152
103	mdm-miR169f	Chr10:27461608|27509417
104	mdm-miR171a	Chr05:22911295|22972237
105	mdm-miR171a	Chr15:50753091|50776899
106	mdm-miR171b	Chr05:22911295|22972237
107	mdm-miR171b	Chr15:50753091|50776899
108	mdm-miR171i	Chr03:27604102|27615621
109	mdm-miR171i	Chr08:12108963|12175813
110	mdm-miR171j	Chr03:27604102|27615621
111	mdm-miR171k	Chr03:27604102|27615621
112	mdm-miR171l	Chr03:27604102|27615621
113	mdm-miR171m	Chr03:3945121|3957131
114	mdm-miR171n	Chr03:3945121|3957131
115	mdm-miR171o	Chr06:3683303|3742011
116	mdm-miR171o	Chr10:34718899|34755597
117	mdm-miR172a	Chr00:15360704|15361191
118	mdm-miR172a	Chr08:27695024|27714255
119	mdm-miR172a	Chr12:28480657|28483687
120	mdm-miR172a	Chr05:22911295|22972237
121	mdm-miR172a	Chr17:6296154|6327108
122	mdm-miR172b	Chr12:28480657|28483687
123	mdm-miR172b	Chr05:22911295|22972237
124	mdm-miR172b	Chr17:6296154|6327108
125	mdm-miR172b	Chr00:15360704|15361191
126	mdm-miR172b	Chr08:27695024|27714255
127	mdm-miR172c	Chr08:27695024|27714255
128	mdm-miR172c	Chr00:15360704|15361191
129	mdm-miR172c	Chr17:6296154|6327108
130	mdm-miR172c	Chr05:22911295|22972237
131	mdm-miR172c	Chr12:28480657|28483687
132	mdm-miR172d	Chr00:15360704|15361191
133	mdm-miR172d	Chr08:27695024|27714255
134	mdm-miR172d	Chr17:6296154|6327108
135	mdm-miR172e	Chr17:6296154|6327108
136	mdm-miR172e	Chr08:27695024|27714255
137	mdm-miR172e	Chr00:15360704|15361191
138	mdm-miR172f	Chr17:6296154|6327108
139	mdm-miR172f	Chr00:15360704|15361191
140	mdm-miR172f	Chr08:27695024|27714255
141	mdm-miR172g	Chr17:6296154|6327108
142	mdm-miR172g	Chr08:27695024|27714255
143	mdm-miR172g	Chr00:15360704|15361191
144	mdm-miR172h	Chr08:27695024|27714255
145	mdm-miR172h	Chr00:15360704|15361191
146	mdm-miR172h	Chr17:6296154|6327108
147	mdm-miR172i	Chr08:27695024|27714255
148	mdm-miR172i	Chr17:6296154|6327108
149	mdm-miR172i	Chr10:34718899|34755597
150	mdm-miR172j	Chr10:34718899|34755597
151	mdm-miR172j	Chr17:6296154|6327108
152	mdm-miR172j	Chr08:27695024|27714255
153	mdm-miR172k	Chr17:6296154|6327108
154	mdm-miR172k	Chr08:27695024|27714255
155	mdm-miR172k	Chr10:34718899|34755597
156	mdm-miR172m	Chr05:22911295|22972237
157	mdm-miR172n	Chr05:22911295|22972237
158	mdm-miR172o	Chr05:22911295|22972237
159	mdm-miR319a	Chr05:44489630|44519006
160	mdm-miR319a	Chr04:21368712|21428227
161	mdm-miR319b	Chr04:21368712|21428227
162	mdm-miR319b	Chr05:44489630|44519006
163	mdm-miR396a	Chr03:22369749|22385058
164	mdm-miR396c	Chr10:12047047|12047750
165	mdm-miR396c	Chr03:22369749|22385058
166	mdm-miR396c	Chr17:15075864|15079654
167	mdm-miR396c	Chr10:12047047|12048525
168	mdm-miR396d	Chr10:12047047|12047750
169	mdm-miR396d	Chr10:12047047|12048525
170	mdm-miR396d	Chr17:15075864|15079654
171	mdm-miR396d	Chr03:22369749|22385058
172	mdm-miR396e	Chr03:22369749|22385058
173	mdm-miR396e	Chr17:15075864|15079654
174	mdm-miR396e	Chr10:12047047|12048525
175	mdm-miR396e	Chr10:12047047|12047750
176	mdm-miR397a	Chr12:23820547|23867159
177	mdm-miR397b	Chr12:23820547|23867159
178	mdm-miR398a	Chr03:22369749|22385058
179	mdm-miR398b	Chr03:22369749|22385058
180	mdm-miR398c	Chr03:22369749|22385058
181	mdm-miR408b	Chr08:3416554|3459483
182	mdm-miR408b	Chr09:1198090|1199010
183	mdm-miR408b	Chr08:3404281|3445399
184	mdm-miR408c	Chr09:1198090|1199010
185	mdm-miR408c	Chr08:3404281|3445399
186	mdm-miR408c	Chr08:3416554|3459483
187	mdm-miR408d	Chr08:3416554|3459483
188	mdm-miR408d	Chr09:1198090|1199010
189	mdm-miR408d	Chr08:3404281|3445399
190	mdm-miR482b	Chr08:12108963|12175813
191	mdm-miR482b	Chr03:2746979|2755047
192	mdm-miR482c	Chr03:2746979|2755047
193	mdm-miR535b	Chr15:50024231|50025329
194	mdm-miR535b	Chr02:30540588|30586354
195	mdm-miR535b	Chr12:20144729|20144897
196	mdm-miR535b	Chr16:11282607|11362069
197	mdm-miR535b	Chr03:11306579|11309687
198	mdm-miR535c	Chr16:11282607|11362069
199	mdm-miR535c	Chr12:20144729|20144897
200	mdm-miR535c	Chr03:11306579|11309687
201	mdm-miR535c	Chr15:50024231|50025329
202	mdm-miR535c	Chr02:30540588|30586354
203	mdm-miR7120a	Chr08:26544793|26643692
204	mdm-miR7120a	Chr05:44489630|44519006
205	mdm-miR7120b	Chr05:44489630|44519006
206	mdm-miR7120b	Chr08:26544793|26643692
207	mdm-miR7122a	Chr06:3683303|3742011
208	mdm-miR7122a	Chr17:33670251|33751637
209	mdm-miR7122b	Chr06:3683303|3742011
210	mdm-miR7122b	Chr17:33670251|33751637
211	mdm-miR7124a	Chr06:3683303|3742011
212	mdm-miR7124b	Chr06:3683303|3742011
213	mdm-miR7128	Chr16:11282607|11362069
214	mdm-miR7128	Chr08:6914339|6941861

## Sheet: Table S11-5
Table S9 Interactions between circRNAs and miRNAs in flowers only
Code	miRNA	Target
1	mdm-miR1511	Chr06:379010|408463
2	mdm-miR156a	Chr16:16079478|16080208
3	mdm-miR156a	Chr11:1681609|1737768
4	mdm-miR156a	Chr07:5192241|5276163
5	mdm-miR156a	Chr09:20895094|20961140
6	mdm-miR156a	Chr02:3289985|3364703
7	mdm-miR156aa	Chr09:20862297|20893042
8	mdm-miR156aa	Chr16:19427701|19489181
9	mdm-miR156aa	Chr11:1681609|1737768
10	mdm-miR156aa	Chr16:19426565|19487929
11	mdm-miR156aa	Chr16:19427656|19489135
12	mdm-miR156ab	Chr11:1681609|1737768
13	mdm-miR156ab	Chr16:19427701|19489181
14	mdm-miR156ab	Chr16:19427656|19489135
15	mdm-miR156ab	Chr16:19426565|19487929
16	mdm-miR156ab	Chr09:20862297|20893042
17	mdm-miR156ab	Chr03:137389|137563
18	mdm-miR156ac	Chr16:19426565|19487929
19	mdm-miR156ac	Chr16:19427656|19489135
20	mdm-miR156ac	Chr16:19427701|19489181
21	mdm-miR156ac	Chr11:1681609|1737768
22	mdm-miR156ac	Chr03:137389|137563
23	mdm-miR156ac	Chr09:20862297|20893042
24	mdm-miR156ad	Chr09:5191681|5291345
25	mdm-miR156ad	Chr02:3289985|3364703
26	mdm-miR156ad	Chr15:41250316|41330614
27	mdm-miR156ad	Chr03:12690287|12773948
28	mdm-miR156ad	Chr17:33675991|33709709
29	mdm-miR156ad	Chr11:31791852|31811729
30	mdm-miR156ad	Chr09:20895094|20961140
31	mdm-miR156ad	Chr09:5227531|5293453
32	mdm-miR156ad	Chr12:4271835|4293087
33	mdm-miR156ae	Chr12:4271835|4293087
34	mdm-miR156ae	Chr11:31791852|31811729
35	mdm-miR156ae	Chr09:20895094|20961140
36	mdm-miR156ae	Chr09:5227531|5293453
37	mdm-miR156ae	Chr15:41250316|41330614
38	mdm-miR156ae	Chr09:5191681|5291345
39	mdm-miR156ae	Chr02:3289985|3364703
40	mdm-miR156ae	Chr17:33675991|33709709
41	mdm-miR156ae	Chr03:12690287|12773948
42	mdm-miR156b	Chr16:16079478|16080208
43	mdm-miR156b	Chr02:3289985|3364703
44	mdm-miR156b	Chr09:20895094|20961140
45	mdm-miR156b	Chr11:1681609|1737768
46	mdm-miR156b	Chr07:5192241|5276163
47	mdm-miR156c	Chr09:20895094|20961140
48	mdm-miR156c	Chr02:3289985|3364703
49	mdm-miR156c	Chr11:1681609|1737768
50	mdm-miR156c	Chr07:5192241|5276163
51	mdm-miR156c	Chr16:16079478|16080208
52	mdm-miR156d	Chr09:20895094|20961140
53	mdm-miR156d	Chr02:3289985|3364703
54	mdm-miR156d	Chr07:5192241|5276163
55	mdm-miR156d	Chr11:1681609|1737768
56	mdm-miR156d	Chr16:16079478|16080208
57	mdm-miR156e	Chr16:16079478|16080208
58	mdm-miR156e	Chr09:20895094|20961140
59	mdm-miR156e	Chr02:3289985|3364703
60	mdm-miR156e	Chr07:5192241|5276163
61	mdm-miR156e	Chr11:1681609|1737768
62	mdm-miR156f	Chr16:16079478|16080208
63	mdm-miR156f	Chr07:5192241|5276163
64	mdm-miR156f	Chr11:1681609|1737768
65	mdm-miR156f	Chr02:3289985|3364703
66	mdm-miR156f	Chr09:20895094|20961140
67	mdm-miR156g	Chr16:16079478|16080208
68	mdm-miR156g	Chr07:5192241|5276163
69	mdm-miR156g	Chr11:1681609|1737768
70	mdm-miR156g	Chr02:3289985|3364703
71	mdm-miR156g	Chr09:20895094|20961140
72	mdm-miR156h	Chr07:5192241|5276163
73	mdm-miR156h	Chr11:1681609|1737768
74	mdm-miR156h	Chr09:20895094|20961140
75	mdm-miR156h	Chr02:3289985|3364703
76	mdm-miR156h	Chr16:16079478|16080208
77	mdm-miR156i	Chr09:20895094|20961140
78	mdm-miR156i	Chr02:3289985|3364703
79	mdm-miR156i	Chr07:5192241|5276163
80	mdm-miR156i	Chr11:1681609|1737768
81	mdm-miR156i	Chr16:16079478|16080208
82	mdm-miR156j	Chr16:16079478|16080208
83	mdm-miR156j	Chr07:5192241|5276163
84	mdm-miR156j	Chr11:1681609|1737768
85	mdm-miR156j	Chr09:20895094|20961140
86	mdm-miR156j	Chr02:3289985|3364703
87	mdm-miR156k	Chr16:16079478|16080208
88	mdm-miR156k	Chr11:1681609|1737768
89	mdm-miR156k	Chr07:5192241|5276163
90	mdm-miR156k	Chr09:20895094|20961140
91	mdm-miR156k	Chr02:3289985|3364703
92	mdm-miR156l	Chr02:3289985|3364703
93	mdm-miR156l	Chr09:20895094|20961140
94	mdm-miR156l	Chr11:1681609|1737768
95	mdm-miR156l	Chr07:5192241|5276163
96	mdm-miR156l	Chr16:16079478|16080208
97	mdm-miR156m	Chr09:20895094|20961140
98	mdm-miR156m	Chr02:3289985|3364703
99	mdm-miR156m	Chr07:5192241|5276163
100	mdm-miR156m	Chr11:1681609|1737768
101	mdm-miR156m	Chr16:16079478|16080208
102	mdm-miR156n	Chr16:16079478|16080208
103	mdm-miR156n	Chr02:3289985|3364703
104	mdm-miR156n	Chr09:20895094|20961140
105	mdm-miR156n	Chr11:1681609|1737768
106	mdm-miR156n	Chr07:5192241|5276163
107	mdm-miR156o	Chr16:16079478|16080208
108	mdm-miR156o	Chr07:5192241|5276163
109	mdm-miR156o	Chr11:1681609|1737768
110	mdm-miR156o	Chr02:3289985|3364703
111	mdm-miR156o	Chr09:20895094|20961140
112	mdm-miR156p	Chr09:20862297|20893042
113	mdm-miR156p	Chr16:19427656|19489135
114	mdm-miR156p	Chr16:19426565|19487929
115	mdm-miR156p	Chr16:19427701|19489181
116	mdm-miR156q	Chr09:20862297|20893042
117	mdm-miR156q	Chr16:19427701|19489181
118	mdm-miR156q	Chr16:19427656|19489135
119	mdm-miR156q	Chr16:19426565|19487929
120	mdm-miR156r	Chr16:19427701|19489181
121	mdm-miR156r	Chr16:19427656|19489135
122	mdm-miR156r	Chr16:19426565|19487929
123	mdm-miR156r	Chr09:20862297|20893042
124	mdm-miR156s	Chr16:19426565|19487929
125	mdm-miR156s	Chr16:19427656|19489135
126	mdm-miR156s	Chr16:19427701|19489181
127	mdm-miR156s	Chr09:20862297|20893042
128	mdm-miR156t	Chr16:16079478|16080208
129	mdm-miR156t	Chr07:5192241|5276163
130	mdm-miR156t	Chr11:31791852|31811729
131	mdm-miR156u	Chr11:31791852|31811729
132	mdm-miR156u	Chr16:16079478|16080208
133	mdm-miR156u	Chr07:5192241|5276163
134	mdm-miR156v	Chr11:31791852|31811729
135	mdm-miR156v	Chr16:16079478|16080208
136	mdm-miR156v	Chr07:5192241|5276163
137	mdm-miR156w	Chr11:31791852|31811729
138	mdm-miR156w	Chr16:16079478|16080208
139	mdm-miR156w	Chr07:5192241|5276163
140	mdm-miR156x	Chr16:19427701|19489181
141	mdm-miR156x	Chr11:1681609|1737768
142	mdm-miR156x	Chr16:19427656|19489135
143	mdm-miR156x	Chr16:19426565|19487929
144	mdm-miR156x	Chr09:20862297|20893042
145	mdm-miR156y	Chr16:19427701|19489181
146	mdm-miR156y	Chr11:1681609|1737768
147	mdm-miR156y	Chr16:19427656|19489135
148	mdm-miR156y	Chr16:19426565|19487929
149	mdm-miR156y	Chr09:20862297|20893042
150	mdm-miR156z	Chr09:20862297|20893042
151	mdm-miR156z	Chr16:19427656|19489135
152	mdm-miR156z	Chr16:19426565|19487929
153	mdm-miR156z	Chr16:19427701|19489181
154	mdm-miR156z	Chr11:1681609|1737768
155	mdm-miR159c	Chr11:14452616|14453703
156	mdm-miR159c	Chr07:2900025|2998060
157	mdm-miR160a	Chr00:18744403|18744580
158	mdm-miR160b	Chr00:18744403|18744580
159	mdm-miR160c	Chr00:18744403|18744580
160	mdm-miR160d	Chr00:18744403|18744580
161	mdm-miR160e	Chr00:18744403|18744580
162	mdm-miR162a	Chr07:2443337|2481759
163	mdm-miR162a	Chr15:41250316|41330614
164	mdm-miR162a	Chr14:27856915|27892471
165	mdm-miR162b	Chr07:2443337|2481759
166	mdm-miR162b	Chr14:27856915|27892471
167	mdm-miR162b	Chr15:41250316|41330614
168	mdm-miR167a	Chr02:5383557|5401747
169	mdm-miR167b	Chr05:36802434|36850954
170	mdm-miR167b	Chr03:12690287|12773948
171	mdm-miR167c	Chr03:12690287|12773948
172	mdm-miR167c	Chr05:36802434|36850954
173	mdm-miR167d	Chr03:12690287|12773948
174	mdm-miR167d	Chr05:36802434|36850954
175	mdm-miR167e	Chr05:36802434|36850954
176	mdm-miR167e	Chr03:12690287|12773948
177	mdm-miR167f	Chr05:36802434|36850954
178	mdm-miR167f	Chr03:12690287|12773948
179	mdm-miR167g	Chr03:12690287|12773948
180	mdm-miR167g	Chr05:36802434|36850954
181	mdm-miR171a	Chr04:6232453|6246599
182	mdm-miR171a	Chr12:26023957|26037465
183	mdm-miR171a	Chr02:3289985|3364703
184	mdm-miR171b	Chr12:26023957|26037465
185	mdm-miR171b	Chr02:3289985|3364703
186	mdm-miR171b	Chr04:6232453|6246599
187	mdm-miR171c	Chr04:6232453|6246599
188	mdm-miR171d	Chr04:6232453|6246599
189	mdm-miR171e	Chr04:6232453|6246599
190	mdm-miR171o	Chr01:17783278|17785127
191	mdm-miR171o	Chr02:17754975|17810547
192	mdm-miR172a	Chr11:31791852|31811729
193	mdm-miR172a	Chr07:31926743|31937129
194	mdm-miR172a	Chr12:28480657|28483417
195	mdm-miR172b	Chr12:28480657|28483417
196	mdm-miR172b	Chr11:31791852|31811729
197	mdm-miR172b	Chr07:31926743|31937129
198	mdm-miR172c	Chr07:31926743|31937129
199	mdm-miR172c	Chr11:31791852|31811729
200	mdm-miR172c	Chr12:28480657|28483417
201	mdm-miR172d	Chr07:31926743|31937129
202	mdm-miR172e	Chr07:31926743|31937129
203	mdm-miR172f	Chr07:31926743|31937129
204	mdm-miR172g	Chr07:31926743|31937129
205	mdm-miR172h	Chr07:31926743|31937129
206	mdm-miR172i	Chr07:31926743|31937129
207	mdm-miR172j	Chr07:31926743|31937129
208	mdm-miR172k	Chr07:31926743|31937129
209	mdm-miR172l	Chr07:31926743|31937129
210	mdm-miR172m	Chr07:31926743|31937129
211	mdm-miR172n	Chr07:31926743|31937129
212	mdm-miR172o	Chr07:31926743|31937129
213	mdm-miR2118a	Chr11:42372632|42440407
214	mdm-miR2118b	Chr11:42372632|42440407
215	mdm-miR2118c	Chr11:42372632|42440407
216	mdm-miR319a	Chr11:31791852|31811729
217	mdm-miR319b	Chr11:31791852|31811729
218	mdm-miR319c	Chr11:22248049|22249316
219	mdm-miR393a	Chr14:759922|762654
220	mdm-miR393b	Chr14:759922|762654
221	mdm-miR393c	Chr14:759922|762654
222	mdm-miR393d	Chr14:27856915|27892471
223	mdm-miR393e	Chr14:27856915|27892471
224	mdm-miR393f	Chr14:27856915|27892471
225	mdm-miR396b	Chr02:32119229|32131999
226	mdm-miR396b	Chr02:4261528|4343053
227	mdm-miR396c	Chr11:42372632|42440407
228	mdm-miR396d	Chr11:42372632|42440407
229	mdm-miR396e	Chr11:42372632|42440407
230	mdm-miR399a	Chr07:4824513|4852092
231	mdm-miR399b	Chr07:4824513|4852092
232	mdm-miR399c	Chr07:4824513|4852092
233	mdm-miR408b	Chr08:3404238|3445356
234	mdm-miR408b	Chr07:2900025|2998060
235	mdm-miR408c	Chr08:3404238|3445356
236	mdm-miR408c	Chr07:2900025|2998060
237	mdm-miR408d	Chr08:3404238|3445356
238	mdm-miR408d	Chr07:2900025|2998060
239	mdm-miR477a	Chr10:22162232|22237793
240	mdm-miR477b	Chr11:11634744|11719550
241	mdm-miR482a-5p	Chr11:31791852|31811729
242	mdm-miR482a-5p	Chr09:5192137|5227202
243	mdm-miR482a-5p	Chr09:5191681|5291345
244	mdm-miR482b	Chr11:6662819|6705282
245	mdm-miR5225a	Chr02:35719121|35742554
246	mdm-miR5225b	Chr02:35719121|35742554
247	mdm-miR535a	Chr05:28453544|28466519
248	mdm-miR535b	Chr05:28453544|28466519
249	mdm-miR535b	Chr03:12690287|12773948
250	mdm-miR535b	Chr10:22162232|22237793
251	mdm-miR535b	Chr09:17205939|17206544
252	mdm-miR535b	Chr14:1674796|1703770
253	mdm-miR535b	Chr16:11267911|11350971
254	mdm-miR535c	Chr14:1674796|1703770
255	mdm-miR535c	Chr16:11267911|11350971
256	mdm-miR535c	Chr05:28453544|28466519
257	mdm-miR535c	Chr03:12690287|12773948
258	mdm-miR535c	Chr09:17205939|17206544
259	mdm-miR535c	Chr10:22162232|22237793
260	mdm-miR535d	Chr05:28453544|28466519
261	mdm-miR7120a	Chr05:36223206|36277248
262	mdm-miR7120a	Chr05:36221550|36275677
263	mdm-miR7120a	Chr00:6748729|6751911
264	mdm-miR7120a	Chr12:27466876|27476920
265	mdm-miR7120a	Chr12:1492847|1513826
266	mdm-miR7120a	Chr05:36214536|36268376
267	mdm-miR7120b	Chr12:1492847|1513826
268	mdm-miR7120b	Chr05:36214536|36268376
269	mdm-miR7120b	Chr12:27466876|27476920
270	mdm-miR7120b	Chr00:6748729|6751911
271	mdm-miR7120b	Chr05:36221550|36275677
272	mdm-miR7120b	Chr05:36223206|36277248
273	mdm-miR7123a	Chr14:1674796|1703770
274	mdm-miR7123b	Chr14:1674796|1703770
275	mdm-miR7124a	Chr11:38348100|38446755
276	mdm-miR7124b	Chr11:38348100|38446755
277	mdm-miR7126	Chr09:9332040|9350168
278	mdm-miR7126	Chr07:5192241|5276163
279	mdm-miR7127a	Chr09:5192137|5227202
280	mdm-miR7127a	Chr09:5191681|5291345
281	mdm-miR7127b	Chr09:5192137|5227202
282	mdm-miR7127b	Chr09:5191681|5291345
283	mdm-miR7128	Chr09:5191681|5291345
284	mdm-miR7128	Chr09:5227531|5293453
285	mdm-miR7128	Chr16:11267911|11350971
286	mdm-miR828a	Chr08:26167641|26198114
287	mdm-miR828b	Chr08:26167641|26198114
288	mdm-miR858	Chr09:5192137|5227202
289	mdm-miR858	Chr09:5191681|5291345
290	mdm-miR858	Chr17:8456475|8471431

## Sheet: Table S11-6
Table S11-6 Interactions between circRNAs and miRNAs in fruits only
Code	miRNA	Target
1	mdm-miR171g	Chr01:27863191|27921821
2	mdm-miR171h	Chr01:27863191|27921821
3	mdm-miR156ad	Chr01:27955214|27993150
4	mdm-miR156ae	Chr01:27955214|27993150
5	mdm-miR169e	Chr01:28802765|28882551
6	mdm-miR169f	Chr01:28802765|28882551
7	mdm-miR477a	Chr01:28802765|28882551
8	mdm-miR7128	Chr01:28802765|28882551
9	mdm-miR164a	Chr01:32468532|32479579
10	mdm-miR164b	Chr01:32468532|32479579
11	mdm-miR164c	Chr01:32468532|32479579
12	mdm-miR164d	Chr01:32468532|32479579
13	mdm-miR164e	Chr01:32468532|32479579
14	mdm-miR164f	Chr01:32468532|32479579
15	mdm-miR156t	Chr02:12203528|12210501
16	mdm-miR156u	Chr02:12203528|12210501
17	mdm-miR156v	Chr02:12203528|12210501
18	mdm-miR156w	Chr02:12203528|12210501
19	mdm-miR156t	Chr02:12205065|12219229
20	mdm-miR156u	Chr02:12205065|12219229
21	mdm-miR156v	Chr02:12205065|12219229
22	mdm-miR156w	Chr02:12205065|12219229
23	mdm-miR171a	Chr02:35643532|35660206
24	mdm-miR171b	Chr02:35643532|35660206
25	mdm-miR7127a	Chr02:8486132|8544082
26	mdm-miR7127b	Chr02:8486132|8544082
27	mdm-miR535b	Chr03:12811510|12811953
28	mdm-miR535c	Chr03:12811510|12811953
29	mdm-miR171i	Chr03:27601103|27612581
30	mdm-miR171j	Chr03:27601103|27612581
31	mdm-miR171k	Chr03:27601103|27612581
32	mdm-miR171l	Chr03:27601103|27612581
33	mdm-miR171i	Chr03:27601489|27613328
34	mdm-miR171j	Chr03:27601489|27613328
35	mdm-miR171k	Chr03:27601489|27613328
36	mdm-miR171l	Chr03:27601489|27613328
37	mdm-miR156aa	Chr05:27303257|27394950
38	mdm-miR156ad	Chr05:27303257|27394950
39	mdm-miR156ae	Chr05:27303257|27394950
40	mdm-miR156p	Chr05:27303257|27394950
41	mdm-miR156q	Chr05:27303257|27394950
42	mdm-miR156r	Chr05:27303257|27394950
43	mdm-miR156s	Chr05:27303257|27394950
44	mdm-miR156t	Chr05:27303257|27394950
45	mdm-miR156u	Chr05:27303257|27394950
46	mdm-miR156v	Chr05:27303257|27394950
47	mdm-miR156w	Chr05:27303257|27394950
48	mdm-miR156x	Chr05:27303257|27394950
49	mdm-miR156y	Chr05:27303257|27394950
50	mdm-miR156z	Chr05:27303257|27394950
51	mdm-miR167b	Chr05:36800517|36848995
52	mdm-miR167c	Chr05:36800517|36848995
53	mdm-miR167d	Chr05:36800517|36848995
54	mdm-miR167e	Chr05:36800517|36848995
55	mdm-miR167f	Chr05:36800517|36848995
56	mdm-miR167g	Chr05:36800517|36848995
57	mdm-miR3627a	Chr05:45800353|45810556
58	mdm-miR3627b	Chr05:45800353|45810556
59	mdm-miR3627c	Chr05:45800353|45810556
60	mdm-miR166a	Chr05:46610748|46630480
61	mdm-miR166b	Chr05:46610748|46630480
62	mdm-miR166c	Chr05:46610748|46630480
63	mdm-miR166d	Chr05:46610748|46630480
64	mdm-miR166e	Chr05:46610748|46630480
65	mdm-miR166f	Chr05:46610748|46630480
66	mdm-miR166g	Chr05:46610748|46630480
67	mdm-miR166h	Chr05:46610748|46630480
68	mdm-miR166i	Chr05:46610748|46630480
69	mdm-miR395a	Chr05:46610748|46630480
70	mdm-miR395b	Chr05:46610748|46630480
71	mdm-miR395c	Chr05:46610748|46630480
72	mdm-miR395d	Chr05:46610748|46630480
73	mdm-miR395e	Chr05:46610748|46630480
74	mdm-miR395f	Chr05:46610748|46630480
75	mdm-miR395g	Chr05:46610748|46630480
76	mdm-miR395h	Chr05:46610748|46630480
77	mdm-miR395i	Chr05:46610748|46630480
78	mdm-miR535a	Chr05:46610748|46630480
79	mdm-miR535d	Chr05:46610748|46630480
80	mdm-miR396c	Chr06:1184144|1210797
81	mdm-miR396d	Chr06:1184144|1210797
82	mdm-miR396e	Chr06:1184144|1210797
83	mdm-miR156ad	Chr06:19223917|19262585
84	mdm-miR156ae	Chr06:19223917|19262585
85	mdm-miR1511	Chr06:20911957|21005923
86	mdm-miR156ad	Chr06:20911957|21005923
87	mdm-miR156ae	Chr06:20911957|21005923
88	mdm-miR397a	Chr06:20911957|21005923
89	mdm-miR397b	Chr06:20911957|21005923
90	mdm-miR156a	Chr07:11672452|11768750
91	mdm-miR156aa	Chr07:11672452|11768750
92	mdm-miR156ab	Chr07:11672452|11768750
93	mdm-miR156ac	Chr07:11672452|11768750
94	mdm-miR156ad	Chr07:11672452|11768750
95	mdm-miR156ae	Chr07:11672452|11768750
96	mdm-miR156b	Chr07:11672452|11768750
97	mdm-miR156c	Chr07:11672452|11768750
98	mdm-miR156d	Chr07:11672452|11768750
99	mdm-miR156e	Chr07:11672452|11768750
100	mdm-miR156f	Chr07:11672452|11768750
101	mdm-miR156g	Chr07:11672452|11768750
102	mdm-miR156h	Chr07:11672452|11768750
103	mdm-miR156i	Chr07:11672452|11768750
104	mdm-miR156j	Chr07:11672452|11768750
105	mdm-miR156k	Chr07:11672452|11768750
106	mdm-miR156l	Chr07:11672452|11768750
107	mdm-miR156m	Chr07:11672452|11768750
108	mdm-miR156n	Chr07:11672452|11768750
109	mdm-miR156o	Chr07:11672452|11768750
110	mdm-miR156t	Chr07:11672452|11768750
111	mdm-miR156u	Chr07:11672452|11768750
112	mdm-miR156v	Chr07:11672452|11768750
113	mdm-miR156w	Chr07:11672452|11768750
114	mdm-miR156x	Chr07:11672452|11768750
115	mdm-miR156y	Chr07:11672452|11768750
116	mdm-miR156z	Chr07:11672452|11768750
117	mdm-miR7124a	Chr07:3247616|3306470
118	mdm-miR7124b	Chr07:3247616|3306470
119	mdm-miR1511	Chr08:29829667|29874944
120	mdm-miR2111a	Chr08:29829667|29874944
121	mdm-miR2111b	Chr08:29829667|29874944
122	mdm-miR7120a	Chr08:29829667|29874944
123	mdm-miR7120b	Chr08:29829667|29874944
124	mdm-miR1511	Chr08:29829793|29875349
125	mdm-miR2111a	Chr08:29829793|29875349
126	mdm-miR2111b	Chr08:29829793|29875349
127	mdm-miR7120a	Chr08:29829793|29875349
128	mdm-miR7120b	Chr08:29829793|29875349
129	mdm-miR7120a	Chr08:29876242|29903527
130	mdm-miR7120b	Chr08:29876242|29903527
131	mdm-miR319a	Chr08:4382657|4429858
132	mdm-miR319b	Chr08:4382657|4429858
133	mdm-miR396a	Chr08:4382657|4429858
134	mdm-miR396b	Chr08:4382657|4429858
135	mdm-miR482b	Chr08:4382657|4429858
136	mdm-miR156aa	Chr09:20862297|20893047
137	mdm-miR156ab	Chr09:20862297|20893047
138	mdm-miR156ac	Chr09:20862297|20893047
139	mdm-miR156p	Chr09:20862297|20893047
140	mdm-miR156q	Chr09:20862297|20893047
141	mdm-miR156r	Chr09:20862297|20893047
142	mdm-miR156s	Chr09:20862297|20893047
143	mdm-miR156x	Chr09:20862297|20893047
144	mdm-miR156y	Chr09:20862297|20893047
145	mdm-miR156z	Chr09:20862297|20893047
146	mdm-miR156a	Chr09:20862297|20959225
147	mdm-miR156aa	Chr09:20862297|20959225
148	mdm-miR156ab	Chr09:20862297|20959225
149	mdm-miR156ac	Chr09:20862297|20959225
150	mdm-miR156ad	Chr09:20862297|20959225
151	mdm-miR156ae	Chr09:20862297|20959225
152	mdm-miR156b	Chr09:20862297|20959225
153	mdm-miR156c	Chr09:20862297|20959225
154	mdm-miR156d	Chr09:20862297|20959225
155	mdm-miR156e	Chr09:20862297|20959225
156	mdm-miR156f	Chr09:20862297|20959225
157	mdm-miR156g	Chr09:20862297|20959225
158	mdm-miR156h	Chr09:20862297|20959225
159	mdm-miR156i	Chr09:20862297|20959225
160	mdm-miR156j	Chr09:20862297|20959225
161	mdm-miR156k	Chr09:20862297|20959225
162	mdm-miR156l	Chr09:20862297|20959225
163	mdm-miR156m	Chr09:20862297|20959225
164	mdm-miR156n	Chr09:20862297|20959225
165	mdm-miR156o	Chr09:20862297|20959225
166	mdm-miR156p	Chr09:20862297|20959225
167	mdm-miR156q	Chr09:20862297|20959225
168	mdm-miR156r	Chr09:20862297|20959225
169	mdm-miR156s	Chr09:20862297|20959225
170	mdm-miR156x	Chr09:20862297|20959225
171	mdm-miR156y	Chr09:20862297|20959225
172	mdm-miR156z	Chr09:20862297|20959225
173	mdm-miR156a	Chr09:20864133|20961709
174	mdm-miR156ad	Chr09:20864133|20961709
175	mdm-miR156ae	Chr09:20864133|20961709
176	mdm-miR156b	Chr09:20864133|20961709
177	mdm-miR156c	Chr09:20864133|20961709
178	mdm-miR156d	Chr09:20864133|20961709
179	mdm-miR156e	Chr09:20864133|20961709
180	mdm-miR156f	Chr09:20864133|20961709
181	mdm-miR156g	Chr09:20864133|20961709
182	mdm-miR156h	Chr09:20864133|20961709
183	mdm-miR156i	Chr09:20864133|20961709
184	mdm-miR156j	Chr09:20864133|20961709
185	mdm-miR156k	Chr09:20864133|20961709
186	mdm-miR156l	Chr09:20864133|20961709
187	mdm-miR156m	Chr09:20864133|20961709
188	mdm-miR156n	Chr09:20864133|20961709
189	mdm-miR156o	Chr09:20864133|20961709
190	mdm-miR156a	Chr09:20865852|20963360
191	mdm-miR156ad	Chr09:20865852|20963360
192	mdm-miR156ae	Chr09:20865852|20963360
193	mdm-miR156b	Chr09:20865852|20963360
194	mdm-miR156c	Chr09:20865852|20963360
195	mdm-miR156d	Chr09:20865852|20963360
196	mdm-miR156e	Chr09:20865852|20963360
197	mdm-miR156f	Chr09:20865852|20963360
198	mdm-miR156g	Chr09:20865852|20963360
199	mdm-miR156h	Chr09:20865852|20963360
200	mdm-miR156i	Chr09:20865852|20963360
201	mdm-miR156j	Chr09:20865852|20963360
202	mdm-miR156k	Chr09:20865852|20963360
203	mdm-miR156l	Chr09:20865852|20963360
204	mdm-miR156m	Chr09:20865852|20963360
205	mdm-miR156n	Chr09:20865852|20963360
206	mdm-miR156o	Chr09:20865852|20963360
207	mdm-miR156ad	Chr09:29859807|29862379
208	mdm-miR156ae	Chr09:29859807|29862379
209	mdm-miR156ad	Chr09:32765658|32801276
210	mdm-miR156ae	Chr09:32765658|32801276
211	mdm-miR156t	Chr09:32765658|32801276
212	mdm-miR156u	Chr09:32765658|32801276
213	mdm-miR156v	Chr09:32765658|32801276
214	mdm-miR156w	Chr09:32765658|32801276
215	mdm-miR164b	Chr10:27462184|27509996
216	mdm-miR164c	Chr10:27462184|27509996
217	mdm-miR164d	Chr10:27462184|27509996
218	mdm-miR164e	Chr10:27462184|27509996
219	mdm-miR164f	Chr10:27462184|27509996
220	mdm-miR169e	Chr10:27462184|27509996
221	mdm-miR169f	Chr10:27462184|27509996
222	mdm-miR164a	Chr11:2396503|2417608
223	mdm-miR172a	Chr11:2396503|2417608
224	mdm-miR172b	Chr11:2396503|2417608
225	mdm-miR172c	Chr11:2396503|2417608
226	mdm-miR172i	Chr11:2396503|2417608
227	mdm-miR172j	Chr11:2396503|2417608
228	mdm-miR172k	Chr11:2396503|2417608
229	mdm-miR172l	Chr11:2396503|2417608
230	mdm-miR172m	Chr11:2396503|2417608
231	mdm-miR172n	Chr11:2396503|2417608
232	mdm-miR172o	Chr11:2396503|2417608
233	mdm-miR159a	Chr11:30797696|30798343
234	mdm-miR159b	Chr11:30797696|30798343
235	mdm-miR7123a	Chr11:41262269|41273109
236	mdm-miR7123b	Chr11:41262269|41273109
237	mdm-miR7123a	Chr11:41267478|41268566
238	mdm-miR7123b	Chr11:41267478|41268566
239	mdm-miR156aa	Chr11:5519296|5544846
240	mdm-miR156x	Chr11:5519296|5544846
241	mdm-miR156y	Chr11:5519296|5544846
242	mdm-miR156z	Chr11:5519296|5544846
243	mdm-miR482b	Chr11:5519296|5544846
244	mdm-miR156ad	Chr11:5521319|5554909
245	mdm-miR156ae	Chr11:5521319|5554909
246	mdm-miR482b	Chr11:5521319|5554909
247	mdm-miR397a	Chr12:28714615|28716377
248	mdm-miR397b	Chr12:28714615|28716377
249	mdm-miR171a	Chr12:32230348|32252920
250	mdm-miR171b	Chr12:32230348|32252920
251	mdm-miR171c	Chr12:32230348|32252920
252	mdm-miR171d	Chr12:32230348|32252920
253	mdm-miR171e	Chr12:32230348|32252920
254	mdm-miR171a	Chr12:32232526|32256815
255	mdm-miR171b	Chr12:32232526|32256815
256	mdm-miR171c	Chr12:32232526|32256815
257	mdm-miR171d	Chr12:32232526|32256815
258	mdm-miR171e	Chr12:32232526|32256815
259	mdm-miR172l	Chr14:18235979|18238795
260	mdm-miR172m	Chr14:18235979|18238795
261	mdm-miR172n	Chr14:18235979|18238795
262	mdm-miR172o	Chr14:18235979|18238795
263	mdm-miR172i	Chr15:37593355|37601680
264	mdm-miR172j	Chr15:37593355|37601680
265	mdm-miR172k	Chr15:37593355|37601680
266	mdm-miR156ad	Chr15:41249981|41329918
267	mdm-miR156ae	Chr15:41249981|41329918
268	mdm-miR162a	Chr15:41249981|41329918
269	mdm-miR162b	Chr15:41249981|41329918
270	mdm-miR172d	Chr15:41330444|41345420
271	mdm-miR172e	Chr15:41330444|41345420
272	mdm-miR172f	Chr15:41330444|41345420
273	mdm-miR172g	Chr15:41330444|41345420
274	mdm-miR172h	Chr15:41330444|41345420
275	mdm-miR172i	Chr15:41330444|41345420
276	mdm-miR172j	Chr15:41330444|41345420
277	mdm-miR172k	Chr15:41330444|41345420
278	mdm-miR482d	Chr15:41330444|41345420
279	mdm-miR171a	Chr15:50232609|50268320
280	mdm-miR171b	Chr15:50232609|50268320
281	mdm-miR535b	Chr16:11296515|11372926
282	mdm-miR535c	Chr16:11296515|11372926
283	mdm-miR7128	Chr16:11296515|11372926
284	mdm-miR167b	Chr16:15626891|15631408
285	mdm-miR167c	Chr16:15626891|15631408
286	mdm-miR167d	Chr16:15626891|15631408
287	mdm-miR167e	Chr16:15626891|15631408
288	mdm-miR167f	Chr16:15626891|15631408
289	mdm-miR167g	Chr16:15626891|15631408
290	mdm-miR319a	Chr16:1771744|1829401
291	mdm-miR319b	Chr16:1771744|1829401
292	mdm-miR7124a	Chr16:38705760|38706006
293	mdm-miR7124b	Chr16:38705760|38706006
294	mdm-miR156ad	Chr17:3477303|3497377
295	mdm-miR156ae	Chr17:3477303|3497377
296	mdm-miR167b	Chr17:5113052|5184823
297	mdm-miR167c	Chr17:5113052|5184823
298	mdm-miR167d	Chr17:5113052|5184823
299	mdm-miR167e	Chr17:5113052|5184823
300	mdm-miR167f	Chr17:5113052|5184823
301	mdm-miR167g	Chr17:5113052|5184823
