# Supplementary material for: Expression Characteristics in Roots, Phloem, Leaves, Flowers and Fruits of Apple circRNA
Source: Genes (Basel). 2022 Apr 18;13(4):712. doi: 10.3390/genes13040712 (PMC9030095; doi:10.3390/genes13040712)
Supplement: Supplementary file 1 [file genes-13-00712-s001.zip › Table S12.xls]

## Sheet: Table S12-1
Table S12-1 miRNAs tagarted by circRNAs in five tissues
Code	miRNA
1	mdm-miR1511
2	mdm-miR156a
3	mdm-miR156aa
4	mdm-miR156ab
5	mdm-miR156ac
6	mdm-miR156ad
7	mdm-miR156ae
8	mdm-miR156b
9	mdm-miR156c
10	mdm-miR156d
11	mdm-miR156e
12	mdm-miR156f
13	mdm-miR156g
14	mdm-miR156h
15	mdm-miR156i
16	mdm-miR156j
17	mdm-miR156k
18	mdm-miR156l
19	mdm-miR156m
20	mdm-miR156n
21	mdm-miR156o
22	mdm-miR156p
23	mdm-miR156q
24	mdm-miR156r
25	mdm-miR156s
26	mdm-miR156t
27	mdm-miR156u
28	mdm-miR156v
29	mdm-miR156w
30	mdm-miR156x
31	mdm-miR156y
32	mdm-miR156z
33	mdm-miR162a
34	mdm-miR162b
35	mdm-miR164a
36	mdm-miR167b
37	mdm-miR167c
38	mdm-miR167d
39	mdm-miR167e
40	mdm-miR167f
41	mdm-miR167g
42	mdm-miR169c
43	mdm-miR169d
44	mdm-miR169e
45	mdm-miR169f
46	mdm-miR171a
47	mdm-miR171b
48	mdm-miR171c
49	mdm-miR171d
50	mdm-miR171e
51	mdm-miR171g
52	mdm-miR171h
53	mdm-miR171j
54	mdm-miR171k
55	mdm-miR171l
56	mdm-miR171m
57	mdm-miR171n
58	mdm-miR172a
59	mdm-miR172b
60	mdm-miR172c
61	mdm-miR172d
62	mdm-miR172e
63	mdm-miR172f
64	mdm-miR172g
65	mdm-miR172h
66	mdm-miR172i
67	mdm-miR172j
68	mdm-miR172k
69	mdm-miR172l
70	mdm-miR172m
71	mdm-miR172n
72	mdm-miR172o
73	mdm-miR319a
74	mdm-miR319b
75	mdm-miR393d
76	mdm-miR393e
77	mdm-miR393f
78	mdm-miR395a
79	mdm-miR395b
80	mdm-miR395c
81	mdm-miR395d
82	mdm-miR395e
83	mdm-miR395f
84	mdm-miR395g
85	mdm-miR395h
86	mdm-miR395i
87	mdm-miR396a
88	mdm-miR396b
89	mdm-miR396c
90	mdm-miR396d
91	mdm-miR396e
92	mdm-miR396f
93	mdm-miR396g
94	mdm-miR397a
95	mdm-miR397b
96	mdm-miR482a-3p
97	mdm-miR482a-5p
98	mdm-miR482b
99	mdm-miR482d
100	mdm-miR535a
101	mdm-miR535b
102	mdm-miR535c
103	mdm-miR7120a
104	mdm-miR7120b
105	mdm-miR7122a
106	mdm-miR7122b
107	mdm-miR7123a
108	mdm-miR7123b
109	mdm-miR7124a
110	mdm-miR7124b
111	mdm-miR7126
112	mdm-miR7127a
113	mdm-miR7127b
114	mdm-miR7128
115	mdm-miR828a
116	mdm-miR828b
117	mdm-miR858

## Sheet: Table S12-2
Table S12-2 miRNAs tagarted by circRNAs in phloem only
Code	miRNA
1	mdm-miR167h
2	mdm-miR167i
3	mdm-miR167j

## Sheet: Table S12-3
Table S12-3 miRNAs tagarted by circRNAs in roots only
Code	miRNA
1	mdm-miR168a
2	mdm-miR168b
3	mdm-miR169a
4	mdm-miR394a
5	mdm-miR394b
