# Supplementary material for: Expression Characteristics in Roots, Phloem, Leaves, Flowers and Fruits of Apple circRNA
Source: Genes (Basel). 2022 Apr 18;13(4):712. doi: 10.3390/genes13040712 (PMC9030095; doi:10.3390/genes13040712)
Supplement: Supplementary file 1 [file genes-13-00712-s001.zip › Table S13.xlsx]

## Sheet: Sheet1
Table S13 List of network of circRNAs-miRNAs-mRNAs
circRNA	miRNA	mRNA	correlation coefficient	p_value	annotation
Chr01:28303728|28375275	mdm-miR1511	MD15G1168600	0.930292	0.0218607	Ubiquitin-like superfamily protein
Chr11:1679797|1735868	mdm-miR156a	MD16G1020900	0.919577	0.0270457	Protein of unknown function
		MD06G1174200	0.882328	0.0475909	myb domain protein 66
		MD07G1057400	0.908388	0.0328248	DNA helicase (RECQl4A)
Chr02:30311907|30404274	mdm-miR156ad	MD13G1168100	0.894892	0.0402552	embryo defective 1703
Chr02:31366499|31401832	mdm-miR164a	MD10G1198400	0.94272	0.0163144	NAC domain containing protein 1
		MD13G1142900	0.981404	0.00303563	TRAF-like family protein
		MD16G1225600	0.890766	0.0426211	Protein of unknown function (DUF3527)
Chr06:30040401|30055168	mdm-miR164a	MD03G1258700	0.927538	0.023159	Ankyrin repeat family protein
Chr01:21162287|21214009	mdm-miR172a	MD05G1031700	0.957202	0.01056	cysteine-rich RLK (RECEPTOR-like protein kinase) 15
Chr17:32635930|32639418	mdm-miR172l	MD11G1139900	0.990785	0.00106043	ATP-dependent helicase family protein
Chr02:31366499|31401832	mdm-miR393d	MD13G1114900	0.888381	0.0440084	urease
		MD17G1066300	0.948707	0.0138374	auxin transport protein (BIG)
Chr05:46571604|46605695	mdm-miR395a	MD09G1005200	0.90785	0.0331115	GRAM domain family protein
Chr11:632755|686146	mdm-miR395a	MD09G1005200	0.932589	0.0207967	GRAM domain family protein
Chr17:14900486|14938412	mdm-miR395a	MD05G1293900	0.995581	0.000352369	nitrate transporter 1:2
Chr06:1184730|1211394	mdm-miR396c	MD13G1134100	0.881946	0.0478201	minichromosome maintenance (MCM2/3/5) family protein
		MD17G1186900	0.943752	0.0158782	FAR1-related sequence 5
		MD14G1017600	0.911996	0.0309221	growth-regulating factor 3
		MD15G1227300	0.993427	0.000639018	FAR1-related sequence 5
		MD17G1164200	0.984612	0.00228606	Ubiquitin-specific protease family C19-related protein
		MD17G1059600	0.912844	0.0304804	exocyst subunit exo70 family protein E1
Chr03:1226434|1277176	mdm-miR482a-3p	MD05G1349900	0.923508	0.0251021	Protein of unknown function
Chr09:5191681|5226302	mdm-miR482a-5p	MD00G1120600	0.929206	0.0223698	NB-ARC domain-containing disease resistance protein
		MD10G1007600	0.953177	0.0120768	disease resistance protein (TIR-NBS-LRR class)
		MD05G1008000	0.95902	0.00989685	Protein of unknown function
		MD07G1025200	0.951924	0.0125621	NB-ARC domain-containing disease resistance protein
		MD10G1006400	0.897707	0.0386658	disease resistance protein (TIR-NBS-LRR class)
		MD09G1225800	0.891561	0.0421616	Chaperone DnaJ-domain superfamily protein
		MD03G1034200	0.946323	0.0148078	Protein of unknown function
		MD07G1097000	0.958325	0.0101487	Alcohol dehydrogenase transcription factor Myb/SANT-like family protein
		MD10G1006800	0.885652	0.0456128	Disease resistance protein (TIR-NBS-LRR class) family
		MD02G1158300	0.903053	0.035704	Phototropic-responsive NPH3 family protein
		MD02G1130800	0.930446	0.0217888	ferredoxin-NADP(+)-oxidoreductase 1
		MD09G1246900	0.91064	0.0316328	Glycosyl hydrolase superfamily protein
		MD08G1063700	0.965426	0.00767693	Mitochondrial substrate carrier family protein
		MD12G1144300	0.915639	0.0290383	laccase 17
		MD10G1084500	0.895961	0.0396487	general regulatory factor 2
		MD05G1179100	0.941579	0.0168013	peroxisomal 3-ketoacyl-CoA thiolase 3
		MD11G1110200	0.884385	0.0463635	U-box domain-containing protein kinase family protein
		MD08G1115600	0.929474	0.022244	tocopherol cyclase
		MD00G1008700	0.939496	0.0177023	trehalose-phosphatase/synthase 7
		MD11G1212700	0.932921	0.0206443	Alpha amylase family protein
Chr17:1815159|1877319	mdm-miR482b	MD05G1138500	0.916596	0.02855	Disease resistance protein (TIR-NBS-LRR class) family
		MD12G1066800	0.893441	0.0410822	Protein of unknown function
Chr03:31052836|31064477	mdm-miR482d	MD05G1349900	0.922529	0.0255819	Protein of unknown function
Chr06:30040401|30055168	mdm-miR535b	MD04G1127100	0.898611	0.0381594	Protein of unknown function
Chr17:14900486|14938412	mdm-miR535b	MD03G1229200	0.964252	0.00806975	embryo defective 2737
Chr10:1743380|1840716	mdm-miR7120a	MD10G1256400	0.899068	0.0379043	MED19A
Chr09:9333615|9353369	mdm-miR7126	MD02G1266700	0.994531	0.000485146	SAD1/UNC-84 domain protein 1
Chr09:5191681|5226302	mdm-miR7127a	MD02G1170500	0.939936	0.0175108	Protein of unknown function
		MD12G1035000	0.91514	0.0292944	Late embryogenesis abundant (LEA) hydroxyproline-rich glycoprotein family
		MD12G1004800	0.928985	0.0224738	copper/zinc superoxide dismutase 3
		MD05G1264100	0.89232	0.041725	pentatricopeptide (PPR) repeat-containing protein
		MD04G1110000	0.965953	0.0075028	Protein of unknown function
		MD13G1192700	0.910072	0.0319325	Acyl-CoA N-acyltransferase with RING/FYVE/PHD-type zinc finger protein
		MD08G1245000	0.909643	0.0321592	Protein of unknown function
		MD06G1184000	0.958858	0.00995535	5-formyltetrahydrofolate cycloligase
Chr09:5191681|5226302	mdm-miR858	MD01G1051700	0.915305	0.0292097	beta-galactosidase 8
		MD07G1017600	0.91569	0.0290125	Protein of unknown function (DUF1423)
		MD16G1029400	0.90492	0.0346878	myb domain protein 7
		MD02G1087900	0.978278	0.0038307	Duplicated homeodomain-like superfamily protein
